# Supplementary material for: Secretome and degradome profiling shows that Kallikrein‐related peptidases 4, 5, 6, and 7 induce TGFβ‐1 signaling in ovarian cancer cells
Source: PubMed Central journal article supplement — Mol Oncol. 2013 Oct 1;8(1):68–82. doi: 10.1016/j.molonc.2013.09.003 (PMC5528505; doi:10.1016/j.molonc.2013.09.003), 2013-10-01
Supplement: MOL2-8-068-s001.pdf [file MOL2-8-068-s001.pdf]

Table S1

Table S1: Identified and quantified proteins in the first replicate of global proteome comparison.  
 All proteins have a ProteinProphet probability score > 0.90, equivalent to an FDR < 0.01.  
 Ratios are normalized to hK expression / control.

| Uniprot accession | Name                                                      | Fold-change (log <sub>2</sub> ) of ASAPratio | Fold-change standard deviation | ASPARatio p-value | Sequence coverage (%) |
|-------------------|-----------------------------------------------------------|----------------------------------------------|--------------------------------|-------------------|-----------------------|
| Q01970            | 1-phosphatidylinositol 4,5-bisphosphate phosphodiesterase | -0.84                                        | -0.63                          | 0.55              | 3.30                  |
| Q9BV57            | 1,2-dihydroxy-3-keto-5-methylthiopentene dioxygenase;     | 0.75                                         | 0.08                           | 0.41              | 7.30                  |
| Q04446            | 1,4-alpha-glucan-branching enzyme;                        | -0.12                                        | -0.03                          | 0.89              | 8.70                  |
| P61604            | 10 kDa heat shock protein, mitochondrial;                 | 0.60                                         | 0.10                           | 0.51              | 30.40                 |
| Q15029            | 116 kDa U5 small nuclear ribonucleoprotein component;     | -0.18                                        | -0.11                          | 0.88              | 13.30                 |
| Q9NRX4            | 14 kDa phosphohistidine phosphatase;                      | -0.36                                        | -0.02                          | 0.69              | 8.80                  |
| P31946            | 14-3-3 protein beta/alpha;                                | -0.84                                        | -0.16                          | 0.37              | 41.50                 |
| P62258            | 14-3-3 protein epsilon;                                   | -1.00                                        | -0.34                          | 0.32              | 44.70                 |
| Q04917            | 14-3-3 protein eta;                                       | -0.56                                        | -0.38                          | 0.68              | 34.60                 |
| P61981            | 14-3-3 protein gamma;                                     | -0.60                                        | -0.07                          | 0.50              | 24.70                 |
| P31947            | 14-3-3 protein sigma;                                     | -0.58                                        | -0.31                          | 0.62              | 19.40                 |
| P27348            | 14-3-3 protein theta;                                     | -0.34                                        | -0.16                          | 0.77              | 38.40                 |
| P63104            | 14-3-3 protein zeta/delta;                                | -0.54                                        | -0.29                          | 0.65              | 38.40                 |
| Q8N543            | 2-oxoglutarate and iron-dependent oxygenase domain-con    | 0.15                                         | 0.01                           | 0.86              | 1.80                  |
| P62333            | 26S protease regulatory subunit 10B;                      | 0.45                                         | 0.05                           | 0.61              | 9.00                  |
| P17980            | 26S protease regulatory subunit 6A;                       | -0.38                                        | -0.51                          | 0.86              | 19.10                 |
| P43686            | 26S protease regulatory subunit 6B;                       | 1.25                                         | 0.06                           | 0.16              | 3.30                  |
| O00231            | 26S proteasome non-ATPase regulatory subunit 11;          | 1.04                                         | 0.12                           | 0.25              | 11.10                 |
| Q9UNM6            | 26S proteasome non-ATPase regulatory subunit 13;          | -0.03                                        | -0.01                          | 0.97              | 13.00                 |
| O00487            | 26S proteasome non-ATPase regulatory subunit 14;          | 1.72                                         | 0.23                           | 0.06              | 4.20                  |
| Q13200            | 26S proteasome non-ATPase regulatory subunit 2;           | 0.71                                         | 0.34                           | 0.53              | 10.00                 |
| O43242            | 26S proteasome non-ATPase regulatory subunit 3;           | 1.45                                         | 0.30                           | 0.12              | 9.90                  |
| P55036            | 26S proteasome non-ATPase regulatory subunit 4;           | 0.00                                         | 0.00                           | 1.00              | 4.00                  |
| Q16401            | 26S proteasome non-ATPase regulatory subunit 5;           | -0.40                                        | -0.20                          | 0.73              | 12.50                 |
| Q15008            | 26S proteasome non-ATPase regulatory subunit 6;           | 1.17                                         | 0.33                           | 0.23              | 11.60                 |
| P51665            | 26S proteasome non-ATPase regulatory subunit 7;           | 0.69                                         | 0.03                           | 0.44              | 9.90                  |
| P48556            | 26S proteasome non-ATPase regulatory subunit 8;           | 0.78                                         | 0.21                           | 0.42              | 5.40                  |
| O00233            | 26S proteasome non-ATPase regulatory subunit 9;           | 0.28                                         | 0.03                           | 0.76              | 5.40                  |
| P31937            | 3-hydroxyisobutyrate dehydrogenase, mitochondrial;        | -0.79                                        | -0.26                          | 0.44              | 8.00                  |
| Q6NVY1            | 3-hydroxyisobutyryl-CoA hydrolase, mitochondrial;         | -0.69                                        | -0.10                          | 0.45              | 3.10                  |
| P42765            | 3-ketoacyl-CoA thiolase, mitochondrial;                   | 0.51                                         | 0.07                           | 0.58              | 3.30                  |
| O95861            | 3'(2'),5'-bisphosphate nucleotidase 1;                    | -1.06                                        | -0.46                          | 0.34              | 9.10                  |
| P49189            | 4-trimethylaminobutyraldehyde dehydrogenase;              | 0.07                                         | 0.01                           | 0.94              | 2.40                  |
| P46783            | 40S ribosomal protein S10;                                | 0.64                                         | 0.07                           | 0.48              | 14.50                 |
| P62280            | 40S ribosomal protein S11;                                | 1.50                                         | 1.12                           | 0.28              | 20.90                 |
| P25398            | 40S ribosomal protein S12;                                | -0.04                                        | -0.02                          | 0.96              | 46.20                 |
| P62277            | 40S ribosomal protein S13;                                | 0.98                                         | 0.11                           | 0.28              | 24.50                 |
| P62263            | 40S ribosomal protein S14;                                | 0.94                                         | 0.15                           | 0.31              | 15.20                 |
| P62841            | 40S ribosomal protein S15;                                | 0.63                                         | 0.12                           | 0.50              | 8.30                  |
| P62244            | 40S ribosomal protein S15a;                               | 0.25                                         | 0.04                           | 0.79              | 13.80                 |
| P62249            | 40S ribosomal protein S16;                                | 1.71                                         | 0.36                           | 0.07              | 28.10                 |
| P62269            | 40S ribosomal protein S18;                                | 0.71                                         | 0.34                           | 0.53              | 27.00                 |
| P39019            | 40S ribosomal protein S19;                                | 0.03                                         | 0.01                           | 0.98              | 24.10                 |
| P15880            | 40S ribosomal protein S2;                                 | 0.28                                         | 0.11                           | 0.79              | 22.90                 |
| P63220            | 40S ribosomal protein S21;                                | -0.40                                        | -0.04                          | 0.65              | 28.90                 |
| P62266            | 40S ribosomal protein S23;                                | 3.89                                         | 3.85                           | 0.02              | 7.70                  |
| P62847            | 40S ribosomal protein S24;                                | 0.64                                         | 0.05                           | 0.48              | 8.30                  |
| P62851            | 40S ribosomal protein S25;                                | 0.73                                         | 0.03                           | 0.41              | 7.20                  |
| Q71UM5            | 40S ribosomal protein S27-like;                           | 0.79                                         | 0.16                           | 0.40              | 28.60                 |
| P42677            | 40S ribosomal protein S27;                                | 1.07                                         | 0.26                           | 0.26              | 28.60                 |
| P62857            | 40S ribosomal protein S28;                                | 0.20                                         | 0.02                           | 0.82              | 17.40                 |
| P23396            | 40S ribosomal protein S3;                                 | 0.68                                         | 0.22                           | 0.50              | 45.70                 |
| P61247            | 40S ribosomal protein S3a;                                | 0.70                                         | 0.40                           | 0.57              | 24.60                 |
| P62701            | 40S ribosomal protein S4, X isoform;                      | 0.88                                         | 0.16                           | 0.34              | 22.40                 |

Table S1

| Uniprot accession | Name                                                  | Fold-change (log <sub>2</sub> ) of ASPAratio | Fold-change standard deviation | ASPAratio p-value | Sequence coverage (%) |
|-------------------|-------------------------------------------------------|----------------------------------------------|--------------------------------|-------------------|-----------------------|
| P46782            | 40S ribosomal protein S5;                             | -0.43                                        | -0.10                          | 0.65              | 23.00                 |
| P62753            | 40S ribosomal protein S6;                             | 0.15                                         | 0.08                           | 0.89              | 15.70                 |
| P62081            | 40S ribosomal protein S7;                             | 0.50                                         | 0.25                           | 0.67              | 14.90                 |
| P62241            | 40S ribosomal protein S8;                             | 0.75                                         | 0.16                           | 0.43              | 29.30                 |
| P46781            | 40S ribosomal protein S9;                             | 0.48                                         | 0.08                           | 0.61              | 9.80                  |
| P08865            | 40S ribosomal protein SA;                             | -0.15                                        | -0.06                          | 0.89              | 20.00                 |
| Q9BRK5            | 45 kDa calcium-binding protein;                       | 0.58                                         | 0.14                           | 0.55              | 24.30                 |
| P08195            | 4F2 cell-surface antigen heavy chain;                 | 0.95                                         | 0.38                           | 0.37              | 4.90                  |
| O14841            | 5-oxoprolinase;                                       | -0.54                                        | -0.23                          | 0.63              | 2.70                  |
| Q9H0D6            | 5'-3' exoribonuclease 2;                              | -0.60                                        | -0.25                          | 0.57              | 6.10                  |
| Q5TFE4            | 5'-nucleotidase domain-containing protein 1;          | -1.22                                        | -0.14                          | 0.18              | 7.90                  |
| P21589            | 5'-nucleotidase;                                      | -0.32                                        | -0.10                          | 0.75              | 2.10                  |
| Q01813            | 6-phosphofructokinase type C;                         | -0.92                                        | -1.16                          | 0.65              | 8.20                  |
| P08237            | 6-phosphofructokinase, muscle type;                   | 0.90                                         | 0.11                           | 0.32              | 1.50                  |
| P52209            | 6-phosphogluconate dehydrogenase, decarboxylating;    | 0.03                                         | 0.02                           | 0.99              | 24.60                 |
| O95336            | 6-phosphogluconolactonase;                            | -1.22                                        | -0.85                          | 0.37              | 41.50                 |
| P10809            | 60 kDa heat shock protein, mitochondrial;             | -0.11                                        | -0.05                          | 0.92              | 30.20                 |
| P05388            | 60S acidic ribosomal protein P0;                      | 0.97                                         | 0.20                           | 0.30              | 35.60                 |
| P05386            | 60S acidic ribosomal protein P1;                      | 0.91                                         | 0.12                           | 0.32              | 14.00                 |
| P05387            | 60S acidic ribosomal protein P2;                      | 0.48                                         | 0.12                           | 0.63              | 55.70                 |
| P62906            | 60S ribosomal protein L10a;                           | 0.25                                         | 0.07                           | 0.80              | 34.60                 |
| P62913            | 60S ribosomal protein L11;                            | 0.37                                         | 0.08                           | 0.70              | 12.90                 |
| P30050            | 60S ribosomal protein L12;                            | 0.33                                         | 0.12                           | 0.75              | 54.50                 |
| P26373            | 60S ribosomal protein L13;                            | 0.49                                         | 0.28                           | 0.69              | 14.70                 |
| P50914            | 60S ribosomal protein L14;                            | 1.04                                         | 0.45                           | 0.34              | 20.90                 |
| P61313            | 60S ribosomal protein L15;                            | 0.88                                         | 0.24                           | 0.36              | 5.90                  |
| P18621            | 60S ribosomal protein L17;                            | 0.63                                         | 0.14                           | 0.51              | 26.10                 |
| Q07020            | 60S ribosomal protein L18;                            | 0.20                                         | 0.07                           | 0.84              | 18.60                 |
| Q02543            | 60S ribosomal protein L18a;                           | 1.29                                         | 0.55                           | 0.24              | 17.00                 |
| P46778            | 60S ribosomal protein L21;                            | 0.77                                         | 0.56                           | 0.58              | 16.20                 |
| Q6P5R6            | 60S ribosomal protein L22-like 1;                     | 0.92                                         | 0.15                           | 0.32              | 9.80                  |
| P35268            | 60S ribosomal protein L22;                            | 0.60                                         | 0.04                           | 0.50              | 10.20                 |
| P62829            | 60S ribosomal protein L23;                            | -0.43                                        | -0.61                          | 0.85              | 36.40                 |
| P62750            | 60S ribosomal protein L23a;                           | 0.60                                         | 0.12                           | 0.52              | 13.50                 |
| P83731            | 60S ribosomal protein L24;                            | 0.56                                         | 0.05                           | 0.54              | 19.10                 |
| P61353            | 60S ribosomal protein L27;                            | 0.43                                         | 0.21                           | 0.70              | 14.70                 |
| P47914            | 60S ribosomal protein L29;                            | 0.82                                         | 0.09                           | 0.36              | 9.40                  |
| P39023            | 60S ribosomal protein L3;                             | 0.15                                         | 0.10                           | 0.91              | 13.60                 |
| P62888            | 60S ribosomal protein L30;                            | 0.19                                         | 0.01                           | 0.83              | 24.30                 |
| P62899            | 60S ribosomal protein L31;                            | 0.24                                         | 0.04                           | 0.80              | 24.80                 |
| P62910            | 60S ribosomal protein L32;                            | -0.09                                        | -0.01                          | 0.92              | 17.00                 |
| P18077            | 60S ribosomal protein L35a;                           | 1.78                                         | 0.15                           | 0.05              | 16.40                 |
| Q9Y3U8            | 60S ribosomal protein L36;                            | -0.20                                        | -0.10                          | 0.86              | 20.00                 |
| P61513            | 60S ribosomal protein L37a;                           | -0.43                                        | -0.03                          | 0.63              | 13.00                 |
| P63173            | 60S ribosomal protein L38;                            | -2.06                                        | -0.09                          | 0.02              | 10.00                 |
| P36578            | 60S ribosomal protein L4;                             | 1.32                                         | 0.81                           | 0.29              | 12.40                 |
| P46777            | 60S ribosomal protein L5;                             | -0.94                                        | -0.40                          | 0.39              | 33.30                 |
| Q02878            | 60S ribosomal protein L6;                             | 0.71                                         | 0.45                           | 0.58              | 27.40                 |
| P18124            | 60S ribosomal protein L7;                             | 0.51                                         | 0.10                           | 0.59              | 14.90                 |
| P62424            | 60S ribosomal protein L7a;                            | 0.82                                         | 0.07                           | 0.36              | 3.40                  |
| P62917            | 60S ribosomal protein L8;                             | -1.06                                        | -1.02                          | 0.52              | 10.50                 |
| P32969            | 60S ribosomal protein L9;                             | -0.56                                        | -0.43                          | 0.70              | 10.90                 |
| Q9Y221            | 60S ribosome subunit biogenesis protein NIP7 homolog; | 1.01                                         | 0.15                           | 0.27              | 7.80                  |
| P11021            | 78 kDa glucose-regulated protein;                     | 0.25                                         | 0.10                           | 0.81              | 31.80                 |
| Q7L2J0            | 7SK snRNA methylphosphate capping enzyme;             | -2.40                                        | -0.13                          | 0.01              | 1.50                  |
| Q02952            | A-kinase anchor protein 12;                           | -0.38                                        | -0.36                          | 0.82              | 18.90                 |
| Q9ULX6            | A-kinase anchor protein 8-like;                       | -1.32                                        | -0.20                          | 0.15              | 2.30                  |

Table S1

| Uniprot accession | Name                                                      | Fold-change (log <sub>2</sub> ) of ASPAratio | Fold-change standard deviation | ASPAratio p-value | Sequence coverage (%) |
|-------------------|-----------------------------------------------------------|----------------------------------------------|--------------------------------|-------------------|-----------------------|
| Q9BWD1            | Acetyl-CoA acetyltransferase, cytosolic;                  | 0.48                                         | 0.27                           | 0.70              | 19.10                 |
| P24752            | Acetyl-CoA acetyltransferase, mitochondrial;              | -0.54                                        | -0.10                          | 0.57              | 2.10                  |
| Q13085            | Acetyl-CoA carboxylase 1;                                 | 3.24                                         | 0.52                           | 0.00              | 0.50                  |
| P50553            | Achaete-scute homolog 1;                                  | -2.25                                        | -0.11                          | 0.01              | 4.20                  |
| Q13510            | Acid ceramidase;                                          | 0.59                                         | 0.37                           | 0.65              | 21.00                 |
| P39687            | Acidic leucine-rich nuclear phosphoprotein 32 family men  | -0.69                                        | -0.46                          | 0.60              | 23.70                 |
| Q92688            | Acidic leucine-rich nuclear phosphoprotein 32 family men  | -0.69                                        | -0.22                          | 0.49              | 24.30                 |
| Q9BTT0            | Acidic leucine-rich nuclear phosphoprotein 32 family men  | 0.71                                         | 0.06                           | 0.43              | 4.50                  |
| Q99798            | Aconitate hydratase, mitochondrial;                       | -0.54                                        | -0.19                          | 0.60              | 4.50                  |
| P61160            | Actin-related protein 2;                                  | -1.06                                        | -1.26                          | 0.59              | 16.20                 |
| Q92747            | Actin-related protein 2/3 complex subunit 1A;             | 0.12                                         | 0.02                           | 0.89              | 7.00                  |
| O15143            | Actin-related protein 2/3 complex subunit 1B;             | 0.21                                         | 0.10                           | 0.85              | 21.50                 |
| O15144            | Actin-related protein 2/3 complex subunit 2;              | -0.58                                        | -0.35                          | 0.64              | 13.70                 |
| P59998            | Actin-related protein 2/3 complex subunit 4;              | 0.91                                         | 0.79                           | 0.55              | 11.30                 |
| O15511            | Actin-related protein 2/3 complex subunit 5;              | -0.92                                        | -0.09                          | 0.31              | 29.10                 |
| P61158            | Actin-related protein 3;                                  | -0.92                                        | -0.29                          | 0.37              | 34.40                 |
| P62736            | Actin, aortic smooth muscle;                              | 0.00                                         | 0.00                           | 1.00              | 27.70                 |
| P60709            | Actin, cytoplasmic 1;                                     | -0.58                                        | -0.40                          | 0.66              | 43.50                 |
| P53999            | Activated RNA polymerase II transcriptional coactivator p | 0.91                                         | 0.44                           | 0.42              | 37.00                 |
| O95433            | Activator of 90 kDa heat shock protein ATPase homolog 1   | 0.39                                         | 0.08                           | 0.68              | 23.40                 |
| P07108            | Acyl-CoA-binding protein;                                 | 0.40                                         | 0.07                           | 0.66              | 32.20                 |
| O75608            | Acyl-protein thioesterase 1;                              | 1.13                                         | 0.06                           | 0.21              | 4.80                  |
| O95372            | Acyl-protein thioesterase 2;                              | -2.56                                        | -2.86                          | 0.16              | 15.60                 |
| P13798            | Acylamino-acid-releasing enzyme;                          | -1.06                                        | -0.49                          | 0.35              | 9.30                  |
| P07311            | Acylphosphatase-1;                                        | -1.43                                        | -0.16                          | 0.11              | 13.10                 |
| Q6UY14            | ADAMTS-like protein 4;                                    | -0.27                                        | -0.13                          | 0.81              | 5.80                  |
| P46108            | Adapter molecule crk;                                     | 0.58                                         | 0.56                           | 0.73              | 10.50                 |
| P00813            | Adenosine deaminase;                                      | 3.70                                         | 0.46                           | 0.00              | 2.80                  |
| P55263            | Adenosine kinase;                                         | 0.07                                         | 0.02                           | 0.94              | 15.50                 |
| P23526            | Adenosylhomocysteinase;                                   | -0.60                                        | -0.24                          | 0.57              | 30.60                 |
| P54819            | Adenylate kinase 2, mitochondrial;                        | -2.00                                        | -1.52                          | 0.15              | 33.10                 |
| P00568            | Adenylate kinase isoenzyme 1;                             | 0.07                                         | 0.01                           | 0.94              | 11.30                 |
| P30566            | Adenylosuccinate lyase;                                   | 0.03                                         | 0.01                           | 0.98              | 10.30                 |
| P30520            | Adenylosuccinate synthetase isozyme 2;                    | 0.08                                         | 0.08                           | 0.96              | 9.60                  |
| Q01518            | Adenylyl cyclase-associated protein 1;                    | -1.12                                        | -0.58                          | 0.33              | 20.20                 |
| P61204            | ADP-ribosylation factor 3;                                | -0.12                                        | -0.01                          | 0.89              | 27.60                 |
| P62330            | ADP-ribosylation factor 6;                                | 0.21                                         | 0.09                           | 0.84              | 14.30                 |
| Q9NZ52            | ADP-ribosylation factor-binding protein GGA3;             | 0.08                                         | 0.01                           | 0.92              | 1.70                  |
| Q9UKK9            | ADP-sugar pyrophosphatase;                                | -0.64                                        | -0.16                          | 0.51              | 32.90                 |
| P55196            | Afadin;                                                   | -0.23                                        | -0.03                          | 0.80              | 2.00                  |
| O43488            | Aflatoxin B1 aldehyde reductase member 2;                 | -1.22                                        | -0.11                          | 0.18              | 8.40                  |
| O00468            | Agtrin;                                                   | 0.68                                         | 0.48                           | 0.62              | 24.00                 |
| O00170            | AH receptor-interacting protein;                          | -0.60                                        | -0.12                          | 0.52              | 12.10                 |
| P49588            | Alanine--tRNA ligase, cytoplasmic;                        | 0.71                                         | 0.36                           | 0.54              | 9.60                  |
| P14550            | Alcohol dehydrogenase [NADP(+)];                          | 0.63                                         | 0.49                           | 0.66              | 18.80                 |
| P11766            | Alcohol dehydrogenase class-3;                            | -1.22                                        | -0.79                          | 0.35              | 17.10                 |
| P47895            | Aldehyde dehydrogenase family 1 member A3;                | -0.89                                        | -0.48                          | 0.45              | 21.30                 |
| Q8IZ83            | Aldehyde dehydrogenase family 16 member A1;               | -0.84                                        | -0.15                          | 0.36              | 2.00                  |
| P15121            | Aldose reductase;                                         | -1.47                                        | -0.82                          | 0.22              | 28.20                 |
| P05187            | Alkaline phosphatase, placental type;                     | -0.69                                        | -0.09                          | 0.45              | 21.10                 |
| P10696            | Alkaline phosphatase, placental-like;                     | 1.20                                         | 0.20                           | 0.19              | 21.20                 |
| Q9BYC5            | Alpha-(1,6)-fucosyltransferase;                           | 1.86                                         | 0.14                           | 0.04              | 2.10                  |
| P01011            | Alpha-1-antichymotrypsin;                                 | 2.03                                         | 1.42                           | 0.13              | 12.30                 |
| P01009            | Alpha-1-antitrypsin;                                      | 2.74                                         | 0.29                           | 0.00              | 15.30                 |
| Q10469            | Alpha-1,6-mannosyl-glycoprotein 2-beta-N-acetylglucosar   | 0.65                                         | 0.15                           | 0.49              | 5.40                  |
| Q09328            | Alpha-1,6-mannosylglycoprotein 6-beta-N-acetylglucosar    | -0.94                                        | -1.02                          | 0.60              | 5.80                  |
| P02765            | Alpha-2-HS-glycoprotein;                                  | -0.04                                        | 0.00                           | 0.96              | 5.20                  |

Table S1

| Uniprot accession | Name                                                     | Fold-change (log <sub>2</sub> ) of ASAPratio | Fold-change standard deviation | ASPARatio p-value | Sequence coverage (%) |
|-------------------|----------------------------------------------------------|----------------------------------------------|--------------------------------|-------------------|-----------------------|
| P30533            | Alpha-2-macroglobulin receptor-associated protein;       | -1.74                                        | -0.23                          | 0.05              | 3.60                  |
| P01023            | Alpha-2-macroglobulin;                                   | 1.05                                         | 0.23                           | 0.27              | 1.40                  |
| P12814            | Alpha-actinin-1;                                         | 0.28                                         | 0.21                           | 0.84              | 46.70                 |
| Q08043            | Alpha-actinin-3;                                         | -6.64                                        | 0.00                           | 0.00              | 9.90                  |
| O43707            | Alpha-actinin-4;                                         | -0.23                                        | -0.11                          | 0.84              | 51.00                 |
| P06733            | Alpha-enolase;                                           | -1.32                                        | -0.66                          | 0.24              | 43.50                 |
| P06280            | Alpha-galactosidase A;                                   | 1.02                                         | 0.72                           | 0.45              | 13.10                 |
| Q9C0B1            | Alpha-ketoglutarate-dependent dioxygenase FTO;           | -0.49                                        | -0.07                          | 0.58              | 3.80                  |
| P35475            | Alpha-L-iduronidase;                                     | 0.12                                         | 0.05                           | 0.91              | 8.00                  |
| Q16706            | Alpha-mannosidase 2;                                     | -0.58                                        | -0.46                          | 0.69              | 4.30                  |
| P54802            | Alpha-N-acetylglucosaminidase;                           | 0.26                                         | 0.30                           | 0.89              | 9.20                  |
| P54920            | Alpha-soluble NSF attachment protein;                    | -2.06                                        | -2.66                          | 0.32              | 9.80                  |
| Q9BUJ0            | Alpha/beta hydrolase domain-containing protein 14A;      | 7.96                                         | 1.24                           | 0.00              | 5.90                  |
| Q96IU4            | Alpha/beta hydrolase domain-containing protein 14B;      | 0.79                                         | 0.06                           | 0.38              | 17.60                 |
| Q06203            | Amidophosphoribosyltransferase;                          | 0.51                                         | 0.26                           | 0.66              | 4.40                  |
| Q12904            | Aminoacyl tRNA synthase complex-interacting multifunct   | -0.60                                        | -0.61                          | 0.72              | 13.10                 |
| Q03154            | Aminoacylase-1;                                          | -1.52                                        | -0.61                          | 0.15              | 9.80                  |
| Q9H4A4            | Aminopeptidase B;                                        | 0.19                                         | 0.12                           | 0.89              | 22.50                 |
| Q01433            | AMP deaminase 2;                                         | -0.25                                        | -0.01                          | 0.78              | 1.10                  |
| P05067            | Amyloid beta A4 protein;                                 | 0.24                                         | 0.12                           | 0.84              | 21.20                 |
| Q06481            | Amyloid-like protein 2;                                  | 0.90                                         | 0.15                           | 0.33              | 3.00                  |
| Q6FI81            | Anamorsin;                                               | 0.81                                         | 0.09                           | 0.38              | 4.80                  |
| Q13685            | Angio-associated migratory cell protein;                 | 1.02                                         | 0.14                           | 0.26              | 3.00                  |
| P04083            | Annexin A1;                                              | -0.84                                        | -0.43                          | 0.47              | 52.00                 |
| P50995            | Annexin A11;                                             | -0.84                                        | -0.40                          | 0.46              | 9.10                  |
| P07355            | Annexin A2;                                              | -1.00                                        | -0.28                          | 0.30              | 49.90                 |
| P12429            | Annexin A3;                                              | 1.77                                         | 1.65                           | 0.27              | 26.30                 |
| P08758            | Annexin A5;                                              | -1.25                                        | -0.57                          | 0.26              | 33.10                 |
| P46013            | Antigen KI-67;                                           | 3.12                                         | 0.65                           | 0.00              | 0.30                  |
| P01008            | Antithrombin-III;                                        | 0.91                                         | 0.04                           | 0.31              | 3.90                  |
| Q10567            | AP-1 complex subunit beta-1;                             | -1.25                                        | -0.89                          | 0.36              | 7.30                  |
| Q9BXS5            | AP-1 complex subunit mu-1;                               | -0.15                                        | -0.10                          | 0.91              | 12.50                 |
| O95782            | AP-2 complex subunit alpha-1;                            | -0.36                                        | -0.06                          | 0.70              | 9.70                  |
| O94973            | AP-2 complex subunit alpha-2;                            | -1.74                                        | -0.41                          | 0.07              | 6.30                  |
| P63010            | AP-2 complex subunit beta;                               | 0.11                                         | 0.06                           | 0.93              | 14.80                 |
| Q96CW1            | AP-2 complex subunit mu;                                 | -0.12                                        | -0.03                          | 0.90              | 13.60                 |
| O00203            | AP-3 complex subunit beta-1;                             | -0.32                                        | -0.02                          | 0.73              | 0.90                  |
| O14617            | AP-3 complex subunit delta-1;                            | 1.36                                         | 0.21                           | 0.14              | 1.60                  |
| Q9Y2T2            | AP-3 complex subunit mu-1;                               | -1.74                                        | -0.17                          | 0.05              | 2.90                  |
| P04114            | Apolipoprotein B-100;                                    | 3.23                                         | 0.18                           | 0.00              | 0.30                  |
| P02656            | Apolipoprotein C-III;                                    | 1.01                                         | 0.21                           | 0.29              | 16.20                 |
| Q9BZZ5            | Apoptosis inhibitor 5;                                   | -0.40                                        | -0.05                          | 0.66              | 11.30                 |
| O95831            | Apoptosis-inducing factor 1, mitochondrial;              | -0.97                                        | -0.69                          | 0.47              | 9.30                  |
| Q9UKV3            | Apoptotic chromatin condensation inducer in the nucleus; | 0.18                                         | 0.02                           | 0.85              | 2.40                  |
| P54136            | Arginine--tRNA ligase, cytoplasmic;                      | -0.43                                        | -0.22                          | 0.71              | 14.10                 |
| P04424            | Argininosuccinate lyase;                                 | -1.15                                        | -0.28                          | 0.23              | 8.00                  |
| Q8N5I2            | Arrestin domain-containing protein 1;                    | 0.90                                         | 0.05                           | 0.31              | 2.80                  |
| P15289            | Arylsulfatase A;                                         | 1.26                                         | 0.10                           | 0.16              | 2.80                  |
| O43776            | Asparagine--tRNA ligase, cytoplasmic;                    | -0.23                                        | -0.04                          | 0.81              | 8.00                  |
| P17174            | Aspartate aminotransferase, cytoplasmic;                 | 0.18                                         | 0.08                           | 0.88              | 22.00                 |
| P00505            | Aspartate aminotransferase, mitochondrial;               | -1.09                                        | -0.81                          | 0.43              | 25.30                 |
| P14868            | Aspartate--tRNA ligase, cytoplasmic;                     | -0.94                                        | -0.91                          | 0.57              | 13.00                 |
| Q9ULA0            | Aspartyl aminopeptidase;                                 | -1.22                                        | -0.11                          | 0.18              | 3.20                  |
| Q15121            | Astrocytic phosphoprotein PEA-15;                        | 4.08                                         | 0.61                           | 0.00              | 9.20                  |
| Q8WWM7            | Ataxin-2-like protein;                                   | -0.67                                        | -0.06                          | 0.46              | 1.10                  |
| P06576            | ATP synthase subunit beta, mitochondrial;                | 0.25                                         | 0.07                           | 0.80              | 5.50                  |
| P61221            | ATP-binding cassette sub-family E member 1;              | -0.97                                        | -1.31                          | 0.65              | 8.70                  |

Table S1

| Uniprot accession | Name                                                         | Fold-change (log <sub>2</sub> ) of ASARatio | Fold-change standard deviation | ASARatio p-value | Sequence coverage (%) |
|-------------------|--------------------------------------------------------------|---------------------------------------------|--------------------------------|------------------|-----------------------|
| Q8NE71            | ATP-binding cassette sub-family F member 1;                  | -0.76                                       | -0.06                          | 0.40             | 2.50                  |
| P53396            | ATP-citrate synthase;                                        | -0.29                                       | -0.31                          | 0.87             | 22.30                 |
| P46063            | ATP-dependent DNA helicase Q1;                               | 0.48                                        | 0.04                           | 0.60             | 2.50                  |
| Q08211            | ATP-dependent RNA helicase A;                                | 0.53                                        | 0.14                           | 0.59             | 11.80                 |
| Q92499            | ATP-dependent RNA helicase DDX1;                             | -0.45                                       | -0.14                          | 0.65             | 8.80                  |
| Q9NUU7            | ATP-dependent RNA helicase DDX19A;                           | 1.33                                        | 0.32                           | 0.16             | 4.40                  |
| O00571            | ATP-dependent RNA helicase DDX3X;                            | 1.01                                        | 0.44                           | 0.35             | 1.50                  |
| Q86XP3            | ATP-dependent RNA helicase DDX42;                            | -0.43                                       | -0.12                          | 0.66             | 7.40                  |
| O75882            | Attractin;                                                   | -0.01                                       | -0.01                          | 0.99             | 0.70                  |
| O75531            | Barrier-to-autointegration factor;                           | 1.84                                        | 0.37                           | 0.05             | 13.50                 |
| P50895            | Basal cell adhesion molecule;                                | 0.20                                        | 0.07                           | 0.84             | 15.00                 |
| P98160            | Basement membrane-specific heparan sulfate proteoglycan      | 1.06                                        | 0.85                           | 0.46             | 15.20                 |
| P35613            | Basigin;                                                     | -0.27                                       | -0.12                          | 0.81             | 8.80                  |
| P15291            | Beta-1,4-galactosyltransferase 1;                            | -0.32                                       | -0.08                          | 0.74             | 8.30                  |
| O60513            | Beta-1,4-galactosyltransferase 4;                            | -0.12                                       | -0.03                          | 0.90             | 9.90                  |
| P02749            | Beta-2-glycoprotein 1;                                       | 0.37                                        | 0.02                           | 0.68             | 2.60                  |
| P13929            | Beta-enolase;                                                | 0.20                                        | 0.16                           | 0.89             | 13.10                 |
| P16278            | Beta-galactosidase;                                          | -0.36                                       | -0.33                          | 0.82             | 19.90                 |
| P08236            | Beta-glucuronidase;                                          | 2.95                                        | 2.19                           | 0.03             | 4.60                  |
| P06865            | Beta-hexosaminidase subunit alpha;                           | 0.19                                        | 0.29                           | 0.94             | 17.60                 |
| P07686            | Beta-hexosaminidase subunit beta;                            | 1.08                                        | 0.49                           | 0.33             | 23.40                 |
| O00462            | Beta-mannosidase;                                            | -0.03                                       | -0.02                          | 0.98             | 9.20                  |
| O43252            | Bifunctional 3'-phosphoadenosine 5'-phosphosulfate synth     | -0.49                                       | -0.07                          | 0.58             | 7.10                  |
| P07814            | Bifunctional glutamate/proline--tRNA ligase;                 | -0.03                                       | -0.01                          | 0.98             | 8.10                  |
| P31939            | Bifunctional purine biosynthesis protein PURH;               | -0.03                                       | -0.01                          | 0.98             | 24.80                 |
| Q9Y223            | Bifunctional UDP-N-acetylglucosamine 2-epimerase/N-ac        | 0.73                                        | 0.11                           | 0.43             | 1.90                  |
| P43251            | Biotinidase;                                                 | -0.12                                       | -0.07                          | 0.92             | 4.10                  |
| Q13867            | Bleomycin hydrolase;                                         | -0.84                                       | -0.16                          | 0.37             | 6.80                  |
| Q9H3K6            | BolA-like protein 2;                                         | -1.47                                       | -1.11                          | 0.30             | 51.20                 |
| P13497            | Bone morphogenetic protein 1;                                | -0.03                                       | -0.02                          | 0.98             | 7.10                  |
| P22003            | Bone morphogenetic protein 5;                                | 5.63                                        | 1.02                           | 0.00             | 2.20                  |
| Q9UQB8            | Brain-specific angiogenesis inhibitor 1-associated protein : | -0.40                                       | -0.13                          | 0.69             | 8.00                  |
| Q9P287            | BRCA2 and CDKN1A-interacting protein;                        | 0.00                                        | 0.00                           | 1.00             | 15.90                 |
| P11586            | C-1-tetrahydrofolate synthase, cytoplasmic;                  | -0.09                                       | -0.04                          | 0.94             | 22.60                 |
| P13500            | C-C motif chemokine 2;                                       | 1.38                                        | 0.17                           | 0.13             | 11.10                 |
| O60271            | C-Jun-amino-terminal kinase-interacting protein 4;           | -0.20                                       | -0.07                          | 0.84             | 3.10                  |
| P56545            | C-terminal-binding protein 2;                                | 0.31                                        | 0.05                           | 0.74             | 11.00                 |
| Q9UBG0            | C-type mannose receptor 2;                                   | -3.06                                       | -2.80                          | 0.06             | 4.40                  |
| P80162            | C-X-C motif chemokine 6;                                     | 1.54                                        | 0.14                           | 0.09             | 10.50                 |
| Q96EU7            | C1GALT1-specific chaperone 1;                                | 0.69                                        | 0.08                           | 0.45             | 4.10                  |
| P27708            | CAD protein;                                                 | 1.19                                        | 0.31                           | 0.22             | 2.60                  |
| P55290            | Cadherin-13;                                                 | -0.94                                       | -0.18                          | 0.31             | 3.80                  |
| P63098            | Calcineurin subunit B type 1;                                | 3.29                                        | 0.55                           | 0.00             | 5.90                  |
| Q9Y376            | Calcium-binding protein 39;                                  | -0.60                                       | -0.43                          | 0.66             | 15.50                 |
| Q9Y2V2            | Calcium-regulated heat stable protein 1;                     | 0.25                                        | 0.02                           | 0.78             | 10.90                 |
| Q13554            | Calcium/calmodulin-dependent protein kinase type II subu     | 0.12                                        | 0.02                           | 0.89             | 2.50                  |
| Q9HB71            | Calcyclin-binding protein;                                   | -0.29                                       | -0.20                          | 0.83             | 32.90                 |
| P62158            | Calmodulin;                                                  | 0.55                                        | 0.24                           | 0.62             | 14.10                 |
| P04632            | Calpain small subunit 1;                                     | -0.29                                       | -0.06                          | 0.76             | 8.60                  |
| P17655            | Calpain-2 catalytic subunit;                                 | -0.04                                       | -0.01                          | 0.96             | 7.30                  |
| Q99439            | Calponin-2;                                                  | -1.94                                       | -0.22                          | 0.03             | 3.60                  |
| Q15417            | Calponin-3;                                                  | 0.25                                        | 0.02                           | 0.78             | 6.40                  |
| P27797            | Calreticulin;                                                | 0.63                                        | 0.31                           | 0.58             | 15.60                 |
| P22676            | Calretinin;                                                  | 0.86                                        | 0.92                           | 0.63             | 16.20                 |
| O94985            | Calsyntenin-1;                                               | 0.66                                        | 0.25                           | 0.53             | 14.80                 |
| O43852            | Calumenin;                                                   | 1.38                                        | 0.47                           | 0.17             | 20.60                 |
| Q8NCH0            | Carbohydrate sulfotransferase 14;                            | 0.77                                        | 0.09                           | 0.40             | 15.70                 |

Table S1

| Uniprot accession | Name                                                       | Fold-change (log <sub>2</sub> ) of ASPAratio | Fold-change standard deviation | ASPAratio p-value | Sequence coverage (%) |
|-------------------|------------------------------------------------------------|----------------------------------------------|--------------------------------|-------------------|-----------------------|
| Q96DG6            | Carboxymethylenebutenolidase homolog;                      | 0.08                                         | 0.06                           | 0.95              | 11.00                 |
| Q9UI42            | Carboxypeptidase A4;                                       | -1.15                                        | -0.64                          | 0.33              | 13.10                 |
| O75718            | Cartilage-associated protein;                              | 1.20                                         | 0.08                           | 0.18              | 2.70                  |
| P68400            | Casein kinase II subunit alpha;                            | 4.03                                         | 0.42                           | 0.00              | 3.30                  |
| P19784            | Casein kinase II subunit alpha';                           | 2.62                                         | 0.35                           | 0.00              | 3.70                  |
| P04040            | Catalase;                                                  | -0.29                                        | -0.23                          | 0.84              | 9.10                  |
| P07858            | Cathepsin B;                                               | -0.60                                        | -0.22                          | 0.56              | 17.70                 |
| P07339            | Cathepsin D;                                               | 0.74                                         | 0.30                           | 0.49              | 21.60                 |
| P07711            | Cathepsin L1;                                              | 2.01                                         | 1.09                           | 0.09              | 15.60                 |
| Q9UBR2            | Cathepsin Z;                                               | 0.30                                         | 0.15                           | 0.80              | 10.20                 |
| P20645            | Cation-dependent mannose-6-phosphate receptor;             | -1.60                                        | -0.19                          | 0.08              | 5.10                  |
| P11717            | Cation-independent mannose-6-phosphate receptor;           | 0.60                                         | 0.16                           | 0.54              | 4.50                  |
| Q03135            | Caveolin-1;                                                | 0.21                                         | 0.02                           | 0.81              | 7.90                  |
| A5YKK6            | CCR4-NOT transcription complex subunit 1;                  | 1.73                                         | 0.98                           | 0.15              | 1.30                  |
| Q6YHK3            | CD109 antigen;                                             | 0.54                                         | 0.36                           | 0.68              | 17.00                 |
| Q13740            | CD166 antigen;                                             | 0.98                                         | 0.66                           | 0.46              | 19.00                 |
| Q9Y5K6            | CD2-associated protein;                                    | -0.97                                        | -0.11                          | 0.28              | 3.10                  |
| P16070            | CD44 antigen;                                              | -1.40                                        | -0.70                          | 0.22              | 7.70                  |
| P13987            | CD59 glycoprotein;                                         | 1.22                                         | 0.09                           | 0.18              | 9.40                  |
| P21926            | CD9 antigen;                                               | 0.69                                         | 0.28                           | 0.52              | 7.00                  |
| Q15642            | Cdc42-interacting protein 4;                               | -1.06                                        | -0.11                          | 0.25              | 3.30                  |
| Q8NFZ8            | Cell adhesion molecule 4;                                  | 0.37                                         | 0.60                           | 0.89              | 14.90                 |
| P60953            | Cell division control protein 42 homolog;                  | -1.40                                        | -0.33                          | 0.15              | 14.70                 |
| Q99459            | Cell division cycle 5-like protein;                        | -0.43                                        | -0.07                          | 0.64              | 2.20                  |
| Q99674            | Cell growth regulator with EF hand domain protein 1;       | 0.55                                         | 0.37                           | 0.68              | 12.30                 |
| Q9NX58            | Cell growth-regulating nucleolar protein;                  | -0.60                                        | -0.07                          | 0.50              | 2.60                  |
| P43121            | Cell surface glycoprotein MUC18;                           | 1.40                                         | 0.14                           | 0.12              | 1.90                  |
| P62633            | Cellular nucleic acid-binding protein;                     | -2.18                                        | -1.39                          | 0.08              | 22.00                 |
| O00299            | Chloride intracellular channel protein 1;                  | 0.19                                         | 0.05                           | 0.85              | 32.00                 |
| Q9Y696            | Chloride intracellular channel protein 4;                  | -0.67                                        | -0.35                          | 0.57              | 22.10                 |
| Q6UVK1            | Chondroitin sulfate proteoglycan 4;                        | 0.48                                         | 0.31                           | 0.72              | 5.30                  |
| P83916            | Chromobox protein homolog 1;                               | -0.29                                        | -0.02                          | 0.75              | 14.60                 |
| Q13185            | Chromobox protein homolog 3;                               | 0.18                                         | 0.09                           | 0.88              | 28.40                 |
| P45973            | Chromobox protein homolog 5;                               | -0.04                                        | -0.02                          | 0.96              | 12.60                 |
| O75390            | Citrate synthase, mitochondrial;                           | -0.01                                        | -0.01                          | 0.99              | 6.70                  |
| Q00610            | Clathrin heavy chain 1;                                    | 0.07                                         | 0.04                           | 0.95              | 17.30                 |
| P09497            | Clathrin light chain B;                                    | 0.03                                         | 0.02                           | 0.99              | 15.30                 |
| Q10570            | Cleavage and polyadenylation specificity factor subunit 1; | -0.12                                        | -0.04                          | 0.90              | 3.70                  |
| Q9UKF6            | Cleavage and polyadenylation specificity factor subunit 3; | -0.40                                        | -0.35                          | 0.80              | 3.90                  |
| O43809            | Cleavage and polyadenylation specificity factor subunit 5; | 0.55                                         | 0.35                           | 0.67              | 6.60                  |
| Q16630            | Cleavage and polyadenylation specificity factor subunit 6; | -0.43                                        | -0.24                          | 0.72              | 4.90                  |
| O75153            | Clustered mitochondria protein homolog;                    | 0.20                                         | 0.08                           | 0.85              | 2.50                  |
| P10909            | Clusterin;                                                 | 0.24                                         | 0.16                           | 0.86              | 25.80                 |
| Q14019            | Coactosin-like protein;                                    | -0.27                                        | -0.06                          | 0.78              | 31.00                 |
| P00742            | Coagulation factor X;                                      | 6.53                                         | 1.31                           | 0.00              | 3.90                  |
| P53621            | Coatomer subunit alpha;                                    | 0.44                                         | 0.13                           | 0.65              | 2.20                  |
| P53618            | Coatomer subunit beta;                                     | -0.76                                        | -0.45                          | 0.54              | 2.40                  |
| P35606            | Coatomer subunit beta';                                    | 0.26                                         | 0.04                           | 0.77              | 1.40                  |
| P48444            | Coatomer subunit delta;                                    | -0.29                                        | -0.15                          | 0.80              | 15.90                 |
| O14579            | Coatomer subunit epsilon;                                  | -0.84                                        | -0.06                          | 0.35              | 3.60                  |
| Q9Y678            | Coatomer subunit gamma-1;                                  | -0.36                                        | -0.08                          | 0.71              | 2.40                  |
| O43405            | Cochlin;                                                   | 3.05                                         | 1.81                           | 0.01              | 18.20                 |
| P23528            | Cofilin-1;                                                 | -0.12                                        | -0.03                          | 0.90              | 45.20                 |
| Q9Y281            | Cofilin-2;                                                 | -1.12                                        | -1.53                          | 0.61              | 18.70                 |
| Q8WVM7            | Cohesin subunit SA-1;                                      | 1.41                                         | 0.11                           | 0.12              | 0.70                  |
| Q86WR0            | Coiled-coil domain-containing protein 25;                  | -2.18                                        | -0.10                          | 0.02              | 6.20                  |
| O75534            | Cold shock domain-containing protein E1;                   | 0.31                                         | 0.10                           | 0.76              | 1.50                  |

Table S1

| Uniprot accession | Name                                                     | Fold-change (log <sub>2</sub> ) of ASPAratio | Fold-change standard deviation | ASPAratio p-value | Sequence coverage (%) |
|-------------------|----------------------------------------------------------|----------------------------------------------|--------------------------------|-------------------|-----------------------|
| Q14011            | Cold-inducible RNA-binding protein;                      | -1.43                                        | -1.74                          | 0.46              | 19.80                 |
| P12109            | Collagen alpha-1(VI) chain;                              | 1.94                                         | 0.50                           | 0.04              | 16.10                 |
| Q99715            | Collagen alpha-1(XII) chain;                             | -0.01                                        | 0.00                           | 0.99              | 4.80                  |
| P39060            | Collagen alpha-1(XVIII) chain;                           | 2.13                                         | 1.05                           | 0.06              | 5.60                  |
| P08123            | Collagen alpha-2(I) chain;                               | 2.99                                         | 3.26                           | 0.10              | 1.30                  |
| P05997            | Collagen alpha-2(V) chain;                               | 5.55                                         | 7.62                           | 0.01              | 2.70                  |
| P29400            | Collagen alpha-5(IV) chain;                              | 1.87                                         | 1.17                           | 0.14              | 1.90                  |
| A8TX70            | Collagen alpha-5(VI) chain;                              | 1.66                                         | 0.23                           | 0.07              | 0.40                  |
| Q6UXH8            | Collagen and calcium-binding EGF domain-containing prc   | 0.61                                         | 0.33                           | 0.60              | 7.10                  |
| P00736            | Complement C1r subcomponent;                             | 0.69                                         | 0.55                           | 0.64              | 7.70                  |
| P01024            | Complement C3;                                           | 1.61                                         | 0.77                           | 0.16              | 39.40                 |
| Q07021            | Complement component 1 Q subcomponent-binding prote      | 0.03                                         | 0.01                           | 0.98              | 7.10                  |
| P00751            | Complement factor B;                                     | 0.55                                         | 0.31                           | 0.65              | 11.30                 |
| P00746            | Complement factor D;                                     | 0.61                                         | 0.43                           | 0.65              | 33.20                 |
| P29279            | Connective tissue growth factor;                         | 0.24                                         | 0.36                           | 0.92              | 10.00                 |
| Q13098            | COP9 signalosome complex subunit 1;                      | -0.34                                        | -0.16                          | 0.76              | 4.50                  |
| P61201            | COP9 signalosome complex subunit 2;                      | -1.22                                        | -0.77                          | 0.34              | 14.20                 |
| Q9UNS2            | COP9 signalosome complex subunit 3;                      | -1.00                                        | -0.22                          | 0.29              | 10.20                 |
| Q9BT78            | COP9 signalosome complex subunit 4;                      | -0.79                                        | -0.29                          | 0.45              | 13.80                 |
| Q92905            | COP9 signalosome complex subunit 5;                      | -1.06                                        | -0.18                          | 0.25              | 8.70                  |
| Q7L5N1            | COP9 signalosome complex subunit 6;                      | -0.92                                        | -0.10                          | 0.32              | 11.30                 |
| Q99627            | COP9 signalosome complex subunit 8;                      | -0.76                                        | -0.05                          | 0.40              | 6.20                  |
| Q99829            | Copine-1;                                                | 1.02                                         | 1.17                           | 0.59              | 6.70                  |
| O75131            | Copine-3;                                                | -1.15                                        | -0.49                          | 0.28              | 6.30                  |
| Q9NTM9            | Copper homeostasis protein cutC homolog;                 | 0.63                                         | 0.09                           | 0.49              | 12.10                 |
| P36551            | Coproporphyrinogen-III oxidase, mitochondrial;           | -3.47                                        | -7.72                          | 0.30              | 10.60                 |
| O75367            | Core histone macro-H2A.1;                                | -0.89                                        | -0.15                          | 0.34              | 5.40                  |
| P31146            | Coronin-1A;                                              | 0.06                                         | 0.01                           | 0.95              | 3.70                  |
| Q9ULV4            | Coronin-1C;                                              | 0.15                                         | 0.04                           | 0.87              | 11.40                 |
| Q9P1F3            | Costars family protein ABRACL;                           | -2.18                                        | -0.50                          | 0.02              | 16.00                 |
| P12277            | Creatine kinase B-type;                                  | 3.22                                         | 6.74                           | 0.31              | 36.70                 |
| P46109            | Crk-like protein;                                        | 0.04                                         | 0.01                           | 0.97              | 11.90                 |
| Q13616            | Cullin-1;                                                | -1.64                                        | -0.46                          | 0.09              | 2.30                  |
| Q13617            | Cullin-2;                                                | -0.58                                        | -0.04                          | 0.52              | 1.70                  |
| Q13619            | Cullin-4A;                                               | -0.36                                        | -0.10                          | 0.71              | 7.60                  |
| Q13620            | Cullin-4B;                                               | 1.32                                         | 0.26                           | 0.16              | 6.60                  |
| Q86VP6            | Cullin-associated NEDD8-dissociated protein 1;           | -0.40                                        | -0.13                          | 0.69              | 23.70                 |
| P24941            | Cyclin-dependent kinase 2;                               | 6.59                                         | 1.50                           | 0.00              | 8.70                  |
| Q00534            | Cyclin-dependent kinase 6;                               | 0.08                                         | 0.06                           | 0.95              | 7.40                  |
| P61024            | Cyclin-dependent kinases regulatory subunit 1;           | 0.60                                         | 0.03                           | 0.51              | 12.70                 |
| P33552            | Cyclin-dependent kinases regulatory subunit 2;           | -0.07                                        | -0.01                          | 0.94              | 12.70                 |
| Q8ND76            | Cyclin-Y;                                                | 2.65                                         | 0.72                           | 0.01              | 4.40                  |
| P04080            | Cystatin-B;                                              | 0.83                                         | 0.09                           | 0.36              | 40.80                 |
| P01034            | Cystatin-C;                                              | 2.14                                         | 0.18                           | 0.02              | 18.50                 |
| Q9UHD1            | Cysteine and histidine-rich domain-containing protein 1; | -0.92                                        | -0.54                          | 0.46              | 11.70                 |
| P49589            | Cysteine--tRNA ligase, cytoplasmic;                      | -0.15                                        | -0.03                          | 0.88              | 8.40                  |
| Q9NZV1            | Cysteine-rich motor neuron 1 protein;                    | -0.20                                        | -0.06                          | 0.83              | 4.40                  |
| Q9P0S2            | Cytochrome c oxidase assembly protein COX16 homolog,     | 0.61                                         | 0.06                           | 0.49              | 13.20                 |
| P14854            | Cytochrome c oxidase subunit 6B1;                        | -1.94                                        | -0.22                          | 0.03              | 12.80                 |
| P21399            | Cytoplasmic aconitate hydratase;                         | -1.52                                        | -0.30                          | 0.11              | 5.10                  |
| Q14204            | Cytoplasmic dynein 1 heavy chain 1;                      | 0.11                                         | 0.11                           | 0.95              | 4.30                  |
| Q9Y6G9            | Cytoplasmic dynein 1 light intermediate chain 1;         | 0.08                                         | 0.01                           | 0.92              | 2.30                  |
| O43237            | Cytoplasmic dynein 1 light intermediate chain 2;         | 0.42                                         | 0.04                           | 0.64              | 3.00                  |
| Q7L576            | Cytoplasmic FMR1-interacting protein 1;                  | -0.84                                        | -0.49                          | 0.50              | 3.60                  |
| Q14008            | Cytoskeleton-associated protein 5;                       | -0.71                                        | -0.22                          | 0.47              | 3.90                  |
| P28838            | Cytosol aminopeptidase;                                  | -3.18                                        | -2.90                          | 0.04              | 10.20                 |
| O00154            | Cytosolic acyl coenzyme A thioester hydrolase;           | -0.64                                        | -0.43                          | 0.63              | 13.20                 |

Table S1

| Uniprot accession | Name                                                      | Fold-change (log <sub>2</sub> ) of ASPAratio | Fold-change standard deviation | ASPAratio p-value | Sequence coverage (%) |
|-------------------|-----------------------------------------------------------|----------------------------------------------|--------------------------------|-------------------|-----------------------|
| Q96KP4            | Cytosolic non-specific dipeptidase;                       | -0.09                                        | -0.06                          | 0.95              | 21.30                 |
| P49902            | Cytosolic purine 5'-nucleotidase;                         | -0.01                                        | 0.00                           | 0.99              | 1.60                  |
| O43175            | D-3-phosphoglycerate dehydrogenase;                       | -0.71                                        | -0.09                          | 0.43              | 5.10                  |
| P30046            | D-dopachrome decarboxylase;                               | 0.74                                         | 0.44                           | 0.55              | 28.80                 |
| Q8N163            | DBIRD complex subunit KIAA1967;                           | -2.06                                        | -0.34                          | 0.02              | 1.60                  |
| Q9UKG1            | DCC-interacting protein 13-alpha;                         | -0.67                                        | -0.12                          | 0.48              | 2.40                  |
| Q9H773            | dCTP pyrophosphatase 1;                                   | -1.12                                        | -0.73                          | 0.38              | 11.20                 |
| P13716            | Delta-aminolevulinic acid dehydratase;                    | 0.21                                         | 0.02                           | 0.81              | 5.80                  |
| O00115            | Deoxyribonuclease-2-alpha;                                | 0.71                                         | 0.15                           | 0.45              | 12.20                 |
| O43598            | Deoxyribonucleoside 5'-monophosphate N-glycosidase;       | -0.47                                        | -0.05                          | 0.60              | 9.80                  |
| P33316            | Deoxyuridine 5'-triphosphate nucleotidohydrolase, mitoch  | -0.27                                        | -0.11                          | 0.80              | 27.80                 |
| Q02487            | Desmocollin-2;                                            | -0.23                                        | -0.01                          | 0.80              | 2.20                  |
| Q14126            | Desmoglein-2;                                             | 0.33                                         | 0.06                           | 0.72              | 4.90                  |
| P60981            | Destrin;                                                  | -0.97                                        | -1.12                          | 0.61              | 19.40                 |
| Q9Y295            | Developmentally-regulated GTP-binding protein 1;          | -0.60                                        | -0.26                          | 0.58              | 10.60                 |
| Q01459            | Di-N-acetylchitobiase;                                    | -1.25                                        | -0.89                          | 0.36              | 8.60                  |
| Q9NR28            | Diablo homolog, mitochondrial;                            | -1.84                                        | -0.79                          | 0.10              | 10.00                 |
| O94907            | Dickkopf-related protein 1;                               | 2.06                                         | 0.92                           | 0.06              | 34.60                 |
| Q9UBP4            | Dickkopf-related protein 3;                               | 2.06                                         | 0.16                           | 0.02              | 6.30                  |
| P09622            | Dihydrolipoyl dehydrogenase, mitochondrial;               | -1.84                                        | -4.33                          | 0.60              | 9.60                  |
| P09417            | Dihydropteridine reductase;                               | -1.69                                        | -0.76                          | 0.12              | 23.40                 |
| Q16555            | Dihydropyrimidinase-related protein 2;                    | -1.32                                        | -1.42                          | 0.46              | 28.30                 |
| Q12882            | Dihydropyrimidine dehydrogenase [NADP(+)];                | 0.20                                         | 0.04                           | 0.83              | 2.10                  |
| P53634            | Dipeptidyl peptidase 1;                                   | 1.85                                         | 0.49                           | 0.06              | 17.30                 |
| Q9UHL4            | Dipeptidyl peptidase 2;                                   | 1.73                                         | 0.33                           | 0.06              | 15.70                 |
| Q9NY33            | Dipeptidyl peptidase 3;                                   | -0.81                                        | -0.30                          | 0.44              | 11.70                 |
| Q86TI2            | Dipeptidyl peptidase 9;                                   | 0.79                                         | 0.24                           | 0.42              | 2.50                  |
| O14672            | Disintegrin and metalloproteinase domain-containing prote | 0.86                                         | 0.29                           | 0.40              | 7.90                  |
| Q13444            | Disintegrin and metalloproteinase domain-containing prote | 0.88                                         | 0.62                           | 0.51              | 11.80                 |
| P78536            | Disintegrin and metalloproteinase domain-containing prote | 0.82                                         | 0.49                           | 0.51              | 4.10                  |
| Q13443            | Disintegrin and metalloproteinase domain-containing prote | 0.12                                         | 0.08                           | 0.92              | 3.10                  |
| Q16531            | DNA damage-binding protein 1;                             | -0.92                                        | -0.54                          | 0.46              | 13.60                 |
| Q92466            | DNA damage-binding protein 2;                             | -0.03                                        | -0.01                          | 0.97              | 4.40                  |
| O00273            | DNA fragmentation factor subunit alpha;                   | -0.40                                        | -0.32                          | 0.78              | 16.30                 |
| P18858            | DNA ligase 1;                                             | -1.00                                        | -2.72                          | 0.80              | 3.00                  |
| P06746            | DNA polymerase beta;                                      | -0.49                                        | -0.06                          | 0.58              | 3.30                  |
| P18887            | DNA repair protein XRCC1;                                 | -1.09                                        | -0.23                          | 0.25              | 2.20                  |
| Q9BRT9            | DNA replication complex GINS protein SLD5;                | -0.47                                        | -0.05                          | 0.60              | 6.30                  |
| P49736            | DNA replication licensing factor MCM2;                    | 0.55                                         | 0.33                           | 0.66              | 4.20                  |
| P25205            | DNA replication licensing factor MCM3;                    | 1.29                                         | 1.23                           | 0.43              | 6.20                  |
| P33992            | DNA replication licensing factor MCM5;                    | 1.60                                         | 1.21                           | 0.26              | 5.60                  |
| Q14566            | DNA replication licensing factor MCM6;                    | 0.84                                         | 0.53                           | 0.50              | 10.50                 |
| P33993            | DNA replication licensing factor MCM7;                    | 1.45                                         | 0.23                           | 0.11              | 1.40                  |
| P11387            | DNA topoisomerase 1;                                      | 0.65                                         | 1.00                           | 0.79              | 2.90                  |
| P27695            | DNA-(apurinic or apyrimidinic site) lyase;                | 0.55                                         | 0.30                           | 0.65              | 22.00                 |
| P78527            | DNA-dependent protein kinase catalytic subunit;           | 1.44                                         | 1.28                           | 0.36              | 1.30                  |
| P30876            | DNA-directed RNA polymerase II subunit RPB2;              | -0.12                                        | -0.01                          | 0.89              | 1.10                  |
| O15160            | DNA-directed RNA polymerases I and III subunit RPAC1;     | 0.64                                         | 0.12                           | 0.49              | 3.80                  |
| P52434            | DNA-directed RNA polymerases I, II, and III subunit RPA   | 0.24                                         | 0.03                           | 0.80              | 10.70                 |
| P31689            | DnaJ homolog subfamily A member 1;                        | 0.51                                         | 0.05                           | 0.57              | 3.30                  |
| O75937            | DnaJ homolog subfamily C member 8;                        | 0.00                                         | 0.00                           | 1.00              | 9.90                  |
| O95793            | Double-stranded RNA-binding protein Staufen homolog 1     | -0.40                                        | -0.30                          | 0.78              | 4.70                  |
| P55265            | Double-stranded RNA-specific adenosine deaminase;         | -0.76                                        | -0.67                          | 0.63              | 7.10                  |
| Q16643            | Drebrin;                                                  | 3.15                                         | 0.54                           | 0.00              | 3.10                  |
| P51452            | Dual specificity protein phosphatase 3;                   | -0.43                                        | -0.05                          | 0.64              | 12.40                 |
| Q14203            | Dynactin subunit 1;                                       | 0.69                                         | 0.05                           | 0.44              | 0.90                  |
| Q13561            | Dynactin subunit 2;                                       | 0.60                                         | 0.20                           | 0.56              | 10.70                 |



Table S1

| Uniprot accession | Name                                                        | Fold-change (log <sub>2</sub> ) of ASAPratio | Fold-change standard deviation | ASPARatio p-value | Sequence coverage (%) |
|-------------------|-------------------------------------------------------------|----------------------------------------------|--------------------------------|-------------------|-----------------------|
| Q96FJ2            | Dynein light chain 2, cytoplasmic;                          | -1.43                                        | -1.55                          | 0.42              | 57.30                 |
| Q9NP97            | Dynein light chain roadblock-type 1;                        | -1.47                                        | -1.52                          | 0.40              | 51.00                 |
| Q8IZA0            | Dyslexia-associated protein KIAA0319-like protein;          | 0.97                                         | 0.15                           | 0.29              | 1.60                  |
| Q14118            | Dystroglycan;                                               | 1.12                                         | 0.55                           | 0.33              | 20.60                 |
| Q9Y4X5            | E3 ubiquitin-protein ligase ARIH1;                          | -0.76                                        | -0.27                          | 0.47              | 2.00                  |
| Q9UNE7            | E3 ubiquitin-protein ligase CHIP;                           | -0.17                                        | -0.08                          | 0.88              | 8.90                  |
| Q99496            | E3 ubiquitin-protein ligase RING2;                          | 0.36                                         | 0.05                           | 0.70              | 3.60                  |
| Q5T4S7            | E3 ubiquitin-protein ligase UBR4;                           | -2.18                                        | -3.57                          | 0.38              | 0.70                  |
| Q14258            | E3 ubiquitin/ISG15 ligase TRIM25;                           | -1.09                                        | -1.30                          | 0.57              | 15.60                 |
| Q15075            | Early endosome antigen 1;                                   | 1.26                                         | 1.22                           | 0.44              | 2.80                  |
| O95834            | Echinoderm microtubule-associated protein-like 2;           | -0.45                                        | -0.12                          | 0.64              | 7.20                  |
| Q9HC35            | Echinoderm microtubule-associated protein-like 4;           | -0.43                                        | -0.36                          | 0.77              | 3.40                  |
| Q96C19            | EF-hand domain-containing protein D2;                       | 1.04                                         | 0.41                           | 0.33              | 15.40                 |
| O95967            | EGF-containing fibulin-like extracellular matrix protein 2; | -1.84                                        | -1.71                          | 0.26              | 8.80                  |
| Q9H4M9            | EH domain-containing protein 1;                             | -0.84                                        | -0.81                          | 0.61              | 12.40                 |
| Q9NZN4            | EH domain-containing protein 2;                             | -0.12                                        | -0.01                          | 0.89              | 3.90                  |
| Q15717            | ELAV-like protein 1;                                        | -0.36                                        | -0.10                          | 0.71              | 23.60                 |
| P68104            | Elongation factor 1-alpha 1;                                | -0.23                                        | -0.06                          | 0.81              | 20.10                 |
| Q05639            | Elongation factor 1-alpha 2;                                | 2.58                                         | 0.52                           | 0.01              | 12.50                 |
| P24534            | Elongation factor 1-beta;                                   | 0.15                                         | 0.03                           | 0.87              | 24.40                 |
| P29692            | Elongation factor 1-delta;                                  | -0.76                                        | -0.13                          | 0.42              | 22.10                 |
| P26641            | Elongation factor 1-gamma;                                  | -0.40                                        | -0.17                          | 0.71              | 18.10                 |
| P13639            | Elongation factor 2;                                        | -0.45                                        | -0.18                          | 0.67              | 23.20                 |
| P50402            | Emerin;                                                     | -0.67                                        | -0.04                          | 0.46              | 5.10                  |
| Q99961            | Endophilin-A2;                                              | 0.42                                         | 0.04                           | 0.64              | 2.30                  |
| Q9UKM7            | Endoplasmic reticulum mannosyl-oligosaccharide 1,2-alpha    | 1.62                                         | 0.42                           | 0.09              | 4.70                  |
| P30040            | Endoplasmic reticulum resident protein 29;                  | 0.77                                         | 0.17                           | 0.42              | 18.00                 |
| Q9BS26            | Endoplasmic reticulum resident protein 44;                  | 0.06                                         | 0.04                           | 0.97              | 7.90                  |
| P14625            | Endoplasmin;                                                | 1.52                                         | 0.84                           | 0.20              | 16.40                 |
| Q9UNN8            | Endothelial protein C receptor;                             | 0.75                                         | 0.21                           | 0.44              | 20.60                 |
| P84090            | Enhancer of rudimentary homolog;                            | -1.29                                        | -1.44                          | 0.48              | 26.90                 |
| Q9UHY7            | Enolase-phosphatase E1;                                     | -0.56                                        | -0.03                          | 0.54              | 4.60                  |
| P42126            | Enoyl-CoA delta isomerase 1, mitochondrial;                 | -1.12                                        | -0.37                          | 0.26              | 4.30                  |
| P30084            | Enoyl-CoA hydratase, mitochondrial;                         | 0.87                                         | 0.71                           | 0.55              | 11.70                 |
| P20827            | Ephrin-A1;                                                  | 0.82                                         | 0.18                           | 0.38              | 8.30                  |
| P52799            | Ephrin-B2;                                                  | -0.64                                        | -0.06                          | 0.48              | 4.80                  |
| P42566            | Epidermal growth factor receptor substrate 15;              | 0.55                                         | 0.23                           | 0.61              | 1.50                  |
| P00533            | Epidermal growth factor receptor;                           | -0.17                                        | -0.08                          | 0.88              | 7.40                  |
| Q9UHF1            | Epidermal growth factor-like protein 7;                     | 1.09                                         | 0.37                           | 0.28              | 16.80                 |
| P61916            | Epididymal secretory protein E1;                            | 0.00                                         | 0.00                           | 1.00              | 43.00                 |
| Q9Y2E5            | Epididymis-specific alpha-mannosidase;                      | -0.29                                        | -0.07                          | 0.76              | 2.50                  |
| Q96HE7            | ERO1-like protein alpha;                                    | 0.32                                         | 0.08                           | 0.74              | 3.00                  |
| P60842            | Eukaryotic initiation factor 4A-I;                          | 1.26                                         | 0.34                           | 0.20              | 24.40                 |
| Q14240            | Eukaryotic initiation factor 4A-II;                         | 0.07                                         | 0.03                           | 0.95              | 22.10                 |
| P38919            | Eukaryotic initiation factor 4A-III;                        | -0.45                                        | -0.12                          | 0.64              | 10.50                 |
| P15170            | Eukaryotic peptide chain release factor GTP-binding subu    | -0.47                                        | -0.24                          | 0.68              | 9.40                  |
| P62495            | Eukaryotic peptide chain release factor subunit 1;          | -0.69                                        | -0.27                          | 0.51              | 13.00                 |
| O14602            | Eukaryotic translation initiation factor 1A, Y-chromosoma   | -0.04                                        | 0.00                           | 0.96              | 6.90                  |
| O60739            | Eukaryotic translation initiation factor 1b;                | 0.21                                         | 0.01                           | 0.81              | 14.20                 |
| P05198            | Eukaryotic translation initiation factor 2 subunit 1;       | -0.03                                        | -0.02                          | 0.98              | 20.30                 |
| P20042            | Eukaryotic translation initiation factor 2 subunit 2;       | -0.32                                        | -1.59                          | 0.97              | 5.70                  |
| P41091            | Eukaryotic translation initiation factor 2 subunit 3;       | -0.04                                        | -0.02                          | 0.96              | 17.40                 |
| Q9BY44            | Eukaryotic translation initiation factor 2A;                | -2.00                                        | -2.24                          | 0.29              | 7.00                  |
| Q14152            | Eukaryotic translation initiation factor 3 subunit A;       | -0.32                                        | -0.10                          | 0.75              | 5.40                  |
| P55884            | Eukaryotic translation initiation factor 3 subunit B;       | 0.63                                         | 0.28                           | 0.57              | 12.00                 |
| Q99613            | Eukaryotic translation initiation factor 3 subunit C;       | -1.06                                        | -0.71                          | 0.42              | 8.80                  |
| O15371            | Eukaryotic translation initiation factor 3 subunit D;       | -0.56                                        | -0.30                          | 0.64              | 4.20                  |

Table S1

| Uniprot accession | Name                                                     | Fold-change (log <sub>2</sub> ) of ASPAratio | Fold-change standard deviation | ASPAratio p-value | Sequence coverage (%) |
|-------------------|----------------------------------------------------------|----------------------------------------------|--------------------------------|-------------------|-----------------------|
| P60228            | Eukaryotic translation initiation factor 3 subunit E;    | -0.60                                        | -0.27                          | 0.58              | 8.80                  |
| O00303            | Eukaryotic translation initiation factor 3 subunit F;    | -0.97                                        | -0.50                          | 0.40              | 18.80                 |
| O75821            | Eukaryotic translation initiation factor 3 subunit G;    | 0.37                                         | 0.03                           | 0.69              | 2.80                  |
| O15372            | Eukaryotic translation initiation factor 3 subunit H;    | -0.34                                        | -0.07                          | 0.72              | 6.00                  |
| Q13347            | Eukaryotic translation initiation factor 3 subunit I;    | -0.17                                        | -0.03                          | 0.86              | 16.00                 |
| O75822            | Eukaryotic translation initiation factor 3 subunit J;    | 0.04                                         | 0.00                           | 0.97              | 3.10                  |
| Q9UBQ5            | Eukaryotic translation initiation factor 3 subunit K;    | -0.11                                        | -0.01                          | 0.91              | 11.50                 |
| Q9Y262            | Eukaryotic translation initiation factor 3 subunit L;    | -0.94                                        | -0.69                          | 0.50              | 9.60                  |
| Q7L2H7            | Eukaryotic translation initiation factor 3 subunit M;    | -0.01                                        | -0.01                          | 0.99              | 16.00                 |
| Q04637            | Eukaryotic translation initiation factor 4 gamma 1;      | 0.24                                         | 0.13                           | 0.84              | 5.10                  |
| P23588            | Eukaryotic translation initiation factor 4B;             | -0.67                                        | -0.53                          | 0.65              | 7.40                  |
| P06730            | Eukaryotic translation initiation factor 4E;             | -0.64                                        | -0.26                          | 0.55              | 11.50                 |
| P63241            | Eukaryotic translation initiation factor 5A-1;           | -0.01                                        | -0.01                          | 0.99              | 19.00                 |
| O60841            | Eukaryotic translation initiation factor 5B;             | -0.81                                        | -0.47                          | 0.51              | 6.70                  |
| O00471            | Exocyst complex component 5;                             | 3.07                                         | 4.85                           | 0.21              | 4.70                  |
| Q15024            | Exosome complex component RRP42;                         | -0.01                                        | 0.00                           | 0.99              | 7.90                  |
| Q9UBQ6            | Exostosin-like 2;                                        | 0.59                                         | 0.47                           | 0.69              | 11.80                 |
| P55060            | Exportin-2;                                              | -0.34                                        | -0.27                          | 0.82              | 9.50                  |
| O43592            | Exportin-T;                                              | -0.76                                        | -0.68                          | 0.63              | 3.70                  |
| Q16610            | Extracellular matrix protein 1;                          | 1.18                                         | 0.62                           | 0.31              | 17.20                 |
| Q86XX4            | Extracellular matrix protein FRAS1;                      | 2.93                                         | 1.88                           | 0.02              | 2.10                  |
| Q8IWU5            | Extracellular sulfatase Sulf-2;                          | 0.51                                         | 0.20                           | 0.63              | 8.40                  |
| P08294            | Extracellular superoxide dismutase [Cu-Zn];              | -1.22                                        | -0.11                          | 0.18              | 5.40                  |
| P15311            | Ezrin;                                                   | -1.00                                        | -0.48                          | 0.37              | 21.20                 |
| P52907            | F-actin-capping protein subunit alpha-1;                 | -0.79                                        | -0.45                          | 0.52              | 40.90                 |
| P47755            | F-actin-capping protein subunit alpha-2;                 | -0.97                                        | -0.40                          | 0.36              | 22.00                 |
| P47756            | F-actin-capping protein subunit beta;                    | -0.60                                        | -0.24                          | 0.57              | 17.00                 |
| Q9BZK7            | F-box-like/WD repeat-containing protein TBL1XR1;         | -0.45                                        | -0.12                          | 0.64              | 7.40                  |
| Q9Y5B9            | FACT complex subunit SPT16;                              | 0.72                                         | 0.11                           | 0.43              | 4.10                  |
| Q08945            | FACT complex subunit SSRP1;                              | 0.00                                         | 0.00                           | 1.00              | 5.60                  |
| Q96AE4            | Far upstream element-binding protein 1;                  | -1.12                                        | -1.22                          | 0.53              | 16.00                 |
| Q92945            | Far upstream element-binding protein 2;                  | -1.06                                        | -0.60                          | 0.38              | 12.10                 |
| P14324            | Farnesyl pyrophosphate synthase;                         | -0.29                                        | -0.32                          | 0.88              | 16.90                 |
| Q9UNN5            | FAS-associated factor 1;                                 | -0.01                                        | 0.00                           | 0.99              | 1.70                  |
| Q16658            | Fascin;                                                  | 1.14                                         | 0.11                           | 0.21              | 5.70                  |
| P49327            | Fatty acid synthase;                                     | 0.48                                         | 0.21                           | 0.67              | 22.50                 |
| Q01469            | Fatty acid-binding protein, epidermal;                   | -1.25                                        | -1.13                          | 0.43              | 57.80                 |
| P05413            | Fatty acid-binding protein, heart;                       | -1.00                                        | -0.16                          | 0.27              | 10.50                 |
| Q96AC1            | Fermitin family homolog 2;                               | -0.07                                        | -0.07                          | 0.97              | 9.90                  |
| P02794            | Ferritin heavy chain;                                    | -1.52                                        | -0.95                          | 0.24              | 18.60                 |
| P02792            | Ferritin light chain;                                    | -0.38                                        | -0.05                          | 0.68              | 17.10                 |
| Q8N441            | Fibroblast growth factor receptor-like 1;                | 1.16                                         | 0.33                           | 0.24              | 5.00                  |
| Q14512            | Fibroblast growth factor-binding protein 1;              | 0.18                                         | 0.07                           | 0.87              | 28.20                 |
| P02751            | Fibronectin;                                             | 0.28                                         | 0.17                           | 0.82              | 1.50                  |
| Q9UBX5            | Fibulin-5;                                               | -0.27                                        | -0.01                          | 0.76              | 7.40                  |
| P21333            | Filamin-A;                                               | 0.37                                         | 0.21                           | 0.76              | 23.30                 |
| O75369            | Filamin-B;                                               | 0.24                                         | 0.15                           | 0.85              | 28.20                 |
| Q14315            | Filamin-C;                                               | 0.26                                         | 0.12                           | 0.81              | 15.80                 |
| P30043            | Flavin reductase (NADPH);                                | 0.48                                         | 0.06                           | 0.60              | 4.90                  |
| O95633            | Follistatin-related protein 3;                           | -0.18                                        | -0.16                          | 0.90              | 8.70                  |
| Q86VR8            | Four-jointed box protein 1;                              | 1.29                                         | 0.16                           | 0.16              | 5.30                  |
| P51114            | Fragile X mental retardation syndrome-related protein 1; | -0.04                                        | -0.03                          | 0.97              | 3.40                  |
| Q16595            | Frataxin, mitochondrial;                                 | 0.40                                         | 0.07                           | 0.66              | 8.10                  |
| P04075            | Fructose-bisphosphate aldolase A;                        | -0.97                                        | -0.59                          | 0.44              | 45.30                 |
| P09972            | Fructose-bisphosphate aldolase C;                        | -1.29                                        | -2.01                          | 0.60              | 33.20                 |
| P07954            | Fumarate hydratase, mitochondrial;                       | 0.90                                         | 0.45                           | 0.43              | 9.40                  |
| P16930            | Fumarylacetoacetase;                                     | -0.58                                        | -0.36                          | 0.65              | 7.60                  |

Table S1

| Uniprot accession | Name                                                    | Fold-change (log <sub>2</sub> ) of ASPAratio | Fold-change standard deviation | ASPAratio p-value | Sequence coverage (%) |
|-------------------|---------------------------------------------------------|----------------------------------------------|--------------------------------|-------------------|-----------------------|
| Q96GK7            | Fumarylacetoacetate hydrolase domain-containing protein | -0.54                                        | -0.33                          | 0.67              | 14.00                 |
| P09382            | Galectin-1;                                             | -0.94                                        | -0.38                          | 0.38              | 51.10                 |
| Q08380            | Galectin-3-binding protein;                             | 1.80                                         | 0.90                           | 0.12              | 30.60                 |
| P17931            | Galectin-3;                                             | -0.04                                        | 0.00                           | 0.96              | 22.80                 |
| P09104            | Gamma-enolase;                                          | -1.25                                        | -0.66                          | 0.29              | 6.50                  |
| Q92820            | Gamma-glutamyl hydrolase;                               | 0.69                                         | 0.17                           | 0.48              | 24.20                 |
| O75223            | Gamma-glutamylcyclotransferase;                         | 0.18                                         | 0.04                           | 0.86              | 16.50                 |
| P13284            | Gamma-interferon-inducible lysosomal thiol reductase;   | -0.81                                        | -1.48                          | 0.77              | 5.20                  |
| P17900            | Ganglioside GM2 activator;                              | -0.54                                        | -0.61                          | 0.78              | 14.00                 |
| Q9H488            | GDP-fucose protein O-fucosyltransferase 1;              | 0.82                                         | 0.08                           | 0.36              | 4.10                  |
| O60547            | GDP-mannose 4,6 dehydratase;                            | -1.69                                        | -0.27                          | 0.07              | 5.40                  |
| P06396            | Gelsolin;                                               | 0.56                                         | 0.21                           | 0.59              | 13.90                 |
| Q8TEQ6            | Gem-associated protein 5;                               | 0.55                                         | 0.57                           | 0.75              | 2.50                  |
| P78347            | General transcription factor II-I;                      | 0.60                                         | 0.37                           | 0.63              | 3.60                  |
| P35269            | General transcription factor IIF subunit 1;             | -0.56                                        | -0.07                          | 0.54              | 2.30                  |
| P13984            | General transcription factor IIF subunit 2;             | -0.23                                        | -0.02                          | 0.80              | 11.20                 |
| Q9NQX3            | Gephyrin;                                               | 3.04                                         | 0.18                           | 0.00              | 1.40                  |
| P60983            | Glia maturation factor beta;                            | -0.09                                        | -0.04                          | 0.94              | 13.40                 |
| P07093            | Glia-derived nexin;                                     | 0.91                                         | 0.35                           | 0.39              | 15.80                 |
| Q96EK6            | Glucosamine 6-phosphate N-acetyltransferase;            | -0.92                                        | -0.54                          | 0.46              | 17.90                 |
| P46926            | Glucosamine-6-phosphate isomerase 1;                    | -0.69                                        | -0.46                          | 0.60              | 24.60                 |
| P11413            | Glucose-6-phosphate 1-dehydrogenase;                    | -0.97                                        | -0.51                          | 0.41              | 10.50                 |
| P06744            | Glucose-6-phosphate isomerase;                          | -0.07                                        | -0.03                          | 0.95              | 24.90                 |
| P14314            | Glucosidase 2 subunit beta;                             | -5.64                                        | 0.00                           | 0.00              | 2.30                  |
| P04062            | Glucosylceramidase;                                     | 0.75                                         | 0.27                           | 0.47              | 14.00                 |
| P00367            | Glutamate dehydrogenase 1, mitochondrial;               | 0.65                                         | 0.07                           | 0.47              | 7.20                  |
| P48506            | Glutamate--cysteine ligase catalytic subunit;           | -0.92                                        | -0.07                          | 0.31              | 1.30                  |
| P48507            | Glutamate--cysteine ligase regulatory subunit;          | -0.81                                        | -0.36                          | 0.46              | 10.90                 |
| Q06210            | Glutamine--fructose-6-phosphate aminotransferase [isome | -0.34                                        | -0.19                          | 0.78              | 4.60                  |
| P47897            | Glutamine--tRNA ligase;                                 | -1.12                                        | -1.05                          | 0.49              | 12.60                 |
| O76003            | Glutaredoxin-3;                                         | 0.14                                         | 0.08                           | 0.91              | 14.60                 |
| Q86SX6            | Glutaredoxin-related protein 5, mitochondrial;          | 0.53                                         | 0.05                           | 0.56              | 7.00                  |
| P00390            | Glutathione reductase, mitochondrial;                   | 0.77                                         | 0.16                           | 0.41              | 2.90                  |
| Q9Y2Q3            | Glutathione S-transferase kappa 1;                      | -0.04                                        | -0.01                          | 0.96              | 4.90                  |
| P78417            | Glutathione S-transferase omega-1;                      | 0.37                                         | 0.09                           | 0.70              | 26.60                 |
| P09211            | Glutathione S-transferase P;                            | -1.15                                        | -1.36                          | 0.55              | 45.70                 |
| P48637            | Glutathione synthetase;                                 | -1.15                                        | -1.33                          | 0.54              | 14.30                 |
| P04406            | Glyceraldehyde-3-phosphate dehydrogenase;               | -0.92                                        | -0.50                          | 0.44              | 34.00                 |
| P41250            | Glycine--tRNA ligase;                                   | -0.15                                        | -0.11                          | 0.91              | 11.00                 |
| P11216            | Glycogen phosphorylase, brain form;                     | -2.18                                        | -1.99                          | 0.17              | 28.40                 |
| P06737            | Glycogen phosphorylase, liver form;                     | -0.20                                        | -0.09                          | 0.85              | 29.20                 |
| P46976            | Glycogenin-1;                                           | -0.56                                        | -0.24                          | 0.61              | 12.90                 |
| P30419            | Glycylpeptide N-tetradecanoyltransferase 1;             | -0.43                                        | -0.02                          | 0.63              | 2.20                  |
| Q9HC38            | Glyoxalase domain-containing protein 4;                 | -0.32                                        | -0.04                          | 0.73              | 17.30                 |
| P35052            | Glypican-1;                                             | 1.22                                         | 1.00                           | 0.41              | 30.30                 |
| P49915            | GMP synthase [glutamine-hydrolyzing];                   | 0.30                                         | 0.08                           | 0.76              | 11.10                 |
| Q8NBJ4            | Golgi membrane protein 1;                               | 0.31                                         | 0.08                           | 0.75              | 9.50                  |
| O95249            | Golgi SNAP receptor complex member 1;                   | 1.30                                         | 0.16                           | 0.15              | 4.80                  |
| P28799            | Granulins;                                              | 0.61                                         | 0.29                           | 0.58              | 16.90                 |
| Q8NCC3            | Group XV phospholipase A2;                              | 0.82                                         | 0.19                           | 0.39              | 13.60                 |
| P62993            | Growth factor receptor-bound protein 2;                 | -0.76                                        | -0.59                          | 0.60              | 20.70                 |
| P09341            | Growth-regulated alpha protein;                         | 0.75                                         | 0.25                           | 0.46              | 37.40                 |
| Q99988            | Growth/differentiation factor 15;                       | 1.55                                         | 1.03                           | 0.24              | 9.10                  |
| Q9HAV7            | GrpE protein homolog 1, mitochondrial;                  | -2.25                                        | -0.54                          | 0.02              | 5.10                  |
| P62826            | GTP-binding nuclear protein Ran;                        | -0.12                                        | -0.02                          | 0.89              | 31.00                 |
| Q9Y2T3            | Guanine deaminase;                                      | -0.71                                        | -0.28                          | 0.49              | 38.30                 |
| P62879            | Guanine nucleotide-binding protein G(I)/G(S)/G(T) subun | 0.11                                         | 0.06                           | 0.93              | 10.00                 |

Table S1

| Uniprot accession | Name                                                        | Fold-change (log <sub>2</sub> ) of ASAPratio | Fold-change standard deviation | ASPAratio p-value | Sequence coverage (%) |
|-------------------|-------------------------------------------------------------|----------------------------------------------|--------------------------------|-------------------|-----------------------|
| P38405            | Guanine nucleotide-binding protein G(olf) subunit alpha;    | 1.59                                         | 0.20                           | 0.08              | 3.10                  |
| P63244            | Guanine nucleotide-binding protein subunit beta-2-like 1;   | 0.04                                         | 0.01                           | 0.97              | 27.80                 |
| O60832            | H/ACA ribonucleoprotein complex subunit 4;                  | -1.15                                        | -1.05                          | 0.47              | 7.80                  |
| Q9H0R4            | Haloacid dehalogenase-like hydrolase domain-containing 1    | -1.32                                        | -0.20                          | 0.15              | 8.10                  |
| P48723            | Heat shock 70 kDa protein 13;                               | 2.07                                         | 0.81                           | 0.05              | 10.40                 |
| P08107            | Heat shock 70 kDa protein 1A/1B;                            | -0.45                                        | -0.17                          | 0.66              | 27.30                 |
| P34932            | Heat shock 70 kDa protein 4;                                | -1.00                                        | -0.90                          | 0.52              | 22.90                 |
| P11142            | Heat shock cognate 71 kDa protein;                          | -0.71                                        | -0.26                          | 0.49              | 41.30                 |
| Q92598            | Heat shock protein 105 kDa;                                 | 0.40                                         | 0.16                           | 0.70              | 10.30                 |
| Q12931            | Heat shock protein 75 kDa, mitochondrial;                   | 0.48                                         | 0.05                           | 0.60              | 1.30                  |
| P04792            | Heat shock protein beta-1;                                  | 0.45                                         | 0.11                           | 0.63              | 20.00                 |
| P07900            | Heat shock protein HSP 90-alpha;                            | -0.54                                        | -0.20                          | 0.61              | 40.60                 |
| P08238            | Heat shock protein HSP 90-beta;                             | 0.07                                         | 0.03                           | 0.94              | 32.90                 |
| P54652            | Heat shock-related 70 kDa protein 2;                        | 2.98                                         | 0.34                           | 0.00              | 14.70                 |
| Q9NRV9            | Heme-binding protein 1;                                     | 0.25                                         | 0.07                           | 0.80              | 8.50                  |
| P69905            | Hemoglobin subunit alpha;                                   | 0.31                                         | 0.03                           | 0.73              | 21.80                 |
| P02042            | Hemoglobin subunit delta;                                   | 0.25                                         | 0.07                           | 0.80              | 12.90                 |
| P08581            | Hepatocyte growth factor receptor;                          | 2.71                                         | 0.32                           | 0.00              | 0.90                  |
| O14964            | Hepatocyte growth factor-regulated tyrosine kinase substr   | -0.45                                        | -0.18                          | 0.67              | 3.00                  |
| Q7Z4V5            | Hepatoma-derived growth factor-related protein 2;           | -0.12                                        | -0.05                          | 0.91              | 5.40                  |
| P51858            | Hepatoma-derived growth factor;                             | -0.34                                        | -0.18                          | 0.77              | 17.90                 |
| Q99729            | Heterogeneous nuclear ribonucleoprotein A/B;                | -0.18                                        | -0.04                          | 0.85              | 11.70                 |
| Q13151            | Heterogeneous nuclear ribonucleoprotein A0;                 | 0.28                                         | 0.05                           | 0.77              | 11.50                 |
| P09651            | Heterogeneous nuclear ribonucleoprotein A1;                 | -0.11                                        | -0.01                          | 0.91              | 13.20                 |
| O60812            | Heterogeneous nuclear ribonucleoprotein C-like 1;           | 0.81                                         | 0.04                           | 0.37              | 12.60                 |
| O14979            | Heterogeneous nuclear ribonucleoprotein D-like;             | 0.14                                         | 0.03                           | 0.88              | 10.00                 |
| Q14103            | Heterogeneous nuclear ribonucleoprotein D0;                 | -0.38                                        | -0.08                          | 0.69              | 19.20                 |
| P52597            | Heterogeneous nuclear ribonucleoprotein F;                  | -0.45                                        | -0.35                          | 0.75              | 22.20                 |
| P31943            | Heterogeneous nuclear ribonucleoprotein H;                  | 0.37                                         | 0.23                           | 0.78              | 20.30                 |
| P31942            | Heterogeneous nuclear ribonucleoprotein H3;                 | 0.77                                         | 0.09                           | 0.40              | 8.40                  |
| P61978            | Heterogeneous nuclear ribonucleoprotein K;                  | 0.49                                         | 0.31                           | 0.71              | 29.20                 |
| Q8WVV9            | Heterogeneous nuclear ribonucleoprotein L-like;             | 1.12                                         | 0.13                           | 0.22              | 3.00                  |
| P52272            | Heterogeneous nuclear ribonucleoprotein M;                  | 0.61                                         | 0.25                           | 0.56              | 9.00                  |
| O60506            | Heterogeneous nuclear ribonucleoprotein Q;                  | 0.18                                         | 0.14                           | 0.90              | 28.30                 |
| O43390            | Heterogeneous nuclear ribonucleoprotein R;                  | -0.64                                        | -0.36                          | 0.60              | 21.20                 |
| Q00839            | Heterogeneous nuclear ribonucleoprotein U;                  | 0.14                                         | 0.04                           | 0.89              | 4.50                  |
| P22626            | Heterogeneous nuclear ribonucleoproteins A2/B1;             | 0.38                                         | 0.08                           | 0.69              | 17.00                 |
| P07910            | Heterogeneous nuclear ribonucleoproteins C1/C2;             | 0.37                                         | 0.03                           | 0.69              | 15.70                 |
| P09429            | High mobility group protein B1;                             | -1.15                                        | -0.38                          | 0.25              | 17.70                 |
| P26583            | High mobility group protein B2;                             | -0.97                                        | -0.11                          | 0.28              | 23.40                 |
| P37235            | Hippocalcin-like protein 1;                                 | -0.67                                        | -0.28                          | 0.54              | 19.70                 |
| P49773            | Histidine triad nucleotide-binding protein 1;               | -0.36                                        | -0.19                          | 0.76              | 29.40                 |
| Q9BX68            | Histidine triad nucleotide-binding protein 2, mitochondrial | -0.03                                        | -0.01                          | 0.97              | 21.50                 |
| P12081            | Histidine--tRNA ligase, cytoplasmic;                        | 0.20                                         | 0.03                           | 0.83              | 13.00                 |
| Q92769            | Histone deacetylase 2;                                      | 0.25                                         | 0.10                           | 0.81              | 6.40                  |
| P10412            | Histone H1.4;                                               | -0.29                                        | -0.13                          | 0.80              | 15.00                 |
| Q92522            | Histone H1x;                                                | -2.00                                        | -0.40                          | 0.03              | 7.00                  |
| P04908            | Histone H2A type 1-B/E;                                     | -1.60                                        | -0.24                          | 0.08              | 21.70                 |
| P0C0S5            | Histone H2A.Z;                                              | -0.64                                        | -0.03                          | 0.48              | 14.80                 |
| O60814            | Histone H2B type 1-K;                                       | -1.84                                        | -1.31                          | 0.18              | 26.20                 |
| P68431            | Histone H3.1;                                               | -0.54                                        | -0.20                          | 0.61              | 11.90                 |
| P62805            | Histone H4;                                                 | -2.18                                        | -0.70                          | 0.03              | 33.00                 |
| Q86X55            | Histone-arginine methyltransferase CARM1;                   | 0.11                                         | 0.06                           | 0.93              | 4.40                  |
| Q09028            | Histone-binding protein RBBP4;                              | -0.69                                        | -0.36                          | 0.55              | 17.40                 |
| P01892            | HLA class I histocompatibility antigen, A-2 alpha chain;    | 0.87                                         | 0.57                           | 0.50              | 26.60                 |
| P10314            | HLA class I histocompatibility antigen, A-32 alpha chain;   | 0.19                                         | 0.01                           | 0.83              | 20.00                 |
| P10321            | HLA class I histocompatibility antigen, Cw-7 alpha chain;   | 1.70                                         | 0.12                           | 0.06              | 29.50                 |

Table S1

| Uniprot accession | Name                                                              | Fold-change (log <sub>2</sub> ) of ASAPratio | Fold-change standard deviation | ASPARatio p-value | Sequence coverage (%) |
|-------------------|-------------------------------------------------------------------|----------------------------------------------|--------------------------------|-------------------|-----------------------|
| P51610            | Host cell factor 1;                                               | 0.42                                         | 0.07                           | 0.65              | 2.10                  |
| P50502            | Hsc70-interacting protein;                                        | -0.29                                        | -0.10                          | 0.78              | 20.90                 |
| Q16543            | Hsp90 co-chaperone Cdc37;                                         | -0.84                                        | -0.43                          | 0.47              | 13.50                 |
| Q96S86            | Hyaluronan and proteoglycan link protein 3;                       | 2.94                                         | 0.15                           | 0.00              | 2.80                  |
| Q16775            | Hydroxyacylglutathione hydrolase, mitochondrial;                  | -1.32                                        | -0.20                          | 0.15              | 13.30                 |
| Q01581            | Hydroxymethylglutaryl-CoA synthase, cytoplasmic;                  | 4.32                                         | 0.32                           | 0.00              | 4.20                  |
| P00492            | Hypoxanthine-guanine phosphoribosyltransferase;                   | -0.03                                        | -0.01                          | 0.98              | 45.00                 |
| Q9Y4L1            | Hypoxia up-regulated protein 1;                                   | 0.37                                         | 0.18                           | 0.75              | 2.50                  |
| Q8WZA9            | Immunity-related GTPase family Q protein;                         | 0.14                                         | 0.03                           | 0.88              | 2.20                  |
| Q969P0            | Immunoglobulin superfamily member 8;                              | -0.89                                        | -0.36                          | 0.41              | 5.70                  |
| O00505            | Importin subunit alpha-3;                                         | -0.12                                        | -0.02                          | 0.89              | 2.50                  |
| O00629            | Importin subunit alpha-4;                                         | -0.47                                        | -0.07                          | 0.60              | 5.20                  |
| Q14974            | Importin subunit beta-1;                                          | -0.18                                        | -0.13                          | 0.89              | 20.80                 |
| O00410            | Importin-5;                                                       | -0.49                                        | -0.38                          | 0.72              | 23.30                 |
| O95373            | Importin-7;                                                       | -0.49                                        | -0.18                          | 0.63              | 8.20                  |
| Q96P70            | Importin-9;                                                       | -0.40                                        | -0.32                          | 0.78              | 3.70                  |
| Q13308            | Inactive tyrosine-protein kinase 7;                               | -0.23                                        | -0.03                          | 0.80              | 8.40                  |
| Q15181            | Inorganic pyrophosphatase;                                        | -0.18                                        | -0.18                          | 0.91              | 32.90                 |
| Q9BY32            | Inosine triphosphate pyrophosphatase;                             | -1.32                                        | -0.13                          | 0.14              | 8.80                  |
| P12268            | Inosine-5'-monophosphate dehydrogenase 2;                         | 0.98                                         | 0.46                           | 0.38              | 10.70                 |
| P29218            | Inositol monophosphatase 1;                                       | -0.27                                        | -0.03                          | 0.77              | 3.60                  |
| Q9NPH2            | Inositol-3-phosphate synthase 1;                                  | 0.32                                         | 0.09                           | 0.74              | 7.90                  |
| P14735            | Insulin-degrading enzyme;                                         | -0.40                                        | -0.04                          | 0.65              | 4.70                  |
| Q9Y6M1            | Insulin-like growth factor 2 mRNA-binding protein 2;              | -0.32                                        | -0.04                          | 0.73              | 2.00                  |
| P01344            | Insulin-like growth factor II;                                    | 1.04                                         | 0.06                           | 0.25              | 5.00                  |
| P18065            | Insulin-like growth factor-binding protein 2;                     | 1.54                                         | 0.51                           | 0.13              | 26.20                 |
| P17936            | Insulin-like growth factor-binding protein 3;                     | 3.73                                         | 1.11                           | 0.00              | 23.40                 |
| P24592            | Insulin-like growth factor-binding protein 6;                     | 2.71                                         | 2.21                           | 0.07              | 11.70                 |
| P26006            | Integrin alpha-3;                                                 | 1.15                                         | 3.00                           | 0.77              | 2.10                  |
| P23229            | Integrin alpha-6;                                                 | 0.99                                         | 0.20                           | 0.30              | 1.00                  |
| P05556            | Integrin beta-1;                                                  | -0.60                                        | -0.44                          | 0.66              | 4.60                  |
| P16144            | Integrin beta-4;                                                  | -0.12                                        | -0.07                          | 0.92              | 9.00                  |
| O95965            | Integrin beta-like protein 1;                                     | -1.22                                        | -1.33                          | 0.50              | 14.00                 |
| Q9H0C8            | Integrin-linked kinase-associated serine/threonine phosphatase 1; | 0.28                                         | 0.03                           | 0.76              | 3.10                  |
| P05362            | Intercellular adhesion molecule 1;                                | -0.54                                        | -0.08                          | 0.56              | 5.30                  |
| P80217            | Interferon-induced 35 kDa protein;                                | -0.60                                        | -0.34                          | 0.62              | 7.30                  |
| Q12905            | Interleukin enhancer-binding factor 2;                            | -0.29                                        | -0.06                          | 0.76              | 25.40                 |
| Q12906            | Interleukin enhancer-binding factor 3;                            | -0.64                                        | -0.51                          | 0.66              | 18.80                 |
| P03956            | Interstitial collagenase;                                         | -0.76                                        | -1.08                          | 0.73              | 11.90                 |
| Q96CN7            | Isochorismatase domain-containing protein 1;                      | 0.53                                         | 0.22                           | 0.63              | 4.70                  |
| O75874            | Isocitrate dehydrogenase [NADP] cytoplasmic;                      | -0.94                                        | -0.85                          | 0.55              | 33.80                 |
| P41252            | Isoleucine--tRNA ligase, cytoplasmic;                             | -0.17                                        | -0.10                          | 0.90              | 8.30                  |
| P05783            | Keratin, type I cytoskeletal 18;                                  | 0.24                                         | 0.09                           | 0.82              | 28.60                 |
| P08727            | Keratin, type I cytoskeletal 19;                                  | 3.77                                         | 3.78                           | 0.03              | 15.80                 |
| P04264            | Keratin, type II cytoskeletal 1;                                  | 1.64                                         | 0.14                           | 0.07              | 1.40                  |
| P19013            | Keratin, type II cytoskeletal 4;                                  | -2.74                                        | -4.38                          | 0.26              | 3.90                  |
| P05787            | Keratin, type II cytoskeletal 8;                                  | 0.50                                         | 0.47                           | 0.76              | 38.70                 |
| Q07666            | KH domain-containing, RNA-binding, signal transduction;           | -0.17                                        | -0.10                          | 0.89              | 6.10                  |
| Q86UP2            | Kinectin;                                                         | -0.17                                        | -0.09                          | 0.89              | 5.30                  |
| Q07866            | Kinesin light chain 1;                                            | 1.54                                         | 1.46                           | 0.34              | 4.70                  |
| P33176            | Kinesin-1 heavy chain;                                            | -0.04                                        | -0.03                          | 0.97              | 5.70                  |
| Q6YP21            | Kynurenine--oxoglutarate transaminase 3;                          | -1.64                                        | -1.03                          | 0.19              | 10.80                 |
| Q9NRN7            | L-aminoacidopate-semialdehyde dehydrogenase-phosphopar            | -0.11                                        | -0.01                          | 0.91              | 2.90                  |
| P00338            | L-lactate dehydrogenase A chain;                                  | -1.00                                        | -0.32                          | 0.32              | 23.80                 |
| Q71RC2            | La-related protein 4;                                             | 2.28                                         | 0.36                           | 0.01              | 1.40                  |
| Q9NPC4            | Lactosylceramide 4-alpha-galactosyltransferase;                   | 0.66                                         | 0.15                           | 0.49              | 6.80                  |
| P20700            | Lamin-B1;                                                         | -0.11                                        | -0.06                          | 0.93              | 11.10                 |

Table S1

| Uniprot accession | Name                                                      | Fold-change (log <sub>2</sub> ) of ASPAratio | Fold-change standard deviation | ASPAratio p-value | Sequence coverage (%) |
|-------------------|-----------------------------------------------------------|----------------------------------------------|--------------------------------|-------------------|-----------------------|
| Q03252            | Lamin-B2;                                                 | -0.54                                        | -0.12                          | 0.58              | 5.70                  |
| P42167            | Lamina-associated polypeptide 2, isoforms beta/gamma;     | -0.29                                        | -0.16                          | 0.81              | 11.90                 |
| O15230            | Laminin subunit alpha-5;                                  | 1.50                                         | 1.55                           | 0.39              | 17.20                 |
| P07942            | Laminin subunit beta-1;                                   | 2.32                                         | 1.78                           | 0.10              | 9.80                  |
| P55268            | Laminin subunit beta-2;                                   | 2.53                                         | 1.87                           | 0.07              | 6.80                  |
| P11047            | Laminin subunit gamma-1;                                  | 1.16                                         | 1.92                           | 0.65              | 18.10                 |
| Q13753            | Laminin subunit gamma-2;                                  | 1.84                                         | 0.78                           | 0.09              | 4.40                  |
| O43813            | LanC-like protein 1;                                      | -1.94                                        | -0.22                          | 0.03              | 3.30                  |
| Q9NS86            | LanC-like protein 2;                                      | -1.32                                        | -0.53                          | 0.21              | 9.60                  |
| Q9NS15            | Latent-transforming growth factor beta-binding protein 3; | 1.61                                         | 0.82                           | 0.16              | 6.00                  |
| Q8N2S1            | Latent-transforming growth factor beta-binding protein 4; | -0.15                                        | -0.11                          | 0.91              | 7.60                  |
| Q14696            | LDLR chaperone MESD;                                      | -0.29                                        | -0.01                          | 0.75              | 4.30                  |
| Q99538            | Legumain;                                                 | 1.21                                         | 0.59                           | 0.28              | 15.20                 |
| Q9UIC8            | Leucine carboxyl methyltransferase 1;                     | -0.20                                        | -0.03                          | 0.82              | 2.40                  |
| P42704            | Leucine-rich PPR motif-containing protein, mitochondrial; | 0.14                                         | 0.05                           | 0.89              | 2.40                  |
| Q32MZ4            | Leucine-rich repeat flightless-interacting protein 1;     | -0.17                                        | -0.08                          | 0.88              | 2.50                  |
| Q8N6Y2            | Leucine-rich repeat-containing protein 17;                | -0.43                                        | -0.36                          | 0.77              | 6.30                  |
| Q8N1G4            | Leucine-rich repeat-containing protein 47;                | -0.40                                        | -0.17                          | 0.71              | 12.50                 |
| Q96AG4            | Leucine-rich repeat-containing protein 59;                | -0.58                                        | -0.23                          | 0.59              | 19.90                 |
| P30740            | Leukocyte elastase inhibitor;                             | -0.54                                        | -0.05                          | 0.56              | 3.20                  |
| P09960            | Leukotriene A-4 hydrolase;                                | -0.01                                        | -0.01                          | 0.99              | 37.80                 |
| Q9UPQ0            | LIM and calponin homology domains-containing protein 1    | 0.75                                         | 0.08                           | 0.41              | 1.60                  |
| P24666            | Low molecular weight phosphotyrosine protein phosphata;   | -0.36                                        | -0.03                          | 0.69              | 7.00                  |
| P01130            | Low-density lipoprotein receptor;                         | -0.58                                        | -0.21                          | 0.57              | 4.70                  |
| P05455            | Lupus La protein;                                         | 0.03                                         | 0.01                           | 0.98              | 16.40                 |
| P46736            | Lys-63-specific deubiquitinase BRCC36;                    | -1.69                                        | -1.53                          | 0.29              | 7.60                  |
| Q15046            | Lysine--tRNA ligase;                                      | -0.04                                        | -0.01                          | 0.96              | 6.40                  |
| P38571            | Lysosomal acid lipase/cholesteryl ester hydrolase;        | 2.43                                         | 0.29                           | 0.01              | 6.30                  |
| P11117            | Lysosomal acid phosphatase;                               | -2.40                                        | -0.38                          | 0.01              | 3.30                  |
| P10253            | Lysosomal alpha-glucosidase;                              | 0.73                                         | 0.13                           | 0.43              | 10.00                 |
| O00754            | Lysosomal alpha-mannosidase;                              | 1.32                                         | 0.75                           | 0.27              | 5.50                  |
| P42785            | Lysosomal Pro-X carboxypeptidase;                         | 0.90                                         | 0.57                           | 0.49              | 14.50                 |
| P10619            | Lysosomal protective protein;                             | 0.45                                         | 0.32                           | 0.73              | 16.70                 |
| Q9UMR5            | Lysosomal thioesterase PPT2;                              | 1.60                                         | 0.17                           | 0.08              | 13.60                 |
| P11279            | Lysosome-associated membrane glycoprotein 1;              | 4.04                                         | 0.27                           | 0.00              | 2.20                  |
| Q9Y4K0            | Lysyl oxidase homolog 2;                                  | 0.31                                         | 0.15                           | 0.79              | 9.20                  |
| Q96JB6            | Lysyl oxidase homolog 4;                                  | -0.49                                        | -0.15                          | 0.62              | 14.60                 |
| Q96C86            | m7GpppX diphosphatase;                                    | -0.69                                        | -0.17                          | 0.47              | 14.50                 |
| P09603            | Macrophage colony-stimulating factor 1;                   | 0.99                                         | 0.12                           | 0.27              | 2.90                  |
| P40121            | Macrophage-capping protein;                               | 0.28                                         | 0.06                           | 0.77              | 11.80                 |
| Q14764            | Major vault protein;                                      | -1.06                                        | -0.79                          | 0.45              | 2.70                  |
| P40925            | Malate dehydrogenase, cytoplasmic;                        | -0.69                                        | -0.37                          | 0.56              | 20.70                 |
| P40926            | Malate dehydrogenase, mitochondrial;                      | -0.69                                        | -0.35                          | 0.55              | 37.60                 |
| Q9ULC4            | Malignant T-cell-amplified sequence 1;                    | -1.32                                        | -0.40                          | 0.18              | 25.40                 |
| P33908            | Mannosyl-oligosaccharide 1,2-alpha-mannosidase IA;        | -2.64                                        | -0.50                          | 0.00              | 2.10                  |
| O60476            | Mannosyl-oligosaccharide 1,2-alpha-mannosidase IB;        | 0.26                                         | 0.17                           | 0.84              | 4.70                  |
| P43243            | Matrin-3;                                                 | -0.03                                        | -0.02                          | 0.98              | 8.50                  |
| Q99542            | Matrix metalloproteinase-19;                              | 2.02                                         | 0.63                           | 0.04              | 4.50                  |
| Q5JRA6            | Melanoma inhibitory activity protein 3;                   | 1.92                                         | 0.41                           | 0.04              | 0.60                  |
| P08582            | Melanotransferrin;                                        | 1.32                                         | 0.29                           | 0.16              | 1.60                  |
| P15529            | Membrane cofactor protein;                                | 0.37                                         | 0.24                           | 0.78              | 3.80                  |
| Q13421            | Mesothelin;                                               | 1.43                                         | 0.46                           | 0.15              | 33.20                 |
| P01033            | Metalloproteinase inhibitor 1;                            | 1.07                                         | 0.87                           | 0.47              | 36.70                 |
| P16035            | Metalloproteinase inhibitor 2;                            | 0.86                                         | 0.29                           | 0.40              | 17.30                 |
| Q13330            | Metastasis-associated protein MTA1;                       | 0.50                                         | 0.11                           | 0.60              | 3.50                  |
| O94776            | Metastasis-associated protein MTA2;                       | -0.81                                        | -0.17                          | 0.39              | 5.80                  |
| Q9UJH8            | Meteorin;                                                 | 0.82                                         | 0.12                           | 0.37              | 4.80                  |

Table S1

| Uniprot accession | Name                                                        | Fold-change (log <sub>2</sub> ) of ASPAratio | Fold-change standard deviation | ASPAratio p-value | Sequence coverage (%) |
|-------------------|-------------------------------------------------------------|----------------------------------------------|--------------------------------|-------------------|-----------------------|
| Q9NZL9            | Methionine adenosyltransferase 2 subunit beta;              | -0.49                                        | -0.23                          | 0.65              | 10.50                 |
| P16455            | Methylated-DNA--protein-cysteine methyltransferase;         | -1.00                                        | -0.52                          | 0.39              | 15.50                 |
| Q13361            | Microfibrillar-associated protein 5;                        | -1.47                                        | -0.16                          | 0.10              | 6.90                  |
| Q9UPN3            | Microtubule-actin cross-linking factor 1, isoforms 1/2/3/5; | -0.49                                        | -0.22                          | 0.65              | 0.90                  |
| Q96PK2            | Microtubule-actin cross-linking factor 1, isoforms 1/2/3/5; | 0.18                                         | 0.03                           | 0.85              | 1.00                  |
| P27816            | Microtubule-associated protein 4;                           | -0.49                                        | -0.36                          | 0.71              | 7.50                  |
| Q15691            | Microtubule-associated protein RP/EB family member 1;       | -0.03                                        | -0.01                          | 0.98              | 14.20                 |
| P21741            | Midkine;                                                    | 0.26                                         | 0.12                           | 0.81              | 21.70                 |
| Q7Z434            | Mitochondrial antiviral-signaling protein;                  | -0.27                                        | -0.07                          | 0.78              | 2.20                  |
| Q16891            | Mitochondrial inner membrane protein;                       | 0.53                                         | 0.54                           | 0.76              | 7.00                  |
| Q9UJ68            | Mitochondrial peptide methionine sulfoxide reductase;       | 0.81                                         | 0.11                           | 0.38              | 6.40                  |
| Q10713            | Mitochondrial-processing peptidase subunit alpha;           | -1.74                                        | -0.17                          | 0.05              | 2.10                  |
| P28482            | Mitogen-activated protein kinase 1;                         | -0.71                                        | -0.48                          | 0.59              | 18.90                 |
| Q16539            | Mitogen-activated protein kinase 14;                        | 0.55                                         | 0.23                           | 0.61              | 7.80                  |
| P45983            | Mitogen-activated protein kinase 8;                         | -0.79                                        | -0.16                          | 0.41              | 2.40                  |
| O43684            | Mitotic checkpoint protein BUB3;                            | -0.36                                        | -0.03                          | 0.69              | 8.20                  |
| Q7L9L4            | MOB kinase activator 1B;                                    | -0.47                                        | -0.15                          | 0.63              | 16.20                 |
| Q9Y3A3            | MOB-like protein phocein;                                   | -0.84                                        | -0.08                          | 0.35              | 6.20                  |
| P26038            | Moesin;                                                     | 2.37                                         | 1.79                           | 0.09              | 16.80                 |
| P53985            | Monocarboxylate transporter 1;                              | 0.72                                         | 0.06                           | 0.42              | 2.40                  |
| Q9H7C9            | Mth938 domain-containing protein;                           | -3.06                                        | -0.77                          | 0.00              | 13.10                 |
| P98088            | Mucin-5AC;                                                  | -3.18                                        | -7.53                          | 0.36              | 1.20                  |
| P22234            | Multifunctional protein ADE2;                               | 0.86                                         | 0.50                           | 0.49              | 22.80                 |
| Q9UNW1            | Multiple inositol polyphosphate phosphatase 1;              | 2.36                                         | 1.52                           | 0.07              | 12.10                 |
| Q9NZM1            | Myoferlin;                                                  | -0.47                                        | -0.09                          | 0.61              | 1.80                  |
| P12829            | Myosin light chain 4;                                       | 7.42                                         | 1.01                           | 0.00              | 6.60                  |
| P60660            | Myosin light polypeptide 6;                                 | -0.23                                        | -0.05                          | 0.81              | 37.70                 |
| Q6WCQ1            | Myosin phosphatase Rho-interacting protein;                 | -1.47                                        | -0.70                          | 0.19              | 2.20                  |
| O14950            | Myosin regulatory light chain 12B;                          | 0.06                                         | 0.01                           | 0.95              | 23.40                 |
| P35579            | Myosin-9;                                                   | -0.43                                        | -0.33                          | 0.76              | 12.20                 |
| P58546            | Myotrophin;                                                 | -0.18                                        | -0.02                          | 0.84              | 20.30                 |
| P29966            | Myristoylated alanine-rich C-kinase substrate;              | -6.64                                        | 0.00                           | 0.00              | 5.70                  |
| P34059            | N-acetylgalactosamine-6-sulfatase;                          | 0.92                                         | 0.93                           | 0.59              | 8.80                  |
| Q86SF2            | N-acetylgalactosaminyltransferase 7;                        | 3.79                                         | 0.22                           | 0.00              | 1.70                  |
| Q9UJJ9            | N-acetylglucosamine-1-phosphotransferase subunit gamma;     | 1.54                                         | 0.38                           | 0.11              | 17.70                 |
| P15586            | N-acetylglucosamine-6-sulfatase;                            | 0.25                                         | 0.12                           | 0.83              | 13.80                 |
| O43505            | N-acetyllactosaminide beta-1,3-N-acetylglucosaminyltrans;   | 0.50                                         | 0.29                           | 0.68              | 14.70                 |
| P41227            | N-alpha-acetyltransferase 10;                               | 0.31                                         | 0.08                           | 0.75              | 19.60                 |
| P61599            | N-alpha-acetyltransferase 20;                               | 0.53                                         | 0.04                           | 0.56              | 8.40                  |
| Q14CX7            | N-alpha-acetyltransferase 25, NatB auxiliary subunit;       | 0.49                                         | 0.39                           | 0.74              | 7.20                  |
| O95777            | N-alpha-acetyltransferase 38, NatC auxiliary subunit;       | -0.54                                        | -0.16                          | 0.60              | 36.50                 |
| Q9GZZ1            | N-alpha-acetyltransferase 50;                               | 0.64                                         | 0.10                           | 0.48              | 12.40                 |
| Q13287            | N-myc-interactor;                                           | -0.92                                        | -0.43                          | 0.42              | 9.80                  |
| P20933            | N(4)-(beta-N-acetylglucosaminyl)-L-asparaginase;            | 1.13                                         | 0.58                           | 0.33              | 6.40                  |
| O94760            | N(G),N(G)-dimethylarginine dimethylaminohydrolase 1;        | -0.04                                        | -0.01                          | 0.96              | 14.00                 |
| O95865            | N(G),N(G)-dimethylarginine dimethylaminohydrolase 2;        | 1.43                                         | 0.15                           | 0.11              | 10.50                 |
| O14745            | Na(+)/H(+) exchange regulatory cofactor NHE-RF1;            | -0.29                                        | -0.07                          | 0.76              | 21.20                 |
| P15559            | NAD(P)H dehydrogenase [quinone] 1;                          | -0.17                                        | -0.05                          | 0.86              | 8.40                  |
| Q8NCW5            | NAD(P)H-hydrate epimerase;                                  | -0.69                                        | -0.05                          | 0.44              | 14.20                 |
| O43181            | NADH dehydrogenase [ubiquinone] iron-sulfur protein 4,      | -1.15                                        | -0.15                          | 0.20              | 8.60                  |
| P48163            | NADP-dependent malic enzyme;                                | -0.71                                        | -0.25                          | 0.48              | 9.80                  |
| O43847            | Nardilysin;                                                 | 0.03                                         | 0.02                           | 0.99              | 4.60                  |
| Q13765            | Nascent polypeptide-associated complex subunit alpha;       | -0.49                                        | -0.29                          | 0.68              | 25.60                 |
| Q9Y2A7            | Nck-associated protein 1;                                   | -0.84                                        | -0.45                          | 0.47              | 2.70                  |
| Q8TBC4            | NEDD8-activating enzyme E1 catalytic subunit;               | -0.17                                        | -0.05                          | 0.87              | 3.90                  |
| Q13564            | NEDD8-activating enzyme E1 regulatory subunit;              | -0.84                                        | -0.12                          | 0.36              | 6.40                  |
| P61081            | NEDD8-conjugating enzyme Ubc12;                             | -2.06                                        | -1.03                          | 0.07              | 31.10                 |

Table S1

| Uniprot accession | Name                                                 | Fold-change (log <sub>2</sub> ) of ASAPratio | Fold-change standard deviation | ASAPratio p-value | Sequence coverage (%) |
|-------------------|------------------------------------------------------|----------------------------------------------|--------------------------------|-------------------|-----------------------|
| Q8WX92            | Negative elongation factor B;                        | -1.06                                        | -0.18                          | 0.25              | 2.10                  |
| Q92859            | Neogenin;                                            | -2.74                                        | -3.83                          | 0.22              | 2.10                  |
| Q9UMX5            | Neudesin;                                            | 0.88                                         | 0.50                           | 0.47              | 37.20                 |
| P32004            | Neural cell adhesion molecule L1;                    | 2.18                                         | 1.04                           | 0.05              | 7.00                  |
| Q09666            | Neuroblast differentiation-associated protein AHNAK; | 1.13                                         | 0.83                           | 0.41              | 8.40                  |
| Q9BYT8            | Neurolysin, mitochondrial;                           | -0.34                                        | -0.13                          | 0.75              | 5.30                  |
| O14786            | Neuropilin-1;                                        | -0.56                                        | -0.05                          | 0.54              | 1.40                  |
| O15240            | Neurosecretory protein VGF;                          | 0.04                                         | 0.01                           | 0.97              | 9.30                  |
| Q14697            | Neutral alpha-glucosidase AB;                        | 0.71                                         | 0.22                           | 0.48              | 2.40                  |
| Q15758            | Neutral amino acid transporter B(0);                 | 0.86                                         | 0.18                           | 0.37              | 3.90                  |
| P55769            | NHP2-like protein 1;                                 | 0.06                                         | 0.00                           | 0.95              | 8.60                  |
| Q96TA1            | Niban-like protein 1;                                | -0.60                                        | -0.26                          | 0.58              | 5.60                  |
| P43490            | Nicotinamide phosphoribosyltransferase;              | -0.69                                        | -0.21                          | 0.49              | 26.30                 |
| Q6XQN6            | Nicotinate phosphoribosyltransferase;                | 0.32                                         | 0.05                           | 0.73              | 3.30                  |
| Q9GZT8            | NIF3-like protein 1;                                 | -0.47                                        | -0.05                          | 0.60              | 2.70                  |
| Q9Y2I1            | Nischarin;                                           | -0.81                                        | -0.13                          | 0.38              | 0.80                  |
| Q9Y314            | Nitric oxide synthase-interacting protein;           | 1.43                                         | 0.16                           | 0.12              | 3.70                  |
| Q86X76            | Nitrilase homolog 1;                                 | -0.17                                        | -0.01                          | 0.85              | 4.60                  |
| Q9BZM5            | NKG2D ligand 2;                                      | 0.74                                         | 0.10                           | 0.42              | 14.20                 |
| Q9UNZ2            | NSFL1 cofactor p47;                                  | -1.09                                        | -1.44                          | 0.60              | 20.30                 |
| P49321            | Nuclear autoantigenic sperm protein;                 | -0.09                                        | -0.02                          | 0.93              | 6.50                  |
| Q09161            | Nuclear cap-binding protein subunit 1;               | -1.06                                        | -0.95                          | 0.50              | 5.10                  |
| Q00653            | Nuclear factor NF-kappa-B p100 subunit;              | 1.95                                         | 0.44                           | 0.04              | 1.30                  |
| Q9Y266            | Nuclear migration protein nudC;                      | -0.79                                        | -0.39                          | 0.49              | 13.90                 |
| Q14980            | Nuclear mitotic apparatus protein 1;                 | -0.76                                        | -0.65                          | 0.62              | 4.30                  |
| Q9UKX7            | Nuclear pore complex protein Nup50;                  | -1.64                                        | -0.15                          | 0.07              | 3.20                  |
| Q9UHY1            | Nuclear receptor-binding protein;                    | 0.92                                         | 0.11                           | 0.31              | 2.60                  |
| P61970            | Nuclear transport factor 2;                          | -1.25                                        | -0.89                          | 0.36              | 29.10                 |
| P67809            | Nuclease-sensitive element-binding protein 1;        | 0.43                                         | 0.07                           | 0.64              | 17.00                 |
| Q02818            | Nucleobindin-1;                                      | 1.33                                         | 0.26                           | 0.16              | 31.70                 |
| Q14978            | Nucleolar and coiled-body phosphoprotein 1;          | -2.40                                        | -1.39                          | 0.05              | 2.40                  |
| O00567            | Nucleolar protein 56;                                | 0.11                                         | 0.04                           | 0.92              | 3.90                  |
| Q9NR30            | Nucleolar RNA helicase 2;                            | 1.50                                         | 0.85                           | 0.22              | 12.10                 |
| P19338            | Nucleolin;                                           | 0.14                                         | 0.06                           | 0.90              | 21.40                 |
| Q01085            | Nucleolysin TIAR;                                    | -0.64                                        | -0.10                          | 0.49              | 4.80                  |
| P06748            | Nucleophosmin;                                       | -0.32                                        | -0.06                          | 0.74              | 23.50                 |
| P12270            | Nucleoprotein TPR;                                   | -0.09                                        | -0.03                          | 0.93              | 1.40                  |
| P15531            | Nucleoside diphosphate kinase A;                     | 0.64                                         | 0.13                           | 0.50              | 57.20                 |
| P0C025            | Nucleoside diphosphate-linked moiety X motif 17;     | -2.00                                        | -0.72                          | 0.05              | 7.60                  |
| P55209            | Nucleosome assembly protein 1-like 1;                | 0.43                                         | 0.24                           | 0.72              | 14.30                 |
| Q99733            | Nucleosome assembly protein 1-like 4;                | -0.40                                        | -0.12                          | 0.68              | 7.20                  |
| Q9NTK5            | Obg-like ATPase 1;                                   | -0.38                                        | -0.26                          | 0.77              | 18.70                 |
| Q8NH19            | Olfactory receptor 10AG1;                            | -0.17                                        | -0.03                          | 0.86              | 3.00                  |
| Q9NQR4            | Omega-amidase NIT2;                                  | -0.18                                        | -0.01                          | 0.84              | 4.00                  |
| Q99650            | Oncostatin-M-specific receptor subunit beta;         | 2.13                                         | 0.66                           | 0.03              | 2.10                  |
| Q92882            | Osteoclast-stimulating factor 1;                     | -2.74                                        | -0.18                          | 0.00              | 18.20                 |
| Q86UD1            | Out at first protein homolog;                        | 1.04                                         | 0.64                           | 0.41              | 8.40                  |
| Q9BXW6            | Oxysterol-binding protein-related protein 1;         | -1.06                                        | -0.18                          | 0.25              | 1.40                  |
| Q9NWT1            | p21-activated protein kinase-interacting protein 1;  | -1.74                                        | -0.17                          | 0.05              | 2.80                  |
| P50897            | Palmitoyl-protein thioesterase 1;                    | 0.77                                         | 0.47                           | 0.54              | 29.70                 |
| P20962            | Parathyrosin;                                        | -0.38                                        | -0.04                          | 0.67              | 10.80                 |
| P49023            | Paxillin;                                            | -1.69                                        | -1.42                          | 0.26              | 3.90                  |
| O75475            | PC4 and SFRS1-interacting protein;                   | -0.79                                        | -0.87                          | 0.67              | 7.40                  |
| Q5JVF3            | PCI domain-containing protein 2;                     | 1.91                                         | 0.24                           | 0.04              | 4.00                  |
| Q96JY6            | PDZ and LIM domain protein 2;                        | 1.07                                         | 0.15                           | 0.24              | 2.80                  |
| Q96HC4            | PDZ and LIM domain protein 5;                        | -0.56                                        | -0.82                          | 0.81              | 8.10                  |
| Q9NR12            | PDZ and LIM domain protein 7;                        | -0.92                                        | -0.62                          | 0.49              | 4.80                  |



Table S1

| Uniprot accession | Name                                                         | Fold-change (log <sub>2</sub> ) of ASPAratio | Fold-change standard deviation | ASPAratio p-value | Sequence coverage (%) |
|-------------------|--------------------------------------------------------------|----------------------------------------------|--------------------------------|-------------------|-----------------------|
| P26022            | Pentraxin-related protein PTX3;                              | 3.52                                         | 2.42                           | 0.01              | 21.00                 |
| Q8IYS1            | Peptidase M20 domain-containing protein 2;                   | 3.00                                         | 0.32                           | 0.00              | 3.00                  |
| P19021            | Peptidyl-glycine alpha-amidating monooxygenase;              | -0.04                                        | -0.02                          | 0.96              | 13.40                 |
| P62937            | Peptidyl-prolyl cis-trans isomerase A;                       | -1.32                                        | -1.42                          | 0.46              | 46.70                 |
| P23284            | Peptidyl-prolyl cis-trans isomerase B;                       | -0.17                                        | -0.09                          | 0.89              | 31.50                 |
| Q08752            | Peptidyl-prolyl cis-trans isomerase D;                       | 0.08                                         | 0.01                           | 0.92              | 2.40                  |
| P62942            | Peptidyl-prolyl cis-trans isomerase FKBP1A;                  | -0.49                                        | -0.04                          | 0.58              | 27.80                 |
| Q00688            | Peptidyl-prolyl cis-trans isomerase FKBP3;                   | 1.04                                         | 0.26                           | 0.28              | 14.70                 |
| Q02790            | Peptidyl-prolyl cis-trans isomerase FKBP4;                   | -0.60                                        | -0.63                          | 0.73              | 27.50                 |
| Q9Y3C6            | Peptidyl-prolyl cis-trans isomerase-like 1;                  | -0.01                                        | 0.00                           | 0.99              | 15.10                 |
| Q96BP3            | Peptidylprolyl isomerase domain and WD repeat-containin      | -0.12                                        | -0.04                          | 0.90              | 1.50                  |
| O60664            | Perilipin-3;                                                 | -0.79                                        | -0.61                          | 0.58              | 12.20                 |
| O14936            | Peripheral plasma membrane protein CASK;                     | -1.64                                        | -0.31                          | 0.08              | 2.80                  |
| Q06830            | Peroxiredoxin-1;                                             | -0.29                                        | -0.07                          | 0.76              | 41.20                 |
| P32119            | Peroxiredoxin-2;                                             | -1.47                                        | -0.21                          | 0.11              | 31.80                 |
| Q13162            | Peroxiredoxin-4;                                             | 0.37                                         | 0.09                           | 0.70              | 15.50                 |
| P30044            | Peroxiredoxin-5, mitochondrial;                              | -0.09                                        | -0.01                          | 0.92              | 23.80                 |
| P30041            | Peroxiredoxin-6;                                             | -0.18                                        | -0.19                          | 0.92              | 34.80                 |
| Q8WW12            | PEST proteolytic signal-containing nuclear protein;          | 0.78                                         | 0.16                           | 0.41              | 22.50                 |
| Q9Y285            | Phenylalanine--tRNA ligase alpha subunit;                    | 0.08                                         | 0.01                           | 0.92              | 2.60                  |
| Q9NSD9            | Phenylalanine--tRNA ligase beta subunit;                     | 0.07                                         | 0.02                           | 0.94              | 16.00                 |
| P30086            | Phosphatidylethanolamine-binding protein 1;                  | -0.60                                        | -0.15                          | 0.53              | 51.90                 |
| Q00169            | Phosphatidylinositol transfer protein alpha isoform;         | 0.38                                         | 0.05                           | 0.68              | 7.80                  |
| P48739            | Phosphatidylinositol transfer protein beta isoform;          | -0.07                                        | -0.01                          | 0.94              | 13.70                 |
| Q13492            | Phosphatidylinositol-binding clathrin assembly protein;      | -0.45                                        | -0.05                          | 0.62              | 2.30                  |
| P36871            | Phosphoglucomutase-1;                                        | -3.32                                        | -2.33                          | 0.02              | 8.90                  |
| Q96G03            | Phosphoglucomutase-2;                                        | -2.25                                        | -2.25                          | 0.19              | 6.00                  |
| P00558            | Phosphoglycerate kinase 1;                                   | -1.12                                        | -0.73                          | 0.38              | 55.40                 |
| P18669            | Phosphoglycerate mutase 1;                                   | -0.20                                        | -0.06                          | 0.84              | 35.40                 |
| A6NDG6            | Phosphoglycolate phosphatase;                                | -0.84                                        | -0.61                          | 0.54              | 16.20                 |
| Q6P4A8            | Phospholipase B-like 1;                                      | 1.44                                         | 0.11                           | 0.11              | 6.10                  |
| P55058            | Phospholipid transfer protein;                               | 2.13                                         | 0.54                           | 0.03              | 30.80                 |
| O15305            | Phosphomannomutase 2;                                        | -0.54                                        | -0.44                          | 0.72              | 14.20                 |
| O60256            | Phosphoribosyl pyrophosphate synthase-associated proteir     | -0.54                                        | -0.57                          | 0.77              | 11.40                 |
| O15067            | Phosphoribosylformylglycinamide synthase;                    | 0.84                                         | 0.59                           | 0.53              | 3.20                  |
| Q9Y617            | Phosphoserine aminotransferase;                              | 1.41                                         | 0.76                           | 0.23              | 39.70                 |
| P78330            | Phosphoserine phosphatase;                                   | -0.69                                        | -0.59                          | 0.65              | 24.90                 |
| P36955            | Pigment epithelium-derived factor;                           | 3.83                                         | 3.05                           | 0.01              | 23.20                 |
| Q9H307            | Pinin;                                                       | -0.03                                        | -0.01                          | 0.97              | 2.40                  |
| Q9GZP4            | PITH domain-containing protein 1;                            | 0.33                                         | 0.16                           | 0.76              | 19.00                 |
| Q9BTY2            | Plasma alpha-L-fucosidase;                                   | 1.96                                         | 0.29                           | 0.03              | 12.00                 |
| P05155            | Plasma protease C1 inhibitor;                                | 0.28                                         | 0.08                           | 0.78              | 16.20                 |
| Q8NC51            | Plasminogen activator inhibitor 1 RNA-binding protein;       | -0.25                                        | -0.07                          | 0.80              | 10.80                 |
| P05121            | Plasminogen activator inhibitor 1;                           | 0.60                                         | 0.21                           | 0.55              | 12.70                 |
| Q14651            | Plastin-1;                                                   | -2.56                                        | -2.11                          | 0.08              | 6.40                  |
| P13797            | Plastin-3;                                                   | -1.29                                        | -0.47                          | 0.21              | 11.40                 |
| Q5VY43            | Platelet endothelial aggregation receptor 1;                 | -0.36                                        | -0.04                          | 0.69              | 1.10                  |
| P43034            | Platelet-activating factor acetylhydrolase IB subunit alpha; | -0.49                                        | -0.31                          | 0.69              | 9.00                  |
| P68402            | Platelet-activating factor acetylhydrolase IB subunit beta;  | 0.25                                         | 0.04                           | 0.79              | 8.30                  |
| Q15102            | Platelet-activating factor acetylhydrolase IB subunit gammr  | 0.24                                         | 0.02                           | 0.79              | 3.90                  |
| Q15198            | Platelet-derived growth factor receptor-like protein;        | -0.17                                        | -0.02                          | 0.85              | 3.20                  |
| Q15149            | Plectin;                                                     | -0.60                                        | -0.37                          | 0.63              | 16.50                 |
| O43660            | Pleiotropic regulator 1;                                     | -1.12                                        | -0.10                          | 0.21              | 2.50                  |
| O15031            | Plexin-B2;                                                   | 2.64                                         | 0.46                           | 0.00              | 0.70                  |
| Q92692            | Poliovirus receptor-related protein 2;                       | 0.48                                         | 0.19                           | 0.66              | 7.40                  |
| P15151            | Poliovirus receptor;                                         | -5.64                                        | 0.00                           | 0.00              | 2.90                  |
| P09874            | Poly [ADP-ribose] polymerase 1;                              | -1.22                                        | -1.53                          | 0.55              | 16.60                 |

Table S1

| Uniprot accession | Name                                                 | Fold-change (log <sub>2</sub> ) of ASPAratio | Fold-change standard deviation | ASPAratio p-value | Sequence coverage (%) |
|-------------------|------------------------------------------------------|----------------------------------------------|--------------------------------|-------------------|-----------------------|
| P51003            | Poly(A) polymerase alpha;                            | 2.01                                         | 0.20                           | 0.03              | 1.90                  |
| Q9NX46            | Poly(ADP-ribose) glycohydrolase ARH3;                | -2.06                                        | -4.46                          | 0.53              | 10.70                 |
| Q15365            | Poly(rC)-binding protein 1;                          | -0.18                                        | -0.07                          | 0.86              | 32.00                 |
| Q15366            | Poly(rC)-binding protein 2;                          | -0.38                                        | -0.18                          | 0.74              | 24.90                 |
| Q9UHX1            | Poly(U)-binding-splicing factor PUF60;               | 0.03                                         | 0.01                           | 0.98              | 15.00                 |
| P11940            | Polyadenylate-binding protein 1;                     | 0.72                                         | 0.31                           | 0.51              | 19.80                 |
| Q13310            | Polyadenylate-binding protein 4;                     | 0.77                                         | 0.13                           | 0.40              | 7.30                  |
| Q96DU9            | Polyadenylate-binding protein 5;                     | 3.75                                         | 0.21                           | 0.00              | 5.00                  |
| Q6NZI2            | Polymerase I and transcript release factor;          | -0.18                                        | -0.07                          | 0.86              | 20.30                 |
| Q10471            | Polypeptide N-acetylgalactosaminyltransferase 2;     | 0.44                                         | 0.22                           | 0.70              | 19.40                 |
| P26599            | Polypyrimidine tract-binding protein 1;              | -1.15                                        | -0.82                          | 0.40              | 23.20                 |
| Q9Y3B4            | Pre-mRNA branch site protein p14;                    | -2.56                                        | -0.45                          | 0.01              | 11.20                 |
| Q9UMS4            | Pre-mRNA-processing factor 19;                       | 2.78                                         | 0.39                           | 0.00              | 2.20                  |
| O75400            | Pre-mRNA-processing factor 40 homolog A;             | 0.07                                         | 0.01                           | 0.94              | 1.50                  |
| Q6P2Q9            | Pre-mRNA-processing-splicing factor 8;               | 0.77                                         | 0.49                           | 0.55              | 2.50                  |
| Q9UHV9            | Prefoldin subunit 2;                                 | -0.40                                        | -0.09                          | 0.67              | 24.00                 |
| P61758            | Prefoldin subunit 3;                                 | -1.43                                        | -0.12                          | 0.11              | 5.10                  |
| Q9NQP4            | Prefoldin subunit 4;                                 | -1.25                                        | -1.25                          | 0.46              | 20.10                 |
| Q99471            | Prefoldin subunit 5;                                 | -1.84                                        | -2.03                          | 0.32              | 14.90                 |
| P20742            | Pregnancy zone protein;                              | 0.69                                         | 0.04                           | 0.44              | 2.40                  |
| P02545            | Prelamin-A/C;                                        | -0.27                                        | -0.19                          | 0.84              | 44.70                 |
| P07602            | Proactivator polypeptide;                            | 2.13                                         | 1.64                           | 0.13              | 31.90                 |
| Q9NV35            | Probable 8-oxo-dGTP diphosphatase NUDT15;            | 2.08                                         | 0.25                           | 0.02              | 7.30                  |
| Q92841            | Probable ATP-dependent RNA helicase DDX17;           | -0.27                                        | -0.14                          | 0.82              | 10.30                 |
| Q9BUQ8            | Probable ATP-dependent RNA helicase DDX23;           | -1.64                                        | -0.87                          | 0.17              | 7.20                  |
| P26196            | Probable ATP-dependent RNA helicase DDX6;            | 0.59                                         | 0.26                           | 0.59              | 10.40                 |
| Q96GX9            | Probable methylthioribulose-1-phosphate dehydratase; | -0.89                                        | -0.71                          | 0.55              | 12.00                 |
| Q9UKZ9            | Procollagen C-endopeptidase enhancer 2;              | -1.00                                        | -0.42                          | 0.35              | 9.40                  |
| Q02809            | Procollagen-lysine,2-oxoglutarate 5-dioxygenase 1;   | 0.94                                         | 0.29                           | 0.35              | 20.50                 |
| O60568            | Procollagen-lysine,2-oxoglutarate 5-dioxygenase 3;   | 0.11                                         | 0.06                           | 0.93              | 17.60                 |
| P07737            | Profilin-1;                                          | -1.09                                        | -0.70                          | 0.39              | 62.10                 |
| P35080            | Profilin-2;                                          | -0.25                                        | -0.20                          | 0.86              | 15.70                 |
| Q8WUM4            | Programmed cell death 6-interacting protein;         | -0.79                                        | -0.94                          | 0.69              | 18.00                 |
| Q53EL6            | Programmed cell death protein 4;                     | 0.73                                         | 0.06                           | 0.42              | 3.40                  |
| O14737            | Programmed cell death protein 5;                     | -0.58                                        | -0.16                          | 0.55              | 17.60                 |
| O75340            | Programmed cell death protein 6;                     | 0.18                                         | 0.02                           | 0.85              | 9.90                  |
| P12004            | Proliferating cell nuclear antigen;                  | -0.56                                        | -0.29                          | 0.63              | 36.00                 |
| Q9UQ80            | Proliferation-associated protein 2G4;                | -0.69                                        | -0.41                          | 0.58              | 38.30                 |
| Q8IZL8            | Proline-, glutamic acid- and leucine-rich protein 1; | -1.15                                        | -0.44                          | 0.27              | 1.90                  |
| P48147            | Prolyl endopeptidase;                                | -0.47                                        | -0.24                          | 0.68              | 10.40                 |
| P29122            | Proprotein convertase subtilisin/kexin type 6;       | 0.64                                         | 0.10                           | 0.49              | 2.50                  |
| Q8NBP7            | Proprotein convertase subtilisin/kexin type 9;       | 0.53                                         | 0.19                           | 0.61              | 21.20                 |
| Q9UHG2            | ProSAAS;                                             | -0.71                                        | -0.05                          | 0.42              | 3.80                  |
| Q15185            | Prostaglandin E synthase 3;                          | -0.40                                        | -0.24                          | 0.75              | 17.50                 |
| Q9P2B2            | Prostaglandin F2 receptor negative regulator;        | -0.94                                        | -0.45                          | 0.40              | 9.60                  |
| Q14914            | Prostaglandin reductase 1;                           | -0.81                                        | -0.11                          | 0.37              | 4.30                  |
| P41222            | Prostaglandin-H2 D-isomerase;                        | 3.55                                         | 1.12                           | 0.00              | 17.40                 |
| Q06323            | Proteasome activator complex subunit 1;              | -0.15                                        | -0.10                          | 0.91              | 25.30                 |
| Q9UL46            | Proteasome activator complex subunit 2;              | -1.84                                        | -1.84                          | 0.29              | 10.50                 |
| P61289            | Proteasome activator complex subunit 3;              | -1.84                                        | -1.77                          | 0.27              | 6.70                  |
| Q9BT73            | Proteasome assembly chaperone 3;                     | 0.03                                         | 0.00                           | 0.98              | 12.30                 |
| P25786            | Proteasome subunit alpha type-1;                     | 0.32                                         | 0.60                           | 0.91              | 17.90                 |
| P25787            | Proteasome subunit alpha type-2;                     | -0.54                                        | -0.11                          | 0.57              | 20.90                 |
| P25788            | Proteasome subunit alpha type-3;                     | 5.42                                         | 20.05                          | 0.32              | 8.20                  |
| P28066            | Proteasome subunit alpha type-5;                     | -0.36                                        | -0.18                          | 0.76              | 45.60                 |
| P60900            | Proteasome subunit alpha type-6;                     | -1.22                                        | -1.05                          | 0.43              | 26.40                 |
| O14818            | Proteasome subunit alpha type-7;                     | 0.12                                         | 0.03                           | 0.90              | 28.60                 |

Table S1

| Uniprot accession | Name                                                        | Fold-change (log <sub>2</sub> ) of ASPAratio | Fold-change standard deviation | ASPAratio p-value | Sequence coverage (%) |
|-------------------|-------------------------------------------------------------|----------------------------------------------|--------------------------------|-------------------|-----------------------|
| P20618            | Proteasome subunit beta type-1;                             | -0.15                                        | -0.05                          | 0.89              | 38.60                 |
| P49720            | Proteasome subunit beta type-3;                             | 0.04                                         | 0.00                           | 0.97              | 22.00                 |
| P28070            | Proteasome subunit beta type-4;                             | -0.76                                        | -0.04                          | 0.40              | 3.40                  |
| P28072            | Proteasome subunit beta type-6;                             | -0.36                                        | -0.30                          | 0.81              | 13.00                 |
| Q99436            | Proteasome subunit beta type-7;                             | -0.25                                        | -0.06                          | 0.80              | 11.20                 |
| P28062            | Proteasome subunit beta type-8;                             | -1.29                                        | -0.60                          | 0.24              | 18.50                 |
| Q8IVF2            | Protein AHNAK2;                                             | 2.57                                         | 0.58                           | 0.01              | 3.90                  |
| Q99873            | Protein arginine N-methyltransferase 1;                     | -0.43                                        | -0.19                          | 0.69              | 30.50                 |
| O14744            | Protein arginine N-methyltransferase 5;                     | 0.51                                         | 0.23                           | 0.65              | 4.60                  |
| Q9UKV8            | Protein argonaute-2;                                        | -2.25                                        | -1.50                          | 0.08              | 3.50                  |
| Q9Y2B0            | Protein canopy homolog 2;                                   | -0.58                                        | -0.08                          | 0.52              | 13.70                 |
| O75629            | Protein CREG1;                                              | 1.79                                         | 0.11                           | 0.05              | 5.50                  |
| O60888            | Protein CutA;                                               | 0.44                                         | 0.04                           | 0.62              | 7.80                  |
| O00622            | Protein CYR61;                                              | -0.45                                        | -0.06                          | 0.62              | 11.80                 |
| O60610            | Protein diaphanous homolog 1;                               | -1.40                                        | -0.18                          | 0.13              | 0.90                  |
| P30101            | Protein disulfide-isomerase A3;                             | -0.12                                        | -0.10                          | 0.93              | 25.70                 |
| P13667            | Protein disulfide-isomerase A4;                             | -0.71                                        | -0.23                          | 0.48              | 19.80                 |
| Q15084            | Protein disulfide-isomerase A6;                             | 0.71                                         | 0.58                           | 0.63              | 17.50                 |
| P07237            | Protein disulfide-isomerase;                                | -0.09                                        | -0.03                          | 0.93              | 31.90                 |
| Q99497            | Protein DJ-1;                                               | -0.54                                        | -0.23                          | 0.63              | 37.00                 |
| Q01658            | Protein Dr1;                                                | 0.31                                         | 0.05                           | 0.74              | 7.40                  |
| Q92520            | Protein FAM3C;                                              | -1.32                                        | -0.53                          | 0.21              | 39.60                 |
| Q9NUQ9            | Protein FAM49B;                                             | -1.00                                        | -0.50                          | 0.38              | 21.30                 |
| Q14320            | Protein FAM50A;                                             | 0.32                                         | 0.05                           | 0.73              | 4.10                  |
| Q8NCA5            | Protein FAM98A;                                             | 0.32                                         | 0.03                           | 0.72              | 2.30                  |
| P49354            | Protein farnesyltransferase/geranylgeranyltransferase type- | -0.32                                        | -0.02                          | 0.73              | 3.40                  |
| Q13045            | Protein flightless-1 homolog;                               | 0.14                                         | 0.05                           | 0.89              | 1.30                  |
| O94992            | Protein HEXIM1;                                             | 0.26                                         | 0.06                           | 0.78              | 7.00                  |
| Q9UNF0            | Protein kinase C and casein kinase substrate in neurons prc | -1.32                                        | -1.26                          | 0.42              | 11.70                 |
| Q9UKS6            | Protein kinase C and casein kinase substrate in neurons prc | 0.20                                         | 0.04                           | 0.83              | 6.60                  |
| Q96EK9            | Protein KTI12 homolog;                                      | -6.64                                        | 0.00                           | 0.00              | 3.70                  |
| Q9BRT6            | Protein LLP homolog;                                        | -0.71                                        | -0.07                          | 0.43              | 10.90                 |
| P61326            | Protein mago nashi homolog;                                 | 2.15                                         | 5.36                           | 0.56              | 14.40                 |
| Q9UGV2            | Protein NDRG3;                                              | -0.47                                        | -0.07                          | 0.60              | 4.00                  |
| O14974            | Protein phosphatase 1 regulatory subunit 12A;               | -0.58                                        | -0.07                          | 0.52              | 1.90                  |
| Q15435            | Protein phosphatase 1 regulatory subunit 7;                 | 5.04                                         | 0.84                           | 0.00              | 3.10                  |
| P35813            | Protein phosphatase 1A;                                     | -0.49                                        | -0.05                          | 0.58              | 2.90                  |
| O75688            | Protein phosphatase 1B;                                     | -1.89                                        | -0.28                          | 0.04              | 2.30                  |
| P49593            | Protein phosphatase 1F;                                     | -0.17                                        | -0.02                          | 0.85              | 3.50                  |
| O15355            | Protein phosphatase 1G;                                     | -0.32                                        | -0.08                          | 0.74              | 8.40                  |
| P41236            | Protein phosphatase inhibitor 2;                            | 0.40                                         | 0.02                           | 0.65              | 4.90                  |
| Q9P258            | Protein RCC2;                                               | -0.43                                        | -0.18                          | 0.69              | 14.90                 |
| P31949            | Protein S100-A11;                                           | -0.49                                        | -0.02                          | 0.57              | 30.50                 |
| Q99584            | Protein S100-A13;                                           | -1.03                                        | -0.19                          | 0.28              | 40.80                 |
| Q96FQ6            | Protein S100-A16;                                           | -0.38                                        | -0.04                          | 0.67              | 23.30                 |
| P26447            | Protein S100-A4;                                            | -0.89                                        | -0.28                          | 0.38              | 26.70                 |
| P25815            | Protein S100-P;                                             | -3.18                                        | -0.58                          | 0.00              | 13.70                 |
| Q01105            | Protein SET;                                                | 0.00                                         | 0.00                           | 1.00              | 17.90                 |
| P18583            | Protein SON;                                                | 2.61                                         | 3.76                           | 0.25              | 1.70                  |
| Q15437            | Protein transport protein Sec23B;                           | -1.52                                        | -0.61                          | 0.15              | 4.40                  |
| P53992            | Protein transport protein Sec24C;                           | 0.25                                         | 0.03                           | 0.79              | 6.40                  |
| O94979            | Protein transport protein Sec31A;                           | 1.22                                         | 0.33                           | 0.21              | 3.70                  |
| Q12974            | Protein tyrosine phosphatase type IVA 2;                    | -0.29                                        | -0.03                          | 0.75              | 8.40                  |
| P28300            | Protein-lysine 6-oxidase;                                   | 1.93                                         | 0.13                           | 0.03              | 3.10                  |
| P06454            | Prothymosin alpha;                                          | 0.11                                         | 0.01                           | 0.91              | 9.00                  |
| P00491            | Purine nucleoside phosphorylase;                            | 0.40                                         | 0.23                           | 0.74              | 22.10                 |
| P55786            | Puromycin-sensitive aminopeptidase;                         | -1.29                                        | -0.63                          | 0.26              | 19.40                 |

Table S1

| Uniprot accession | Name                                                      | Fold-change (log <sub>2</sub> ) of ASAPratio | Fold-change standard deviation | ASAPratio p-value | Sequence coverage (%) |
|-------------------|-----------------------------------------------------------|----------------------------------------------|--------------------------------|-------------------|-----------------------|
| O43865            | Putative adenosylhomocysteinase 2;                        | 0.14                                         | 0.02                           | 0.88              | 2.30                  |
| Q96GX2            | Putative ataxin-7-like protein 3B;                        | -0.20                                        | -0.05                          | 0.83              | 10.30                 |
| Q6P158            | Putative ATP-dependent RNA helicase DHX57;                | -0.45                                        | -0.03                          | 0.61              | 2.20                  |
| O75884            | Putative hydrolase RBBP9;                                 | -0.76                                        | -0.06                          | 0.40              | 8.10                  |
| O60361            | Putative nucleoside diphosphate kinase;                   | 0.21                                         | 0.05                           | 0.82              | 54.00                 |
| Q49A26            | Putative oxidoreductase GLYR1;                            | -0.23                                        | -0.14                          | 0.86              | 4.90                  |
| Q6GMV3            | Putative peptidyl-tRNA hydrolase PTRHD1;                  | -1.89                                        | -0.21                          | 0.04              | 8.60                  |
| Q8NHP8            | Putative phospholipase B-like 2;                          | 1.32                                         | 0.28                           | 0.16              | 12.10                 |
| O43143            | Putative pre-mRNA-splicing factor ATP-dependent RNA f     | -0.38                                        | -0.09                          | 0.69              | 7.50                  |
| P98179            | Putative RNA-binding protein 3;                           | -0.64                                        | -0.22                          | 0.53              | 27.40                 |
| Q9Y383            | Putative RNA-binding protein Luc7-like 2;                 | -0.34                                        | -0.06                          | 0.72              | 8.70                  |
| Q9HBR0            | Putative sodium-coupled neutral amino acid transporter 10 | 0.77                                         | 0.42                           | 0.52              | 3.30                  |
| A6NL28            | Putative tropomyosin alpha-3 chain-like protein;          | -0.49                                        | -0.09                          | 0.59              | 6.30                  |
| Q9NVS9            | Pyridoxine-5'-phosphate oxidase;                          | -0.64                                        | -0.11                          | 0.49              | 11.50                 |
| P14618            | Pyruvate kinase isozymes M1/M2;                           | -0.94                                        | -0.47                          | 0.41              | 51.60                 |
| Q53FA7            | Quinone oxidoreductase PIG3;                              | -0.15                                        | -0.12                          | 0.92              | 10.80                 |
| P31150            | Rab GDP dissociation inhibitor alpha;                     | -1.43                                        | -0.81                          | 0.24              | 11.40                 |
| Q6IAA8            | Ragulator complex protein LAMTOR1;                        | 3.47                                         | 0.23                           | 0.00              | 7.50                  |
| Q9UHA4            | Ragulator complex protein LAMTOR3;                        | -0.09                                        | -0.01                          | 0.92              | 8.10                  |
| O43504            | Ragulator complex protein LAMTOR5;                        | -0.11                                        | -0.01                          | 0.91              | 22.00                 |
| Q9HD47            | Ran guanine nucleotide release factor;                    | 0.03                                         | 0.00                           | 0.98              | 7.00                  |
| Q9H6Z4            | Ran-binding protein 3;                                    | 2.00                                         | 0.29                           | 0.03              | 2.10                  |
| P43487            | Ran-specific GTPase-activating protein;                   | 0.45                                         | 0.06                           | 0.62              | 10.90                 |
| A6NKT7            | RanBP2-like and GRIP domain-containing protein 3;         | 0.44                                         | 0.05                           | 0.62              | 0.70                  |
| P52306            | Rap1 GTPase-GDP dissociation stimulator 1;                | 0.61                                         | 0.14                           | 0.51              | 1.60                  |
| Q13283            | Ras GTPase-activating protein-binding protein 1;          | -0.76                                        | -0.52                          | 0.57              | 28.80                 |
| P46940            | Ras GTPase-activating-like protein IQGAP1;                | -0.20                                        | -0.09                          | 0.85              | 12.80                 |
| Q15404            | Ras suppressor protein 1;                                 | -0.15                                        | -0.04                          | 0.88              | 9.40                  |
| P63000            | Ras-related C3 botulinum toxin substrate 1;               | -0.27                                        | -0.09                          | 0.79              | 17.70                 |
| Q15907            | Ras-related protein Rab-11B;                              | -0.36                                        | -0.07                          | 0.70              | 39.40                 |
| P61106            | Ras-related protein Rab-14;                               | -0.32                                        | -0.03                          | 0.73              | 11.60                 |
| P62820            | Ras-related protein Rab-1A;                               | 0.15                                         | 0.02                           | 0.86              | 22.90                 |
| Q9UL25            | Ras-related protein Rab-21;                               | 0.32                                         | 0.14                           | 0.77              | 9.80                  |
| P61019            | Ras-related protein Rab-2A;                               | 0.28                                         | 0.04                           | 0.76              | 6.60                  |
| P51149            | Ras-related protein Rab-7a;                               | -1.06                                        | -1.37                          | 0.61              | 15.90                 |
| P61224            | Ras-related protein Rap-1b;                               | -0.43                                        | -0.06                          | 0.64              | 6.00                  |
| P10586            | Receptor-type tyrosine-protein phosphatase F;             | 0.86                                         | 0.59                           | 0.52              | 13.80                 |
| P23470            | Receptor-type tyrosine-protein phosphatase gamma;         | -0.07                                        | -0.01                          | 0.94              | 3.40                  |
| Q15262            | Receptor-type tyrosine-protein phosphatase kappa;         | 1.06                                         | 0.77                           | 0.45              | 3.30                  |
| Q06330            | Recombining binding protein suppressor of hairless;       | -0.54                                        | -0.11                          | 0.57              | 3.20                  |
| Q9NQG5            | Regulation of nuclear pre-mRNA domain-containing prote    | -0.67                                        | -0.12                          | 0.48              | 4.60                  |
| P18754            | Regulator of chromosome condensation;                     | -0.97                                        | -0.17                          | 0.29              | 8.10                  |
| O75787            | Renin receptor;                                           | 0.14                                         | 0.15                           | 0.94              | 13.70                 |
| P35244            | Replication protein A 14 kDa subunit;                     | -0.25                                        | -0.03                          | 0.78              | 13.20                 |
| Q9UKL0            | REST corepressor 1;                                       | 0.51                                         | 0.11                           | 0.59              | 3.90                  |
| Q15293            | Reticulocalbin-1;                                         | 0.94                                         | 0.18                           | 0.31              | 4.50                  |
| Q9BZR6            | Reticulon-4 receptor;                                     | 1.47                                         | 0.09                           | 0.10              | 2.50                  |
| Q99969            | Retinoic acid receptor responder protein 2;               | 0.60                                         | 0.05                           | 0.50              | 14.10                 |
| Q9HB40            | Retinoid-inducible serine carboxypeptidase;               | 0.43                                         | 0.42                           | 0.79              | 18.10                 |
| P52565            | Rho GDP-dissociation inhibitor 1;                         | -0.38                                        | -0.02                          | 0.67              | 7.40                  |
| Q92888            | Rho guanine nucleotide exchange factor 1;                 | 2.04                                         | 0.13                           | 0.02              | 1.10                  |
| O75116            | Rho-associated protein kinase 2;                          | -1.47                                        | -0.21                          | 0.11              | 2.50                  |
| P08134            | Rho-related GTP-binding protein RhoC;                     | -0.18                                        | -0.01                          | 0.84              | 11.40                 |
| P13489            | Ribonuclease inhibitor;                                   | -1.29                                        | -0.53                          | 0.23              | 19.50                 |
| O00584            | Ribonuclease T2;                                          | 1.09                                         | 0.20                           | 0.24              | 20.30                 |
| P52758            | Ribonuclease UK114;                                       | 0.08                                         | 0.01                           | 0.92              | 7.30                  |
| P60891            | Ribose-phosphate pyrophosphokinase 1;                     | -0.27                                        | -0.03                          | 0.77              | 13.50                 |

Table S1

| Uniprot accession | Name                                                      | Fold-change (log <sub>2</sub> ) of ASAPratio | Fold-change standard deviation | ASPARatio p-value | Sequence coverage (%) |
|-------------------|-----------------------------------------------------------|----------------------------------------------|--------------------------------|-------------------|-----------------------|
| P11908            | Ribose-phosphate pyrophosphokinase 2;                     | 0.50                                         | 0.08                           | 0.59              | 13.50                 |
| Q9Y3A5            | Ribosome maturation protein SBDS;                         | 0.03                                         | 0.00                           | 0.98              | 18.00                 |
| Q9P2E9            | Ribosome-binding protein 1;                               | -1.89                                        | -0.35                          | 0.04              | 1.00                  |
| Q9Y508            | RING finger protein 114;                                  | 0.15                                         | 0.01                           | 0.86              | 5.30                  |
| Q9H6T3            | RNA polymerase II-associated protein 3;                   | -1.29                                        | -0.25                          | 0.17              | 2.00                  |
| P38159            | RNA-binding motif protein, X chromosome;                  | -0.17                                        | -0.04                          | 0.86              | 14.30                 |
| Q9NTZ6            | RNA-binding protein 12;                                   | -0.49                                        | -0.33                          | 0.70              | 5.40                  |
| P49756            | RNA-binding protein 25;                                   | -0.29                                        | -0.18                          | 0.82              | 5.10                  |
| Q14498            | RNA-binding protein 39;                                   | 0.07                                         | 0.03                           | 0.94              | 5.30                  |
| Q9Y5S9            | RNA-binding protein 8A;                                   | -0.18                                        | -0.02                          | 0.84              | 6.30                  |
| Q01844            | RNA-binding protein EWS;                                  | -0.71                                        | -0.42                          | 0.56              | 4.00                  |
| P35637            | RNA-binding protein FUS;                                  | 0.82                                         | 0.05                           | 0.36              | 4.40                  |
| Q9Y6N7            | Roundabout homolog 1;                                     | -0.94                                        | -1.25                          | 0.66              | 1.90                  |
| P22087            | rRNA 2'-O-methyltransferase fibrillar;                    | 0.24                                         | 0.02                           | 0.79              | 9.30                  |
| Q9Y265            | RuvB-like 1;                                              | 0.21                                         | 0.07                           | 0.83              | 20.40                 |
| Q9Y230            | RuvB-like 2;                                              | -0.69                                        | -0.56                          | 0.64              | 19.00                 |
| P31153            | S-adenosylmethionine synthase isoform type-2;             | -0.29                                        | -0.17                          | 0.81              | 20.50                 |
| P10768            | S-formylglutathione hydrolase;                            | -0.25                                        | -0.11                          | 0.82              | 11.30                 |
| Q13126            | S-methyl-5'-thioadenosine phosphorylase;                  | -2.18                                        | -2.68                          | 0.27              | 24.00                 |
| Q15424            | Scaffold attachment factor B1;                            | -0.20                                        | -0.12                          | 0.87              | 4.70                  |
| Q8WVM8            | Sec1 family domain-containing protein 1;                  | -0.01                                        | 0.00                           | 0.99              | 1.60                  |
| Q9Y6Y8            | SEC23-interacting protein;                                | 1.34                                         | 0.16                           | 0.14              | 1.40                  |
| Q12765            | Secernin-1;                                               | 1.32                                         | 0.13                           | 0.14              | 5.10                  |
| Q8WVN6            | Secreted and transmembrane protein 1;                     | 2.32                                         | 0.32                           | 0.01              | 7.70                  |
| Q6UXD5            | Seizure 6-like protein 2;                                 | 0.95                                         | 0.12                           | 0.30              | 1.00                  |
| P49903            | Selenide, water dikinase 1;                               | -0.25                                        | -0.08                          | 0.81              | 3.80                  |
| Q96I15            | Selenocysteine lyase;                                     | -1.00                                        | -0.44                          | 0.36              | 7.20                  |
| Q14563            | Semaphorin-3A;                                            | 1.58                                         | 0.61                           | 0.13              | 14.70                 |
| Q99985            | Semaphorin-3C;                                            | -0.27                                        | -0.16                          | 0.83              | 27.70                 |
| Q9NPR2            | Semaphorin-4B;                                            | 0.15                                         | 0.01                           | 0.86              | 3.40                  |
| Q92854            | Semaphorin-4D;                                            | 0.99                                         | 0.18                           | 0.28              | 3.50                  |
| Q9H3T2            | Semaphorin-6C;                                            | -0.69                                        | -0.22                          | 0.49              | 1.20                  |
| O75326            | Semaphorin-7A;                                            | 1.23                                         | 0.81                           | 0.34              | 3.60                  |
| Q9P0V9            | Septin-10;                                                | -0.03                                        | -0.01                          | 0.97              | 4.00                  |
| Q9NVA2            | Septin-11;                                                | 0.24                                         | 0.10                           | 0.83              | 18.40                 |
| Q15019            | Septin-2;                                                 | -0.49                                        | -0.32                          | 0.70              | 28.00                 |
| Q9UHD8            | Septin-9;                                                 | -0.23                                        | -0.06                          | 0.81              | 10.90                 |
| P34896            | Serine hydroxymethyltransferase, cytosolic;               | -0.89                                        | -0.10                          | 0.33              | 2.10                  |
| P34897            | Serine hydroxymethyltransferase, mitochondrial;           | 0.61                                         | 0.04                           | 0.49              | 2.20                  |
| O95084            | Serine protease 23;                                       | -0.71                                        | -0.47                          | 0.58              | 25.10                 |
| Q92743            | Serine protease HTRA1;                                    | 0.64                                         | 0.37                           | 0.60              | 12.50                 |
| P49591            | Serine--tRNA ligase, cytoplasmic;                         | -0.54                                        | -0.05                          | 0.56              | 2.90                  |
| Q9Y3F4            | Serine-threonine kinase receptor-associated protein;      | -0.34                                        | -0.04                          | 0.71              | 24.60                 |
| Q9UQ35            | Serine/arginine repetitive matrix protein 2;              | -0.81                                        | -3.54                          | 0.90              | 1.60                  |
| Q07955            | Serine/arginine-rich splicing factor 1;                   | 0.31                                         | 0.16                           | 0.79              | 15.70                 |
| Q05519            | Serine/arginine-rich splicing factor 11;                  | 0.31                                         | 0.09                           | 0.75              | 5.20                  |
| P84103            | Serine/arginine-rich splicing factor 3;                   | -0.03                                        | 0.00                           | 0.97              | 10.40                 |
| Q13243            | Serine/arginine-rich splicing factor 5;                   | 1.78                                         | 0.20                           | 0.05              | 4.40                  |
| Q13247            | Serine/arginine-rich splicing factor 6;                   | -0.32                                        | -0.45                          | 0.89              | 9.60                  |
| Q16629            | Serine/arginine-rich splicing factor 7;                   | 1.06                                         | 0.07                           | 0.24              | 3.80                  |
| Q13242            | Serine/arginine-rich splicing factor 9;                   | 1.53                                         | 0.48                           | 0.13              | 7.70                  |
| Q9Y6E0            | Serine/threonine-protein kinase 24;                       | 0.08                                         | 0.01                           | 0.92              | 4.50                  |
| O95747            | Serine/threonine-protein kinase OSR1;                     | 0.45                                         | 0.23                           | 0.69              | 7.00                  |
| Q13177            | Serine/threonine-protein kinase PAK 2;                    | 0.64                                         | 0.45                           | 0.64              | 6.90                  |
| P63151            | Serine/threonine-protein phosphatase 2A 55 kDa regulator; | -0.11                                        | -0.01                          | 0.91              | 2.50                  |
| P30153            | Serine/threonine-protein phosphatase 2A 65 kDa regulator; | -1.12                                        | -0.54                          | 0.32              | 21.60                 |
| Q15257            | Serine/threonine-protein phosphatase 2A activator;        | 0.58                                         | 0.05                           | 0.53              | 6.40                  |

Table S1

| Uniprot accession | Name                                                         | Fold-change (log <sub>2</sub> ) of ASPAratio | Fold-change standard deviation | ASPAratio p-value | Sequence coverage (%) |
|-------------------|--------------------------------------------------------------|----------------------------------------------|--------------------------------|-------------------|-----------------------|
| P62714            | Serine/threonine-protein phosphatase 2A catalytic subunit    | -1.09                                        | -0.46                          | 0.31              | 6.10                  |
| P60510            | Serine/threonine-protein phosphatase 4 catalytic subunit;    | -0.58                                        | -0.49                          | 0.70              | 15.60                 |
| Q9NY27            | Serine/threonine-protein phosphatase 4 regulatory subunit    | 0.61                                         | 0.12                           | 0.51              | 3.60                  |
| P53041            | Serine/threonine-protein phosphatase 5;                      | 0.18                                         | 0.02                           | 0.85              | 1.40                  |
| O00743            | Serine/threonine-protein phosphatase 6 catalytic subunit;    | 0.50                                         | 0.04                           | 0.58              | 3.90                  |
| P62136            | Serine/threonine-protein phosphatase PP1-alpha catalytic s   | -0.38                                        | -0.05                          | 0.68              | 16.70                 |
| P02787            | Serotransferrin;                                             | -0.89                                        | -0.03                          | 0.33              | 2.00                  |
| P36952            | Serpin B5;                                                   | -0.32                                        | -0.08                          | 0.74              | 28.50                 |
| P35237            | Serpin B6;                                                   | -0.97                                        | -1.12                          | 0.61              | 23.40                 |
| P50453            | Serpin B9;                                                   | 1.23                                         | 0.93                           | 0.38              | 8.80                  |
| P50454            | Serpin H1;                                                   | 0.30                                         | 0.18                           | 0.81              | 13.90                 |
| Q9BXP5            | Serrate RNA effector molecule homolog;                       | 1.03                                         | 0.10                           | 0.25              | 2.40                  |
| P02768            | Serum albumin;                                               | -0.18                                        | -0.11                          | 0.88              | 4.60                  |
| O95810            | Serum deprivation-response protein;                          | 0.87                                         | 0.10                           | 0.34              | 3.30                  |
| Q6GMV2            | SET and MYND domain-containing protein 5;                    | 0.15                                         | 0.02                           | 0.86              | 2.60                  |
| P29353            | SHC-transforming protein 1;                                  | 0.11                                         | 0.01                           | 0.91              | 2.10                  |
| Q9HAT2            | Sialate O-acetyltransferase;                                 | 1.48                                         | 0.47                           | 0.14              | 13.80                 |
| Q9NR45            | Sialic acid synthase;                                        | -1.25                                        | -0.12                          | 0.17              | 8.60                  |
| Q99519            | Sialidase-1;                                                 | 0.28                                         | 0.24                           | 0.86              | 18.80                 |
| P37108            | Signal recognition particle 14 kDa protein;                  | -0.67                                        | -0.09                          | 0.47              | 8.80                  |
| O76094            | Signal recognition particle 72 kDa protein;                  | 0.26                                         | 0.02                           | 0.77              | 1.60                  |
| P49458            | Signal recognition particle 9 kDa protein;                   | 0.65                                         | 0.58                           | 0.67              | 22.10                 |
| Q92783            | Signal transducing adapter molecule 1;                       | -0.58                                        | -0.07                          | 0.52              | 2.20                  |
| O75093            | Slit homolog 1 protein;                                      | -0.36                                        | -0.10                          | 0.71              | 0.60                  |
| O43765            | Small glutamine-rich tetratricopeptide repeat-containing p   | -0.47                                        | -0.20                          | 0.66              | 15.30                 |
| P62304            | Small nuclear ribonucleoprotein E;                           | 0.03                                         | 0.00                           | 0.98              | 12.00                 |
| P62306            | Small nuclear ribonucleoprotein F;                           | -1.43                                        | -0.23                          | 0.12              | 9.30                  |
| A8MWD9            | Small nuclear ribonucleoprotein G-like protein;              | 1.41                                         | 0.10                           | 0.12              | 15.80                 |
| P62314            | Small nuclear ribonucleoprotein Sm D1;                       | 0.87                                         | 0.52                           | 0.48              | 9.20                  |
| P62316            | Small nuclear ribonucleoprotein Sm D2;                       | -0.97                                        | -1.03                          | 0.58              | 55.10                 |
| P62318            | Small nuclear ribonucleoprotein Sm D3;                       | 0.08                                         | 0.02                           | 0.92              | 7.10                  |
| P14678            | Small nuclear ribonucleoprotein-associated proteins B and    | -0.71                                        | -0.28                          | 0.49              | 23.80                 |
| P63165            | Small ubiquitin-related modifier 1;                          | -0.45                                        | -0.03                          | 0.61              | 11.90                 |
| P55854            | Small ubiquitin-related modifier 3;                          | 0.15                                         | 0.05                           | 0.88              | 12.60                 |
| P05023            | Sodium/potassium-transporting ATPase subunit alpha-1;        | 0.32                                         | 0.10                           | 0.75              | 3.30                  |
| Q8WVQ1            | Soluble calcium-activated nucleotidase 1;                    | 0.49                                         | 0.19                           | 0.65              | 18.00                 |
| P11166            | Solute carrier family 2, facilitated glucose transporter men | 1.47                                         | 0.24                           | 0.11              | 2.60                  |
| Q00796            | Sorbitol dehydrogenase;                                      | -0.89                                        | -0.59                          | 0.50              | 11.80                 |
| P30626            | Sorcin;                                                      | -0.89                                        | -0.36                          | 0.41              | 22.70                 |
| Q13596            | Sorting nexin-1;                                             | -1.47                                        | -0.12                          | 0.10              | 2.70                  |
| Q9Y5X3            | Sorting nexin-5;                                             | -0.89                                        | -0.54                          | 0.49              | 2.70                  |
| Q9UNH7            | Sorting nexin-6;                                             | 0.60                                         | 0.13                           | 0.53              | 7.60                  |
| Q9Y5X1            | Sorting nexin-9;                                             | -1.32                                        | -0.20                          | 0.15              | 2.40                  |
| P09486            | SPARC;                                                       | 0.56                                         | 0.26                           | 0.62              | 26.40                 |
| Q13813            | Spectrin alpha chain, non-erythrocytic 1;                    | 0.38                                         | 0.21                           | 0.75              | 12.00                 |
| P11277            | Spectrin beta chain, erythrocytic;                           | 9.96                                         | 0.36                           | 0.00              | 1.60                  |
| Q01082            | Spectrin beta chain, non-erythrocytic 1;                     | -0.38                                        | -0.32                          | 0.80              | 9.60                  |
| P19623            | Spermidine synthase;                                         | 0.28                                         | 0.02                           | 0.76              | 3.30                  |
| P52788            | Spermine synthase;                                           | -0.60                                        | -0.24                          | 0.57              | 10.40                 |
| Q13838            | Spliceosome RNA helicase DDX39B;                             | 0.18                                         | 0.12                           | 0.90              | 26.60                 |
| Q15637            | Splicing factor 1;                                           | -0.89                                        | -0.97                          | 0.63              | 7.80                  |
| Q15459            | Splicing factor 3A subunit 1;                                | -0.45                                        | -0.29                          | 0.73              | 14.20                 |
| Q15428            | Splicing factor 3A subunit 2;                                | 2.18                                         | 0.32                           | 0.02              | 3.90                  |
| Q12874            | Splicing factor 3A subunit 3;                                | 0.00                                         | 0.00                           | 1.00              | 7.00                  |
| O75533            | Splicing factor 3B subunit 1;                                | -0.04                                        | -0.02                          | 0.96              | 6.60                  |
| Q13435            | Splicing factor 3B subunit 2;                                | -0.58                                        | -0.35                          | 0.64              | 10.20                 |
| Q15393            | Splicing factor 3B subunit 3;                                | -0.25                                        | -0.10                          | 0.82              | 9.40                  |

Table S1

| Uniprot accession | Name                                                     | Fold-change (log <sub>2</sub> ) of ASPAratio | Fold-change standard deviation | ASPAratio p-value | Sequence coverage (%) |
|-------------------|----------------------------------------------------------|----------------------------------------------|--------------------------------|-------------------|-----------------------|
| Q9BWJ5            | Splicing factor 3B subunit 5;                            | 0.19                                         | 0.01                           | 0.83              | 10.50                 |
| P26368            | Splicing factor U2AF 65 kDa subunit;                     | -0.47                                        | -0.19                          | 0.65              | 15.40                 |
| P23246            | Splicing factor, proline- and glutamine-rich;            | 0.28                                         | 0.04                           | 0.76              | 8.90                  |
| Q15020            | Squamous cell carcinoma antigen recognized by T-cells 3; | -0.32                                        | -0.26                          | 0.83              | 3.60                  |
| Q14247            | Src substrate cortactin;                                 | -3.84                                        | 0.00                           | 0.00              | 2.00                  |
| P52823            | Stanniocalcin-1;                                         | 0.31                                         | 0.09                           | 0.75              | 13.40                 |
| Q7KZF4            | Staphylococcal nuclease domain-containing protein 1;     | 0.04                                         | 0.04                           | 0.98              | 14.90                 |
| P16949            | Stathmin;                                                | -0.20                                        | -0.07                          | 0.84              | 29.50                 |
| Q9H2G2            | STE20-like serine/threonine-protein kinase;              | 0.45                                         | 0.17                           | 0.66              | 3.60                  |
| P38646            | Stress-70 protein, mitochondrial;                        | -0.12                                        | -0.03                          | 0.90              | 7.80                  |
| P31948            | Stress-induced-phosphoprotein 1;                         | -1.06                                        | -0.79                          | 0.45              | 15.70                 |
| Q14683            | Structural maintenance of chromosomes protein 1A;        | 1.28                                         | 0.26                           | 0.17              | 0.80                  |
| P31040            | Succinate dehydrogenase [ubiquinone] flavoprotein subun  | 0.26                                         | 0.10                           | 0.80              | 4.80                  |
| Q8NBJ7            | Sulfatase-modifying factor 2;                            | -0.38                                        | -0.06                          | 0.68              | 22.60                 |
| O00391            | Sulfhydryl oxidase 1;                                    | 1.88                                         | 0.73                           | 0.07              | 22.20                 |
| Q6ZRP7            | Sulfhydryl oxidase 2;                                    | -0.17                                        | -0.09                          | 0.89              | 10.50                 |
| Q9UBE0            | SUMO-activating enzyme subunit 1;                        | -0.56                                        | -0.08                          | 0.55              | 4.00                  |
| Q9UBT2            | SUMO-activating enzyme subunit 2;                        | 0.21                                         | 0.04                           | 0.82              | 10.80                 |
| P63279            | SUMO-conjugating enzyme UBC9;                            | -0.49                                        | -0.06                          | 0.58              | 19.60                 |
| P42285            | Superkiller viralicidic activity 2-like 2;               | 0.59                                         | 0.37                           | 0.65              | 2.00                  |
| P00441            | Superoxide dismutase [Cu-Zn];                            | -0.20                                        | -0.02                          | 0.82              | 9.10                  |
| P04179            | Superoxide dismutase [Mn], mitochondrial;                | 0.59                                         | 0.07                           | 0.52              | 6.30                  |
| Q9Y2Z0            | Suppressor of G2 allele of SKP1 homolog;                 | 2.75                                         | 0.35                           | 0.00              | 4.10                  |
| P78539            | Sushi repeat-containing protein SRPX;                    | 0.19                                         | 0.05                           | 0.85              | 2.80                  |
| O60687            | Sushi repeat-containing protein SRPX2;                   | 0.06                                         | 0.04                           | 0.97              | 5.60                  |
| Q92922            | SWI/SNF complex subunit SMARCC1;                         | -1.22                                        | -1.13                          | 0.45              | 3.10                  |
| Q9UH65            | Switch-associated protein 70;                            | -0.34                                        | -0.03                          | 0.71              | 1.90                  |
| Q99536            | Synaptic vesicle membrane protein VAT-1 homolog;         | -1.09                                        | -1.11                          | 0.53              | 7.10                  |
| P31431            | Syndecan-4;                                              | 1.77                                         | 0.18                           | 0.05              | 13.60                 |
| O00560            | Syntenin-1;                                              | -0.40                                        | -0.26                          | 0.76              | 7.00                  |
| P17987            | T-complex protein 1 subunit alpha;                       | -0.32                                        | -0.12                          | 0.76              | 35.30                 |
| P78371            | T-complex protein 1 subunit beta;                        | -0.45                                        | -0.31                          | 0.73              | 38.30                 |
| P50991            | T-complex protein 1 subunit delta;                       | -0.81                                        | -0.64                          | 0.57              | 30.80                 |
| P48643            | T-complex protein 1 subunit epsilon;                     | -0.58                                        | -0.41                          | 0.67              | 17.70                 |
| Q99832            | T-complex protein 1 subunit eta;                         | -0.56                                        | -0.14                          | 0.57              | 24.90                 |
| P49368            | T-complex protein 1 subunit gamma;                       | -0.40                                        | -0.19                          | 0.72              | 25.70                 |
| P50990            | T-complex protein 1 subunit theta;                       | -0.49                                        | -0.15                          | 0.62              | 50.00                 |
| P40227            | T-complex protein 1 subunit zeta;                        | -0.76                                        | -0.18                          | 0.43              | 25.00                 |
| Q9Y490            | Talin-1;                                                 | -0.67                                        | -0.37                          | 0.58              | 17.80                 |
| Q7Z7G0            | Target of Nesh-SH3;                                      | 5.04                                         | 4.41                           | 0.00              | 4.10                  |
| O14907            | Tax1-binding protein 3;                                  | 0.91                                         | 0.19                           | 0.33              | 13.70                 |
| Q08629            | Testican-1;                                              | 2.54                                         | 0.53                           | 0.01              | 6.40                  |
| Q9BRA2            | Thioredoxin domain-containing protein 17;                | -0.11                                        | -0.02                          | 0.91              | 18.70                 |
| Q8NBS9            | Thioredoxin domain-containing protein 5;                 | -1.12                                        | -1.22                          | 0.53              | 23.40                 |
| Q16881            | Thioredoxin reductase 1, cytoplasmic;                    | 0.25                                         | 0.06                           | 0.80              | 14.60                 |
| P30048            | Thioredoxin-dependent peroxide reductase, mitochondrial; | 1.01                                         | 0.25                           | 0.29              | 17.60                 |
| P10599            | Thioredoxin;                                             | -0.12                                        | -0.06                          | 0.91              | 21.00                 |
| Q86V81            | THO complex subunit 4;                                   | -0.94                                        | -0.04                          | 0.29              | 4.30                  |
| P26639            | Threonine--tRNA ligase, cytoplasmic;                     | 0.07                                         | 0.05                           | 0.96              | 13.70                 |
| P07996            | Thrombospondin-1;                                        | -1.60                                        | -1.70                          | 0.36              | 21.60                 |
| P49746            | Thrombospondin-3;                                        | 3.36                                         | 1.63                           | 0.00              | 8.40                  |
| Q9P016            | Thymocyte nuclear protein 1;                             | -1.47                                        | -0.16                          | 0.10              | 4.90                  |
| Q9Y2W1            | Thyroid hormone receptor-associated protein 3;           | -0.04                                        | -0.02                          | 0.97              | 4.40                  |
| Q9UKU6            | Thyrotropin-releasing hormone-degrading ectoenzyme;      | 0.91                                         | 0.13                           | 0.32              | 4.50                  |
| Q07157            | Tight junction protein ZO-1;                             | 0.48                                         | 0.06                           | 0.61              | 0.70                  |
| Q9UDY2            | Tight junction protein ZO-2;                             | -1.12                                        | -0.85                          | 0.42              | 5.90                  |
| O75663            | TIP41-like protein;                                      | 0.97                                         | 0.18                           | 0.30              | 11.00                 |

Table S1

| Uniprot accession | Name                                                   | Fold-change (log <sub>2</sub> ) of ASAPratio | Fold-change standard deviation | ASPAratio p-value | Sequence coverage (%) |
|-------------------|--------------------------------------------------------|----------------------------------------------|--------------------------------|-------------------|-----------------------|
| P10646            | Tissue factor pathway inhibitor;                       | 2.21                                         | 1.09                           | 0.05              | 12.80                 |
| Q8WZ42            | Titin;                                                 | 4.20                                         | 3.64                           | 0.01              | 0.30                  |
| O14657            | Torsin-1B;                                             | 1.36                                         | 0.14                           | 0.13              | 4.20                  |
| Q96EM0            | Trans-L-3-hydroxyproline dehydratase;                  | -0.58                                        | -0.08                          | 0.52              | 8.80                  |
| P37837            | Transaldolase;                                         | -0.38                                        | -0.12                          | 0.70              | 16.60                 |
| P20062            | Transcobalamin-2;                                      | 1.25                                         | 0.12                           | 0.17              | 8.40                  |
| P23193            | Transcription elongation factor A protein 1;           | 0.82                                         | 0.07                           | 0.37              | 3.00                  |
| Q5H9L2            | Transcription elongation factor A protein-like 5;      | 0.07                                         | 0.00                           | 0.94              | 4.50                  |
| Q15370            | Transcription elongation factor B polypeptide 2;       | -0.45                                        | -0.05                          | 0.62              | 35.60                 |
| O00267            | Transcription elongation factor SPT5;                  | -1.06                                        | -0.84                          | 0.47              | 5.60                  |
| Q7KZ85            | Transcription elongation factor SPT6;                  | -0.40                                        | -0.07                          | 0.66              | 1.30                  |
| O14776            | Transcription elongation regulator 1;                  | 0.28                                         | 0.06                           | 0.77              | 2.10                  |
| P20290            | Transcription factor BTF3;                             | 0.51                                         | 0.05                           | 0.57              | 9.20                  |
| Q13263            | Transcription intermediary factor 1-beta;              | 0.11                                         | 0.04                           | 0.92              | 7.80                  |
| Q04724            | Transducin-like enhancer protein 1;                    | -0.12                                        | -0.08                          | 0.92              | 2.60                  |
| P02786            | Transferrin receptor protein 1;                        | 1.71                                         | 0.78                           | 0.12              | 17.50                 |
| P01137            | Transforming growth factor beta-1;                     | 1.89                                         | 0.71                           | 0.07              | 14.90                 |
| Q15582            | Transforming growth factor-beta-induced protein ig-h3; | -1.12                                        | -0.46                          | 0.29              | 10.80                 |
| P37802            | Transgelin-2;                                          | -0.23                                        | -0.09                          | 0.83              | 35.20                 |
| P55072            | Transitional endoplasmic reticulum ATPase;             | -1.00                                        | -0.44                          | 0.36              | 33.70                 |
| P29401            | Transketolase;                                         | -2.32                                        | -1.63                          | 0.08              | 30.00                 |
| Q92616            | Translational activator GCN1;                          | 2.12                                         | 0.20                           | 0.02              | 0.40                  |
| P13693            | Translationally-controlled tumor protein;              | -0.20                                        | -0.07                          | 0.84              | 27.30                 |
| Q99598            | Translin-associated protein X;                         | -0.69                                        | -0.21                          | 0.49              | 7.90                  |
| Q15631            | Translin;                                              | -0.18                                        | -0.02                          | 0.84              | 8.80                  |
| Q99805            | Transmembrane 9 superfamily member 2;                  | 1.57                                         | 0.21                           | 0.08              | 2.10                  |
| P49755            | Transmembrane emp24 domain-containing protein 10;      | 1.01                                         | 0.15                           | 0.27              | 5.50                  |
| Q24JP5            | Transmembrane protein 132A;                            | 1.73                                         | 0.21                           | 0.06              | 1.40                  |
| Q9UHN6            | Transmembrane protein 2;                               | -1.52                                        | -0.74                          | 0.18              | 4.30                  |
| Q92973            | Transportin-1;                                         | 0.65                                         | 0.69                           | 0.71              | 6.70                  |
| Q9Y5L0            | Transportin-3;                                         | -0.18                                        | -0.02                          | 0.84              | 2.60                  |
| Q13428            | Treacle protein;                                       | 0.78                                         | 0.05                           | 0.38              | 0.80                  |
| P22102            | Trifunctional purine biosynthetic protein adenosine-3; | 2.03                                         | 0.58                           | 0.04              | 6.30                  |
| P60174            | Triosephosphate isomerase;                             | -1.22                                        | -0.60                          | 0.29              | 57.00                 |
| O14773            | Tripeptidyl-peptidase 1;                               | 1.41                                         | 0.20                           | 0.12              | 14.20                 |
| P29144            | Tripeptidyl-peptidase 2;                               | 0.61                                         | 0.29                           | 0.58              | 4.60                  |
| Q08J23            | tRNA (cytosine(34)-C(5))-methyltransferase;            | -1.43                                        | -0.19                          | 0.12              | 1.30                  |
| Q9Y3I0            | tRNA-splicing ligase RtcB homolog;                     | -0.69                                        | -0.35                          | 0.55              | 17.20                 |
| Q9NYL9            | Tropomodulin-3;                                        | 0.92                                         | 0.51                           | 0.44              | 5.70                  |
| Q8IWU9            | Tryptophan 5-hydroxylase 2;                            | -4.64                                        | -8.13                          | 0.12              | 2.90                  |
| P23381            | Tryptophan--tRNA ligase, cytoplasmic;                  | 0.36                                         | 0.16                           | 0.75              | 17.20                 |
| P68363            | Tubulin alpha-1B chain;                                | 0.55                                         | 0.20                           | 0.60              | 35.50                 |
| P07437            | Tubulin beta chain;                                    | -0.56                                        | -0.16                          | 0.57              | 34.20                 |
| P68371            | Tubulin beta-4B chain;                                 | -0.18                                        | -0.02                          | 0.84              | 30.30                 |
| Q14166            | Tubulin--tyrosine ligase-like protein 12;              | -0.36                                        | -0.07                          | 0.70              | 10.10                 |
| Q9GZM7            | Tubulointerstitial nephritis antigen-like;             | -0.29                                        | -0.03                          | 0.75              | 2.80                  |
| O00300            | Tumor necrosis factor receptor superfamily member 11B; | -4.64                                        | -6.97                          | 0.06              | 8.00                  |
| Q9NP84            | Tumor necrosis factor receptor superfamily member 12A; | -0.84                                        | -0.03                          | 0.35              | 7.80                  |
| P19438            | Tumor necrosis factor receptor superfamily member 1A;  | 0.21                                         | 0.03                           | 0.81              | 3.30                  |
| O75509            | Tumor necrosis factor receptor superfamily member 21;  | -1.74                                        | -0.23                          | 0.05              | 2.70                  |
| O95407            | Tumor necrosis factor receptor superfamily member 6B;  | 1.95                                         | 0.44                           | 0.04              | 21.70                 |
| O43399            | Tumor protein D54;                                     | 1.74                                         | 2.64                           | 0.46              | 11.20                 |
| Q12888            | Tumor suppressor p53-binding protein 1;                | 0.86                                         | 0.44                           | 0.45              | 1.70                  |
| Q99816            | Tumor susceptibility gene 101 protein;                 | -2.18                                        | -0.89                          | 0.04              | 6.90                  |
| Q12792            | Twinfilin-1;                                           | -0.76                                        | -0.13                          | 0.42              | 8.60                  |
| Q6IBS0            | Twinfilin-2;                                           | -0.43                                        | -0.21                          | 0.71              | 17.50                 |
| Q9GZX9            | Twisted gastrulation protein homolog 1;                | 0.50                                         | 0.02                           | 0.58              | 6.70                  |



Table S1

| Uniprot accession | Name                                                 | Fold-change (log <sub>2</sub> ) of ASAPratio | Fold-change standard deviation | ASPARatio p-value | Sequence coverage (%) |
|-------------------|------------------------------------------------------|----------------------------------------------|--------------------------------|-------------------|-----------------------|
| P54577            | Tyrosine--tRNA ligase, cytoplasmic;                  | 0.04                                         | 0.02                           | 0.97              | 8.50                  |
| P06241            | Tyrosine-protein kinase Fyn;                         | -2.18                                        | -4.77                          | 0.51              | 3.00                  |
| P30530            | Tyrosine-protein kinase receptor UFO;                | 0.44                                         | 0.07                           | 0.63              | 3.40                  |
| Q06124            | Tyrosine-protein phosphatase non-receptor type 11;   | 0.43                                         | 0.15                           | 0.68              | 6.40                  |
| P08621            | U1 small nuclear ribonucleoprotein 70 kDa;           | -0.09                                        | -0.02                          | 0.93              | 10.80                 |
| P09012            | U1 small nuclear ribonucleoprotein A;                | -0.71                                        | -0.02                          | 0.42              | 13.50                 |
| P09234            | U1 small nuclear ribonucleoprotein C;                | -1.69                                        | -0.38                          | 0.08              | 11.30                 |
| P08579            | U2 small nuclear ribonucleoprotein B";               | -0.23                                        | -0.04                          | 0.81              | 14.70                 |
| O43818            | U3 small nucleolar RNA-interacting protein 2;        | 0.58                                         | 1.20                           | 0.86              | 9.10                  |
| O43395            | U4/U6 small nuclear ribonucleoprotein Prp3;          | -0.67                                        | -0.50                          | 0.64              | 8.30                  |
| O43172            | U4/U6 small nuclear ribonucleoprotein Prp4;          | -0.25                                        | -0.07                          | 0.80              | 2.30                  |
| Q53GS9            | U4/U6.U5 tri-snRNP-associated protein 2;             | -0.79                                        | -0.07                          | 0.39              | 5.30                  |
| O75643            | U5 small nuclear ribonucleoprotein 200 kDa helicase; | -0.89                                        | -0.51                          | 0.47              | 11.00                 |
| Q96DI7            | U5 small nuclear ribonucleoprotein 40 kDa protein;   | -1.15                                        | -0.13                          | 0.20              | 7.30                  |
| O15116            | U6 snRNA-associated Sm-like protein LSm1;            | -0.47                                        | -0.11                          | 0.62              | 12.00                 |
| Q9Y333            | U6 snRNA-associated Sm-like protein LSm2;            | 0.38                                         | 0.15                           | 0.72              | 27.40                 |
| Q9Y4Z0            | U6 snRNA-associated Sm-like protein LSm4;            | -0.69                                        | -0.03                          | 0.44              | 14.40                 |
| Q9UMX0            | Ubiquilin-1;                                         | -0.60                                        | -0.09                          | 0.51              | 2.50                  |
| Q9NRR5            | Ubiquilin-4;                                         | -0.64                                        | -0.26                          | 0.55              | 1.80                  |
| P54578            | Ubiquitin carboxyl-terminal hydrolase 14;            | -0.25                                        | -0.04                          | 0.79              | 4.00                  |
| P45974            | Ubiquitin carboxyl-terminal hydrolase 5;             | -0.27                                        | -0.22                          | 0.86              | 3.50                  |
| Q93009            | Ubiquitin carboxyl-terminal hydrolase 7;             | -0.47                                        | -0.05                          | 0.60              | 5.10                  |
| P15374            | Ubiquitin carboxyl-terminal hydrolase isozyme L3;    | -2.25                                        | -0.32                          | 0.01              | 8.70                  |
| Q9Y5K5            | Ubiquitin carboxyl-terminal hydrolase isozyme L5;    | 1.35                                         | 0.19                           | 0.14              | 6.70                  |
| O14562            | Ubiquitin domain-containing protein UBFD1;           | -0.25                                        | -0.03                          | 0.79              | 3.60                  |
| Q92890            | Ubiquitin fusion degradation protein 1 homolog;      | -0.81                                        | -0.16                          | 0.39              | 9.10                  |
| Q96FW1            | Ubiquitin thioesterase OTUB1;                        | -0.79                                        | -0.15                          | 0.40              | 15.90                 |
| P62979            | Ubiquitin-40S ribosomal protein S27a;                | -1.00                                        | -1.24                          | 0.61              | 42.30                 |
| Q14157            | Ubiquitin-associated protein 2-like;                 | -0.67                                        | -0.29                          | 0.54              | 5.40                  |
| P61077            | Ubiquitin-conjugating enzyme E2 D3;                  | 0.24                                         | 0.03                           | 0.80              | 7.50                  |
| P62253            | Ubiquitin-conjugating enzyme E2 G1;                  | -0.94                                        | -0.05                          | 0.29              | 7.10                  |
| P62256            | Ubiquitin-conjugating enzyme E2 H;                   | -0.01                                        | 0.00                           | 0.99              | 8.20                  |
| P61086            | Ubiquitin-conjugating enzyme E2 K;                   | -1.09                                        | -0.77                          | 0.42              | 15.00                 |
| P68036            | Ubiquitin-conjugating enzyme E2 L3;                  | -0.58                                        | -0.10                          | 0.53              | 47.40                 |
| P61088            | Ubiquitin-conjugating enzyme E2 N;                   | -0.20                                        | -0.10                          | 0.86              | 28.30                 |
| P49427            | Ubiquitin-conjugating enzyme E2 R1;                  | 0.55                                         | 0.04                           | 0.54              | 3.40                  |
| Q13404            | Ubiquitin-conjugating enzyme E2 variant 1;           | -0.12                                        | -0.01                          | 0.89              | 13.80                 |
| Q9H832            | Ubiquitin-conjugating enzyme E2 Z;                   | -0.89                                        | -0.17                          | 0.35              | 5.10                  |
| P61960            | Ubiquitin-fold modifier 1;                           | -0.67                                        | -0.22                          | 0.51              | 27.10                 |
| Q9Y3C8            | Ubiquitin-fold modifier-conjugating enzyme 1;        | 0.20                                         | 0.08                           | 0.85              | 5.40                  |
| Q8WVY7            | Ubiquitin-like domain-containing CTD phosphatase 1;  | 0.07                                         | 0.01                           | 0.94              | 7.50                  |
| P22314            | Ubiquitin-like modifier-activating enzyme 1;         | -0.97                                        | -0.57                          | 0.43              | 19.70                 |
| Q9NT62            | Ubiquitin-like-conjugating enzyme ATG3;              | 1.84                                         | 0.49                           | 0.06              | 4.10                  |
| Q05086            | Ubiquitin-protein ligase E3A;                        | 0.11                                         | 0.01                           | 0.91              | 1.60                  |
| Q14376            | UDP-glucose 4-epimerase;                             | 0.07                                         | 0.01                           | 0.94              | 2.90                  |
| O60701            | UDP-glucose 6-dehydrogenase;                         | -0.47                                        | -0.41                          | 0.76              | 6.30                  |
| Q9NYU2            | UDP-glucose:glycoprotein glucosyltransferase 1;      | 0.87                                         | 0.31                           | 0.40              | 3.40                  |
| Q8NBZ7            | UDP-glucuronic acid decarboxylase 1;                 | 1.40                                         | 0.20                           | 0.13              | 4.00                  |
| Q16222            | UDP-N-acetylhexosamine pyrophosphorylase;            | 1.05                                         | 0.43                           | 0.33              | 19.00                 |
| P30085            | UMP-CMP kinase;                                      | 0.77                                         | 0.28                           | 0.46              | 25.00                 |
| Q9BXV9            | Uncharacterized protein C14orf142;                   | -0.71                                        | -0.23                          | 0.48              | 18.00                 |
| Q92614            | Unconventional myosin-XVIIIa;                        | -0.25                                        | -0.02                          | 0.78              | 0.50                  |
| Q9HB07            | UPF0160 protein MYG1, mitochondrial;                 | -1.06                                        | -0.42                          | 0.32              | 11.70                 |
| Q9BVG4            | UPF0368 protein Cxorf26;                             | -0.07                                        | -0.01                          | 0.94              | 4.30                  |
| Q9H741            | UPF0454 protein C12orf49;                            | 0.33                                         | 0.05                           | 0.71              | 6.30                  |
| Q5T6V5            | UPF0553 protein C9orf64;                             | 0.44                                         | 0.03                           | 0.62              | 3.50                  |
| Q969H8            | UPF0556 protein C19orf10;                            | 1.36                                         | 0.69                           | 0.24              | 12.10                 |

Table S1

| Uniprot accession | Name                                                      | Fold-change (log <sub>2</sub> ) of ASPA ratio | Fold-change standard deviation | ASPA ratio p-value | Sequence coverage (%) |
|-------------------|-----------------------------------------------------------|-----------------------------------------------|--------------------------------|--------------------|-----------------------|
| Q9Y224            | UPF0568 protein C14orf166;                                | -0.23                                         | -0.06                          | 0.81               | 13.90                 |
| Q96S19            | UPF0585 protein C16orf13;                                 | -0.29                                         | -0.05                          | 0.75               | 11.80                 |
| Q8N4J0            | UPF0586 protein C9orf41;                                  | -2.00                                         | -2.48                          | 0.32               | 10.80                 |
| Q9NWW4            | UPF0587 protein C1orf123;                                 | -0.71                                         | -0.20                          | 0.46               | 15.00                 |
| Q9GZN8            | UPF0687 protein C20orf27;                                 | -0.40                                         | -0.17                          | 0.71               | 13.80                 |
| Q9H3H3            | UPF0696 protein C11orf68;                                 | -0.38                                         | -0.04                          | 0.67               | 16.70                 |
| P00749            | Urokinase-type plasminogen activator;                     | 0.08                                          | 0.04                           | 0.94               | 19.50                 |
| P06132            | Uroporphyrinogen decarboxylase;                           | -0.34                                         | -0.07                          | 0.72               | 9.30                  |
| Q16851            | UTP--glucose-1-phosphate uridylyltransferase;             | -0.17                                         | -0.05                          | 0.87               | 8.70                  |
| P54727            | UV excision repair protein RAD23 homolog B;               | 0.32                                          | 0.09                           | 0.74               | 16.60                 |
| Q96N03            | V-set and transmembrane domain-containing protein 2-like  | 2.49                                          | 0.37                           | 0.01               | 5.90                  |
| P38606            | V-type proton ATPase catalytic subunit A;                 | -2.74                                         | -0.18                          | 0.00               | 1.90                  |
| P21281            | V-type proton ATPase subunit B, brain isoform;            | -1.47                                         | -2.09                          | 0.51               | 7.20                  |
| Q15904            | V-type proton ATPase subunit S1;                          | 1.09                                          | 0.55                           | 0.34               | 16.20                 |
| Q709C8            | Vacuolar protein sorting-associated protein 13C;          | -6.64                                         | 0.00                           | 0.00               | 0.50                  |
| O75436            | Vacuolar protein sorting-associated protein 26A;          | -0.34                                         | -0.25                          | 0.81               | 13.50                 |
| Q9UBQ0            | Vacuolar protein sorting-associated protein 29;           | -0.23                                         | -0.04                          | 0.81               | 12.60                 |
| Q96QK1            | Vacuolar protein sorting-associated protein 35;           | -0.11                                         | -0.04                          | 0.92               | 2.90                  |
| P26640            | Valine--tRNA ligase;                                      | -0.20                                         | -0.06                          | 0.83               | 6.60                  |
| P50552            | Vasodilator-stimulated phosphoprotein;                    | 0.36                                          | 0.24                           | 0.79               | 5.80                  |
| Q6EMK4            | Vasorin;                                                  | 0.82                                          | 0.05                           | 0.36               | 8.00                  |
| P49748            | Very long-chain specific acyl-CoA dehydrogenase, mitoch   | -2.56                                         | -0.15                          | 0.00               | 1.50                  |
| Q9P035            | Very-long-chain (3R)-3-hydroxyacyl-[acyl-carrier protein] | 0.75                                          | 0.06                           | 0.40               | 3.00                  |
| Q9P0L0            | Vesicle-associated membrane protein-associated protein A. | -0.71                                         | -0.09                          | 0.43               | 10.00                 |
| O75396            | Vesicle-trafficking protein SEC22b;                       | -0.07                                         | -0.01                          | 0.94               | 4.70                  |
| Q12907            | Vesicular integral-membrane protein VIP36;                | -0.18                                         | -0.12                          | 0.89               | 6.50                  |
| Q00341            | Vigilin;                                                  | -0.84                                         | -1.27                          | 0.72               | 4.60                  |
| P08670            | Vimentin;                                                 | 0.00                                          | 0.00                           | 1.00               | 37.30                 |
| P18206            | Vinculin;                                                 | 1.28                                          | 1.04                           | 0.39               | 21.60                 |
| P04004            | Vitronectin;                                              | 0.45                                          | 0.06                           | 0.62               | 3.10                  |
| Q6PCB0            | von Willebrand factor A domain-containing protein 1;      | 2.32                                          | 0.23                           | 0.01               | 3.60                  |
| Q5VU97            | VWFA and cache domain-containing protein 1;               | -0.76                                         | -0.46                          | 0.55               | 2.00                  |
| O75083            | WD repeat-containing protein 1;                           | -2.25                                         | -1.61                          | 0.10               | 17.30                 |
| Q8NI36            | WD repeat-containing protein 36;                          | 0.38                                          | 0.02                           | 0.67               | 2.60                  |
| Q15061            | WD repeat-containing protein 43;                          | -0.43                                         | -0.05                          | 0.64               | 1.60                  |
| Q6UXN9            | WD repeat-containing protein 82;                          | -2.64                                         | -0.50                          | 0.00               | 4.50                  |
| Q96FK6            | WD repeat-containing protein 89;                          | -0.27                                         | -0.06                          | 0.78               | 7.80                  |
| Q2TAY7            | WD40 repeat-containing protein SMU1;                      | 0.37                                          | 0.03                           | 0.69               | 3.90                  |
| P13010            | X-ray repair cross-complementing protein 5;               | 0.12                                          | 0.06                           | 0.91               | 21.30                 |
| P12956            | X-ray repair cross-complementing protein 6;               | 0.20                                          | 0.04                           | 0.83               | 23.20                 |
| Q9NQW7            | Xaa-Pro aminopeptidase 1;                                 | 0.07                                          | 0.04                           | 0.95               | 9.50                  |
| P12955            | Xaa-Pro dipeptidase;                                      | -0.89                                         | -0.58                          | 0.49               | 8.90                  |
| Q9H1B5            | Xylosyltransferase 2;                                     | 0.15                                          | 0.01                           | 0.86               | 1.70                  |
| Q7Z739            | YTH domain family protein 3;                              | 0.43                                          | 0.03                           | 0.63               | 1.60                  |
| Q6PJT7            | Zinc finger CCCH domain-containing protein 14;            | 0.06                                          | 0.01                           | 0.95               | 1.50                  |
| Q7Z2W4            | Zinc finger CCCH-type antiviral protein 1;                | 0.03                                          | 0.00                           | 0.98               | 1.30                  |
| O43670            | Zinc finger protein 207;                                  | -0.89                                         | -0.23                          | 0.36               | 7.70                  |
| O75312            | Zinc finger protein ZPR1;                                 | 0.26                                          | 0.02                           | 0.77               | 2.80                  |
| O95218            | Zinc finger Ran-binding domain-containing protein 2;      | -1.60                                         | -0.15                          | 0.08               | 2.40                  |
| Q96KR1            | Zinc finger RNA-binding protein;                          | -0.17                                         | -0.02                          | 0.85               | 1.30                  |
| Q9ULF5            | Zinc transporter ZIP10;                                   | 1.66                                          | 1.74                           | 0.34               | 3.00                  |
| Q13433            | Zinc transporter ZIP6;                                    | 5.55                                          | 2.78                           | 0.00               | 1.30                  |
| P25311            | Zinc-alpha-2-glycoprotein;                                | 0.15                                          | 0.07                           | 0.89               | 13.10                 |
| Q15942            | Zyxin;                                                    | -2.18                                         | -2.38                          | 0.22               | 3.80                  |
| O14980            |                                                           | -0.56                                         | -0.21                          | 0.60               | 12.20                 |
