# Supplementary material for: Secretome and degradome profiling shows that Kallikrein‐related peptidases 4, 5, 6, and 7 induce TGFβ‐1 signaling in ovarian cancer cells
Source: PubMed Central journal article supplement — Mol Oncol. 2013 Oct 1;8(1):68–82. doi: 10.1016/j.molonc.2013.09.003 (PMC5528505; doi:10.1016/j.molonc.2013.09.003), 2013-10-01
Supplement: MOL2-8-068-s002.pdf [file MOL2-8-068-s002.pdf]

Table S2

Table S2: Identified and quantified proteins in the second replicate of global proteome comparison.  
 All proteins have a ProteinProphet probability score > 0.90, equivalent to an FDR < 0.01.  
 Ratios are normalized to hK expression / control.

| Uniprot accession | Name                                                  | Fold-change (log <sub>2</sub> ) of ASAPratio | Fold-change standard deviation | ASAPratio p-value | Sequence coverage (%) |
|-------------------|-------------------------------------------------------|----------------------------------------------|--------------------------------|-------------------|-----------------------|
| Q04446            | 1,4-alpha-glucan-branching enzyme;                    | -0.56                                        | -0.17                          | 0.48              | 4.40                  |
| P61604            | 10 kDa heat shock protein, mitochondrial;             | 1.05                                         | 0.10                           | 0.17              | 16.70                 |
| Q15029            | 116 kDa U5 small nuclear ribonucleoprotein component; | 0.78                                         | 0.13                           | 0.34              | 6.80                  |
| P31946            | 14-3-3 protein beta/alpha;                            | -0.35                                        | -0.09                          | 0.63              | 41.50                 |
| Q04917            | 14-3-3 protein eta;                                   | -0.21                                        | -0.07                          | 0.78              | 26.80                 |
| P61981            | 14-3-3 protein gamma;                                 | -0.35                                        | -0.03                          | 0.60              | 24.30                 |
| P31947            | 14-3-3 protein sigma;                                 | -0.37                                        | -0.04                          | 0.58              | 11.70                 |
| P27348            | 14-3-3 protein theta;                                 | -0.37                                        | -0.07                          | 0.60              | 34.70                 |
| P63104            | 14-3-3 protein zeta/delta;                            | -0.16                                        | -0.03                          | 0.79              | 34.70                 |
| P62191            | 26S protease regulatory subunit 4;                    | -1.18                                        | -1.22                          | 0.47              | 9.10                  |
| Q99460            | 26S proteasome non-ATPase regulatory subunit 1;       | -0.19                                        | -0.02                          | 0.76              | 2.00                  |
| O00231            | 26S proteasome non-ATPase regulatory subunit 11;      | 0.38                                         | 0.13                           | 0.71              | 8.50                  |
| Q9UNM6            | 26S proteasome non-ATPase regulatory subunit 13;      | -0.16                                        | -0.02                          | 0.78              | 6.10                  |
| Q13200            | 26S proteasome non-ATPase regulatory subunit 2;       | -0.37                                        | -0.20                          | 0.70              | 7.20                  |
| O43242            | 26S proteasome non-ATPase regulatory subunit 3;       | 0.78                                         | 0.22                           | 0.38              | 2.10                  |
| Q15008            | 26S proteasome non-ATPase regulatory subunit 6;       | 0.52                                         | 0.03                           | 0.52              | 2.30                  |
| O00233            | 26S proteasome non-ATPase regulatory subunit 9;       | 0.69                                         | 0.03                           | 0.39              | 5.40                  |
| Q13442            | 28 kDa heat- and acid-stable phosphoprotein;          | 0.76                                         | 0.53                           | 0.58              | 16.60                 |
| Q9Y2Q9            | 28S ribosomal protein S28, mitochondrial;             | 0.45                                         | 0.03                           | 0.58              | 5.30                  |
| P31937            | 3-hydroxyisobutyrate dehydrogenase, mitochondrial;    | 0.26                                         | 0.04                           | 0.78              | 3.90                  |
| P42765            | 3-ketoacyl-CoA thiolase, mitochondrial;               | 1.67                                         | 0.21                           | 0.03              | 5.30                  |
| O95861            | 3'(2'),5'-bisphosphate nucleotidase 1;                | -0.33                                        | -0.09                          | 0.65              | 10.70                 |
| Q9BYD6            | 39S ribosomal protein L1, mitochondrial;              | -0.16                                        | -0.02                          | 0.79              | 3.70                  |
| Q9Y3B7            | 39S ribosomal protein L11, mitochondrial;             | 7.19                                         | 2.33                           | 0.00              | 6.20                  |
| P52815            | 39S ribosomal protein L12, mitochondrial;             | 2.43                                         | 0.19                           | 0.00              | 12.60                 |
| Q8IXM3            | 39S ribosomal protein L41, mitochondrial;             | 4.04                                         | 0.62                           | 0.00              | 8.00                  |
| Q13405            | 39S ribosomal protein L49, mitochondrial;             | 3.63                                         | 1.71                           | 0.00              | 7.20                  |
| P25398            | 40S ribosomal protein S12;                            | 0.76                                         | 0.11                           | 0.35              | 25.00                 |
| P62841            | 40S ribosomal protein S15;                            | -0.16                                        | -0.02                          | 0.78              | 8.30                  |
| P62249            | 40S ribosomal protein S16;                            | 0.27                                         | 0.07                           | 0.78              | 21.20                 |
| P08708            | 40S ribosomal protein S17;                            | -1.28                                        | -0.06                          | 0.07              | 7.40                  |
| P62269            | 40S ribosomal protein S18;                            | -0.24                                        | -0.01                          | 0.70              | 7.20                  |
| P39019            | 40S ribosomal protein S19;                            | -0.21                                        | -0.04                          | 0.76              | 26.20                 |
| P15880            | 40S ribosomal protein S2;                             | -0.35                                        | -0.24                          | 0.75              | 26.60                 |
| P60866            | 40S ribosomal protein S20;                            | -0.49                                        | -0.05                          | 0.48              | 19.30                 |
| P63220            | 40S ribosomal protein S21;                            | 0.27                                         | 0.07                           | 0.78              | 39.80                 |
| P62266            | 40S ribosomal protein S23;                            | 5.36                                         | 6.84                           | 0.01              | 15.40                 |
| P62854            | 40S ribosomal protein S26;                            | 0.46                                         | 0.02                           | 0.57              | 7.80                  |
| Q71UM5            | 40S ribosomal protein S27-like;                       | 0.76                                         | 0.09                           | 0.34              | 13.10                 |
| P42677            | 40S ribosomal protein S27;                            | 1.08                                         | 0.17                           | 0.18              | 13.10                 |
| P62857            | 40S ribosomal protein S28;                            | 1.12                                         | 0.20                           | 0.17              | 17.40                 |
| P23396            | 40S ribosomal protein S3;                             | -0.16                                        | -0.05                          | 0.81              | 39.10                 |
| P62861            | 40S ribosomal protein S30;                            | 0.32                                         | 0.01                           | 0.71              | 16.90                 |
| P61247            | 40S ribosomal protein S3a;                            | 0.51                                         | 0.17                           | 0.59              | 18.60                 |
| P62701            | 40S ribosomal protein S4, X isoform;                  | -0.14                                        | -0.05                          | 0.83              | 25.90                 |
| P46782            | 40S ribosomal protein S5;                             | -0.33                                        | -0.06                          | 0.63              | 23.00                 |
| P62753            | 40S ribosomal protein S6;                             | -0.53                                        | -0.05                          | 0.44              | 14.10                 |
| P62241            | 40S ribosomal protein S8;                             | -0.33                                        | -0.07                          | 0.64              | 38.50                 |
| P46781            | 40S ribosomal protein S9;                             | -0.28                                        | -0.02                          | 0.66              | 9.80                  |
| P08865            | 40S ribosomal protein SA;                             | -0.21                                        | -0.12                          | 0.83              | 21.70                 |
| P08195            | 4F2 cell-surface antigen heavy chain;                 | 1.05                                         | 0.79                           | 0.45              | 12.50                 |
| Q01813            | 6-phosphofructokinase type C;                         | -0.67                                        | -0.09                          | 0.34              | 1.50                  |
| P08237            | 6-phosphofructokinase, muscle type;                   | -0.37                                        | -0.06                          | 0.59              | 1.50                  |
| O95336            | 6-phosphogluconolactonase;                            | -0.79                                        | -0.50                          | 0.48              | 24.40                 |

Table S2

| Uniprot accession | Name                                                      | Fold-change (log <sub>2</sub> ) of ASPAratio | Fold-change standard deviation | ASPAratio p-value | Sequence coverage (%) |
|-------------------|-----------------------------------------------------------|----------------------------------------------|--------------------------------|-------------------|-----------------------|
| P10809            | 60 kDa heat shock protein, mitochondrial;                 | 1.93                                         | 0.91                           | 0.06              | 28.30                 |
| P10155            | 60 kDa SS-A/Ro ribonucleoprotein;                         | 0.88                                         | 0.22                           | 0.31              | 5.40                  |
| P05388            | 60S acidic ribosomal protein P0;                          | 1.33                                         | 0.43                           | 0.14              | 26.20                 |
| P05386            | 60S acidic ribosomal protein P1;                          | 1.31                                         | 0.21                           | 0.10              | 14.00                 |
| P05387            | 60S acidic ribosomal protein P2;                          | 0.72                                         | 0.14                           | 0.39              | 67.00                 |
| P62906            | 60S ribosomal protein L10a;                               | 0.87                                         | 0.06                           | 0.27              | 22.60                 |
| P62913            | 60S ribosomal protein L11;                                | 0.32                                         | 0.03                           | 0.72              | 12.90                 |
| P26373            | 60S ribosomal protein L13;                                | -0.56                                        | -0.04                          | 0.41              | 15.20                 |
| P40429            | 60S ribosomal protein L13a;                               | 0.27                                         | 0.01                           | 0.76              | 7.80                  |
| P61313            | 60S ribosomal protein L15;                                | -0.51                                        | -0.53                          | 0.74              | 14.20                 |
| P18621            | 60S ribosomal protein L17;                                | -0.49                                        | -0.08                          | 0.49              | 17.40                 |
| Q07020            | 60S ribosomal protein L18;                                | -0.60                                        | -0.36                          | 0.58              | 19.70                 |
| Q02543            | 60S ribosomal protein L18a;                               | -0.72                                        | -0.08                          | 0.30              | 14.80                 |
| P46778            | 60S ribosomal protein L21;                                | -0.60                                        | -0.06                          | 0.40              | 20.60                 |
| P35268            | 60S ribosomal protein L22;                                | -0.14                                        | -0.01                          | 0.80              | 10.20                 |
| P62829            | 60S ribosomal protein L23;                                | -1.18                                        | -0.80                          | 0.33              | 11.40                 |
| P62750            | 60S ribosomal protein L23a;                               | 0.30                                         | 0.02                           | 0.73              | 8.30                  |
| P83731            | 60S ribosomal protein L24;                                | -0.51                                        | -0.13                          | 0.50              | 19.10                 |
| P61254            | 60S ribosomal protein L26;                                | -0.16                                        | -0.05                          | 0.81              | 16.60                 |
| P61353            | 60S ribosomal protein L27;                                | -0.32                                        | -0.09                          | 0.68              | 36.00                 |
| P46776            | 60S ribosomal protein L27a;                               | -0.49                                        | -0.04                          | 0.47              | 14.20                 |
| P46779            | 60S ribosomal protein L28;                                | -0.35                                        | -0.11                          | 0.65              | 21.20                 |
| P47914            | 60S ribosomal protein L29;                                | -0.65                                        | -0.07                          | 0.36              | 9.40                  |
| P39023            | 60S ribosomal protein L3;                                 | -0.69                                        | -0.26                          | 0.42              | 9.70                  |
| P62888            | 60S ribosomal protein L30;                                | -0.14                                        | -0.01                          | 0.80              | 24.30                 |
| P62910            | 60S ribosomal protein L32;                                | -0.60                                        | -0.24                          | 0.50              | 17.00                 |
| P18077            | 60S ribosomal protein L35a;                               | -0.41                                        | -0.04                          | 0.54              | 8.20                  |
| Q9Y3U8            | 60S ribosomal protein L36;                                | -0.49                                        | -0.04                          | 0.47              | 9.50                  |
| P36578            | 60S ribosomal protein L4;                                 | -0.60                                        | -0.15                          | 0.44              | 12.90                 |
| P18124            | 60S ribosomal protein L7;                                 | -0.82                                        | -0.30                          | 0.35              | 14.90                 |
| P62424            | 60S ribosomal protein L7a;                                | -0.14                                        | -0.01                          | 0.80              | 7.50                  |
| P32969            | 60S ribosomal protein L9;                                 | -0.21                                        | -0.13                          | 0.83              | 10.90                 |
| P11021            | 78 kDa glucose-regulated protein;                         | 0.86                                         | 0.14                           | 0.29              | 27.20                 |
| Q7L2J0            | 7SK snRNA methylphosphate capping enzyme;                 | -1.28                                        | -0.16                          | 0.08              | 1.50                  |
| Q92667            | A-kinase anchor protein 1, mitochondrial;                 | 0.30                                         | 0.02                           | 0.73              | 1.40                  |
| Q02952            | A-kinase anchor protein 12;                               | -0.67                                        | -0.31                          | 0.48              | 17.40                 |
| O43823            | A-kinase anchor protein 8;                                | 2.21                                         | 0.58                           | 0.01              | 2.90                  |
| P24752            | Acetyl-CoA acetyltransferase, mitochondrial;              | 0.99                                         | 0.12                           | 0.21              | 2.10                  |
| Q13510            | Acid ceramidase;                                          | -0.67                                        | -0.23                          | 0.43              | 14.70                 |
| Q9BTT0            | Acidic leucine-rich nuclear phosphoprotein 32 family men  | -0.47                                        | -0.05                          | 0.50              | 4.50                  |
| P61160            | Actin-related protein 2;                                  | -1.51                                        | -2.32                          | 0.52              | 8.90                  |
| O15143            | Actin-related protein 2/3 complex subunit 1B;             | -0.37                                        | -0.17                          | 0.68              | 9.40                  |
| O15144            | Actin-related protein 2/3 complex subunit 2;              | 0.68                                         | 0.03                           | 0.39              | 3.30                  |
| P59998            | Actin-related protein 2/3 complex subunit 4;              | 0.19                                         | 0.02                           | 0.84              | 11.30                 |
| P62736            | Actin, aortic smooth muscle;                              | 1.03                                         | 0.04                           | 0.18              | 25.00                 |
| P60709            | Actin, cytoplasmic 1;                                     | 1.61                                         | 0.54                           | 0.08              | 37.30                 |
| P53999            | Activated RNA polymerase II transcriptional coactivator p | 1.42                                         | 0.13                           | 0.06              | 31.50                 |
| O95433            | Activator of 90 kDa heat shock protein ATPase homolog 1   | 0.34                                         | 0.10                           | 0.73              | 18.60                 |
| P07108            | Acyl-CoA-binding protein;                                 | -0.19                                        | -0.04                          | 0.78              | 9.20                  |
| P13798            | Acylamino-acid-releasing enzyme;                          | -0.77                                        | -0.37                          | 0.43              | 5.70                  |
| P07311            | Acylphosphatase-1;                                        | 0.35                                         | 0.17                           | 0.76              | 22.20                 |
| Q6UY14            | ADAMTS-like protein 4;                                    | -0.53                                        | -0.14                          | 0.48              | 1.80                  |
| P55263            | Adenosine kinase;                                         | -0.45                                        | -0.23                          | 0.65              | 9.10                  |
| P23526            | Adenosylhomocysteinase;                                   | -0.84                                        | -0.35                          | 0.35              | 12.70                 |
| P54819            | Adenylate kinase 2, mitochondrial;                        | -0.22                                        | -0.06                          | 0.74              | 29.70                 |
| P00568            | Adenylate kinase isoenzyme 1;                             | -0.16                                        | -0.01                          | 0.78              | 6.70                  |
| P30520            | Adenylosuccinate synthetase isozyme 2;                    | 1.30                                         | 0.82                           | 0.29              | 12.70                 |

Table S2

| Uniprot accession | Name                                                       | Fold-change (log <sub>2</sub> ) of ASPAratio | Fold-change standard deviation | ASPAratio p-value | Sequence coverage (%) |
|-------------------|------------------------------------------------------------|----------------------------------------------|--------------------------------|-------------------|-----------------------|
| Q01518            | Adenylyl cyclase-associated protein 1;                     | -0.69                                        | -0.32                          | 0.47              | 16.60                 |
| P35318            | ADM;                                                       | -2.80                                        | -0.19                          | 0.00              | 7.00                  |
| Q15041            | ADP-ribosylation factor-like protein 6-interacting protein | 0.92                                         | 0.04                           | 0.24              | 4.90                  |
| Q66PJ3            | ADP-ribosylation factor-like protein 6-interacting protein | 2.38                                         | 0.44                           | 0.00              | 4.40                  |
| Q9UKK9            | ADP-sugar pyrophosphatase;                                 | -0.22                                        | -0.11                          | 0.80              | 16.90                 |
| P05141            | ADP/ATP translocase 2;                                     | 2.01                                         | 0.30                           | 0.01              | 7.00                  |
| O00468            | Agrin;                                                     | -0.60                                        | -0.39                          | 0.60              | 30.30                 |
| P14550            | Alcohol dehydrogenase [NADP(+)];                           | 0.64                                         | 0.46                           | 0.65              | 12.00                 |
| P11766            | Alcohol dehydrogenase class-3;                             | -1.04                                        | -0.34                          | 0.22              | 11.00                 |
| P47895            | Aldehyde dehydrogenase family 1 member A3;                 | -1.18                                        | -0.37                          | 0.17              | 24.60                 |
| Q8IZ83            | Aldehyde dehydrogenase family 16 member A1;                | -0.12                                        | -0.02                          | 0.82              | 2.00                  |
| P17516            | Aldo-keto reductase family 1 member C4;                    | 0.59                                         | 0.07                           | 0.46              | 3.70                  |
| P15121            | Aldose reductase;                                          | -0.99                                        | -0.23                          | 0.21              | 18.00                 |
| P05187            | Alkaline phosphatase, placental type;                      | -0.67                                        | -0.30                          | 0.47              | 13.90                 |
| P02765            | Alpha-2-HS-glycoprotein;                                   | 5.57                                         | 0.95                           | 0.00              | 3.30                  |
| O43768            | Alpha-endosulfine;                                         | -0.53                                        | -0.04                          | 0.43              | 11.60                 |
| P06733            | Alpha-enolase;                                             | -0.65                                        | -0.21                          | 0.43              | 41.70                 |
| P06280            | Alpha-galactosidase A;                                     | 0.38                                         | 0.10                           | 0.69              | 7.90                  |
| P35475            | Alpha-L-iduronidase;                                       | -1.21                                        | -0.08                          | 0.09              | 2.00                  |
| P54920            | Alpha-soluble NSF attachment protein;                      | -1.04                                        | -2.33                          | 0.75              | 15.60                 |
| P40222            | Alpha-taxilin;                                             | -0.32                                        | -0.04                          | 0.64              | 1.80                  |
| Q9BUJ0            | Alpha/beta hydrolase domain-containing protein 14A;        | 2.84                                         | 0.53                           | 0.00              | 3.70                  |
| Q06203            | Amidophosphoribosyltransferase;                            | 1.27                                         | 0.08                           | 0.10              | 2.30                  |
| Q9H4A4            | Aminopeptidase B;                                          | 1.04                                         | 0.97                           | 0.53              | 3.20                  |
| P15514            | Amphiregulin;                                              | 3.17                                         | 4.25                           | 0.14              | 7.90                  |
| P05067            | Amyloid beta A4 protein;                                   | -0.60                                        | -0.43                          | 0.62              | 21.20                 |
| Q6FI81            | Anamorsin;                                                 | -0.47                                        | -0.16                          | 0.57              | 8.30                  |
| P03950            | Angiogenin;                                                | 2.34                                         | 0.15                           | 0.00              | 6.10                  |
| P07355            | Annexin A2;                                                | -0.62                                        | -0.14                          | 0.41              | 52.80                 |
| P09525            | Annexin A4;                                                | -1.47                                        | -1.14                          | 0.27              | 6.60                  |
| P08758            | Annexin A5;                                                | -0.84                                        | -0.39                          | 0.38              | 25.90                 |
| P46013            | Antigen KI-67;                                             | 0.99                                         | 0.36                           | 0.30              | 6.30                  |
| Q10567            | AP-1 complex subunit beta-1;                               | -0.51                                        | -0.35                          | 0.66              | 3.70                  |
| O95782            | AP-2 complex subunit alpha-1;                              | -0.32                                        | -0.08                          | 0.67              | 3.40                  |
| Q96CW1            | AP-2 complex subunit mu;                                   | -0.14                                        | -0.02                          | 0.81              | 3.90                  |
| O00203            | AP-3 complex subunit beta-1;                               | 0.62                                         | 0.02                           | 0.44              | 0.90                  |
| P02656            | Apolipoprotein C-III;                                      | 0.77                                         | 0.13                           | 0.35              | 16.20                 |
| Q9BZZ5            | Apoptosis inhibitor 5;                                     | -0.47                                        | -0.21                          | 0.60              | 4.20                  |
| Q07812            | Apoptosis regulator BAX;                                   | 0.35                                         | 0.21                           | 0.78              | 13.00                 |
| Q9UKV3            | Apoptotic chromatin condensation inducer in the nucleus;   | 1.02                                         | 0.19                           | 0.21              | 2.10                  |
| P54136            | Arginine--tRNA ligase, cytoplasmic;                        | -0.72                                        | -0.25                          | 0.39              | 5.00                  |
| P04424            | Argininosuccinate lyase;                                   | -0.56                                        | -0.11                          | 0.44              | 3.00                  |
| P00966            | Argininosuccinate synthase;                                | -0.96                                        | -0.33                          | 0.27              | 11.40                 |
| P17174            | Aspartate aminotransferase, cytoplasmic;                   | -1.90                                        | -3.40                          | 0.48              | 10.90                 |
| P00505            | Aspartate aminotransferase, mitochondrial;                 | 0.23                                         | 0.04                           | 0.81              | 20.70                 |
| P14868            | Aspartate--tRNA ligase, cytoplasmic;                       | 1.02                                         | 0.86                           | 0.50              | 4.00                  |
| Q12797            | Aspartyl/asparaginyl beta-hydroxylase;                     | 7.98                                         | 2.35                           | 0.00              | 2.40                  |
| Q8WWM7            | Ataxin-2-like protein;                                     | -1.56                                        | -0.18                          | 0.03              | 1.10                  |
| Q99700            | Ataxin-2;                                                  | 1.86                                         | 0.40                           | 0.02              | 0.80                  |
| P25705            | ATP synthase subunit alpha, mitochondrial;                 | 3.53                                         | 5.01                           | 0.12              | 14.10                 |
| P06576            | ATP synthase subunit beta, mitochondrial;                  | 3.70                                         | 3.04                           | 0.01              | 23.60                 |
| O75947            | ATP synthase subunit d, mitochondrial;                     | 1.89                                         | 0.12                           | 0.01              | 12.40                 |
| P30049            | ATP synthase subunit delta, mitochondrial;                 | 5.01                                         | 4.58                           | 0.00              | 8.30                  |
| P48047            | ATP synthase subunit O, mitochondrial;                     | -1.79                                        | -0.25                          | 0.02              | 13.10                 |
| P18859            | ATP synthase-coupling factor 6, mitochondrial;             | 2.56                                         | 0.13                           | 0.00              | 8.30                  |
| Q8NE71            | ATP-binding cassette sub-family F member 1;                | -0.22                                        | -0.03                          | 0.73              | 3.70                  |
| Q9UG63            | ATP-binding cassette sub-family F member 2;                | -0.16                                        | -0.01                          | 0.78              | 1.60                  |

Table S2

| Uniprot accession | Name                                                     | Fold-change (log <sub>2</sub> ) of ASPAratio | Fold-change standard deviation | ASPAratio p-value | Sequence coverage (%) |
|-------------------|----------------------------------------------------------|----------------------------------------------|--------------------------------|-------------------|-----------------------|
| P53396            | ATP-citrate synthase;                                    | -1.14                                        | -0.53                          | 0.24              | 19.30                 |
| Q08211            | ATP-dependent RNA helicase A;                            | 2.09                                         | 1.75                           | 0.16              | 7.70                  |
| Q92499            | ATP-dependent RNA helicase DDX1;                         | -0.39                                        | -0.06                          | 0.56              | 2.30                  |
| Q9NUU7            | ATP-dependent RNA helicase DDX19A;                       | 0.42                                         | 0.05                           | 0.62              | 4.40                  |
| Q9GZR7            | ATP-dependent RNA helicase DDX24;                        | 5.45                                         | 2.80                           | 0.00              | 1.60                  |
| O00148            | ATP-dependent RNA helicase DDX39A;                       | -0.21                                        | -0.02                          | 0.74              | 15.20                 |
| Q86XP3            | ATP-dependent RNA helicase DDX42;                        | 0.40                                         | 0.05                           | 0.64              | 3.30                  |
| Q9NVI7            | ATPase family AAA domain-containing protein 3A;          | 4.02                                         | 1.39                           | 0.00              | 4.90                  |
| O95816            | BAG family molecular chaperone regulator 2;              | 0.65                                         | 0.06                           | 0.42              | 5.20                  |
| O95817            | BAG family molecular chaperone regulator 3;              | -0.21                                        | -0.03                          | 0.75              | 2.30                  |
| Q9H4G0            | Band 4.1-like protein 1;                                 | 1.23                                         | 0.18                           | 0.12              | 1.20                  |
| P50895            | Basal cell adhesion molecule;                            | -0.82                                        | -1.03                          | 0.67              | 19.40                 |
| Q7L1Q6            | Basic leucine zipper and W2 domain-containing protein 1; | -0.69                                        | -0.05                          | 0.31              | 2.40                  |
| Q9Y6E2            | Basic leucine zipper and W2 domain-containing protein 2; | 0.28                                         | 0.08                           | 0.78              | 4.50                  |
| P35613            | Basigin;                                                 | 1.26                                         | 0.11                           | 0.10              | 3.60                  |
| P15291            | Beta-1,4-galactosyltransferase 1;                        | 0.25                                         | 0.02                           | 0.79              | 8.00                  |
| O60512            | Beta-1,4-galactosyltransferase 3;                        | 0.19                                         | 0.01                           | 0.84              | 2.00                  |
| O60513            | Beta-1,4-galactosyltransferase 4;                        | -2.14                                        | -2.54                          | 0.25              | 9.90                  |
| P02749            | Beta-2-glycoprotein 1;                                   | 0.80                                         | 0.34                           | 0.43              | 5.20                  |
| P61769            | Beta-2-microglobulin;                                    | 0.46                                         | 0.03                           | 0.57              | 16.80                 |
| P16278            | Beta-galactosidase;                                      | -0.41                                        | -0.16                          | 0.62              | 15.50                 |
| P08236            | Beta-glucuronidase;                                      | 1.70                                         | 1.98                           | 0.38              | 2.80                  |
| P07686            | Beta-hexosaminidase subunit beta;                        | 0.32                                         | 0.07                           | 0.73              | 24.60                 |
| O43252            | Bifunctional 3'-phosphoadenosine 5'-phosphosulfate synth | -1.14                                        | -0.20                          | 0.13              | 1.90                  |
| P53004            | Biliverdin reductase A;                                  | -0.24                                        | -0.01                          | 0.70              | 2.70                  |
| Q9H3K6            | BolA-like protein 2;                                     | -0.28                                        | -0.04                          | 0.67              | 18.60                 |
| P13497            | Bone morphogenetic protein 1;                            | -0.32                                        | -0.06                          | 0.65              | 8.40                  |
| P22003            | Bone morphogenetic protein 5;                            | 3.12                                         | 0.54                           | 0.00              | 2.20                  |
| Q9P287            | BRCA2 and CDKN1A-interacting protein;                    | 0.90                                         | 0.04                           | 0.24              | 2.90                  |
| Q9NQY0            | Bridging integrator 3;                                   | 3.12                                         | 0.20                           | 0.00              | 3.60                  |
| O60885            | Bromodomain-containing protein 4;                        | -1.47                                        | -0.24                          | 0.05              | 1.80                  |
| P11586            | C-1-tetrahydrofolate synthase, cytoplasmic;              | -0.28                                        | -0.15                          | 0.76              | 15.40                 |
| Q99417            | C-Myc-binding protein;                                   | -0.79                                        | -0.11                          | 0.28              | 19.40                 |
| P56545            | C-terminal-binding protein 2;                            | -0.32                                        | -0.21                          | 0.77              | 4.30                  |
| Q9UBG0            | C-type mannose receptor 2;                               | -3.15                                        | -1.95                          | 0.01              | 1.80                  |
| P80162            | C-X-C motif chemokine 6;                                 | 2.23                                         | 0.27                           | 0.00              | 10.50                 |
| Q96EU7            | C1GALT1-specific chaperone 1;                            | 4.80                                         | 0.71                           | 0.00              | 2.80                  |
| P05937            | Calbindin;                                               | 1.61                                         | 0.10                           | 0.03              | 4.20                  |
| P63098            | Calcineurin subunit B type 1;                            | 0.71                                         | 0.11                           | 0.38              | 5.90                  |
| Q6NUK1            | Calcium-binding mitochondrial carrier protein SCaMC-1;   | 2.92                                         | 1.54                           | 0.01              | 6.50                  |
| Q9Y2V2            | Calcium-regulated heat stable protein 1;                 | -1.04                                        | -0.11                          | 0.14              | 10.90                 |
| Q9HB71            | Calcyclin-binding protein;                               | 0.30                                         | 0.13                           | 0.80              | 11.00                 |
| Q05682            | Caldesmon;                                               | -2.69                                        | -2.60                          | 0.09              | 7.80                  |
| P62158            | Calmodulin;                                              | 0.38                                         | 0.12                           | 0.70              | 13.40                 |
| P27824            | Calnexin;                                                | 3.91                                         | 0.89                           | 0.00              | 6.60                  |
| P17655            | Calpain-2 catalytic subunit;                             | -0.24                                        | -0.18                          | 0.83              | 2.10                  |
| P27797            | Calreticulin;                                            | 1.11                                         | 0.09                           | 0.15              | 7.90                  |
| O43852            | Calumenin;                                               | 0.81                                         | 0.28                           | 0.39              | 20.00                 |
| P10644            | cAMP-dependent protein kinase type I-alpha regulatory su | -0.41                                        | -0.33                          | 0.74              | 9.70                  |
| P30622            | CAP-Gly domain-containing linker protein 1;              | -0.22                                        | -0.10                          | 0.79              | 0.80                  |
| Q14444            | Caprin-1;                                                | -0.26                                        | -0.01                          | 0.68              | 1.60                  |
| Q8NCH0            | Carbohydrate sulfotransferase 14;                        | -0.72                                        | -0.34                          | 0.45              | 18.90                 |
| P16152            | Carbonyl reductase [NADPH] 1;                            | -4.01                                        | -7.77                          | 0.17              | 10.10                 |
| Q96DG6            | Carboxymethylenebutenolidase homolog;                    | 0.34                                         | 0.11                           | 0.73              | 6.50                  |
| P19784            | Casein kinase II subunit alpha';                         | 2.13                                         | 0.23                           | 0.01              | 3.70                  |
| P67870            | Casein kinase II subunit beta;                           | 0.94                                         | 0.15                           | 0.24              | 6.50                  |
| P07339            | Cathepsin D;                                             | -0.65                                        | -1.03                          | 0.78              | 29.40                 |

Table S2

| Uniprot accession | Name                                                       | Fold-change (log <sub>2</sub> ) of ASPAratio | Fold-change standard deviation | ASPAratio p-value | Sequence coverage (%) |
|-------------------|------------------------------------------------------------|----------------------------------------------|--------------------------------|-------------------|-----------------------|
| P07711            | Cathepsin L1;                                              | 2.32                                         | 0.59                           | 0.01              | 13.50                 |
| P11717            | Cation-independent mannose-6-phosphate receptor;           | 0.42                                         | 0.11                           | 0.65              | 5.70                  |
| Q03135            | Caveolin-1;                                                | -0.65                                        | -0.07                          | 0.36              | 7.90                  |
| Q6YHK3            | CD109 antigen;                                             | 0.70                                         | 0.16                           | 0.41              | 10.90                 |
| Q13740            | CD166 antigen;                                             | 1.07                                         | 0.20                           | 0.19              | 13.60                 |
| Q9Y5K6            | CD2-associated protein;                                    | -0.45                                        | -0.03                          | 0.51              | 1.40                  |
| P16070            | CD44 antigen;                                              | -1.18                                        | -0.58                          | 0.25              | 9.80                  |
| P13987            | CD59 glycoprotein;                                         | 2.23                                         | 0.19                           | 0.00              | 9.40                  |
| P60033            | CD81 antigen;                                              | -0.33                                        | -0.04                          | 0.62              | 8.50                  |
| P60953            | Cell division control protein 42 homolog;                  | 0.48                                         | 0.07                           | 0.57              | 8.90                  |
| Q99459            | Cell division cycle 5-like protein;                        | 3.06                                         | 0.34                           | 0.00              | 3.20                  |
| Q99674            | Cell growth regulator with EF hand domain protein 1;       | -0.22                                        | -0.07                          | 0.76              | 15.60                 |
| Q5SW79            | Centrosomal protein of 170 kDa;                            | 10.01                                        | 2.83                           | 0.00              | 0.90                  |
| Q53EZ4            | Centrosomal protein of 55 kDa;                             | 1.09                                         | 0.13                           | 0.16              | 2.80                  |
| O00299            | Chloride intracellular channel protein 1;                  | 0.34                                         | 0.07                           | 0.71              | 32.00                 |
| Q9Y696            | Chloride intracellular channel protein 4;                  | -0.21                                        | -0.03                          | 0.75              | 17.40                 |
| Q6UVK1            | Chondroitin sulfate proteoglycan 4;                        | -0.65                                        | -0.26                          | 0.47              | 4.20                  |
| Q13185            | Chromobox protein homolog 3;                               | 0.46                                         | 0.17                           | 0.65              | 28.40                 |
| P45973            | Chromobox protein homolog 5;                               | 0.88                                         | 0.31                           | 0.36              | 22.50                 |
| O75390            | Citrate synthase, mitochondrial;                           | 0.59                                         | 0.22                           | 0.55              | 10.10                 |
| Q00610            | Clathrin heavy chain 1;                                    | 0.77                                         | 0.25                           | 0.41              | 5.30                  |
| P09496            | Clathrin light chain A;                                    | 0.59                                         | 0.26                           | 0.58              | 9.70                  |
| Q10570            | Cleavage and polyadenylation specificity factor subunit 1; | 0.25                                         | 0.01                           | 0.79              | 0.70                  |
| O95639            | Cleavage and polyadenylation specificity factor subunit 4; | -1.43                                        | -0.12                          | 0.05              | 3.30                  |
| Q16630            | Cleavage and polyadenylation specificity factor subunit 6; | -1.96                                        | -0.15                          | 0.01              | 2.50                  |
| P33240            | Cleavage stimulation factor subunit 2;                     | -1.28                                        | -0.22                          | 0.09              | 3.80                  |
| Q7Z460            | CLIP-associating protein 1;                                | -0.41                                        | -0.07                          | 0.55              | 1.70                  |
| P10909            | Clusterin;                                                 | -1.47                                        | -1.47                          | 0.36              | 27.40                 |
| Q14019            | Coactosin-like protein;                                    | -0.87                                        | -0.19                          | 0.25              | 22.50                 |
| P48444            | Coatomer subunit delta;                                    | -0.49                                        | -0.04                          | 0.47              | 2.20                  |
| O14579            | Coatomer subunit epsilon;                                  | -0.21                                        | -0.04                          | 0.75              | 3.60                  |
| O43405            | Cochlin;                                                   | 3.18                                         | 2.48                           | 0.02              | 11.80                 |
| P23528            | Cofilin-1;                                                 | -0.22                                        | -0.05                          | 0.74              | 45.20                 |
| Q96CT7            | Coiled-coil domain-containing protein 124;                 | -0.22                                        | -0.02                          | 0.72              | 5.80                  |
| Q9NX63            | Coiled-coil-helix-coiled-coil-helix domain-containing prot | 1.82                                         | 0.14                           | 0.02              | 4.80                  |
| O75534            | Cold shock domain-containing protein E1;                   | -0.45                                        | -0.15                          | 0.58              | 1.50                  |
| Q14011            | Cold-inducible RNA-binding protein;                        | 0.84                                         | 0.31                           | 0.39              | 20.90                 |
| P02462            | Collagen alpha-1(IV) chain;                                | 1.55                                         | 0.20                           | 0.05              | 0.80                  |
| P12109            | Collagen alpha-1(VI) chain;                                | 1.26                                         | 0.45                           | 0.18              | 16.40                 |
| Q99715            | Collagen alpha-1(XII) chain;                               | -1.47                                        | -0.81                          | 0.17              | 8.00                  |
| P39060            | Collagen alpha-1(XVIII) chain;                             | 1.03                                         | 0.24                           | 0.22              | 2.10                  |
| P05997            | Collagen alpha-2(V) chain;                                 | 4.65                                         | 5.70                           | 0.02              | 4.70                  |
| P00736            | Complement C1r subcomponent;                               | 0.95                                         | 0.71                           | 0.50              | 12.30                 |
| P09871            | Complement C1s subcomponent;                               | 1.76                                         | 0.09                           | 0.02              | 1.60                  |
| P01024            | Complement C3;                                             | 2.61                                         | 1.53                           | 0.02              | 33.00                 |
| Q07021            | Complement component 1 Q subcomponent-binding prote        | 1.20                                         | 0.18                           | 0.13              | 11.70                 |
| P00751            | Complement factor B;                                       | -0.26                                        | -0.10                          | 0.74              | 8.10                  |
| P00746            | Complement factor D;                                       | 1.66                                         | 0.22                           | 0.03              | 8.70                  |
| P29279            | Connective tissue growth factor;                           | -1.96                                        | -1.44                          | 0.13              | 10.00                 |
| Q13098            | COP9 signalosome complex subunit 1;                        | 0.59                                         | 0.24                           | 0.56              | 4.50                  |
| Q9BT78            | COP9 signalosome complex subunit 4;                        | -0.53                                        | -0.20                          | 0.53              | 6.20                  |
| Q92905            | COP9 signalosome complex subunit 5;                        | -0.14                                        | -0.02                          | 0.80              | 4.50                  |
| P36551            | Coproporphyrinogen-III oxidase, mitochondrial;             | -0.35                                        | -0.03                          | 0.60              | 3.70                  |
| O75367            | Core histone macro-H2A.1;                                  | 1.60                                         | 1.22                           | 0.25              | 8.90                  |
| P31146            | Coronin-1A;                                                | -0.37                                        | -0.06                          | 0.59              | 2.20                  |
| Q9BR76            | Coronin-1B;                                                | -0.65                                        | -0.20                          | 0.43              | 5.90                  |
| Q9ULV4            | Coronin-1C;                                                | 0.26                                         | 0.01                           | 0.77              | 2.10                  |

Table S2

| Uniprot accession | Name                                                     | Fold-change (log <sub>2</sub> ) of ASAPratio | Fold-change standard deviation | ASAPratio p-value | Sequence coverage (%) |
|-------------------|----------------------------------------------------------|----------------------------------------------|--------------------------------|-------------------|-----------------------|
| Q9P1F3            | Costars family protein ABRACL;                           | -0.32                                        | -0.06                          | 0.65              | 16.00                 |
| P12277            | Creatine kinase B-type;                                  | 2.38                                         | 2.95                           | 0.24              | 34.60                 |
| Q92793            | CREB-binding protein;                                    | -2.21                                        | -0.10                          | 0.00              | 0.40                  |
| P46109            | Crk-like protein;                                        | -0.62                                        | -0.11                          | 0.39              | 10.60                 |
| Q86VP6            | Cullin-associated NEDD8-dissociated protein 1;           | -0.82                                        | -0.49                          | 0.46              | 10.50                 |
| O15320            | Cutaneous T-cell lymphoma-associated antigen 5;          | 1.74                                         | 4.98                           | 0.70              | 3.20                  |
| P18846            | Cyclic AMP-dependent transcription factor ATF-1;         | -5.57                                        | 0.00                           | 0.00              | 2.60                  |
| P61024            | Cyclin-dependent kinases regulatory subunit 1;           | -0.33                                        | -0.02                          | 0.61              | 12.70                 |
| P33552            | Cyclin-dependent kinases regulatory subunit 2;           | -1.85                                        | -0.80                          | 0.05              | 24.10                 |
| P01034            | Cystatin-C;                                              | 1.86                                         | 0.35                           | 0.02              | 30.10                 |
| Q9UHD1            | Cysteine and histidine-rich domain-containing protein 1; | -0.69                                        | -0.44                          | 0.53              | 7.20                  |
| P49589            | Cysteine--tRNA ligase, cytoplasmic;                      | 0.58                                         | 0.78                           | 0.80              | 2.40                  |
| Q9NZV1            | Cysteine-rich motor neuron 1 protein;                    | -0.41                                        | -0.10                          | 0.57              | 10.40                 |
| P31930            | Cytochrome b-c1 complex subunit 1, mitochondrial;        | 3.36                                         | 3.63                           | 0.06              | 16.50                 |
| P22695            | Cytochrome b-c1 complex subunit 2, mitochondrial;        | 3.12                                         | 0.43                           | 0.00              | 3.50                  |
| Q9UDW1            | Cytochrome b-c1 complex subunit 9;                       | 2.81                                         | 0.58                           | 0.00              | 27.00                 |
| P47985            | Cytochrome b-c1 complex subunit Rieske, mitochondrial;   | 3.02                                         | 0.31                           | 0.00              | 5.10                  |
| O43169            | Cytochrome b5 type B;                                    | -0.41                                        | -0.04                          | 0.54              | 8.20                  |
| P00167            | Cytochrome b5;                                           | 3.65                                         | 2.49                           | 0.00              | 26.10                 |
| P13073            | Cytochrome c oxidase subunit 4 isoform 1, mitochondrial; | 3.51                                         | 0.33                           | 0.00              | 6.50                  |
| P10606            | Cytochrome c oxidase subunit 5B, mitochondrial;          | 3.45                                         | 1.50                           | 0.00              | 17.80                 |
| P14854            | Cytochrome c oxidase subunit 6B1;                        | 3.96                                         | 3.22                           | 0.01              | 26.70                 |
| P14406            | Cytochrome c oxidase subunit 7A2, mitochondrial;         | 0.72                                         | 1.54                           | 0.83              | 27.70                 |
| P99999            | Cytochrome c;                                            | -0.84                                        | -0.29                          | 0.31              | 24.80                 |
| Q14204            | Cytoplasmic dynein 1 heavy chain 1;                      | 0.32                                         | 0.17                           | 0.80              | 1.70                  |
| Q13409            | Cytoplasmic dynein 1 intermediate chain 2;               | -0.22                                        | -0.13                          | 0.81              | 5.00                  |
| Q07065            | Cytoskeleton-associated protein 4;                       | 3.02                                         | 2.23                           | 0.02              | 5.60                  |
| P28838            | Cytosol aminopeptidase;                                  | -0.41                                        | -0.26                          | 0.70              | 4.60                  |
| O00154            | Cytosolic acyl coenzyme A thioester hydrolase;           | -1.04                                        | -0.50                          | 0.29              | 12.40                 |
| Q96KP4            | Cytosolic non-specific dipeptidase;                      | -0.53                                        | -0.35                          | 0.63              | 13.30                 |
| O43175            | D-3-phosphoglycerate dehydrogenase;                      | 0.63                                         | 0.08                           | 0.44              | 6.00                  |
| P30046            | D-dopachrome decarboxylase;                              | -0.21                                        | -0.11                          | 0.82              | 16.10                 |
| Q8N163            | DBIRD complex subunit KIAA1967;                          | -1.60                                        | -2.23                          | 0.45              | 4.00                  |
| Q5BKZ1            | DBIRD complex subunit ZNF326;                            | 1.22                                         | 0.55                           | 0.24              | 4.30                  |
| Q9H773            | dCTP pyrophosphatase 1;                                  | -1.14                                        | -0.58                          | 0.27              | 11.20                 |
| P33316            | Deoxyuridine 5'-triphosphate nucleotidohydrolase, mitoch | -0.32                                        | -0.06                          | 0.65              | 31.00                 |
| Q14126            | Desmoglein-2;                                            | -0.65                                        | -0.25                          | 0.46              | 3.40                  |
| P60981            | Destrin;                                                 | -0.84                                        | -0.12                          | 0.24              | 14.50                 |
| Q9Y295            | Developmentally-regulated GTP-binding protein 1;         | -1.14                                        | -0.08                          | 0.11              | 8.20                  |
| Q9NR28            | Diablo homolog, mitochondrial;                           | 0.25                                         | 0.02                           | 0.79              | 4.60                  |
| O94907            | Dickkopf-related protein 1;                              | 1.65                                         | 0.93                           | 0.15              | 25.90                 |
| P09622            | Dihydrolipoyl dehydrogenase, mitochondrial;              | 0.84                                         | 0.04                           | 0.28              | 10.40                 |
| P09417            | Dihydropteridine reductase;                              | -0.96                                        | -0.30                          | 0.26              | 15.60                 |
| Q16555            | Dihydropyrimidinase-related protein 2;                   | 0.30                                         | 0.12                           | 0.78              | 11.70                 |
| P53634            | Dipeptidyl peptidase 1;                                  | 2.26                                         | 0.50                           | 0.01              | 13.40                 |
| Q9UHL4            | Dipeptidyl peptidase 2;                                  | 0.72                                         | 0.29                           | 0.47              | 15.70                 |
| Q9NY33            | Dipeptidyl peptidase 3;                                  | 0.80                                         | 1.70                           | 0.82              | 3.70                  |
| Q13444            | Disintegrin and metalloproteinase domain-containing prot | 0.34                                         | 0.03                           | 0.69              | 5.30                  |
| Q12959            | Disks large homolog 1;                                   | 1.34                                         | 0.42                           | 0.14              | 2.30                  |
| P26358            | DNA (cytosine-5)-methyltransferase 1;                    | -0.26                                        | -0.02                          | 0.68              | 0.70                  |
| O00273            | DNA fragmentation factor subunit alpha;                  | -0.33                                        | -0.04                          | 0.62              | 5.10                  |
| Q9ULG1            | DNA helicase INO80;                                      | 3.85                                         | 0.70                           | 0.00              | 0.70                  |
| P18858            | DNA ligase 1;                                            | -2.35                                        | -3.00                          | 0.23              | 3.00                  |
| P43246            | DNA mismatch repair protein Msh2;                        | 0.64                                         | 0.03                           | 0.42              | 0.90                  |
| Q15054            | DNA polymerase delta subunit 3;                          | -0.90                                        | -0.37                          | 0.32              | 2.80                  |
| P18887            | DNA repair protein XRCC1;                                | -1.74                                        | -0.23                          | 0.02              | 3.80                  |
| P33993            | DNA replication licensing factor MCM7;                   | -0.22                                        | -0.08                          | 0.77              | 4.60                  |

Table S2

| Uniprot accession | Name                                                      | Fold-change (log <sub>2</sub> ) of ASPAratio | Fold-change standard deviation | ASPAratio p-value | Sequence coverage (%) |
|-------------------|-----------------------------------------------------------|----------------------------------------------|--------------------------------|-------------------|-----------------------|
| P11387            | DNA topoisomerase 1;                                      | 0.78                                         | 1.01                           | 0.72              | 2.90                  |
| P27695            | DNA-(apurinic or apyrimidinic site) lyase;                | 0.89                                         | 0.12                           | 0.26              | 9.40                  |
| P16989            | DNA-binding protein A;                                    | 0.42                                         | 0.04                           | 0.61              | 13.70                 |
| O15160            | DNA-directed RNA polymerases I and III subunit RPAC1;     | 0.66                                         | 0.08                           | 0.41              | 3.80                  |
| P52434            | DNA-directed RNA polymerases I, II, and III subunit RPA   | 0.92                                         | 0.09                           | 0.24              | 8.70                  |
| Q8WXX5            | DnaJ homolog subfamily C member 9;                        | 0.53                                         | 0.30                           | 0.66              | 15.40                 |
| P04843            | Dolichyl-diphosphooligosaccharide--protein glycosyltrans  | 3.04                                         | 2.57                           | 0.04              | 4.60                  |
| O95793            | Double-stranded RNA-binding protein Staufen homolog 1     | 0.27                                         | 0.02                           | 0.76              | 4.50                  |
| Q9UJU6            | Drebrin-like protein;                                     | -2.90                                        | -0.22                          | 0.00              | 3.30                  |
| Q16643            | Drebrin;                                                  | 1.77                                         | 0.36                           | 0.03              | 4.30                  |
| P51452            | Dual specificity protein phosphatase 3;                   | -0.32                                        | -0.10                          | 0.68              | 12.40                 |
| Q13561            | Dynaactin subunit 2;                                      | 0.35                                         | 0.22                           | 0.79              | 12.20                 |
| O00429            | Dynamamin-1-like protein;                                 | -0.90                                        | -0.03                          | 0.19              | 1.40                  |
| Q96FJ2            | Dynein light chain 2, cytoplasmic;                        | 0.55                                         | 0.32                           | 0.66              | 32.60                 |
| Q8TF09            | Dynein light chain roadblock-type 2;                      | -1.28                                        | -0.16                          | 0.08              | 12.50                 |
| Q14118            | Dystroglycan;                                             | 0.34                                         | 0.09                           | 0.72              | 9.80                  |
| Q9Y4X5            | E3 ubiquitin-protein ligase ARIH1;                        | -0.56                                        | -0.09                          | 0.43              | 2.00                  |
| Q14258            | E3 ubiquitin/ISG15 ligase TRIM25;                         | -1.18                                        | -1.11                          | 0.45              | 12.90                 |
| Q15075            | Early endosome antigen 1;                                 | 2.22                                         | 0.68                           | 0.01              | 6.20                  |
| Q96C19            | EF-hand domain-containing protein D2;                     | 0.58                                         | 0.15                           | 0.52              | 8.30                  |
| Q9H4M9            | EH domain-containing protein 1;                           | 0.55                                         | 0.12                           | 0.53              | 7.30                  |
| Q15717            | ELAV-like protein 1;                                      | 1.81                                         | 1.94                           | 0.32              | 15.60                 |
| P68104            | Elongation factor 1-alpha 1;                              | -0.22                                        | -0.09                          | 0.78              | 14.90                 |
| Q05639            | Elongation factor 1-alpha 2;                              | 5.03                                         | 0.68                           | 0.00              | 11.00                 |
| P29692            | Elongation factor 1-delta;                                | -0.33                                        | -0.09                          | 0.66              | 17.40                 |
| P26641            | Elongation factor 1-gamma;                                | -0.69                                        | -0.68                          | 0.65              | 13.00                 |
| P13639            | Elongation factor 2;                                      | -0.53                                        | -0.22                          | 0.54              | 16.40                 |
| P50402            | Emerin;                                                   | -1.14                                        | -0.70                          | 0.32              | 9.80                  |
| Q99961            | Endophilin-A2;                                            | 0.60                                         | 0.09                           | 0.46              | 5.40                  |
| P30040            | Endoplasmic reticulum resident protein 29;                | 1.48                                         | 0.81                           | 0.19              | 21.80                 |
| P14625            | Endoplasmic reticulum chaperone BiP;                      | 1.68                                         | 0.68                           | 0.08              | 10.80                 |
| Q9UNN8            | Endothelial protein C receptor;                           | -0.77                                        | -0.08                          | 0.28              | 20.60                 |
| P84090            | Enhancer of rudimentary homolog;                          | 0.74                                         | 0.06                           | 0.35              | 26.90                 |
| P42126            | Enoyl-CoA delta isomerase 1, mitochondrial;               | 1.04                                         | 0.18                           | 0.20              | 4.30                  |
| P30084            | Enoyl-CoA hydratase, mitochondrial;                       | 2.69                                         | 0.72                           | 0.00              | 5.90                  |
| P20827            | Ephrin-A1;                                                | -0.56                                        | -0.02                          | 0.41              | 8.30                  |
| P98172            | Ephrin-B1;                                                | -0.24                                        | -0.03                          | 0.70              | 5.80                  |
| P52799            | Ephrin-B2;                                                | -0.24                                        | -0.08                          | 0.75              | 14.10                 |
| P00533            | Epidermal growth factor receptor;                         | -1.39                                        | -1.83                          | 0.49              | 11.20                 |
| P61916            | Epididymal secretory protein E1;                          | 1.14                                         | 0.46                           | 0.25              | 39.70                 |
| Q9Y2E5            | Epididymis-specific alpha-mannosidase;                    | -1.18                                        | -0.80                          | 0.33              | 5.40                  |
| Q96HE7            | ERO1-like protein alpha;                                  | -1.39                                        | -2.01                          | 0.53              | 6.00                  |
| Q9H501            | ESF1 homolog;                                             | 2.43                                         | 2.29                           | 0.13              | 4.90                  |
| P60842            | Eukaryotic initiation factor 4A-I;                        | 0.82                                         | 0.18                           | 0.33              | 16.00                 |
| Q14240            | Eukaryotic initiation factor 4A-II;                       | -0.77                                        | -0.09                          | 0.29              | 10.10                 |
| P38919            | Eukaryotic initiation factor 4A-III;                      | 2.84                                         | 1.68                           | 0.01              | 5.40                  |
| P15170            | Eukaryotic peptide chain release factor GTP-binding subu  | -0.19                                        | -0.10                          | 0.83              | 3.80                  |
| P62495            | Eukaryotic peptide chain release factor subunit 1;        | -0.14                                        | -0.04                          | 0.82              | 15.30                 |
| O14602            | Eukaryotic translation initiation factor 1A, Y-chromosoma | -0.99                                        | -0.63                          | 0.39              | 14.60                 |
| P05198            | Eukaryotic translation initiation factor 2 subunit 1;     | 0.30                                         | 0.06                           | 0.74              | 25.70                 |
| P20042            | Eukaryotic translation initiation factor 2 subunit 2;     | 4.35                                         | 0.63                           | 0.00              | 3.00                  |
| P41091            | Eukaryotic translation initiation factor 2 subunit 3;     | -0.60                                        | -0.49                          | 0.65              | 8.90                  |
| Q9BY44            | Eukaryotic translation initiation factor 2A;              | -1.08                                        | -0.20                          | 0.15              | 9.60                  |
| Q14152            | Eukaryotic translation initiation factor 3 subunit A;     | 0.49                                         | 0.38                           | 0.75              | 3.90                  |
| Q99613            | Eukaryotic translation initiation factor 3 subunit C;     | -0.79                                        | -0.72                          | 0.58              | 6.00                  |
| P60228            | Eukaryotic translation initiation factor 3 subunit E;     | -0.21                                        | -0.05                          | 0.76              | 8.80                  |
| O75821            | Eukaryotic translation initiation factor 3 subunit G;     | 0.42                                         | 0.26                           | 0.74              | 18.80                 |

Table S2

| Uniprot accession | Name                                                    | Fold-change (log <sub>2</sub> ) of ASPAratio | Fold-change standard deviation | ASPAratio p-value | Sequence coverage (%) |
|-------------------|---------------------------------------------------------|----------------------------------------------|--------------------------------|-------------------|-----------------------|
| Q13347            | Eukaryotic translation initiation factor 3 subunit I;   | 0.27                                         | 0.07                           | 0.79              | 12.60                 |
| O75822            | Eukaryotic translation initiation factor 3 subunit J;   | -0.67                                        | -0.29                          | 0.46              | 11.60                 |
| Q9UBQ5            | Eukaryotic translation initiation factor 3 subunit K;   | -2.08                                        | -0.09                          | 0.00              | 11.50                 |
| Q9Y262            | Eukaryotic translation initiation factor 3 subunit L;   | -0.45                                        | -0.15                          | 0.58              | 5.30                  |
| P55010            | Eukaryotic translation initiation factor 5;             | 4.66                                         | 0.24                           | 0.00              | 2.30                  |
| P56537            | Eukaryotic translation initiation factor 6;             | 0.88                                         | 0.07                           | 0.26              | 8.60                  |
| Q15024            | Exosome complex component RRP42;                        | 0.37                                         | 0.03                           | 0.66              | 4.10                  |
| Q16394            | Exostosin-1;                                            | -1.08                                        | -0.52                          | 0.28              | 2.80                  |
| O14980            | Exportin-1;                                             | -1.04                                        | -0.80                          | 0.42              | 2.60                  |
| P55060            | Exportin-2;                                             | 0.25                                         | 0.04                           | 0.80              | 3.80                  |
| Q9BSJ8            | Extended synaptotagmin-1;                               | 0.74                                         | 0.08                           | 0.36              | 1.40                  |
| Q16610            | Extracellular matrix protein 1;                         | 0.75                                         | 0.16                           | 0.38              | 15.70                 |
| P15311            | Ezrin;                                                  | -0.84                                        | -0.20                          | 0.27              | 14.00                 |
| P52907            | F-actin-capping protein subunit alpha-1;                | 0.19                                         | 0.02                           | 0.84              | 17.80                 |
| P47756            | F-actin-capping protein subunit beta;                   | 0.26                                         | 0.09                           | 0.82              | 17.70                 |
| O60907            | F-box-like/WD repeat-containing protein TBL1X;          | 0.50                                         | 0.06                           | 0.55              | 2.50                  |
| Q9Y5B9            | FACT complex subunit SPT16;                             | 1.85                                         | 0.58                           | 0.04              | 8.60                  |
| Q08945            | FACT complex subunit SSRP1;                             | 0.89                                         | 0.78                           | 0.57              | 9.90                  |
| Q96AE4            | Far upstream element-binding protein 1;                 | 0.60                                         | 0.98                           | 0.83              | 4.80                  |
| P14324            | Farnesyl pyrophosphate synthase;                        | 0.55                                         | 0.06                           | 0.50              | 14.80                 |
| Q9UNN5            | FAS-associated factor 1;                                | -0.47                                        | -0.44                          | 0.75              | 4.60                  |
| Q01469            | Fatty acid-binding protein, epidermal;                  | -0.16                                        | -0.03                          | 0.79              | 37.00                 |
| Q96AC1            | Fermitin family homolog 2;                              | 0.88                                         | 0.89                           | 0.61              | 5.10                  |
| P02794            | Ferritin heavy chain;                                   | -0.62                                        | -0.14                          | 0.41              | 18.60                 |
| Q14512            | Fibroblast growth factor-binding protein 1;             | -0.69                                        | -0.13                          | 0.34              | 18.40                 |
| P02751            | Fibronectin;                                            | -2.28                                        | -1.99                          | 0.11              | 3.10                  |
| P21333            | Filamin-A;                                              | 0.25                                         | 0.10                           | 0.84              | 26.10                 |
| Q14315            | Filamin-C;                                              | -0.77                                        | -0.39                          | 0.45              | 14.70                 |
| P30043            | Flavin reductase (NADPH);                               | -0.79                                        | -0.08                          | 0.27              | 4.90                  |
| Q96CP2            | FLYWCH family member 2;                                 | 0.46                                         | 0.08                           | 0.59              | 8.60                  |
| O95633            | Follistatin-related protein 3;                          | -1.51                                        | -3.31                          | 0.64              | 20.90                 |
| Q86VR8            | Four-jointed box protein 1;                             | -1.32                                        | -0.46                          | 0.13              | 10.50                 |
| P04075            | Fructose-bisphosphate aldolase A;                       | -0.22                                        | -0.06                          | 0.74              | 42.00                 |
| P09972            | Fructose-bisphosphate aldolase C;                       | -0.28                                        | -0.11                          | 0.72              | 21.20                 |
| P22466            | Galanin peptides;                                       | 2.52                                         | 0.35                           | 0.00              | 12.20                 |
| P09382            | Galectin-1;                                             | -0.24                                        | -0.08                          | 0.74              | 45.20                 |
| Q08380            | Galectin-3-binding protein;                             | 0.96                                         | 0.20                           | 0.25              | 28.20                 |
| P17931            | Galectin-3;                                             | 0.21                                         | 0.02                           | 0.82              | 14.80                 |
| O75223            | Gamma-glutamylcyclotransferase;                         | 0.34                                         | 0.03                           | 0.69              | 11.20                 |
| P13284            | Gamma-interferon-inducible lysosomal thiol reductase;   | 0.97                                         | 0.04                           | 0.21              | 8.00                  |
| Q16666            | Gamma-interferon-inducible protein 16;                  | 0.81                                         | 0.32                           | 0.42              | 3.40                  |
| P17900            | Ganglioside GM2 activator;                              | -1.21                                        | -1.14                          | 0.43              | 17.60                 |
| Q13630            | GDP-L-fucose synthase;                                  | -0.65                                        | -0.05                          | 0.35              | 11.50                 |
| P06396            | Gelsolin;                                               | 0.32                                         | 0.07                           | 0.74              | 18.70                 |
| P35269            | General transcription factor IIF subunit 1;             | -0.56                                        | -0.12                          | 0.45              | 4.40                  |
| P13984            | General transcription factor IIF subunit 2;             | -0.51                                        | -0.06                          | 0.46              | 6.80                  |
| O60763            | General vesicular transport factor p115;                | 0.62                                         | 0.03                           | 0.44              | 0.90                  |
| P07093            | Glia-derived nexin;                                     | 1.00                                         | 0.53                           | 0.37              | 12.60                 |
| Q96EK6            | Glucosamine 6-phosphate N-acetyltransferase;            | -0.28                                        | -0.02                          | 0.66              | 9.80                  |
| P14314            | Glucosidase 2 subunit beta;                             | 0.87                                         | 0.40                           | 0.41              | 8.30                  |
| P00367            | Glutamate dehydrogenase 1, mitochondrial;               | 1.90                                         | 1.23                           | 0.12              | 14.20                 |
| P48507            | Glutamate--cysteine ligase regulatory subunit;          | -0.69                                        | -0.09                          | 0.33              | 5.80                  |
| Q06210            | Glutamine--fructose-6-phosphate aminotransferase [isome | -0.99                                        | -0.45                          | 0.31              | 4.40                  |
| P47897            | Glutamine--tRNA ligase;                                 | -0.39                                        | -0.36                          | 0.78              | 4.40                  |
| O76003            | Glutaredoxin-3;                                         | 0.55                                         | 0.39                           | 0.70              | 17.90                 |
| Q86SX6            | Glutaredoxin-related protein 5, mitochondrial;          | 0.76                                         | 0.14                           | 0.36              | 15.90                 |
| P78417            | Glutathione S-transferase omega-1;                      | 0.45                                         | 0.06                           | 0.60              | 24.50                 |



Table S2

| Uniprot accession | Name                                                        | Fold-change (log <sub>2</sub> ) of ASAPratio | Fold-change standard deviation | ASPARatio p-value | Sequence coverage (%) |
|-------------------|-------------------------------------------------------------|----------------------------------------------|--------------------------------|-------------------|-----------------------|
| P09211            | Glutathione S-transferase P;                                | -0.21                                        | -0.10                          | 0.81              | 45.70                 |
| P48637            | Glutathione synthetase;                                     | -1.60                                        | -3.00                          | 0.57              | 3.60                  |
| P04406            | Glyceraldehyde-3-phosphate dehydrogenase;                   | -0.45                                        | -0.09                          | 0.54              | 30.70                 |
| P41250            | Glycine--tRNA ligase;                                       | -1.14                                        | -0.40                          | 0.20              | 3.80                  |
| P11216            | Glycogen phosphorylase, brain form;                         | -1.39                                        | -1.10                          | 0.31              | 14.20                 |
| P06737            | Glycogen phosphorylase, liver form;                         | 0.43                                         | 0.19                           | 0.69              | 14.30                 |
| P49915            | GMP synthase [glutamine-hydrolyzing];                       | -0.14                                        | -0.04                          | 0.83              | 6.60                  |
| Q8NBJ4            | Golgi membrane protein 1;                                   | -0.84                                        | -0.17                          | 0.26              | 23.70                 |
| P28799            | Granulins;                                                  | -2.80                                        | -2.33                          | 0.04              | 11.30                 |
| Q8NCC3            | Group XV phospholipase A2;                                  | -0.32                                        | -0.07                          | 0.67              | 9.20                  |
| P09341            | Growth-regulated alpha protein;                             | 3.82                                         | 0.44                           | 0.00              | 27.10                 |
| Q99988            | Growth/differentiation factor 15;                           | -0.41                                        | -0.11                          | 0.58              | 8.80                  |
| P62826            | GTP-binding nuclear protein Ran;                            | -0.35                                        | -0.04                          | 0.60              | 30.60                 |
| Q9Y2T3            | Guanine deaminase;                                          | -0.33                                        | -0.11                          | 0.68              | 24.70                 |
| P62873            | Guanine nucleotide-binding protein G(I)/G(S)/G(T) subunit   | 1.55                                         | 0.20                           | 0.05              | 9.70                  |
| P62879            | Guanine nucleotide-binding protein G(I)/G(S)/G(T) subunit   | 1.70                                         | 0.72                           | 0.09              | 10.00                 |
| P63244            | Guanine nucleotide-binding protein subunit beta-2-like 1;   | -0.22                                        | -0.15                          | 0.83              | 17.70                 |
| Q9NX24            | H/ACA ribonucleoprotein complex subunit 2;                  | 2.19                                         | 0.28                           | 0.00              | 12.40                 |
| O60832            | H/ACA ribonucleoprotein complex subunit 4;                  | 1.49                                         | 1.24                           | 0.31              | 9.90                  |
| P08107            | Heat shock 70 kDa protein 1A/1B;                            | 0.18                                         | 0.03                           | 0.86              | 25.90                 |
| P34932            | Heat shock 70 kDa protein 4;                                | -0.60                                        | -0.33                          | 0.56              | 17.30                 |
| P11142            | Heat shock cognate 71 kDa protein;                          | -0.47                                        | -0.27                          | 0.65              | 41.30                 |
| Q92598            | Heat shock protein 105 kDa;                                 | -0.32                                        | -0.10                          | 0.69              | 17.50                 |
| P07900            | Heat shock protein HSP 90-alpha;                            | -0.21                                        | -0.04                          | 0.76              | 34.70                 |
| P08238            | Heat shock protein HSP 90-beta;                             | -0.05                                        | -0.01                          | 0.90              | 21.80                 |
| P54652            | Heat shock-related 70 kDa protein 2;                        | 2.64                                         | 0.19                           | 0.00              | 14.40                 |
| P69905            | Hemoglobin subunit alpha;                                   | 0.56                                         | 0.08                           | 0.50              | 28.20                 |
| P02042            | Hemoglobin subunit delta;                                   | -1.01                                        | -0.57                          | 0.34              | 12.90                 |
| Q7Z4V5            | Hepatoma-derived growth factor-related protein 2;           | 0.10                                         | 0.04                           | 0.95              | 6.30                  |
| P51858            | Hepatoma-derived growth factor;                             | -0.41                                        | -0.33                          | 0.74              | 25.80                 |
| Q5SSJ5            | Heterochromatin protein 1-binding protein 3;                | 2.56                                         | 0.08                           | 0.00              | 2.70                  |
| Q99729            | Heterogeneous nuclear ribonucleoprotein A/B;                | 0.55                                         | 0.13                           | 0.54              | 12.30                 |
| Q13151            | Heterogeneous nuclear ribonucleoprotein A0;                 | -2.35                                        | -0.24                          | 0.00              | 6.60                  |
| P09651            | Heterogeneous nuclear ribonucleoprotein A1;                 | 1.25                                         | 0.81                           | 0.32              | 14.00                 |
| P51991            | Heterogeneous nuclear ribonucleoprotein A3;                 | 1.63                                         | 0.22                           | 0.04              | 14.00                 |
| O14979            | Heterogeneous nuclear ribonucleoprotein D-like;             | 0.51                                         | 0.11                           | 0.56              | 7.60                  |
| Q14103            | Heterogeneous nuclear ribonucleoprotein D0;                 | 0.60                                         | 0.17                           | 0.51              | 11.80                 |
| P52597            | Heterogeneous nuclear ribonucleoprotein F;                  | -0.47                                        | -0.21                          | 0.60              | 28.40                 |
| P31943            | Heterogeneous nuclear ribonucleoprotein H;                  | 0.65                                         | 0.27                           | 0.53              | 25.40                 |
| P31942            | Heterogeneous nuclear ribonucleoprotein H3;                 | 1.38                                         | 0.53                           | 0.15              | 17.90                 |
| P61978            | Heterogeneous nuclear ribonucleoprotein K;                  | 0.82                                         | 0.32                           | 0.41              | 29.60                 |
| P52272            | Heterogeneous nuclear ribonucleoprotein M;                  | 1.56                                         | 0.55                           | 0.09              | 2.70                  |
| O60506            | Heterogeneous nuclear ribonucleoprotein Q;                  | 1.51                                         | 0.80                           | 0.17              | 27.40                 |
| O43390            | Heterogeneous nuclear ribonucleoprotein R;                  | 1.24                                         | 0.80                           | 0.32              | 16.70                 |
| Q1KMD3            | Heterogeneous nuclear ribonucleoprotein U-like protein 2;   | -1.96                                        | -0.15                          | 0.01              | 1.90                  |
| Q00839            | Heterogeneous nuclear ribonucleoprotein U;                  | 1.63                                         | 0.43                           | 0.06              | 6.10                  |
| P22626            | Heterogeneous nuclear ribonucleoproteins A2/B1;             | 1.96                                         | 1.27                           | 0.11              | 35.10                 |
| P07910            | Heterogeneous nuclear ribonucleoproteins C1/C2;             | 2.45                                         | 0.26                           | 0.00              | 19.00                 |
| P19367            | Hexokinase-1;                                               | 0.81                                         | 1.44                           | 0.78              | 7.10                  |
| P09429            | High mobility group protein B1;                             | 0.21                                         | 0.02                           | 0.82              | 17.70                 |
| P26583            | High mobility group protein B2;                             | 0.21                                         | 0.01                           | 0.82              | 18.20                 |
| O15347            | High mobility group protein B3;                             | -0.60                                        | -0.05                          | 0.39              | 6.50                  |
| P17096            | High mobility group protein HMG-I/HMG-Y;                    | 2.74                                         | 0.21                           | 0.00              | 22.40                 |
| Q9BX68            | Histidine triad nucleotide-binding protein 2, mitochondrial | 1.11                                         | 0.17                           | 0.16              | 9.20                  |
| P12081            | Histidine--tRNA ligase, cytoplasmic;                        | 0.26                                         | 0.05                           | 0.79              | 10.80                 |
| Q13547            | Histone deacetylase 1;                                      | -0.16                                        | -0.01                          | 0.78              | 5.00                  |
| P10412            | Histone H1.4;                                               | 0.58                                         | 0.15                           | 0.51              | 15.00                 |

Table S2

| Uniprot accession | Name                                                         | Fold-change (log <sub>2</sub> ) of ASAPratio | Fold-change standard deviation | ASPARatio p-value | Sequence coverage (%) |
|-------------------|--------------------------------------------------------------|----------------------------------------------|--------------------------------|-------------------|-----------------------|
| P16401            | Histone H1.5;                                                | 1.28                                         | 0.33                           | 0.14              | 10.20                 |
| Q92522            | Histone H1x;                                                 | 1.02                                         | 0.17                           | 0.21              | 7.00                  |
| P04908            | Histone H2A type 1-B/E;                                      | 0.37                                         | 0.05                           | 0.67              | 21.70                 |
| P0C0S5            | Histone H2A.Z;                                               | 2.25                                         | 1.00                           | 0.02              | 25.80                 |
| O60814            | Histone H2B type 1-K;                                        | -0.19                                        | -0.02                          | 0.76              | 14.30                 |
| P68431            | Histone H3.1;                                                | -0.47                                        | -0.23                          | 0.62              | 5.20                  |
| P62805            | Histone H4;                                                  | -0.96                                        | -0.41                          | 0.31              | 49.50                 |
| P01892            | HLA class I histocompatibility antigen, A-2 alpha chain;     | 0.57                                         | 0.04                           | 0.48              | 23.00                 |
| P13747            | HLA class I histocompatibility antigen, alpha chain E;       | -0.39                                        | -0.17                          | 0.66              | 10.30                 |
| P10321            | HLA class I histocompatibility antigen, Cw-7 alpha chain;    | 1.14                                         | 0.66                           | 0.33              | 23.00                 |
| P51610            | Host cell factor 1;                                          | 0.59                                         | 0.21                           | 0.54              | 1.00                  |
| P50502            | Hsc70-interacting protein;                                   | -0.24                                        | -0.10                          | 0.76              | 15.70                 |
| Q16543            | Hsp90 co-chaperone Cdc37;                                    | -0.19                                        | -0.04                          | 0.77              | 10.30                 |
| Q96S86            | Hyaluronan and proteoglycan link protein 3;                  | -0.99                                        | -0.80                          | 0.47              | 8.60                  |
| Q01581            | Hydroxymethylglutaryl-CoA synthase, cytoplasmic;             | 2.84                                         | 0.20                           | 0.00              | 2.50                  |
| Q9Y4L1            | Hypoxia up-regulated protein 1;                              | -1.39                                        | -1.83                          | 0.49              | 3.70                  |
| Q969P0            | Immunoglobulin superfamily member 8;                         | -1.69                                        | -0.16                          | 0.02              | 2.60                  |
| Q13308            | Inactive tyrosine-protein kinase 7;                          | -0.99                                        | -0.51                          | 0.33              | 6.40                  |
| P12268            | Inosine-5'-monophosphate dehydrogenase 2;                    | 0.25                                         | 0.07                           | 0.82              | 16.00                 |
| P14735            | Insulin-degrading enzyme;                                    | -1.39                                        | -0.55                          | 0.13              | 2.80                  |
| Q9Y6M1            | Insulin-like growth factor 2 mRNA-binding protein 2;         | 4.88                                         | 1.68                           | 0.00              | 4.50                  |
| P01344            | Insulin-like growth factor II;                               | -0.28                                        | -0.06                          | 0.68              | 18.30                 |
| P08833            | Insulin-like growth factor-binding protein 1;                | -0.77                                        | -0.47                          | 0.49              | 25.90                 |
| P18065            | Insulin-like growth factor-binding protein 2;                | 0.81                                         | 0.16                           | 0.33              | 36.90                 |
| P17936            | Insulin-like growth factor-binding protein 3;                | 1.23                                         | 1.00                           | 0.40              | 11.00                 |
| P22692            | Insulin-like growth factor-binding protein 4;                | 1.09                                         | 0.55                           | 0.32              | 31.40                 |
| P24592            | Insulin-like growth factor-binding protein 6;                | 2.26                                         | 0.36                           | 0.00              | 23.30                 |
| P26006            | Integrin alpha-3;                                            | 0.98                                         | 1.19                           | 0.63              | 2.10                  |
| P23229            | Integrin alpha-6;                                            | 1.59                                         | 1.00                           | 0.19              | 3.10                  |
| P05556            | Integrin beta-1;                                             | -1.04                                        | -0.99                          | 0.49              | 4.60                  |
| O95965            | Integrin beta-like protein 1;                                | -0.90                                        | -1.34                          | 0.68              | 18.20                 |
| P05362            | Intercellular adhesion molecule 1;                           | -0.72                                        | -0.12                          | 0.31              | 2.60                  |
| P32456            | Interferon-induced guanylate-binding protein 2;              | -1.39                                        | -0.33                          | 0.08              | 4.90                  |
| P19525            | Interferon-induced, double-stranded RNA-activated protein 1; | 0.80                                         | 0.23                           | 0.37              | 3.30                  |
| Q12905            | Interleukin enhancer-binding factor 2;                       | 1.28                                         | 0.41                           | 0.16              | 11.50                 |
| Q9NPH3            | Interleukin-1 receptor accessory protein;                    | -0.12                                        | -0.01                          | 0.82              | 5.10                  |
| Q2TAA2            | Isoamyl acetate-hydrolyzing esterase 1 homolog;              | -0.35                                        | -0.05                          | 0.61              | 6.90                  |
| Q96CN7            | Isochorismatase domain-containing protein 1;                 | 0.75                                         | 0.12                           | 0.36              | 4.70                  |
| O75874            | Isocitrate dehydrogenase [NADP] cytoplasmic;                 | -0.35                                        | -0.09                          | 0.64              | 15.20                 |
| P41252            | Isoleucine--tRNA ligase, cytoplasmic;                        | 0.27                                         | 0.05                           | 0.77              | 4.00                  |
| Q6UW63            | KDEL motif-containing protein 1;                             | 1.94                                         | 0.29                           | 0.01              | 2.40                  |
| Q8NAB2            | Kelch repeat and BTB domain-containing protein 3;            | 1.09                                         | 0.04                           | 0.16              | 1.20                  |
| P13645            | Keratin, type I cytoskeletal 10;                             | 0.26                                         | 0.02                           | 0.78              | 4.80                  |
| Q04695            | Keratin, type I cytoskeletal 17;                             | -1.01                                        | -0.29                          | 0.21              | 14.60                 |
| P05783            | Keratin, type I cytoskeletal 18;                             | 0.82                                         | 0.18                           | 0.33              | 34.40                 |
| P08727            | Keratin, type I cytoskeletal 19;                             | 2.76                                         | 1.52                           | 0.01              | 16.00                 |
| P35527            | Keratin, type I cytoskeletal 9;                              | 1.27                                         | 0.83                           | 0.31              | 3.70                  |
| P04264            | Keratin, type II cytoskeletal 1;                             | -0.45                                        | -0.26                          | 0.67              | 14.40                 |
| P02538            | Keratin, type II cytoskeletal 6A;                            | -0.12                                        | -0.02                          | 0.83              | 3.70                  |
| Q14CN4            | Keratin, type II cytoskeletal 72;                            | 0.75                                         | 0.05                           | 0.34              | 2.30                  |
| P05787            | Keratin, type II cytoskeletal 8;                             | 0.93                                         | 0.30                           | 0.31              | 40.00                 |
| Q07666            | KH domain-containing, RNA-binding, signal transduction;      | 0.58                                         | 0.06                           | 0.47              | 3.20                  |
| Q86UP2            | Kinectin;                                                    | -0.16                                        | -0.06                          | 0.82              | 10.50                 |
| Q07866            | Kinesin light chain 1;                                       | 1.34                                         | 1.24                           | 0.41              | 4.00                  |
| P33176            | Kinesin-1 heavy chain;                                       | -1.43                                        | -1.77                          | 0.46              | 8.50                  |
| P00338            | L-lactate dehydrogenase A chain;                             | -0.65                                        | -0.19                          | 0.42              | 21.70                 |
| Q6PKG0            | La-related protein 1;                                        | 1.50                                         | 0.20                           | 0.05              | 1.10                  |

Table S2

| Uniprot accession | Name                                                        | Fold-change (log <sub>2</sub> ) of ASPAratio | Fold-change standard deviation | ASPAratio p-value | Sequence coverage (%) |
|-------------------|-------------------------------------------------------------|----------------------------------------------|--------------------------------|-------------------|-----------------------|
| Q71RC2            | La-related protein 4;                                       | 0.50                                         | 0.05                           | 0.54              | 1.40                  |
| Q04760            | Lactoylglutathione lyase;                                   | -0.62                                        | -0.33                          | 0.54              | 18.50                 |
| Q14739            | Lamin-B receptor;                                           | -1.43                                        | -0.08                          | 0.05              | 2.90                  |
| P20700            | Lamin-B1;                                                   | 0.89                                         | 0.59                           | 0.49              | 24.70                 |
| Q03252            | Lamin-B2;                                                   | 0.45                                         | 0.18                           | 0.67              | 9.50                  |
| P42167            | Lamina-associated polypeptide 2, isoforms beta/gamma;       | 0.70                                         | 0.22                           | 0.45              | 11.90                 |
| P07942            | Laminin subunit beta-1;                                     | -0.62                                        | -0.38                          | 0.56              | 12.00                 |
| P55268            | Laminin subunit beta-2;                                     | 1.95                                         | 0.63                           | 0.03              | 5.50                  |
| P11047            | Laminin subunit gamma-1;                                    | -0.47                                        | -0.63                          | 0.81              | 18.50                 |
| Q13753            | Laminin subunit gamma-2;                                    | 0.65                                         | 0.29                           | 0.54              | 5.90                  |
| P46379            | Large proline-rich protein BAG6;                            | -0.45                                        | -0.08                          | 0.53              | 1.10                  |
| Q9NS15            | Latent-transforming growth factor beta-binding protein 3;   | 1.62                                         | 1.33                           | 0.27              | 4.80                  |
| Q8N2S1            | Latent-transforming growth factor beta-binding protein 4;   | -0.82                                        | -0.48                          | 0.45              | 2.00                  |
| Q99538            | Legumain;                                                   | 0.99                                         | 0.11                           | 0.21              | 13.40                 |
| Q9P2J5            | Leucine--tRNA ligase, cytoplasmic;                          | -0.96                                        | -0.73                          | 0.46              | 2.40                  |
| P42704            | Leucine-rich PPR motif-containing protein, mitochondrial;   | 1.51                                         | 2.21                           | 0.52              | 4.40                  |
| Q32MZ4            | Leucine-rich repeat flightless-interacting protein 1;       | -0.19                                        | -0.09                          | 0.83              | 11.90                 |
| Q8N1G4            | Leucine-rich repeat-containing protein 47;                  | -0.26                                        | -0.01                          | 0.68              | 7.40                  |
| Q96AG4            | Leucine-rich repeat-containing protein 59;                  | 0.56                                         | 0.21                           | 0.58              | 17.90                 |
| Q14847            | LIM and SH3 domain protein 1;                               | -0.53                                        | -0.12                          | 0.47              | 5.70                  |
| Q93052            | Lipoma-preferred partner;                                   | 1.49                                         | 0.19                           | 0.05              | 2.00                  |
| P24666            | Low molecular weight phosphotyrosine protein phosphatase;   | -1.51                                        | -0.13                          | 0.03              | 7.00                  |
| P01130            | Low-density lipoprotein receptor;                           | -0.22                                        | -0.11                          | 0.79              | 3.60                  |
| O95232            | Luc7-like protein 3;                                        | 0.42                                         | 0.02                           | 0.61              | 2.50                  |
| P05455            | Lupus La protein;                                           | 0.35                                         | 0.14                           | 0.74              | 19.60                 |
| Q15046            | Lysine--tRNA ligase;                                        | 0.28                                         | 0.06                           | 0.76              | 9.00                  |
| O60341            | Lysine-specific histone demethylase 1A;                     | 0.70                                         | 0.17                           | 0.43              | 3.10                  |
| P10253            | Lysosomal alpha-glucosidase;                                | -0.32                                        | -0.12                          | 0.70              | 8.90                  |
| O00754            | Lysosomal alpha-mannosidase;                                | 0.82                                         | 0.47                           | 0.49              | 3.50                  |
| P42785            | Lysosomal Pro-X carboxypeptidase;                           | 0.35                                         | 0.15                           | 0.75              | 13.50                 |
| P10619            | Lysosomal protective protein;                               | 0.35                                         | 0.09                           | 0.70              | 14.00                 |
| Q9UMR5            | Lysosomal thioesterase PPT2;                                | 0.66                                         | 0.06                           | 0.41              | 3.00                  |
| Q9Y4K0            | Lysyl oxidase homolog 2;                                    | -0.22                                        | -0.09                          | 0.78              | 9.90                  |
| Q96JB6            | Lysyl oxidase homolog 4;                                    | -0.77                                        | -0.18                          | 0.32              | 15.20                 |
| Q96C86            | m7GpppX diphosphatase;                                      | -1.24                                        | -1.09                          | 0.39              | 10.70                 |
| P09603            | Macrophage colony-stimulating factor 1;                     | 0.62                                         | 0.04                           | 0.44              | 5.20                  |
| P40121            | Macrophage-capping protein;                                 | 0.58                                         | 0.12                           | 0.50              | 16.10                 |
| Q14764            | Major vault protein;                                        | -1.43                                        | -1.66                          | 0.43              | 4.60                  |
| P40925            | Malate dehydrogenase, cytoplasmic;                          | -0.53                                        | -0.11                          | 0.46              | 25.70                 |
| Q9ULC4            | Malignant T-cell-amplified sequence 1;                      | -0.72                                        | -0.06                          | 0.30              | 10.50                 |
| P33908            | Mannosyl-oligosaccharide 1,2-alpha-mannosidase IA;          | -2.60                                        | -0.32                          | 0.00              | 2.10                  |
| P49006            | MARCKS-related protein;                                     | 0.99                                         | 0.07                           | 0.20              | 7.70                  |
| O00339            | Matrilin-2;                                                 | -0.62                                        | -0.10                          | 0.39              | 4.50                  |
| P43243            | Matrin-3;                                                   | 1.82                                         | 0.40                           | 0.03              | 12.90                 |
| Q99542            | Matrix metalloproteinase-19;                                | 1.07                                         | 0.13                           | 0.17              | 6.50                  |
| Q5JRA6            | Melanoma inhibitory activity protein 3;                     | 0.82                                         | 0.09                           | 0.30              | 0.60                  |
| O00562            | Membrane-associated phosphatidylinositol transfer protein;  | -4.01                                        | -9.71                          | 0.28              | 1.90                  |
| O00264            | Membrane-associated progesterone receptor component 1;      | 2.71                                         | 0.63                           | 0.00              | 20.00                 |
| Q13421            | Mesothelin;                                                 | 0.90                                         | 0.25                           | 0.30              | 32.20                 |
| P01033            | Metalloproteinase inhibitor 1;                              | 0.98                                         | 0.45                           | 0.35              | 42.00                 |
| P16035            | Metalloproteinase inhibitor 2;                              | -0.87                                        | -0.86                          | 0.57              | 21.40                 |
| Q13330            | Metastasis-associated protein MTA1;                         | 0.95                                         | 0.22                           | 0.26              | 1.70                  |
| O94776            | Metastasis-associated protein MTA2;                         | -1.04                                        | -0.80                          | 0.42              | 3.60                  |
| Q8N6R0            | Methyltransferase-like protein 13;                          | -3.80                                        | -0.53                          | 0.00              | 1.00                  |
| P55081            | Microfibrillar-associated protein 1;                        | 3.35                                         | 0.44                           | 0.00              | 3.00                  |
| Q13361            | Microfibrillar-associated protein 5;                        | -0.32                                        | -0.04                          | 0.64              | 6.90                  |
| Q9UPN3            | Microtubule-actin cross-linking factor 1, isoforms 1/2/3/5; | -1.01                                        | -0.08                          | 0.15              | 0.30                  |

Table S2

| Uniprot accession | Name                                                     | Fold-change (log <sub>2</sub> ) of ASPAratio | Fold-change standard deviation | ASPAratio p-value | Sequence coverage (%) |
|-------------------|----------------------------------------------------------|----------------------------------------------|--------------------------------|-------------------|-----------------------|
| P27816            | Microtubule-associated protein 4;                        | -1.08                                        | -0.45                          | 0.24              | 16.90                 |
| Q15691            | Microtubule-associated protein RP/EB family member 1;    | -0.84                                        | -0.68                          | 0.52              | 10.10                 |
| P10636            | Microtubule-associated protein tau;                      | -1.24                                        | -0.24                          | 0.10              | 2.00                  |
| P21741            | Midkine;                                                 | -0.49                                        | -0.12                          | 0.51              | 35.70                 |
| Q9Y3D6            | Mitochondrial fission 1 protein;                         | 2.10                                         | 0.31                           | 0.01              | 7.20                  |
| P62072            | Mitochondrial import inner membrane translocase subunit  | 1.71                                         | 0.36                           | 0.04              | 14.40                 |
| Q9Y5L4            | Mitochondrial import inner membrane translocase subunit  | -0.53                                        | -0.04                          | 0.43              | 14.70                 |
| Q3ZCQ8            | Mitochondrial import inner membrane translocase subunit  | 2.54                                         | 2.69                           | 0.15              | 9.60                  |
| Q9Y5J7            | Mitochondrial import inner membrane translocase subunit  | 1.43                                         | 0.36                           | 0.09              | 30.30                 |
| Q15388            | Mitochondrial import receptor subunit TOM20 homolog;     | 4.33                                         | 0.61                           | 0.00              | 9.00                  |
| O94826            | Mitochondrial import receptor subunit TOM70;             | 1.01                                         | 0.72                           | 0.45              | 3.10                  |
| Q16891            | Mitochondrial inner membrane protein;                    | 0.99                                         | 0.86                           | 0.53              | 9.90                  |
| O43684            | Mitotic checkpoint protein BUB3;                         | 0.25                                         | 0.02                           | 0.79              | 10.70                 |
| Q9BYG3            | MKI67 FHA domain-interacting nucleolar phosphoprotein    | 2.26                                         | 0.92                           | 0.02              | 10.60                 |
| P26038            | Moesin;                                                  | 2.70                                         | 3.06                           | 0.15              | 8.80                  |
| P53985            | Monocarboxylate transporter 1;                           | 2.22                                         | 0.67                           | 0.01              | 3.40                  |
| Q9UKD2            | mRNA turnover protein 4 homolog;                         | 1.17                                         | 0.16                           | 0.14              | 7.90                  |
| P22234            | Multifunctional protein ADE2;                            | 1.28                                         | 0.55                           | 0.20              | 16.90                 |
| Q7Z7M0            | Multiple epidermal growth factor-like domains protein 8; | 5.01                                         | 3.50                           | 0.00              | 0.40                  |
| Q9UNW1            | Multiple inositol polyphosphate phosphatase 1;           | 1.12                                         | 0.95                           | 0.46              | 13.80                 |
| Q9BQG0            | Myb-binding protein 1A;                                  | 2.89                                         | 0.82                           | 0.00              | 0.90                  |
| Q9NZM1            | Myoferlin;                                               | 0.75                                         | 0.12                           | 0.36              | 2.30                  |
| P60660            | Myosin light polypeptide 6;                              | -0.24                                        | -0.03                          | 0.70              | 28.50                 |
| Q6WCQ1            | Myosin phosphatase Rho-interacting protein;              | 0.69                                         | 0.08                           | 0.40              | 1.20                  |
| P35579            | Myosin-9;                                                | -0.65                                        | -0.22                          | 0.44              | 20.70                 |
| P58546            | Myotrophin;                                              | -0.69                                        | -0.09                          | 0.33              | 20.30                 |
| P29966            | Myristoylated alanine-rich C-kinase substrate;           | -9.97                                        | -0.01                          | 0.00              | 11.10                 |
| P34059            | N-acetylgalactosamine-6-sulfatase;                       | 0.32                                         | 0.11                           | 0.76              | 9.80                  |
| Q9UK23            | N-acetylglucosamine-1-phosphodiester alpha-N-acetylgluc  | -0.60                                        | -0.06                          | 0.40              | 1.90                  |
| P15586            | N-acetylglucosamine-6-sulfatase;                         | -0.37                                        | -0.13                          | 0.64              | 15.90                 |
| Q9H0A0            | N-acetyltransferase 10;                                  | 1.61                                         | 0.15                           | 0.04              | 1.10                  |
| P41227            | N-alpha-acetyltransferase 10;                            | -0.33                                        | -0.11                          | 0.67              | 16.60                 |
| Q14CX7            | N-alpha-acetyltransferase 25, NatB auxiliary subunit;    | -1.01                                        | -0.27                          | 0.20              | 2.70                  |
| Q9GZZ1            | N-alpha-acetyltransferase 50;                            | -0.14                                        | -0.02                          | 0.80              | 5.90                  |
| P20933            | N(4)-(beta-N-acetylglucosaminyl)-L-asparaginase;         | 1.75                                         | 0.14                           | 0.02              | 2.30                  |
| O94760            | N(G),N(G)-dimethylarginine dimethylaminohydrolase 1;     | -0.28                                        | -0.02                          | 0.66              | 12.60                 |
| O95865            | N(G),N(G)-dimethylarginine dimethylaminohydrolase 2;     | -1.74                                        | -4.37                          | 0.64              | 14.00                 |
| O14745            | Na(+)/H(+) exchange regulatory cofactor NHE-RF1;         | -0.35                                        | -0.08                          | 0.62              | 25.10                 |
| P15559            | NAD(P)H dehydrogenase [quinone] 1;                       | 0.38                                         | 0.06                           | 0.66              | 8.40                  |
| Q8NCW5            | NAD(P)H-hydrate epimerase;                               | 0.52                                         | 0.55                           | 0.78              | 10.40                 |
| O43678            | NADH dehydrogenase [ubiquinone] 1 alpha subcomplex s     | 4.26                                         | 0.69                           | 0.00              | 21.20                 |
| O95169            | NADH dehydrogenase [ubiquinone] 1 beta subcomplex su     | 3.11                                         | 0.13                           | 0.00              | 4.80                  |
| P19404            | NADH dehydrogenase [ubiquinone] flavoprotein 2, mitocl   | 4.73                                         | 1.61                           | 0.00              | 9.20                  |
| O75306            | NADH dehydrogenase [ubiquinone] iron-sulfur protein 2,   | 1.75                                         | 0.40                           | 0.03              | 4.50                  |
| O43920            | NADH dehydrogenase [ubiquinone] iron-sulfur protein 5;   | 3.77                                         | 0.29                           | 0.00              | 12.30                 |
| P28331            | NADH-ubiquinone oxidoreductase 75 kDa subunit, mitocl    | 3.14                                         | 2.44                           | 0.02              | 14.20                 |
| O43847            | Nardilysin;                                              | 0.62                                         | 0.13                           | 0.47              | 2.40                  |
| Q13765            | Nascent polypeptide-associated complex subunit alpha;    | -0.72                                        | -0.25                          | 0.39              | 25.60                 |
| Q13564            | NEDD8-activating enzyme E1 regulatory subunit;           | -1.14                                        | -0.55                          | 0.26              | 4.90                  |
| Q92859            | Neogenin;                                                | -1.28                                        | -1.06                          | 0.35              | 2.80                  |
| Q9UMX5            | Neudesin;                                                | 0.26                                         | 0.08                           | 0.80              | 12.20                 |
| P32004            | Neural cell adhesion molecule L1;                        | 2.15                                         | 0.84                           | 0.02              | 10.70                 |
| Q9BYT8            | Neurolysin, mitochondrial;                               | 1.08                                         | 0.14                           | 0.17              | 1.70                  |
| P42857            | Neuron-specific protein family member 1;                 | 0.46                                         | 0.04                           | 0.58              | 5.90                  |
| O14786            | Neuropilin-1;                                            | -3.01                                        | -3.64                          | 0.12              | 5.40                  |
| O60462            | Neuropilin-2;                                            | 0.46                                         | 0.05                           | 0.58              | 1.30                  |
| O15240            | Neurosecretory protein VGF;                              | -1.04                                        | -0.17                          | 0.16              | 8.90                  |

Table S2

| Uniprot accession | Name                                                             | Fold-change (log <sub>2</sub> ) of ASAPratio | Fold-change standard deviation | ASPARatio p-value | Sequence coverage (%) |
|-------------------|------------------------------------------------------------------|----------------------------------------------|--------------------------------|-------------------|-----------------------|
| Q14697            | Neutral alpha-glucosidase AB;                                    | 0.69                                         | 0.21                           | 0.46              | 2.50                  |
| O15226            | NF-kappa-B-repressing factor;                                    | 1.42                                         | 0.09                           | 0.06              | 1.60                  |
| P55769            | NHP2-like protein 1;                                             | 1.38                                         | 0.55                           | 0.16              | 18.80                 |
| P43490            | Nicotinamide phosphoribosyltransferase;                          | -0.53                                        | -0.17                          | 0.51              | 27.70                 |
| Q9Y314            | Nitric oxide synthase-interacting protein;                       | -0.62                                        | -0.24                          | 0.47              | 13.00                 |
| P69849            | Nodal modulator 3;                                               | 0.38                                         | 0.02                           | 0.65              | 3.30                  |
| P05114            | Non-histone chromosomal protein HMG-14;                          | -0.96                                        | -0.07                          | 0.18              | 11.00                 |
| Q9UNZ2            | NSFL1 cofactor p47;                                              | -0.60                                        | -0.42                          | 0.61              | 22.70                 |
| P49321            | Nuclear autoantigenic sperm protein;                             | -1.18                                        | -1.19                          | 0.47              | 6.60                  |
| Q14980            | Nuclear mitotic apparatus protein 1;                             | 0.26                                         | 0.12                           | 0.84              | 4.80                  |
| P57740            | Nuclear pore complex protein Nup107;                             | 1.48                                         | 0.23                           | 0.06              | 1.50                  |
| Q8N1F7            | Nuclear pore complex protein Nup93;                              | -1.14                                        | -1.88                          | 0.65              | 3.30                  |
| P37198            | Nuclear pore glycoprotein p62;                                   | 3.41                                         | 0.24                           | 0.00              | 2.70                  |
| Q8TAT6            | Nuclear protein localization protein 4 homolog;                  | -1.14                                        | -0.75                          | 0.34              | 3.50                  |
| Q9H1E3            | Nuclear ubiquitous casein and cyclin-dependent kinase subunit 1; | 1.74                                         | 0.29                           | 0.03              | 7.80                  |
| P67809            | Nuclease-sensitive element-binding protein 1;                    | 0.74                                         | 0.27                           | 0.45              | 27.50                 |
| P80303            | Nucleobindin-2;                                                  | 0.94                                         | 0.11                           | 0.23              | 3.80                  |
| Q14978            | Nucleolar and coiled-body phosphoprotein 1;                      | 2.10                                         | 0.39                           | 0.01              | 2.60                  |
| Q8WTT2            | Nucleolar complex protein 3 homolog;                             | 2.25                                         | 0.18                           | 0.00              | 1.40                  |
| O00567            | Nucleolar protein 56;                                            | 2.47                                         | 1.75                           | 0.06              | 4.90                  |
| Q9Y2X3            | Nucleolar protein 58;                                            | 1.34                                         | 0.19                           | 0.09              | 2.80                  |
| Q9NR30            | Nucleolar RNA helicase 2;                                        | 1.73                                         | 2.36                           | 0.44              | 16.20                 |
| P17480            | Nucleolar transcription factor 1;                                | 2.08                                         | 0.42                           | 0.01              | 2.10                  |
| P19338            | Nucleolin;                                                       | 0.94                                         | 0.34                           | 0.32              | 19.00                 |
| P06748            | Nucleophosmin;                                                   | 0.87                                         | 0.05                           | 0.26              | 4.40                  |
| P12270            | Nucleoprotein TPR;                                               | 1.53                                         | 0.58                           | 0.11              | 3.50                  |
| P55209            | Nucleosome assembly protein 1-like 1;                            | 0.40                                         | 0.03                           | 0.63              | 12.50                 |
| Q99733            | Nucleosome assembly protein 1-like 4;                            | -0.24                                        | -0.02                          | 0.70              | 10.10                 |
| Q12830            | Nucleosome-remodeling factor subunit BPTF;                       | 3.31                                         | 7.26                           | 0.33              | 0.80                  |
| Q9NTK5            | Obg-like ATPase 1;                                               | -1.47                                        | -1.79                          | 0.44              | 16.40                 |
| Q5VST9            | Obscurin;                                                        | -2.35                                        | -1.56                          | 0.05              | 0.30                  |
| Q9NRN5            | Olfactomedin-like protein 3;                                     | -1.14                                        | -1.36                          | 0.54              | 8.60                  |
| P04181            | Ornithine aminotransferase, mitochondrial;                       | 3.23                                         | 0.27                           | 0.00              | 3.20                  |
| Q92882            | Osteoclast-stimulating factor 1;                                 | -1.96                                        | -0.61                          | 0.02              | 8.90                  |
| P50897            | Palmitoyl-protein thioesterase 1;                                | -0.33                                        | -0.37                          | 0.84              | 15.00                 |
| Q9BRP8            | Partner of Y14 and mago;                                         | -1.04                                        | -0.17                          | 0.16              | 7.40                  |
| O75475            | PC4 and SFRS1-interacting protein;                               | 0.82                                         | 0.32                           | 0.41              | 12.10                 |
| Q96JY6            | PDZ and LIM domain protein 2;                                    | -0.26                                        | -0.05                          | 0.69              | 2.80                  |
| Q96HC4            | PDZ and LIM domain protein 5;                                    | 0.45                                         | 0.16                           | 0.66              | 10.10                 |
| Q9NR12            | PDZ and LIM domain protein 7;                                    | -0.32                                        | -0.11                          | 0.70              | 4.80                  |
| P26022            | Pentraxin-related protein PTX3;                                  | 3.47                                         | 1.66                           | 0.00              | 12.10                 |
| P19021            | Peptidyl-glycine alpha-amidating monooxygenase;                  | -0.12                                        | -0.03                          | 0.84              | 9.70                  |
| Q9NYL4            | Peptidyl-prolyl cis-trans isomerase FKBP11;                      | 7.63                                         | 1.09                           | 0.00              | 5.00                  |
| P62942            | Peptidyl-prolyl cis-trans isomerase FKBP1A;                      | -0.16                                        | -0.02                          | 0.78              | 13.00                 |
| Q00688            | Peptidyl-prolyl cis-trans isomerase FKBP3;                       | 1.11                                         | 0.20                           | 0.17              | 27.70                 |
| Q02790            | Peptidyl-prolyl cis-trans isomerase FKBP4;                       | -0.65                                        | -0.27                          | 0.48              | 10.00                 |
| O43447            | Peptidyl-prolyl cis-trans isomerase H;                           | 0.27                                         | 0.01                           | 0.76              | 14.70                 |
| Q9Y3C6            | Peptidyl-prolyl cis-trans isomerase-like 1;                      | 0.78                                         | 0.12                           | 0.33              | 8.40                  |
| Q9Y3E5            | Peptidyl-tRNA hydrolase 2, mitochondrial;                        | 2.73                                         | 0.31                           | 0.00              | 8.40                  |
| Q99541            | Perilipin-2;                                                     | 1.42                                         | 0.11                           | 0.06              | 2.50                  |
| O60664            | Perilipin-3;                                                     | 0.82                                         | 1.37                           | 0.77              | 7.10                  |
| Q06830            | Peroxiredoxin-1;                                                 | -0.26                                        | -0.03                          | 0.68              | 45.70                 |
| P32119            | Peroxiredoxin-2;                                                 | -0.51                                        | -0.37                          | 0.67              | 31.80                 |
| P30044            | Peroxiredoxin-5, mitochondrial;                                  | 0.34                                         | 0.06                           | 0.70              | 17.30                 |
| P30041            | Peroxiredoxin-6;                                                 | 1.07                                         | 0.35                           | 0.24              | 23.20                 |
| Q8WW12            | PEST proteolytic signal-containing nuclear protein;              | -1.01                                        | -0.45                          | 0.29              | 24.70                 |
| Q8WWQ0            | PH-interacting protein;                                          | 2.06                                         | 0.37                           | 0.01              | 1.00                  |

Table S2

| Uniprot accession | Name                                                         | Fold-change (log <sub>2</sub> ) of ASPAratio | Fold-change standard deviation | ASPAratio p-value | Sequence coverage (%) |
|-------------------|--------------------------------------------------------------|----------------------------------------------|--------------------------------|-------------------|-----------------------|
| Q9Y285            | Phenylalanine--tRNA ligase alpha subunit;                    | 1.38                                         | 0.15                           | 0.07              | 2.60                  |
| Q9NSD9            | Phenylalanine--tRNA ligase beta subunit;                     | 0.26                                         | 0.04                           | 0.78              | 4.80                  |
| P30086            | Phosphatidylethanolamine-binding protein 1;                  | -0.51                                        | -0.10                          | 0.48              | 50.80                 |
| P48739            | Phosphatidylinositol transfer protein beta isoform;          | 0.38                                         | 0.02                           | 0.65              | 4.40                  |
| P00558            | Phosphoglycerate kinase 1;                                   | -0.37                                        | -0.09                          | 0.61              | 46.00                 |
| P18669            | Phosphoglycerate mutase 1;                                   | 0.26                                         | 0.06                           | 0.79              | 39.80                 |
| A6NDG6            | Phosphoglycolate phosphatase;                                | -0.47                                        | -0.05                          | 0.50              | 7.80                  |
| Q9Y263            | Phospholipase A-2-activating protein;                        | -4.61                                        | -1.12                          | 0.00              | 2.10                  |
| Q6P4A8            | Phospholipase B-like 1;                                      | 0.75                                         | 0.05                           | 0.34              | 7.40                  |
| O15067            | Phosphoribosylformylglycinamide synthase;                    | 0.33                                         | 0.14                           | 0.77              | 4.30                  |
| Q9Y617            | Phosphoserine aminotransferase;                              | 0.84                                         | 0.80                           | 0.62              | 39.70                 |
| P36955            | Pigment epithelium-derived factor;                           | 3.25                                         | 2.33                           | 0.01              | 12.90                 |
| Q96BK5            | PIN2/TERF1-interacting telomerase inhibitor 1;               | 2.82                                         | 0.27                           | 0.00              | 2.70                  |
| Q9H307            | Pinin;                                                       | 1.85                                         | 1.23                           | 0.14              | 3.50                  |
| Q9BTY2            | Plasma alpha-L-fucosidase;                                   | 0.99                                         | 0.15                           | 0.21              | 4.30                  |
| P23634            | Plasma membrane calcium-transporting ATPase 4;               | -0.72                                        | -1.16                          | 0.76              | 3.50                  |
| P05155            | Plasma protease C1 inhibitor;                                | -1.08                                        | -0.43                          | 0.23              | 9.40                  |
| Q8NC51            | Plasminogen activator inhibitor 1 RNA-binding protein;       | -0.28                                        | -0.07                          | 0.69              | 15.20                 |
| P13797            | Plastin-3;                                                   | -1.51                                        | -0.30                          | 0.05              | 7.80                  |
| P68402            | Platelet-activating factor acetylhydrolase IB subunit beta;  | -1.39                                        | -0.22                          | 0.06              | 8.30                  |
| Q15102            | Platelet-activating factor acetylhydrolase IB subunit gamma; | -0.77                                        | -0.35                          | 0.42              | 11.30                 |
| Q9NRA1            | Platelet-derived growth factor C;                            | -1.04                                        | -0.24                          | 0.17              | 5.20                  |
| Q8WV24            | Pleckstrin homology-like domain family A member 1;           | 0.38                                         | 0.08                           | 0.67              | 2.20                  |
| Q15149            | Plectin;                                                     | -0.45                                        | -0.25                          | 0.66              | 19.60                 |
| O43660            | Pleiotropic regulator 1;                                     | 0.80                                         | 0.08                           | 0.31              | 2.50                  |
| O15031            | Plexin-B2;                                                   | -0.77                                        | -0.42                          | 0.46              | 1.30                  |
| Q92692            | Poliovirus receptor-related protein 2;                       | 0.40                                         | 0.07                           | 0.65              | 3.30                  |
| P11940            | Polyadenylate-binding protein 1;                             | 1.16                                         | 0.35                           | 0.20              | 17.00                 |
| Q13310            | Polyadenylate-binding protein 4;                             | -0.62                                        | -0.48                          | 0.63              | 12.40                 |
| Q6NZI2            | Polymerase I and transcript release factor;                  | -0.65                                        | -0.29                          | 0.49              | 19.00                 |
| Q10471            | Polypeptide N-acetylgalactosaminyltransferase 2;             | -0.35                                        | -0.14                          | 0.68              | 16.60                 |
| P26599            | Polypyrimidine tract-binding protein 1;                      | 0.88                                         | 0.09                           | 0.26              | 9.00                  |
| P0CG47            | Polyubiquitin-B;                                             | -0.32                                        | -0.04                          | 0.64              | 56.30                 |
| Q9Y3B4            | Pre-mRNA branch site protein p14;                            | 0.96                                         | 0.23                           | 0.26              | 20.80                 |
| Q9UMS4            | Pre-mRNA-processing factor 19;                               | 0.82                                         | 0.15                           | 0.32              | 7.50                  |
| Q9NW64            | Pre-mRNA-splicing factor RBM22;                              | 2.00                                         | 0.15                           | 0.01              | 2.40                  |
| O60925            | Prefoldin subunit 1;                                         | -2.60                                        | -0.16                          | 0.00              | 8.20                  |
| Q9UHV9            | Prefoldin subunit 2;                                         | -0.65                                        | -0.20                          | 0.43              | 16.90                 |
| Q99471            | Prefoldin subunit 5;                                         | -0.41                                        | -0.22                          | 0.67              | 24.70                 |
| O15212            | Prefoldin subunit 6;                                         | -0.90                                        | -0.07                          | 0.20              | 9.30                  |
| P02545            | Prelamin-A/C;                                                | 0.32                                         | 0.07                           | 0.74              | 39.20                 |
| Q96IZ0            | PRKC apoptosis WT1 regulator protein;                        | -2.35                                        | -1.92                          | 0.10              | 8.50                  |
| Q92841            | Probable ATP-dependent RNA helicase DDX17;                   | -0.14                                        | -0.01                          | 0.80              | 10.50                 |
| Q9BUQ8            | Probable ATP-dependent RNA helicase DDX23;                   | -0.24                                        | -0.03                          | 0.70              | 2.80                  |
| P17844            | Probable ATP-dependent RNA helicase DDX5;                    | 0.65                                         | 0.29                           | 0.54              | 11.10                 |
| Q9HD20            | Probable cation-transporting ATPase 13A1;                    | 5.99                                         | 1.13                           | 0.00              | 1.80                  |
| Q9UKZ9            | Procollagen C-endopeptidase enhancer 2;                      | -1.24                                        | -0.15                          | 0.09              | 6.00                  |
| Q02809            | Procollagen-lysine,2-oxoglutarate 5-dioxygenase 1;           | 0.52                                         | 0.18                           | 0.59              | 22.00                 |
| O60568            | Procollagen-lysine,2-oxoglutarate 5-dioxygenase 3;           | 0.35                                         | 0.08                           | 0.70              | 16.10                 |
| P07737            | Profilin-1;                                                  | -0.21                                        | -0.05                          | 0.76              | 62.10                 |
| Q8WUM4            | Programmed cell death 6-interacting protein;                 | -0.84                                        | -1.38                          | 0.73              | 12.20                 |
| O75340            | Programmed cell death protein 6;                             | 1.23                                         | 0.49                           | 0.21              | 14.70                 |
| P12004            | Proliferating cell nuclear antigen;                          | -0.47                                        | -0.16                          | 0.56              | 33.00                 |
| Q9UQ80            | Proliferation-associated protein 2G4;                        | -0.47                                        | -0.14                          | 0.55              | 28.20                 |
| Q8IZL8            | Proline-, glutamic acid- and leucine-rich protein 1;         | 1.23                                         | 0.94                           | 0.38              | 4.00                  |
| Q32P28            | Prolyl 3-hydroxylase 1;                                      | 0.40                                         | 0.09                           | 0.66              | 1.40                  |
| Q8NBP7            | Proprotein convertase subtilisin/kexin type 9;               | -0.53                                        | -0.10                          | 0.46              | 25.60                 |

Table S2

| Uniprot accession | Name                                                        | Fold-change (log <sub>2</sub> ) of ASPAratio | Fold-change standard deviation | ASPAratio p-value | Sequence coverage (%) |
|-------------------|-------------------------------------------------------------|----------------------------------------------|--------------------------------|-------------------|-----------------------|
| Q9P2B2            | Prostaglandin F2 receptor negative regulator;               | -0.37                                        | -0.02                          | 0.57              | 1.10                  |
| P41222            | Prostaglandin-H2 D-isomerase;                               | 3.73                                         | 0.29                           | 0.00              | 17.40                 |
| Q06323            | Proteasome activator complex subunit 1;                     | 0.56                                         | 0.25                           | 0.60              | 25.70                 |
| P61289            | Proteasome activator complex subunit 3;                     | -1.56                                        | -1.05                          | 0.20              | 6.70                  |
| Q9BT73            | Proteasome assembly chaperone 3;                            | -0.22                                        | -0.02                          | 0.72              | 12.30                 |
| P25786            | Proteasome subunit alpha type-1;                            | -0.56                                        | -0.52                          | 0.70              | 17.10                 |
| P25787            | Proteasome subunit alpha type-2;                            | -0.19                                        | -0.04                          | 0.78              | 27.80                 |
| P25789            | Proteasome subunit alpha type-4;                            | -0.51                                        | -0.11                          | 0.49              | 10.00                 |
| P28066            | Proteasome subunit alpha type-5;                            | 0.28                                         | 0.09                           | 0.78              | 15.40                 |
| P28072            | Proteasome subunit beta type-6;                             | -0.37                                        | -0.03                          | 0.57              | 12.60                 |
| P28062            | Proteasome subunit beta type-8;                             | -0.77                                        | -0.04                          | 0.28              | 4.30                  |
| Q8IVF2            | Protein AHNAK2;                                             | 0.81                                         | 1.01                           | 0.70              | 3.60                  |
| Q99873            | Protein arginine N-methyltransferase 1;                     | -1.24                                        | -0.47                          | 0.17              | 6.90                  |
| Q8WUW1            | Protein BRICK1;                                             | -1.04                                        | -0.07                          | 0.14              | 12.00                 |
| Q9Y2B0            | Protein canopy homolog 2;                                   | 0.25                                         | 0.03                           | 0.79              | 8.80                  |
| O60888            | Protein CutA;                                               | -0.26                                        | -0.02                          | 0.68              | 7.80                  |
| O00622            | Protein CYR61;                                              | -0.82                                        | -0.13                          | 0.26              | 9.40                  |
| P35659            | Protein DEK;                                                | 1.05                                         | 0.96                           | 0.51              | 10.10                 |
| P30101            | Protein disulfide-isomerase A3;                             | 0.30                                         | 0.12                           | 0.78              | 28.30                 |
| P13667            | Protein disulfide-isomerase A4;                             | -0.22                                        | -0.08                          | 0.77              | 15.80                 |
| Q15084            | Protein disulfide-isomerase A6;                             | 0.48                                         | 0.07                           | 0.57              | 16.80                 |
| Q99497            | Protein DJ-1;                                               | -0.19                                        | -0.05                          | 0.78              | 41.80                 |
| Q8N8S7            | Protein enabled homolog;                                    | 0.87                                         | 0.11                           | 0.28              | 2.00                  |
| Q92520            | Protein FAM3C;                                              | -1.01                                        | -0.25                          | 0.19              | 33.90                 |
| Q9NUQ9            | Protein FAM49B;                                             | -1.60                                        | -0.24                          | 0.03              | 4.00                  |
| Q9UNF0            | Protein kinase C and casein kinase substrate in neurons pr  | -0.77                                        | -0.43                          | 0.47              | 6.80                  |
| Q96EK9            | Protein KTI12 homolog;                                      | -4.01                                        | -0.65                          | 0.00              | 3.70                  |
| Q9BRT6            | Protein LLP homolog;                                        | 2.02                                         | 0.15                           | 0.01              | 10.90                 |
| Q9BXY0            | Protein MAK16 homolog;                                      | 2.35                                         | 0.44                           | 0.00              | 5.30                  |
| Q9BZQ8            | Protein Niban;                                              | 0.53                                         | 0.06                           | 0.51              | 2.30                  |
| O14974            | Protein phosphatase 1 regulatory subunit 12A;               | -0.45                                        | -0.09                          | 0.54              | 2.00                  |
| Q9Y520            | Protein PRRC2C;                                             | -0.22                                        | -0.12                          | 0.81              | 1.00                  |
| Q96PU8            | Protein quaking;                                            | 3.63                                         | 0.45                           | 0.00              | 5.00                  |
| Q13123            | Protein Red;                                                | 0.49                                         | 0.04                           | 0.55              | 2.00                  |
| P60903            | Protein S100-A10;                                           | 2.52                                         | 1.74                           | 0.05              | 17.50                 |
| Q96FQ6            | Protein S100-A16;                                           | 0.37                                         | 0.04                           | 0.67              | 34.00                 |
| P26447            | Protein S100-A4;                                            | -0.41                                        | -0.13                          | 0.59              | 35.60                 |
| P25815            | Protein S100-P;                                             | -2.60                                        | -0.32                          | 0.00              | 13.70                 |
| P53992            | Protein transport protein Sec24C;                           | 0.48                                         | 0.35                           | 0.74              | 2.70                  |
| O94979            | Protein transport protein Sec31A;                           | 1.93                                         | 0.13                           | 0.01              | 1.60                  |
| P22061            | Protein-L-isoaspartate(D-aspartate) O-methyltransferase;    | 0.30                                         | 0.03                           | 0.73              | 12.30                 |
| P06454            | Prothymosin alpha;                                          | -0.16                                        | -0.01                          | 0.78              | 9.00                  |
| P61457            | Pterin-4-alpha-carbinolamine dehydratase;                   | -1.21                                        | -0.70                          | 0.26              | 17.30                 |
| P55786            | Puromycin-sensitive aminopeptidase;                         | -0.62                                        | -0.26                          | 0.49              | 11.60                 |
| Q5T1J5            | Putative coiled-coil-helix-coiled-coil-helix domain-contair | -0.33                                        | -0.22                          | 0.76              | 27.20                 |
| Q6P1N9            | Putative deoxyribonuclease TATDN1;                          | 0.65                                         | 0.04                           | 0.41              | 3.70                  |
| Q49A26            | Putative oxidoreductase GLYR1;                              | 2.55                                         | 1.56                           | 0.03              | 5.10                  |
| Q6GMV3            | Putative peptidyl-tRNA hydrolase PTRHD1;                    | -0.87                                        | -0.19                          | 0.25              | 8.60                  |
| O43143            | Putative pre-mRNA-splicing factor ATP-dependent RNA h       | 0.60                                         | 0.18                           | 0.51              | 5.70                  |
| O60231            | Putative pre-mRNA-splicing factor ATP-dependent RNA h       | 1.18                                         | 0.20                           | 0.15              | 1.20                  |
| Q9NQ29            | Putative RNA-binding protein Luc7-like 1;                   | 0.23                                         | 0.05                           | 0.82              | 6.70                  |
| A6NL28            | Putative tropomyosin alpha-3 chain-like protein;            | -0.49                                        | -0.05                          | 0.48              | 10.30                 |
| O00764            | Pyridoxal kinase;                                           | -1.04                                        | -0.09                          | 0.14              | 3.20                  |
| P14618            | Pyruvate kinase isozymes M1/M2;                             | -0.60                                        | -0.32                          | 0.56              | 44.30                 |
| Q08257            | Quinone oxidoreductase;                                     | -0.14                                        | -0.02                          | 0.81              | 5.20                  |
| P50395            | Rab GDP dissociation inhibitor beta;                        | -1.32                                        | -1.44                          | 0.45              | 26.50                 |
| Q9UHA4            | Ragulator complex protein LAMTOR3;                          | 1.71                                         | 0.15                           | 0.02              | 8.10                  |

Table S2

| Uniprot accession | Name                                                   | Fold-change (log <sub>2</sub> ) of ASPAratio | Fold-change standard deviation | ASPAratio p-value | Sequence coverage (%) |
|-------------------|--------------------------------------------------------|----------------------------------------------|--------------------------------|-------------------|-----------------------|
| O43504            | Ragulator complex protein LAMTOR5;                     | 0.41                                         | 0.05                           | 0.63              | 22.00                 |
| Q9HD47            | Ran guanine nucleotide release factor;                 | -0.87                                        | -0.11                          | 0.22              | 7.00                  |
| Q9H6Z4            | Ran-binding protein 3;                                 | 2.13                                         | 0.27                           | 0.01              | 2.10                  |
| P43487            | Ran-specific GTPase-activating protein;                | -0.19                                        | -0.01                          | 0.76              | 10.90                 |
| P46940            | Ras GTPase-activating-like protein IQGAP1;             | -0.47                                        | -0.35                          | 0.70              | 7.40                  |
| P61106            | Ras-related protein Rab-14;                            | 0.65                                         | 0.06                           | 0.42              | 11.60                 |
| P62820            | Ras-related protein Rab-1A;                            | 0.86                                         | 0.24                           | 0.33              | 18.90                 |
| P61019            | Ras-related protein Rab-2A;                            | -0.28                                        | -0.03                          | 0.66              | 5.70                  |
| P51148            | Ras-related protein Rab-5C;                            | 1.42                                         | 0.63                           | 0.16              | 11.60                 |
| P61224            | Ras-related protein Rap-1b;                            | -3.43                                        | -0.37                          | 0.00              | 6.00                  |
| P10586            | Receptor-type tyrosine-protein phosphatase F;          | 0.23                                         | 0.08                           | 0.84              | 11.70                 |
| P23470            | Receptor-type tyrosine-protein phosphatase gamma;      | -0.69                                        | -0.21                          | 0.39              | 2.70                  |
| Q15262            | Receptor-type tyrosine-protein phosphatase kappa;      | 0.33                                         | 0.05                           | 0.71              | 1.60                  |
| Q9NQG5            | Regulation of nuclear pre-mRNA domain-containing prote | -0.24                                        | -0.04                          | 0.71              | 9.50                  |
| P18754            | Regulator of chromosome condensation;                  | 0.30                                         | 0.08                           | 0.76              | 8.10                  |
| Q9BZR6            | Reticulon-4 receptor;                                  | 0.32                                         | 0.02                           | 0.71              | 2.50                  |
| Q9NQC3            | Reticulon-4;                                           | 1.09                                         | 0.04                           | 0.16              | 1.10                  |
| O75116            | Rho-associated protein kinase 2;                       | -0.33                                        | -0.08                          | 0.64              | 2.40                  |
| P08134            | Rho-related GTP-binding protein RhoC;                  | 2.35                                         | 2.00                           | 0.11              | 16.10                 |
| P13489            | Ribonuclease inhibitor;                                | -1.08                                        | -1.23                          | 0.54              | 10.00                 |
| O00584            | Ribonuclease T2;                                       | 0.80                                         | 0.18                           | 0.35              | 30.50                 |
| Q99575            | Ribonucleases P/MRP protein subunit POP1;              | 0.37                                         | 0.08                           | 0.69              | 1.70                  |
| P11908            | Ribose-phosphate pyrophosphokinase 2;                  | -0.56                                        | -0.06                          | 0.42              | 5.30                  |
| O76021            | Ribosomal L1 domain-containing protein 1;              | 1.70                                         | 1.06                           | 0.16              | 9.40                  |
| Q14684            | Ribosomal RNA processing protein 1 homolog B;          | -0.62                                        | -0.35                          | 0.55              | 5.30                  |
| Q9GZL7            | Ribosome biogenesis protein WDR12;                     | 2.22                                         | 0.73                           | 0.01              | 6.40                  |
| Q9H7B2            | Ribosome production factor 2 homolog;                  | 0.58                                         | 0.49                           | 0.71              | 7.50                  |
| Q9P2E9            | Ribosome-binding protein 1;                            | -0.67                                        | -0.87                          | 0.73              | 6.00                  |
| P38159            | RNA-binding motif protein, X chromosome;               | 2.54                                         | 0.98                           | 0.01              | 15.10                 |
| Q9NTZ6            | RNA-binding protein 12;                                | 1.37                                         | 0.15                           | 0.08              | 1.90                  |
| P49756            | RNA-binding protein 25;                                | 0.66                                         | 0.06                           | 0.41              | 1.20                  |
| Q9NW13            | RNA-binding protein 28;                                | 3.90                                         | 0.96                           | 0.00              | 3.20                  |
| Q14498            | RNA-binding protein 39;                                | 1.01                                         | 0.11                           | 0.20              | 4.90                  |
| Q9Y5S9            | RNA-binding protein 8A;                                | 1.70                                         | 0.16                           | 0.03              | 10.90                 |
| Q01844            | RNA-binding protein EWS;                               | 0.21                                         | 0.01                           | 0.82              | 2.10                  |
| P35637            | RNA-binding protein FUS;                               | 0.63                                         | 0.19                           | 0.50              | 8.20                  |
| Q9UKM9            | RNA-binding protein Raly;                              | 1.88                                         | 0.25                           | 0.02              | 9.80                  |
| Q9Y6N7            | Roundabout homolog 1;                                  | -1.43                                        | -3.66                          | 0.70              | 1.10                  |
| Q9Y230            | RuvB-like 2;                                           | -1.18                                        | -1.14                          | 0.46              | 6.90                  |
| P31153            | S-adenosylmethionine synthase isoform type-2;          | -0.53                                        | -0.10                          | 0.46              | 15.70                 |
| P10768            | S-formylglutathione hydrolase;                         | 0.88                                         | 0.34                           | 0.36              | 8.50                  |
| Q13126            | S-methyl-5'-thioadenosine phosphorylase;               | -1.56                                        | -0.69                          | 0.11              | 16.30                 |
| P82979            | SAP domain-containing ribonucleoprotein;               | -0.35                                        | -0.05                          | 0.60              | 9.00                  |
| Q8WVN6            | Secreted and transmembrane protein 1;                  | 0.26                                         | 0.07                           | 0.80              | 7.70                  |
| P49903            | Selenide, water dikinase 1;                            | 0.42                                         | 0.03                           | 0.61              | 3.80                  |
| Q14563            | Semaphorin-3A;                                         | 1.49                                         | 0.52                           | 0.11              | 10.20                 |
| Q99985            | Semaphorin-3C;                                         | -0.28                                        | -0.06                          | 0.68              | 17.70                 |
| Q9H3T2            | Semaphorin-6C;                                         | -2.90                                        | -1.08                          | 0.00              | 1.20                  |
| O75326            | Semaphorin-7A;                                         | -1.96                                        | -1.06                          | 0.07              | 3.60                  |
| Q9NVA2            | Septin-11;                                             | 0.45                                         | 0.15                           | 0.65              | 15.40                 |
| Q15019            | Septin-2;                                              | 0.70                                         | 0.36                           | 0.53              | 12.70                 |
| Q9UHD8            | Septin-9;                                              | -0.24                                        | -0.03                          | 0.70              | 11.90                 |
| O95084            | Serine protease 23;                                    | -1.32                                        | -0.49                          | 0.14              | 27.90                 |
| Q92743            | Serine protease HTRA1;                                 | -0.67                                        | -0.06                          | 0.34              | 10.40                 |
| P49591            | Serine--tRNA ligase, cytoplasmic;                      | -0.39                                        | -0.19                          | 0.67              | 5.30                  |
| Q9Y3F4            | Serine-threonine kinase receptor-associated protein;   | -0.60                                        | -0.54                          | 0.67              | 28.00                 |
| Q07955            | Serine/arginine-rich splicing factor 1;                | 0.50                                         | 0.17                           | 0.61              | 35.90                 |



Table S2

| Uniprot accession | Name                                                       | Fold-change (log <sub>2</sub> ) of ASPAratio | Fold-change standard deviation | ASPAratio p-value | Sequence coverage (%) |
|-------------------|------------------------------------------------------------|----------------------------------------------|--------------------------------|-------------------|-----------------------|
| Q05519            | Serine/arginine-rich splicing factor 11;                   | 0.95                                         | 0.11                           | 0.23              | 5.20                  |
| P84103            | Serine/arginine-rich splicing factor 3;                    | 0.98                                         | 0.19                           | 0.24              | 10.40                 |
| Q13243            | Serine/arginine-rich splicing factor 5;                    | 1.07                                         | 0.11                           | 0.17              | 4.40                  |
| Q13247            | Serine/arginine-rich splicing factor 6;                    | -0.53                                        | -0.73                          | 0.79              | 6.10                  |
| Q16629            | Serine/arginine-rich splicing factor 7;                    | 0.40                                         | 0.06                           | 0.64              | 3.80                  |
| Q13242            | Serine/arginine-rich splicing factor 9;                    | 1.35                                         | 0.53                           | 0.16              | 17.60                 |
| Q16513            | Serine/threonine-protein kinase N2;                        | -0.60                                        | -0.05                          | 0.39              | 0.90                  |
| O95747            | Serine/threonine-protein kinase OSR1;                      | -0.32                                        | -0.10                          | 0.68              | 8.20                  |
| Q13177            | Serine/threonine-protein kinase PAK 2;                     | 0.89                                         | 1.52                           | 0.75              | 9.50                  |
| P62714            | Serine/threonine-protein phosphatase 2A catalytic subunit  | -1.43                                        | -1.04                          | 0.26              | 6.10                  |
| P62136            | Serine/threonine-protein phosphatase PP1-alpha catalytic s | -0.32                                        | -0.09                          | 0.68              | 9.40                  |
| P50453            | Serpins B9;                                                | 1.30                                         | 0.12                           | 0.09              | 3.20                  |
| Q9H299            | SH3 domain-binding glutamic acid-rich-like protein 3;      | -0.28                                        | -0.02                          | 0.66              | 16.10                 |
| O75368            | SH3 domain-binding glutamic acid-rich-like protein;        | -1.85                                        | -0.13                          | 0.01              | 8.80                  |
| P29353            | SHC-transforming protein 1;                                | 0.40                                         | 0.10                           | 0.67              | 2.10                  |
| Q9HAT2            | Sialate O-acetyltransferase;                               | 0.43                                         | 0.08                           | 0.62              | 11.70                 |
| Q9NR45            | Sialic acid synthase;                                      | -1.56                                        | -0.18                          | 0.03              | 3.60                  |
| Q99519            | Sialidase-1;                                               | -0.69                                        | -0.06                          | 0.32              | 11.10                 |
| Q9UHB9            | Signal recognition particle 68 kDa protein;                | 3.31                                         | 0.43                           | 0.00              | 1.60                  |
| P49458            | Signal recognition particle 9 kDa protein;                 | 1.28                                         | 0.08                           | 0.09              | 12.80                 |
| P08240            | Signal recognition particle receptor subunit alpha;        | 6.44                                         | 1.51                           | 0.00              | 2.70                  |
| Q9Y5M8            | Signal recognition particle receptor subunit beta;         | 2.81                                         | 2.91                           | 0.10              | 14.80                 |
| Q29RF7            | Sister chromatid cohesion protein PDS5 homolog A;          | -0.96                                        | -0.20                          | 0.21              | 1.00                  |
| O75093            | Slit homolog 1 protein;                                    | -0.77                                        | -0.48                          | 0.50              | 0.60                  |
| O43765            | Small glutamine-rich tetratricopeptide repeat-containing p | -0.26                                        | -0.02                          | 0.68              | 4.20                  |
| P62304            | Small nuclear ribonucleoprotein E;                         | 0.96                                         | 0.08                           | 0.22              | 13.00                 |
| P62306            | Small nuclear ribonucleoprotein F;                         | 4.56                                         | 0.92                           | 0.00              | 9.30                  |
| A8MWD9            | Small nuclear ribonucleoprotein G-like protein;            | 0.90                                         | 0.03                           | 0.24              | 15.80                 |
| P62314            | Small nuclear ribonucleoprotein Sm D1;                     | 1.42                                         | 0.19                           | 0.07              | 9.20                  |
| P62316            | Small nuclear ribonucleoprotein Sm D2;                     | 1.21                                         | 0.27                           | 0.14              | 31.40                 |
| P62318            | Small nuclear ribonucleoprotein Sm D3;                     | 1.50                                         | 0.55                           | 0.11              | 23.80                 |
| P14678            | Small nuclear ribonucleoprotein-associated proteins B and  | 0.88                                         | 0.03                           | 0.26              | 12.50                 |
| P63165            | Small ubiquitin-related modifier 1;                        | 0.35                                         | 0.01                           | 0.67              | 15.80                 |
| P55854            | Small ubiquitin-related modifier 3;                        | 0.58                                         | 0.05                           | 0.47              | 12.60                 |
| Q13573            | SNW domain-containing protein 1;                           | 1.56                                         | 0.45                           | 0.07              | 2.60                  |
| P05023            | Sodium/potassium-transporting ATPase subunit alpha-1;      | 0.48                                         | 0.24                           | 0.68              | 4.20                  |
| O15244            | Solute carrier family 22 member 2;                         | -0.77                                        | -0.04                          | 0.28              | 3.10                  |
| Q00796            | Sorbitol dehydrogenase;                                    | -0.77                                        | -0.04                          | 0.28              | 2.50                  |
| Q99523            | Sortilin;                                                  | -0.53                                        | -0.62                          | 0.76              | 4.60                  |
| Q96L92            | Sorting nexin-27;                                          | 0.28                                         | 0.03                           | 0.75              | 2.80                  |
| Q9Y5X3            | Sorting nexin-5;                                           | -0.72                                        | -0.04                          | 0.29              | 4.70                  |
| P09486            | SPARC;                                                     | -0.56                                        | -0.19                          | 0.50              | 35.30                 |
| Q9NUQ6            | SPATS2-like protein;                                       | 2.69                                         | 2.96                           | 0.14              | 6.10                  |
| P19623            | Spermidine synthase;                                       | -0.60                                        | -0.21                          | 0.48              | 12.90                 |
| P52788            | Spermine synthase;                                         | -1.24                                        | -0.68                          | 0.24              | 5.20                  |
| Q13838            | Spliceosome RNA helicase DDX39B;                           | 0.34                                         | 0.10                           | 0.73              | 17.30                 |
| Q15637            | Splicing factor 1;                                         | -0.24                                        | -0.16                          | 0.81              | 8.10                  |
| Q15459            | Splicing factor 3A subunit 1;                              | 0.43                                         | 0.17                           | 0.68              | 7.60                  |
| Q15428            | Splicing factor 3A subunit 2;                              | 2.54                                         | 0.27                           | 0.00              | 3.90                  |
| Q12874            | Splicing factor 3A subunit 3;                              | 2.24                                         | 4.69                           | 0.49              | 4.20                  |
| O75533            | Splicing factor 3B subunit 1;                              | 0.68                                         | 0.52                           | 0.65              | 5.20                  |
| Q15393            | Splicing factor 3B subunit 3;                              | 0.82                                         | 0.37                           | 0.44              | 11.10                 |
| Q15427            | Splicing factor 3B subunit 4;                              | 1.05                                         | 0.11                           | 0.18              | 3.30                  |
| P23246            | Splicing factor, proline- and glutamine-rich;              | 0.43                                         | 0.07                           | 0.61              | 11.00                 |
| P37268            | Squalene synthase;                                         | 3.80                                         | 0.93                           | 0.00              | 3.10                  |
| Q14247            | Src substrate cortactin;                                   | -1.47                                        | -1.22                          | 0.30              | 10.90                 |
| P52823            | Stanniocalcin-1;                                           | 0.78                                         | 0.08                           | 0.33              | 5.70                  |

Table S2

| Uniprot accession | Name                                                     | Fold-change (log <sub>2</sub> ) of ASPAratio | Fold-change standard deviation | ASPAratio p-value | Sequence coverage (%) |
|-------------------|----------------------------------------------------------|----------------------------------------------|--------------------------------|-------------------|-----------------------|
| Q7KZF4            | Staphylococcal nuclease domain-containing protein 1;     | -0.49                                        | -0.10                          | 0.50              | 9.20                  |
| Q9NZ72            | Stathmin-3;                                              | -0.77                                        | -0.08                          | 0.28              | 9.40                  |
| P38646            | Stress-70 protein, mitochondrial;                        | 1.17                                         | 0.45                           | 0.23              | 14.70                 |
| Q14683            | Structural maintenance of chromosomes protein 1A;        | 0.68                                         | 0.07                           | 0.40              | 0.80                  |
| Q9UQE7            | Structural maintenance of chromosomes protein 3;         | 1.02                                         | 0.07                           | 0.19              | 1.70                  |
| Q8NBJ7            | Sulfatase-modifying factor 2;                            | 0.56                                         | 0.43                           | 0.71              | 26.90                 |
| Q6ZRP7            | Sulfhydryl oxidase 2;                                    | -0.90                                        | -0.77                          | 0.52              | 13.20                 |
| P63279            | SUMO-conjugating enzyme UBC9;                            | -0.32                                        | -0.11                          | 0.69              | 19.60                 |
| P42285            | Superkiller viralicidic activity 2-like 2;               | -0.22                                        | -0.16                          | 0.83              | 4.50                  |
| P00441            | Superoxide dismutase [Cu-Zn];                            | -0.21                                        | -0.05                          | 0.76              | 23.40                 |
| P04179            | Superoxide dismutase [Mn], mitochondrial;                | 0.62                                         | 0.06                           | 0.44              | 6.30                  |
| P78539            | Sushi repeat-containing protein SRPX;                    | -1.47                                        | -0.29                          | 0.06              | 2.80                  |
| O60687            | Sushi repeat-containing protein SRPX2;                   | -0.60                                        | -0.24                          | 0.50              | 9.20                  |
| Q92922            | SWI/SNF complex subunit SMARCC1;                         | 1.27                                         | 0.33                           | 0.14              | 2.10                  |
| O60264            | SWI/SNF-related matrix-associated actin-dependent regul; | 2.09                                         | 0.28                           | 0.01              | 1.10                  |
| Q99536            | Synaptic vesicle membrane protein VAT-1 homolog;         | 1.67                                         | 3.67                           | 0.63              | 9.40                  |
| P57105            | Synaptojanin-2-binding protein;                          | 4.11                                         | 1.01                           | 0.00              | 8.30                  |
| P18827            | Syndecan-1;                                              | -1.79                                        | -0.25                          | 0.02              | 5.50                  |
| P31431            | Syndecan-4;                                              | 1.26                                         | 0.13                           | 0.10              | 7.10                  |
| O00560            | Syntenin-1;                                              | -0.56                                        | -0.15                          | 0.46              | 7.00                  |
| P17987            | T-complex protein 1 subunit alpha;                       | -0.28                                        | -0.11                          | 0.72              | 22.10                 |
| P78371            | T-complex protein 1 subunit beta;                        | -0.77                                        | -0.42                          | 0.46              | 25.80                 |
| P50991            | T-complex protein 1 subunit delta;                       | -0.24                                        | -0.09                          | 0.76              | 26.30                 |
| Q99832            | T-complex protein 1 subunit eta;                         | -0.37                                        | -0.09                          | 0.61              | 10.10                 |
| P49368            | T-complex protein 1 subunit gamma;                       | -0.22                                        | -0.09                          | 0.78              | 17.60                 |
| P50990            | T-complex protein 1 subunit theta;                       | -0.87                                        | -0.43                          | 0.37              | 34.90                 |
| P40227            | T-complex protein 1 subunit zeta;                        | -1.18                                        | -0.42                          | 0.19              | 20.70                 |
| Q9Y490            | Talin-1;                                                 | -0.16                                        | -0.07                          | 0.83              | 5.20                  |
| Q7Z7G0            | Target of Nesh-SH3;                                      | 3.10                                         | 2.21                           | 0.02              | 6.10                  |
| Q92804            | TATA-binding protein-associated factor 2N;               | 0.96                                         | 0.04                           | 0.21              | 5.20                  |
| O14907            | Tax1-binding protein 3;                                  | -0.84                                        | -0.09                          | 0.23              | 13.70                 |
| Q08629            | Testican-1;                                              | 1.60                                         | 0.75                           | 0.13              | 15.50                 |
| P05452            | Tetranectin;                                             | -1.51                                        | -0.17                          | 0.04              | 5.90                  |
| O43657            | Tetraspanin-6;                                           | -0.87                                        | -0.14                          | 0.23              | 4.50                  |
| P52888            | Thimet oligopeptidase;                                   | -0.79                                        | -0.56                          | 0.52              | 7.70                  |
| Q9P2K2            | Thioredoxin domain-containing protein 16;                | -1.74                                        | -0.35                          | 0.02              | 3.00                  |
| Q9BRA2            | Thioredoxin domain-containing protein 17;                | -0.22                                        | -0.09                          | 0.77              | 15.40                 |
| Q8NBS9            | Thioredoxin domain-containing protein 5;                 | -0.56                                        | -0.64                          | 0.75              | 15.30                 |
| Q16881            | Thioredoxin reductase 1, cytoplasmic;                    | 0.90                                         | 0.14                           | 0.26              | 4.80                  |
| P30048            | Thioredoxin-dependent peroxide reductase, mitochondrial; | 1.89                                         | 0.26                           | 0.02              | 17.60                 |
| Q86V81            | THO complex subunit 4;                                   | 0.51                                         | 0.11                           | 0.56              | 11.30                 |
| P07996            | Thrombospondin-1;                                        | -1.56                                        | -0.37                          | 0.05              | 17.50                 |
| P49746            | Thrombospondin-3;                                        | 1.58                                         | 1.13                           | 0.24              | 6.50                  |
| Q9Y2W1            | Thyroid hormone receptor-associated protein 3;           | -0.33                                        | -0.16                          | 0.72              | 3.00                  |
| Q15654            | Thyroid receptor-interacting protein 6;                  | -0.62                                        | -0.08                          | 0.38              | 3.80                  |
| Q9UKU6            | Thyrotropin-releasing hormone-degrading ectoenzyme;      | -0.56                                        | -0.25                          | 0.54              | 3.20                  |
| Q9UDY2            | Tight junction protein ZO-2;                             | -1.79                                        | -0.87                          | 0.07              | 5.60                  |
| O75663            | TIP41-like protein;                                      | 0.53                                         | 0.12                           | 0.54              | 12.10                 |
| P04066            | Tissue alpha-L-fucosidase;                               | -0.82                                        | -0.32                          | 0.36              | 6.20                  |
| P10646            | Tissue factor pathway inhibitor;                         | 1.95                                         | 0.42                           | 0.02              | 7.60                  |
| P00750            | Tissue-type plasminogen activator;                       | 2.89                                         | 1.24                           | 0.00              | 20.10                 |
| Q8WZ42            | Titin;                                                   | -2.28                                        | -7.74                          | 0.65              | 0.10                  |
| O14657            | Torsin-1B;                                               | -0.47                                        | -0.14                          | 0.55              | 9.50                  |
| O43493            | Trans-Golgi network integral membrane protein 2;         | -0.82                                        | -0.17                          | 0.28              | 2.90                  |
| Q96EM0            | Trans-L-3-hydroxyproline dehydratase;                    | -0.35                                        | -0.05                          | 0.60              | 8.80                  |
| P23193            | Transcription elongation factor A protein 1;             | 0.35                                         | 0.03                           | 0.67              | 7.30                  |
| Q5H9L2            | Transcription elongation factor A protein-like 5;        | -0.45                                        | -0.02                          | 0.51              | 4.50                  |

Table S2

| Uniprot accession | Name                                                   | Fold-change (log <sub>2</sub> ) of ASAPratio | Fold-change standard deviation | ASPARatio p-value | Sequence coverage (%) |
|-------------------|--------------------------------------------------------|----------------------------------------------|--------------------------------|-------------------|-----------------------|
| Q15370            | Transcription elongation factor B polypeptide 2;       | -0.26                                        | -0.01                          | 0.68              | 7.60                  |
| O00267            | Transcription elongation factor SPT5;                  | -0.56                                        | -0.11                          | 0.44              | 2.90                  |
| Q7KZ85            | Transcription elongation factor SPT6;                  | 0.63                                         | 0.07                           | 0.44              | 0.70                  |
| O14776            | Transcription elongation regulator 1;                  | 0.72                                         | 0.03                           | 0.35              | 1.10                  |
| Q00059            | Transcription factor A, mitochondrial;                 | 1.97                                         | 1.14                           | 0.09              | 8.50                  |
| P20290            | Transcription factor BTF3;                             | 0.48                                         | 0.06                           | 0.57              | 12.60                 |
| P35713            | Transcription factor SOX-18;                           | 0.69                                         | 0.07                           | 0.39              | 2.30                  |
| Q13263            | Transcription intermediary factor 1-beta;              | -0.45                                        | -0.32                          | 0.70              | 5.90                  |
| Q8WX19            | Transcriptional repressor p66-beta;                    | -0.87                                        | -0.10                          | 0.22              | 2.40                  |
| Q12788            | Transducin beta-like protein 3;                        | 2.90                                         | 0.89                           | 0.00              | 1.60                  |
| P02786            | Transferrin receptor protein 1;                        | 1.89                                         | 1.10                           | 0.10              | 11.20                 |
| Q03167            | Transforming growth factor beta receptor type 3;       | 0.58                                         | 0.12                           | 0.50              | 3.40                  |
| P01137            | Transforming growth factor beta-1;                     | 1.01                                         | 0.22                           | 0.23              | 15.90                 |
| Q15582            | Transforming growth factor-beta-induced protein ig-h3; | -2.08                                        | -2.19                          | 0.21              | 3.50                  |
| P55072            | Transitional endoplasmic reticulum ATPase;             | -0.39                                        | -0.13                          | 0.62              | 31.30                 |
| P29401            | Transketolase;                                         | -1.47                                        | -0.81                          | 0.17              | 25.40                 |
| Q9UI10            | Translation initiation factor eIF-2B subunit delta;    | -1.32                                        | -0.23                          | 0.08              | 2.70                  |
| Q99598            | Translin-associated protein X;                         | 0.25                                         | 0.04                           | 0.80              | 4.50                  |
| P49755            | Transmembrane emp24 domain-containing protein 10;      | 2.85                                         | 0.15                           | 0.00              | 4.10                  |
| Q9UHN6            | Transmembrane protein 2;                               | -0.79                                        | -0.08                          | 0.27              | 2.50                  |
| Q13428            | Treacle protein;                                       | 0.32                                         | 0.10                           | 0.76              | 1.40                  |
| P40939            | Trifunctional enzyme subunit alpha, mitochondrial;     | 4.93                                         | 0.86                           | 0.00              | 1.20                  |
| P55084            | Trifunctional enzyme subunit beta, mitochondrial;      | 2.08                                         | 5.42                           | 0.61              | 4.90                  |
| P22102            | Trifunctional purine biosynthetic protein adenosine-3; | 1.90                                         | 0.35                           | 0.02              | 2.70                  |
| P60174            | Triosephosphate isomerase;                             | -0.51                                        | -0.13                          | 0.50              | 50.00                 |
| Q08J23            | tRNA (cytosine(34)-C(5))-methyltransferase;            | -2.14                                        | -0.19                          | 0.00              | 2.50                  |
| Q9Y310            | tRNA-splicing ligase RtcB homolog;                     | -0.41                                        | -0.17                          | 0.63              | 12.30                 |
| P06753            | Tropomyosin alpha-3 chain;                             | -0.37                                        | -0.15                          | 0.66              | 14.80                 |
| P07951            | Tropomyosin beta chain;                                | 0.10                                         | 0.14                           | 0.98              | 10.90                 |
| P23381            | Tryptophan--tRNA ligase, cytoplasmic;                  | 0.40                                         | 0.32                           | 0.80              | 17.40                 |
| P68363            | Tubulin alpha-1B chain;                                | -0.22                                        | -0.05                          | 0.74              | 32.60                 |
| P68366            | Tubulin alpha-4A chain;                                | -2.43                                        | -0.26                          | 0.00              | 23.00                 |
| P07437            | Tubulin beta chain;                                    | -0.60                                        | -0.24                          | 0.50              | 28.80                 |
| P68371            | Tubulin beta-4B chain;                                 | -0.45                                        | -0.08                          | 0.53              | 31.50                 |
| Q14166            | Tubulin--tyrosine ligase-like protein 12;              | -0.53                                        | -0.05                          | 0.43              | 1.60                  |
| Q99426            | Tubulin-folding cofactor B;                            | -1.32                                        | -1.11                          | 0.35              | 7.80                  |
| O75347            | Tubulin-specific chaperone A;                          | -0.49                                        | -0.13                          | 0.51              | 49.10                 |
| Q9GZM7            | Tubulointerstitial nephritis antigen-like;             | 0.49                                         | 0.05                           | 0.55              | 2.80                  |
| O00300            | Tumor necrosis factor receptor superfamily member 11B; | -4.61                                        | -5.62                          | 0.02              | 9.00                  |
| Q9NP84            | Tumor necrosis factor receptor superfamily member 12A; | -1.69                                        | -0.06                          | 0.02              | 7.80                  |
| P19438            | Tumor necrosis factor receptor superfamily member 1A;  | -1.01                                        | -0.98                          | 0.51              | 6.40                  |
| O95407            | Tumor necrosis factor receptor superfamily member 6B;  | 1.11                                         | 0.20                           | 0.17              | 14.30                 |
| O43399            | Tumor protein D54;                                     | -1.43                                        | -2.16                          | 0.53              | 16.00                 |
| Q6IBS0            | Twinfilin-2;                                           | -0.28                                        | -0.04                          | 0.66              | 9.70                  |
| Q9UIG0            | Tyrosine-protein kinase BAZ1B;                         | 5.26                                         | 1.63                           | 0.00              | 1.10                  |
| P30530            | Tyrosine-protein kinase receptor UFO;                  | -1.90                                        | -0.99                          | 0.07              | 2.10                  |
| Q06124            | Tyrosine-protein phosphatase non-receptor type 11;     | 0.28                                         | 0.02                           | 0.74              | 2.80                  |
| P08621            | U1 small nuclear ribonucleoprotein 70 kDa;             | 0.33                                         | 0.05                           | 0.71              | 7.10                  |
| P09234            | U1 small nuclear ribonucleoprotein C;                  | -1.14                                        | -0.13                          | 0.12              | 7.50                  |
| O15042            | U2 snRNP-associated SURP motif-containing protein;     | 1.15                                         | 0.07                           | 0.13              | 1.20                  |
| O00566            | U3 small nucleolar ribonucleoprotein protein MPP10;    | 2.32                                         | 0.26                           | 0.00              | 1.90                  |
| O43818            | U3 small nucleolar RNA-interacting protein 2;          | 3.80                                         | 0.19                           | 0.00              | 2.30                  |
| O43290            | U4/U6.U5 tri-snRNP-associated protein 1;               | 0.74                                         | 0.16                           | 0.39              | 5.80                  |
| O75643            | U5 small nuclear ribonucleoprotein 200 kDa helicase;   | -0.24                                        | -0.13                          | 0.79              | 4.50                  |
| Q9Y333            | U6 snRNA-associated Sm-like protein LSm2;              | 0.88                                         | 0.28                           | 0.33              | 27.40                 |
| P45974            | Ubiquitin carboxyl-terminal hydrolase 5;               | -0.82                                        | -0.33                          | 0.37              | 3.50                  |
| Q93009            | Ubiquitin carboxyl-terminal hydrolase 7;               | 0.41                                         | 0.32                           | 0.79              | 3.00                  |

Table S2

| Uniprot accession | Name                                                      | Fold-change (log <sub>2</sub> ) of ASPA ratio | Fold-change standard deviation | ASPA ratio p-value | Sequence coverage (%) |
|-------------------|-----------------------------------------------------------|-----------------------------------------------|--------------------------------|--------------------|-----------------------|
| P15374            | Ubiquitin carboxyl-terminal hydrolase isozyme L3;         | -0.33                                         | -0.06                          | 0.63               | 8.70                  |
| Q9Y5K5            | Ubiquitin carboxyl-terminal hydrolase isozyme L5;         | 0.88                                          | 0.08                           | 0.26               | 6.70                  |
| O14562            | Ubiquitin domain-containing protein UBD1;                 | -0.19                                         | -0.02                          | 0.76               | 3.60                  |
| Q96FW1            | Ubiquitin thioesterase OTUB1;                             | -0.22                                         | -0.02                          | 0.72               | 7.40                  |
| P61086            | Ubiquitin-conjugating enzyme E2 K;                        | -0.79                                         | -0.30                          | 0.37               | 13.50                 |
| Q9C0C9            | Ubiquitin-conjugating enzyme E2 O;                        | 0.96                                          | 0.05                           | 0.21               | 0.90                  |
| Q13404            | Ubiquitin-conjugating enzyme E2 variant 1;                | -0.21                                         | -0.05                          | 0.77               | 32.00                 |
| P61960            | Ubiquitin-fold modifier 1;                                | -0.45                                         | -0.06                          | 0.52               | 17.60                 |
| Q9Y3C8            | Ubiquitin-fold modifier-conjugating enzyme 1;             | 6.70                                          | 0.89                           | 0.00               | 10.20                 |
| P22314            | Ubiquitin-like modifier-activating enzyme 1;              | -0.79                                         | -0.51                          | 0.49               | 12.60                 |
| Q05086            | Ubiquitin-protein ligase E3A;                             | 1.74                                          | 0.17                           | 0.02               | 1.00                  |
| Q14376            | UDP-glucose 4-epimerase;                                  | -0.69                                         | -0.09                          | 0.33               | 5.70                  |
| Q9NYU2            | UDP-glucose:glycoprotein glucosyltransferase 1;           | 0.41                                          | 0.35                           | 0.80               | 1.70                  |
| Q8NBZ7            | UDP-glucuronic acid decarboxylase 1;                      | 0.75                                          | 0.11                           | 0.36               | 4.00                  |
| Q16222            | UDP-N-acetylhexosamine pyrophosphorylase;                 | -0.62                                         | -0.14                          | 0.41               | 7.50                  |
| Q92614            | Unconventional myosin-XVIIIa;                             | -0.14                                         | -0.01                          | 0.80               | 0.50                  |
| Q9H741            | UPF0454 protein C12orf49;                                 | -0.82                                         | -0.10                          | 0.25               | 6.30                  |
| Q9BY42            | UPF0549 protein C20orf43;                                 | -3.15                                         | -1.39                          | 0.00               | 7.20                  |
| Q9Y224            | UPF0568 protein C14orf166;                                | -0.45                                         | -0.17                          | 0.60               | 17.20                 |
| P00749            | Urokinase-type plasminogen activator;                     | -0.35                                         | -0.16                          | 0.70               | 11.40                 |
| P06132            | Uroporphyrinogen decarboxylase;                           | -0.26                                         | -0.11                          | 0.75               | 4.60                  |
| P54727            | UV excision repair protein RAD23 homolog B;               | 0.25                                          | 0.05                           | 0.80               | 4.20                  |
| P38606            | V-type proton ATPase catalytic subunit A;                 | -1.43                                         | -3.16                          | 0.66               | 9.20                  |
| P21281            | V-type proton ATPase subunit B, brain isoform;            | 1.80                                          | 1.42                           | 0.21               | 7.20                  |
| Q9UBQ0            | Vacuolar protein sorting-associated protein 29;           | -0.39                                         | -0.06                          | 0.56               | 12.60                 |
| Q9NP79            | Vacuolar protein sorting-associated protein VTA1 homolog  | -0.49                                         | -0.07                          | 0.48               | 6.50                  |
| P26640            | Valine--tRNA ligase;                                      | -0.62                                         | -0.12                          | 0.40               | 4.40                  |
| P50552            | Vasodilator-stimulated phosphoprotein;                    | 0.21                                          | 0.02                           | 0.82               | 3.20                  |
| Q9P035            | Very-long-chain (3R)-3-hydroxyacyl-[acyl-carrier protein] | 2.35                                          | 0.21                           | 0.00               | 3.00                  |
| Q9NZ01            | Very-long-chain enoyl-CoA reductase;                      | 3.34                                          | 0.24                           | 0.00               | 6.20                  |
| P63027            | Vesicle-associated membrane protein 2;                    | 3.08                                          | 0.50                           | 0.00               | 17.00                 |
| P51809            | Vesicle-associated membrane protein 7;                    | -2.90                                         | -0.22                          | 0.00               | 4.10                  |
| P46459            | Vesicle-fusing ATPase;                                    | 3.86                                          | 0.64                           | 0.00               | 3.20                  |
| O75396            | Vesicle-trafficking protein SEC22b;                       | 0.94                                          | 0.10                           | 0.23               | 4.70                  |
| P18206            | Vinculin;                                                 | 0.77                                          | 0.38                           | 0.49               | 14.60                 |
| P07225            | Vitamin K-dependent protein S;                            | -1.51                                         | -1.38                          | 0.31               | 4.30                  |
| P04004            | Vitronectin;                                              | -0.16                                         | -0.03                          | 0.79               | 3.10                  |
| O75083            | WD repeat-containing protein 1;                           | -1.04                                         | -0.43                          | 0.25               | 9.10                  |
| Q9BV38            | WD repeat-containing protein 18;                          | 2.00                                          | 0.15                           | 0.01               | 1.90                  |
| Q15061            | WD repeat-containing protein 43;                          | 1.34                                          | 0.23                           | 0.09               | 2.80                  |
| P61964            | WD repeat-containing protein 5;                           | 0.52                                          | 0.04                           | 0.52               | 4.80                  |
| Q8IWA0            | WD repeat-containing protein 75;                          | 3.32                                          | 0.34                           | 0.00               | 2.30                  |
| Q96FK6            | WD repeat-containing protein 89;                          | 1.70                                          | 0.45                           | 0.05               | 4.70                  |
| Q2TAY7            | WD40 repeat-containing protein SMU1;                      | 1.76                                          | 0.68                           | 0.07               | 6.40                  |
| P13010            | X-ray repair cross-complementing protein 5;               | 0.25                                          | 0.07                           | 0.81               | 15.00                 |
| P12956            | X-ray repair cross-complementing protein 6;               | 0.30                                          | 0.07                           | 0.75               | 25.00                 |
| Q9H1B5            | Xylosyltransferase 2;                                     | -0.53                                         | -0.15                          | 0.49               | 2.70                  |
| P49750            | YLP motif-containing protein 1;                           | 1.16                                          | 0.17                           | 0.15               | 1.10                  |
| Q7Z739            | YTH domain family protein 3;                              | 0.52                                          | 0.03                           | 0.52               | 1.60                  |
| O75152            | Zinc finger CCCH domain-containing protein 11A;           | 1.90                                          | 0.14                           | 0.01               | 1.60                  |
| Q8WU90            | Zinc finger CCCH domain-containing protein 15;            | -2.60                                         | -0.95                          | 0.00               | 7.30                  |
| O43670            | Zinc finger protein 207;                                  | -0.60                                         | -0.24                          | 0.50               | 8.80                  |
| Q8TAW3            | Zinc finger protein 671;                                  | 4.95                                          | 0.89                           | 0.00               | 1.50                  |
| Q96KR1            | Zinc finger RNA-binding protein;                          | 5.81                                          | 2.02                           | 0.00               | 2.00                  |
| P25311            | Zinc-alpha-2-glycoprotein;                                | -1.90                                         | -0.14                          | 0.01               | 4.00                  |
| P51688            |                                                           | -0.22                                         | -0.16                          | 0.84               | 9.20                  |
| Q9BRK5            |                                                           | 0.19                                          | 0.02                           | 0.84               | 20.70                 |

Table S2

| Uniprot accession | Name | Fold-change (log <sub>2</sub> ) of ASAPratio | Fold-change standard deviation | ASAPratio p-value | Sequence coverage (%) |
|-------------------|------|----------------------------------------------|--------------------------------|-------------------|-----------------------|
| P54577            |      | 0.19                                         | 0.02                           | 0.84              | 4.70                  |
| Q13283            |      | -0.12                                        | -0.03                          | 0.84              | 30.90                 |
| Q8NHP8            |      | 0.26                                         | 0.13                           | 0.84              | 13.60                 |
| Q9BS26            |      | 0.32                                         | 0.24                           | 0.84              | 7.60                  |
| P00492            |      | 0.21                                         | 0.06                           | 0.84              | 37.60                 |
| Q9UBT2            |      | 0.52                                         | 0.79                           | 0.84              | 4.80                  |
| P20618            |      | -0.11                                        | -0.01                          | 0.84              | 38.60                 |
| Q9H0C8            |      | -0.11                                        | -0.01                          | 0.84              | 3.10                  |
| P30566            |      | 0.19                                         | 0.03                           | 0.84              | 4.10                  |
| P23284            |      | -0.19                                        | -0.11                          | 0.84              | 34.70                 |
| Q92820            |      | -0.11                                        | -0.01                          | 0.84              | 24.20                 |
| P61970            |      | -0.11                                        | -0.01                          | 0.84              | 16.50                 |
| P36952            |      | -0.11                                        | -0.02                          | 0.85              | 16.30                 |
| Q9GZP4            |      | -0.11                                        | -0.02                          | 0.85              | 15.20                 |
| Q96GQ7            |      | -0.22                                        | -0.18                          | 0.85              | 2.80                  |
| Q16531            |      | 0.19                                         | 0.04                           | 0.85              | 4.60                  |
| P07858            |      | -0.12                                        | -0.04                          | 0.85              | 26.00                 |
| P49327            |      | 0.27                                         | 0.17                           | 0.85              | 9.60                  |
| O95881            |      | -0.16                                        | -0.09                          | 0.85              | 17.40                 |
| Q96IU4            |      | 0.18                                         | 0.01                           | 0.85              | 11.40                 |
| P62081            |      | 0.23                                         | 0.10                           | 0.85              | 19.10                 |
| Q9HAV7            |      | -0.11                                        | -0.02                          | 0.85              | 5.10                  |
| P20062            |      | -0.22                                        | -0.19                          | 0.85              | 4.20                  |
| P04040            |      | 0.18                                         | 0.02                           | 0.85              | 10.20                 |
| P62280            |      | 0.23                                         | 0.11                           | 0.85              | 27.80                 |
| P51149            |      | 0.18                                         | 0.02                           | 0.85              | 6.30                  |
| O14672            |      | 0.21                                         | 0.08                           | 0.86              | 8.40                  |
| P29218            |      | -0.11                                        | -0.03                          | 0.86              | 8.30                  |
| Q9Y265            |      | -0.12                                        | -0.05                          | 0.86              | 18.90                 |
| P50914            |      | 0.59                                         | 1.18                           | 0.86              | 9.80                  |
| P52565            |      | -0.09                                        | -0.01                          | 0.86              | 7.40                  |
| P17050            |      | -0.09                                        | -0.01                          | 0.86              | 5.10                  |
| Q9Y287            |      | 0.18                                         | 0.03                           | 0.86              | 6.80                  |
| Q15417            |      | -0.12                                        | -0.05                          | 0.86              | 13.70                 |
| Q9P258            |      | -0.12                                        | -0.05                          | 0.86              | 10.50                 |
| Q9UBP4            |      | -0.09                                        | -0.01                          | 0.86              | 6.30                  |
| O75718            |      | -0.09                                        | -0.01                          | 0.86              | 2.70                  |
| P63208            |      | -0.11                                        | -0.03                          | 0.86              | 20.20                 |
| O75509            |      | -0.09                                        | -0.01                          | 0.86              | 4.60                  |
| P49736            |      | -0.14                                        | -0.08                          | 0.86              | 2.80                  |
| Q14155            |      | 0.18                                         | 0.04                           | 0.86              | 1.20                  |
| P50454            |      | -0.21                                        | -0.18                          | 0.86              | 11.70                 |
| P37802            |      | 0.19                                         | 0.07                           | 0.86              | 35.20                 |
| P62891            |      | -0.09                                        | -0.02                          | 0.87              | 19.60                 |
| O00505            |      | -0.09                                        | -0.02                          | 0.87              | 2.50                  |
| P55884            |      | 0.23                                         | 0.13                           | 0.87              | 12.20                 |
| Q6EMK4            |      | -0.11                                        | -0.04                          | 0.87              | 8.00                  |
| Q9UGV2            |      | 0.17                                         | 0.01                           | 0.87              | 4.00                  |
| Q09666            |      | -0.22                                        | -0.22                          | 0.87              | 11.20                 |
| P46783            |      | -0.09                                        | -0.02                          | 0.87              | 14.50                 |
| P12429            |      | 0.40                                         | 0.54                           | 0.87              | 22.60                 |
| P04844            |      | 0.52                                         | 1.00                           | 0.87              | 4.90                  |
| Q9HC38            |      | 0.17                                         | 0.02                           | 0.87              | 10.50                 |
| Q9HB07            |      | 0.17                                         | 0.02                           | 0.87              | 3.70                  |
| O14950            |      | -0.09                                        | -0.02                          | 0.87              | 23.40                 |
| P61204            |      | 0.19                                         | 0.08                           | 0.87              | 26.00                 |
| P31948            |      | -0.12                                        | -0.06                          | 0.88              | 9.80                  |

Table S2

| Uniprot accession | Name | Fold-change (log <sub>2</sub> ) of ASAPratio | Fold-change standard deviation | ASAPratio p-value | Sequence coverage (%) |
|-------------------|------|----------------------------------------------|--------------------------------|-------------------|-----------------------|
| P48643            |      | -0.11                                        | -0.05                          | 0.88              | 15.50                 |
| P62333            |      | -0.08                                        | 0.00                           | 0.88              | 5.70                  |
| P62899            |      | -0.08                                        | 0.00                           | 0.88              | 21.60                 |
| P31150            |      | -0.08                                        | 0.00                           | 0.88              | 4.90                  |
| P51665            |      | -0.08                                        | 0.00                           | 0.88              | 3.10                  |
| P98175            |      | -0.08                                        | -0.01                          | 0.88              | 1.40                  |
| Q04637            |      | -0.12                                        | -0.07                          | 0.88              | 5.40                  |
| P16144            |      | -0.14                                        | -0.10                          | 0.88              | 9.30                  |
| Q9NWV4            |      | -0.12                                        | -0.07                          | 0.88              | 15.00                 |
| Q14566            |      | 0.17                                         | 0.04                           | 0.88              | 9.10                  |
| Q15365            |      | 0.17                                         | 0.04                           | 0.88              | 25.60                 |
| Q15366            |      | -0.12                                        | -0.01                          | 0.82              | 14.20                 |
| P04792            |      | -0.11                                        | -0.05                          | 0.88              | 24.40                 |
| P61158            |      | -0.08                                        | -0.01                          | 0.88              | 18.90                 |
| P53041            |      | 0.15                                         | 0.01                           | 0.88              | 1.40                  |
| Q92688            |      | 0.15                                         | 0.01                           | 0.89              | 19.90                 |
| P49720            |      | 0.15                                         | 0.01                           | 0.89              | 7.80                  |
| Q96I99            |      | -0.08                                        | -0.02                          | 0.89              | 2.30                  |
| Q9BXP5            |      | -0.14                                        | -0.10                          | 0.89              | 2.40                  |
| P33991            |      | 0.15                                         | 0.01                           | 0.89              | 5.70                  |
| Q9GZX9            |      | 0.15                                         | 0.01                           | 0.89              | 6.70                  |
| Q02818            |      | 0.18                                         | 0.08                           | 0.89              | 27.50                 |
| Q9P0S2            |      | 0.15                                         | 0.02                           | 0.89              | 13.20                 |
| Q6DKI1            |      | 0.34                                         | 0.46                           | 0.89              | 10.60                 |
| Q96PK2            |      | -0.08                                        | -0.02                          | 0.89              | 0.50                  |
| Q9UQ35            |      | -0.28                                        | -0.42                          | 0.89              | 2.60                  |
| Q9HB40            |      | -0.21                                        | -0.23                          | 0.89              | 4.60                  |
| P07237            |      | 0.15                                         | 0.03                           | 0.89              | 29.70                 |
| Q09028            |      | 0.15                                         | 0.04                           | 0.89              | 11.30                 |
| P62277            |      | -0.08                                        | -0.02                          | 0.90              | 24.50                 |
| P08670            |      | -0.08                                        | -0.02                          | 0.90              | 42.50                 |
| P06744            |      | 0.15                                         | 0.04                           | 0.90              | 24.90                 |
| P40926            |      | -0.11                                        | -0.07                          | 0.90              | 42.30                 |
| Q14008            |      | 0.17                                         | 0.07                           | 0.90              | 2.00                  |
| P30085            |      | -0.05                                        | 0.00                           | 0.90              | 16.80                 |
| O15371            |      | -0.05                                        | 0.00                           | 0.90              | 3.10                  |
| P24534            |      | -0.08                                        | -0.03                          | 0.90              | 23.60                 |
| Q9NYL9            |      | -0.08                                        | -0.03                          | 0.90              | 2.60                  |
| Q15233            |      | 0.15                                         | 0.04                           | 0.90              | 9.30                  |
| P02768            |      | -0.16                                        | -0.16                          | 0.90              | 4.60                  |
| P07954            |      | 0.15                                         | 0.05                           | 0.90              | 10.00                 |
| P09960            |      | 0.17                                         | 0.07                           | 0.90              | 25.70                 |
| Q15185            |      | 0.14                                         | 0.01                           | 0.90              | 13.10                 |
| Q15257            |      | -0.08                                        | -0.03                          | 0.90              | 9.50                  |
| P98179            |      | 0.14                                         | 0.02                           | 0.90              | 21.00                 |
| O75369            |      | 0.18                                         | 0.11                           | 0.90              | 22.50                 |
| O43707            |      | 0.14                                         | 0.02                           | 0.90              | 43.40                 |
| P12814            |      | 0.23                                         | 0.09                           | 0.84              | 37.80                 |
| Q14157            |      | -0.05                                        | -0.01                          | 0.90              | 2.90                  |
| O75787            |      | -0.11                                        | -0.07                          | 0.91              | 12.90                 |
| P78330            |      | -0.05                                        | -0.01                          | 0.91              | 17.30                 |
| Q9H0D6            |      | 0.21                                         | 0.17                           | 0.91              | 3.80                  |
| P39687            |      | 0.14                                         | 0.02                           | 0.91              | 23.70                 |
| Q9NYF8            |      | -0.08                                        | -0.03                          | 0.91              | 4.60                  |
| P47755            |      | -0.05                                        | -0.01                          | 0.91              | 10.80                 |
| Q9BVM2            |      | 0.17                                         | 0.09                           | 0.91              | 10.30                 |
| P48745            |      | -0.05                                        | -0.01                          | 0.91              | 7.60                  |

Table S2

| Uniprot accession | Name | Fold-change (log <sub>2</sub> ) of ASAPratio | Fold-change standard deviation | ASAPratio p-value | Sequence coverage (%) |
|-------------------|------|----------------------------------------------|--------------------------------|-------------------|-----------------------|
| Q96I24            |      | 0.26                                         | 0.31                           | 0.91              | 6.10                  |
| P98088            |      | 0.15                                         | 0.07                           | 0.91              | 1.60                  |
| Q13435            |      | -0.08                                        | -0.04                          | 0.91              | 6.70                  |
| P52292            |      | 0.14                                         | 0.04                           | 0.91              | 6.40                  |
| P08729            |      | -0.09                                        | -0.06                          | 0.92              | 16.80                 |
| P62263            |      | -0.08                                        | -0.04                          | 0.92              | 15.20                 |
| Q9UHG2            |      | -0.03                                        | 0.00                           | 0.92              | 31.20                 |
| P13693            |      | -0.05                                        | -0.02                          | 0.92              | 23.80                 |
| Q8WVQ1            |      | -0.05                                        | -0.02                          | 0.92              | 20.00                 |
| P68036            |      | -0.03                                        | 0.00                           | 0.92              | 33.10                 |
| Q9NQW7            |      | -0.03                                        | 0.00                           | 0.92              | 5.00                  |
| P62937            |      | -0.03                                        | 0.00                           | 0.92              | 36.40                 |
| Q02878            |      | -0.03                                        | -0.01                          | 0.92              | 16.30                 |
| Q8NC56            |      | -0.19                                        | -0.29                          | 0.92              | 4.80                  |
| Q15904            |      | -0.03                                        | -0.01                          | 0.92              | 18.10                 |
| P52209            |      | 0.11                                         | 0.02                           | 0.92              | 19.50                 |
| O00592            |      | 0.32                                         | 0.58                           | 0.92              | 4.10                  |
| Q12904            |      | -0.03                                        | -0.01                          | 0.92              | 11.50                 |
| Q13813            |      | 0.14                                         | 0.06                           | 0.92              | 10.50                 |
| P63010            |      | 0.11                                         | 0.02                           | 0.92              | 6.50                  |
| Q01105            |      | -0.03                                        | -0.01                          | 0.93              | 30.00                 |
| P61088            |      | -0.03                                        | -0.01                          | 0.93              | 23.70                 |
| O00139            |      | -0.05                                        | -0.02                          | 0.93              | 2.50                  |
| O94985            |      | 0.11                                         | 0.03                           | 0.93              | 15.80                 |
| P54802            |      | -0.05                                        | -0.02                          | 0.93              | 5.20                  |
| P62258            |      | 0.11                                         | 0.04                           | 0.93              | 47.50                 |
| Q9NPR2            |      | -0.11                                        | -0.12                          | 0.93              | 5.40                  |
| O15230            |      | 0.14                                         | 0.08                           | 0.93              | 17.90                 |
| Q8NFZ8            |      | -0.03                                        | -0.01                          | 0.94              | 13.90                 |
| Q14974            |      | 0.11                                         | 0.04                           | 0.94              | 10.70                 |
| P31939            |      | -0.05                                        | -0.03                          | 0.94              | 14.90                 |
| Q8N114            |      | -0.01                                        | 0.00                           | 0.94              | 2.90                  |
| P83916            |      | -0.01                                        | 0.00                           | 0.94              | 14.60                 |
| P60983            |      | 0.10                                         | 0.01                           | 0.94              | 14.10                 |
| O60749            |      | 0.10                                         | 0.01                           | 0.94              | 1.90                  |
| Q86UD1            |      | -0.01                                        | 0.00                           | 0.94              | 3.30                  |
| Q12792            |      | -0.01                                        | 0.00                           | 0.94              | 6.30                  |
| Q9NQP4            |      | -0.01                                        | 0.00                           | 0.94              | 9.00                  |
| Q9BZM5            |      | 0.10                                         | 0.01                           | 0.94              | 8.50                  |
| Q9UNS2            |      | -0.01                                        | 0.00                           | 0.94              | 3.50                  |
| P61221            |      | 0.10                                         | 0.01                           | 0.94              | 3.30                  |
| Q99650            |      | -0.01                                        | 0.00                           | 0.94              | 1.00                  |
| O95810            |      | -0.01                                        | 0.00                           | 0.94              | 10.40                 |
| Q13423            |      | 0.19                                         | 0.24                           | 0.94              | 4.00                  |
| Q16181            |      | -0.01                                        | 0.00                           | 0.94              | 5.30                  |
| P04083            |      | -0.12                                        | -0.17                          | 0.94              | 57.20                 |
| Q99436            |      | -0.01                                        | 0.00                           | 0.94              | 7.60                  |
| P98160            |      | 0.14                                         | 0.09                           | 0.94              | 14.40                 |
| P48147            |      | -0.05                                        | -0.03                          | 0.94              | 5.50                  |
| Q15907            |      | -0.01                                        | 0.00                           | 0.94              | 39.40                 |
| O14737            |      | 0.10                                         | 0.02                           | 0.94              | 19.20                 |
| Q13451            |      | -0.01                                        | 0.00                           | 0.94              | 3.50                  |
| P62993            |      | 0.10                                         | 0.02                           | 0.94              | 24.90                 |
| O00391            |      | -0.01                                        | 0.00                           | 0.94              | 21.70                 |
| Q8IWU5            |      | 0.10                                         | 0.02                           | 0.94              | 8.60                  |
| P30153            |      | -0.01                                        | 0.00                           | 0.94              | 20.00                 |
| Q9BXJ9            |      | -0.08                                        | -0.07                          | 0.94              | 2.10                  |

Table S2

| Uniprot accession | Name | Fold-change (log <sub>2</sub> ) of ASAPratio | Fold-change standard deviation | ASAPratio p-value | Sequence coverage (%) |
|-------------------|------|----------------------------------------------|--------------------------------|-------------------|-----------------------|
| P31040            |      | -0.39                                        | -1.62                          | 0.94              | 4.80                  |
| O95777            |      | -0.01                                        | 0.00                           | 0.95              | 27.10                 |
| P30626            |      | 0.10                                         | 0.03                           | 0.95              | 38.40                 |
| P09012            |      | 0.10                                         | 0.04                           | 0.95              | 8.90                  |
| P04080            |      | -0.01                                        | -0.01                          | 0.95              | 19.40                 |
| Q9UBR2            |      | -0.01                                        | -0.01                          | 0.95              | 15.80                 |
| P02753            |      | -0.11                                        | -0.18                          | 0.95              | 10.90                 |
| C9JH25            |      | -0.37                                        | -1.76                          | 0.95              | 2.20                  |
| Q9NPH2            |      | 0.11                                         | 0.08                           | 0.95              | 4.80                  |
| P52655            |      | 0.09                                         | 0.00                           | 0.95              | 2.90                  |
| Q08431            |      | 0.09                                         | 0.00                           | 0.95              | 2.60                  |
| Q13867            |      | -0.01                                        | -0.01                          | 0.95              | 7.90                  |
| Q12765            |      | 0.00                                         | 0.00                           | 0.96              | 7.70                  |
| P01009            |      | 0.09                                         | 0.01                           | 0.96              | 14.10                 |
| Q9UL46            |      | 0.00                                         | 0.00                           | 0.96              | 3.80                  |
| Q15847            |      | 0.00                                         | 0.00                           | 0.96              | 18.40                 |
| P46777            |      | 0.09                                         | 0.01                           | 0.96              | 15.80                 |
| Q16851            |      | 0.00                                         | 0.00                           | 0.96              | 1.80                  |
| Q5SR19            |      | -0.03                                        | -0.03                          | 0.96              | 4.30                  |
| P35080            |      | 0.09                                         | 0.02                           | 0.96              | 10.00                 |
| P35052            |      | -0.01                                        | -0.01                          | 0.96              | 14.70                 |
| P23588            |      | 0.00                                         | 0.00                           | 0.96              | 6.10                  |
| P04062            |      | 0.09                                         | 0.02                           | 0.96              | 17.00                 |
| O00410            |      | 0.00                                         | 0.00                           | 0.96              | 6.70                  |
| Q12906            |      | -0.08                                        | -0.11                          | 0.96              | 13.00                 |
| P63241            |      | 0.09                                         | 0.03                           | 0.96              | 19.00                 |
| P26639            |      | -0.01                                        | -0.01                          | 0.97              | 11.60                 |
| Q01082            |      | 0.00                                         | 0.00                           | 0.97              | 6.20                  |
| Q9NRN7            |      | -0.03                                        | -0.04                          | 0.97              | 5.50                  |
| P48723            |      | 0.11                                         | 0.13                           | 0.97              | 21.00                 |
| Q92945            |      | -0.01                                        | -0.01                          | 0.97              | 12.00                 |
| Q15181            |      | 0.09                                         | 0.05                           | 0.97              | 19.00                 |
| P00491            |      | -0.01                                        | -0.01                          | 0.97              | 13.50                 |
| P48681            |      | 0.00                                         | 0.00                           | 0.97              | 2.00                  |
| Q6P5R6            |      | 0.07                                         | 0.01                           | 0.97              | 9.80                  |
| Q5VY43            |      | 0.07                                         | 0.01                           | 0.97              | 1.10                  |
| O14818            |      | 0.07                                         | 0.01                           | 0.97              | 18.50                 |
| Q13554            |      | 0.07                                         | 0.01                           | 0.97              | 2.50                  |
| O14773            |      | 0.07                                         | 0.01                           | 0.97              | 8.20                  |
| Q9Y383            |      | 0.07                                         | 0.01                           | 0.97              | 6.40                  |
| Q9UHX1            |      | 0.09                                         | 0.06                           | 0.97              | 14.50                 |
| O00115            |      | 0.01                                         | 0.00                           | 0.97              | 13.10                 |
| P28074            |      | 0.01                                         | 0.00                           | 0.97              | 4.60                  |
| P62244            |      | 0.01                                         | 0.00                           | 0.97              | 13.80                 |
| Q641Q3            |      | 0.01                                         | 0.00                           | 0.97              | 7.70                  |
| Q14703            |      | 0.01                                         | 0.00                           | 0.97              | 0.80                  |
| P34897            |      | 0.01                                         | 0.00                           | 0.97              | 3.20                  |
| P09601            |      | 0.01                                         | 0.00                           | 0.97              | 5.60                  |
| P60900            |      | 0.07                                         | 0.02                           | 0.97              | 13.00                 |
| P09497            |      | 0.01                                         | 0.00                           | 0.98              | 12.70                 |
| Q9BWS9            |      | 0.01                                         | 0.00                           | 0.98              | 3.60                  |
| Q06481            |      | 0.07                                         | 0.02                           | 0.98              | 7.90                  |
| O15355            |      | 0.01                                         | 0.00                           | 0.98              | 11.50                 |
| P25205            |      | 0.01                                         | 0.00                           | 0.98              | 3.70                  |
| O75937            |      | 0.07                                         | 0.02                           | 0.98              | 9.90                  |
| P37837            |      | 0.07                                         | 0.02                           | 0.98              | 22.60                 |
| P37235            |      | 0.07                                         | 0.03                           | 0.98              | 22.30                 |



Table S2

| <b>Uniprot accession</b> | <b>Name</b> | <b>Fold-change (log<sub>2</sub>) of ASAPratio</b> | <b>Fold-change standard deviation</b> | <b>ASAPratio p-value</b> | <b>Sequence coverage (%)</b> |
|--------------------------|-------------|---------------------------------------------------|---------------------------------------|--------------------------|------------------------------|
| P55058                   |             | -0.01                                             | -0.02                                 | 0.98                     | 24.50                        |
| P25788                   |             | 0.11                                              | 0.20                                  | 0.98                     | 12.90                        |
| Q96PZ0                   |             | 0.07                                              | 0.03                                  | 0.98                     | 3.60                         |
| P06865                   |             | 0.09                                              | 0.08                                  | 0.98                     | 21.40                        |
| P07602                   |             | 0.00                                              | 0.00                                  | 0.98                     | 12.80                        |
| P07814                   |             | 0.07                                              | 0.05                                  | 0.98                     | 7.40                         |
| O43505                   |             | 0.01                                              | 0.01                                  | 0.98                     | 18.80                        |
| Q13620                   |             | 0.09                                              | 0.13                                  | 0.99                     | 2.20                         |
| P09874                   |             | 0.01                                              | 0.01                                  | 0.99                     | 15.40                        |
| P43034                   |             | 0.06                                              | 0.00                                  | 0.99                     | 6.80                         |
| Q9UNE7                   |             | 0.06                                              | 0.00                                  | 0.99                     | 10.20                        |
| O75882                   |             | 0.06                                              | 0.01                                  | 0.99                     | 2.40                         |
| Q13685                   |             | 0.06                                              | 0.01                                  | 0.99                     | 3.00                         |
| P15531                   |             | 0.06                                              | 0.01                                  | 0.99                     | 57.20                        |
| P22392                   |             | 0.25                                              | 0.03                                  | 0.79                     | 47.40                        |
| P26368                   |             | 0.06                                              | 0.01                                  | 0.99                     | 15.40                        |
| P78347                   |             | 0.06                                              | 0.02                                  | 0.99                     | 2.40                         |
| Q9Y266                   |             | 0.06                                              | 0.02                                  | 0.99                     | 10.30                        |
| P43686                   |             | 0.04                                              | 0.00                                  | 0.99                     | 6.50                         |
| Q9Y3A5                   |             | 0.04                                              | 0.00                                  | 0.99                     | 7.20                         |
| P49721                   |             | 0.04                                              | 0.01                                  | 0.99                     | 10.00                        |
| P46926                   |             | 0.04                                              | 0.01                                  | 0.99                     | 11.40                        |
| P36957                   |             | 0.01                                              | 0.03                                  | 0.99                     | 7.90                         |
| P43251                   |             | 0.04                                              | 0.02                                  | 0.99                     | 5.70                         |
| P49588                   |             | 0.04                                              | 0.02                                  | 1.00                     | 4.60                         |
