# Supplementary material for: Secretome and degradome profiling shows that Kallikrein‐related peptidases 4, 5, 6, and 7 induce TGFβ‐1 signaling in ovarian cancer cells
Source: PubMed Central journal article supplement — Mol Oncol. 2013 Oct 1;8(1):68–82. doi: 10.1016/j.molonc.2013.09.003 (PMC5528505; doi:10.1016/j.molonc.2013.09.003), 2013-10-01
Supplement: MOL2-8-068-s004.pdf [file MOL2-8-068-s004.pdf]

Table S4

Table S4: Proteins that are identified and quantified in all three replicates of global proteome comparison

Averaged ratios are normalized to hK expression / control.

| Uniprot accession | Name                                                  | Averaged fold-                             | Combined              |
|-------------------|-------------------------------------------------------|--------------------------------------------|-----------------------|
|                   |                                                       | change (log <sub>2</sub> ) of<br>ASAPratio | ASPARatio p-<br>value |
| Q04446            | 1,4-alpha-glucan-branching enzyme;                    | -0.48                                      | 0.80                  |
| P61604            | 10 kDa heat shock protein, mitochondrial;             | 0.49                                       | 0.54                  |
| Q15029            | 116 kDa U5 small nuclear ribonucleoprotein component; | 0.02                                       | 0.79                  |
| P31946            | 14-3-3 protein beta/alpha;                            | -0.72                                      | 0.58                  |
| P62258            | 14-3-3 protein epsilon;                               | 0.12                                       | 0.73                  |
| Q04917            | 14-3-3 protein eta;                                   | -0.35                                      | 0.95                  |
| P61981            | 14-3-3 protein gamma;                                 | -0.40                                      | 0.84                  |
| P31947            | 14-3-3 protein sigma;                                 | -0.43                                      | 0.87                  |
| P27348            | 14-3-3 protein theta;                                 | -0.30                                      | 0.94                  |
| P63104            | 14-3-3 protein zeta/delta;                            | -0.32                                      | 0.95                  |
| P62333            | 26S protease regulatory subunit 10B;                  | 0.43                                       | 0.78                  |
| P43686            | 26S protease regulatory subunit 6B;                   | 0.62                                       | 0.58                  |
| O00231            | 26S proteasome non-ATPase regulatory subunit 11;      | 0.54                                       | 0.71                  |
| Q13200            | 26S proteasome non-ATPase regulatory subunit 2;       | 0.39                                       | 0.77                  |
| O43242            | 26S proteasome non-ATPase regulatory subunit 3;       | 0.76                                       | 0.40                  |
| Q15008            | 26S proteasome non-ATPase regulatory subunit 6;       | 0.45                                       | 0.59                  |
| O00233            | 26S proteasome non-ATPase regulatory subunit 9;       | 0.15                                       | 0.78                  |
| P31937            | 3-hydroxyisobutyrate dehydrogenase, mitochondrial;    | -0.14                                      | 0.88                  |
| O95861            | 3'(2'),5'-biphosphate nucleotidase 1;                 | -0.37                                      | 0.75                  |
| P46783            | 40S ribosomal protein S10;                            | 0.03                                       | 0.87                  |
| P62280            | 40S ribosomal protein S11;                            | 0.60                                       | 0.81                  |
| P25398            | 40S ribosomal protein S12;                            | 0.23                                       | 0.90                  |
| P62277            | 40S ribosomal protein S13;                            | 0.30                                       | 0.83                  |
| P62263            | 40S ribosomal protein S14;                            | 0.30                                       | 0.85                  |
| P62841            | 40S ribosomal protein S15;                            | 0.09                                       | 0.91                  |
| P62244            | 40S ribosomal protein S15a;                           | 0.02                                       | 0.99                  |
| P62249            | 40S ribosomal protein S16;                            | 0.57                                       | 0.40                  |
| P62269            | 40S ribosomal protein S18;                            | 0.17                                       | 0.91                  |
| P39019            | 40S ribosomal protein S19;                            | 0.03                                       | 0.98                  |
| P15880            | 40S ribosomal protein S2;                             | 0.04                                       | 0.97                  |
| P63220            | 40S ribosomal protein S21;                            | -0.03                                      | 0.96                  |
| P62266            | 40S ribosomal protein S23;                            | 1.75                                       | 0.00                  |
| Q71UM5            | 40S ribosomal protein S27-like;                       | 0.63                                       | 0.59                  |
| P42677            | 40S ribosomal protein S27;                            | 0.75                                       | 0.39                  |
| P62857            | 40S ribosomal protein S28;                            | 0.29                                       | 0.59                  |
| P23396            | 40S ribosomal protein S3;                             | 0.25                                       | 0.90                  |
| P61247            | 40S ribosomal protein S3a;                            | 0.38                                       | 0.90                  |
| P62701            | 40S ribosomal protein S4, X isoform;                  | 0.20                                       | 0.85                  |
| P46782            | 40S ribosomal protein S5;                             | -0.17                                      | 0.90                  |
| P62753            | 40S ribosomal protein S6;                             | -0.03                                      | 0.88                  |
| P62081            | 40S ribosomal protein S7;                             | 0.15                                       | 0.96                  |
| P62241            | 40S ribosomal protein S8;                             | 0.26                                       | 0.78                  |
| P46781            | 40S ribosomal protein S9;                             | 0.46                                       | 0.69                  |
| P08865            | 40S ribosomal protein SA;                             | -0.16                                      | 0.99                  |

Table S4

| Uniprot accession | Name                                                 | Averaged fold-change (log <sub>2</sub> ) of ASAPratio | Combined ASPAratio p-value |
|-------------------|------------------------------------------------------|-------------------------------------------------------|----------------------------|
| Q9BRK5            | 45 kDa calcium-binding protein;                      | 0.46                                                  | 0.85                       |
| P08195            | 4F2 cell-surface antigen heavy chain;                | 0.78                                                  | 0.68                       |
| Q9H0D6            | 5'-3' exoribonuclease 2;                             | -0.06                                                 | 0.95                       |
| Q01813            | 6-phosphofructokinase type C;                        | -0.86                                                 | 0.56                       |
| P08237            | 6-phosphofructokinase, muscle type;                  | -0.03                                                 | 0.63                       |
| P52209            | 6-phosphogluconate dehydrogenase, decarboxylating;   | -0.03                                                 | 1.00                       |
| O95336            | 6-phosphogluconolactonase;                           | -1.00                                                 | 0.53                       |
| P10809            | 60 kDa heat shock protein, mitochondrial;            | 0.91                                                  | 0.28                       |
| P05388            | 60S acidic ribosomal protein P0;                     | 1.00                                                  | 0.29                       |
| P05386            | 60S acidic ribosomal protein P1;                     | 0.97                                                  | 0.22                       |
| P05387            | 60S acidic ribosomal protein P2;                     | 0.49                                                  | 0.76                       |
| P62906            | 60S ribosomal protein L10a;                          | 0.61                                                  | 0.61                       |
| P62913            | 60S ribosomal protein L11;                           | 0.33                                                  | 0.92                       |
| P26373            | 60S ribosomal protein L13;                           | 0.05                                                  | 0.82                       |
| P50914            | 60S ribosomal protein L14;                           | 0.43                                                  | 0.83                       |
| P61313            | 60S ribosomal protein L15;                           | 0.15                                                  | 0.83                       |
| P18621            | 60S ribosomal protein L17;                           | 0.03                                                  | 0.83                       |
| Q07020            | 60S ribosomal protein L18;                           | -0.05                                                 | 0.93                       |
| Q02543            | 60S ribosomal protein L18a;                          | 0.23                                                  | 0.48                       |
| P46778            | 60S ribosomal protein L21;                           | -0.05                                                 | 0.76                       |
| P62829            | 60S ribosomal protein L23;                           | -0.20                                                 | 0.76                       |
| P62750            | 60S ribosomal protein L23a;                          | 0.12                                                  | 0.83                       |
| P83731            | 60S ribosomal protein L24;                           | 0.03                                                  | 0.84                       |
| P61353            | 60S ribosomal protein L27;                           | 0.04                                                  | 0.96                       |
| P47914            | 60S ribosomal protein L29;                           | -0.01                                                 | 0.63                       |
| P39023            | 60S ribosomal protein L3;                            | 0.01                                                  | 0.81                       |
| P62888            | 60S ribosomal protein L30;                           | -0.48                                                 | 0.92                       |
| P62899            | 60S ribosomal protein L31;                           | 0.19                                                  | 0.97                       |
| P62910            | 60S ribosomal protein L32;                           | -0.34                                                 | 0.92                       |
| P18077            | 60S ribosomal protein L35a;                          | 0.63                                                  | 0.22                       |
| P36578            | 60S ribosomal protein L4;                            | 0.16                                                  | 0.62                       |
| P46777            | 60S ribosomal protein L5;                            | -0.82                                                 | 0.54                       |
| Q02878            | 60S ribosomal protein L6;                            | 0.20                                                  | 0.97                       |
| P18124            | 60S ribosomal protein L7;                            | 0.12                                                  | 0.68                       |
| P62424            | 60S ribosomal protein L7a;                           | 0.17                                                  | 0.85                       |
| P32969            | 60S ribosomal protein L9;                            | -0.19                                                 | 0.97                       |
| P11021            | 78 kDa glucose-regulated protein;                    | 0.58                                                  | 0.67                       |
| Q02952            | A-kinase anchor protein 12;                          | -0.34                                                 | 0.93                       |
| Q13510            | Acid ceramidase;                                     | 0.04                                                  | 0.81                       |
| P39687            | Acidic leucine-rich nuclear phosphoprotein 32 family | -0.10                                                 | 0.94                       |
| Q92688            | Acidic leucine-rich nuclear phosphoprotein 32 family | -0.25                                                 | 0.93                       |
| Q9BTT0            | Acidic leucine-rich nuclear phosphoprotein 32 family | 0.18                                                  | 0.72                       |
| P61160            | Actin-related protein 2;                             | -0.38                                                 | 0.74                       |
| O15143            | Actin-related protein 2/3 complex subunit 1B;        | -0.20                                                 | 0.94                       |
| O15144            | Actin-related protein 2/3 complex subunit 2;         | -0.06                                                 | 0.80                       |

Table S4

| Uniprot accession | Name                                                    | Averaged fold-change (log <sub>2</sub> ) of ASAPratio | Combined ASPRatio p-value |
|-------------------|---------------------------------------------------------|-------------------------------------------------------|---------------------------|
| P59998            | Actin-related protein 2/3 complex subunit 4;            | 0.14                                                  | 0.84                      |
| P61158            | Actin-related protein 3;                                | -0.24                                                 | 0.87                      |
| P62736            | Actin, aortic smooth muscle;                            | 0.01                                                  | 0.53                      |
| P60709            | Actin, cytoplasmic 1;                                   | 0.12                                                  | 0.31                      |
| P53999            | Activated RNA polymerase II transcriptional coactivator | 0.82                                                  | 0.28                      |
| O95433            | Activator of 90 kDa heat shock protein ATPase homolog   | 0.38                                                  | 0.91                      |
| P07108            | Acyl-CoA-binding protein;                               | -0.01                                                 | 0.95                      |
| P13798            | Acylamino-acid-releasing enzyme;                        | -0.57                                                 | 0.68                      |
| P07311            | Acylphosphatase-1;                                      | -0.26                                                 | 0.49                      |
| Q6UY14            | ADAMTS-like protein 4;                                  | 0.20                                                  | 0.69                      |
| P23526            | Adenosylhomocysteinase;                                 | -0.76                                                 | 0.59                      |
| P54819            | Adenylate kinase 2, mitochondrial;                      | -1.01                                                 | 0.47                      |
| P30566            | Adenylosuccinate lyase;                                 | 0.16                                                  | 0.99                      |
| P30520            | Adenylosuccinate synthetase isozyme 2;                  | 0.51                                                  | 0.83                      |
| Q01518            | Adenylyl cyclase-associated protein 1;                  | -0.86                                                 | 0.53                      |
| P61204            | ADP-ribosylation factor 3;                              | -0.22                                                 | 0.94                      |
| Q9UKK9            | ADP-sugar pyrophosphatase;                              | -0.24                                                 | 0.92                      |
| O00468            | Aggrin;                                                 | 0.41                                                  | 0.66                      |
| P49588            | Alanine--tRNA ligase, cytoplasmic;                      | 0.26                                                  | 0.97                      |
| P14550            | Alcohol dehydrogenase [NADP(+)];                        | 0.53                                                  | 0.89                      |
| P11766            | Alcohol dehydrogenase class-3;                          | -0.98                                                 | 0.39                      |
| P47895            | Aldehyde dehydrogenase family 1 member A3;              | -0.71                                                 | 0.52                      |
| Q8IZ83            | Aldehyde dehydrogenase family 16 member A1;             | -0.55                                                 | 0.73                      |
| P15121            | Aldose reductase;                                       | -1.10                                                 | 0.27                      |
| P05187            | Alkaline phosphatase, placental type;                   | -0.48                                                 | 0.78                      |
| P01009            | Alpha-1-antitrypsin;                                    | 1.41                                                  | 0.02                      |
| P12814            | Alpha-actinin-1;                                        | 0.34                                                  | 0.97                      |
| O43707            | Alpha-actinin-4;                                        | -0.01                                                 | 0.99                      |
| P06733            | Alpha-enolase;                                          | -1.25                                                 | 0.23                      |
| P06280            | Alpha-galactosidase A;                                  | 0.84                                                  | 0.57                      |
| P35475            | Alpha-L-iduronidase;                                    | -0.38                                                 | 0.54                      |
| P54802            | Alpha-N-acetylglucosaminidase;                          | 0.52                                                  | 0.81                      |
| Q96IU4            | Alpha/beta hydrolase domain-containing protein 14B;     | 0.34                                                  | 0.88                      |
| Q12904            | Aminoacyl tRNA synthase complex-interacting             | -0.35                                                 | 0.97                      |
| Q9H4A4            | Aminopeptidase B;                                       | 0.31                                                  | 0.93                      |
| P05067            | Amyloid beta A4 protein;                                | 0.11                                                  | 0.85                      |
| Q06481            | Amyloid-like protein 2;                                 | 0.58                                                  | 0.71                      |
| Q13685            | Angio-associated migratory cell protein;                | 0.42                                                  | 0.80                      |
| P04083            | Annexin A1;                                             | -0.49                                                 | 0.88                      |
| P07355            | Annexin A2;                                             | -0.94                                                 | 0.36                      |
| P12429            | Annexin A3;                                             | 1.14                                                  | 0.53                      |
| P08758            | Annexin A5;                                             | -1.13                                                 | 0.29                      |
| P46013            | Antigen KI-67;                                          | 1.86                                                  | 0.00                      |
| O95782            | AP-2 complex subunit alpha-1;                           | -0.38                                                 | 0.90                      |
| P63010            | AP-2 complex subunit beta;                              | 0.21                                                  | 0.99                      |
| Q96CW1            | AP-2 complex subunit mu;                                | -0.34                                                 | 0.93                      |

Table S4

| Uniprot accession | Name                                                     | Averaged fold-change (log <sub>2</sub> ) of ASAPratio | Combined ASPAratio p-value |
|-------------------|----------------------------------------------------------|-------------------------------------------------------|----------------------------|
| P02656            | Apolipoprotein C-III;                                    | 0.57                                                  | 0.59                       |
| Q9BZZ5            | Apoptosis inhibitor 5;                                   | -0.44                                                 | 0.87                       |
| Q9UKV3            | Apoptotic chromatin condensation inducer in the nucleus; | 0.29                                                  | 0.71                       |
| P54136            | Arginine--tRNA ligase, cytoplasmic;                      | -0.46                                                 | 0.83                       |
| P04424            | Argininosuccinate lyase;                                 | -0.63                                                 | 0.57                       |
| P17174            | Aspartate aminotransferase, cytoplasmic;                 | -0.93                                                 | 0.76                       |
| P00505            | Aspartate aminotransferase, mitochondrial;               | -0.21                                                 | 0.87                       |
| P14868            | Aspartate--tRNA ligase, cytoplasmic;                     | 0.52                                                  | 0.61                       |
| Q8WWM7            | Ataxin-2-like protein;                                   | -0.85                                                 | 0.19                       |
| P61221            | ATP-binding cassette sub-family E member 1;              | -0.43                                                 | 0.95                       |
| Q8NE71            | ATP-binding cassette sub-family F member 1;              | -0.74                                                 | 0.54                       |
| P53396            | ATP-citrate synthase;                                    | -0.67                                                 | 0.69                       |
| Q08211            | ATP-dependent RNA helicase A;                            | 1.04                                                  | 0.46                       |
| Q92499            | ATP-dependent RNA helicase DDX1;                         | -0.55                                                 | 0.76                       |
| Q9NUU7            | ATP-dependent RNA helicase DDX19A;                       | 0.59                                                  | 0.58                       |
| O75882            | Attractin;                                               | 0.73                                                  | 0.44                       |
| P50895            | Basal cell adhesion molecule;                            | 0.24                                                  | 0.87                       |
| P98160            | Basement membrane-specific heparan sulfate               | 1.02                                                  | 0.48                       |
| P35613            | Basigin;                                                 | 0.72                                                  | 0.27                       |
| P15291            | Beta-1,4-galactosyltransferase 1;                        | 0.05                                                  | 0.96                       |
| O60513            | Beta-1,4-galactosyltransferase 4;                        | -1.02                                                 | 0.62                       |
| P02749            | Beta-2-glycoprotein 1;                                   | 0.68                                                  | 0.65                       |
| P16278            | Beta-galactosidase;                                      | 0.04                                                  | 0.85                       |
| P08236            | Beta-glucuronidase;                                      | 2.33                                                  | 0.07                       |
| P06865            | Beta-hexosaminidase subunit alpha;                       | 0.61                                                  | 0.78                       |
| P07686            | Beta-hexosaminidase subunit beta;                        | 1.03                                                  | 0.50                       |
| O43252            | Bifunctional 3'-phosphoadenosine 5'-phosphosulfate       | -0.90                                                 | 0.31                       |
| P07814            | Bifunctional glutamate/proline--tRNA ligase;             | 0.08                                                  | 1.00                       |
| P31939            | Bifunctional purine biosynthesis protein PURH;           | -0.17                                                 | 0.99                       |
| P43251            | Biotinidase;                                             | -0.07                                                 | 1.00                       |
| Q9H3K6            | BolA-like protein 2;                                     | -0.55                                                 | 0.75                       |
| P13497            | Bone morphogenetic protein 1;                            | 0.22                                                  | 0.85                       |
| Q9P287            | BRCA2 and CDKN1A-interacting protein;                    | 0.29                                                  | 0.83                       |
| P11586            | C-1-tetrahydrofolate synthase, cytoplasmic;              | -0.17                                                 | 0.99                       |
| P56545            | C-terminal-binding protein 2;                            | -0.02                                                 | 0.98                       |
| Q9UBG0            | C-type mannose receptor 2;                               | -2.60                                                 | 0.00                       |
| Q96EU7            | C1GALT1-specific chaperone 1;                            | 2.07                                                  | 0.02                       |
| P63098            | Calcineurin subunit B type 1;                            | 1.55                                                  | 0.01                       |
| Q9Y2V2            | Calcium-regulated heat stable protein 1;                 | -0.03                                                 | 0.48                       |
| Q13554            | Calcium/calmodulin-dependent protein kinase type II      | -0.03                                                 | 1.00                       |
| Q9HB71            | Calceylin-binding protein;                               | 0.14                                                  | 0.95                       |
| P62158            | Calmodulin;                                              | 0.21                                                  | 0.91                       |
| P17655            | Calpain-2 catalytic subunit;                             | 0.15                                                  | 0.96                       |
| Q15417            | Calponin-3;                                              | 0.00                                                  | 0.99                       |
| P27797            | Calreticulin;                                            | 0.84                                                  | 0.42                       |
| O94985            | Calsyntenin-1;                                           | 0.61                                                  | 0.74                       |
| O43852            | Calumenin;                                               | 1.31                                                  | 0.27                       |

Table S4

| <b>Uniprot accession</b> | <b>Name</b>                                                | <b>Averaged fold-change (log<sub>2</sub>) of ASAPratio</b> | <b>Combined ASPAratio p-value</b> |
|--------------------------|------------------------------------------------------------|------------------------------------------------------------|-----------------------------------|
| Q8NCH0                   | Carbohydrate sulfotransferase 14;                          | 0.13                                                       | 0.68                              |
| P19784                   | Casein kinase II subunit alpha';                           | 1.41                                                       | 0.00                              |
| P04040                   | Catalase;                                                  | -0.46                                                      | 0.85                              |
| P07858                   | Cathepsin B;                                               | 0.04                                                       | 0.83                              |
| P07339                   | Cathepsin D;                                               | 0.25                                                       | 0.79                              |
| P07711                   | Cathepsin L1;                                              | 2.16                                                       | 0.00                              |
| Q9UBR2                   | Cathepsin Z;                                               | 0.39                                                       | 0.91                              |
| P11717                   | Cation-independent mannose-6-phosphate receptor;           | 0.39                                                       | 0.88                              |
| Q03135                   | Caveolin-1;                                                | -0.09                                                      | 0.83                              |
| Q6YHK3                   | CD109 antigen;                                             | 0.72                                                       | 0.64                              |
| Q13740                   | CD166 antigen;                                             | 0.98                                                       | 0.35                              |
| Q9Y5K6                   | CD2-associated protein;                                    | -0.56                                                      | 0.64                              |
| P16070                   | CD44 antigen;                                              | -1.09                                                      | 0.33                              |
| P13987                   | CD59 glycoprotein;                                         | 1.65                                                       | 0.01                              |
| Q8NFZ8                   | Cell adhesion molecule 4;                                  | 0.78                                                       | 0.47                              |
| Q99459                   | Cell division cycle 5-like protein;                        | 0.77                                                       | 0.02                              |
| Q99674                   | Cell growth regulator with EF hand domain protein 1;       | 0.36                                                       | 0.85                              |
| O00299                   | Chloride intracellular channel protein 1;                  | 0.19                                                       | 0.98                              |
| Q9Y696                   | Chloride intracellular channel protein 4;                  | -0.53                                                      | 0.82                              |
| Q6UVK1                   | Chondroitin sulfate proteoglycan 4;                        | 0.20                                                       | 0.73                              |
| P83916                   | Chromobox protein homolog 1;                               | -0.46                                                      | 0.83                              |
| Q13185                   | Chromobox protein homolog 3;                               | -0.05                                                      | 0.87                              |
| P45973                   | Chromobox protein homolog 5;                               | -0.08                                                      | 0.82                              |
| O75390                   | Citrate synthase, mitochondrial;                           | 0.37                                                       | 0.90                              |
| Q00610                   | Clathrin heavy chain 1;                                    | 0.38                                                       | 0.88                              |
| Q10570                   | Cleavage and polyadenylation specificity factor subunit 1; | -0.18                                                      | 0.94                              |
| P10909                   | Clusterin;                                                 | -0.35                                                      | 0.85                              |
| Q14019                   | Coactosin-like protein;                                    | -0.55                                                      | 0.67                              |
| P48444                   | Coatomer subunit delta;                                    | -0.30                                                      | 0.91                              |
| O14579                   | Coatomer subunit epsilon;                                  | -0.09                                                      | 0.64                              |
| O43405                   | Cochlin;                                                   | 3.75                                                       | 0.00                              |
| P23528                   | Cofilin-1;                                                 | -0.26                                                      | 0.96                              |
| O75534                   | Cold shock domain-containing protein E1;                   | -0.04                                                      | 0.94                              |
| Q14011                   | Cold-inducible RNA-binding protein;                        | -0.39                                                      | 0.63                              |
| P12109                   | Collagen alpha-1(VI) chain;                                | 1.88                                                       | 0.01                              |
| Q99715                   | Collagen alpha-1(XII) chain;                               | -0.68                                                      | 0.62                              |
| P39060                   | Collagen alpha-1(XVIII) chain;                             | 1.67                                                       | 0.06                              |
| P05997                   | Collagen alpha-2(V) chain;                                 | 4.93                                                       | 0.00                              |
| P00736                   | Complement C1r subcomponent;                               | 1.02                                                       | 0.46                              |
| P01024                   | Complement C3;                                             | 2.24                                                       | 0.01                              |
| Q07021                   | Complement component 1 Q subcomponent-binding              | 0.61                                                       | 0.52                              |
| P00751                   | Complement factor B;                                       | 0.66                                                       | 0.60                              |
| P00746                   | Complement factor D;                                       | 1.26                                                       | 0.08                              |
| P29279                   | Connective tissue growth factor;                           | -0.70                                                      | 0.59                              |
| Q13098                   | COP9 signalosome complex subunit 1;                        | 0.06                                                       | 0.94                              |
| Q9UN52                   | COP9 signalosome complex subunit 3;                        | -0.33                                                      | 0.84                              |

Table S4

| Uniprot accession | Name                                                     | Averaged fold-change (log <sub>2</sub> ) of ASAPratio | Combined ASPAratio p-value |
|-------------------|----------------------------------------------------------|-------------------------------------------------------|----------------------------|
| Q9BT78            | COP9 signalosome complex subunit 4;                      | -0.44                                                 | 0.82                       |
| Q92905            | COP9 signalosome complex subunit 5;                      | -0.51                                                 | 0.72                       |
| P36551            | Coproporphyrinogen-III oxidase, mitochondrial;           | -1.50                                                 | 0.62                       |
| O75367            | Core histone macro-H2A.1;                                | -0.03                                                 | 0.40                       |
| P31146            | Coronin-1A;                                              | -0.41                                                 | 0.86                       |
| Q9ULV4            | Coronin-1C;                                              | 0.12                                                  | 0.99                       |
| P12277            | Creatine kinase B-type;                                  | 3.29                                                  | 0.11                       |
| P46109            | Crk-like protein;                                        | -0.07                                                 | 0.85                       |
| Q13620            | Cullin-4B;                                               | 0.53                                                  | 0.67                       |
| Q86VP6            | Cullin-associated NEDD8-dissociated protein 1;           | -0.59                                                 | 0.80                       |
| P04080            | Cystatin-B;                                              | 0.41                                                  | 0.82                       |
| P01034            | Cystatin-C;                                              | 1.90                                                  | 0.00                       |
| Q9UHD1            | Cysteine and histidine-rich domain-containing protein 1; | 0.00                                                  | 0.53                       |
| P49589            | Cysteine--tRNA ligase, cytoplasmic;                      | -0.22                                                 | 0.89                       |
| Q9NZV1            | Cysteine-rich motor neuron 1 protein;                    | 0.04                                                  | 0.84                       |
| Q9P0S2            | Cytochrome c oxidase assembly protein COX16              | 0.63                                                  | 0.69                       |
| P14854            | Cytochrome c oxidase subunit 6B1;                        | 0.56                                                  | 0.01                       |
| Q14204            | Cytoplasmic dynein 1 heavy chain 1;                      | 0.41                                                  | 0.93                       |
| Q14008            | Cytoskeleton-associated protein 5;                       | -0.54                                                 | 0.72                       |
| P28838            | Cytosol aminopeptidase;                                  | -1.91                                                 | 0.05                       |
| O00154            | Cytosolic acyl coenzyme A thioester hydrolase;           | -0.56                                                 | 0.75                       |
| Q96KP4            | Cytosolic non-specific dipeptidase;                      | -0.60                                                 | 0.86                       |
| O43175            | D-3-phosphoglycerate dehydrogenase;                      | -0.17                                                 | 0.70                       |
| P30046            | D-dopachrome decarboxylase;                              | 0.31                                                  | 0.88                       |
| Q8N163            | DBIRD complex subunit KIAA1967;                          | 0.20                                                  | 0.00                       |
| Q9H773            | dCTP pyrophosphatase 1;                                  | -1.03                                                 | 0.42                       |
| O00115            | Deoxyribonuclease-2-alpha;                               | 0.61                                                  | 0.67                       |
| P33316            | Deoxyuridine 5'-triphosphate nucleotidohydrolase,        | -0.17                                                 | 0.96                       |
| Q14126            | Desmoglein-2;                                            | 0.16                                                  | 0.70                       |
| P60981            | Dextrin;                                                 | -0.71                                                 | 0.64                       |
| Q9NR28            | Diablo homolog, mitochondrial;                           | -0.82                                                 | 0.35                       |
| O94907            | Dickkopf-related protein 1;                              | 2.13                                                  | 0.01                       |
| Q9UBP4            | Dickkopf-related protein 3;                              | 1.39                                                  | 0.07                       |
| P09622            | Dihydrolipoyl dehydrogenase, mitochondrial;              | -0.23                                                 | 0.65                       |
| P09417            | Dihydropteridine reductase;                              | -1.36                                                 | 0.13                       |
| Q16555            | Dihydropyrimidinase-related protein 2;                   | -0.51                                                 | 0.83                       |
| P53634            | Dipeptidyl peptidase 1;                                  | 2.16                                                  | 0.00                       |
| Q9UHL4            | Dipeptidyl peptidase 2;                                  | 1.23                                                  | 0.14                       |
| Q9NY33            | Dipeptidyl peptidase 3;                                  | -0.01                                                 | 0.91                       |
| O14672            | Disintegrin and metalloproteinase domain-containing      | 0.61                                                  | 0.73                       |
| Q13444            | Disintegrin and metalloproteinase domain-containing      | 0.97                                                  | 0.46                       |
| Q16531            | DNA damage-binding protein 1;                            | -0.32                                                 | 0.91                       |
| P18887            | DNA repair protein XRCC1;                                | -0.79                                                 | 0.07                       |
| P49736            | DNA replication licensing factor MCM2;                   | 0.23                                                  | 0.95                       |
| P25205            | DNA replication licensing factor MCM3;                   | 0.48                                                  | 0.92                       |
| Q14566            | DNA replication licensing factor MCM6;                   | 0.51                                                  | 0.87                       |

Table S4

| Uniprot accession | Name                                                  | Averaged fold-change (log <sub>2</sub> ) of ASAPratio | Combined ASPAratio p-value |
|-------------------|-------------------------------------------------------|-------------------------------------------------------|----------------------------|
| P27695            | DNA-(apurinic or apyrimidinic site) lyase;            | 0.59                                                  | 0.65                       |
| O75937            | DnaJ homolog subfamily C member 8;                    | -0.18                                                 | 0.98                       |
| Q16643            | Drebrin;                                              | 2.07                                                  | 0.00                       |
| P51452            | Dual specificity protein phosphatase 3;               | -0.18                                                 | 0.92                       |
| Q13561            | Dynactin subunit 2;                                   | 0.36                                                  | 0.93                       |
| Q96FJ2            | Dynein light chain 2, cytoplasmic;                    | -0.48                                                 | 0.77                       |
| Q14118            | Dystroglycan;                                         | 0.93                                                  | 0.44                       |
| Q9Y4X5            | E3 ubiquitin-protein ligase ARIH1;                    | -0.73                                                 | 0.57                       |
| Q9UNE7            | E3 ubiquitin-protein ligase CHIP;                     | 0.29                                                  | 0.96                       |
| Q14258            | E3 ubiquitin/ISG15 ligase TRIM25;                     | -0.50                                                 | 0.73                       |
| Q15075            | Early endosome antigen 1;                             | 1.85                                                  | 0.04                       |
| Q96C19            | EF-hand domain-containing protein D2;                 | 0.84                                                  | 0.51                       |
| Q9H4M9            | EH domain-containing protein 1;                       | -0.07                                                 | 0.88                       |
| Q15717            | ELAV-like protein 1;                                  | 0.27                                                  | 0.69                       |
| P68104            | Elongation factor 1-alpha 1;                          | -0.36                                                 | 0.93                       |
| Q05639            | Elongation factor 1-alpha 2;                          | 2.83                                                  | 0.00                       |
| P24534            | Elongation factor 1-beta;                             | -0.05                                                 | 0.99                       |
| P29692            | Elongation factor 1-delta;                            | -0.72                                                 | 0.66                       |
| P26641            | Elongation factor 1-gamma;                            | -0.50                                                 | 0.91                       |
| P13639            | Elongation factor 2;                                  | -0.40                                                 | 0.89                       |
| P50402            | Emerin;                                               | -1.51                                                 | 0.06                       |
| Q99961            | Endophilin-A2;                                        | 0.64                                                  | 0.72                       |
| P30040            | Endoplasmic reticulum resident protein 29;            | 1.13                                                  | 0.28                       |
| Q9BS26            | Endoplasmic reticulum resident protein 44;            | 0.28                                                  | 0.97                       |
| P14625            | Endoplasmin;                                          | 1.49                                                  | 0.10                       |
| Q9UNN8            | Endothelial protein C receptor;                       | 0.21                                                  | 0.50                       |
| P84090            | Enhancer of rudimentary homolog;                      | -0.61                                                 | 0.56                       |
| P42126            | Enoyl-CoA delta isomerase 1, mitochondrial;           | 0.87                                                  | 0.03                       |
| P30084            | Enoyl-CoA hydratase, mitochondrial;                   | 1.17                                                  | 0.03                       |
| P20827            | Ephrin-A1;                                            | 0.20                                                  | 0.63                       |
| P00533            | Epidermal growth factor receptor;                     | -0.41                                                 | 0.90                       |
| P61916            | Epididymal secretory protein E1;                      | 1.14                                                  | 0.22                       |
| Q9Y2E5            | Epididymis-specific alpha-mannosidase;                | 0.30                                                  | 0.47                       |
| Q96HE7            | ERO1-like protein alpha;                              | 0.00                                                  | 0.65                       |
| P60842            | Eukaryotic initiation factor 4A-I;                    | 0.86                                                  | 0.38                       |
| Q14240            | Eukaryotic initiation factor 4A-II;                   | -0.63                                                 | 0.54                       |
| P38919            | Eukaryotic initiation factor 4A-III;                  | 0.83                                                  | 0.14                       |
| P15170            | Eukaryotic peptide chain release factor GTP-binding   | -0.41                                                 | 0.92                       |
| P62495            | Eukaryotic peptide chain release factor subunit 1;    | -0.02                                                 | 0.84                       |
| O14602            | Eukaryotic translation initiation factor 1A, Y-       | -0.45                                                 | 0.88                       |
| P05198            | Eukaryotic translation initiation factor 2 subunit 1; | 0.34                                                  | 0.96                       |
| P20042            | Eukaryotic translation initiation factor 2 subunit 2; | 1.07                                                  | 0.02                       |
| P41091            | Eukaryotic translation initiation factor 2 subunit 3; | -0.10                                                 | 0.96                       |
| Q9BY44            | Eukaryotic translation initiation factor 2A;          | -1.05                                                 | 0.39                       |
| Q14152            | Eukaryotic translation initiation factor 3 subunit A; | 0.18                                                  | 0.95                       |
| P55884            | Eukaryotic translation initiation factor 3 subunit B; | 0.25                                                  | 0.96                       |
| Q99613            | Eukaryotic translation initiation factor 3 subunit C; | -0.29                                                 | 0.63                       |

Table S4

| Uniprot accession | Name                                                  | Averaged fold-change (log <sub>2</sub> ) of ASAPratio | Combined ASPAratio p-value |
|-------------------|-------------------------------------------------------|-------------------------------------------------------|----------------------------|
| O15371            | Eukaryotic translation initiation factor 3 subunit D; | -0.24                                                 | 0.98                       |
| P60228            | Eukaryotic translation initiation factor 3 subunit E; | 0.05                                                  | 0.86                       |
| O75821            | Eukaryotic translation initiation factor 3 subunit G; | 0.41                                                  | 0.91                       |
| Q13347            | Eukaryotic translation initiation factor 3 subunit I; | 0.13                                                  | 0.97                       |
| O75822            | Eukaryotic translation initiation factor 3 subunit J; | -0.29                                                 | 0.93                       |
| Q9UBQ5            | Eukaryotic translation initiation factor 3 subunit K; | -0.85                                                 | 0.07                       |
| Q9Y262            | Eukaryotic translation initiation factor 3 subunit L; | -0.44                                                 | 0.85                       |
| Q04637            | Eukaryotic translation initiation factor 4 gamma 1;   | 0.13                                                  | 0.98                       |
| P23588            | Eukaryotic translation initiation factor 4B;          | 0.30                                                  | 0.79                       |
| P63241            | Eukaryotic translation initiation factor 5A-1;        | -0.08                                                 | 1.00                       |
| Q15024            | Exosome complex component RRP42;                      | 0.25                                                  | 0.96                       |
| O14980            | Exportin-1                                            | -0.74                                                 | 0.72                       |
| P55060            | Exportin-2;                                           | -0.19                                                 | 0.96                       |
| Q16610            | Extracellular matrix protein 1;                       | 1.21                                                  | 0.23                       |
| Q8IWU5            | Extracellular sulfatase Sulf-2;                       | 0.35                                                  | 0.93                       |
| P15311            | Ezrin;                                                | -0.87                                                 | 0.43                       |
| P52907            | F-actin-capping protein subunit alpha-1;              | -0.29                                                 | 0.92                       |
| P47755            | F-actin-capping protein subunit alpha-2;              | -0.36                                                 | 0.90                       |
| P47756            | F-actin-capping protein subunit beta;                 | -0.11                                                 | 0.95                       |
| Q9Y5B9            | FACT complex subunit SPT16;                           | 1.11                                                  | 0.15                       |
| Q08945            | FACT complex subunit SSRP1;                           | 0.60                                                  | 0.81                       |
| Q96AE4            | Far upstream element-binding protein 1;               | -0.22                                                 | 0.94                       |
| Q92945            | Far upstream element-binding protein 2;               | -0.42                                                 | 0.91                       |
| P14324            | Farnesyl pyrophosphate synthase;                      | 0.24                                                  | 0.88                       |
| P49327            | Fatty acid synthase;                                  | 0.48                                                  | 0.89                       |
| Q01469            | Fatty acid-binding protein, epidermal;                | -0.66                                                 | 0.83                       |
| Q96AC1            | Fermitin family homolog 2;                            | 0.68                                                  | 0.68                       |
| P02794            | Ferritin heavy chain;                                 | -0.96                                                 | 0.44                       |
| Q14512            | Fibroblast growth factor-binding protein 1;           | -0.31                                                 | 0.82                       |
| P02751            | Fibronectin;                                          | -0.71                                                 | 0.57                       |
| P21333            | Filamin-A;                                            | 0.38                                                  | 0.94                       |
| O75369            | Filamin-B;                                            | 0.41                                                  | 0.92                       |
| Q14315            | Filamin-C;                                            | -0.33                                                 | 0.85                       |
| P30043            | Flavin reductase (NADPH);                             | 0.55                                                  | 0.19                       |
| O95633            | Follistatin-related protein 3;                        | -0.31                                                 | 0.87                       |
| P04075            | Fructose-bisphosphate aldolase A;                     | -0.66                                                 | 0.73                       |
| P09972            | Fructose-bisphosphate aldolase C;                     | -0.32                                                 | 0.91                       |
| P07954            | Fumarate hydratase, mitochondrial;                    | 0.65                                                  | 0.73                       |
| P09382            | Galectin-1;                                           | -0.73                                                 | 0.64                       |
| Q08380            | Galectin-3-binding protein;                           | 1.59                                                  | 0.06                       |
| P17931            | Galectin-3;                                           | -0.14                                                 | 0.97                       |
| Q92820            | Gamma-glutamyl hydrolase;                             | 0.52                                                  | 0.71                       |
| O75223            | Gamma-glutamylcyclotransferase;                       | 0.14                                                  | 0.98                       |



Table S4

| Uniprot accession | Name                                                      | Averaged fold-change (log <sub>2</sub> ) of ASAPratio | Combined ASPAratio p-value |
|-------------------|-----------------------------------------------------------|-------------------------------------------------------|----------------------------|
| P13284            | Gamma-interferon-inducible lysosomal thiol reductase;     | 0.70                                                  | 0.28                       |
| P17900            | Ganglioside GM2 activator;                                | -0.42                                                 | 0.80                       |
| P06396            | Gelsolin;                                                 | 0.57                                                  | 0.78                       |
| P78347            | General transcription factor II-I;                        | 0.66                                                  | 0.68                       |
| P35269            | General transcription factor IIF subunit 1;               | -0.66                                                 | 0.62                       |
| P60983            | Glia maturation factor beta;                              | -0.05                                                 | 1.00                       |
| P07093            | Glia-derived nexin;                                       | 1.14                                                  | 0.40                       |
| Q96EK6            | Glucosamine 6-phosphate N-acetyltransferase;              | -0.59                                                 | 0.76                       |
| P06744            | Glucose-6-phosphate isomerase;                            | -0.11                                                 | 0.99                       |
| P14314            | Glucosidase 2 subunit beta;                               | -1.18                                                 | 0.01                       |
| P04062            | Glucosylceramidase;                                       | 0.41                                                  | 0.88                       |
| P00367            | Glutamate dehydrogenase 1, mitochondrial;                 | 1.34                                                  | 0.20                       |
| P48507            | Glutamate--cysteine ligase regulatory subunit;            | -0.45                                                 | 0.66                       |
| P47897            | Glutamine--tRNA ligase;                                   | -0.33                                                 | 0.88                       |
| O76003            | Glutaredoxin-3;                                           | 0.61                                                  | 0.79                       |
| Q86SX6            | Glutaredoxin-related protein 5, mitochondrial;            | 0.44                                                  | 0.77                       |
| P78417            | Glutathione S-transferase omega-1;                        | 0.35                                                  | 0.91                       |
| P09211            | Glutathione S-transferase P;                              | -0.67                                                 | 0.88                       |
| P04406            | Glyceraldehyde-3-phosphate dehydrogenase;                 | -0.72                                                 | 0.66                       |
| P11216            | Glycogen phosphorylase, brain form;                       | -1.68                                                 | 0.24                       |
| P06737            | Glycogen phosphorylase, liver form;                       | 0.07                                                  | 0.98                       |
| Q9HC38            | Glyoxalase domain-containing protein 4;                   | 0.21                                                  | 0.92                       |
| P35052            | Glypican-1;                                               | 0.84                                                  | 0.64                       |
| P49915            | GMP synthase [glutamine-hydrolyzing];                     | -0.12                                                 | 0.94                       |
| Q8NBJ4            | Golgi membrane protein 1;                                 | 0.08                                                  | 0.59                       |
| P28799            | Granulins;                                                | -0.28                                                 | 0.11                       |
| Q8NCC3            | Group XV phospholipase A2;                                | 0.32                                                  | 0.74                       |
| P62993            | Growth factor receptor-bound protein 2;                   | -0.21                                                 | 0.97                       |
| P09341            | Growth-regulated alpha protein;                           | 2.45                                                  | 0.00                       |
| Q99988            | Growth/differentiation factor 15;                         | 0.64                                                  | 0.48                       |
| Q9HAV7            | GrpE protein homolog 1, mitochondrial;                    | -0.31                                                 | 0.12                       |
| P62826            | GTP-binding nuclear protein Ran;                          | -0.43                                                 | 0.84                       |
| Q9Y2T3            | Guanine deaminase;                                        | -0.48                                                 | 0.84                       |
| P62879            | Guanine nucleotide-binding protein G(I)/G(S)/G(T)         | 0.61                                                  | 0.53                       |
| P63244            | Guanine nucleotide-binding protein subunit beta-2-like 1; | -0.21                                                 | 0.98                       |
| O60832            | H/ACA ribonucleoprotein complex subunit 4;                | -0.04                                                 | 0.60                       |
| P48723            | Heat shock 70 kDa protein 13;                             | 1.00                                                  | 0.27                       |
| P08107            | Heat shock 70 kDa protein 1A/1B;                          | -0.19                                                 | 0.96                       |
| P34932            | Heat shock 70 kDa protein 4;                              | -0.58                                                 | 0.86                       |
| P11142            | Heat shock cognate 71 kDa protein;                        | -0.30                                                 | 0.86                       |
| Q92598            | Heat shock protein 105 kDa;                               | 0.27                                                  | 0.91                       |
| P04792            | Heat shock protein beta-1;                                | 0.31                                                  | 0.91                       |
| P07900            | Heat shock protein HSP 90-alpha;                          | -0.46                                                 | 0.86                       |

Table S4

| Uniprot accession | Name                                                                                                          | Averaged fold-change (log <sub>2</sub> ) of ASAPratio | Combined ASPRatio p-value |
|-------------------|---------------------------------------------------------------------------------------------------------------|-------------------------------------------------------|---------------------------|
| P08238            | Heat shock protein HSP 90-beta;                                                                               | -0.07                                                 | 1.00                      |
| P69905            | Hemoglobin subunit alpha;                                                                                     | 0.41                                                  | 0.85                      |
| P02042            | Hemoglobin subunit delta;                                                                                     | 0.04                                                  | 0.66                      |
| Q7Z4V5            | Hepatoma-derived growth factor-related protein 2;                                                             | -0.34                                                 | 0.90                      |
| P51858            | Hepatoma-derived growth factor;                                                                               | -0.38                                                 | 0.95                      |
| Q99729            | Heterogeneous nuclear ribonucleoprotein A/B;                                                                  | 0.03                                                  | 0.93                      |
| Q13151            | Heterogeneous nuclear ribonucleoprotein A0;                                                                   | -0.39                                                 | 0.02                      |
| P09651            | Heterogeneous nuclear ribonucleoprotein A1;                                                                   | 0.43                                                  | 0.84                      |
| Q14103            | Heterogeneous nuclear ribonucleoprotein D0;                                                                   | -0.14                                                 | 0.80                      |
| P52597            | Heterogeneous nuclear ribonucleoprotein F;                                                                    | -0.31                                                 | 0.95                      |
| P31943            | Heterogeneous nuclear ribonucleoprotein H;                                                                    | 0.36                                                  | 0.93                      |
| P31942            | Heterogeneous nuclear ribonucleoprotein H3;                                                                   | 0.70                                                  | 0.46                      |
| P61978            | Heterogeneous nuclear ribonucleoprotein K;                                                                    | 0.61                                                  | 0.77                      |
| P52272            | Heterogeneous nuclear ribonucleoprotein M;                                                                    | 0.89                                                  | 0.36                      |
| O60506            | Heterogeneous nuclear ribonucleoprotein Q;                                                                    | 0.78                                                  | 0.56                      |
| O43390            | Heterogeneous nuclear ribonucleoprotein R;                                                                    | 0.26                                                  | 0.73                      |
| Q00839            | Heterogeneous nuclear ribonucleoprotein U;                                                                    | 0.83                                                  | 0.29                      |
| P22626            | Heterogeneous nuclear ribonucleoproteins A2/B1;                                                               | 0.86                                                  | 0.48                      |
| P07910            | Heterogeneous nuclear ribonucleoproteins C1/C2;                                                               | 0.88                                                  | 0.03                      |
| P09429            | High mobility group protein B1;                                                                               | -0.57                                                 | 0.62                      |
| P26583            | High mobility group protein B2;                                                                               | -0.44                                                 | 0.70                      |
| P37235            | Hippocalcin-like protein 1;                                                                                   | -0.38                                                 | 0.95                      |
| Q9BX68            | Histidine triad nucleotide-binding protein 2,                                                                 | 0.59                                                  | 0.55                      |
| P12081            | Histidine--tRNA ligase, cytoplasmic;                                                                          | -0.07                                                 | 0.93                      |
| P10412            | Histone H1.4;                                                                                                 | -0.04                                                 | 0.88                      |
| Q92522            | Histone H1x;                                                                                                  | -0.78                                                 | 0.04                      |
| P04908            | Histone H2A type 1-B/E;                                                                                       | -0.85                                                 | 0.21                      |
| P0C0S5            | Histone H2A.Z;                                                                                                | 0.51                                                  | 0.18                      |
| O60814            | Histone H2B type 1-K;                                                                                         | -1.06                                                 | 0.40                      |
| P68431            | Histone H3.1;                                                                                                 | -0.64                                                 | 0.72                      |
| P62805            | Histone H4;                                                                                                   | -1.20                                                 | 0.13                      |
| Q09028            | Histone-binding protein RBBP4;                                                                                | -0.39                                                 | 0.89                      |
| P01892            | HLA class I histocompatibility antigen, A-2 alpha chain;                                                      | 0.65                                                  | 0.71                      |
| P10321            | HLA class I histocompatibility antigen, Cw-7 alpha chain;                                                     | 1.73                                                  | 0.08                      |
| P51610            | Host cell factor 1;                                                                                           | 0.06                                                  | 0.73                      |
| P50502            | Hsc70-interacting protein;                                                                                    | -0.27                                                 | 0.96                      |
| Q16543            | Hsp90 co-chaperone Cdc37;                                                                                     | -0.37                                                 | 0.91                      |
| P60953            | <a href="http://www.extend-partition.com/free-partition-">http://www.extend-partition.com/free-partition-</a> | -0.77                                                 | 0.26                      |
| Q01581            | Hydroxymethylglutaryl-CoA synthase, cytoplasmic;                                                              | 1.75                                                  | 0.00                      |
| P00492            | Hypoxanthine-guanine phosphoribosyltransferase;                                                               | -0.14                                                 | 0.98                      |
| Q9Y4L1            | Hypoxia up-regulated protein 1;                                                                               | -0.09                                                 | 0.80                      |
| Q969P0            | Immunoglobulin superfamily member 8;                                                                          | -1.60                                                 | 0.08                      |
| O00505            | Importin subunit alpha-3;                                                                                     | 0.36                                                  | 0.75                      |
| Q14974            | Importin subunit beta-1;                                                                                      | -0.13                                                 | 0.99                      |
| O00410            | Importin-5;                                                                                                   | -0.23                                                 | 0.99                      |
| Q13308            | Inactive tyrosine-protein kinase 7;                                                                           | -0.57                                                 | 0.76                      |
| Q15181            | Inorganic pyrophosphatase;                                                                                    | 0.06                                                  | 0.99                      |

Table S4

| Uniprot accession | Name                                                      | Averaged fold-change (log <sub>2</sub> ) of ASAPratio | Combined ASPAratio p-value |
|-------------------|-----------------------------------------------------------|-------------------------------------------------------|----------------------------|
| P12268            | Inosine-5'-monophosphate dehydrogenase 2;                 | 0.63                                                  | 0.78                       |
| P29218            | Inositol monophosphatase 1;                               | -0.16                                                 | 0.99                       |
| Q9NPH2            | Inositol-3-phosphate synthase 1;                          | 0.41                                                  | 0.89                       |
| P14735            | Insulin-degrading enzyme;                                 | -0.53                                                 | 0.51                       |
| P01344            | Insulin-like growth factor II;                            | 0.57                                                  | 0.50                       |
| P18065            | Insulin-like growth factor-binding protein 2;             | 1.35                                                  | 0.10                       |
| P17936            | Insulin-like growth factor-binding protein 3;             | 2.70                                                  | 0.00                       |
| P24592            | Insulin-like growth factor-binding protein 6;             | 3.08                                                  | 0.00                       |
| P23229            | Integrin alpha-6;                                         | 1.26                                                  | 0.23                       |
| P05556            | Integrin beta-1;                                          | -0.43                                                 | 0.83                       |
| P16144            | Integrin beta-4;                                          | -0.08                                                 | 1.00                       |
| O95965            | Integrin beta-like protein 1;                             | -0.56                                                 | 0.81                       |
| Q9H0C8            | Integrin-linked kinase-associated serine/threonine        | 0.10                                                  | 0.98                       |
| Q12905            | Interleukin enhancer-binding factor 2;                    | 0.18                                                  | 0.55                       |
| Q12906            | Interleukin enhancer-binding factor 3;                    | 0.02                                                  | 0.96                       |
| O75874            | Isocitrate dehydrogenase [NADP] cytoplasmic;              | -0.47                                                 | 0.90                       |
| P41252            | Isoleucine--tRNA ligase, cytoplasmic;                     | 0.41                                                  | 0.88                       |
| P05783            | Keratin, type I cytoskeletal 18;                          | 0.26                                                  | 0.82                       |
| P08727            | Keratin, type I cytoskeletal 19;                          | 3.14                                                  | 0.00                       |
| P05787            | Keratin, type II cytoskeletal 8;                          | 0.42                                                  | 0.80                       |
| Q07666            | KH domain-containing, RNA-binding, signal                 | -0.12                                                 | 0.80                       |
| Q86UP2            | Kinectin;                                                 | 0.00                                                  | 0.98                       |
| Q07866            | Kinesin light chain 1;                                    | 1.18                                                  | 0.59                       |
| P33176            | Kinesin-1 heavy chain;                                    | -0.36                                                 | 0.88                       |
| Q9NRN7            | L-aminoadipate-semialdehyde dehydrogenase-                | -0.28                                                 | 0.97                       |
| P00338            | L-lactate dehydrogenase A chain;                          | -1.06                                                 | 0.35                       |
| P20700            | Lamin-B1;                                                 | 0.13                                                  | 0.91                       |
| Q03252            | Lamin-B2;                                                 | -0.06                                                 | 0.92                       |
| P42167            | Lamina-associated polypeptide 2, isoforms beta/gamma;     | 0.46                                                  | 0.78                       |
| O15230            | Laminin subunit alpha-5;                                  | 1.11                                                  | 0.43                       |
| P07942            | Laminin subunit beta-1;                                   | 1.13                                                  | 0.17                       |
| P55268            | Laminin subunit beta-2;                                   | 2.70                                                  | 0.00                       |
| P11047            | Laminin subunit gamma-1;                                  | 0.88                                                  | 0.47                       |
| Q13753            | Laminin subunit gamma-2;                                  | 1.19                                                  | 0.25                       |
| Q9NS15            | Latent-transforming growth factor beta-binding protein 3; | 1.75                                                  | 0.10                       |
| Q8N2S1            | Latent-transforming growth factor beta-binding protein 4; | -0.01                                                 | 0.77                       |
| Q99538            | Legumain;                                                 | 1.30                                                  | 0.13                       |
| Q8N1G4            | Leucine-rich repeat-containing protein 47;                | -0.44                                                 | 0.87                       |
| Q96AG4            | Leucine-rich repeat-containing protein 59;                | -0.07                                                 | 0.88                       |
| P09960            | Leukotriene A-4 hydrolase;                                | 0.08                                                  | 1.00                       |
| P24666            | Low molecular weight phosphotyrosine protein              | -0.68                                                 | 0.27                       |
| P01130            | Low-density lipoprotein receptor;                         | -0.17                                                 | 0.91                       |

Table S4

| Uniprot accession | Name                                                  | Averaged fold-change (log <sub>2</sub> ) of ASAPratio | Combined ASPAratio p-value |
|-------------------|-------------------------------------------------------|-------------------------------------------------------|----------------------------|
| P05455            | Lupus La protein;                                     | 0.02                                                  | 0.98                       |
| Q15046            | Lysine--tRNA ligase;                                  | -0.11                                                 | 0.96                       |
| P10253            | Lysosomal alpha-glucosidase;                          | 0.50                                                  | 0.59                       |
| O00754            | Lysosomal alpha-mannosidase;                          | 1.23                                                  | 0.26                       |
| P42785            | Lysosomal Pro-X carboxypeptidase;                     | 0.71                                                  | 0.75                       |
| P10619            | Lysosomal protective protein;                         | 0.71                                                  | 0.63                       |
| Q9UMR5            | Lysosomal thioesterase PPT2;                          | 1.21                                                  | 0.12                       |
| Q9Y4K0            | Lysyl oxidase homolog 2;                              | 0.39                                                  | 0.78                       |
| Q96JB6            | Lysyl oxidase homolog 4;                              | -0.57                                                 | 0.70                       |
| Q96C86            | m7GpppX diphosphatase;                                | -0.90                                                 | 0.60                       |
| P09603            | Macrophage colony-stimulating factor 1;               | 1.59                                                  | 0.03                       |
| P40121            | Macrophage-capping protein;                           | 0.41                                                  | 0.86                       |
| Q14764            | Major vault protein;                                  | -0.47                                                 | 0.60                       |
| P40925            | Malate dehydrogenase, cytoplasmic;                    | -0.71                                                 | 0.62                       |
| P40926            | Malate dehydrogenase, mitochondrial;                  | -0.20                                                 | 0.94                       |
| Q9ULC4            | Malignant T-cell-amplified sequence 1;                | -0.86                                                 | 0.35                       |
| P33908            | Mannosyl-oligosaccharide 1,2-alpha-mannosidase IA;    | -2.37                                                 | 0.00                       |
| P43243            | Matrin-3;                                             | 0.69                                                  | 0.25                       |
| Q99542            | Matrix metalloproteinase-19;                          | 1.65                                                  | 0.02                       |
| Q5JRA6            | Melanoma inhibitory activity protein 3;               | 1.45                                                  | 0.05                       |
| Q13421            | Mesothelin;                                           | 1.27                                                  | 0.15                       |
| P01033            | Metalloproteinase inhibitor 1;                        | 1.25                                                  | 0.25                       |
| P16035            | Metalloproteinase inhibitor 2;                        | 0.43                                                  | 0.42                       |
| Q13330            | Metastasis-associated protein MTA1;                   | 0.37                                                  | 0.66                       |
| O94776            | Metastasis-associated protein MTA2;                   | -0.35                                                 | 0.66                       |
| Q96PK2            | Microtubule-actin cross-linking factor 1, isoforms    | -0.19                                                 | 0.95                       |
| Q9UPN3            | Microtubule-actin cross-linking factor 1, isoforms    | 0.28                                                  | 0.07                       |
| P27816            | Microtubule-associated protein 4;                     | -0.49                                                 | 0.72                       |
| Q15691            | Microtubule-associated protein RP/EB family member 1; | -0.44                                                 | 0.93                       |
| P21741            | Midkine;                                              | 0.41                                                  | 0.50                       |
| Q16891            | Mitochondrial inner membrane protein;                 | 0.49                                                  | 0.93                       |
| O43684            | Mitotic checkpoint protein BUB3;                      | -0.24                                                 | 0.91                       |
| P26038            | Moesin;                                               | 2.83                                                  | 0.04                       |
| P53985            | Monocarboxylate transporter 1;                        | 1.79                                                  | 0.01                       |
| P98088            | Mucin-5AC;                                            | -0.95                                                 | 0.87                       |
| P22234            | Multifunctional protein ADE2;                         | 0.98                                                  | 0.40                       |
| Q9UNW1            | Multiple inositol polyphosphate phosphatase 1;        | 1.79                                                  | 0.08                       |
| Q9NZM1            | Myoferlin;                                            | 0.20                                                  | 0.77                       |
| P60660            | Myosin light polypeptide 6;                           | -0.29                                                 | 0.95                       |
| Q6WCQ1            | Myosin phosphatase Rho-interacting protein;           | 0.04                                                  | 0.37                       |
| O14950            | Myosin regulatory light chain 12B;                    | -0.09                                                 | 1.00                       |
| P35579            | Myosin-9;                                             | -0.37                                                 | 0.90                       |
| P58546            | Myotrophin;                                           | -0.45                                                 | 0.77                       |
| P29966            | Myristoylated alanine-rich C-kinase substrate;        | -6.49                                                 | 0.00                       |

Table S4

| Uniprot accession | Name                                                  | Averaged fold-change (log <sub>2</sub> ) of ASAPratio | Combined ASPAratio p-value |
|-------------------|-------------------------------------------------------|-------------------------------------------------------|----------------------------|
| P34059            | N-acetylgalactosamine-6-sulfatase;                    | 0.96                                                  | 0.51                       |
| P15586            | N-acetylglucosamine-6-sulfatase;                      | 0.18                                                  | 0.87                       |
| O43505            | N-acetyllactosaminide beta-1,3-N-                     | 0.75                                                  | 0.59                       |
| Q14CX7            | N-alpha-acetyltransferase 25, NatB auxiliary subunit; | -0.82                                                 | 0.19                       |
| O95777            | N-alpha-acetyltransferase 38, NatC auxiliary subunit; | -0.82                                                 | 0.43                       |
| Q9GZZ1            | N-alpha-acetyltransferase 50;                         | 0.27                                                  | 0.87                       |
| O95865            | N(G),N(G)-dimethylarginine dimethylaminohydrolase 2;  | 0.51                                                  | 0.36                       |
| O14745            | Na(+)/H(+) exchange regulatory cofactor NHE-RF1;      | -0.33                                                 | 0.92                       |
| P15559            | NAD(P)H dehydrogenase [quinone] 1;                    | 0.01                                                  | 0.97                       |
| Q8NCW5            | NAD(P)H-hydrate epimerase;                            | -0.40                                                 | 0.74                       |
| O43847            | Nardilysin;                                           | 0.42                                                  | 0.91                       |
| Q13765            | Nascent polypeptide-associated complex subunit alpha; | -0.24                                                 | 0.76                       |
| Q92859            | Neogenin;                                             | -2.00                                                 | 0.15                       |
| Q9UMX5            | Neudesin;                                             | 0.68                                                  | 0.74                       |
| P32004            | Neural cell adhesion molecule L1;                     | 2.01                                                  | 0.01                       |
| Q09666            | Neuroblast differentiation-associated protein AHNAK;  | 0.60                                                  | 0.80                       |
| Q9BYT8            | Neurolysin, mitochondrial;                            | 0.09                                                  | 0.57                       |
| O14786            | Neuropilin-1;                                         | -1.80                                                 | 0.17                       |
| O15240            | Neurosecretory protein VGF;                           | -0.39                                                 | 0.68                       |
| Q14697            | Neutral alpha-glucosidase AB;                         | 0.74                                                  | 0.69                       |
| P55769            | NHP2-like protein 1;                                  | 0.47                                                  | 0.70                       |
| P43490            | Nicotinamide phosphoribosyltransferase;               | -0.53                                                 | 0.77                       |
| Q9Y314            | Nitric oxide synthase-interacting protein;            | 0.49                                                  | 0.31                       |
| Q9UNZ2            | NSFL1 cofactor p47;                                   | -0.93                                                 | 0.66                       |
| P49321            | Nuclear autoantigenic sperm protein;                  | -0.45                                                 | 0.94                       |
| Q9Y266            | Nuclear migration protein nudC;                       | -0.22                                                 | 0.95                       |
| Q14980            | Nuclear mitotic apparatus protein 1;                  | -0.27                                                 | 0.95                       |
| P61970            | Nuclear transport factor 2;                           | -0.21                                                 | 0.79                       |
| P67809            | Nuclease-sensitive element-binding protein 1;         | 0.45                                                  | 0.83                       |
| Q02818            | Nucleobindin-1;                                       | 0.86                                                  | 0.40                       |
| Q14978            | Nucleolar and coiled-body phosphoprotein 1;           | -0.06                                                 | 0.02                       |
| Q9NR30            | Nucleolar RNA helicase 2;                             | 1.49                                                  | 0.32                       |
| P19338            | Nucleolin;                                            | 0.53                                                  | 0.79                       |
| P06748            | Nucleophosmin;                                        | 0.32                                                  | 0.69                       |
| P12270            | Nucleoprotein TPR;                                    | 0.89                                                  | 0.35                       |
| P15531            | Nucleoside diphosphate kinase A;                      | 0.29                                                  | 0.94                       |
| P55209            | Nucleosome assembly protein 1-like 1;                 | 0.54                                                  | 0.84                       |
| Q99733            | Nucleosome assembly protein 1-like 4;                 | -0.43                                                 | 0.86                       |
| Q9NTK5            | Obg-like ATPase 1;                                    | -0.62                                                 | 0.90                       |
| Q92882            | Osteoclast-stimulating factor 1;                      | -2.36                                                 | 0.00                       |
| Q86UD1            | Out at first protein homolog;                         | 0.83                                                  | 0.48                       |
| P50897            | Palmitoyl-protein thioesterase 1;                     | 0.50                                                  | 0.71                       |
| O75475            | PC4 and SFRS1-interacting protein;                    | -0.08                                                 | 0.81                       |
| Q96HC4            | PDZ and LIM domain protein 5;                         | 0.17                                                  | 0.88                       |
| Q9NR12            | PDZ and LIM domain protein 7;                         | -0.19                                                 | 0.81                       |

Table S4

| Uniprot accession | Name                                                        | Averaged fold-change (log <sub>2</sub> ) of ASAPratio | Combined ASPRatio p-value |
|-------------------|-------------------------------------------------------------|-------------------------------------------------------|---------------------------|
| P26022            | Pentraxin-related protein PTX3;                             | 3.38                                                  | 0.00                      |
| P19021            | Peptidyl-glycine alpha-amidating monooxygenase;             | 0.17                                                  | 0.95                      |
| P62937            | Peptidyl-prolyl cis-trans isomerase A;                      | -0.73                                                 | 0.78                      |
| P23284            | Peptidyl-prolyl cis-trans isomerase B;                      | 0.14                                                  | 0.92                      |
| P62942            | Peptidyl-prolyl cis-trans isomerase FKBP1A;                 | 0.14                                                  | 0.80                      |
| Q00688            | Peptidyl-prolyl cis-trans isomerase FKBP3;                  | 1.16                                                  | 0.22                      |
| Q02790            | Peptidyl-prolyl cis-trans isomerase FKBP4;                  | -0.39                                                 | 0.89                      |
| Q9Y3C6            | Peptidyl-prolyl cis-trans isomerase-like 1;                 | -0.09                                                 | 0.68                      |
| O60664            | Perilipin-3;                                                | 0.20                                                  | 0.88                      |
| Q06830            | Peroxiredoxin-1;                                            | -0.45                                                 | 0.86                      |
| P32119            | Peroxiredoxin-2;                                            | -1.32                                                 | 0.14                      |
| P30044            | Peroxiredoxin-5, mitochondrial;                             | 0.05                                                  | 0.99                      |
| P30041            | Peroxiredoxin-6;                                            | 0.52                                                  | 0.65                      |
| Q8WW12            | PEST proteolytic signal-containing nuclear protein;         | -0.37                                                 | 0.44                      |
| Q9NSD9            | Phenylalanine--tRNA ligase beta subunit;                    | 0.03                                                  | 0.99                      |
| P30086            | Phosphatidylethanolamine-binding protein 1;                 | -0.63                                                 | 0.68                      |
| P48739            | Phosphatidylinositol transfer protein beta isoform;         | 0.01                                                  | 0.97                      |
| P00558            | Phosphoglycerate kinase 1;                                  | -0.79                                                 | 0.62                      |
| P18669            | Phosphoglycerate mutase 1;                                  | -0.05                                                 | 0.98                      |
| A6NDG6            | Phosphoglycolate phosphatase;                               | -0.25                                                 | 0.74                      |
| Q6P4A8            | Phospholipase B-like 1;                                     | 1.36                                                  | 0.08                      |
| P55058            | Phospholipid transfer protein;                              | 1.27                                                  | 0.11                      |
| O15067            | Phosphoribosylformylglycinamide synthase;                   | 0.30                                                  | 0.91                      |
| Q9Y617            | Phosphoserine aminotransferase;                             | 1.27                                                  | 0.30                      |
| P78330            | Phosphoserine phosphatase;                                  | -0.44                                                 | 0.93                      |
| P36955            | Pigment epithelium-derived factor;                          | 3.56                                                  | 0.00                      |
| Q9H307            | Pinin;                                                      | 0.40                                                  | 0.55                      |
| Q9GZP4            | PITH domain-containing protein 1;                           | -0.07                                                 | 0.96                      |
| Q9BTY2            | Plasma alpha-L-fucosidase;                                  | 1.47                                                  | 0.04                      |
| P05155            | Plasma protease C1 inhibitor;                               | -0.23                                                 | 0.72                      |
| Q8NC51            | Plasminogen activator inhibitor 1 RNA-binding protein;      | -0.06                                                 | 0.95                      |
| P43034            | Platelet-activating factor acetylhydrolase IB subunit       | 0.37                                                  | 0.72                      |
| P68402            | Platelet-activating factor acetylhydrolase IB subunit beta; | -0.59                                                 | 0.32                      |
| Q15102            | Platelet-activating factor acetylhydrolase IB subunit       | -0.19                                                 | 0.90                      |
| Q15149            | Plectin;                                                    | -0.61                                                 | 0.84                      |
| O15031            | Plexin-B2;                                                  | 0.88                                                  | 0.03                      |
| Q92692            | Poliovirus receptor-related protein 2;                      | 0.55                                                  | 0.86                      |
| P09874            | Poly [ADP-ribose] polymerase 1;                             | -0.06                                                 | 0.92                      |
| Q15365            | Poly(rC)-binding protein 1;                                 | -0.03                                                 | 1.00                      |
| Q15366            | Poly(rC)-binding protein 2;                                 | -0.27                                                 | 0.96                      |
| Q9UHX1            | Poly(U)-binding-splicing factor PUF60;                      | -0.08                                                 | 1.00                      |
| P11940            | Polyadenylate-binding protein 1;                            | 0.86                                                  | 0.44                      |
| Q6NZI2            | Polymerase I and transcript release factor;                 | -0.18                                                 | 0.91                      |
| Q10471            | Polypeptide N-acetylgalactosaminyltransferase 2;            | 0.29                                                  | 0.81                      |
| P26599            | Polypyrimidine tract-binding protein 1;                     | 0.05                                                  | 0.54                      |

Table S4

| Uniprot accession | Name                                               | Averaged fold-change (log <sub>2</sub> ) of ASAPratio | Combined ASPAratio p-value |
|-------------------|----------------------------------------------------|-------------------------------------------------------|----------------------------|
| Q9Y3B4            | Pre-mRNA branch site protein p14;                  | -0.62                                                 | 0.04                       |
| Q9UMS4            | Pre-mRNA-processing factor 19;                     | 0.67                                                  | 0.01                       |
| Q9UHV9            | Prefoldin subunit 2;                               | -0.51                                                 | 0.78                       |
| Q9NQP4            | Prefoldin subunit 4;                               | -0.38                                                 | 0.93                       |
| Q99471            | Prefoldin subunit 5;                               | -1.13                                                 | 0.53                       |
| P02545            | Prelamin-A/C;                                      | -0.11                                                 | 0.96                       |
| P07602            | Proactivator polypeptide;                          | 1.61                                                  | 0.23                       |
| Q92841            | Probable ATP-dependent RNA helicase DDX17;         | -0.45                                                 | 0.89                       |
| Q9BUQ8            | Probable ATP-dependent RNA helicase DDX23;         | -1.25                                                 | 0.20                       |
| Q02809            | Procollagen-lysine,2-oxoglutarate 5-dioxygenase 1; | 0.88                                                  | 0.47                       |
| O60568            | Procollagen-lysine,2-oxoglutarate 5-dioxygenase 3; | 0.67                                                  | 0.80                       |
| P07737            | Profilin-1;                                        | -0.66                                                 | 0.75                       |
| P35080            | Profilin-2;                                        | 0.15                                                  | 0.97                       |
| Q8WUM4            | Programmed cell death 6-interacting protein;       | -0.53                                                 | 0.96                       |
| O14737            | Programmed cell death protein 5;                   | -0.37                                                 | 0.89                       |
| O75340            | Programmed cell death protein 6;                   | 0.50                                                  | 0.72                       |
| P12004            | Proliferating cell nuclear antigen;                | -0.53                                                 | 0.85                       |
| Q9UQ80            | Proliferation-associated protein 2G4;              | -0.34                                                 | 0.87                       |
| P48147            | Prolyl endopeptidase;                              | -0.18                                                 | 0.99                       |
| Q8NBP7            | Proprotein convertase subtilisin/kexin type 9;     | 0.08                                                  | 0.81                       |
| Q9UHG2            | ProSAAS;                                           | 0.29                                                  | 0.44                       |
| Q15185            | Prostaglandin E synthase 3;                        | 0.12                                                  | 0.93                       |
| Q9P2B2            | Prostaglandin F2 receptor negative regulator;      | -0.64                                                 | 0.69                       |
| P41222            | Prostaglandin-H2 D-isomerase;                      | 4.10                                                  | 0.00                       |
| Q06323            | Proteasome activator complex subunit 1;            | 0.38                                                  | 0.90                       |
| Q9BT73            | Proteasome assembly chaperone 3;                   | -0.31                                                 | 0.92                       |
| P25786            | Proteasome subunit alpha type-1;                   | -0.18                                                 | 0.97                       |
| P25787            | Proteasome subunit alpha type-2;                   | -0.21                                                 | 0.93                       |
| P28066            | Proteasome subunit alpha type-5;                   | -0.06                                                 | 0.98                       |
| P60900            | Proteasome subunit alpha type-6;                   | -0.31                                                 | 0.91                       |
| O14818            | Proteasome subunit alpha type-7;                   | 0.05                                                  | 1.00                       |
| P20618            | Proteasome subunit beta type-1;                    | -0.21                                                 | 0.98                       |
| P49720            | Proteasome subunit beta type-3;                    | 0.11                                                  | 1.00                       |
| P28072            | Proteasome subunit beta type-6;                    | 0.21                                                  | 0.70                       |
| Q99436            | Proteasome subunit beta type-7;                    | 0.05                                                  | 0.97                       |
| P28062            | Proteasome subunit beta type-8;                    | -0.35                                                 | 0.27                       |
| Q8IVF2            | Protein AHNAK2;                                    | 1.76                                                  | 0.05                       |
| Q99873            | Protein arginine N-methyltransferase 1;            | -0.61                                                 | 0.61                       |
| Q9Y2B0            | Protein canopy homolog 2;                          | 0.08                                                  | 0.84                       |
| O60888            | Protein CutA;                                      | 0.02                                                  | 0.93                       |
| P30101            | Protein disulfide-isomerase A3;                    | 0.24                                                  | 0.97                       |
| P13667            | Protein disulfide-isomerase A4;                    | -0.41                                                 | 0.88                       |
| Q15084            | Protein disulfide-isomerase A6;                    | 0.26                                                  | 0.87                       |
| P07237            | Protein disulfide-isomerase;                       | 0.13                                                  | 0.99                       |
| Q99497            | Protein DJ-1;                                      | -0.60                                                 | 0.74                       |

Table S4

| Uniprot accession | Name                                                    | Averaged fold-change (log <sub>2</sub> ) of ASAPratio | Combined ASPAratio p-value |
|-------------------|---------------------------------------------------------|-------------------------------------------------------|----------------------------|
| Q92520            | Protein FAM3C;                                          | -1.27                                                 | 0.15                       |
| Q9NUQ9            | Protein FAM49B;                                         | -1.66                                                 | 0.02                       |
| Q9UNF0            | Protein kinase C and casein kinase substrate in neurons | -0.46                                                 | 0.66                       |
| Q9BRT6            | Protein LLP homolog;                                    | 0.41                                                  | 0.07                       |
| O14974            | Protein phosphatase 1 regulatory subunit 12A;           | -0.27                                                 | 0.81                       |
| O15355            | Protein phosphatase 1G;                                 | -0.07                                                 | 0.99                       |
| Q9P258            | Protein RCC2;                                           | -0.21                                                 | 0.98                       |
| Q96FQ6            | Protein S100-A16;                                       | -0.18                                                 | 0.87                       |
| P26447            | Protein S100-A4;                                        | -0.93                                                 | 0.57                       |
| P25815            | Protein S100-P;                                         | -2.36                                                 | 0.00                       |
| Q01105            | Protein SET;                                            | -0.09                                                 | 1.00                       |
| P53992            | Protein transport protein Sec24C;                       | 0.50                                                  | 0.94                       |
| O94979            | Protein transport protein Sec31A;                       | 1.16                                                  | 0.05                       |
| P06454            | Prothymosin alpha;                                      | 0.34                                                  | 0.80                       |
| P00491            | Purine nucleoside phosphorylase;                        | 0.62                                                  | 0.69                       |
| P55786            | Puromycin-sensitive aminopeptidase;                     | -0.54                                                 | 0.61                       |
| Q49A26            | Putative oxidoreductase GLYR1;                          | 1.01                                                  | 0.19                       |
| Q6GMV3            | Putative peptidyl-tRNA hydrolase PTRHD1;                | -1.49                                                 | 0.04                       |
| Q8NHP8            | Putative phospholipase B-like 2;                        | 0.97                                                  | 0.33                       |
| Q9Y383            | Putative RNA-binding protein Luc7-like 2;               | -0.27                                                 | 0.96                       |
| A6NL28            | Putative tropomyosin alpha-3 chain-like protein;        | -0.59                                                 | 0.69                       |
| P14618            | Pyruvate kinase isozymes M1/M2;                         | -0.89                                                 | 0.57                       |
| P31150            | Rab GDP dissociation inhibitor alpha;                   | -0.19                                                 | 0.53                       |
| O43504            | Ragulator complex protein LAMTOR5;                      | -0.18                                                 | 0.85                       |
| P43487            | Ran-specific GTPase-activating protein;                 | -0.09                                                 | 0.88                       |
| Q13283            | Ras GTPase-activating protein-binding protein 1;        | -0.52                                                 | 0.85                       |
| P46940            | Ras GTPase-activating-like protein IQGAP1;              | -0.39                                                 | 0.94                       |
| Q15907            | Ras-related protein Rab-11B;                            | -0.30                                                 | 0.96                       |
| P61106            | Ras-related protein Rab-14;                             | -0.31                                                 | 0.54                       |
| P62820            | Ras-related protein Rab-1A;                             | 0.16                                                  | 0.77                       |
| P51149            | Ras-related protein Rab-7a;                             | -0.41                                                 | 0.94                       |
| P10586            | Receptor-type tyrosine-protein phosphatase F;           | 0.75                                                  | 0.70                       |
| P23470            | Receptor-type tyrosine-protein phosphatase gamma;       | -0.39                                                 | 0.86                       |
| Q15262            | Receptor-type tyrosine-protein phosphatase kappa;       | 0.72                                                  | 0.77                       |
| Q9NQG5            | Regulation of nuclear pre-mRNA domain-containing        | -0.50                                                 | 0.79                       |
| P18754            | Regulator of chromosome condensation;                   | -0.37                                                 | 0.73                       |
| O75787            | Renin receptor;                                         | 0.14                                                  | 0.99                       |
| Q9BZR6            | Reticulon-4 receptor;                                   | 0.68                                                  | 0.45                       |
| Q9HB40            | Retinoid-inducible serine carboxypeptidase;             | 0.58                                                  | 0.63                       |
| P52565            | Rho GDP-dissociation inhibitor 1;                       | -0.49                                                 | 0.81                       |
| O75116            | Rho-associated protein kinase 2;                        | -0.95                                                 | 0.29                       |
| P08134            | Rho-related GTP-binding protein RhoC;                   | 0.66                                                  | 0.55                       |
| P13489            | Ribonuclease inhibitor;                                 | -0.74                                                 | 0.63                       |
| O00584            | Ribonuclease T2;                                        | 1.28                                                  | 0.15                       |
| P11908            | Ribose-phosphate pyrophosphokinase 2;                   | -0.38                                                 | 0.56                       |
| Q9Y3A5            | Ribosome maturation protein SBDS;                       | 0.31                                                  | 0.97                       |



Table S4

| Uniprot accession | Name                                                                                                            | Averaged fold-change (log <sub>2</sub> ) of ASAPratio | Combined ASPAratio p-value |
|-------------------|-----------------------------------------------------------------------------------------------------------------|-------------------------------------------------------|----------------------------|
| Q9P2E9            | Ribosome-binding protein 1;                                                                                     | -1.04                                                 | 0.25                       |
| P38159            | RNA-binding motif protein, X chromosome;                                                                        | 0.56                                                  | 0.08                       |
| Q9NTZ6            | RNA-binding protein 12;                                                                                         | 0.25                                                  | 0.43                       |
| P49756            | RNA-binding protein 25;                                                                                         | 0.29                                                  | 0.81                       |
| Q14498            | RNA-binding protein 39;                                                                                         | 0.40                                                  | 0.73                       |
| Q01844            | RNA-binding protein EWS;                                                                                        | -0.10                                                 | 0.93                       |
| P35637            | RNA-binding protein FUS;                                                                                        | 0.42                                                  | 0.73                       |
| Q9Y265            | RuvB-like 1;                                                                                                    | 0.17                                                  | 0.96                       |
| Q9Y230            | RuvB-like 2;                                                                                                    | -0.41                                                 | 0.76                       |
| P31153            | S-adenosylmethionine synthase isoform type-2;                                                                   | -0.27                                                 | 0.92                       |
| P10768            | S-formylglutathione hydrolase;                                                                                  | 0.13                                                  | 0.85                       |
| Q13126            | S-methyl-5'-thioadenosine phosphorylase;                                                                        | -1.75                                                 | 0.14                       |
| Q12765            | Secernin-1;                                                                                                     | 0.49                                                  | 0.64                       |
| Q8WVN6            | Secreted and transmembrane protein 1;                                                                           | 1.36                                                  | 0.04                       |
| P49903            | Selenide, water dikinase 1;                                                                                     | -0.32                                                 | 0.77                       |
| Q14563            | Semaphorin-3A;                                                                                                  | 1.67                                                  | 0.04                       |
| Q99985            | Semaphorin-3C;                                                                                                  | -0.11                                                 | 0.96                       |
| Q9NPR2            | Semaphorin-4B;                                                                                                  | 0.19                                                  | 0.97                       |
| Q9H3T2            | Semaphorin-6C;                                                                                                  | -1.40                                                 | 0.01                       |
| Q9NVA2            | Septin-11;                                                                                                      | 0.44                                                  | 0.88                       |
| Q15019            | Septin-2;                                                                                                       | 0.01                                                  | 0.90                       |
| Q9UHD8            | Septin-9;                                                                                                       | -0.40                                                 | 0.92                       |
| O95084            | Serine protease 23;                                                                                             | -0.87                                                 | 0.43                       |
| Q92743            | Serine protease HTRA1;                                                                                          | 0.21                                                  | 0.62                       |
| P49591            | Serine--tRNA ligase, cytoplasmic;                                                                               | -0.35                                                 | 0.91                       |
| Q9Y3F4            | Serine-threonine kinase receptor-associated protein;                                                            | -0.32                                                 | 0.96                       |
| Q9UQ35            | Serine/arginine repetitive matrix protein 2;                                                                    | -0.50                                                 | 0.99                       |
| Q07955            | Serine/arginine-rich splicing factor 1;                                                                         | 0.77                                                  | 0.67                       |
| Q05519            | Serine/arginine-rich splicing factor 11;                                                                        | 0.21                                                  | 0.61                       |
| Q13247            | Serine/arginine-rich splicing factor 6;                                                                         | 0.81                                                  | 0.54                       |
| Q16629            | Serine/arginine-rich splicing factor 7;                                                                         | 0.44                                                  | 0.69                       |
| Q13242            | Serine/arginine-rich splicing factor 9;                                                                         | 0.88                                                  | 0.23                       |
| O95747            | Serine/threonine-protein kinase OSR1;                                                                           | 0.41                                                  | 0.84                       |
| Q13177            | Serine/threonine-protein kinase PAK 2;                                                                          | 0.87                                                  | 0.72                       |
| P30153            | Serine/threonine-protein phosphatase 2A 65 kDa                                                                  | -0.60                                                 | 0.81                       |
| Q15257            | Serine/threonine-protein phosphatase 2A activator;<br>Serine/threonine-protein phosphatase 2A catalytic subunit | -0.25                                                 | 0.71                       |
| P62714            | beta isoform;                                                                                                   | -0.78                                                 | 0.50                       |
| P62136            | Serine/threonine-protein phosphatase PP1-alpha catalytic                                                        | -0.25                                                 | 0.95                       |
| P36952            | Serpin B5;                                                                                                      | -0.03                                                 | 0.97                       |
| P50454            | Serpin H1;                                                                                                      | 0.52                                                  | 0.82                       |
| Q9BXP5            | Serrate RNA effector molecule homolog;                                                                          | 0.05                                                  | 0.64                       |
| P02768            | Serum albumin;                                                                                                  | -0.09                                                 | 1.00                       |
| O95810            | Serum deprivation-response protein;                                                                             | 0.50                                                  | 0.76                       |
| P29353            | SHC-transforming protein 1;                                                                                     | 0.17                                                  | 0.98                       |
| Q9HAT2            | Sialate O-acetyltransferase;                                                                                    | 1.13                                                  | 0.23                       |

Table S4

| Uniprot accession | Name                                                  | Averaged fold-change (log <sub>2</sub> ) of ASAPratio | Combined ASPAratio p-value |
|-------------------|-------------------------------------------------------|-------------------------------------------------------|----------------------------|
| Q9NR45            | Sialic acid synthase;                                 | -1.20                                                 | 0.07                       |
| Q99519            | Sialidase-1;                                          | 0.03                                                  | 0.75                       |
| P49458            | Signal recognition particle 9 kDa protein;            | 0.40                                                  | 0.37                       |
| P62304            | Small nuclear ribonucleoprotein E;                    | 0.22                                                  | 0.74                       |
| P62306            | Small nuclear ribonucleoprotein F;                    | 0.97                                                  | 0.01                       |
| P62316            | Small nuclear ribonucleoprotein Sm D2;                | 0.07                                                  | 0.55                       |
| P62318            | Small nuclear ribonucleoprotein Sm D3;                | 0.37                                                  | 0.51                       |
| P14678            | Small nuclear ribonucleoprotein-associated proteins B | 0.00                                                  | 0.63                       |
| P63165            | Small ubiquitin-related modifier 1;                   | -0.14                                                 | 0.90                       |
| P55854            | Small ubiquitin-related modifier 3;                   | 0.10                                                  | 0.88                       |
| P05023            | Sodium/potassium-transporting ATPase subunit alpha-1; | 0.60                                                  | 0.78                       |
| Q8WVQ1            | Soluble calcium-activated nucleotidase 1;             | 0.28                                                  | 0.94                       |
| Q00796            | Sorbitol dehydrogenase;                               | -0.81                                                 | 0.51                       |
| P30626            | Sorcin;                                               | -0.49                                                 | 0.82                       |
| Q9Y5X3            | Sorting nexin-5;                                      | -0.59                                                 | 0.66                       |
| P09486            | SPARC;                                                | 0.30                                                  | 0.67                       |
| Q13813            | Spectrin alpha chain, non-erythrocytic 1;             | 0.37                                                  | 0.95                       |
| Q01082            | Spectrin beta chain, non-erythrocytic 1;              | 0.08                                                  | 0.99                       |
| P52788            | Spermine synthase;                                    | -0.50                                                 | 0.60                       |
| Q13838            | Spliceosome RNA helicase DDX39B;                      | -0.02                                                 | 0.94                       |
| Q15637            | Splicing factor 1;                                    | -0.44                                                 | 0.96                       |
| Q15459            | Splicing factor 3A subunit 1;                         | 0.00                                                  | 0.96                       |
| Q15428            | Splicing factor 3A subunit 2;                         | 1.41                                                  | 0.00                       |
| O75533            | Splicing factor 3B subunit 1;                         | 0.30                                                  | 0.98                       |
| Q15393            | Splicing factor 3B subunit 3;                         | 0.26                                                  | 0.87                       |
| P26368            | Splicing factor U2AF 65 kDa subunit;                  | -0.11                                                 | 0.98                       |
| P23246            | Splicing factor, proline- and glutamine-rich;         | 0.45                                                  | 0.92                       |
| Q14247            | Src substrate cortactin;                              | 0.09                                                  | 0.00                       |
| Q7KZF4            | Staphylococcal nuclease domain-containing protein 1;  | -0.04                                                 | 0.93                       |
| P38646            | Stress-70 protein, mitochondrial;                     | 0.64                                                  | 0.61                       |
| P31948            | Stress-induced-phosphoprotein 1;                      | -0.39                                                 | 0.93                       |
| Q14683            | Structural maintenance of chromosomes protein 1A;     | 0.97                                                  | 0.41                       |
| Q8NBJ7            | Sulfatase-modifying factor 2;                         | 0.19                                                  | 0.91                       |
| O00391            | Sulfhydryl oxidase 1;                                 | 1.17                                                  | 0.23                       |
| Q6ZRP7            | Sulfhydryl oxidase 2;                                 | -0.33                                                 | 0.94                       |
| Q9UBT2            | SUMO-activating enzyme subunit 2;                     | 0.12                                                  | 0.98                       |
| P63279            | SUMO-conjugating enzyme UBC9;                         | -0.27                                                 | 0.93                       |
| P42285            | Superkiller viralicidic activity 2-like 2;            | -0.01                                                 | 0.94                       |
| P00441            | Superoxide dismutase [Cu-Zn];                         | -0.14                                                 | 0.99                       |
| P04179            | Superoxide dismutase [Mn], mitochondrial;             | 0.44                                                  | 0.79                       |
| P78539            | Sushi repeat-containing protein SRPX;                 | -0.53                                                 | 0.37                       |
| O60687            | Sushi repeat-containing protein SRPX2;                | -0.02                                                 | 0.90                       |
| Q99536            | Synaptic vesicle membrane protein VAT-1 homolog;      | 0.30                                                  | 0.83                       |
| O00560            | Syntenin-1;                                           | -0.18                                                 | 0.84                       |
| P17987            | T-complex protein 1 subunit alpha;                    | -0.28                                                 | 0.96                       |
| P78371            | T-complex protein 1 subunit beta;                     | -0.61                                                 | 0.78                       |

Table S4

| Uniprot accession | Name                                                   | Averaged fold-change (log <sub>2</sub> ) of ASAPratio | Combined ASPAratio p-value |
|-------------------|--------------------------------------------------------|-------------------------------------------------------|----------------------------|
| P50991            | T-complex protein 1 subunit delta;                     | -0.53                                                 | 0.88                       |
| P48643            | T-complex protein 1 subunit epsilon;                   | -0.37                                                 | 0.95                       |
| Q99832            | T-complex protein 1 subunit eta;                       | -0.39                                                 | 0.89                       |
| P49368            | T-complex protein 1 subunit gamma;                     | -0.41                                                 | 0.91                       |
| P50990            | T-complex protein 1 subunit theta;                     | -0.59                                                 | 0.75                       |
| P40227            | T-complex protein 1 subunit zeta;                      | -0.96                                                 | 0.36                       |
| Q9Y490            | Talin-1;                                               | -0.35                                                 | 0.94                       |
| Q7Z7G0            | Target of Nesh-SH3;                                    | 4.38                                                  | 0.00                       |
| Q08629            | Testican-1;                                            | 2.12                                                  | 0.00                       |
| Q9BRA2            | Thioredoxin domain-containing protein 17;              | -0.20                                                 | 0.98                       |
| Q8NBS9            | Thioredoxin domain-containing protein 5;               | -0.56                                                 | 0.93                       |
| Q16881            | Thioredoxin reductase 1, cytoplasmic;                  | 0.41                                                  | 0.77                       |
| P30048            | Thioredoxin-dependent peroxide reductase,              | 1.30                                                  | 0.05                       |
| Q86V81            | THO complex subunit 4;                                 | -0.47                                                 | 0.49                       |
| P26639            | Threonine--tRNA ligase, cytoplasmic;                   | 0.38                                                  | 0.96                       |
| P07996            | Thrombospondin-1;                                      | -1.59                                                 | 0.07                       |
| P49746            | Thrombospondin-3;                                      | 2.43                                                  | 0.00                       |
| Q9Y2W1            | Thyroid hormone receptor-associated protein 3;         | -0.18                                                 | 0.99                       |
| Q9UKU6            | Thyrotropin-releasing hormone-degrading ectoenzyme;    | 0.03                                                  | 0.69                       |
| Q9UDY2            | Tight junction protein ZO-2;                           | -1.32                                                 | 0.22                       |
| O75663            | TIP41-like protein;                                    | 0.64                                                  | 0.63                       |
| P10646            | Tissue factor pathway inhibitor;                       | 2.10                                                  | 0.00                       |
| Q8WZ42            | Titin;                                                 | 1.03                                                  | 0.06                       |
| O14657            | Torsin-1B;                                             | 0.71                                                  | 0.24                       |
| Q96EM0            | Trans-L-3-hydroxyproline dehydratase;                  | -0.60                                                 | 0.69                       |
| P37837            | Transaldolase;                                         | -0.26                                                 | 0.97                       |
| P20062            | Transcobalamin-2;                                      | 0.98                                                  | 0.34                       |
| P23193            | Transcription elongation factor A protein 1;           | -0.05                                                 | 0.61                       |
| Q15370            | Transcription elongation factor B polypeptide 2;       | 0.05                                                  | 0.79                       |
| O00267            | Transcription elongation factor SPT5;                  | -0.64                                                 | 0.73                       |
| Q7KZ85            | Transcription elongation factor SPT6;                  | 0.29                                                  | 0.76                       |
| O14776            | Transcription elongation regulator 1;                  | 0.40                                                  | 0.82                       |
| P20290            | Transcription factor BTF3;                             | 0.41                                                  | 0.85                       |
| Q13263            | Transcription intermediary factor 1-beta;              | -0.28                                                 | 0.96                       |
| P02786            | Transferrin receptor protein 1;                        | 1.85                                                  | 0.04                       |
| P01137            | Transforming growth factor beta-1;                     | 1.60                                                  | 0.04                       |
| Q15582            | Transforming growth factor-beta-induced protein ig-h3; | -1.22                                                 | 0.40                       |
| P37802            | Transgelin-2;                                          | -0.14                                                 | 0.98                       |
| P55072            | Transitional endoplasmic reticulum ATPase;             | -0.59                                                 | 0.75                       |
| P29401            | Transketolase;                                         | -1.50                                                 | 0.17                       |
| P13693            | Translationally-controlled tumor protein;              | -0.08                                                 | 1.00                       |
| Q99598            | Translin-associated protein X;                         | -0.40                                                 | 0.78                       |
| P49755            | Transmembrane emp24 domain-containing protein 10;      | 1.61                                                  | 0.01                       |
| P22102            | Trifunctional purine biosynthetic protein adenosine-3; | 1.80                                                  | 0.01                       |
| P60174            | Triosephosphate isomerase;                             | -0.97                                                 | 0.41                       |

Table S4

| Uniprot accession | Name                                                   | Averaged fold-change (log <sub>2</sub> ) of ASAPratio | Combined ASPAratio p-value |
|-------------------|--------------------------------------------------------|-------------------------------------------------------|----------------------------|
| O14773            | Tripeptidyl-peptidase 1;                               | 1.08                                                  | 0.20                       |
| Q9Y3I0            | tRNA-splicing ligase RtcB homolog;                     | -0.61                                                 | 0.78                       |
| Q9NYL9            | Tropomodulin-3;                                        | 0.19                                                  | 0.90                       |
| P23381            | Tryptophan--tRNA ligase, cytoplasmic;                  | 0.55                                                  | 0.91                       |
| P07437            | Tubulin beta chain;                                    | -0.03                                                 | 0.57                       |
| P68371            | Tubulin beta-4B chain;                                 | -0.49                                                 | 0.79                       |
| Q14166            | Tubulin--tyrosine ligase-like protein 12;              | -0.13                                                 | 0.84                       |
| Q9GZM7            | Tubulointerstitial nephritis antigen-like;             | 0.13                                                  | 0.91                       |
| O00300            | Tumor necrosis factor receptor superfamily member 11B; | -3.63                                                 | 0.01                       |
| Q9NP84            | Tumor necrosis factor receptor superfamily member 12A; | -0.47                                                 | 0.06                       |
| P19438            | Tumor necrosis factor receptor superfamily member 1A;  | 0.24                                                  | 0.48                       |
| O75509            | Tumor necrosis factor receptor superfamily member 21;  | -0.45                                                 | 0.32                       |
| O95407            | Tumor necrosis factor receptor superfamily member 6B;  | 1.52                                                  | 0.03                       |
| O43399            | Tumor protein D54;                                     | 0.25                                                  | 0.74                       |
| Q12792            | Twinfilin-1;                                           | -0.68                                                 | 0.86                       |
| Q6IBS0            | Twinfilin-2;                                           | -0.38                                                 | 0.91                       |
| Q9GZX9            | Twisted gastrulation protein homolog 1;                | 0.35                                                  | 0.91                       |
| P30530            | Tyrosine-protein kinase receptor UFO;                  | -0.34                                                 | 0.31                       |
| P08621            | U1 small nuclear ribonucleoprotein 70 kDa;             | -0.09                                                 | 0.98                       |
| P09012            | U1 small nuclear ribonucleoprotein A;                  | -0.42                                                 | 0.82                       |
| P09234            | U1 small nuclear ribonucleoprotein C;                  | -1.15                                                 | 0.11                       |
| O43818            | U3 small nucleolar RNA-interacting protein 2;          | 1.63                                                  | 0.02                       |
| O75643            | U5 small nuclear ribonucleoprotein 200 kDa helicase;   | -0.37                                                 | 0.91                       |
| Q9Y333            | U6 snRNA-associated Sm-like protein LSm2;              | -0.15                                                 | 0.35                       |
| P45974            | Ubiquitin carboxyl-terminal hydrolase 5;               | -0.69                                                 | 0.66                       |
| Q93009            | Ubiquitin carboxyl-terminal hydrolase 7;               | 0.24                                                  | 0.84                       |
| P15374            | Ubiquitin carboxyl-terminal hydrolase isozyme L3;      | -0.78                                                 | 0.13                       |
| Q9Y5K5            | Ubiquitin carboxyl-terminal hydrolase isozyme L5;      | 1.01                                                  | 0.24                       |
| O14562            | Ubiquitin domain-containing protein UBFD1;             | -0.28                                                 | 0.95                       |
| Q96FW1            | Ubiquitin thioesterase OTUB1;                          | -0.27                                                 | 0.83                       |
| Q14157            | Ubiquitin-associated protein 2-like;                   | -0.38                                                 | 0.92                       |
| P61086            | Ubiquitin-conjugating enzyme E2 K;                     | -1.13                                                 | 0.32                       |
| P68036            | Ubiquitin-conjugating enzyme E2 L3;                    | -0.34                                                 | 0.91                       |
| P61088            | Ubiquitin-conjugating enzyme E2 N;                     | -0.16                                                 | 0.99                       |
| Q13404            | Ubiquitin-conjugating enzyme E2 variant 1;             | -0.38                                                 | 0.90                       |
| P61960            | Ubiquitin-fold modifier 1;                             | -0.76                                                 | 0.55                       |
| Q9Y3C8            | Ubiquitin-fold modifier-conjugating enzyme 1;          | 2.19                                                  | 0.02                       |
| P22314            | Ubiquitin-like modifier-activating enzyme 1;           | -0.90                                                 | 0.60                       |
| Q14376            | UDP-glucose 4-epimerase;                               | -0.33                                                 | 0.82                       |

Table S4

| Uniprot accession | Name                                            | Averaged fold-change (log <sub>2</sub> ) of ASAPratio | Combined ASPAratio p-value |
|-------------------|-------------------------------------------------|-------------------------------------------------------|----------------------------|
| Q9NYU2            | UDP-glucose:glycoprotein glucosyltransferase 1; | 0.77                                                  | 0.64                       |
| Q16222            | UDP-N-acetylhexosamine pyrophosphorylase;       | 0.01                                                  | 0.60                       |
| P30085            | UMP-CMP kinase;                                 | 0.45                                                  | 0.83                       |
| Q92614            | Unconventional myosin-XVIIIa;                   | -0.37                                                 | 0.90                       |
| Q9HB07            | UPF0160 protein MYG1, mitochondrial;            | -0.66                                                 | 0.58                       |
| Q9H741            | UPF0454 protein C12orf49;                       | -0.09                                                 | 0.70                       |
| Q9Y224            | UPF0568 protein C14orf166;                      | -0.35                                                 | 0.93                       |
| Q9NWX4            | UPF0587 protein C1orf123;                       | -0.51                                                 | 0.85                       |
| P00749            | Urokinase-type plasminogen activator;           | 0.01                                                  | 0.97                       |
| P06132            | Uroporphyrinogen decarboxylase;                 | -0.26                                                 | 0.96                       |
| Q16851            | UTP--glucose-1-phosphate uridylyltransferase;   | -0.40                                                 | 0.88                       |
| P54727            | UV excision repair protein RAD23 homolog B;     | 0.12                                                  | 0.98                       |
| P38606            | V-type proton ATPase catalytic subunit A;       | -0.72                                                 | 0.01                       |
| Q15904            | V-type proton ATPase subunit S1;                | 0.53                                                  | 0.77                       |
| Q9UBQ0            | Vacuolar protein sorting-associated protein 29; | -0.27                                                 | 0.94                       |
| P26640            | Valine--tRNA ligase;                            | -0.58                                                 | 0.69                       |
| P50552            | Vasodilator-stimulated phosphoprotein;          | 0.20                                                  | 0.99                       |
| Q6EMK4            | Vasorin;                                        | 0.54                                                  | 0.67                       |
| O75396            | Vesicle-trafficking protein SEC22b;             | 0.07                                                  | 0.68                       |
| P08670            | Vimentin;                                       | -0.14                                                 | 1.00                       |
| P18206            | Vinculin;                                       | 0.91                                                  | 0.63                       |
| P04004            | Vitronectin;                                    | 0.27                                                  | 0.88                       |
| O75083            | WD repeat-containing protein 1;                 | -1.24                                                 | 0.26                       |
| Q96FK6            | WD repeat-containing protein 89;                | 0.33                                                  | 0.29                       |
| Q2TAY7            | WD40 repeat-containing protein SMU1;            | 0.37                                                  | 0.22                       |
| P13010            | X-ray repair cross-complementing protein 5;     | 0.37                                                  | 0.95                       |
| P12956            | X-ray repair cross-complementing protein 6;     | 0.03                                                  | 0.95                       |
| Q9NQW7            | Xaa-Pro aminopeptidase 1;                       | 0.05                                                  | 1.00                       |
| Q9H1B5            | Xylosyltransferase 2;                           | 0.32                                                  | 0.56                       |
| Q7Z739            | YTH domain family protein 3;                    | 0.66                                                  | 0.62                       |
| O43670            | Zinc finger protein 207;                        | -0.61                                                 | 0.70                       |
| P25311            | Zinc-alpha-2-glycoprotein;                      | -0.26                                                 | 0.08                       |
