# Supplementary material for: Secretome and degradome profiling shows that Kallikrein‐related peptidases 4, 5, 6, and 7 induce TGFβ‐1 signaling in ovarian cancer cells
Source: PubMed Central journal article supplement — Mol Oncol. 2013 Oct 1;8(1):68–82. doi: 10.1016/j.molonc.2013.09.003 (PMC5528505; doi:10.1016/j.molonc.2013.09.003), 2013-10-01
Supplement: MOL2-8-068-s005.pdf [file MOL2-8-068-s005.pdf]

Table S5

Table S5 Analysis of N-termini that were unmodified upon secretome harvest and chemically dimethylated in the TAILS procedure (replicate 1).

This is a non-redundant, peptide-centric list, showing up to three proteins for each peptide identification.

The X! Tandem hyperscore and the mass deviation in ppm are shown.

The overall FDR is < 0.05 as calculated by PeptideProphet.

The prime sequence was experimentally identified, the corresponding non-prime sequence was bioinformatically derived.

The fold-change (Fc) value is based on ASAPratio.

| Non-prime  | Prime                 | Id 1         | Id 2        | Id 3        | Protein (Id1)                                                      | Fold-change (log <sub>2</sub> ) | Fc standard deviation | X! Tandem hyperscore | ppm   |       |
|------------|-----------------------|--------------|-------------|-------------|--------------------------------------------------------------------|---------------------------------|-----------------------|----------------------|-------|-------|
| CQDTQSQQLG | SQPSSNPTPSPLDASPR     | PLCB3_HUMAN  |             |             | 1-phosphatidylinositol 4,5-bisphosphate                            | 0.52                            | 0.03                  | 63.30                | -1.58 |       |
|            | MVQAWYMDDAPGDPR       | MTND_HUMAN   |             |             | phosphodiesterase beta-3; 1,2-dihydroxy-3-keto-5-methylthiopentene | 0.21                            | 0.01                  | 63.30                | 0.42  |       |
| RYDDMAAAMK | AVTEQGHELSNEER        | 1433B_HUMAN  |             |             | 14-3-3 protein beta/alpha;                                         | 2.71                            | 0.20                  | 24.60                | -2.52 |       |
|            | RLGLALNFSV            | FYYEILNSPDR  | 1433E_HUMAN |             | 14-3-3 protein epsilon;                                            | -1.49                           | 0.08                  | 43.50                | -3.44 |       |
| RYDDMAAAMK | NVTELNEPLSNEER        | 1433G_HUMAN  |             |             | 14-3-3 protein gamma;                                              | 2.09                            | 0.21                  | 72.60                | -2.75 |       |
| RYEDMAAFMK | GAVEKGEELSCEER        | 1433S_HUMAN  |             |             | 14-3-3 protein sigma;                                              | 0.41                            | 0.06                  | 81.30                | 4.36  |       |
| YLKMKGDYFR | YLAEVACGDDR           | 1433T_HUMAN  |             |             | 14-3-3 protein theta;                                              | 0.44                            | 0.02                  | 36.00                | 4.08  |       |
| RYDDMATCMK | AVTEQGAELSNEER        | 1433T_HUMAN  |             |             | 14-3-3 protein theta;                                              | -0.16                           | 0.02                  | 76.60                | -0.06 |       |
| RYDDMAACMK | SVTEQGAELSNEER        | 1433Z_HUMAN  |             |             | 14-3-3 protein zeta/delta;                                         | 5.68                            | 0.59                  | 76.90                | -1.52 |       |
|            | YREKIETELR            | DICNDVLSLLEK | 1433Z_HUMAN |             | 14-3-3 protein zeta/delta;                                         | 0.20                            | 0.02                  | 46.10                | -2.96 |       |
|            | LDTLSEESYK            | DSTLIMQLLR   | 1433Z_HUMAN | 1433B_HUMAN | 1433E_HUMAN                                                        | 14-3-3 protein zeta/delta;      | 0.14                  | 0.02                 | 51.20 | -2.37 |
| WEFGKRDSLK | AYASQDANEQGQDLGKR     | TB182_HUMAN  |             |             | 182 kDa tankyrase-1-                                               | 2.26                            | 0.22                  | 28.70                | -2.36 |       |
| AAPDQPCVLF | ADAPEPGQALPVEEEAVTLAR | TB182_HUMAN  |             |             | 182 kDa tankyrase-1-binding protein;                               | 1.28                            | 0.04                  | 43.50                | -6.66 |       |
| FQDSTEPRAS | RVPSSDEEVVEEPQSR      | TB182_HUMAN  |             |             | 182 kDa tankyrase-1-binding protein;                               | 1.06                            | 0.09                  | 39.40                | 0.21  |       |

Table S5

| Non-prime  | Prime                     | Id 1        | Id 2 | Id 3 | Protein (Id1)                                | Fold-change (log <sub>2</sub> ) | Fc standard deviation | X! Tandem hyperscore | ppm   |
|------------|---------------------------|-------------|------|------|----------------------------------------------|---------------------------------|-----------------------|----------------------|-------|
| QVKVIAATNR | VDILDALLR                 | PRS6A_HUMAN |      |      | 26S protease regulatory subunit 6A;          | 0.95                            | 0.11                  | 24.40                | -3.36 |
| RARIMQIHSR | KMNVSPDVNYEELAR           | PRS6A_HUMAN |      |      | 26S protease regulatory subunit 6A;          | 0.78                            | 0.04                  | 30.40                | -3.43 |
| IMQIHSRKMN | VSPDVNYEELAR              | PRS6A_HUMAN |      |      | 26S protease regulatory subunit 6A;          | 0.61                            | 0.07                  | 43.60                | -1.61 |
| ARIMQIHSRK | MNVSPDVNYEELAR            | PRS6A_HUMAN |      |      | 26S protease regulatory subunit 6A;          | -2.25                           | 0.21                  | 36.30                | -2.15 |
|            | MVLESTMVCVDNSEYMR         | PSMD4_HUMAN |      |      | 26S proteasome non-ATPase regulatory subunit | 0.06                            | 0.01                  | 68.00                | 5.49  |
| EAHKEAMSRK | LGQSESQGPPR               | PSMD9_HUMAN |      |      | 26S proteasome non-ATPase regulatory subunit | -0.04                           | 0.00                  | 32.00                | -1.60 |
| IYLARHVGLR | VGIPKETPALTINR            | THIM_HUMAN  |      |      | 3-ketoacyl-CoA thiolase, mitochondrial;      | 4.57                            | 0.54                  | 33.10                | 0.44  |
| SGWMPQAAPC | LSGAPQASAADV VVVHGR       | THIK_HUMAN  |      |      | 3-ketoacyl-CoA thiolase, peroxisomal;        | -1.49                           | 0.13                  | 50.90                | 0.73  |
| GVQRGCGLRL | LSQTQGPPDYPR              | RM49_HUMAN  |      |      | 39S ribosomal protein                        | 0.68                            | 0.05                  | 39.80                | -3.68 |
| GEADRDTYRR | SAVPPGADKKA EAGAGSATEFQFR | RS10_HUMAN  |      |      | 40S ribosomal protein S10;                   | 1.53                            | 0.07                  | 49.20                | -1.32 |
| EQFAWRHFYW | YLTNEGIQYLR               | RS10_HUMAN  |      |      | 40S ribosomal protein                        | -1.16                           | 0.08                  | 31.40                | -2.56 |
| LARSGMKIGR | IEDVTPIPSDSTR             | RS14_HUMAN  |      |      | 40S ribosomal protein S14;                   | 2.00                            | 0.13                  | 39.90                | 2.97  |
| LARSGMKIGR | IEDVTPIPSDSTR             | RS14_HUMAN  |      |      | 40S ribosomal protein                        | 1.93                            | 0.12                  | 51.30                | -0.55 |
| GMKIGRIEDV | TIPIPSDSTR                | RS14_HUMAN  |      |      | 40S ribosomal protein S14;                   | 1.62                            | 0.05                  | 29.40                | -2.79 |
| RSGMKIGRIE | DVTPIPSDSTR               | RS14_HUMAN  |      |      | 40S ribosomal protein S14;                   | 1.06                            | 0.09                  | 37.70                | -1.23 |
| LRALARSGMK | IGRIEDVTPIPSDSTR          | RS14_HUMAN  |      |      | 40S ribosomal protein S14;                   | 0.47                            | 0.03                  | 49.00                | -3.25 |
| CRVTGGMKVK | ADRDESSPYAAMLAAQDVAQR     | RS14_HUMAN  |      |      | 40S ribosomal protein                        | 0.23                            | 0.01                  | 57.10                | -1.13 |
| QKYVDEASKK | EIKDILIQYDR               | RS16_HUMAN  |      |      | 40S ribosomal protein                        | 0.51                            | 0.03                  | 32.10                | 1.76  |

Table S5

| Non-prime  | Prime                  | Id 1        | Id 2 | Id 3 | Protein (Id1)              | Fold-change (log <sub>2</sub> ) | Fc standard deviation | X! Tandem hyperscore | ppm   |
|------------|------------------------|-------------|------|------|----------------------------|---------------------------------|-----------------------|----------------------|-------|
| RKADIDLTKR | AGELTEDEVER            | RS18_HUMAN  |      |      | 40S ribosomal protein S18; | 2.16                            | 0.32                  | 51.20                | -3.45 |
| LRKADIDLTK | RAGELTEDEVER           | RS18_HUMAN  |      |      | 40S ribosomal protein S18; | 0.47                            | 0.03                  | 39.60                | 0.76  |
| MAFKDTGK   | TPVEPEVAIHR            | RS20_HUMAN  |      |      | 40S ribosomal protein S20; | -0.06                           | 0.00                  | 40.40                | -2.74 |
| KTYAICGAIR | RMGESDDSLR             | RS21_HUMAN  |      |      | 40S ribosomal protein S21; | 3.04                            | 0.38                  | 39.10                | -0.61 |
| VTGRFNGQFK | TYAICGAIR              | RS21_HUMAN  |      |      | 40S ribosomal protein S21; | 0.06                            | 0.00                  | 44.00                | -3.02 |
| IIRNVKGPVR | EGDVLTLLESER           | RS28_HUMAN  |      |      | 40S ribosomal protein S28; | 2.60                            | 0.47                  | 47.90                | -1.08 |
| GSQGQCTQVR | VEFMDDTSR              | RS28_HUMAN  |      |      | 40S ribosomal protein S28; | 2.36                            | 0.16                  | 37.50                | -3.01 |
| RTGSQGQCTQ | VRVEFMDDTSR            | RS28_HUMAN  |      |      | 40S ribosomal protein S28; | 0.06                            | 0.00                  | 32.90                | -3.47 |
| KAELNEFLTR | ELAEDGYSGVEVR          | RS3_HUMAN   |      |      | 40S ribosomal protein S3;  | 0.06                            | 0.00                  | 49.30                | 2.88  |
| RKQVADGIFK | AELNEFLTR              | RS3_HUMAN   |      |      | 40S ribosomal protein S3;  | -0.23                           | 0.01                  | 43.80                | -2.23 |
| PDSIGKDIEK | ACQSIYPLHDFVVR         | RS3A_HUMAN  |      |      | 40S ribosomal protein S3a; | 0.99                            | 0.03                  | 34.40                | -1.95 |
| RIGRAGTVRR | QAVDVSPLR              | RS5_HUMAN   |      |      | 40S ribosomal protein S5;  | 1.13                            | 0.06                  | 40.00                | -2.66 |
| TWEKLLLAAR | AIVAIENPADVSVISSR      | RSSA_HUMAN  |      |      | 40S ribosomal protein SA;  | 4.00                            | 0.43                  | 54.70                | -1.86 |
| RNTGQRAVLK | FAAATGATPIAGR          | RSSA_HUMAN  |      |      | 40S ribosomal protein SA;  | -0.04                           | 0.00                  | 55.40                | -0.81 |
| GFHQEVLGK  | DLGGFDEDAEPR           | CAB45_HUMAN |      |      | 45 kDa calcium-binding     | -0.79                           | 0.05                  | 68.50                | 0.59  |
| EMRMQNNSSP | SISPNTSFTSDGSPSPLGGIKR | XRN2_HUMAN  |      |      | 5'-3' exoribonuclease 2;   | 1.41                            | 0.11                  | 37.20                | 4.42  |
| QKEKRKRMRK | DQPAFTPSGILTPHALGSR    | XRN2_HUMAN  |      |      | 5'-3' exoribonuclease 2;   | -0.14                           | 0.01                  | 49.80                | -1.30 |
| SDSPKPPPQR | VTLTLPVLNAAR           | 6PGL_HUMAN  |      |      | 6-phosphogluconolactonase; | 5.04                            | 0.86                  | 24.10                | -3.47 |
| GGSLVSMLAR | ELPAAVAPAGPASLAR       | 6PGL_HUMAN  |      |      | 6-                         | 4.07                            | 0.42                  | 36.80                | -1.25 |

Table S5

| Non-prime   | Prime              | Id 1        | Id 2        | Id 3 | Protein (Id1)                             | Fold-change (log <sub>2</sub> ) | Fc standard deviation | X! Tandem hyperscore | ppm   |
|-------------|--------------------|-------------|-------------|------|-------------------------------------------|---------------------------------|-----------------------|----------------------|-------|
| RVTDALNATR  | AAVEEGIVLGGGCALLR  | CH60_HUMAN  |             |      | 60 kDa heat shock protein, mitochondrial; | 2.23                            | 0.25                  | 89.30                | 0.18  |
| LVIQQVFDNG  | SIYNPEVLDITEETLHSR | RLA0_HUMAN  |             |      | 60S acidic ribosomal protein P0;          | 0.89                            | 0.04                  | 65.10                | -0.89 |
| VFDNGSIYNP  | EVL DITEETLHSR     | RLA0_HUMAN  |             |      | 60S acidic ribosomal protein P0;          | -0.60                           | 0.03                  | 27.70                | -2.03 |
| RKNVNIYRDS  | AIPVESD TDDEGAPR   | NMD3_HUMAN  |             |      | 60S ribosomal export                      | 0.94                            | 0.09                  | 69.40                | -1.50 |
| MSSKVS R    | DTLYEAVR           | RL10A_HUMAN |             |      | 60S ribosomal protein L10a;               | 3.43                            | 0.26                  | 33.80                | -2.71 |
| KLVKKLAKKY  | DAFLASESLIKQIPR    | RL10A_HUMAN |             |      | 60S ribosomal protein                     | -0.06                           | 0.00                  | 30.60                | 1.66  |
| EELK LATQLT | GPVMPVR            | RL13_HUMAN  |             |      | 60S ribosomal protein L13;                | 0.95                            | 0.06                  | 23.40                | -6.25 |
| AEELK LATQL | TGPVMPVR           | RL13_HUMAN  |             |      | 60S ribosomal protein L13;                | 0.83                            | 0.05                  | 27.50                | -4.37 |
| KGDSSAEELK  | LATQLTGPVMPVR      | RL13_HUMAN  |             |      | 60S ribosomal protein L13;                | -0.44                           | 0.04                  | 47.30                | -3.24 |
| ISVDPRRRNK  | STESLQANVQR        | RL13_HUMAN  |             |      | 60S ribosomal protein L13;                | -0.44                           | 0.03                  | 59.20                | -2.77 |
| RYHTKVRAGR  | GFSLEELR           | RL13_HUMAN  |             |      | 60S ribosomal protein L13;                | -0.76                           | 0.03                  | 27.00                | -4.80 |
| M           | GAYKYIQELWR        | RL15_HUMAN  |             |      | 60S ribosomal protein                     | -0.32                           | 0.00                  | 32.50                | -2.87 |
| KMKLPGRENK  | TAVVVGTITDDVR      | RL18_HUMAN  |             |      | 60S ribosomal protein                     | 0.45                            | 0.05                  | 52.10                | -1.16 |
| GTHNMYREYR  | DLTTAGAVTQCYR      | RL18A_HUMAN |             |      | 60S ribosomal protein                     | -0.89                           | 0.08                  | 63.20                | -1.21 |
| KLKADKARKK  | LLADQAEAR          | RL19_HUMAN  |             |      | 60S ribosomal protein                     | -0.04                           | 0.00                  | 32.40                | -2.17 |
| LQERIKVNGK  | AGNLGGGVVTIER      | RL22_HUMAN  |             |      | 60S ribosomal protein                     | 1.57                            | 0.14                  | 63.10                | -2.19 |
| AVKFQRAITG  | ASLADIMAKR         | RL24_HUMAN  |             |      | 60S ribosomal protein                     | 0.56                            | 0.03                  | 29.40                | -3.58 |
| RTRRAVKFQR  | AITGASLADIMAKR     | RL24_HUMAN  |             |      | 60S ribosomal protein L24;                | 0.40                            | 0.03                  | 26.50                | -3.36 |
| M           | KFNPVTS DR         | RL26L_HUMAN | RL26_HUMAN  |      | 60S ribosomal protein                     | 0.41                            | 0.02                  | 39.10                | -1.57 |
| EVQVVRGHYK  | GQQIGKV VQVYR      | RL26L_HUMAN | RL26_HUMAN  |      | 60S ribosomal protein                     | 0.04                            | 0.00                  | 27.10                | -4.43 |
| MK          | FNPVTS DR          | RL26L_HUMAN | RL26_HUMAN  |      | 60S ribosomal protein L26-like 1;         | -0.12                           | 0.01                  | 32.30                | -3.06 |
| YNVRSMPIRK  | DDEVQVVR           | RL26_HUMAN  | RL26L_HUMAN |      | 60S ribosomal protein L26;                | 0.52                            | 0.01                  | 32.70                | -5.06 |

Table S5

| Non-prime  | Prime            | Id 1        | Id 2 | Id 3 | Protein (Id1)                            | Fold-change (log <sub>2</sub> ) | Fc standard deviation | X! Tandem hyperscore | ppm   |
|------------|------------------|-------------|------|------|------------------------------------------|---------------------------------|-----------------------|----------------------|-------|
| QTRVNAAKNK | TGAAPIIDVVR      | RL27A_HUMAN |      |      | 60S ribosomal protein                    | -0.66                           | 0.05                  | 43.40                | -2.89 |
| KAKDQTKAQA | AAPASVPAQAPKR    | RL29_HUMAN  |      |      | 60S ribosomal protein L29;               | 1.59                            | 0.10                  | 21.70                | -1.82 |
| AKAKAKDQTK | AQAAAPASVPAQAPKR | RL29_HUMAN  |      |      | 60S ribosomal protein L29;               | 0.56                            | 0.05                  | 41.30                | -1.07 |
| AKAKDQTKAQ | AAAPASVPAQAPKR   | RL29_HUMAN  |      |      | 60S ribosomal protein L29;               | 0.14                            | 0.01                  | 31.30                | -3.06 |
| LGTACGKYR  | VCTLAIDPGDSIIR   | RL30_HUMAN  |      |      | 60S ribosomal protein L30;               | 2.22                            | 0.16                  | 39.00                | -0.06 |
| ELGTACGKYY | RVCTLAIDPGDSIIR  | RL30_HUMAN  |      |      | 60S ribosomal protein                    | 0.67                            | 0.03                  | 33.00                | -4.48 |
| KKGGEKKKGR | SAINEVVTR        | RL31_HUMAN  |      |      | 60S ribosomal protein L31;               | 1.13                            | 0.09                  | 33.60                | -3.03 |
| AKKGGEKKKG | RSAINEVVTR       | RL31_HUMAN  |      |      | 60S ribosomal protein L31;               | 0.56                            | 0.05                  | 29.40                | 1.95  |
| PRVRGGGTHR | SGQGAFGNMCR      | RL4_HUMAN   |      |      | 60S ribosomal protein L4;                | -0.49                           | 0.02                  | 39.30                | -3.36 |
| GDEYNVESID | GQPGAFTCYLDAGLAR | RL5_HUMAN   |      |      | 60S ribosomal protein L5;                | -1.29                           | 0.10                  | 55.70                | 0.00  |
| RVVKLRKMPR | YYPTEDVPR        | RL6_HUMAN   |      |      | 60S ribosomal protein L6;                | -1.25                           | 0.06                  | 31.00                | -3.24 |
| ALAKLVEAIR | TNYNDRYDEIR      | RL7A_HUMAN  |      |      | 60S ribosomal protein                    | 3.84                            | 0.33                  | 32.70                | -3.69 |
| SKKVISSANR | AVVGVVAGGGR      | RL8_HUMAN   |      |      | 60S ribosomal protein L8;                | 3.41                            | 0.58                  | 37.90                | -4.12 |
| KPGDRGKLAR | ASGNYATVISHNPETK | RL8_HUMAN   |      |      | 60S ribosomal protein L8;                | 0.56                            | 0.03                  | 33.20                | -4.87 |
| FNDAQRQATK | DAGTIAGLNVMR     | GRP78_HUMAN |      |      | 78 kDa glucose-regulated protein;        | 2.58                            | 0.21                  | 47.60                | 0.40  |
| EIIANDQGNR | ITPSYVAFTPEGER   | GRP78_HUMAN |      |      | 78 kDa glucose-regulated protein;        | 1.34                            | 0.08                  | 35.80                | -0.81 |
| KVLEDSLK   | SDIDEIVLVGGSTR   | GRP78_HUMAN |      |      | 78 kDa glucose-regulated                 | 0.85                            | 0.03                  | 39.40                | -1.68 |
| VEPWSQCSRS | CGGGVQER         | ATS12_HUMAN |      |      | A disintegrin and metalloproteinase with | -4.68                           | 1.20                  | 20.10                | -1.34 |

Table S5

| Non-prime   | Prime                    | Id 1        | Id 2 | Id 3 | Protein (Id1)                            | Fold-change (log <sub>2</sub> ) | Fc standard deviation | X! Tandem hyperscore | ppm   |
|-------------|--------------------------|-------------|------|------|------------------------------------------|---------------------------------|-----------------------|----------------------|-------|
| VTPFYNTLTK  | GPMEIHSGSGEER            | ATS12_HUMAN |      |      | A disintegrin and metalloproteinase with | -6.27                           | 0.00                  | 26.20                | -3.22 |
| LPSRFIESAH  | TELAKDDAAPAPPVADAKAQDR   | AKAP1_HUMAN |      |      | A-kinase anchor protein 1,               | 2.19                            | 0.18                  | 38.20                | -2.65 |
| ALLTEEVLER  | EVIAEEEPPTVTEPLPENR      | AKA12_HUMAN |      |      | A-kinase anchor protein 12;              | 6.23                            | 0.99                  | 66.90                | -1.33 |
| PEDVLQPVQR  | AEAERPEEQAEASGLK         | AKA12_HUMAN |      |      | A-kinase anchor protein 12;              | 3.39                            | 0.27                  | 32.00                | -0.17 |
| IEVHQEEVVA  | EVHVSTVEER               | AKA12_HUMAN |      |      | A-kinase anchor protein 12;              | 2.27                            | 0.14                  | 29.70                | -3.36 |
| AVA EKVKES  | QLPGTGGPEDVLQPVQR        | AKA12_HUMAN |      |      | A-kinase anchor protein                  | 1.70                            | 0.10                  | 32.40                | -2.53 |
| SSKLVQNIHQ  | TAVDQFVR                 | AKA12_HUMAN |      |      | A-kinase anchor protein                  | 1.55                            | 0.06                  | 29.20                | -4.46 |
| VIAEEEPPTV  | TEPLPENR                 | AKA12_HUMAN |      |      | A-kinase anchor protein                  | 1.52                            | 0.03                  | 25.00                | 0.00  |
| ETGSTFKKFF  | TQGWAGWR                 | AKA12_HUMAN |      |      | A-kinase anchor protein 12;              | 1.31                            | 0.07                  | 29.10                | -2.73 |
| MAAAVADGTR  | AATIIER                  | AKA12_HUMAN |      |      | A-kinase anchor protein 12;              | 1.15                            | 0.03                  | 31.80                | -3.11 |
| VLQAVA EKVK | EESQLPGTGGPEDVLQPVQR     | AKA12_HUMAN |      |      | A-kinase anchor protein 12;              | 0.76                            | 0.04                  | 56.10                | -3.09 |
| EEATPVQEVE  | GGVPDIEEQERR             | AKA12_HUMAN |      |      | A-kinase anchor protein 12;              | 0.74                            | 0.06                  | 31.10                | -1.20 |
| SPDTTEEATP  | VQEVEGGVPDIEEQER         | AKA12_HUMAN |      |      | A-kinase anchor protein                  | 0.71                            | 0.08                  | 66.40                | -2.22 |
| SQEHPGQGS   | SSPEQAGSPTEGEGVSTWESFKR  | AKA12_HUMAN |      |      | A-kinase anchor protein 12;              | 0.64                            | 0.07                  | 26.40                | -0.12 |
| ISASVTEPLE  | QVEAEAALLTEEVLER         | AKA12_HUMAN |      |      | A-kinase anchor protein 12;              | 0.59                            | 0.07                  | 90.10                | -0.60 |
| LTDSPDTTEE  | ATPVQEVEGGVPDIEEQER      | AKA12_HUMAN |      |      | A-kinase anchor protein                  | 0.49                            | 0.01                  | 75.90                | 5.67  |
| EPLQVEAEA   | ALLTEEVLER               | AKA12_HUMAN |      |      | A-kinase anchor protein                  | 0.38                            | 0.03                  | 36.90                | 0.66  |
| EEATPVQEVE  | GGVPDIEEQER              | AKA12_HUMAN |      |      | A-kinase anchor protein                  | 0.37                            | 0.02                  | 51.00                | -1.03 |
| AVSQLTDSPT  | TTEEATPVQEVEGGVPDIEEQERR | AKA12_HUMAN |      |      | A-kinase anchor protein 12;              | 0.35                            | 0.01                  | 50.90                | 0.11  |
| KDVPPFEGLE  | GSIDTGITVSR              | AKA12_HUMAN |      |      | A-kinase anchor protein                  | 0.16                            | 0.01                  | 44.90                | -2.64 |
| EEVLEREVIA  | EEEPPTVTEPLPENR          | AKA12_HUMAN |      |      | A-kinase anchor protein 12;              | 0.11                            | 0.01                  | 72.70                | 2.37  |

Table S5

| Non-prime  | Prime                  | Id 1        | Id 2        | Id 3        | Protein (Id1)                                                  | Fold-change (log <sub>2</sub> ) | Fc standard deviation | X! Tandem hyperscore | ppm   |
|------------|------------------------|-------------|-------------|-------------|----------------------------------------------------------------|---------------------------------|-----------------------|----------------------|-------|
| EATPVQEVEG | GVPDIEEQER             | AKA12_HUMAN |             |             | A-kinase anchor protein 12;                                    | -0.08                           | 0.01                  | 29.80                | -3.32 |
| EATPVQEVEG | GVPDIEEQERR            | AKA12_HUMAN |             |             | A-kinase anchor protein                                        | -0.10                           | 0.01                  | 32.70                | -0.44 |
| VLEREVIAEE | EPPTVTEPLPENR          | AKA12_HUMAN |             |             | A-kinase anchor protein 12;                                    | -0.25                           | 0.02                  | 46.00                | 0.13  |
| SPDTTEEATP | VQEVEGGVPDIEEQERR      | AKA12_HUMAN |             |             | A-kinase anchor protein 12;                                    | -0.34                           | 0.03                  | 29.60                | 1.60  |
| EAALLTEEV  | EREVIAEEEEPPTVTEPLPENR | AKA12_HUMAN |             |             | A-kinase anchor protein                                        | -0.49                           | 0.04                  | 56.20                | 1.62  |
| SVTEPLEQVE | AEAALLTEEVLER          | AKA12_HUMAN |             |             | A-kinase anchor protein 12;                                    | -0.66                           | 0.05                  | 58.80                | 2.44  |
| LTDSPDTTEE | ATPVQEVEGGVPDIEEQERR   | AKA12_HUMAN |             |             | A-kinase anchor protein                                        | -0.76                           | 0.01                  | 33.10                | -0.13 |
| EVLEREVIAE | EEPPTVTEPLPENR         | AKA12_HUMAN |             |             | A-kinase anchor protein                                        | -0.86                           | 0.05                  | 40.70                | -1.34 |
| TEEVLEREVI | AEEEPPTVTEPLPENR       | AKA12_HUMAN |             |             | A-kinase anchor protein                                        | -1.20                           | 0.06                  | 56.40                | -1.09 |
| DQFSRSVNV  | LTQEELDSGLDELSVR       | AKAP2_HUMAN |             |             | A-kinase anchor protein 2;                                     | 3.24                            | 0.25                  | 40.80                | -3.16 |
| PGAVVLVGG  | SPPVHEATQPEPTER        | AKAP2_HUMAN |             |             | A-kinase anchor protein                                        | 1.97                            | 0.18                  | 35.90                | -3.05 |
| LLQKQLQQQ  | QQPPSQLCTAPASSHER      | AKAP2_HUMAN |             |             | A-kinase anchor protein 2;                                     | 1.91                            | 0.12                  | 35.40                | -5.09 |
| GLQQPQRGI  | RGSSAARPSGR            | ABL2_HUMAN  |             |             | Abelson tyrosine-protein                                       | 4.52                            | 0.44                  | 39.00                | 1.06  |
| CLKSLDFNC  | EVTNLNDYR              | AN32A_HUMAN | AN32B_HUMAN |             | Acidic leucine-rich nuclear phosphoprotein 32 family member A; | -0.32                           | 0.02                  | 30.20                | -3.37 |
|            | MILLEVNNR              | ARPC2_HUMAN |             |             | Actin-related protein 2/3 complex subunit 2;                   | -0.27                           | 0.01                  | 44.10                | -2.99 |
| DENKFDVEED | GGDGQAGPDEGEVDSCLR     | ARPC5_HUMAN |             |             | Actin-related protein 2/3 complex subunit 5;                   | -0.10                           | 0.01                  | 76.90                | -3.13 |
| TVASSSSLEK | SYELPDGQVITIGNER       | ACTA_HUMAN  | ACTBL_HUMAN | ACTBM_HUMAN | Actin, aortic smooth muscle;                                   | 2.62                            | 0.10                  | 98.30                | -1.48 |
| RKDLYANNVM | SGGTTMYPGIADR          | ACTA_HUMAN  | ACTB_HUMAN  | ACTC_HUMAN  | Actin, aortic smooth                                           | 1.31                            | 0.13                  | 35.40                | -0.89 |
| ASSSSLEKSY | ELPDGQVITIGNER         | ACTA_HUMAN  | ACTBL_HUMAN | ACTBM_HUMAN | Actin, aortic smooth                                           | 1.00                            | 0.09                  | 35.80                | -2.93 |
| DIRKDLYANN | VLSGGTTMYPGIADR        | ACTA_HUMAN  | ACTB_HUMAN  | ACTC_HUMAN  | Actin, aortic smooth                                           | 0.23                            | 0.02                  | 33.70                | 0.70  |

Table S5

| Non-prime   | Prime                 | Id 1       | Id 2        | Id 3        | Protein (Id1)                | Fold-change (log <sub>2</sub> ) | Fc standard deviation | X! Tandem hyperscore | ppm   |
|-------------|-----------------------|------------|-------------|-------------|------------------------------|---------------------------------|-----------------------|----------------------|-------|
| VASSSLEKS   | YELPDGQVITIGNER       | ACTA_HUMAN | ACTBL_HUMAN | ACTBM_HUMAN | Actin, aortic smooth         | -0.32                           | 0.03                  | 36.50                | 4.62  |
| IRKDLYANNV  | LSGGTTMYPGIADR        | ACTA_HUMAN | ACTB_HUMAN  | ACTC_HUMAN  | Actin, aortic smooth muscle; | -0.37                           | 0.02                  | 43.60                | 0.27  |
| AGFAGDDAPR  | AVFPSIVGRPR           | ACTB_HUMAN | ACTA_HUMAN  | ACTBM_HUMAN | Actin, cytoplasmic 1;        | 4.24                            | 0.32                  | 28.20                | -0.81 |
| VAPEEHPILL  | TEAPLNPKANR           | ACTB_HUMAN | ACTA_HUMAN  | ACTBM_HUMAN | Actin, cytoplasmic 1;        | 2.49                            | 0.16                  | 28.00                | -2.58 |
| WHHTFYNELR  | VAPEEHPVLLTEAPLNPK    | ACTB_HUMAN | ACTG_HUMAN  |             | Actin, cytoplasmic 1;        | 2.27                            | 0.13                  | 53.10                | -2.24 |
| DTAVLVIDNG  | SGMCKAGFAGDDAPR       | ACTB_HUMAN | ACTG_HUMAN  | POTEE_HUMAN | Actin, cytoplasmic 1;        | 1.75                            | 0.19                  | 54.60                | -0.38 |
| EMATVASSSS  | LEKSYELPDGQVITIGNER   | ACTB_HUMAN | ACTA_HUMAN  | ACTC_HUMAN  | Actin, cytoplasmic 1;        | 1.63                            | 0.07                  | 58.60                | 1.17  |
| WHHTFYNELR  | VAPEEHPVLLTEAPLNPKANR | ACTB_HUMAN | ACTG_HUMAN  |             | Actin, cytoplasmic 1;        | 1.20                            | 0.06                  | 60.80                | -2.49 |
| ATVASSSSLE  | KSYELPDGQVITIGNER     | ACTB_HUMAN | ACTA_HUMAN  | ACTBM_HUMAN | Actin, cytoplasmic 1;        | 0.95                            | 0.03                  | 63.20                | -2.31 |
| MDDDIAALV   | VDNGSGMCKAGFAGDDAPR   | ACTB_HUMAN |             |             | Actin, cytoplasmic 1;        | 0.92                            | 0.07                  | 33.70                | -1.95 |
| QGVVMVGMGQK | DSYVGDEAQSQR          | ACTB_HUMAN | ACTA_HUMAN  | ACTC_HUMAN  | Actin, cytoplasmic 1;        | 0.75                            | 0.06                  | 31.90                | -1.26 |
| IDNGSGMCKA  | GFAGDDAPR             | ACTB_HUMAN | ACTA_HUMAN  | ACTC_HUMAN  | Actin, cytoplasmic 1;        | 0.69                            | 0.06                  | 44.80                | -2.34 |
| FQQMWISKQE  | YDESGPSIVHR           | ACTB_HUMAN | ACTBM_HUMAN | ACTG_HUMAN  | Actin, cytoplasmic 1;        | 0.65                            | 0.07                  | 43.20                | 4.27  |
| DDTAVLVIDN  | GSGMCKAGFAGDDAPR      | ACTB_HUMAN | ACTG_HUMAN  | POTEE_HUMAN | Actin, cytoplasmic 1;        | 0.48                            | 0.03                  | 40.40                | -1.32 |
| QEMATVASSS  | SLEKSYELPDGQVITIGNER  | ACTB_HUMAN | ACTA_HUMAN  | ACTC_HUMAN  | Actin, cytoplasmic 1;        | 0.35                            | 0.02                  | 50.10                | 3.54  |
| QQMWISKQEY  | DESGPSIVHR            | ACTB_HUMAN | ACTBM_HUMAN | ACTG_HUMAN  | Actin, cytoplasmic 1;        | 0.28                            | 0.01                  | 34.90                | -0.71 |
| TFQQMWISKQ  | EYDESGPSIVHR          | ACTB_HUMAN | ACTBM_HUMAN | ACTG_HUMAN  | Actin, cytoplasmic 1;        | 0.23                            | 0.01                  | 47.60                | -1.76 |
| SLEKSYELPD  | GQVITIGNER            | ACTB_HUMAN | ACTA_HUMAN  | ACTBL_HUMAN | Actin, cytoplasmic 1;        | -0.02                           | 0.00                  | 56.50                | -4.01 |
| DYLMKILTER  | GYSFTTTAER            | ACTB_HUMAN | ACTG_HUMAN  |             | Actin, cytoplasmic 1;        | -0.08                           | 0.01                  | 38.10                | -3.08 |
| LRLDLAGREL  | TDYLMKILTER           | ACTB_HUMAN | ACTA_HUMAN  | ACTBL_HUMAN | Actin, cytoplasmic 1;        | -0.25                           | 0.01                  | 25.30                | -0.76 |
| VPAMYVAIQ   | VLSLYASGR             | ACTB_HUMAN | ACTA_HUMAN  | ACTBL_HUMAN | Actin, cytoplasmic 1;        | -0.63                           | 0.03                  | 26.60                | -6.03 |
| VIDNGSGMCK  | AGFAGDDAPR            | ACTB_HUMAN | ACTA_HUMAN  | ACTC_HUMAN  | Actin, cytoplasmic 1;        | -0.76                           | 0.04                  | 44.20                | 1.19  |



Table S5

| Non-prime  | Prime                 | Id 1        | Id 2        | Id 3        | Protein (Id1)                                 | Fold-change (log <sub>2</sub> ) | Fc standard deviation | X! Tandem hyperscore | ppm   |
|------------|-----------------------|-------------|-------------|-------------|-----------------------------------------------|---------------------------------|-----------------------|----------------------|-------|
| IMKCDVDIRK | DLYANTVLSGGTTMYPGIADR | ACTB_HUMAN  | ACTG_HUMAN  |             | Actin, cytoplasmic 1;                         | -0.76                           | 0.04                  | 38.50                | -1.87 |
| GDGVTHTVPI | YEGYALPHAILR          | ACTB_HUMAN  | ACTBL_HUMAN | ACTG_HUMAN  | Actin, cytoplasmic 1;                         | -0.79                           | 0.04                  | 34.00                | -5.14 |
| WDDMEKIWHH | TFYNELR               | ACTB_HUMAN  | ACTBL_HUMAN | ACTBM_HUMAN | Actin, cytoplasmic 1;                         | -0.89                           | 0.03                  | 28.10                | -3.07 |
| ELRVAPEEHP | VLLTEAPLNPKANR        | ACTB_HUMAN  | ACTG_HUMAN  |             | Actin, cytoplasmic 1;                         | -1.12                           | 0.10                  | 29.70                | -1.74 |
| SGDGVTHTVP | IYEGYALPHAILR         | ACTB_HUMAN  | ACTBL_HUMAN | ACTG_HUMAN  | Actin, cytoplasmic 1;                         | -1.20                           | 0.06                  | 42.70                | -1.48 |
| MATVASSSSL | EKSYELPDGQVITIGNER    | ACTB_HUMAN  | ACTA_HUMAN  | ACTBM_HUMAN | Actin, cytoplasmic 1;                         | -1.25                           | 0.06                  | 44.00                | -2.99 |
| DGVTHTVPIY | EGYALPHAILR           | ACTB_HUMAN  | ACTBL_HUMAN | ACTG_HUMAN  | Actin, cytoplasmic 1;                         | -1.44                           | 0.08                  | 30.60                | 0.39  |
| NVPAMYVAIQ | AVLSLYASGR            | ACTB_HUMAN  | ACTA_HUMAN  | ACTBL_HUMAN | Actin, cytoplasmic 1;                         | -1.66                           | 0.05                  | 29.00                | -7.19 |
| ISLNPEQWSQ | LKEQISDIDDAVR         | TCP4_HUMAN  |             |             | Activated RNA polymerase II                   | 1.62                            | 0.11                  | 38.80                | -5.45 |
| PASASQVAGI | TGVSDAYSQSLPGK        | ASCC1_HUMAN |             |             | Activating signal                             | 0.92                            | 0.03                  | 26.70                | -3.09 |
| PRWIVEERAD | ATNVNWHWTER           | AHSA1_HUMAN |             |             | Activator of 90 kDa heat shock protein ATPase | -0.76                           | 0.05                  | 28.40                | -2.37 |
| GRVTQLCRQY | SDMPPLTLEGIQDR        | ACPM_HUMAN  |             |             | Acyl carrier protein,                         | -0.44                           | 0.02                  | 67.60                | 4.36  |
| GQIRVPARM  | AATLILEPAGR           | ACOT1_HUMAN | ACOT2_HUMAN |             | Acyl-coenzyme A                               | 1.21                            | 0.05                  | 37.80                | -3.33 |
| MER        | QVLLSEPEEAAALYR       | ACPH_HUMAN  |             |             | Acylamino-acid-releasing enzyme;              | 4.85                            | 0.78                  | 55.10                | 2.27  |
| AESFFQTKAL | DVSASDDEIAR           | ACPH_HUMAN  |             |             | Acylamino-acid-releasing enzyme;              | 1.55                            | 0.12                  | 44.20                | -3.79 |
| GCDGILGSGR | RPDGCVCVCGDDSTCR      | ATL4_HUMAN  |             |             | ADAMTS-like protein 4;                        | 4.53                            | 0.44                  | 52.50                | -0.61 |
| MSDKLPYK   | VADIGLAAWGR           | SAHH_HUMAN  |             |             | Adenosylhomocysteinase;                       | -0.04                           | 0.00                  | 43.00                | -2.51 |
| DIGLAAWGRK | ALDIAENEMPGLMR        | SAHH_HUMAN  |             |             | Adenosylhomocysteinase;                       | -0.12                           | 0.01                  | 43.60                | -1.51 |
| GAGKGTQAPR | LAENFCVCHLATGDMLR     | KAD2_HUMAN  |             |             | Adenylate kinase 2,                           | 3.45                            | 0.31                  | 46.50                | -4.42 |

Table S5

| Non-prime  | Prime                    | Id 1        | Id 2 | Id 3 | Protein (Id1)                            | Fold-change (log <sub>2</sub> ) | Fc standard deviation | X! Tandem hyperscore | ppm   |
|------------|--------------------------|-------------|------|------|------------------------------------------|---------------------------------|-----------------------|----------------------|-------|
| M          | APSVPAAEPEYPKGIR         | KAD2_HUMAN  |      |      | Adenylate kinase 2, mitochondrial;       | 0.38                            | 0.02                  | 27.00                | -1.26 |
| IKKRLETYYK | ATEPVIAFYEKR             | KAD1_HUMAN  |      |      | Adenylate kinase                         | 0.23                            | 0.01                  | 22.80                | -2.88 |
| GSLAFLGADT | ARLDVASEFR               | ADML_HUMAN  |      |      | ADM;                                     | -0.39                           | 0.02                  | 41.60                | -4.52 |
| RKFQATGSRP | AGEEDAGGPERPGDVVNVVVFVDR | ADXL_HUMAN  |      |      | Adrenodoxin-like protein, mitochondrial; | 0.11                            | 0.01                  | 49.30                | 0.04  |
| GFTCSCPAGR | GGAVCEKVLGAPVPAFEGR      | AGRIN_HUMAN |      |      | Agurin;                                  | 6.44                            | 0.68                  | 45.40                | 0.36  |
| KSELFGETAR | SIESTLDDLFR              | AGRIN_HUMAN |      |      | Agurin;                                  | 5.51                            | 0.89                  | 51.50                | -1.89 |
| TCSFGSTCAR | SADGLTASCLCPATCR         | AGRIN_HUMAN |      |      | Agurin;                                  | 4.84                            | 0.57                  | 36.50                | 4.92  |
| RVGPTCADEK | SPCQPNPCHGAAPCR          | AGRIN_HUMAN |      |      | Agurin;                                  | 4.77                            | 0.30                  | 38.40                | -4.95 |
| ASCLCPATCR | GAPEGTVCGSDGADYPGECQLLR  | AGRIN_HUMAN |      |      | Agurin;                                  | 4.65                            | 0.70                  | 66.00                | -0.94 |
| RDLGPGKSVR | AIVDVHFDPTTAFR           | AGRIN_HUMAN |      |      | Agurin;                                  | 4.46                            | 0.23                  | 34.40                | -1.17 |
| LLRPESCPAR | QAPVCGDDGVTYENDCVMGR     | AGRIN_HUMAN |      |      | Agurin;                                  | 4.46                            | 0.49                  | 65.00                | -1.89 |
| CSAGQCVCPR | CEHPPPGVCGSDGVTYGSACELR  | AGRIN_HUMAN |      |      | Agurin;                                  | 4.09                            | 0.37                  | 55.90                | -0.61 |
| RGRPRCSCDR | VTCDGAYRPVCAQDGR         | AGRIN_HUMAN |      |      | Agurin;                                  | 3.61                            | 0.33                  | 35.10                | -2.53 |
| GAPDFSKLAR | AAAVSSGFDGAIQLVSLGGR     | AGRIN_HUMAN |      |      | Agurin;                                  | 3.59                            | 0.35                  | 85.70                | 5.41  |
| AIQLVSLGGR | QLLTPEHVLR               | AGRIN_HUMAN |      |      | Agurin;                                  | 3.13                            | 0.12                  | 26.70                | -0.89 |
| PKCGQCPDGR | ALGPAGCEADASAPATCAEMR    | AGRIN_HUMAN |      |      | Agurin;                                  | 3.06                            | 0.24                  | 89.80                | 0.75  |
| DLGKGAAVIR | SREPVTLGAWTR             | AGRIN_HUMAN |      |      | Agurin;                                  | 2.99                            | 0.16                  | 45.10                | -0.57 |
| IRLLDVNNQR | LELGIGPGAATR             | AGRIN_HUMAN |      |      | Agurin;                                  | 2.95                            | 0.20                  | 45.50                | -2.20 |
| VTYGSACELR | EAACLQQTQIEEAR           | AGRIN_HUMAN |      |      | Agurin;                                  | 2.82                            | 0.33                  | 80.90                | 0.48  |
| ASCLCPATCR | GAPEGTVCGSDGADYPGECQLLR  | AGRIN_HUMAN |      |      | Agurin;                                  | 2.71                            | 0.17                  | 21.50                | -1.77 |
| QLLTPEHVLR | QVDVTSFAGHPCTR           | AGRIN_HUMAN |      |      | Agurin;                                  | 2.00                            | 0.14                  | 32.10                | -3.93 |
| FYTPEMADPK | SELFGETAR                | AGRIN_HUMAN |      |      | Agurin;                                  | 1.68                            | 0.05                  | 27.40                | -3.08 |

Table S5

| Non-prime  | Prime                  | Id 1        | Id 2       | Id 3 | Protein (Id1)                         | Fold-change (log <sub>2</sub> ) | Fc standard deviation | X! Tandem hyperscore | ppm   |
|------------|------------------------|-------------|------------|------|---------------------------------------|---------------------------------|-----------------------|----------------------|-------|
| NPCHGAAPCR | VLPEGGAQCECPLGR        | AGRIN_HUMAN |            |      | Agrin;                                | 1.40                            | 0.13                  | 62.00                | -1.37 |
| GVGECGDHPC | LPNPCHGGAPCQNLEAGR     | AGRIN_HUMAN |            |      | Agrin;                                | 0.20                            | 0.01                  | 25.20                | -1.56 |
| ELFGETARSI | ESTLDDLFR              | AGRIN_HUMAN |            |      | Agrin;                                | 0.06                            | 0.00                  | 33.10                | -3.45 |
| YNGNARGKDF | LALALLDGR              | AGRIN_HUMAN |            |      | Agrin;                                | 0.04                            | 0.00                  | 43.10                | -1.55 |
| ALAIVDGHLQ | LSYNLGSQPVVLR          | AGRIN_HUMAN |            |      | Agrin;                                | 0.04                            | 0.00                  | 35.50                | -4.79 |
| LYNGQKTDGK | GDFVSLALR              | AGRIN_HUMAN |            |      | Agrin;                                | -0.32                           | 0.01                  | 36.90                | -5.83 |
| NVFKKFDGPC | DPCQGALPDPSR           | AGRIN_HUMAN |            |      | Agrin;                                | -0.60                           | 0.02                  | 48.70                | -1.93 |
| SYNLGSQPVV | LRSTVPVNTNR            | AGRIN_HUMAN |            |      | Agrin;                                | -0.73                           | 0.07                  | 30.50                | -0.93 |
| PHCEKGLVEK | SAGDVDTLAFDGR          | AGRIN_HUMAN |            |      | Agrin;                                | -2.66                           | 0.17                  | 60.40                | -1.47 |
| AAAKAIQGLR | AVFDETYDPVPR           | SYAC_HUMAN  |            |      | Alanine--tRNA ligase, cytoplasmic;    | 2.36                            | 0.31                  | 33.30                | -2.36 |
| GSPDRPWAKP | EDPSLLEDPR             | ALDR_HUMAN  |            |      | Aldose reductase;                     | -2.08                           | 0.09                  | 26.80                | 0.08  |
| ESESGSPEYR | QQSAVPLDEETHAGEDVAVFAR | PPB1_HUMAN  |            |      | Alkaline phosphatase, placental type; | 2.92                            | 0.28                  | 52.90                | -2.54 |
| LGLRLQLSLG | IIPVEEENPDFWNR         | PPB1_HUMAN  | PPBN_HUMAN |      | Alkaline phosphatase,                 | 0.57                            | 0.05                  | 72.30                | -2.35 |
| YGNPGYVLK  | DGARPDVTESESGSPEYR     | PPB1_HUMAN  | PPBN_HUMAN |      | Alkaline phosphatase, placental type; | -0.04                           | 0.00                  | 33.50                | 1.26  |
| QLSLGIIPVE | EENPDFWNR              | PPB1_HUMAN  | PPBN_HUMAN |      | Alkaline phosphatase, placental type; | -0.60                           | 0.03                  | 30.50                | 0.89  |
| GYVLKDGARP | DVTESESGSPEYR          | PPB1_HUMAN  | PPBN_HUMAN |      | Alkaline phosphatase, placental type; | -0.63                           | 0.06                  | 47.90                | -0.81 |
| ESESGSPEYR | QQSAVPLDGETHAGEDVAVFAR | PPBN_HUMAN  |            |      | Alkaline phosphatase, placental-like; | 2.03                            | 0.14                  | 33.90                | -1.80 |

Table S5

| Non-prime  | Prime                | Id 1        | Id 2        | Id 3        | Protein (Id1)             | Fold-change (log <sub>2</sub> ) | Fc standard deviation | X! Tandem hyperscore | ppm   |
|------------|----------------------|-------------|-------------|-------------|---------------------------|---------------------------------|-----------------------|----------------------|-------|
| AAGFCPAVLC | HPNSPLDEENLTQENQDR   | AACT_HUMAN  |             |             | Alpha-1-antichymotrypsin; | 1.23                            | 0.07                  | 86.30                | -1.89 |
| LFFWTRPAPG | RPPSVSALDGD PASLTR   | MGAT1_HUMAN |             |             | Alpha-1,3-mannosyl-       | -0.82                           | 0.06                  | 33.60                | -0.17 |
| ILTLVVAACG | FVLWSSNGR            | MGAT2_HUMAN |             |             | Alpha-1,6-mannosyl-       | 1.09                            | 0.03                  | 30.80                | -2.01 |
| DGKFSVVYAK | CDSSPDSAEDVR         | FETUA_HUMAN |             |             | Alpha-2-HS-glycoprotein;  | 4.57                            | 0.16                  | 59.50                | -0.44 |
| GKFSVVYAKC | DSSPDSAEDVR          | FETUA_HUMAN |             |             | Alpha-2-HS-glycoprotein;  | -1.00                           | 0.02                  | 52.10                | -2.23 |
| WEQLLTTIAR | TINEVENQILTR         | ACTN1_HUMAN | ACTN4_HUMAN |             | Alpha-actinin-1;          | 4.28                            | 0.39                  | 72.20                | -2.67 |
| NFITAEELRR | ELPPDQAEYCIAR        | ACTN1_HUMAN | ACTN4_HUMAN |             | Alpha-actinin-1;          | 4.21                            | 0.27                  | 27.10                | 0.69  |
| DPAWEKQQRK | TFTAWCN SHLR         | ACTN1_HUMAN | ACTN2_HUMAN | ACTN3_HUMAN | Alpha-actinin-1;          | 2.74                            | 0.27                  | 27.80                | 0.28  |
| KNFITAEELR | RELPPDQAEYCIAR       | ACTN1_HUMAN | ACTN4_HUMAN |             | Alpha-actinin-1;          | 1.79                            | 0.05                  | 43.00                | -0.69 |
| HTNYTMEHIR | VGWEQLLTTIAR         | ACTN1_HUMAN | ACTN4_HUMAN |             | Alpha-actinin-1;          | 1.47                            | 0.12                  | 49.00                | 4.10  |
| NEHLMEDYEK | LASDLLEWIR           | ACTN1_HUMAN | ACTN4_HUMAN |             | Alpha-actinin-1;          | 1.25                            | 0.11                  | 36.10                | -0.08 |
| QLLTTIARTI | NEVENQILTR           | ACTN1_HUMAN | ACTN4_HUMAN |             | Alpha-actinin-1;          | 0.74                            | 0.05                  | 28.10                | -2.00 |
| MDHYD      | SQQTNDYMQPEEDWDR     | ACTN1_HUMAN |             |             | Alpha-actinin-1;          | 0.41                            | 0.04                  | 70.80                | -0.77 |
| YTMEHIRVGV | EQLLTTIAR            | ACTN1_HUMAN | ACTN4_HUMAN |             | Alpha-actinin-1;          | 0.32                            | 0.02                  | 34.50                | -1.57 |
| HLEQAEKGYE | EWLLNEIR             | ACTN1_HUMAN | ACTN2_HUMAN | ACTN4_HUMAN | Alpha-actinin-1;          | -0.04                           | 0.00                  | 25.80                | -1.26 |
| QHLEQAEKGY | EEWLLNEIR            | ACTN1_HUMAN | ACTN2_HUMAN | ACTN4_HUMAN | Alpha-actinin-1;          | -0.23                           | 0.02                  | 40.90                | 2.18  |
| TLGPEEFKAC | LISLGYDIGNDPQGAEAFAR | ACTN1_HUMAN |             |             | Alpha-actinin-1;          | -0.29                           | 0.02                  | 54.10                | -2.18 |
| EIGRISIEMH | GTLEDQLSHLR          | ACTN1_HUMAN |             |             | Alpha-actinin-1;          | -0.34                           | 0.03                  | 33.50                | 2.38  |
| TNYTMEHIRV | GWEQLLTTIAR          | ACTN1_HUMAN | ACTN4_HUMAN |             | Alpha-actinin-1;          | -0.52                           | 0.05                  | 48.20                | -2.80 |
| VGWEQLLTTI | ARTINEVENQILTR       | ACTN1_HUMAN | ACTN4_HUMAN |             | Alpha-actinin-1;          | -0.73                           | 0.05                  | 35.10                | -3.19 |

Table S5

| Non-prime  | Prime                 | Id 1        | Id 2        | Id 3       | Protein (Id1)    | Fold-change (log <sub>2</sub> ) | Fc standard deviation | X! Tandem hyperscore | ppm   |
|------------|-----------------------|-------------|-------------|------------|------------------|---------------------------------|-----------------------|----------------------|-------|
| DGKEAMLKHR | DYETATLSDIKALIR       | ACTN4_HUMAN |             |            | Alpha-actinin-4; | 3.25                            | 0.41                  | 46.00                | -3.17 |
| NEVENQILTR | DAKGISQEQMQEFR        | ACTN4_HUMAN |             |            | Alpha-actinin-4; | 2.00                            | 0.09                  | 37.10                | -4.64 |
| KEAMLKHRDY | ETATLSDIKALIR         | ACTN4_HUMAN |             |            | Alpha-actinin-4; | 0.34                            | 0.03                  | 20.40                | -0.33 |
| LAAHQDRVEQ | IAAIAQELNELDYDShNVNTR | ACTN4_HUMAN |             |            | Alpha-actinin-4; | 0.31                            | 0.02                  | 46.90                | 0.81  |
| RVEQIAAIAQ | ELNELDYDShNVNTR       | ACTN4_HUMAN |             |            | Alpha-actinin-4; | 0.26                            | 0.01                  | 51.80                | -0.84 |
| NVNTRCQKIC | DQWDALGSLTHSR         | ACTN4_HUMAN |             |            | Alpha-actinin-4; | -0.18                           | 0.02                  | 51.10                | -0.39 |
| EQIAAIAQEL | NELDYDShNVNTR         | ACTN4_HUMAN |             |            | Alpha-actinin-4; | -0.47                           | 0.05                  | 29.50                | -1.13 |
| AAHQDRVEQI | AAIAQELNELDYDShNVNTR  | ACTN4_HUMAN |             |            | Alpha-actinin-4; | -0.63                           | 0.07                  | 62.50                | -4.85 |
| NIQNFTTSWR | DGLAFNALIHR           | ACTN4_HUMAN | SPTN4_HUMAN |            | Alpha-actinin-4; | -1.04                           | 0.09                  | 58.60                | 0.71  |
| QDRVEQIAAI | AQELNELDYDShNVNTR     | ACTN4_HUMAN |             |            | Alpha-actinin-4; | -1.08                           | 0.09                  | 60.10                | -1.85 |
| DLYTAKGLFR | AAVPSGASTGIYEALER     | ENOA_HUMAN  | ENOB_HUMAN  | ENOG_HUMAN | Alpha-enolase;   | 2.22                            | 0.12                  | 97.70                | -1.25 |
| FRAAVPSGAS | TGIYEALER             | ENOA_HUMAN  | ENOB_HUMAN  | ENOG_HUMAN | Alpha-enolase;   | -0.08                           | 0.00                  | 29.10                | 0.75  |
| WQKFTASAGI | QVVGDDLTVTNPKR        | ENOA_HUMAN  |             |            | Alpha-enolase;   | -0.29                           | 0.02                  | 41.30                | -4.16 |
| VDLYTAKGLF | RAAVPSGASTGIYEALER    | ENOA_HUMAN  | ENOB_HUMAN  | ENOG_HUMAN | Alpha-enolase;   | -0.34                           | 0.02                  | 58.70                | -1.55 |
| AKGLFRAAVP | SGASTGIYEALER         | ENOA_HUMAN  | ENOB_HUMAN  | ENOG_HUMAN | Alpha-enolase;   | -0.52                           | 0.03                  | 60.00                | -1.80 |
| QDDWGAWQKF | TASAGIQVVGDDLTVTNPKR  | ENOA_HUMAN  |             |            | Alpha-enolase;   | -0.66                           | 0.05                  | 41.50                | 0.38  |
| HAGNKLAMQE | FMILPVGAANFR          | ENOA_HUMAN  |             |            | Alpha-enolase;   | -0.79                           | 0.03                  | 43.70                | -1.75 |
| DDWGAWQKFT | ASAGIQVVGDDLTVTNPKR   | ENOA_HUMAN  |             |            | Alpha-enolase;   | -0.82                           | 0.04                  | 37.40                | -1.60 |
| AGNKLAMQEF | MILPVGAANFR           | ENOA_HUMAN  |             |            | Alpha-enolase;   | -0.82                           | 0.06                  | 37.90                | -1.81 |
| YTDKVVIGMD | VAASEFFR              | ENOA_HUMAN  |             |            | Alpha-enolase;   | -1.29                           | 0.06                  | 23.60                | -1.57 |
| KAGYTDKVVV | GMDVAASEFFR           | ENOA_HUMAN  |             |            | Alpha-enolase;   | -1.44                           | 0.12                  | 55.50                | -2.45 |
| AVPSGASTGI | YEALER                | ENOA_HUMAN  | ENOB_HUMAN  | ENOG_HUMAN | Alpha-enolase;   | -1.44                           | 0.08                  | 26.70                | -1.83 |
| GYTDKVVIGM | DVAASEFFR             | ENOA_HUMAN  |             |            | Alpha-enolase;   | -1.49                           | 0.08                  | 40.70                | -2.71 |
| LSTYCVDNQ  | GGPGEDGAQGEPAEPEDAESR | TXLNA_HUMAN |             |            | Alpha-taxilin;   | 0.20                            | 0.01                  | 56.10                | -4.15 |

Table S5

| Non-prime  | Prime                    | Id 1        | Id 2 | Id 3 | Protein (Id1)            | Fold-change (log <sub>2</sub> ) | Fc standard deviation | X! Tandem hyperscore | ppm   |
|------------|--------------------------|-------------|------|------|--------------------------|---------------------------------|-----------------------|----------------------|-------|
| TRSLAESELR | SAPYEFPEESPIEQLEER       | AMPD2_HUMAN |      |      | AMP deaminase 2;         | 0.06                            | 0.00                  | 56.00                | 0.87  |
| TTESVEEVVR | EVCSEQAETGPCR            | A4_HUMAN    |      |      | Amyloid beta A4 protein; | 8.32                            | 1.54                  | 45.40                | 0.90  |
| LAAWTARALE | VPTDGNAGLLAEPQIAMFCGR    | A4_HUMAN    |      |      | Amyloid beta A4 protein; | 3.75                            | 0.21                  | 53.00                | 2.04  |
| LLAAWTARAL | EVPTDGNAGLLAEPQIAMFCGR   | A4_HUMAN    |      |      | Amyloid beta A4 protein; | 1.23                            | 0.10                  | 107.00               | -1.85 |
| LEVPTDGNAG | LLAEPQIAMFCGR            | A4_HUMAN    |      |      | Amyloid beta A4 protein; | 0.84                            | 0.05                  | 47.30                | 0.20  |
| LLLAAWTARA | LEVPTDGNAGLLAEPQIAMFCGR  | A4_HUMAN    |      |      | Amyloid beta A4 protein; | 0.42                            | 0.07                  | 113.00               | -1.41 |
| LQPWHSFGAD | SVPANTENEVEPVDARPAADR    | A4_HUMAN    |      |      | Amyloid beta A4 protein; | 0.29                            | 0.02                  | 33.60                | 0.00  |
| SFGADSVPAN | TENEVEPVDARPAADR         | A4_HUMAN    |      |      | Amyloid beta A4 protein; | 0.18                            | 0.02                  | 31.80                | 0.33  |
| ADSVPANTEN | EVEPVDARPAADR            | A4_HUMAN    |      |      | Amyloid beta A4 protein; | 0.06                            | 0.00                  | 27.60                | -3.23 |
| DDLQPWHSFG | ADSVPANTENEVEPVDARPAADR  | A4_HUMAN    |      |      | Amyloid beta A4 protein; | -0.10                           | 0.01                  | 41.00                | -2.80 |
| RALEVPTDGN | AGLLAEPQIAMFCGR          | A4_HUMAN    |      |      | Amyloid beta A4 protein; | -0.20                           | 0.01                  | 46.50                | -1.02 |
| WHSFGADSV  | ANTENEVEPVDARPAADR       | A4_HUMAN    |      |      | Amyloid beta A4 protein; | -0.25                           | 0.03                  | 40.80                | -2.16 |
| SLDDLQPWHS | FGADSVPANTENEVEPVDARPAAL | A4_HUMAN    |      |      | Amyloid beta A4 protein; | -0.25                           | 0.03                  | 48.20                | -1.80 |
| FGADSVPANT | ENEVEPVDARPAADR          | A4_HUMAN    |      |      | Amyloid beta A4 protein; | -0.58                           | 0.05                  | 30.30                | -0.94 |
| KAVIQHFQEK | VESLEQEAAANER            | A4_HUMAN    |      |      | Amyloid beta A4 protein; | -1.08                           | 0.11                  | 50.90                | -3.13 |
| TTTTESVEEV | VREVCSEQAETGPCR          | A4_HUMAN    |      |      | Amyloid beta A4 protein; | -1.20                           | 0.14                  | 61.20                | -2.87 |
| FPFHSSEIQR | DELAPAGTGVS              | APLP1_HUMAN |      |      | Amyloid-like protein 1;  | -0.02                           | 0.00                  | 37.20                | -9.52 |
| LLLRAQPAIG | SLAGGSPGAAEAPGSAQVAGLCGF | APLP1_HUMAN |      |      | Amyloid-like protein 1;  | -0.39                           | 0.04                  | 47.50                | 0.14  |
| QNVREEPVQ  | FNSGTLALNR               | TIE2_HUMAN  |      |      | Angiopoietin-1 receptor; | 0.42                            | 0.01                  | 24.80                | -2.94 |
| ALLSLAKGDR | SEDFGVNEDLADSDAR         | ANXA1_HUMAN |      |      | Annexin A1;              | 3.03                            | 0.31                  | 72.60                | -1.75 |
| NEDLADSDAR | ALYEAGER                 | ANXA1_HUMAN |      |      | Annexin A1;              | 2.99                            | 0.11                  | 33.40                | -0.75 |

Table S5

| Non-prime  | Prime               | Id 1        | Id 2 | Id 3 | Protein (Id1) | Fold-change (log <sub>2</sub> ) | Fc standard deviation | X! Tandem hyperscore | ppm   |
|------------|---------------------|-------------|------|------|---------------|---------------------------------|-----------------------|----------------------|-------|
| LEEVVLALLK | TPAQFDADEL          | ANXA1_HUMAN |      |      | Annexin A1;   | 2.83                            | 0.37                  | 54.10                | 0.85  |
| AALHKAIMVK | GVDEATHIDILTKR      | ANXA1_HUMAN |      |      | Annexin A1;   | 1.83                            | 0.24                  | 26.20                | -2.81 |
| FRNALLSLAK | GDRSEDFGVNEDLADSDAR | ANXA1_HUMAN |      |      | Annexin A1;   | 1.66                            | 0.19                  | 89.50                | -0.24 |
| NRVYREELKR | DLAKDITSDTSGDFR     | ANXA1_HUMAN |      |      | Annexin A1;   | 1.34                            | 0.12                  | 44.30                | -2.71 |
| RALYEAGERR | KGTDVNVFNTILTTR     | ANXA1_HUMAN |      |      | Annexin A1;   | 1.22                            | 0.27                  | 40.90                | -1.14 |
| ELRAAMKGLG | TDEDTLIEILASR       | ANXA1_HUMAN |      |      | Annexin A1;   | 0.51                            | 0.05                  | 67.30                | -3.12 |
| LAKGDRSEDF | GVNEDLADSDAR        | ANXA1_HUMAN |      |      | Annexin A1;   | 0.38                            | 0.02                  | 55.70                | -0.31 |
| DADELRAAMK | GLGTDEDTLIEILASR    | ANXA1_HUMAN |      |      | Annexin A1;   | 0.16                            | 0.02                  | 95.30                | -0.69 |
| AGERRKGTDV | NVFNILTTR           | ANXA1_HUMAN |      |      | Annexin A1;   | -0.10                           | 0.01                  | 32.30                | -2.07 |
| REELKRDLAK | DITSDTSGDFR         | ANXA1_HUMAN |      |      | Annexin A1;   | -0.18                           | 0.01                  | 49.00                | -1.21 |
| KALTGHLEEV | VLALLKTPAQFDADEL    | ANXA1_HUMAN |      |      | Annexin A1;   | -0.27                           | 0.01                  | 32.40                | 2.20  |
| YEAGERRKGT | DVNVFNILTTR         | ANXA1_HUMAN |      |      | Annexin A1;   | -0.34                           | 0.04                  | 46.60                | -1.75 |
| HKAIMVKGVD | EATHIDILTKR         | ANXA1_HUMAN |      |      | Annexin A1;   | -0.44                           | 0.03                  | 26.40                | -3.50 |
| NALLSLAKGD | RSEDFGVNEDLADSDAR   | ANXA1_HUMAN |      |      | Annexin A1;   | -0.52                           | 0.05                  | 67.20                | -0.72 |
| LSLAKGDRSE | DFGVNEDLADSDAR      | ANXA1_HUMAN |      |      | Annexin A1;   | -0.58                           | 0.06                  | 71.70                | -2.82 |
| LLSLAKGDRS | EDFGVNEDLADSDAR     | ANXA1_HUMAN |      |      | Annexin A1;   | -0.69                           | 0.07                  | 85.40                | -4.27 |
| RAAMKGLGTD | EDTLIEILASR         | ANXA1_HUMAN |      |      | Annexin A1;   | -0.69                           | 0.07                  | 51.80                | -0.46 |
| AMKGLGTDED | TLIEILASR           | ANXA1_HUMAN |      |      | Annexin A1;   | -0.86                           | 0.08                  | 36.90                | -4.57 |
| AAMKGLGTDE | DTLIEILASR          | ANXA1_HUMAN |      |      | Annexin A1;   | -0.89                           | 0.08                  | 51.20                | -1.72 |
| LHKAIMVKGV | DEATHIDILTKR        | ANXA1_HUMAN |      |      | Annexin A1;   | -0.96                           | 0.11                  | 34.20                | -4.46 |

Table S5

| Non-prime  | Prime              | Id 1        | Id 2        | Id 3 | Protein (Id1) | Fold-change (log <sub>2</sub> ) | Fc standard deviation | X! Tandem hyperscore | ppm   |
|------------|--------------------|-------------|-------------|------|---------------|---------------------------------|-----------------------|----------------------|-------|
| LRAAMKGLGT | DEDTLIEILASR       | ANXA1_HUMAN |             |      | Annexin A1;   | -1.00                           | 0.16                  | 63.80                | -0.99 |
| KAIMVKGVDE | ATIIDLTKR          | ANXA1_HUMAN |             |      | Annexin A1;   | -1.08                           | 0.09                  | 25.70                | 0.17  |
| DELRAAMKGL | GTDEDTLIEILASR     | ANXA1_HUMAN |             |      | Annexin A1;   | -1.20                           | 0.17                  | 72.20                | -2.30 |
| SLAKGDRSED | FGVNEDLADSDAR      | ANXA1_HUMAN |             |      | Annexin A1;   | -1.29                           | 0.16                  | 50.90                | -0.35 |
| KASMKGLGTD | EDSLIEIICSR        | ANXA2_HUMAN | AXA2L_HUMAN |      | Annexin A2;   | 4.29                            | 0.28                  | 48.00                | -3.21 |
| DSLIEIICSR | TNQLQEINR          | ANXA2_HUMAN | AXA2L_HUMAN |      | Annexin A2;   | 3.60                            | 0.29                  | 51.30                | -2.12 |
| KLMVALAKGR | RAEDGSVIDYELIDQDAR | ANXA2_HUMAN |             |      | Annexin A2;   | 3.60                            | 0.30                  | 80.40                | 0.05  |
| VTIVNILTNR | SNAQRQDIAFAYQR     | ANXA2_HUMAN |             |      | Annexin A2;   | 3.24                            | 0.19                  | 37.60                | -0.35 |
| LNIETAIKTK | GVDEVTVNILTNR      | ANXA2_HUMAN |             |      | Annexin A2;   | 2.05                            | 0.17                  | 67.90                | 1.21  |
| DASELKASMK | GLGTDEDSLIEIICSR   | ANXA2_HUMAN | AXA2L_HUMAN |      | Annexin A2;   | 0.24                            | 0.03                  | 81.80                | -0.50 |
| ILTNRSNAQR | QDIAFAYQR          | ANXA2_HUMAN |             |      | Annexin A2;   | -0.29                           | 0.01                  | 42.60                | -1.32 |
| KEMYKTDLEK | DIISDTSGDFR        | ANXA2_HUMAN | AXA2L_HUMAN |      | Annexin A2;   | -0.32                           | 0.02                  | 44.70                | -3.83 |
| KGRRAEDGSV | IDYELIDQDAR        | ANXA2_HUMAN |             |      | Annexin A2;   | -0.44                           | 0.03                  | 50.60                | -0.58 |
| INRVYKEMYK | TDLEKDIISDTSGDFR   | ANXA2_HUMAN | AXA2L_HUMAN |      | Annexin A2;   | -0.49                           | 0.04                  | 45.60                | -0.48 |
| NRVYKEMYKT | DLEKDIISDTSGDFR    | ANXA2_HUMAN | AXA2L_HUMAN |      | Annexin A2;   | -0.52                           | 0.05                  | 43.60                | -2.64 |
| RAEDGSVIDY | ELIDQDAR           | ANXA2_HUMAN |             |      | Annexin A2;   | -0.55                           | 0.02                  | 30.70                | -2.71 |
| AKGRRAEDGS | VIDYELIDQDAR       | ANXA2_HUMAN |             |      | Annexin A2;   | -0.58                           | 0.04                  | 47.10                | -3.10 |
| RRAEDGSVID | YELIDQDAR          | ANXA2_HUMAN |             |      | Annexin A2;   | -0.96                           | 0.04                  | 29.50                | -2.94 |
| SMKGLGTDED | SLIEIICSR          | ANXA2_HUMAN | AXA2L_HUMAN |      | Annexin A2;   | -1.20                           | 0.06                  | 34.50                | -4.44 |



Table S5

| Non-prime   | Prime                   | Id 1        | Id 2        | Id 3 | Protein (Id1)                         | Fold-change (log <sub>2</sub> ) | Fc standard deviation | X! Tandem hyperscore | ppm   |
|-------------|-------------------------|-------------|-------------|------|---------------------------------------|---------------------------------|-----------------------|----------------------|-------|
| ASMKGLGTDE  | DSLIEIICSR              | ANXA2_HUMAN | AXA2L_HUMAN |      | Annexin A2;                           | -1.25                           | 0.12                  | 36.90                | -7.98 |
| TPPSAYGSVK  | AYTNFDAER               | ANXA2_HUMAN | AXA2L_HUMAN |      | Annexin A2;                           | -1.39                           | 0.04                  | 23.80                | -6.78 |
| SELKASMKGL  | GTDEDSLIEIICSR          | ANXA2_HUMAN | AXA2L_HUMAN |      | Annexin A2;                           | -1.39                           | 0.11                  | 55.90                | 6.70  |
| GRRRAEDGSVI | DYELIDQDAR              | ANXA2_HUMAN |             |      | Annexin A2;                           | -1.44                           | 0.08                  | 44.80                | -3.54 |
| LKASMKGLGT  | DEDSLIEIICSR            | ANXA2_HUMAN | AXA2L_HUMAN |      | Annexin A2;                           | -1.49                           | 0.13                  | 48.10                | 3.70  |
| IETAIKTKGV  | DEVTIVNILTNR            | ANXA2_HUMAN |             |      | Annexin A2;                           | -2.25                           | 0.32                  | 35.60                | 1.19  |
| HTLIRVMVSR  | SEIDLFNIR               | ANXA5_HUMAN |             |      | Annexin A5;                           | 1.53                            | 0.07                  | 40.90                | -3.08 |
| DAETLRKAMK  | GLGTDEESILLLLTSR        | ANXA5_HUMAN |             |      | Annexin A5;                           | 0.45                            | 0.06                  | 91.00                | -1.49 |
| MAQVLR      | GTVTDFPGFDER            | ANXA5_HUMAN |             |      | Annexin A5;                           | -3.25                           | 0.00                  | 41.10                | -2.04 |
| GKTTKMPCES  | SPPEADTPTSTR            | KI67_HUMAN  |             |      | Antigen KI-67;                        | 1.45                            | 0.04                  | 37.20                | -3.20 |
| EKAQALDLA   | GFKELFQTR               | KI67_HUMAN  |             |      | Antigen KI-67;                        | 0.96                            | 0.06                  | 27.40                | 1.61  |
| AGKTTKMPCE  | SSPPESADTPTSTR          | KI67_HUMAN  |             |      | Antigen KI-67;                        | 0.84                            | 0.04                  | 30.90                | 3.27  |
| YMKHATKTAK  | DALSSVQESQVAQQAR        | APOC3_HUMAN |             |      | Apolipoprotein C-III;                 | -0.10                           | 0.01                  | 76.80                | 0.69  |
| RKISVVSATK  | GVPAGNSDTEGGQPGR        | ACINU_HUMAN |             |      | Apoptotic chromatin                   | 0.72                            | 0.04                  | 42.40                | 2.22  |
| RRSSRVRQAR  | AAKLSEGSQPAEEEEEDQETPSR | ACINU_HUMAN |             |      | Apoptotic chromatin                   | 0.60                            | 0.04                  | 54.20                | -1.91 |
| LTRRSISQQK  | SGVSITIDDPVR            | ACINU_HUMAN |             |      | Apoptotic chromatin                   | -0.14                           | 0.01                  | 43.10                | -3.25 |
| SFKRKISVVS  | ATKGVPAAGNSDTEGGQPGR    | ACINU_HUMAN |             |      | Apoptotic chromatin                   | -0.20                           | 0.02                  | 63.10                | 0.00  |
| LSDLHLLQSL  | MAQSCSSALR              | AQ12A_HUMAN | AQ12B_HUMAN |      | Aquaporin-12A;                        | 3.32                            | 0.50                  | 28.00                | 6.14  |
| VWPGDGLVPD  | TAEPHVAPSPTLPSTEDVIR    | GIT2_HUMAN  |             |      | ARF GTPase-activating                 | -0.39                           | 0.02                  | 36.30                | -1.49 |
| VKVPGRKLR   | ATPATAPGTSR             | AGAP3_HUMAN |             |      | Arf-GAP with GTPase,                  | 0.57                            | 0.02                  | 34.80                | 5.42  |
| M           | VLAELYVSDR              | SYNC_HUMAN  |             |      | Asparagine--tRNA ligase, cytoplasmic; | -2.79                           | 0.19                  | 25.60                | -2.18 |

Table S5

| Non-prime   | Prime                 | Id 1        | Id 2        | Id 3 | Protein (Id1)                               | Fold-change (log <sub>2</sub> ) | Fc standard deviation | X! Tandem hyperscore | ppm   |
|-------------|-----------------------|-------------|-------------|------|---------------------------------------------|---------------------------------|-----------------------|----------------------|-------|
| KEFNPTKPLL  | SVNKSTSTPTSPGPR       | ATX2L_HUMAN |             |      | Ataxin-2-like protein;                      | 1.54                            | 0.14                  | 31.10                | -2.61 |
| APQPPPQQH   | QERPGAAAIGSAR         | ATX2L_HUMAN |             |      | Ataxin-2-like protein;                      | 0.59                            | 0.04                  | 31.10                | -2.27 |
| QRPLRGAKTL  | SSPSNRPSGETSVPPPAVGR  | ATX2L_HUMAN |             |      | Ataxin-2-like protein;                      | 0.08                            | 0.00                  | 36.70                | -2.23 |
| AAAAPARAPR  | AAAAAATAPPSGPAQPGPR   | SAMD1_HUMAN |             |      | Atherin;                                    | 0.06                            | 0.01                  | 26.00                | -2.62 |
| AVGELLQEV   | GDSKDDAGIR            | ABCF3_HUMAN |             |      | ATP-binding cassette sub-family F member 3; | 3.86                            | 0.23                  | 32.00                | -3.30 |
| PPTAAHTANF  | LLNASGSTSTPAPSR       | ACLY_HUMAN  |             |      | ATP-citrate synthase;                       | -0.55                           | 0.06                  | 56.50                | -2.28 |
| ILDDFIQNDR  | AAECNIVVTQPR          | DHX9_HUMAN  |             |      | ATP-dependent RNA                           | 2.48                            | 0.17                  | 38.90                | -2.60 |
| LGGIGQFLAK  | AIEPPLDAVIEAEHTLR     | DHX9_HUMAN  |             |      | ATP-dependent RNA                           | 1.71                            | 0.03                  | 32.70                | -1.50 |
| LKAENNSEVG  | ASGYGVPGPTWDR         | DHX9_HUMAN  |             |      | ATP-dependent RNA                           | 0.98                            | 0.06                  | 30.80                | 6.44  |
| AVIEAEHTLR  | ELDALDANDELTPGR       | DHX9_HUMAN  |             |      | ATP-dependent RNA helicase A;               | 0.94                            | 0.08                  | 64.20                | -2.32 |
| VRFLVLDEAD  | GLLSQGYSDFINR         | DDX1_HUMAN  |             |      | ATP-dependent RNA                           | -1.16                           | 0.05                  | 44.20                | -0.47 |
| KMLEQLDMRR  | DVQEIFR               | DX39A_HUMAN | DX39B_HUMAN |      | ATP-dependent RNA helicase DDX39A;          | 4.50                            | 0.88                  | 30.80                | -2.89 |
| YVSIHSSGFR  | DFLLKPELLR            | DX39A_HUMAN | DX39B_HUMAN |      | ATP-dependent RNA                           | 2.32                            | 0.17                  | 24.50                | -0.23 |
| IERNVIAFN   | DMPEDSDTYLHR          | DX39A_HUMAN | DX39B_HUMAN |      | ATP-dependent RNA helicase DDX39A;          | -0.16                           | 0.02                  | 22.60                | -3.50 |
| ENALGLDQQF  | AGLDLNSSDNQSGGSTASKGR | DDX3X_HUMAN |             |      | ATP-dependent RNA helicase DDX3X;           | 1.98                            | 0.23                  | 43.80                | -0.29 |
| DREEALHQFR  | SGKSPILVATAVAAR       | DDX3X_HUMAN | DDX3Y_HUMAN |      | ATP-dependent RNA                           | 1.41                            | 0.12                  | 31.40                | -4.77 |
| EEDSSNVLDLP | YIPAENSPTR            | DDX42_HUMAN |             |      | ATP-dependent RNA                           | 0.09                            | 0.01                  | 25.10                | -1.70 |
| WGVRTMQARG  | FGSDQSENVDR           | ATIF1_HUMAN |             |      | ATPase inhibitor, mitochondrial;            | 1.42                            | 0.11                  | 35.40                | -3.73 |
| GVRTMQARGF  | GSDQSENVDRGAGSIR      | ATIF1_HUMAN |             |      | ATPase inhibitor,                           | -0.12                           | 0.01                  | 43.70                | -3.74 |

Table S5

| Non-prime  | Prime                   | Id 1        | Id 2 | Id 3 | Protein (Id1)                              | Fold-change (log <sub>2</sub> ) | Fc standard deviation | X! Tandem hyperscore | ppm   |
|------------|-------------------------|-------------|------|------|--------------------------------------------|---------------------------------|-----------------------|----------------------|-------|
| LLLLPCEAEA | AAAAAAVSGSAAAEAKECDRPCV | ATRN_HUMAN  |      |      | Attractin;                                 | 0.32                            | 0.02                  | 49.90                | -3.14 |
| PDMLVTKAVV | YRETDPSPEER             | E41L1_HUMAN |      |      | Band 4.1-like protein 1;                   | 0.23                            | 0.01                  | 28.10                | -1.35 |
| EVAENQQNQS | SDPEEEKGSQPPPAESQSSLRR  | E41L2_HUMAN |      |      | Band 4.1-like protein 2;                   | 1.97                            | 0.17                  | 27.70                | -2.16 |
| ICCSEPPVVK | TEMVTISDASQR            | E41L2_HUMAN |      |      | Band 4.1-like protein 2;                   | -1.39                           | 0.11                  | 48.10                | -1.17 |
| SPSTPAGWVR | EGDTVQLLCR              | BCAM_HUMAN  |      |      | Basal cell adhesion molecule;              | 4.18                            | 0.81                  | 26.80                | 3.53  |
| RGQSGTYGCR | VEDYDAADDVQLSKTLELR     | BCAM_HUMAN  |      |      | Basal cell adhesion                        | 1.42                            | 0.13                  | 38.20                | -1.39 |
| RHQTHGSLLR | LYQASPADSGEYVCR         | PGBM_HUMAN  |      |      | Basement membrane-specific heparan sulfate | 6.73                            | 2.16                  | 56.70                | -0.69 |
| ELGSGLAVLR | SAEPLALGR               | PGBM_HUMAN  |      |      | Basement membrane-specific heparan sulfate | 5.29                            | 0.18                  | 33.80                | -2.44 |
| KAQIHGGILR | LPAVEPTDQAQYLCR         | PGBM_HUMAN  |      |      | proteoglycan core protein;                 | 4.75                            | 0.65                  | 43.00                | 4.75  |
| LRSPWPQHR  | LEGDTLIIPR              | PGBM_HUMAN  |      |      | Basement membrane-specific heparan sulfate | 4.23                            | 0.35                  | 37.80                | -3.20 |
| GRAHSVEEGR | CPIGYSGLSCESCAHFTR      | PGBM_HUMAN  |      |      | Basement membrane-specific heparan sulfate | 3.49                            | 0.58                  | 55.70                | 1.34  |
| EGNPIQPGGK | CRPVNQEIVR              | PGBM_HUMAN  |      |      | Basement membrane-specific heparan sulfate | 3.09                            | 0.16                  | 32.60                | -2.84 |
| PLVVEVHPR  | SIVPQGGSHSLR            | PGBM_HUMAN  |      |      | Basement membrane-specific heparan sulfate | 2.58                            | 0.13                  | 26.70                | -0.24 |
| HRVTALREGR | RGSIQVDGEELVSGR         | PGBM_HUMAN  |      |      | proteoglycan core protein;                 | 2.36                            | 0.18                  | 34.20                | -4.96 |
| CRCKNNVGR  | LCNECADGSFHLSTR         | PGBM_HUMAN  |      |      | Basement membrane-specific heparan sulfate | 2.30                            | 0.17                  | 33.50                | -9.85 |
| LAFPGHVFSR | SLPEVPETIELEVR          | PGBM_HUMAN  |      |      | Basement membrane-specific heparan sulfate | 2.23                            | 0.19                  | 45.80                | -2.25 |
| AQPGPSNRPR | ALEVEEGR                | PGBM_HUMAN  |      |      | Basement membrane-specific heparan sulfate | 2.12                            | 0.13                  | 33.90                | -3.00 |

Table S5

| Non-prime   | Prime                      | Id 1        | Id 2 | Id 3 | Protein (Id1)                                             | Fold-change (log <sub>2</sub> ) | Fc standard deviation | X! Tandem hyperscore | ppm   |
|-------------|----------------------------|-------------|------|------|-----------------------------------------------------------|---------------------------------|-----------------------|----------------------|-------|
| GIVQSGGVVR  | IAHVELADAGQYR              | PGBM_HUMAN  |      |      | Basement membrane-specific heparan sulfate                | 1.63                            | 0.09                  | 37.00                | -4.41 |
| GNPSVQGGQC  | LPETNQAPLVVEVHPAR          | PGBM_HUMAN  |      |      | Basement membrane-                                        | 0.38                            | 0.01                  | 35.90                | -0.32 |
| VGEAGQGKDF  | ISLGLQDGHLVFR              | PGBM_HUMAN  |      |      | Basement membrane-                                        | -0.14                           | 0.01                  | 32.90                | -2.95 |
| GEAGQGKDFI  | SLGLQDGHLVFR               | PGBM_HUMAN  |      |      | Basement membrane-                                        | -0.37                           | 0.02                  | 38.60                | -6.17 |
| VHHVKEQYFK  | SAAMTLNER                  | BCLF1_HUMAN |      |      | Bcl-2-associated transcription factor 1;                  | 0.45                            | 0.01                  | 27.90                | -3.41 |
| EQRALQMEGL  | QEDSILCLPAAYCER            | BCOR_HUMAN  |      |      | BCL-6 corepressor;                                        | 4.29                            | 0.41                  | 10.60                | -2.00 |
| LAGALLACLL  | VLTADPPPPPLPAER            | LFNG_HUMAN  |      |      | Beta-1,3-N-acetylglucosaminyltransfe                      | 1.97                            | 0.08                  | 36.50                | 0.69  |
| ALLACLLVLT  | ADPPPPPLPAER               | LFNG_HUMAN  |      |      | Beta-1,3-N-acetylglucosaminyltransfe                      | 1.01                            | 0.04                  | 35.00                | -2.57 |
| YFSLLTRARR  | DAGPPPGAAPR                | LFNG_HUMAN  |      |      | Beta-1,3-N-                                               | 0.59                            | 0.01                  | 52.70                | -2.22 |
| LLACLLVLT   | DPPPPPLPAER                | LFNG_HUMAN  |      |      | Beta-1,3-N-acetylglucosaminyltransfe rase lunatic fringe; | 0.21                            | 0.00                  | 46.60                | 4.28  |
| ACLALAAALA  | ALLLLPLPLPR                | RFNG_HUMAN  |      |      | Beta-1,3-N-                                               | 1.07                            | 0.14                  | 39.60                | -2.97 |
| LALAAALAAL  | LLLPLPLPR                  | RFNG_HUMAN  |      |      | Beta-1,3-N-acetylglucosaminyltransfe rase radical fringe; | 0.35                            | 0.01                  | 31.00                | -1.69 |
| LPQLVGVSTP  | LQGGNSNSAAAIGQSSGELR       | B4GT1_HUMAN |      |      | Beta-1,4-                                                 | -0.73                           | 0.11                  | 73.40                | -1.80 |
| DLSRLPQLVG  | VSTPLQGGNSNSAAAIGQSSGELR   | B4GT1_HUMAN |      |      | Beta-1,4-galactosyltransferase 1;                         | -0.73                           | 0.06                  | 117.80               | -0.95 |
| AGRDL SRLPQ | LVGVSTPLQGGNSNSAAAIGQSSGEI | B4GT1_HUMAN |      |      | Beta-1,4-galactosyltransferase 1;                         | -0.82                           | 0.09                  | 85.20                | 0.84  |
| RELGPLY TNI | TADIGTDPR                  | B4GT3_HUMAN |      |      | Beta-1,4-galactosyltransferase 3;                         | 1.62                            | 0.04                  | 33.80                | -6.36 |
| LLVGSQ LAVM | MYLSLGGFR                  | B4GT3_HUMAN |      |      | Beta-1,4-galactosyltransferase 3;                         | 1.59                            | 0.07                  | 26.90                | 0.37  |
| LVGSQ LAVMM | YLSLGGFR                   | B4GT3_HUMAN |      |      | Beta-1,4-galactosyltransferase 3;                         | 0.49                            | 0.06                  | 22.10                | -1.81 |

Table S5

| Non-prime   | Prime                | Id 1        | Id 2 | Id 3 | Protein (Id1)                                           | Fold-change (log <sub>2</sub> ) | Fc standard deviation | X! Tandem hyperscore | ppm   |
|-------------|----------------------|-------------|------|------|---------------------------------------------------------|---------------------------------|-----------------------|----------------------|-------|
| MMYLSLGGFR  | SLSALFGR             | B4GT3_HUMAN |      |      | Beta-1,4-galactosyltransferase 3;                       | -0.49                           | 0.01                  | 30.30                | -2.94 |
| SKDWSFYLLY  | YTEFTPTEKDEYACR      | B2MG_HUMAN  |      |      | Beta-2-microglobulin;                                   | 1.03                            | 0.13                  | 56.00                | -4.88 |
| GVSLAVCKAG  | AAEKGVPLYR           | ENOB_HUMAN  |      |      | Beta-enolase;                                           | 6.53                            | 1.18                  | 37.30                | -1.55 |
| LGVS LAVCKA | GAAEKGVPLYR          | ENOB_HUMAN  |      |      | Beta-enolase;                                           | 4.59                            | 0.36                  | 33.70                | -0.08 |
| GPLLWGCALG  | LQGGMLYPQESPSR       | BGLR_HUMAN  |      |      | Beta-glucuronidase;                                     | 1.79                            | 0.15                  | 52.10                | -0.31 |
| AAAFAGRATA  | LWPWPQNFQTS DQR      | HEXA_HUMAN  |      |      | Beta-hexosaminidase subunit alpha;                      | 0.92                            | 0.01                  | 55.80                | -3.11 |
| LALCGAGTTA  | AELSYSLR             | MANBA_HUMAN |      |      | Beta-mannosidase;                                       | 0.55                            | 0.02                  | 27.00                | -3.62 |
| LKAQYKEKTG  | KEYIPGQPPLSQSSDSSPTR | SYEP_HUMAN  |      |      | Bifunctional glutamate/proline--tRNA                    | 0.95                            | 0.10                  | 64.30                | 2.33  |
|             | MVQKESQATLEER        | NCOAT_HUMAN |      |      | Bifunctional protein NCOAT;                             | 1.43                            | 0.13                  | 26.40                | -1.90 |
| ALRDAGLAVR  | DVSELTGFPEMLGGR      | PUR9_HUMAN  |      |      | Bifunctional purine biosynthesis protein                | 1.89                            | 0.23                  | 62.80                | -3.18 |
| ERRNENSEVD  | TSAGSGSAPSVLHQR      | BOD1L_HUMAN |      |      | Biorientation of                                        | -0.60                           | 0.02                  | 25.70                | -6.44 |
| AEYLREKLQR  | DLEAEHVEVEDTTLNR     | BOLA2_HUMAN |      |      | BolA-like protein 2;                                    | 5.08                            | 0.50                  | 59.20                | -2.89 |
| LREKLQRDLE  | AEHVEVEDTTLNR        | BOLA2_HUMAN |      |      | BolA-like protein 2;                                    | 0.31                            | 0.02                  | 37.70                | -1.56 |
| GQGPITEDML  | CAGYLEGER            | BSSP4_HUMAN |      |      | Brain-specific serine Bromodomain-containing protein 4; | -4.24                           | 0.80                  | 20.20                | 2.20  |
| KERLRQERM   | SREDEDALEQAR         | BRD4_HUMAN  |      |      |                                                         | -0.44                           | 0.03                  | 27.80                | -3.71 |
|             | IQIRRLKRLG           | C1TC_HUMAN  |      |      | C-1-tetrahydrofolate                                    | 0.84                            | 0.05                  | 46.50                | -0.21 |
| PVVAVNAFK   | TDTESELDLISR         | C1TC_HUMAN  |      |      | C-1-tetrahydrofolate                                    | 0.74                            | 0.04                  | 43.40                | 0.28  |
| MIQYNNLNLK  | TPVPSDIDISR          | C1TC_HUMAN  |      |      | C-1-tetrahydrofolate                                    | 0.34                            | 0.02                  | 29.40                | -2.11 |
|             | RRLKRLGIEK           | C1TC_HUMAN  |      |      | C-1-tetrahydrofolate synthase, cytoplasmic;             | 0.20                            | 0.02                  | 47.00                | -0.26 |
| LASAVLLASL  | LSLHLGTATR           | CCL26_HUMAN |      |      | C-C motif chemokine 26;                                 | 3.06                            | 0.33                  | 9.10                 | -1.82 |
| EHQVELELLR  | DDNEQLITQYER         | JIP4_HUMAN  |      |      | C-Jun-amino-terminal                                    | 1.51                            | 0.10                  | 63.10                | 0.64  |
| LVYLTQPGNG  | NEGSVTGSCYCGKR       | CXL16_HUMAN |      |      | C-X-C motif chemokine 16;                               | -0.02                           | 0.00                  | 42.10                | -2.82 |

Table S5

| Non-prime  | Prime               | Id 1        | Id 2 | Id 3 | Protein (Id1)                                 | Fold-change (log <sub>2</sub> ) | Fc standard deviation | X! Tandem hyperscore | ppm   |
|------------|---------------------|-------------|------|------|-----------------------------------------------|---------------------------------|-----------------------|----------------------|-------|
| LLLTPPGPLA | SAGPVSAVLTELR       | CXCL6_HUMAN |      |      | C-X-C motif chemokine                         | 0.20                            | 0.00                  | 52.40                | -2.63 |
| LTPPGPLASA | GPVSAVLTELR         | CXCL6_HUMAN |      |      | C-X-C motif chemokine                         | -0.04                           | 0.00                  | 59.60                | -1.88 |
| LQQDVKLNGA | GLEVEDSDPEPEGEAEDR  | CPMD8_HUMAN |      |      | C3 and PZP-like alpha-2-macroglobulin domain- | -6.27                           | 0.00                  | 20.50                | -1.29 |
| PILVVDSGPP | TLSSGTTLIR          | CAD22_HUMAN |      |      | Cadherin-22;                                  | 3.50                            | 0.25                  | 23.70                | 2.12  |
| MESMAVATD  | GGERPGVPAGSGLSASQR  | CAMLG_HUMAN |      |      | Calcium signal-modulating cyclophilin         | 0.57                            | 0.05                  | 50.10                | -0.23 |
| SEEEIREAFR | VFDKDGNGYISAAELR    | CALM_HUMAN  |      |      | Calmodulin;                                   | 1.90                            | 0.11                  | 34.90                | -1.32 |
| AFRVFDKDG  | GYISAAELR           | CALM_HUMAN  |      |      | Calmodulin;                                   | -0.16                           | 0.01                  | 41.10                | -3.75 |
| EVDADGNGTI | DFPEFLTMMAR         | CALM_HUMAN  |      |      | Calmodulin;                                   | -2.44                           | 0.27                  | 37.90                | -4.31 |
| ISAISEAAQ  | YNPEPPPPR           | CPNS1_HUMAN |      |      | Calpain small subunit 1;                      | 1.33                            | 0.06                  | 30.70                | -3.38 |
| PPRTHYSNIE | ANESEEVQR           | CPNS1_HUMAN |      |      | Calpain small subunit 1;                      | 0.76                            | 0.04                  | 23.60                | -3.15 |
| AMRILGGVIS | AISEAAAQYNPEPPPPR   | CPNS1_HUMAN |      |      | Calpain small subunit 1;                      | 0.61                            | 0.02                  | 44.40                | 1.69  |
| NPEPPPRTH  | YSNIEANESEEV        | CPNS1_HUMAN |      |      | Calpain small subunit 1;                      | 0.49                            | 0.05                  | 62.80                | -2.04 |
| SSKTRGIEWK | RPTEICADPQFIIGGATR  | CAN2_HUMAN  |      |      | Calpain-2 catalytic                           | 0.35                            | 0.03                  | 48.40                | 2.16  |
| FDQTTISLQM | GTNKGASQAGMLAPGTR   | CNN3_HUMAN  |      |      | Calponin-3;                                   | 1.37                            | 0.13                  | 38.20                | -4.12 |
| TISLQMGTK  | GASQAGMLAPGTRR      | CNN3_HUMAN  |      |      | Calponin-3;                                   | 0.29                            | 0.02                  | 37.50                | -3.62 |
| LLGLLGLAVA | EPAVYFKEQFLDGDGWTSR | CALR_HUMAN  |      |      | Calreticulin;                                 | 0.75                            | 0.03                  | 32.20                | 1.87  |
| AVAEPAVYFK | EQFLDGDGWTSR        | CALR_HUMAN  |      |      | Calreticulin;                                 | 0.44                            | 0.05                  | 33.80                | -9.96 |
| KKVIDCLYTC | KEGLDLQVLEDSGR      | CSTN1_HUMAN |      |      | Calsyntenin-1;                                | 0.42                            | 0.03                  | 35.10                | -1.79 |
| HHFARAASEF | ESSEGVLFPPELR       | CSTN1_HUMAN |      |      | Calsyntenin-1;                                | 0.20                            | 0.01                  | 41.70                | -2.78 |
| FARAASEFES | SEGVFLFPPELR        | CSTN1_HUMAN |      |      | Calsyntenin-1;                                | -0.08                           | 0.00                  | 37.20                | -7.38 |

Table S5

| Non-prime   | Prime                  | Id 1        | Id 2 | Id 3 | Protein (Id1)                                              | Fold-change (log <sub>2</sub> ) | Fc standard deviation | X! Tandem hyperscore | ppm   |
|-------------|------------------------|-------------|------|------|------------------------------------------------------------|---------------------------------|-----------------------|----------------------|-------|
| RAASEFESSE  | GVFLFPELR              | CSTN1_HUMAN |      |      | Calsyntenin-1;                                             | -0.79                           | 0.03                  | 36.50                | 7.68  |
| ARAASEFESS  | EGVFLFPELR             | CSTN1_HUMAN |      |      | Calsyntenin-1;                                             | -0.82                           | 0.03                  | 36.40                | 0.56  |
| DEPEWVKTER  | EQFVEFR                | CALU_HUMAN  |      |      | Calumenin;                                                 | 2.86                            | 0.11                  | 23.70                | -3.46 |
| GNTDEPEWVK  | TEREQFVEFR             | CALU_HUMAN  |      |      | Calumenin;                                                 | 0.31                            | 0.02                  | 27.20                | -3.27 |
| NPVVKGRRRR  | GAISAEVYTEEDAASYVR     | KAP0_HUMAN  |      |      | cAMP-dependent protein kinase type I-alpha                 | 0.06                            | 0.00                  | 60.30                | 6.46  |
| EKTISSEKAS  | STPSSETQEEFVDDFR       | CLIP1_HUMAN |      |      | CAP-Gly domain-containing linker protein                   | 0.93                            | 0.10                  | 71.90                | 7.67  |
| VNSLQQQPQA  | ASPSVPEPHSLTPVAQADPLVR | CAPR1_HUMAN |      |      | Caprin-1;                                                  | 0.67                            | 0.03                  | 35.20                | -2.18 |
| CLLLACPATA  | TGPEVAQPEVDTTLGR       | EST3_HUMAN  |      |      | Carboxylesterase 3;                                        | 1.31                            | 0.15                  | 55.50                | 1.00  |
| ATKNDIGPYE  | CEIQNPVGASR            | CEAM7_HUMAN |      |      | Carcinoembryonic antigen-related cell adhesion molecule 7; | 0.11                            | 0.01                  | 24.20                | -4.84 |
| TELDDGIQAD  | SGPINDTDANPR           | CASP7_HUMAN |      |      | Caspase-7;                                                 | 0.61                            | 0.04                  | 51.70                | -3.64 |
| PQCPTIKEIR  | DQGSCGSCWAFGAVEAISDR   | CATB_HUMAN  |      |      | Cathepsin B;                                               | 2.00                            | 0.16                  | 48.90                | 2.95  |
| PKPPQRMFT   | EDLKLPAFDAR            | CATB_HUMAN  |      |      | Cathepsin B;                                               | 0.44                            | 0.03                  | 38.60                | -2.39 |
| WTKWKAMHNR  | LYGMNEEGWR             | CATL1_HUMAN |      |      | Cathepsin L1;                                              | 4.48                            | 0.40                  | 20.00                | -3.19 |
| FQNRKPRK GK | VFQEPLFYEAPR           | CATL1_HUMAN |      |      | Cathepsin L1;                                              | 1.97                            | 0.11                  | 48.00                | 1.84  |
| ADLPKSWDWR  | NVDGVNYASITR           | CATZ_HUMAN  |      |      | Cathepsin Z;                                               | 1.50                            | 0.07                  | 44.60                | -1.57 |
| NGLSEYLDLS  | SPGPVEILTTVTESVTGISR   | CD109_HUMAN |      |      | CD109 antigen;                                             | 1.52                            | 0.04                  | 44.10                | 3.62  |
| LSEYLDLSSP  | GPVEILTTVTESVTGISR     | CD109_HUMAN |      |      | CD109 antigen;                                             | -0.20                           | 0.02                  | 43.60                | -2.48 |
| LGYRKYQPNI  | DVQESIHFLESEFSR        | CD109_HUMAN |      |      | CD109 antigen;                                             | -0.69                           | 0.08                  | 34.50                | -4.09 |
| SLNPSGEVTR  | QIGDALPVSCTISASR       | CD166_HUMAN |      |      | CD166 antigen;                                             | 4.21                            | 0.39                  | 36.20                | -0.12 |
| TVNSLNVSAI  | SIPEHDEADEISDENR       | CD166_HUMAN |      |      | CD166 antigen;                                             | 2.64                            | 0.22                  | 58.80                | -5.25 |
| SATVFRPGLG  | WYTVNSAYGDTIIIPCR      | CD166_HUMAN |      |      | CD166 antigen;                                             | 1.05                            | 0.06                  | 80.70                | -0.53 |
| RTVNSLNVSA  | ISIPEHDEADEISDENR      | CD166_HUMAN |      |      | CD166 antigen;                                             | 0.61                            | 0.07                  | 34.10                | -0.70 |

Table S5

| Non-prime  | Prime                   | Id 1        | Id 2 | Id 3 | Protein (Id1)                                     | Fold-change (log <sub>2</sub> ) | Fc standard deviation | X! Tandem hyperscore | ppm   |
|------------|-------------------------|-------------|------|------|---------------------------------------------------|---------------------------------|-----------------------|----------------------|-------|
| FIAFRSSTKK | SVQYDDVPEYKDR           | CD166_HUMAN |      |      | CD166 antigen;                                    | 0.48                            | 0.04                  | 31.30                | 0.24  |
| TRYVQKGEYR | TNPEDIYPSNPTDDDSSGSSSER | CD44_HUMAN  |      |      | CD44 antigen;                                     | 3.15                            | 0.18                  | 28.40                | -6.16 |
| EASKSQEMVH | LVNKESSETPDQFMTADETR    | CD44_HUMAN  |      |      | CD44 antigen;                                     | 2.28                            | 0.18                  | 62.80                | -1.95 |
| EMVHLVNKES | SETPDQFMTADETR          | CD44_HUMAN  |      |      | CD44 antigen;                                     | 2.03                            | 0.15                  | 75.50                | -1.93 |
| ALSIGFETCR | YGFIEGHVVIPR            | CD44_HUMAN  |      |      | CD44 antigen;                                     | 1.76                            | 0.04                  | 38.50                | -8.05 |
| MVHLVNKES  | ETPDQFMTADETR           | CD44_HUMAN  |      |      | CD44 antigen;                                     | 0.98                            | 0.02                  | 68.60                | -0.64 |
| SQEMVHLVNK | ESSETPDQFMTADETR        | CD44_HUMAN  |      |      | CD44 antigen;                                     | 0.59                            | 0.04                  | 63.70                | 3.15  |
| APPEEDCTSV | TDLPNAFDGPITITIVNR      | CD44_HUMAN  |      |      | CD44 antigen;                                     | -0.34                           | 0.04                  | 52.90                | 3.26  |
| GLCLVPLSLA | QIDLNITCR               | CD44_HUMAN  |      |      | CD44 antigen;                                     | -0.76                           | 0.01                  | 32.60                | -3.00 |
| TSVTDLPNAF | DGPITITIVNR             | CD44_HUMAN  |      |      | CD44 antigen;                                     | -1.60                           | 0.15                  | 49.00                | -2.03 |
| QKKKLCFKEN | AEQGEVDMESHR            | CD99_HUMAN  |      |      | CD99 antigen;                                     | 1.91                            | 0.23                  | 34.70                | -2.96 |
|            | M VGGEAAA AVEELVSGVR    | C2AIL_HUMAN |      |      | CDKN2AIP N-terminal-                              | 0.37                            | 0.03                  | 37.10                | -2.55 |
| APENPVVEVR | EQAVEGGEVELSCLVPR       | CADM4_HUMAN |      |      | Cell adhesion molecule 4;                         | 4.59                            | 0.34                  | 63.80                | -1.21 |
| WCSVRQKGSY | LTHEASGLDEQGEAR         | CADM4_HUMAN |      |      | Cell adhesion molecule 4;                         | 2.75                            | 0.29                  | 47.80                | -3.04 |
| EADGDVPGPR | GEAEGQAEAKGDAPGPR       | CGRE1_HUMAN |      |      | Cell growth regulator with                        | 2.42                            | 0.15                  | 39.30                | -1.53 |
| EAKGDAPGPR | GEAGGQAEAEAGDAPGPR      | CGRE1_HUMAN |      |      | Cell growth regulator with EF hand domain protein | 2.17                            | 0.18                  | 76.20                | -1.82 |
| LQSYLKGLGR | TEVQLEHLR               | CGRE1_HUMAN |      |      | Cell growth regulator with                        | 0.38                            | 0.01                  | 22.70                | -1.69 |
| GRQSLLAKSP | LRQETQEAPGPR            | CGRE1_HUMAN |      |      | Cell growth regulator with                        | -0.47                           | 0.05                  | 38.60                | -2.54 |
| TSDRGFQFVS | SSLPDICYR               | CNBP_HUMAN  |      |      | Cellular nucleic acid-binding protein;            | 1.18                            | 0.09                  | 43.60                | -3.33 |



Table S5

| Non-prime  | Prime              | Id 1        | Id 2 | Id 3 | Protein (Id1)                                | Fold-change (log <sub>2</sub> ) | Fc standard deviation | X! Tandem hyperscore | ppm   |
|------------|--------------------|-------------|------|------|----------------------------------------------|---------------------------------|-----------------------|----------------------|-------|
| LIPHINKQTS | STPSSLALTSASR      | CE170_HUMAN |      |      | Centrosomal protein of 170 kDa;              | 1.35                            | 0.07                  | 35.90                | 1.07  |
| GKKAEEAASA | LADADADLEER        | CHM2A_HUMAN |      |      | Charged multivesicular                       | 2.48                            | 0.15                  | 36.20                | 6.42  |
| IVQVVCKKYR | GFTIPEAFR          | CLIC1_HUMAN |      |      | Chloride intracellular channel protein 1;    | -0.23                           | 0.01                  | 27.50                | -4.20 |
| AWEEVRGVFR | VAIQPVNDHAPVQTISR  | CSPG4_HUMAN |      |      | Chondroitin sulfate proteoglycan 4;          | 2.42                            | 0.40                  | 34.00                | 4.91  |
| RSSLSQQQLR | VVSDREEPEAAAYR     | CSPG4_HUMAN |      |      | Chondroitin sulfate                          | 0.68                            | 0.03                  | 23.00                | -0.19 |
| DTNLDIRSGD | EVHYHVTAGPR        | CSPG4_HUMAN |      |      | Chondroitin sulfate                          | -2.66                           | 0.17                  | 22.60                | -1.69 |
| LLGSRPARG  | AGPEPPVLPPIR       | CHRD_HUMAN  |      |      | Chordin;                                     | -0.32                           | 0.02                  | 31.10                | -3.22 |
| VAVVESMVTA | TEVAPPPPPVEVPIR    | CHD4_HUMAN  |      |      | Chromodomain-helicase-DNA-binding protein 4; | 0.74                            | 0.06                  | 37.60                | -1.78 |
| VVESMVTATE | VAPPPPPVEVPIR      | CHD4_HUMAN  |      |      | Chromodomain-helicase-                       | 0.51                            | 0.03                  | 51.70                | -3.99 |
| ASSPESPVLA | ASPEPWGSPAASPESR   | CHAP1_HUMAN |      |      | Chromosome alignment-                        | 0.35                            | 0.02                  | 44.90                | -2.73 |
| NQNFYLSKQL | DEASGANDEIVQLR     | CTRO_HUMAN  |      |      | Citron Rho-interacting                       | 0.61                            | 0.06                  | 68.10                | -2.19 |
| YNEHITKRVA | SSPAPPEGPSHPR      | CTRO_HUMAN  |      |      | Citron Rho-interacting kinase;               | -0.69                           | 0.08                  | 54.40                | -2.16 |
| PDLALRMAVR | NNLAGAEELFAR       | CLH1_HUMAN  |      |      | Clathrin heavy chain 1;                      | 2.02                            | 0.12                  | 44.00                | -1.72 |
| QESNGPTDSY | AAISQVDRLQSEPEISIR | CLCA_HUMAN  |      |      | Clathrin light chain A;                      | 1.58                            | 0.13                  | 37.70                | -4.10 |
| DSYAAISQVD | RLQSEPEISIR        | CLCA_HUMAN  |      |      | Clathrin light chain A;                      | -0.44                           | 0.03                  | 35.80                | -2.25 |
| PEFNNTDQID | LYDDVLTATSQPSDDR   | CPSF7_HUMAN |      |      | Cleavage and polyadenylation                 | 0.20                            | 0.01                  | 59.70                | -1.04 |
| NTDQIDLYDD | VLTATSQPSDDR       | CPSF7_HUMAN |      |      | Cleavage and                                 | -0.55                           | 0.02                  | 37.50                | 0.30  |
| PSGVTEVVVK | LFSDPITVTVPVVEVSR  | CLUS_HUMAN  |      |      | Clusterin;                                   | 5.79                            | 0.66                  | 51.00                | -0.95 |
| RMKDQCDKCR | EILSVCSTNNPSQAKLR  | CLUS_HUMAN  |      |      | Clusterin;                                   | 4.94                            | 0.46                  | 41.40                | 0.81  |
| LDVMQDHFSR | ASSIIDELFQDR       | CLUS_HUMAN  |      |      | Clusterin;                                   | 3.34                            | 0.46                  | 56.00                | -2.81 |
| NPSQAKLRRE | LDESLQVAER         | CLUS_HUMAN  |      |      | Clusterin;                                   | 2.19                            | 0.13                  | 31.90                | -1.00 |

Table S5

| Non-prime  | Prime                    | Id 1        | Id 2        | Id 3 | Protein (Id1)                                    | Fold-change (log <sub>2</sub> ) | Fc standard deviation | X! Tandem hyperscore | ppm   |
|------------|--------------------------|-------------|-------------|------|--------------------------------------------------|---------------------------------|-----------------------|----------------------|-------|
| TNNPSQAKLR | RELDESLQVAER             | CLUS_HUMAN  |             |      | Clusterin;                                       | 1.24                            | 0.03                  | 37.00                | -2.71 |
| NNPSQAKLRR | ELDESLQVAER              | CLUS_HUMAN  |             |      | Clusterin;                                       | 0.13                            | 0.01                  | 51.10                | -1.14 |
| VTEVVVKLFD | SDPITVTVPVEVSR           | CLUS_HUMAN  |             |      | Clusterin;                                       | -0.42                           | 0.03                  | 38.70                | -2.22 |
| WKMLNTSSLL | EQLNEQFNWVSR             | CLUS_HUMAN  |             |      | Clusterin;                                       | -0.47                           | 0.04                  | 58.90                | -1.64 |
| VMQDHFSRAS | SIIDELFQDR               | CLUS_HUMAN  |             |      | Clusterin;                                       | -0.76                           | 0.05                  | 48.10                | 0.00  |
| DVMQDHFSRA | SSIIDELFQDR              | CLUS_HUMAN  |             |      | Clusterin;                                       | -0.76                           | 0.08                  | 44.30                | -3.68 |
| GVTEVVVKLF | DSDPITVTVPVEVSR          | CLUS_HUMAN  |             |      | Clusterin;                                       | -0.96                           | 0.08                  | 35.70                | 1.94  |
| PSQAKLRREL | DESLQVAER                | CLUS_HUMAN  |             |      | Clusterin;                                       | -1.00                           | 0.04                  | 36.80                | 0.19  |
| QFNWVSRLAN | LTQGEDQYYLR              | CLUS_HUMAN  |             |      | Clusterin;                                       | -1.00                           | 0.10                  | 46.30                | -1.41 |
| SGVTEVVVKL | FSDPITVTVPVEVSR          | CLUS_HUMAN  |             |      | Clusterin;                                       | -1.49                           | 0.17                  | 42.40                | 3.73  |
| MSKRSKFALI | TWIGENVSLQQR             | COTL1_HUMAN |             |      | Coactosin-like protein;                          | -2.79                           | 0.19                  | 33.60                | -1.43 |
| LLLLPGPAGS | EGAAPIAITCFTR            | COCH_HUMAN  |             |      | Cochlin;                                         | 5.90                            | 0.43                  | 62.90                | -1.32 |
| PKESHAFTR  | EFTGLEPIVSDVIR           | COCH_HUMAN  |             |      | Cochlin;                                         | 2.65                            | 0.28                  | 41.20                | 3.43  |
| EPPVQTAVLT | ASAPAAQAGASQGLHALLEER    | C2D1B_HUMAN |             |      | Coiled-coil and C2 domain-containing protein     | -0.08                           | 0.00                  | 39.30                | 1.63  |
| PPVQTAVLTA | SAPAAQAGASQGLHALLEER     | C2D1B_HUMAN |             |      | Coiled-coil and C2 domain-containing protein 1B; | -0.58                           | 0.02                  | 34.60                | 1.74  |
| LVFGLIWGLM | LLHYTFQQPR               | CC126_HUMAN |             |      | Coiled-coil domain-containing protein 126;       | -0.16                           | 0.01                  | 24.90                | 0.53  |
| VSRTRRALVE | FESNPEETREPGSPPSVQR      | CCD86_HUMAN |             |      | Coiled-coil domain-containing protein 86;        | 0.24                            | 0.01                  | 23.10                | -3.21 |
| PPASRAPQMR | AAPRPAPVAQPAAAPPSAVGSSAA | CHCH2_HUMAN | CHCH9_HUMAN |      | Coiled-coil-helix-coiled-coil-helix domain-      | -0.63                           | 0.05                  | 57.70                | -8.21 |
| QMRAAPRPAP | VAQPPAAAPPSAVGSSAAAPR    | CHCH2_HUMAN | CHCH9_HUMAN |      | Coiled-coil-helix-coiled-coil-helix domain-      | -1.04                           | 0.13                  | 36.30                | 2.93  |
| MRAAPRPAPV | AQPPAAAPPSAVGSSAAAPR     | CHCH2_HUMAN | CHCH9_HUMAN |      | Coiled-coil-helix-coiled-                        | -1.25                           | 0.12                  | 28.40                | -1.82 |

Table S5

| Non-prime  | Prime                   | Id 1        | Id 2 | Id 3 | Protein (Id1)                  | Fold-change (log <sub>2</sub> ) | Fc standard deviation | X! Tandem hyperscore | ppm   |
|------------|-------------------------|-------------|------|------|--------------------------------|---------------------------------|-----------------------|----------------------|-------|
| RGDPGSPGPP | GPPGDDGER               | CO5A1_HUMAN |      |      | Collagen alpha-1(V) chain;     | -4.24                           | 0.00                  | 23.60                | -8.24 |
| GRTDPAHDVR | VAVVQYSGTGQQRPER        | CO6A1_HUMAN |      |      | Collagen alpha-1(VI) chain;    | 7.22                            | 0.94                  | 28.30                | -1.66 |
| QLLPSPNNR  | IALVITDGR               | CO6A1_HUMAN |      |      | Collagen alpha-1(VI)           | 6.88                            | 0.93                  | 41.20                | -3.24 |
| FTGEALQYTR | DQLLPSPNNR              | CO6A1_HUMAN |      |      | Collagen alpha-1(VI)           | 3.55                            | 0.10                  | 26.00                | -3.36 |
| VNEAKHLGVK | VFSVAITPDHLEPR          | CO6A1_HUMAN |      |      | Collagen alpha-1(VI)           | 3.34                            | 0.28                  | 40.20                | -4.59 |
| PHIRVLVTGK | TAEYDVAYGESHLFR         | CO6A1_HUMAN |      |      | Collagen alpha-1(VI)           | 1.57                            | 0.07                  | 45.00                | 1.29  |
| NGTKGYPLK  | GDEGEAGDPGDDNNDIAPR     | CO6A1_HUMAN |      |      | Collagen alpha-1(VI) chain;    | 1.41                            | 0.22                  | 79.20                | 2.37  |
| SAVDAMDFIN | DATDVNDALGYVTR          | CO6A1_HUMAN |      |      | Collagen alpha-1(VI) chain;    | 0.45                            | 0.04                  | 76.80                | -3.31 |
| LASAVDAMDF | INDATDVNDALGYVTR        | CO6A1_HUMAN |      |      | Collagen alpha-1(VI)           | 0.34                            | 0.04                  | 63.60                | -0.45 |
| FECQPARGPP | GLRGDPGFEGER            | CO6A1_HUMAN |      |      | Collagen alpha-1(VI)           | -0.02                           | 0.00                  | 33.30                | -1.36 |
| IKNNVEQVCC | SFECQPAR                | CO6A1_HUMAN |      |      | Collagen alpha-1(VI)           | -0.06                           | 0.00                  | 26.90                | -0.68 |
| VWNAGALHYS | DEVEIIQGLTR             | CO6A1_HUMAN |      |      | Collagen alpha-1(VI)           | -0.18                           | 0.01                  | 48.30                | 1.76  |
| NEAKHLGVKV | FVVAITPDHLEPR           | CO6A1_HUMAN |      |      | Collagen alpha-1(VI)           | -0.20                           | 0.01                  | 24.30                | -3.43 |
| DAMDFINDAT | DVNDALGYVTR             | CO6A1_HUMAN |      |      | Collagen alpha-1(VI) chain;    | -0.23                           | 0.02                  | 59.30                | -7.71 |
| WNAGALHYS  | EVEIIQGLTR              | CO6A1_HUMAN |      |      | Collagen alpha-1(VI)           | -1.66                           | 0.11                  | 44.50                | -4.44 |
| ESGTRRGIPK | VIVVITDGR               | COEA1_HUMAN |      |      | Collagen alpha-1(XIV) chain;   | 10.36                           | 0.00                  | 32.90                | -4.10 |
| LTESYCETWR | TEAPSATGQASSLLGGR       | COIA1_HUMAN |      |      | Collagen alpha-1(XVIII) chain; | 5.70                            | 0.93                  | 79.10                | -1.10 |
| QLEARTPLPR | GTDNEVAALQPPVQLHDSNPYPF | COIA1_HUMAN |      |      | Collagen alpha-1(XVIII)        | 4.26                            | 0.52                  | 44.50                | 0.15  |
| GTFRAFLSSR | LQDLYSIVR               | COIA1_HUMAN |      |      | Collagen alpha-1(XVIII)        | 4.01                            | 0.33                  | 30.50                | -1.85 |
| DWYIWQVIDQ | YSIPQVSIR               | COMA1_HUMAN |      |      | Collagen alpha-1(XXII) chain;  | 4.11                            | 0.28                  | 26.70                | 0.92  |
| PGFAGPPGPP | GPVGLPGEIGIR            | CO9A2_HUMAN |      |      | Collagen alpha-2(IX)           | -0.39                           | 0.02                  | 29.60                | 4.58  |
| WKLLEVPEGR | TNFDNDIALVR             | C1S_HUMAN   |      |      | Complement C1s subcomponent;   | 1.93                            | 0.08                  | 47.90                | -2.45 |
| QVPDTESETR | ILLQGTPVAQMTEDAVER      | CO3_HUMAN   |      |      | Complement C3;                 | 6.64                            | 0.57                  | 102.80               | -1.83 |

Table S5

| Non-prime  | Prime                     | Id 1      | Id 2 | Id 3 | Protein (Id1)  | Fold-change (log <sub>2</sub> ) | Fc standard deviation | X! Tandem hyperscore | ppm   |
|------------|---------------------------|-----------|------|------|----------------|---------------------------------|-----------------------|----------------------|-------|
| ARASHLGLAR | SNLDEDIHAEENIVSR          | CO3_HUMAN |      |      | Complement C3; | 6.14                            | 0.81                  | 76.60                | -3.79 |
| SDEVQVGQQR | TFISPIKCR                 | CO3_HUMAN |      |      | Complement C3; | 4.90                            | 0.67                  | 32.00                | -1.10 |
| RISLPESLKR | IPIEDGSGEVVLSR            | CO3_HUMAN |      |      | Complement C3; | 4.41                            | 0.47                  | 40.50                | -1.00 |
| RTLDPERLGR | EGVQKEDIPPADLSDQVPDTESETF | CO3_HUMAN |      |      | Complement C3; | 4.09                            | 0.10                  | 41.20                | 0.36  |
| KPLSITVRTK | KQELSEAEQATR              | CO3_HUMAN |      |      | Complement C3; | 2.86                            | 0.23                  | 34.60                | -3.38 |
| THLPLALGSP | MYSIITPNILR               | CO3_HUMAN |      |      | Complement C3; | 2.76                            | 0.39                  | 36.60                | -1.78 |
| KKVEGTAFVI | FGIQDGEQR                 | CO3_HUMAN |      |      | Complement C3; | 2.10                            | 0.11                  | 36.00                | -2.50 |
| LLTHLPLALG | SPMYSIITPNILR             | CO3_HUMAN |      |      | Complement C3; | 2.03                            | 0.08                  | 69.10                | 0.19  |
| YIMAIEQTIK | SGSDEVQVGQQR              | CO3_HUMAN |      |      | Complement C3; | 1.83                            | 0.17                  | 55.00                | -4.10 |
| HHFISDGVRK | SLKVVPPEGIR               | CO3_HUMAN |      |      | Complement C3; | 1.79                            | 0.14                  | 28.50                | -2.86 |
| ATRTMQALPY | STVGNSNNYLHLSVLR          | CO3_HUMAN |      |      | Complement C3; | 1.68                            | 0.08                  | 31.40                | -2.55 |
| QATRTMQALP | YSTVGNSNNYLHLSVLR         | CO3_HUMAN |      |      | Complement C3; | 1.65                            | 0.12                  | 29.60                | -3.25 |
| VGKSLYVSAT | VILHSGSDMVQAER            | CO3_HUMAN |      |      | Complement C3; | 1.37                            | 0.06                  | 44.20                | -2.74 |
| RTELRPGETL | NVNFLLR                   | CO3_HUMAN |      |      | Complement C3; | 1.23                            | 0.09                  | 23.80                | -0.88 |
| VPDTESETRI | LLQGTTPVAQMTEDAVIDAER     | CO3_HUMAN |      |      | Complement C3; | 1.14                            | 0.04                  | 52.70                | 9.02  |
| SLPESLKRIP | IEDGSGEVVLSR              | CO3_HUMAN |      |      | Complement C3; | 1.08                            | 0.08                  | 38.80                | -5.12 |
| QALPYSTVGN | SNNYLHLSVLR               | CO3_HUMAN |      |      | Complement C3; | 1.07                            | 0.05                  | 38.70                | -3.57 |
| EGVQKEDIPP | ADLSDQVPDTESETR           | CO3_HUMAN |      |      | Complement C3; | 0.90                            | 0.07                  | 57.40                | -2.19 |
| PLSITVRTKK | QELSEAEQATR               | CO3_HUMAN |      |      | Complement C3; | 0.90                            | 0.05                  | 36.00                | -1.63 |
| EVTVMQDFFI | DLRLPYSVVR                | CO3_HUMAN |      |      | Complement C3; | 0.62                            | 0.04                  | 32.30                | -2.81 |
| GVQKEDIPPA | DLSDQVPDTESETR            | CO3_HUMAN |      |      | Complement C3; | 0.56                            | 0.04                  | 30.80                | 2.47  |
| LYGKKVEGTA | FVIFGIQDGEQR              | CO3_HUMAN |      |      | Complement C3; | 0.47                            | 0.03                  | 30.80                | -4.71 |
| SHLGLARSNL | DEDIHAEEENIVSR            | CO3_HUMAN |      |      | Complement C3; | 0.32                            | 0.02                  | 51.60                | -4.44 |

Table S5

| Non-prime  | Prime                    | Id 1        | Id 2 | Id 3 | Protein (Id1)                                       | Fold-change (log <sub>2</sub> ) | Fc standard deviation | X! Tandem hyperscore | ppm   |
|------------|--------------------------|-------------|------|------|-----------------------------------------------------|---------------------------------|-----------------------|----------------------|-------|
| LLALLQLKDF | DFVPPVVR                 | CO3_HUMAN   |      |      | Complement C3;                                      | 0.32                            | 0.03                  | 22.70                | 4.05  |
| QHARASHLGL | ARSNLDEDIIAEENIVSR       | CO3_HUMAN   |      |      | Complement C3;                                      | 0.16                            | 0.01                  | 42.80                | 2.03  |
| VLLCLPAVWG | DCGLPPDVPNAQPALEGR       | DAF_HUMAN   |      |      | Complement decay-accelerating factor;               | 0.26                            | 0.00                  | 81.40                | 0.57  |
| GTRKVGSR   | LEDVVTYHCSR              | CFAB_HUMAN  |      |      | Complement factor B;                                | 1.88                            | 0.15                  | 29.50                | -1.36 |
| RLMCAESNRR | DSCKGDSGGPLVCGGVLEGVVTSK | CFAD_HUMAN  |      |      | Complement factor D;                                | 3.69                            | 0.16                  | 72.40                | -0.96 |
| DDQALGPELT | APAPEPPAEPR              | COG8_HUMAN  |      |      | Conserved oligomeric                                | 0.29                            | 0.07                  | 29.90                | -0.08 |
| VATGPYRFR  | VAAASGHCGAFSGSDSSR       | F120A_HUMAN |      |      | Constitutive coactivator of PPAR-gamma-like protein | -0.44                           | 0.05                  | 47.00                | -1.08 |
| PTQWSPVGA  | GNPPDCDAPLASALPR         | CNTP3_HUMAN |      |      | Contactin-associated                                | 0.56                            | 0.02                  | 40.40                | -3.81 |
| NRGLDTGRRR | AAPEASGTPSSDAVSR         | COR1A_HUMAN |      |      | Coronin-1A;                                         | 0.11                            | 0.02                  | 47.90                | 1.11  |
| LEAEWVSGR  | DADPILISLR               | COR1B_HUMAN |      |      | Coronin-1B;                                         | 5.71                            | 0.69                  | 48.10                | -2.01 |
| APGSSHLGAP | ASTTTAADATPSGLAR         | COR1B_HUMAN |      |      | Coronin-1B;                                         | 0.93                            | 0.10                  | 68.30                | -0.68 |
| RRNVLSDSRP | AMAPGSSHLGAPASTTTAADATPS | COR1B_HUMAN |      |      | Coronin-1B;                                         | 0.47                            | 0.04                  | 60.70                | -0.67 |
| AMAPGSSHLG | APASTTTAADATPSGLAR       | COR1B_HUMAN |      |      | Coronin-1B;                                         | -0.04                           | 0.00                  | 68.10                | -1.91 |
| GDEEYEVFK  | DLFDPIIEDR               | KCRB_HUMAN  |      |      | Creatine kinase B-type;                             | 4.55                            | 0.43                  | 44.30                | -3.09 |
| VLKRLRLQKR | GTGGVDTAAVGGVFDVSNADR    | KCRB_HUMAN  |      |      | Creatine kinase B-type;                             | 3.97                            | 0.36                  | 80.10                | -2.86 |
| EVLKRLRLQK | RGTGGVDTAAVGGVFDVSNADR   | KCRB_HUMAN  |      |      | Creatine kinase B-type;                             | 3.36                            | 0.36                  | 76.80                | 2.79  |
| ESYEVFKDLF | DPIIEDR                  | KCRB_HUMAN  |      |      | Creatine kinase B-type;                             | 0.52                            | 0.01                  | 29.60                | -3.16 |
| TSTIAPGVVM | ASSPALPTQPAEEAAR         | CREB1_HUMAN |      |      | Cyclic AMP-responsive element-binding protein 1;    | 0.44                            | 0.04                  | 29.50                | -1.41 |

Table S5

| Non-prime   | Prime                  | Id 1        | Id 2 | Id 3 | Protein (Id1)                                     | Fold-change (log <sub>2</sub> ) | Fc standard deviation | X! Tandem hyperscore | ppm   |
|-------------|------------------------|-------------|------|------|---------------------------------------------------|---------------------------------|-----------------------|----------------------|-------|
| TTGQVVAMKK  | IRLESEEEGVPSTAIR       | CDK1_HUMAN  |      |      | Cyclin-dependent kinase 1;                        | 0.31                            | 0.02                  | 33.90                | 0.05  |
| IQHQDMRILE  | LTPEPDRPR              | CDK13_HUMAN |      |      | Cyclin-dependent kinase                           | 0.20                            | 0.02                  | 27.20                | -1.25 |
| VQEGHTAVVS  | FLAAESDLHRR            | CDN2D_HUMAN |      |      | Cyclin-dependent kinase 4 inhibitor D;            | 5.59                            | 0.59                  | 31.70                | -4.99 |
| MMC         | GAPSATQPATAETQHIADQVR  | CYTB_HUMAN  |      |      | Cystatin-B;                                       | 0.44                            | 0.04                  | 33.40                | -0.32 |
| MMCG        | APSATQPATAETQHIADQVR   | CYTB_HUMAN  |      |      | Cystatin-B;                                       | 0.31                            | 0.03                  | 28.10                | -2.82 |
| AGSSPGKPPR  | LVGGPMDASVEEEGVRR      | CYTC_HUMAN  |      |      | Cystatin-C;                                       | 6.98                            | 1.26                  | 61.70                | -9.50 |
| AGSSPGKPPR  | LVGGPMDASVEEEGVRR      | CYTC_HUMAN  |      |      | Cystatin-C;                                       | 5.58                            | 0.35                  | 35.80                | -7.37 |
| AAGSSPGKPP  | RLVGGPMDASVEEEGVRR     | CYTC_HUMAN  |      |      | Cystatin-C;                                       | 2.11                            | 0.11                  | 54.00                | -3.39 |
| ARKQIVAGVN  | YFLDVELGR              | CYTC_HUMAN  |      |      | Cystatin-C;                                       | -0.86                           | 0.05                  | 26.50                | -2.54 |
| RKQIVAGVNY  | FLDVELGR               | CYTC_HUMAN  |      |      | Cystatin-C;                                       | -1.00                           | 0.06                  | 26.40                | -6.61 |
| CKPVFGVDCR  | TVECPPVQQTACPPDSYETQVR | CRIM1_HUMAN |      |      | Cysteine-rich motor                               | 4.90                            | 0.43                  | 67.40                | -3.01 |
| GFKRDHNGCR  | TCQCINTEELCSER         | CRIM1_HUMAN |      |      | Cysteine-rich motor neuron 1 protein;             | 1.90                            | 0.21                  | 59.10                | -5.85 |
| LLLARGTRA   | LVCLPCDESKCEEPR        | CRIM1_HUMAN |      |      | Cysteine-rich motor neuron 1 protein;             | 0.37                            | 0.01                  | 40.90                | -2.60 |
| QGGVAICFTA  | QCGEINCER              | CRIM1_HUMAN |      |      | Cysteine-rich motor                               | -1.25                           | 0.03                  | 20.30                | 0.50  |
| CRTVECPPVQ  | QTACPPDSYETQVR         | CRIM1_HUMAN |      |      | Cysteine-rich motor neuron 1 protein;             | -1.34                           | 0.07                  | 57.30                | -0.30 |
| GSYIYEKPLA  | EGPQVTGPIEVPAAR        | CRIP2_HUMAN |      |      | Cysteine-rich protein 2;                          | 2.61                            | 0.15                  | 59.50                | 4.88  |
| AGSYIYEKPL  | AEGPQVTGPIEVPAAR       | CRIP2_HUMAN |      |      | Cysteine-rich protein 2;                          | 2.40                            | 0.16                  | 59.70                | 0.68  |
| TYVGSRLRNGV | QSESLGTPR              | CRLD2_HUMAN |      |      | Cysteine-rich secretory                           | 4.75                            | 0.44                  | 28.90                | -0.80 |
| PQPQDLEFTK  | LPNGLVIASLENYSPVSR     | QCR2_HUMAN  |      |      | Cytochrome b-c1 complex subunit 2, mitochondrial; | 6.52                            | 1.26                  | 30.80                | 0.56  |

Table S5

| Non-prime  | Prime                    | Id 1        | Id 2 | Id 3 | Protein (Id1)                                     | Fold-change (log <sub>2</sub> ) | Fc standard deviation | X! Tandem hyperscore | ppm   |
|------------|--------------------------|-------------|------|------|---------------------------------------------------|---------------------------------|-----------------------|----------------------|-------|
| EDEQKMLTES | GDPEEEEEEEELVDPLTTVR     | QCR6_HUMAN  |      |      | Cytochrome b-c1 complex subunit 6, mitochondrial; | 0.29                            | 0.03                  | 89.80                | 2.06  |
| RIAREEIKKK | ILYEGTHLDPER             | FA36A_HUMAN |      |      | Cytochrome c oxidase                              | 0.38                            | 0.03                  | 37.70                | -3.65 |
| PAVAIQSVRC | YSHGSQETDEEFDAR          | COX5A_HUMAN |      |      | Cytochrome c oxidase                              | 0.48                            | 0.06                  | 57.30                | -0.28 |
| AVAIQSVRCY | SHGSQETDEEFDAR           | COX5A_HUMAN |      |      | Cytochrome c oxidase                              | 0.13                            | 0.01                  | 63.70                | -2.01 |
| PSGAAAMRSM | ASGGGVPTDEEQATGLER       | COX5B_HUMAN |      |      | Cytochrome c oxidase                              | 0.06                            | 0.00                  | 66.20                | 1.33  |
| TEEEKQQLH  | SEEFLSFFDHSTR            | DC112_HUMAN |      |      | Cytoplasmic dynein 1 intermediate chain 2;        | 1.04                            | 0.06                  | 29.30                | -1.72 |
| VPPMSPSSK  | SVSTPSEAGSQDSGDGAVGSR    | DC112_HUMAN |      |      | Cytoplasmic dynein 1                              | -0.66                           | 0.05                  | 39.30                | -3.42 |
| NAAEKLVVVG | RAGTGVDNVDLEAATR         | SERA_HUMAN  |      |      | D-3-phosphoglycerate                              | 1.28                            | 0.08                  | 36.40                | -1.02 |
| EHKALVSHNG | SLINVGSLLR               | K1967_HUMAN |      |      | DBIRD complex subunit KIAA1967;                   | 0.24                            | 0.02                  | 40.30                | -4.21 |
| WKLDVATDNF | FQNPELYIR                | DCNL1_HUMAN |      |      | DCN1-like protein 1;                              | 0.68                            | 0.03                  | 24.00                | -2.40 |
| VSQLFELEIE | ALPLDTPSSVETDISSSR       | DAXX_HUMAN  |      |      | Death domain-associated protein 6;                | 1.84                            | 0.12                  | 63.20                | -2.21 |
| VSSAGSLERD | STEVEISTGER              | DOCK7_HUMAN |      |      | Dedicator of cytokinesis                          | -0.12                           | 0.01                  | 29.80                | -1.29 |
| GAGPRGSSLA | NPVPAAPLSAPGCAAQPCR      | DNER_HUMAN  |      |      | Delta and Notch-like                              | 0.66                            | 0.05                  | 42.20                | -2.13 |
| YPGLSISLRL | TGSSAQEEASGVALGEAPDHSYES | ECH1_HUMAN  |      |      | Delta(3,5)-Delta(2,4)-                            | -1.39                           | 0.18                  | 81.90                | -0.19 |
| SAESSGQKSF | AANGIQAHPESTGSDAR        | TDIF2_HUMAN |      |      | Deoxynucleotidyltransferase terminal-interacting  | 1.18                            | 0.09                  | 32.90                | -6.15 |
| ESSGGWRDGR | ALINSPEGAVGR             | DNS2A_HUMAN |      |      | Deoxyribonuclease-2-alpha;                        | 2.67                            | 0.27                  | 43.40                | -0.16 |
| YERIVSRLRR | FGTVLTEHVAAAELGAR        | RCL_HUMAN   |      |      | Deoxyribonucleoside 5'-                           | 3.27                            | 0.15                  | 35.00                | -2.03 |
| DRIAQLICER | IFYPEIEEVQALDDTER        | DUT_HUMAN   |      |      | Deoxyuridine 5'-                                  | 2.49                            | 0.09                  | 53.30                | -6.96 |
| ETPAISPSKR | ARPAEVGGMQLR             | DUT_HUMAN   |      |      | Deoxyuridine 5'-                                  | 0.40                            | 0.03                  | 55.80                | -0.53 |
| LLICFNVGSG | LHLQVLSTR                | DSG2_HUMAN  |      |      | Desmoglein-2;                                     | 1.58                            | 0.09                  | 30.90                | -3.29 |
| KPHLVRQKR  | AWITAPVALR               | DSG2_HUMAN  |      |      | Desmoglein-2;                                     | 0.86                            | 0.05                  | 37.30                | -2.65 |
| AIKKKFQGIK | HECQANGPEDLNR            | DEST_HUMAN  |      |      | Dextrin;                                          | 1.34                            | 0.06                  | 31.30                | -2.74 |
| ALLALRLAAG | TDCPCPEPELCRPIR          | DIAC_HUMAN  |      |      | Di-N-acetylchitobiase;                            | -0.60                           | 0.05                  | 31.00                | -2.53 |
| VTIGFGVTLC | AVPIAQKSEPHSLSEALMR      | DBLOH_HUMAN |      |      | Diablo homolog, mitochondrial;                    | 0.24                            | 0.02                  | 44.10                | -1.17 |

Table S5

| Non-prime  | Prime                    | Id 1       | Id 2       | Id 3 | Protein (Id1)                   | Fold-change (log <sub>2</sub> ) | Fc standard deviation | X! Tandem hyperscore | ppm   |
|------------|--------------------------|------------|------------|------|---------------------------------|---------------------------------|-----------------------|----------------------|-------|
| GSHGLEIFQR | CYCGEGLSCR               | DKK1_HUMAN |            |      | Dickkopf-related protein 1;     | 9.64                            | 1.68                  | 48.20                | -2.40 |
| KGQEGSVCLR | SSDCASGLCCAR             | DKK1_HUMAN |            |      | Dickkopf-related protein 1;     | 5.89                            | 0.30                  | 59.80                | -2.11 |
| TLSSKMYHTK | GQEGSVCLR                | DKK1_HUMAN |            |      | Dickkopf-related protein 1;     | 4.30                            | 0.23                  | 27.00                | -2.51 |
| EIEETITESF | GNDHSTLDGYSR             | DKK1_HUMAN |            |      | Dickkopf-related protein        | 1.08                            | 0.06                  | 25.10                | -2.74 |
| NYQPYPCAED | EECGTDEYCASPTR           | DKK1_HUMAN |            |      | Dickkopf-related protein 1;     | 1.07                            | 0.12                  | 68.30                | 2.58  |
| GEVCTKQRKK | GSHGLEIFQR               | DKK1_HUMAN | DKK2_HUMAN |      | Dickkopf-related protein        | 0.81                            | 0.06                  | 39.20                | -1.19 |
| TDEYCASPTR | GGDAGVQICLACR            | DKK1_HUMAN |            |      | Dickkopf-related protein 1;     | 0.79                            | 0.09                  | 63.60                | -0.36 |
| TIDNYQPYPC | AEDEECGTDEYCASPTR        | DKK1_HUMAN |            |      | Dickkopf-related protein 1;     | 0.68                            | 0.09                  | 90.80                | -3.46 |
| HTKGQEGSVC | LRSSDCASGLCCAR           | DKK1_HUMAN |            |      | Dickkopf-related protein 1;     | 0.67                            | 0.08                  | 64.40                | -1.03 |
| DNYQPYPCAE | DEECGTDEYCASPTR          | DKK1_HUMAN |            |      | Dickkopf-related protein 1;     | 0.61                            | 0.08                  | 77.30                | -2.74 |
| NHFRGEIET  | ITESFGNDHSTLDGYSR        | DKK1_HUMAN |            |      | Dickkopf-related protein        | 0.53                            | 0.06                  | 33.70                | -1.71 |
| FRGEIETIT  | ESFGNDHSTLDGYSR          | DKK1_HUMAN |            |      | Dickkopf-related protein        | 0.52                            | 0.05                  | 32.10                | -4.71 |
| PGILYPGGNK | YQTIDNYQPYPCAEDEECGTDEYC | DKK1_HUMAN |            |      | Dickkopf-related protein        | 0.47                            | 0.04                  | 57.60                | -1.01 |
| PYPCAEDEEC | GTDEYCASPTR              | DKK1_HUMAN |            |      | Dickkopf-related protein 1;     | 0.40                            | 0.04                  | 47.50                | -4.57 |
| LYPGGNKYQT | IDNYQPYPCAEDEECGTDEYCASP | DKK1_HUMAN |            |      | Dickkopf-related protein        | 0.35                            | 0.04                  | 39.10                | -0.60 |
| CVSSDQNHFR | GEIETITESFGNDHSTLDGYSR   | DKK1_HUMAN |            |      | Dickkopf-related protein        | 0.32                            | 0.03                  | 65.20                | -3.56 |
| SDQNHFRGEI | EETITESFGNDHSTLDGYSR     | DKK1_HUMAN |            |      | Dickkopf-related protein        | -0.32                           | 0.03                  | 33.90                | -4.15 |
| DQNHFRGEIE | ETITESFGNDHSTLDGYSR      | DKK1_HUMAN |            |      | Dickkopf-related protein        | -0.34                           | 0.03                  | 24.20                | -3.88 |
| RFRTTAVCK  | DDLVTVKTPAFAESVTEGDVR    | ODO2_HUMAN |            |      | Dihydrolipoyllysine-residue     | 0.67                            | 0.03                  | 69.30                | 1.13  |
| MAP        | VLSKDSADIESILALNPR       | DPYD_HUMAN |            |      | Dihydropyrimidine dehydrogenase | 1.97                            | 0.13                  | 43.60                | -1.55 |



Table S5

| Non-prime  | Prime                  | Id 1        | Id 2       | Id 3       | Protein (Id1)                                                   | Fold-change (log <sub>2</sub> ) | Fc standard deviation | X! Tandem hyperscore | ppm   |
|------------|------------------------|-------------|------------|------------|-----------------------------------------------------------------|---------------------------------|-----------------------|----------------------|-------|
| APLTAEIQQK | ILHLPTSVDWR            | CATC_HUMAN  |            |            | Dipeptidyl peptidase 1;                                         | 0.44                            | 0.00                  | 29.80                | -1.51 |
| MATTGTP    | TADRGDAAATDDPAAR       | DPP9_HUMAN  |            |            | Dipeptidyl peptidase 9;                                         | 2.10                            | 0.11                  | 46.80                | -0.37 |
| LHQKHQRAKR | AVSHEDQFLR             | ADA10_HUMAN |            |            | Disintegrin and                                                 | 1.33                            | 0.09                  | 32.00                | -3.90 |
| LLLSWAAGMG | GQYGNPLNKYIR           | ADA10_HUMAN |            |            | Disintegrin and                                                 | 1.19                            | 0.10                  | 28.40                | -2.30 |
| GRFEGFIQTR | GGTFYVEPAER            | ADA10_HUMAN |            |            | Disintegrin and                                                 | 0.69                            | 0.03                  | 42.90                | -2.06 |
| LVWYQPDGTR | VVSEGHTLENCYQGR        | ADA15_HUMAN |            |            | Disintegrin and metalloproteinase domain-containing protein 15; | 1.55                            | 0.15                  | 43.60                | 0.93  |
| IEAGQYNLHL | YGTSVQSVR              | DLG1_HUMAN  | DLG2_HUMAN | DLG4_HUMAN | Disks large homolog 1;                                          | 1.85                            | 0.08                  | 27.70                | 7.12  |
| KRRRVTSRER | VARPLAEEPER            | DNMT1_HUMAN |            |            | DNA (cytosine-5)-                                               | 1.07                            | 0.06                  | 28.80                | -3.66 |
| CVPALELTRK | MLTYDRRSEPQVGER        | DPOLZ_HUMAN |            |            | DNA polymerase zeta catalytic subunit;                          | 3.28                            | 0.19                  | 27.30                | -0.70 |
| DAYEAEGLAL | DDEDVEELTASQR          | MCM2_HUMAN  |            |            | DNA replication licensing factor MCM2;                          | 0.11                            | 0.01                  | 48.10                | -3.06 |
| AGRGLGRMRR | GLLYDSDEEDEERPAR       | MCM2_HUMAN  |            |            | DNA replication licensing factor MCM2;                          | -0.16                           | 0.02                  | 47.40                | -0.83 |
| EEDQGIYQSK | VRELISDNQYR            | MCM3_HUMAN  |            |            | DNA replication licensing factor MCM3;                          | -0.29                           | 0.03                  | 41.90                | -1.12 |
| GRRRGPPRNY | AGEEEEEEGSGSSEGFDPATDR | DBPA_HUMAN  |            |            | DNA-binding protein A;                                          | 0.38                            | 0.02                  | 35.40                | -3.55 |
| MPKLPVELR  | ELLNPVVEFVSHPSTTCR     | PRKDC_HUMAN |            |            | DNA-dependent protein kinase catalytic subunit;                 | 0.13                            | 0.00                  | 39.60                | 0.19  |
| ARWPVAGQIR | ATQQQHDFTLTQTADGR      | PRKDC_HUMAN |            |            | DNA-dependent protein kinase catalytic subunit;                 | -0.73                           | 0.10                  | 40.10                | -0.41 |
| YTIDSDWRFR | STVLTPMFVETQASQGTQTR   | PRKDC_HUMAN |            |            | DNA-dependent protein                                           | -0.73                           | 0.05                  | 48.00                | 2.57  |
| MEPD       | GTYEPGFVGIR            | RPB9_HUMAN  |            |            | DNA-directed RNA polymerase II subunit                          | -0.08                           | 0.01                  | 31.20                | -2.76 |
| M          | GKDYYQTLGLAR           | DNJB1_HUMAN |            |            | DnaJ homolog subfamily                                          | 0.34                            | 0.03                  | 37.20                | -5.64 |

Table S5

| Non-prime   | Prime                 | Id 1        | Id 2        | Id 3 | Protein (Id1)                             | Fold-change (log <sub>2</sub> ) | Fc standard deviation | X! Tandem hyperscore | ppm   |
|-------------|-----------------------|-------------|-------------|------|-------------------------------------------|---------------------------------|-----------------------|----------------------|-------|
| M           | VDYYEVLGVQR           | DNJB6_HUMAN |             |      | DnaJ homolog subfamily B member 6;        | -0.14                           | 0.01                  | 36.00                | -2.18 |
| QQRQLGQR    | QPPPSEPTQGPEIVPR      | DNJC4_HUMAN |             |      | DnaJ homolog subfamily C member 4;        | -2.34                           | 0.12                  | 31.10                | -2.38 |
| GTWAPAPGSA  | SSEAPPLINEDVKR        | RPN1_HUMAN  |             |      | Dolichyl-diphosphooligosaccharide-protein | 4.39                            | 0.24                  | 29.90                | -3.51 |
| AAPGEFRAM   | EMPSFYSHGLPR          | DSRAD_HUMAN |             |      | Double-stranded RNA-                      | 0.21                            | 0.01                  | 27.90                | -1.10 |
| NLAKNIGLTK  | ARDINAVLIDMER         | DSRAD_HUMAN |             |      | Double-stranded RNA-                      | 0.00                            | 0.00                  | 38.40                | 0.64  |
| RMAPTPIPTR  | SPSDSSTASTPVAEQIER    | DREB_HUMAN  |             |      | Drebrin;                                  | 4.85                            | 0.70                  | 55.10                | 1.85  |
| RRMAPTIPT   | RSPDSSTASTPVAEQIER    | DREB_HUMAN  |             |      | Drebrin;                                  | 1.77                            | 0.12                  | 48.40                | -0.68 |
| ETRAAAPQAW  | AGPMEPPQAQAPPR        | DREB_HUMAN  |             |      | Drebrin;                                  | 1.46                            | 0.07                  | 41.50                | -6.54 |
| VLAENNQLLK  | EADDVGPR              | DYH5_HUMAN  |             |      | Dynein heavy chain 5, axonemal;           | -3.25                           | 0.00                  | 24.00                | -9.96 |
| LTMKAKSTVR  | DIDPQNDLTLFLR         | DLRB1_HUMAN | DLRB2_HUMAN |      | Dynein light chain                        | 2.90                            | 0.22                  | 37.10                | 0.27  |
| FSEVELHNMK  | LVPVVNNR              | DAG1_HUMAN  |             |      | Dystroglycan;                             | 3.11                            | 0.20                  | 24.80                | -1.81 |
| VENGALLSWK  | LGCSLNQNSVPDIHGVEAPAR | DAG1_HUMAN  |             |      | Dystroglycan;                             | 2.12                            | 0.20                  | 72.40                | 1.02  |
| WKLGC SLNQN | SVPDIHGVEAPAR         | DAG1_HUMAN  |             |      | Dystroglycan;                             | -0.16                           | 0.01                  | 36.50                | -3.61 |
| HIPQTSSVFS  | IEVYPEDHSELQSVR       | DAG1_HUMAN  |             |      | Dystroglycan;                             | -0.18                           | 0.02                  | 25.60                | -1.14 |
| GALLSWKLGC  | SLNQNSVPDIHGVEAPAR    | DAG1_HUMAN  |             |      | Dystroglycan;                             | -0.27                           | 0.02                  | 51.60                | -0.62 |
| IPQTSSVFSI  | EVYPEDHSELQSVR        | DAG1_HUMAN  |             |      | Dystroglycan;                             | -1.25                           | 0.06                  | 36.30                | -4.00 |
| DYLPAMRRRR  | SSDPLGDTASNLGSAVDELMR | HUWE1_HUMAN |             |      | E3 ubiquitin-protein ligase HUWE1;        | -0.08                           | 0.01                  | 43.40                | -1.85 |
| DADARVAITI  | YCQASEEFLNGR          | MGRN1_HUMAN |             |      | E3 ubiquitin-protein ligase MGRN1;        | -2.79                           | 0.19                  | 22.90                | -1.46 |

Table S5

| Non-prime  | Prime               | Id 1        | Id 2        | Id 3        | Protein (Id1)                               | Fold-change (log <sub>2</sub> ) | Fc standard deviation | X! Tandem hyperscore | ppm   |
|------------|---------------------|-------------|-------------|-------------|---------------------------------------------|---------------------------------|-----------------------|----------------------|-------|
| VEQFLQADLA | REPPADVWTPPAR       | TRI25_HUMAN |             |             | E3 ubiquitin/ISG15 ligase                   | 0.14                            | 0.00                  | 33.50                | -0.98 |
| QLQQEYTEMK | ALLDASETTSTR        | TRI25_HUMAN |             |             | E3 ubiquitin/ISG15 ligase                   | -0.76                           | 0.06                  | 52.70                | -3.46 |
| HSNDQSPQIR | ASPSPQPSSQPLQIHR    | EMAL4_HUMAN |             |             | Echinoderm microtubule-                     | 0.31                            | 0.03                  | 31.10                | -5.55 |
| PKPEPEPPAR | APTASADAELSAQLSR    | EFHD1_HUMAN |             |             | EF-hand domain-containing protein D1;       | -2.08                           | 0.26                  | 38.50                | -9.30 |
| DCELSAKLLR | RADLNQIGIGEPQSPSR   | EFHD2_HUMAN |             |             | EF-hand domain-containing protein D2;       | 0.44                            | 0.03                  | 44.80                | 2.21  |
| GGGAGTYRVG | SAQPSPPDDL DAGGLAQR | EH1L1_HUMAN |             |             | EH domain-binding                           | 3.32                            | 0.23                  | 30.40                | 2.08  |
| APPAGLGSAR | ETQAQACPQEGTEAHGAR  | EH1L1_HUMAN |             |             | EH domain-binding                           | 1.48                            | 0.15                  | 56.90                | -0.56 |
| TPGTETEVLG | TQKTEAGGSGVLQTR     | EH1L1_HUMAN |             |             | EH domain-binding                           | 0.96                            | 0.11                  | 34.70                | -1.26 |
| IEVGLLGVLG | IETGAAEGAILGTQEIASR | EH1L1_HUMAN |             |             | EH domain-binding                           | 0.87                            | 0.11                  | 36.00                | 4.38  |
| RPPETSPEMR | SSRQPAQDTAPTAPR     | EH1L1_HUMAN |             |             | EH domain-binding protein 1-like protein 1; | -0.08                           | 0.01                  | 28.40                | -2.86 |
| VKQLIVGVNK | MDSTEPPYSQKR        | EF1A1_HUMAN | EF1A3_HUMAN |             | Elongation factor 1-alpha 1;                | 4.77                            | 0.35                  | 33.30                | -0.27 |
| RPTDKPLRLP | LQDVYKIGGIGTVPVGR   | EF1A1_HUMAN | EF1A2_HUMAN | EF1A3_HUMAN | Elongation factor 1-alpha                   | 1.19                            | 0.07                  | 29.20                | -1.97 |
| DKPLRLPLQD | VYKIGGIGTVPVGR      | EF1A1_HUMAN | EF1A2_HUMAN | EF1A3_HUMAN | Elongation factor 1-alpha 1;                | 0.76                            | 0.04                  | 25.10                | -4.51 |
| TDKPLRLPLQ | DVYKIGGIGTVPVGR     | EF1A1_HUMAN | EF1A2_HUMAN | EF1A3_HUMAN | Elongation factor 1-alpha                   | 0.73                            | 0.04                  | 32.50                | -6.29 |
| RLPLQDVYKI | GGIGTVPVGR          | EF1A1_HUMAN | EF1A2_HUMAN | EF1A3_HUMAN | Elongation factor 1-alpha                   | 0.55                            | 0.04                  | 37.50                | -3.40 |
| LRLPLQDVYK | IGGIGTVPVGR         | EF1A1_HUMAN | EF1A2_HUMAN | EF1A3_HUMAN | Elongation factor 1-alpha 1;                | -0.52                           | 0.02                  | 34.60                | -3.30 |
| VDMVPGKPMC | VESFSDYPLGR         | EF1A1_HUMAN | EF1A3_HUMAN |             | Elongation factor 1-alpha 1;                | -0.58                           | 0.01                  | 27.00                | -1.85 |
| ISLWKFETSK | YYVTIIDAPGHR        | EF1A1_HUMAN | EF1A3_HUMAN |             | Elongation factor 1-alpha 1;                | -0.69                           | 0.02                  | 30.10                | -4.10 |
| SLWKFETSKY | YVTIIDAPGHR         | EF1A1_HUMAN | EF1A3_HUMAN |             | Elongation factor 1-alpha                   | -0.93                           | 0.07                  | 27.30                | -3.91 |
| LWKFETSKYY | VTIIDAPGHR          | EF1A1_HUMAN | EF1A3_HUMAN |             | Elongation factor 1-alpha                   | -3.25                           | 0.31                  | 22.10                | -2.15 |
| VKQLIVGVNK | MDSTEPAYSEKR        | EF1A2_HUMAN |             |             | Elongation factor 1-alpha 2;                | 2.09                            | 0.08                  | 27.70                | -2.72 |
| TDSKDDDDID | LFGSDDEESEEAKR      | EF1B_HUMAN  |             |             | Elongation factor 1-beta;                   | -0.42                           | 0.04                  | 33.10                | -1.89 |
| VLEKSSPGHR | ATAPQTQHVSPMR       | EF1D_HUMAN  |             |             | Elongation factor 1-delta;                  | 2.71                            | 0.22                  | 30.30                | -2.95 |

Table S5

| Non-prime  | Prime                    | Id 1        | Id 2 | Id 3 | Protein (Id1)                         | Fold-change (log <sub>2</sub> ) | Fc standard deviation | X! Tandem hyperscore | ppm   |
|------------|--------------------------|-------------|------|------|---------------------------------------|---------------------------------|-----------------------|----------------------|-------|
| SGDHGELVVR | IASLEVENQSLR             | EF1D_HUMAN  |      |      | Elongation factor 1-delta;            | 1.76                            | 0.24                  | 58.80                | -1.01 |
| VILRDIARAR | ENIQKSLAGSSGPGASSGTSGDHG | EF1D_HUMAN  |      |      | Elongation factor 1-delta;            | 0.75                            | 0.07                  | 48.50                | -0.17 |
| RENIQKSLAG | SSGPGASSGTSGDHGELVVR     | EF1D_HUMAN  |      |      | Elongation factor 1-delta;            | 0.67                            | 0.07                  | 45.70                | -1.74 |
| RARENIQKSL | AGSSGPGASSGTSGDHGELVVR   | EF1D_HUMAN  |      |      | Elongation factor 1-delta;            | 0.61                            | 0.06                  | 75.70                | -1.44 |
| ARARENIQKS | LAGSSGPGASSGTSGDHGELVVR  | EF1D_HUMAN  |      |      | Elongation factor 1-delta;            | 0.61                            | 0.06                  | 66.10                | -1.22 |
| YEQMNGPVAG | ASRQENGASVILR            | EF1D_HUMAN  |      |      | Elongation factor 1-delta;            | 0.20                            | 0.01                  | 28.00                | -1.60 |
| IARARENIQK | SLAGSSGPGASSGTSGDHGELVVR | EF1D_HUMAN  |      |      | Elongation factor 1-delta;            | -0.79                           | 0.08                  | 73.90                | -2.03 |
| ARENIQKSLA | GSSGPGASSGTSGDHGELVVR    | EF1D_HUMAN  |      |      | Elongation factor 1-delta;            | -1.34                           | 0.14                  | 40.20                | 1.54  |
| DYESYTWKRL | DPGSEETQTLVR             | EF1G_HUMAN  |      |      | Elongation factor 1-gamma;            | -0.93                           | 0.07                  | 56.40                | -1.02 |
| VVAGFQWATK | EGALCEENMR               | EF2_HUMAN   |      |      | Elongation factor 2;                  | 2.99                            | 0.27                  | 31.80                | 0.73  |
| M          | VNFTVDQIR                | EF2_HUMAN   |      |      | Elongation factor 2;                  | 0.48                            | 0.07                  | 35.60                | -3.73 |
| RALLELQLEP | EELYQTFQR                | EF2_HUMAN   |      |      | Elongation factor 2;                  | -9.97                           | 0.00                  | 20.80                | -0.56 |
| LAEGGGAKFK | KYEEIDNAPEER             | EFTU_HUMAN  |      |      | Elongation factor Tu,                 | 0.11                            | 0.01                  | 36.40                | -3.58 |
| SCSLSPSLA  | ETVHCDLQPVGPER           | EGLN_HUMAN  |      |      | Endoglin;                             | 0.64                            | 0.06                  | 32.70                | -4.62 |
| MMKREYRGQR | SVKALADYIR               | ERP44_HUMAN |      |      | Endoplasmic reticulum                 | 0.72                            | 0.03                  | 24.70                | -2.93 |
| VLLTFGSVRA | DDEVVDVGTVEEDLGKSR       | ENPL_HUMAN  |      |      | Endoplasmic;                          | 1.32                            | 0.12                  | 51.80                | -2.83 |
| GLVRLVHQER | TLAFPLTIR                | EPCR_HUMAN  |      |      | Endothelial protein C                 | 1.23                            | 0.08                  | 28.20                | -2.62 |
| ILLSGWAFK  | SQDASDGLQR               | EPCR_HUMAN  |      |      | Endothelial protein C                 | 0.21                            | 0.00                  | 43.70                | -1.54 |
| VYFCHLDIIV | VNTPEHVVPYGLGSPR         | EDN1_HUMAN  |      |      | Endothelin-1;                         | -1.08                           | 0.05                  | 33.80                | -1.19 |
| LAAGLVACLA | ALGIQYQTR                | ECE1_HUMAN  |      |      | Endothelin-converting                 | 2.69                            | 0.11                  | 36.40                | -2.87 |
| TFGESRPELG | SEGLGSAAHGSQPDLR         | EDC4_HUMAN  |      |      | Enhancer of mRNA-decapping protein 4; | 1.50                            | 0.08                  | 30.50                | -2.35 |
| PVRCPAWRPF | ASGANFEYIIAEKR           | ECHM_HUMAN  |      |      | Enoyl-CoA hydratase,                  | 0.87                            | 0.09                  | 35.40                | -4.00 |

Table S5

| Non-prime  | Prime               | Id 1        | Id 2        | Id 3 | Protein (Id1)                                       | Fold-change (log <sub>2</sub> ) | Fc standard deviation | X! Tandem hyperscore | ppm   |
|------------|---------------------|-------------|-------------|------|-----------------------------------------------------|---------------------------------|-----------------------|----------------------|-------|
| QAHDNPQEK  | LAADDPEVR           | EFNA1_HUMAN |             |      | Ephrin-A1;                                          | 3.50                            | 0.19                  | 30.00                | -0.39 |
| QPQRHFRVER | SQPVSQPLTYESGPDEV   | ES8L2_HUMAN |             |      | Epidermal growth factor receptor kinase substrate 8 | 0.61                            | 0.05                  | 40.60                | -1.14 |
| AQPQRHFRVE | RSQPVSQPLTYESGPDEV  | ES8L2_HUMAN |             |      | Epidermal growth factor                             | 0.53                            | 0.06                  | 49.40                | 1.61  |
| LRLLQEREL  | VEPLTPSGEAPNQALLR   | EGFR_HUMAN  |             |      | Epidermal growth factor                             | 1.79                            | 0.16                  | 42.90                | -0.44 |
| VACIDRNLQ  | SCPIKEDSFLQR        | EGFR_HUMAN  |             |      | Epidermal growth factor                             | 0.79                            | 0.08                  | 23.90                | -3.84 |
| ATNIKHFKN  | TSISGDLHILPVAFR     | EGFR_HUMAN  |             |      | Epidermal growth factor receptor;                   | -0.02                           | 0.00                  | 34.00                | -0.12 |
| QQCSGRCRGK | SPSDCCHNQCAAGCTGPR  | EGFR_HUMAN  |             |      | Epidermal growth factor                             | -0.52                           | 0.06                  | 24.30                | -0.14 |
| GRCRCPAGWR | GDTQCSDVDECSAR      | EGFL7_HUMAN |             |      | Epidermal growth factor-like protein 7;             | 1.58                            | 0.05                  | 55.80                | 0.37  |
| RPGRRVCAVR | AHGDPVSESFVQR       | EGFL7_HUMAN |             |      | Epidermal growth factor-like protein 7;             | 1.12                            | 0.12                  | 44.20                | -0.82 |
| RYACCPGWKR | TSGLPGACGAAICQPPCR  | EGFL7_HUMAN |             |      | Epidermal growth factor-like protein 7;             | 1.07                            | 0.11                  | 95.60                | 0.79  |
| PRYACCPGWK | RTSGLPGACGAAICQPPCR | EGFL7_HUMAN |             |      | Epidermal growth factor-like protein 7;             | 1.05                            | 0.08                  | 66.90                | -0.87 |
| QPGRCRCPAG | WRGDTQCSDVDECSAR    | EGFL7_HUMAN |             |      | Epidermal growth factor-like protein 7;             | 0.79                            | 0.10                  | 40.70                | -1.12 |
| DPVSESFVQR | VYQPFLTTCDGHR       | EGFL7_HUMAN |             |      | Epidermal growth factor-like protein 7;             | 0.34                            | 0.02                  | 42.20                | -3.20 |
| PVSESFVQRV | YQPFLTTCDGHR        | EGFL7_HUMAN |             |      | Epidermal growth factor-                            | -0.32                           | 0.02                  | 35.10                | -1.57 |
| VRGSLAEAVG | SPPPAATPTPTPTR      | EPN1_HUMAN  |             |      | Epsin-1;                                            | 1.64                            | 0.05                  | 44.70                | -0.07 |
| AVWLLSSGHG | EEQPPETAAQR         | ERO1A_HUMAN |             |      | ERO1-like protein alpha;                            | 0.32                            | 0.01                  | 52.60                | -3.18 |
| EKNRETWYLS | WALDTNQEER          | ERF3A_HUMAN | ERF3B_HUMAN |      | Eukaryotic peptide chain release factor GTP-        | -0.14                           | 0.01                  | 26.30                | -1.93 |
| GVFNVQMEPK | VVTDTDETELAR        | IF2A_HUMAN  |             |      | Eukaryotic translation initiation factor 2 subunit  | -0.16                           | 0.02                  | 47.60                | -1.23 |
| AKKAAKQEAR | SDKSPDLAPTAPQSTPR   | EIF2A_HUMAN |             |      | Eukaryotic translation initiation factor 2A;        | 1.20                            | 0.10                  | 42.10                | 6.71  |
|            | M APSTPLLTVR        | EIF2A_HUMAN |             |      | Eukaryotic translation initiation factor 2A;        | -0.27                           | 0.02                  | 16.80                | -2.75 |
| GEVHQAREDK | SLSEAPEDTSTR        | EIF2D_HUMAN |             |      | Eukaryotic translation                              | -1.44                           | 0.04                  | 28.60                | -0.15 |

Table S5

| Non-prime  | Prime                 | Id 1        | Id 2        | Id 3 | Protein (Id1)                                      | Fold-change (log <sub>2</sub> ) | Fc standard deviation | X! Tandem hyperscore | ppm   |
|------------|-----------------------|-------------|-------------|------|----------------------------------------------------|---------------------------------|-----------------------|----------------------|-------|
| PAAEELPGSH | AEPVPAQGEAPGEQAR      | EIF3B_HUMAN |             |      | Eukaryotic translation                             | 0.91                            | 0.08                  | 63.30                | -2.25 |
| MQDAEN     | VAVPEAAEER            | EIF3B_HUMAN |             |      | Eukaryotic translation initiation factor 3 subunit | -0.18                           | 0.01                  | 33.40                | -3.00 |
| AKKKHDRKSK | RLDEEEEDNEGGEWER      | EIF3C_HUMAN |             |      | Eukaryotic translation                             | -0.39                           | 0.03                  | 53.40                | -4.68 |
| LAKETFGVNN | AVYGIDAMNPSSR         | EIF3J_HUMAN |             |      | Eukaryotic translation initiation factor 3 subunit | 0.23                            | 0.01                  | 56.40                | -3.05 |
| FSKEVEERSR | ERPSQPEGLR            | IF4G1_HUMAN |             |      | Eukaryotic translation                             | 1.59                            | 0.11                  | 31.90                | 2.67  |
| TGVAPTIVLM | NQPPQIAPKR            | IF4G1_HUMAN |             |      | Eukaryotic translation                             | 1.31                            | 0.12                  | 19.50                | -0.98 |
| SSASTSQSTR | AASIFGGAKPVDTAAR      | IF4B_HUMAN  |             |      | Eukaryotic translation                             | 0.71                            | 0.08                  | 29.10                | -2.50 |
| GFGYAEFEDL | DSLLSALSLSNEESLGNRR   | IF4B_HUMAN  |             |      | Eukaryotic translation                             | 0.49                            | 0.03                  | 31.60                | -0.85 |
| VLGDGVQLPP | GDYSTTPGGTLFSTTPGGTR  | 4EBP1_HUMAN |             |      | Eukaryotic translation                             | -1.25                           | 0.12                  | 54.50                | 0.20  |
| SRFRDGPPLR | GSNMDFREPTTEER        | IF4H_HUMAN  |             |      | Eukaryotic translation                             | 1.28                            | 0.07                  | 27.00                | -1.80 |
| KPRTVATPLN | QVANPNSAIFGGARPR      | IF4H_HUMAN  |             |      | Eukaryotic translation initiation factor 4H;       | 0.86                            | 0.07                  | 28.60                | -0.53 |
| VEFDEVDSLK | EALTYDGALLGDR         | IF4H_HUMAN  |             |      | Eukaryotic translation                             | 0.02                            | 0.00                  | 47.70                | -0.35 |
| RMDEISDHAK | VLTLSDDLER            | IF5_HUMAN   |             |      | Eukaryotic translation initiation factor 5;        | 0.04                            | 0.00                  | 26.80                | -1.92 |
| IKRNDFQLIG | IQDGYLSLLQDSGEVR      | IF5A1_HUMAN |             |      | Eukaryotic translation initiation factor 5A-1;     | 1.43                            | 0.08                  | 76.50                | 0.82  |
| NDFQLIGIQD | GYLSLLQDSGEVR         | IF5A1_HUMAN |             |      | Eukaryotic translation initiation factor 5A-1;     | 1.07                            | 0.07                  | 59.50                | -0.82 |
| KRNDFQLIGI | QDGYLSLLQDSGEVR       | IF5A1_HUMAN |             |      | Eukaryotic translation initiation factor 5A-1;     | -0.29                           | 0.03                  | 65.40                | 2.16  |
| MADDLD     | FETGDAGASATFPMQCSALR  | IF5A1_HUMAN | IF5AL_HUMAN |      | Eukaryotic translation                             | -0.55                           | 0.03                  | 98.30                | -2.09 |
| ADDLDFETGD | AGASATFPMQCSALR       | IF5A1_HUMAN | IF5AL_HUMAN |      | Eukaryotic translation initiation factor 5A-1;     | -0.63                           | 0.02                  | 66.00                | -0.25 |
| TTDQELQHIR | NSLPDTVQIR            | IF6_HUMAN   |             |      | Eukaryotic translation initiation factor 6;        | 1.62                            | 0.12                  | 37.10                | -0.68 |
| QLRQHSPQPG | VALLALEEER            | EXTL1_HUMAN |             |      | Exostosin-like 1;                                  | 1.44                            | 0.06                  | 25.80                | -1.37 |
| EDNSEEYIRR | DLEGSIDTR             | XPO2_HUMAN  |             |      | Exportin-2;                                        | 3.60                            | 0.42                  | 44.30                | 0.26  |
| SYSHSSSSLS | EEPELSSGGPPHITSSAPELR | ESYT1_HUMAN |             |      | Extended synaptotagmin-1;                          | 0.62                            | 0.04                  | 38.60                | -1.50 |

Table S5

| Non-prime  | Prime                     | Id 1        | Id 2        | Id 3       | Protein (Id1)                            | Fold-change (log <sub>2</sub> ) | Fc standard deviation | X! Tandem hyperscore | ppm   |
|------------|---------------------------|-------------|-------------|------------|------------------------------------------|---------------------------------|-----------------------|----------------------|-------|
| AVRGANTHLS | TFSFTKVDVGQQPLR           | ESYT2_HUMAN |             |            | Extended synaptotagmin-2;                | -4.68                           | 0.00                  | 35.70                | -3.68 |
| VLTYLAVASA | ASEGGFTATGQR              | ECM1_HUMAN  |             |            | Extracellular matrix                     | 0.84                            | 0.05                  | 54.60                | -1.48 |
| MVFLVACALH | IALDLLPR                  | DMP4_HUMAN  |             |            | Extracellular                            | -1.25                           | 0.06                  | 28.80                | -4.34 |
| ASYVRSRSIR | SVAIEVDGR                 | SULF2_HUMAN |             |            | Extracellular sulfatase Sulf-2;          | 0.38                            | 0.02                  | 44.90                | -4.72 |
| RSVAIEVDGR | VYHVGLGDAAQPR             | SULF2_HUMAN |             |            | Extracellular sulfatase Sulf-2;          | 0.14                            | 0.01                  | 42.10                | -3.04 |
| ALQLEERKR  | AQEEAERLEADR              | EZRI_HUMAN  |             |            | Ezrin;                                   | 5.14                            | 0.93                  | 35.80                | -0.83 |
| ERELSEQIQR | ALQLEEER                  | EZRI_HUMAN  |             |            | Ezrin;                                   | 3.46                            | 0.08                  | 34.10                | -4.13 |
| EAEKNERVQR | QLLTLSSSELSQAR            | EZRI_HUMAN  |             |            | Ezrin;                                   | 2.61                            | 0.25                  | 46.90                | 0.34  |
| ALLEEARRRK | EDEVEEWQHR                | EZRI_HUMAN  |             |            | Ezrin;                                   | 1.53                            | 0.16                  | 51.00                | -2.24 |
| YEHDDKLTPI | IGFPWSEIR                 | EZRI_HUMAN  | MOES_HUMAN  | RADI_HUMAN | Ezrin;                                   | 1.17                            | 0.04                  | 25.20                | -1.85 |
| EHDDKLTPI  | GFPWSEIR                  | EZRI_HUMAN  | MOES_HUMAN  | RADI_HUMAN | Ezrin;                                   | 1.00                            | 0.03                  | 25.30                | -3.60 |
| VSYHVQESLQ | DEGAEPTGYSAELSSEGIR       | EZRI_HUMAN  |             |            | Ezrin;                                   | 0.90                            | 0.09                  | 97.70                | -0.85 |
| YEPVSYHVQE | SLQDEGAEPTGYSAELSSEGIRDDI | EZRI_HUMAN  |             |            | Ezrin;                                   | 0.79                            | 0.09                  | 30.50                | -1.14 |
| YEPVSYHVQE | SLQDEGAEPTGYSAELSSEGIR    | EZRI_HUMAN  |             |            | Ezrin;                                   | 0.74                            | 0.08                  | 112.00               | -2.83 |
| LQDYEEKTKK | AERELSEQIQR               | EZRI_HUMAN  |             |            | Ezrin;                                   | 0.28                            | 0.01                  | 25.60                | -3.37 |
| VIKPIDKKAP | DFVIFYAPR                 | EZRI_HUMAN  | MOES_HUMAN  | RADI_HUMAN | Ezrin;                                   | 0.06                            | 0.00                  | 30.60                | -5.72 |
| EFNEVFNDVR | LLLNNNDLLR                | CAZA1_HUMAN | CAZA2_HUMAN |            | F-actin-capping protein subunit alpha-1; | 2.34                            | 0.13                  | 47.70                | -2.12 |
| NNHTDMMEVD | GDVEIPPNAKAVVLR           | TBL1R_HUMAN |             |            | F-box-like/WD repeat-containing protein  | 0.11                            | 0.00                  | 31.40                | -3.04 |
| LPAESVTRVL | QPAVPVAALR                | FBXL8_HUMAN |             |            | F-box/LRR-repeat protein                 | -1.44                           | 0.12                  | 26.90                | -7.85 |

Table S5

| Non-prime  | Prime                | Id 1        | Id 2 | Id 3 | Protein (Id1)                               | Fold-change (log <sub>2</sub> ) | Fc standard deviation | X! Tandem hyperscore | ppm   |
|------------|----------------------|-------------|------|------|---------------------------------------------|---------------------------------|-----------------------|----------------------|-------|
| IAQITGPPDR | CQHAAEIITDLLR        | FUBP1_HUMAN |      |      | Far upstream element-                       | 2.64                            | 0.06                  | 30.70                | -2.23 |
| KPDDGTTPER | IAQITGPPDR           | FUBP1_HUMAN |      |      | Far upstream element-binding protein 1;     | 2.05                            | 0.06                  | 30.80                | -2.28 |
| GFREVRNEYG | SRIGGNEGIDVPIPR      | FUBP1_HUMAN |      |      | Far upstream element-binding protein 1;     | 0.20                            | 0.01                  | 42.00                | 2.92  |
| PESKKLASQG | DSISSQLGPIHPPPR      | FUBP2_HUMAN |      |      | Far upstream element-binding protein 2;     | 0.40                            | 0.01                  | 37.60                | -0.43 |
| ESKKLASQGD | SISSQLGPIHPPPR       | FUBP2_HUMAN |      |      | Far upstream element-                       | 0.34                            | 0.02                  | 40.80                | -2.04 |
| EDGDQPESKK | LASQGDSISSQLGPIHPPPR | FUBP2_HUMAN |      |      | Far upstream element-binding protein 2;     | 0.20                            | 0.01                  | 28.30                | 0.96  |
| FVQHFSQIVR | VLTEDEMGHPEIGDAIAR   | FPPS_HUMAN  |      |      | Farnesyl pyrophosphate synthase;            | 1.36                            | 0.10                  | 34.40                | -4.03 |
| LEREERNQTQ | VLRQQQDEAYLASLR      | FAF2_HUMAN  |      |      | FAS-associated factor 2;                    | 0.53                            | 0.05                  | 37.90                | -1.98 |
| PGLDGAQIPR | DPSQQELPR            | FAS_HUMAN   |      |      | Fatty acid synthase;                        | 4.82                            | 0.65                  | 52.60                | -4.28 |
| AQQTQLNLR  | SLLVNPEGPTLMR        | FAS_HUMAN   |      |      | Fatty acid synthase;                        | 1.57                            | 0.39                  | 37.10                | -9.69 |
| GLKMVVPGLD | GAQIPRDPSQQELPR      | FAS_HUMAN   |      |      | Fatty acid synthase;                        | -0.14                           | 0.01                  | 32.20                | -1.68 |
| MTTASTSQVR | QNYHQDSEAAINR        | FRIH_HUMAN  |      |      | Ferritin heavy chain;                       | 1.38                            | 0.12                  | 38.30                | 1.33  |
| LAQGRAETLA | GAMPNEAGGHPDAR       | FHOD1_HUMAN |      |      | FH1/FH2 domain-containing protein 1;        | -0.39                           | 0.04                  | 29.90                | -1.49 |
| HPRPDITWMK | DDQALTRPEAAEPR       | FGRL1_HUMAN |      |      | Fibroblast growth factor                    | -0.66                           | 0.06                  | 38.00                | -3.18 |
| RKDFPESSLK | LVSSTLFGNTKPR        | FGFP1_HUMAN |      |      | Fibroblast growth factor-binding protein 1; | -1.29                           | 0.10                  | 22.80                | -2.75 |
| RDQPFTILYR | DMDVVSGR             | FBLN5_HUMAN |      |      | Fibulin-5;                                  | 1.86                            | 0.15                  | 31.30                | -0.77 |
| RLSPFMADIR | DAPQDFHPDR           | FLNA_HUMAN  |      |      | Filamin-A;                                  | 4.29                            | 0.52                  | 23.40                | 2.53  |



Table S5

| Non-prime  | Prime                 | Id 1        | Id 2 | Id 3 | Protein (Id1)                  | Fold-change (log <sub>2</sub> ) | Fc standard deviation | X! Tandem hyperscore | ppm   |
|------------|-----------------------|-------------|------|------|--------------------------------|---------------------------------|-----------------------|----------------------|-------|
| VRAGGPGLER | AEAGVPAEFSIWTR        | FLNA_HUMAN  |      |      | Filamin-A;                     | 2.44                            | 0.18                  | 32.10                | 0.70  |
| QTGGPHVKAR | VANPSGNLTETYVQDR      | FLNA_HUMAN  |      |      | Filamin-A;                     | 1.51                            | 0.13                  | 87.10                | -1.39 |
| DVTYDGPVVP | SSPFQVPVTEGCDPSR      | FLNA_HUMAN  |      |      | Filamin-A;                     | 1.47                            | 0.10                  | 49.90                | -3.18 |
| LHSVDVTYDG | SPVPSSPFQVPVTEGCDPSR  | FLNA_HUMAN  |      |      | Filamin-A;                     | 0.69                            | 0.07                  | 60.50                | -0.87 |
| TQTVNYVPSR | EGPYSISVLYGDEEVPR     | FLNA_HUMAN  |      |      | Filamin-A;                     | 0.28                            | 0.01                  | 73.00                | 0.72  |
| LTQTGGPHVK | ARVANPSGNLTETYVQDR    | FLNA_HUMAN  |      |      | Filamin-A;                     | 0.02                            | 0.00                  | 66.60                | -2.42 |
| FNEEHIPDSP | FVVPVASPSGDAR         | FLNA_HUMAN  |      |      | Filamin-A;                     | -0.18                           | 0.01                  | 41.50                | -4.71 |
| LVEPVDVVDN | ADGTQTVNYVPSR         | FLNA_HUMAN  |      |      | Filamin-A;                     | -0.25                           | 0.01                  | 49.90                | -2.15 |
| GLHSVDVTYD | GSPVPSSPFQVPVTEGCDPSR | FLNA_HUMAN  |      |      | Filamin-A;                     | -0.76                           | 0.04                  | 67.80                | 2.51  |
| PFKAKVTGQR | LVSPGSANETSSILVESVTR  | FLNB_HUMAN  |      |      | Filamin-B;                     | 5.73                            | 0.94                  | 81.70                | 3.08  |
| NEHLKCVNKR | IGNLQTDLSGDLR         | FLNB_HUMAN  |      |      | Filamin-B;                     | 1.82                            | 0.09                  | 46.60                | -5.59 |
| GELVPHFPAR | VKVEPAVDTSR           | FLNB_HUMAN  |      |      | Filamin-B;                     | 1.39                            | 0.06                  | 29.50                | -2.94 |
| FTVDCSQAGR | APLQVAVLGPTGVAEPVEVR  | FLNC_HUMAN  |      |      | Filamin-C;                     | 5.23                            | 1.00                  | 63.50                | -0.10 |
| ETKREVRVEE | STQVGDPFPAVFGDFLGR    | FLNC_HUMAN  |      |      | Filamin-C;                     | 0.00                            | 0.00                  | 97.80                | 1.45  |
| DVLQAADVDK | TVAGQDAVIVLLGTR       | BLVRB_HUMAN |      |      | Flavin reductase (NADPH);      | -0.16                           | 0.01                  | 56.20                | -0.90 |
| ACRMLGGRPR | CECAPDCSGLPAR         | FSTL3_HUMAN |      |      | Follistatin-related protein 3; | 5.99                            | 0.82                  | 51.10                | -2.10 |
| APDCSGLPAR | LQVCGSDGATYRDECELR    | FSTL3_HUMAN |      |      | Follistatin-related protein    | 3.71                            | 0.38                  | 30.20                | -1.57 |
| CRMLGGRPRC | ECAPDCSGLPAR          | FSTL3_HUMAN |      |      | Follistatin-related protein 3; | -1.00                           | 0.08                  | 41.40                | -3.73 |
| EGSEGSEGSF | RSHESPSDTEEDDR        | FOXN3_HUMAN |      |      | Forkhead box protein N3;       | -5.27                           | 0.00                  | 20.70                | -0.41 |
| GSLKTFRALL | TLAAGADGPPR           | FJX1_HUMAN  |      |      | Four-jointed box protein       | -0.44                           | 0.03                  | 48.00                | -5.22 |

Table S5

| Non-prime  | Prime                 | Id 1        | Id 2        | Id 3 | Protein (Id1)                                     | Fold-change (log <sub>2</sub> ) | Fc standard deviation | X! Tandem hyperscore | ppm   |
|------------|-----------------------|-------------|-------------|------|---------------------------------------------------|---------------------------------|-----------------------|----------------------|-------|
| SGRSGGSDK  | AGYSTDESSSSLHATR      | FXR2_HUMAN  |             |      | Fragile X mental retardation syndrome-            | -0.10                           | 0.01                  | 26.80                | 0.95  |
| QSVYLMNLRK | SGTLGHPGSLDETTYER     | FRDA_HUMAN  |             |      | Frataxin, mitochondrial;                          | -1.44                           | 0.16                  | 34.70                | -1.19 |
| TCIFLPLLRG | HSLFTCEPITVPR         | FZD6_HUMAN  |             |      | Frizzled-6;                                       | -4.24                           | 0.80                  | 43.90                | -2.89 |
| DESTGSIAKR | LQSIGTENTEENRR        | ALDOA_HUMAN |             |      | Fructose-bisphosphate aldolase A;                 | 5.05                            | 0.69                  | 32.30                | -2.80 |
| DESTGSIAKR | LQSIGTENTEENR         | ALDOA_HUMAN |             |      | Fructose-bisphosphate                             | 3.89                            | 0.42                  | 51.90                | -0.99 |
| DFAKWRCVLK | IGEHTPSALAIMENANVLAR  | ALDOA_HUMAN |             |      | Fructose-bisphosphate aldolase A;                 | 2.90                            | 0.08                  | 60.00                | -0.94 |
| ADESTGSIK  | RLQSIGTENTEENR        | ALDOA_HUMAN |             |      | Fructose-bisphosphate aldolase A;                 | -0.29                           | 0.03                  | 40.60                | -1.60 |
| KGVVPLAGTD | GETTTQGLDGLSER        | ALDOA_HUMAN | ALDOC_HUMAN |      | Fructose-bisphosphate                             | -0.39                           | 0.04                  | 75.80                | -1.33 |
| VVPLAGTDGE | TTTQGLDGLSER          | ALDOA_HUMAN | ALDOC_HUMAN |      | Fructose-bisphosphate                             | -2.55                           | 0.15                  | 29.70                | -3.43 |
| VVGKVDKGV  | VPLAGTNGETTTQGLDGLSER | ALDOA_HUMAN |             |      | Fructose-bisphosphate aldolase A;                 | -5.27                           | 0.00                  | 64.50                | -1.35 |
| DESVGMAKR  | LSQIGVENTEENRR        | ALDOC_HUMAN |             |      | Fructose-bisphosphate aldolase C;                 | 1.47                            | 0.07                  | 31.30                | -0.36 |
| WRCVLKISER | TPSALAIENANVLAR       | ALDOC_HUMAN |             |      | Fructose-bisphosphate aldolase C;                 | 1.32                            | 0.17                  | 41.90                | -3.51 |
| IKVDKGVVPL | AGTDGETTTQGLDGLSER    | ALDOC_HUMAN |             |      | Fructose-bisphosphate aldolase C;                 | -0.42                           | 0.02                  | 80.40                | -1.36 |
| GIKVDKGVVP | LAGTDGETTTQGLDGLSER   | ALDOC_HUMAN |             |      | Fructose-bisphosphate                             | -1.55                           | 0.09                  | 48.10                | -1.23 |
| QTLKPSGFHE | DDPFFYDEHTLR          | FXYD5_HUMAN |             |      | FXYD domain-containing ion transport regulator 5; | 4.54                            | 0.39                  | 33.20                | -2.78 |
| LCALLAPGGA | YVLDDSDGLGR           | GALC_HUMAN  |             |      | Galactocerebrosidase;                             | 0.08                            | 0.00                  | 40.10                | -1.29 |
| HLKEAGALDR | LLDLPAASSEDIER        | GALA_HUMAN  |             |      | Galanin peptides;                                 | 1.78                            | 0.14                  | 67.60                | -2.97 |
| LHLKEAGALD | RLLDLPAASSEDIER       | GALA_HUMAN  |             |      | Galanin peptides;                                 | 1.55                            | 0.17                  | 62.60                | 0.11  |
| KEAGALDRLL | DLPAASSEDIER          | GALA_HUMAN  |             |      | Galanin peptides;                                 | 1.02                            | 0.05                  | 58.40                | -2.08 |

Table S5

| Non-prime  | Prime                   | Id 1        | Id 2 | Id 3 | Protein (Id1)               | Fold-change (log <sub>2</sub> ) | Fc standard deviation | X! Tandem hyperscore | ppm   |
|------------|-------------------------|-------------|------|------|-----------------------------|---------------------------------|-----------------------|----------------------|-------|
| AKSFVLNLGK | DSNNLCLHFNPR            | LEG1_HUMAN  |      |      | Galectin-1;                 | 3.46                            | 0.32                  | 32.20                | -1.19 |
| TQGVNDGDMR | LADGGATNQGR             | LG3BP_HUMAN |      |      | Galectin-3-binding protein; | 8.81                            | 1.36                  | 41.50                | -1.29 |
| AGVVCTNETR | STHTLDLSR               | LG3BP_HUMAN |      |      | Galectin-3-binding protein; | 3.49                            | 0.14                  | 38.60                | -1.04 |
| PSALDTNSSK | STSSFPCPAGHFNGFR        | LG3BP_HUMAN |      |      | Galectin-3-binding protein; | 3.30                            | 0.19                  | 48.40                | -1.56 |
| YLPTIQSCWN | YGFSCSSDELPLVGLTKSGGSDR | LG3BP_HUMAN |      |      | Galectin-3-binding          | 2.88                            | 0.19                  | 35.60                | 2.37  |
| AVPSELALLK | AVDTWSWGER              | LG3BP_HUMAN |      |      | Galectin-3-binding          | 2.49                            | 0.07                  | 27.90                | -6.47 |
| STHTLDLSRE | LSEALGQIFDSQR           | LG3BP_HUMAN |      |      | Galectin-3-binding protein; | 2.00                            | 0.14                  | 55.10                | -2.14 |
| RSTHTLDLSR | ELSEALGQIFDSQR          | LG3BP_HUMAN |      |      | Galectin-3-binding protein; | 1.46                            | 0.06                  | 67.90                | -6.54 |
| PRIYTSPTWS | AFVTDSSWSAR             | LG3BP_HUMAN |      |      | Galectin-3-binding protein; | 0.67                            | 0.02                  | 26.90                | -4.20 |
| LVYQSRRGPL | VKYSSDYFQAPSDYR         | LG3BP_HUMAN |      |      | Galectin-3-binding protein; | 0.62                            | 0.06                  | 40.20                | -1.00 |
| WGERASHEEV | EGLVEKIR                | LG3BP_HUMAN |      |      | Galectin-3-binding          | 0.56                            | 0.05                  | 30.00                | -2.07 |
| YQSRRGPLVK | YSSDYFQAPSDYR           | LG3BP_HUMAN |      |      | Galectin-3-binding protein; | 0.56                            | 0.03                  | 55.70                | -0.80 |
| QSCWNYGFSC | SSDELPLVGLTKSGGSDR      | LG3BP_HUMAN |      |      | Galectin-3-binding          | 0.44                            | 0.01                  | 31.20                | 0.69  |
| TWSWGERASH | EEVEGLVEKIR             | LG3BP_HUMAN |      |      | Galectin-3-binding          | 0.41                            | 0.04                  | 35.20                | -1.17 |
| KSQLVYQSRR | GPLVKYSSDYFQAPSDYR      | LG3BP_HUMAN |      |      | Galectin-3-binding protein; | 0.40                            | 0.01                  | 45.10                | -1.16 |
| SRRGPLVKYS | SDYFQAPSDYR             | LG3BP_HUMAN |      |      | Galectin-3-binding protein; | 0.38                            | 0.02                  | 45.20                | -2.53 |
| VYQSRRGPLV | KYSSDYFQAPSDYR          | LG3BP_HUMAN |      |      | Galectin-3-binding          | 0.31                            | 0.01                  | 44.20                | -1.96 |
| QKKTLQALEF | HTVPPQLLAR              | LG3BP_HUMAN |      |      | Galectin-3-binding          | 0.29                            | 0.02                  | 39.80                | -0.83 |
| QAEAWPSVPT | DLLQLLLPR               | LG3BP_HUMAN |      |      | Galectin-3-binding protein; | 0.18                            | 0.02                  | 44.40                | -3.05 |
| KPRIYTSPTW | SAFVTDSSWSAR            | LG3BP_HUMAN |      |      | Galectin-3-binding protein; | 0.13                            | 0.01                  | 42.50                | 1.78  |
| TQAEAWPSVP | TDLLQLLLPR              | LG3BP_HUMAN |      |      | Galectin-3-binding          | 0.02                            | 0.00                  | 44.00                | -3.06 |

Table S5

| Non-prime   | Prime                 | Id 1        | Id 2       | Id 3       | Protein (Id1)               | Fold-change (log <sub>2</sub> ) | Fc standard deviation | X! Tandem hyperscore | ppm   |
|-------------|-----------------------|-------------|------------|------------|-----------------------------|---------------------------------|-----------------------|----------------------|-------|
| YKPRIYTSPT  | WSAFVTDSSWSAR         | LG3BP_HUMAN |            |            | Galectin-3-binding protein; | -0.04                           | 0.00                  | 42.80                | -1.11 |
| TYKPRIYTSP  | TWSAFVTDSSWSAR        | LG3BP_HUMAN |            |            | Galectin-3-binding protein; | -0.08                           | 0.01                  | 59.60                | -1.90 |
| EALFQKKTLLQ | ALEFHTVPFQLLAR        | LG3BP_HUMAN |            |            | Galectin-3-binding protein; | -0.12                           | 0.00                  | 26.00                | -2.32 |
| RGPLVKYSSD  | YFQAPSDYR             | LG3BP_HUMAN |            |            | Galectin-3-binding protein; | -0.12                           | 0.01                  | 27.40                | 0.25  |
| AEAWPSVPTD  | LLQLLLPR              | LG3BP_HUMAN |            |            | Galectin-3-binding protein; | -0.14                           | 0.01                  | 23.50                | -3.20 |
| LFQKKTLLQAL | EFHTVPFQLLAR          | LG3BP_HUMAN |            |            | Galectin-3-binding protein; | -0.18                           | 0.00                  | 38.10                | -3.21 |
| ALTQAEAWPS  | VPTDLLQLLLPR          | LG3BP_HUMAN |            |            | Galectin-3-binding protein; | -0.34                           | 0.04                  | 36.70                | -2.41 |
| GPLVKYSSDY  | FQAPSDYR              | LG3BP_HUMAN |            |            | Galectin-3-binding protein; | -0.37                           | 0.02                  | 23.60                | -5.30 |
| HTLDLSRELS  | EALGQIFDSQR           | LG3BP_HUMAN |            |            | Galectin-3-binding protein; | -0.49                           | 0.04                  | 43.70                | -2.09 |
| ALFQKKTLLQA | LEFHTVPFQLLAR         | LG3BP_HUMAN |            |            | Galectin-3-binding protein; | -0.52                           | 0.01                  | 35.50                | -2.68 |
| THTLDLSREL  | SEALGQIFDSQR          | LG3BP_HUMAN |            |            | Galectin-3-binding protein; | -0.66                           | 0.03                  | 55.20                | -2.03 |
| QWGTVCNDLW  | DLTDASVVCR            | LG3BP_HUMAN |            |            | Galectin-3-binding protein; | -0.76                           | 0.06                  | 59.30                | -1.88 |
| TRSTHTLDLS  | RELSEALGQIFDSQR       | LG3BP_HUMAN |            |            | Galectin-3-binding protein; | -0.76                           | 0.03                  | 42.40                | -2.80 |
| TLDLSRELSE  | ALGQIFDSQR            | LG3BP_HUMAN |            |            | Galectin-3-binding protein; | -0.96                           | 0.02                  | 34.00                | 1.62  |
| GAYPATGPYG  | APAGPLIVPYNLPLPGGVVPR | LEG3_HUMAN  |            |            | Galectin-3;                 | 1.11                            | 0.16                  | 76.10                | -0.33 |
| ANRIALDFQR  | GNDVAFHFNPR           | LEG3_HUMAN  |            |            | Galectin-3;                 | 0.73                            | 0.04                  | 32.90                | -0.92 |
| QNGSSMKPRA  | DVAFHFNPR             | LEG3_HUMAN  | LEG4_HUMAN | LEG8_HUMAN | Galectin-3;                 | -0.20                           | 0.02                  | 25.90                | -1.59 |
| HLKKPSQLSS  | FSWDNCDEGKDPVIR       | SAP3_HUMAN  |            |            | Ganglioside GM2 activator;  | 0.29                            | 0.02                  | 36.60                | -1.88 |

Table S5

| Non-prime  | Prime                   | Id 1        | Id 2 | Id 3 | Protein (Id1)                                 | Fold-change (log <sub>2</sub> ) | Fc standard deviation | X! Tandem hyperscore | ppm   |
|------------|-------------------------|-------------|------|------|-----------------------------------------------|---------------------------------|-----------------------|----------------------|-------|
| AHLKKPSQLS | SFSWDNCDEGKDPAVIR       | SAP3_HUMAN  |      |      | Ganglioside GM2 activator;                    | -0.10                           | 0.01                  | 30.70                | -7.25 |
| GEDWVSVSSK | DADLTDTAQTR             | FCL_HUMAN   |      |      | GDP-L-fucose synthase;                        | 1.83                            | 0.12                  | 51.10                | -4.05 |
| KKGGVASGFK | HVVPNEVVVQR             | GELS_HUMAN  |      |      | Gelsolin;                                     | 0.73                            | 0.08                  | 37.90                | -2.52 |
| AASAILTAQL | DEELGGTPVQSR            | GELS_HUMAN  |      |      | Gelsolin;                                     | 0.47                            | 0.04                  | 41.00                | -2.35 |
| KNWRDPDQTD | GLGLSYLSSHIANVER        | GELS_HUMAN  |      |      | Gelsolin;                                     | -0.02                           | 0.00                  | 31.60                | 0.17  |
| DQTDGLGLSY | LSSHIANVER              | GELS_HUMAN  |      |      | Gelsolin;                                     | -0.10                           | 0.00                  | 28.40                | -1.98 |
| ETLIKKRKAR | SLLPLSTSLDHR            | GEMI5_HUMAN |      |      | Gem-associated protein 5;                     | 0.73                            | 0.01                  | 40.50                | -1.53 |
| LSVEPSQQLD | TASTEETDPETSQPEPNRPELDR | GEMI5_HUMAN |      |      | Gem-associated protein 5;                     | -0.73                           | 0.06                  | 52.80                | -2.89 |
| ISRGVQVLPR | DTASLSTTPSESPR          | GEPH_HUMAN  |      |      | Gephyrin;                                     | 2.27                            | 0.21                  | 40.10                | -1.35 |
| AELTKVFEIR | NTEDLTEEWLR             | GMFB_HUMAN  |      |      | Glia maturation factor beta;                  | 7.12                            | 1.51                  | 45.60                | -4.25 |
| LQSLTCDLES | LRGTNESLER              | GFAP_HUMAN  |      |      | Glial fibrillary acidic                       | -0.08                           | 0.01                  | 35.30                | -9.47 |
| IHQGTKMIPC | DFLIPVQTQHPIR           | G6PI_HUMAN  |      |      | Glucose-6-phosphate isomerase;                | -0.42                           | 0.02                  | 37.00                | -4.56 |
| NFFRMVISNP | AATQSDIDFLIEEIER        | DCE1_HUMAN  |      |      | Glutamate decarboxylase 1;                    | -6.27                           | 0.00                  | 37.10                | 0.05  |
| PIRTFQDSLK | QVEMSYGTVR              | GRID1_HUMAN |      |      | Glutamate receptor delta-                     | -6.27                           | 0.00                  | 25.10                | -4.57 |
|            | M GLLSQGSPLSWEETKR      | GSH1_HUMAN  |      |      | Glutamate--cysteine ligase catalytic subunit; | 0.68                            | 0.04                  | 36.40                | -0.32 |
| MSGESAR    | SLGKGSAPPGPVPEGSIR      | GSTO1_HUMAN |      |      | Glutathione S-transferase omega-1;            | 2.89                            | 0.16                  | 24.50                | -1.87 |
|            | MPP YTVVYFPVR           | GSTP1_HUMAN |      |      | Glutathione S-transferase P;                  | 0.79                            | 0.06                  | 35.80                | -2.30 |
| LGRTLGLYGK | DQQEAAALVDMVNDGVEDLR    | GSTP1_HUMAN |      |      | Glutathione S-transferase P;                  | 0.00                            | 0.00                  | 72.30                | -3.76 |

Table S5

| Non-prime  | Prime                | Id 1        | Id 2       | Id 3 | Protein (Id1)                                              | Fold-change (log <sub>2</sub> ) | Fc standard deviation | X! Tandem hyperscore | ppm   |
|------------|----------------------|-------------|------------|------|------------------------------------------------------------|---------------------------------|-----------------------|----------------------|-------|
| MAFRVPTANV | SVVDLTCR             | G3PT_HUMAN  | G3P_HUMAN  |      | Glyceraldehyde-3-phosphate dehydrogenase, testis-specific; | -0.16                           | 0.01                  | 30.60                | -3.68 |
| NGKLTGMAFR | VPTANVSVVDLTCR       | G3P_HUMAN   |            |      | Glyceraldehyde-3-phosphate dehydrogenase;                  | 4.36                            | 0.52                  | 60.30                | 1.67  |
| YDNEFGYSNR | VVDLMAHMASK          | G3P_HUMAN   |            |      | Glyceraldehyde-3-phosphate dehydrogenase;                  | 2.82                            | 0.21                  | 32.20                | -1.94 |
| NDHFVKLISW | YDNEFGYSNR           | G3P_HUMAN   |            |      | Glyceraldehyde-3-phosphate dehydrogenase;                  | 0.26                            | 0.02                  | 39.70                | -3.39 |
| PELNGKLTGM | AFRVPTANVSVVDLTCR    | G3P_HUMAN   |            |      | Glyceraldehyde-3-phosphate dehydrogenase;                  | 0.00                            | 0.00                  | 52.50                | -4.33 |
| LNGKLTGMAF | RVPTANVSVVDLTCR      | G3P_HUMAN   |            |      | Glyceraldehyde-3-phosphate dehydrogenase;                  | -0.06                           | 0.01                  | 55.10                | -0.58 |
| GMAFRVPTAN | VSVVDLTCR            | G3P_HUMAN   | G3PT_HUMAN |      | Glyceraldehyde-3-phosphate dehydrogenase;                  | -0.39                           | 0.01                  | 28.70                | -3.23 |
| LTGMAFRVPT | ANVSVVDLTCR          | G3P_HUMAN   |            |      | Glyceraldehyde-3-phosphate dehydrogenase;                  | -0.49                           | 0.06                  | 52.70                | -2.77 |
| KLTGMAFRVP | TANVSVVDLTCR         | G3P_HUMAN   |            |      | Glyceraldehyde-3-phosphate dehydrogenase;                  | -0.96                           | 0.08                  | 63.50                | -3.30 |
| SEKRKQISVR | GLAGLGDVAEVR         | PYGB_HUMAN  |            |      | Glycogen phosphorylase,                                    | 1.22                            | 0.10                  | 55.50                | -3.86 |
| RATRAFVAAR | SFVQGLGVASDVVR       | GPC1_HUMAN  |            |      | Glypican-1;                                                | 3.01                            | 0.25                  | 59.80                | -3.14 |
| IYGAKGFSL  | DVPQAEISGEHLR        | GPC1_HUMAN  |            |      | Glypican-1;                                                | 1.11                            | 0.07                  | 26.70                | -3.58 |
| MALSTASDDR | CWNGMAR              | GPC1_HUMAN  |            |      | Glypican-1;                                                | 1.06                            | 0.04                  | 29.60                | -6.06 |
| KPLPAGRISR | SISESAFSAR           | GPC4_HUMAN  |            |      | Glypican-4;                                                | -3.08                           | 0.00                  | 34.20                | -4.04 |
| RDLSENNDR  | QQLQALSEPQPR         | GOLM1_HUMAN |            |      | Golgi membrane protein 1;                                  | 4.12                            | 0.44                  | 40.80                | 2.67  |
| DVFNVEDQKR | DTINLLDQR            | GOLM1_HUMAN |            |      | Golgi membrane protein                                     | 3.70                            | 0.22                  | 38.20                | -1.25 |
| ENPEMEGPER | DQLVIPDGQEEEQEAAGEGR | GOLM1_HUMAN |            |      | Golgi membrane protein                                     | 2.81                            | 0.26                  | 66.20                | -1.41 |
| RDRLPQEPGR | EQVVEDRPVGGGR        | GOLM1_HUMAN |            |      | Golgi membrane protein 1;                                  | 1.72                            | 0.05                  | 26.70                | -1.39 |

Table S5

| Non-prime  | Prime                   | Id 1        | Id 2 | Id 3 | Protein (Id1)                              | Fold-change (log <sub>2</sub> ) | Fc standard deviation | X! Tandem hyperscore | ppm   |
|------------|-------------------------|-------------|------|------|--------------------------------------------|---------------------------------|-----------------------|----------------------|-------|
| PEMEGPERDQ | LVIPDGQEEEQEAAGEGR      | GOLM1_HUMAN |      |      | Golgi membrane protein 1;                  | -0.14                           | 0.01                  | 85.00                | -0.61 |
| QIKDFKEKIQ | QDADSVITVGR             | GCP60_HUMAN |      |      | Golgi resident protein                     | 4.44                            | 0.25                  | 25.10                | 0.42  |
| AGYTENVKAR | SCEKEVVSAQPATFLAR       | GRN_HUMAN   |      |      | Granulins;                                 | 2.05                            | 0.16                  | 51.20                | 0.51  |
| DNQTCCRDNR | QGWACCPYR               | GRN_HUMAN   |      |      | Granulins;                                 | 1.88                            | 0.11                  | 33.30                | -0.90 |
| KKLPAQRTNR | AVALSSSVMCPDAR          | GRN_HUMAN   |      |      | Granulins;                                 | 1.06                            | 0.08                  | 67.80                | -1.07 |
| RTNRAVALSS | SVMCPDAR                | GRN_HUMAN   |      |      | Granulins;                                 | 0.99                            | 0.03                  | 34.70                | -4.02 |
| NQTCCRDNRQ | GWACCPYR                | GRN_HUMAN   |      |      | Granulins;                                 | 0.66                            | 0.03                  | 34.10                | 0.27  |
| LTKLPAHTVG | DVKCDMEVSCPDGYTCCR      | GRN_HUMAN   |      |      | Granulins;                                 | 0.47                            | 0.05                  | 63.90                | -0.22 |
| PAQRTNRAVA | LSSSVMCPDAR             | GRN_HUMAN   |      |      | Granulins;                                 | 0.23                            | 0.01                  | 33.40                | -3.42 |
| QRTNRAVALS | SSVMCPDAR               | GRN_HUMAN   |      |      | Granulins;                                 | 0.09                            | 0.01                  | 33.90                | 0.86  |
| LVAAGRRAAG | ASVATELR                | GROA_HUMAN  |      |      | Growth-regulated alpha                     | 1.91                            | 0.06                  | 26.70                | -2.16 |
| ALELRPRGEA | AEGPAAAAAAAAAAAAAGVGGEI | GDF11_HUMAN |      |      | Growth/differentiation factor 11;          | 0.20                            | 0.01                  | 53.60                | -3.23 |
| VLENTKRSRR | NLGLDCDEHSSES           | GDF11_HUMAN |      |      | Growth/differentiation factor 11;          | -0.02                           | 0.00                  | 31.00                | -1.81 |
| GGHLHLRISR | AALPEGLPEASR            | GDF15_HUMAN |      |      | Growth/differentiation factor 15;          | 2.04                            | 0.18                  | 42.90                | -5.38 |
| VLSWLPHGGA | LSLAEASR                | GDF15_HUMAN |      |      | Growth/differentiation factor 15;          | 0.57                            | 0.02                  | 25.50                | 0.11  |
| GALSLAEASR | ASFPGPSELHSEDSR         | GDF15_HUMAN |      |      | Growth/differentiation factor 15;          | -0.39                           | 0.02                  | 39.00                | -3.71 |
| ALSLAEASRA | SFPGPSELHSEDSR          | GDF15_HUMAN |      |      | Growth/differentiation                     | -1.04                           | 0.04                  | 27.70                | -1.20 |
| ETTSEAWSVE | VLPSDSEAPDLKQEER        | GAPD1_HUMAN |      |      | GTPase-activating protein and VPS9 domain- | 1.35                            | 0.12                  | 30.40                | -2.89 |
| TACYFATIHT | DSSLLLADITDKFGQR        | GUAD_HUMAN  |      |      | Guanine deaminase;                         | -0.89                           | 0.12                  | 45.00                | 0.38  |

Table S5

| Non-prime  | Prime            | Id 1        | Id 2        | Id 3        | Protein (Id1)                                                                 | Fold-change (log <sub>2</sub> )   | Fc standard deviation | X! Tandem hyperscore | ppm   |       |
|------------|------------------|-------------|-------------|-------------|-------------------------------------------------------------------------------|-----------------------------------|-----------------------|----------------------|-------|-------|
| NKTVMAHGCV | LSAEELNVFHER     | GUAD_HUMAN  |             |             | Guanine deaminase;                                                            | -0.89                             | 0.05                  | 53.40                | -0.41 |       |
| TNKTVMAHGC | YLSAEELNVFHER    | GUAD_HUMAN  |             |             | Guanine deaminase;                                                            | -0.93                             | 0.05                  | 55.80                | -2.43 |       |
| LQAEVTALKT | LVITSTPASPNR     | R3GEF_HUMAN |             |             | Guanine nucleotide exchange factor for Rab-Guanine nucleotide-binding protein | -0.69                             | 0.06                  | 30.90                | -3.56 |       |
| TREGNVRVSR | ELAGHTGYLSCCR    | GBB1_HUMAN  |             |             | G(I)/G(S)/G(T) subunit                                                        | 0.13                              | 0.01                  | 43.40                | -3.99 |       |
| TREGNVRVSR | ELPGHTGYLSCCR    | GBB2_HUMAN  | GBB4_HUMAN  |             | Guanine nucleotide-                                                           | 0.11                              | 0.01                  | 38.60                | -1.77 |       |
| MTKIKADPD  | GPEAQAEACSGER    | NHP2_HUMAN  |             |             | H/ACA ribonucleoprotein                                                       | -0.08                             | 0.00                  | 72.10                | -1.29 |       |
|            | MFLQYYLNEQGDR    | NOP10_HUMAN |             |             | H/ACA ribonucleoprotein complex subunit 3;                                    | 0.21                              | 0.01                  | 67.90                | 2.64  |       |
| EGEEEQAINR | QTALYTLK         | HEAT1_HUMAN |             |             | HEAT repeat-containing protein 1;                                             | 3.64                              | 0.26                  | 23.20                | 4.32  |       |
| VPAYFNDSQR | QATKDAGVIAGLNVL  | HS71L_HUMAN | HSP71_HUMAN |             | Heat shock 70 kDa                                                             | 4.84                              | 0.37                  | 31.90                | -0.06 |       |
|            | QASIEIDSLY       | EGIDFYTSITR | HS71L_HUMAN | HSP71_HUMAN | HSP7C_HUMAN                                                                   | Heat shock 70 kDa protein 1-like; | -0.29                 | 0.02                 | 30.60 | -1.42 |
| TVTNAVVTVP | AYFNDSQR         | HS71L_HUMAN | GRP75_HUMAN | HSP71_HUMAN | Heat shock 70 kDa protein 1-like;                                             | -1.55                             | 0.05                  | 33.20                | -3.19 |       |
| TFTTYSNQP  | GVLIQVYEGER      | HS71L_HUMAN | HSP71_HUMAN | HSP7C_HUMAN | Heat shock 70 kDa protein 1-like;                                             | -2.25                             | 0.11                  | 30.50                | -4.01 |       |
| GVDFYKSITR | ARFEELCSDLFR     | HSP71_HUMAN | HSP76_HUMAN | HSP77_HUMAN | Heat shock 70 kDa                                                             | 3.30                              | 0.14                  | 33.50                | -1.14 |       |
| FNDSQRQATK | DAGVIAGLNVL      | HSP71_HUMAN | HS71L_HUMAN |             | Heat shock 70 kDa                                                             | 1.45                              | 0.13                  | 55.00                | -3.42 |       |
| SIDAGVFEVK | ATAGDTHLGGEDFDNR | HSP71_HUMAN | HS71L_HUMAN | HSP76_HUMAN | Heat shock 70 kDa protein 1A/1B;                                              | 1.24                              | 0.08                  | 54.00                | -2.05 |       |
| KALRDAKLDK | AQIHDLVLVGGSTR   | HSP71_HUMAN |             |             | Heat shock 70 kDa                                                             | 0.42                              | 0.03                  | 36.90                | -2.41 |       |
| FNDSQRQATK | DAGAIAGLNVL      | HSP76_HUMAN |             |             | Heat shock 70 kDa protein 6;                                                  | 7.20                              | 1.34                  | 47.30                | -0.25 |       |
| EIIANDQGNR | TTPSYVAFTDTER    | HSP76_HUMAN | HS71L_HUMAN | HSP71_HUMAN | Heat shock 70 kDa protein 6;                                                  | 6.43                              | 0.42                  | 53.70                | -1.85 |       |
| VPAYFNDSQR | QATKDAGAIAGLNVL  | HSP76_HUMAN |             |             | Heat shock 70 kDa                                                             | 2.96                              | 0.43                  | 36.60                | -0.42 |       |
| SCVGVFQQGR | VEILANDQGNR      | HSP76_HUMAN | HSP77_HUMAN |             | Heat shock 70 kDa protein 6;                                                  | 2.37                              | 0.16                  | 47.80                | -2.31 |       |



Table S5

| Non-prime  | Prime              | Id 1        | Id 2        | Id 3        | Protein (Id1)                      | Fold-change (log <sub>2</sub> ) | Fc standard deviation | X! Tandem hyperscore | ppm   |
|------------|--------------------|-------------|-------------|-------------|------------------------------------|---------------------------------|-----------------------|----------------------|-------|
| GAIAGLNVLR | IINEPTAAAIAYGLDR   | HSP76_HUMAN | HSP71_HUMAN |             | Heat shock 70 kDa protein 6;       | 2.36                            | 0.20                  | 76.50                | -1.22 |
| SCVGVFQHGK | VEIHANDQGNR        | HSP7C_HUMAN | GRP78_HUMAN | HS71L_HUMAN | Heat shock cognate 71 kDa protein; | 4.47                            | 0.32                  | 39.90                | -2.15 |
| KEIAEAYLGK | TVTNAVVTVPAYFNDSQR | HSP7C_HUMAN |             |             | Heat shock cognate 71 kDa protein; | 2.94                            | 0.13                  | 37.90                | -3.18 |
| VPAYFNDSQR | QATKDAGTIAGLNVLR   | HSP7C_HUMAN |             |             | Heat shock cognate 71 kDa protein; | 2.55                            | 0.21                  | 53.30                | -2.73 |
| GIDFYTSITR | ARFEELNADLFR       | HSP7C_HUMAN | HSP72_HUMAN |             | Heat shock cognate 71 kDa protein; | 1.91                            | 0.09                  | 48.10                | -2.25 |
| NDSQRQATKD | AGTIAGLNVLR        | HSP7C_HUMAN |             |             | Heat shock cognate 71 kDa protein; | 1.80                            | 0.17                  | 42.30                | -3.39 |
| FEELNADLFR | GTLDPVEKALR        | HSP7C_HUMAN |             |             | Heat shock cognate 71 kDa protein; | 1.07                            | 0.06                  | 34.00                | -2.76 |
| TIEDGIFEVK | STAGDTHLGGEDFDNR   | HSP7C_HUMAN | HSP72_HUMAN |             | Heat shock cognate 71 kDa protein; | 0.73                            | 0.05                  | 55.40                | -1.97 |
| KALRDAKLDK | SQIHDIIVLVGGSTR    | HSP7C_HUMAN |             |             | Heat shock cognate 71 kDa protein; | 0.71                            | 0.07                  | 48.60                | -4.03 |
| IGDAAKNQVA | MNPTNTVFDKR        | HSP7C_HUMAN |             |             | Heat shock cognate 71 kDa protein; | 0.60                            | 0.02                  | 24.40                | -2.82 |
| DFYTSITRAR | FEELNADLFR         | HSP7C_HUMAN | HSP72_HUMAN |             | Heat shock cognate 71 kDa protein; | 0.47                            | 0.02                  | 39.80                | -0.08 |
| IDFYTSITRA | RFEELNADLFR        | HSP7C_HUMAN | HSP72_HUMAN |             | Heat shock cognate 71 kDa protein; | 0.18                            | 0.01                  | 39.30                | -1.25 |
| FNDSQRQATK | DAGTIAGLNVLR       | HSP7C_HUMAN |             |             | Heat shock cognate 71 kDa protein; | -0.08                           | 0.01                  | 63.60                | -0.97 |
| RNAKLDKSQI | HDIIVLVGGSTR       | HSP7C_HUMAN | HS71L_HUMAN |             | Heat shock cognate 71 kDa protein; | -0.49                           | 0.03                  | 36.20                | 1.44  |
| FYTSITRARF | EELNADLFR          | HSP7C_HUMAN | HSP72_HUMAN |             | Heat shock cognate 71 kDa protein; | -0.52                           | 0.05                  | 37.10                | -3.07 |
| YTSITRARFE | ELNADLFR           | HSP7C_HUMAN | HSP72_HUMAN |             | Heat shock cognate 71 kDa protein; | -0.79                           | 0.05                  | 34.20                | -1.09 |

Table S5

| Non-prime  | Prime             | Id 1        | Id 2        | Id 3        | Protein (Id1)                      | Fold-change (log <sub>2</sub> ) | Fc standard deviation | X! Tandem hyperscore | ppm   |
|------------|-------------------|-------------|-------------|-------------|------------------------------------|---------------------------------|-----------------------|----------------------|-------|
| IEIDSLYEGI | DFYTSITR          | HSP7C_HUMAN | HS71L_HUMAN | HSP71_HUMAN | Heat shock cognate 71 kDa protein; | -0.82                           | 0.03                  | 24.80                | -0.48 |
| IEDGIFEVKS | TAGDTHLGGEDFDNR   | HSP7C_HUMAN | HS71L_HUMAN | HSP71_HUMAN | Heat shock cognate 71 kDa protein; | -1.08                           | 0.09                  | 38.40                | -1.40 |
| EDGIFEVKST | AGDTHLGGEDFDNR    | HSP7C_HUMAN | HS71L_HUMAN | HSP71_HUMAN | Heat shock cognate 71 kDa protein; | -1.25                           | 0.15                  | 51.30                | -4.48 |
| DSQRQATKDA | GTIAGLNVLR        | HSP7C_HUMAN |             |             | Heat shock cognate 71 kDa protein; | -1.66                           | 0.11                  | 40.40                | -3.81 |
| KEQITKFFLK | DISTTLNADEAVAR    | HS105_HUMAN | HS74L_HUMAN |             | Heat shock protein 105             | -0.47                           | 0.05                  | 59.70                | 3.64  |
| SQSCYIAVAR | AGGIETIANEFSDR    | HS105_HUMAN |             |             | Heat shock protein 105             | -0.93                           | 0.05                  | 47.40                | -4.71 |
| IMQDKLEKER | NDAKNAVEEYVYEFR   | HS105_HUMAN |             |             | Heat shock protein 105             | -0.96                           | 0.04                  | 41.00                | 2.41  |
| VAAPAYSRAL | SRQLSSGVSEIR      | HSPB1_HUMAN |             |             | Heat shock protein beta-1;         | 1.10                            | 0.07                  | 48.90                | -4.08 |
| AAPAYSRAL  | RQLSSGVSEIR       | HSPB1_HUMAN |             |             | Heat shock protein beta-1;         | 0.47                            | 0.04                  | 43.20                | -1.74 |
| TLTVEAPMPK | LATQSNEITIPVTFESR | HSPB1_HUMAN |             |             | Heat shock protein beta-1;         | 0.08                            | 0.01                  | 51.10                | 5.63  |
| LIPEYLNfir | GVVDSIDLPLNISR    | HS90A_HUMAN | H90B3_HUMAN | HS90B_HUMAN | Heat shock protein HSP 90-alpha;   | 6.98                            | 0.48                  | 75.20                | -0.32 |
| FSVEGQLEFR | ALLFVPR           | HS90A_HUMAN |             |             | Heat shock protein HSP 90-alpha;   | 4.27                            | 0.34                  | 25.20                | 0.83  |
| FYSNKEIFLR | ELISNSSDALDKIR    | HS90A_HUMAN |             |             | Heat shock protein HSP 90-alpha;   | 3.50                            | 0.22                  | 25.60                | -2.41 |
| HIYYITGETK | DQVANSFAFVER      | HS90A_HUMAN |             |             | Heat shock protein HSP 90-alpha;   | 1.79                            | 0.10                  | 48.10                | -0.24 |
| ADDTSAAVTE | EMPPLEGDDDDTSR    | HS90A_HUMAN | HS904_HUMAN |             | Heat shock protein HSP 90-alpha;   | 1.62                            | 0.03                  | 40.80                | -0.13 |
| RRIKEIVKKH | SQFIGYPITLVEKER   | HS90A_HUMAN |             |             | Heat shock protein HSP 90-alpha;   | 0.72                            | 0.03                  | 25.80                | -1.55 |
| IGRGTKVILH | LKEDQTEYLEER      | HS90A_HUMAN | H90B3_HUMAN | H90B4_HUMAN | Heat shock protein HSP 90-alpha;   | 0.49                            | 0.06                  | 47.70                | -1.91 |
| RGTKVILHLK | EDQTEYLEERR       | HS90A_HUMAN | H90B3_HUMAN | HS90B_HUMAN | Heat shock protein HSP 90-alpha;   | 0.40                            | 0.04                  | 38.10                | -0.20 |
| EYLNfirGvv | DSEDIDLPLNISR     | HS90A_HUMAN | H90B3_HUMAN | HS90B_HUMAN | Heat shock protein HSP 90-alpha;   | 0.31                            | 0.02                  | 37.20                | 0.77  |
| WESSAGGSFT | VRTDTGPEMGR       | HS90A_HUMAN |             |             | Heat shock protein HSP 90-alpha;   | 0.29                            | 0.01                  | 30.60                | -0.16 |

Table S5

| Non-prime  | Prime                | Id 1        | Id 2        | Id 3        | Protein (Id1)                    | Fold-change (log <sub>2</sub> ) | Fc standard deviation | X! Tandem hyperscore | ppm   |
|------------|----------------------|-------------|-------------|-------------|----------------------------------|---------------------------------|-----------------------|----------------------|-------|
| KHNDDEQYAW | ESSAGGSFTVR          | HS90A_HUMAN | HS902_HUMAN | HS90B_HUMAN | Heat shock protein HSP 90-alpha; | 0.11                            | 0.01                  | 33.60                | -5.47 |
| VRRVFIMDNC | EELIPEYLNFR          | HS90A_HUMAN | HS904_HUMAN |             | Heat shock protein HSP 90-alpha; | 0.09                            | 0.01                  | 39.20                | -2.61 |
| RMKENQKHIY | YITGETKDQVANSFVER    | HS90A_HUMAN |             |             | Heat shock protein HSP 90-alpha; | 0.04                            | 0.00                  | 40.80                | -3.77 |
| KLYVRRVFIM | DNCEELIPEYLNFR       | HS90A_HUMAN | HS904_HUMAN |             | Heat shock protein HSP 90-alpha; | -0.02                           | 0.00                  | 32.20                | 1.58  |
| MGYMAAKKHL | EINPDHSIIETLR        | HS90A_HUMAN |             |             | Heat shock protein HSP 90-alpha; | -0.04                           | 0.00                  | 31.50                | -1.65 |
| GYMAAKKHLE | INPDHSIIETLR         | HS90A_HUMAN |             |             | Heat shock protein HSP 90-alpha; | -0.10                           | 0.01                  | 34.30                | -2.22 |
| GRGTKVILHL | KEDQTEYLEER          | HS90A_HUMAN | H90B3_HUMAN | H90B4_HUMAN | Heat shock protein HSP 90-alpha; | -0.12                           | 0.01                  | 37.30                | 0.13  |
| PEYLNFRIGV | VDSEDLPLNISR         | HS90A_HUMAN | H90B3_HUMAN | HS90B_HUMAN | Heat shock protein HSP 90-alpha; | -0.25                           | 0.02                  | 35.20                | -3.03 |
| TRMKENQKHI | YYITGETKDQVANSFVER   | HS90A_HUMAN |             |             | Heat shock protein HSP 90-alpha; | -0.27                           | 0.03                  | 37.40                | -1.06 |
| RGTKVILHLK | EDQTEYLEER           | HS90A_HUMAN | H90B3_HUMAN | H90B4_HUMAN | Heat shock protein HSP 90-alpha; | -0.29                           | 0.03                  | 47.20                | -1.72 |
| WEDHLAVKHF | SVEGQLEFR            | HS90A_HUMAN | H90B3_HUMAN | HS902_HUMAN | Heat shock protein HSP 90-alpha; | -0.42                           | 0.03                  | 37.30                | -3.27 |
| TMGYMAAKKH | LEINPDHSIIETLR       | HS90A_HUMAN |             |             | Heat shock protein HSP 90-alpha; | -0.52                           | 0.05                  | 33.20                | -2.85 |
| ELIPEYLNFI | RGVVDSIDLPLNISR      | HS90A_HUMAN | HS90B_HUMAN |             | Heat shock protein HSP 90-alpha; | -0.55                           | 0.05                  | 39.20                | -2.70 |
| IMDSCDELIP | EYLNFR               | HS90A_HUMAN | HS904_HUMAN | HS90B_HUMAN | Heat shock protein HSP 90-alpha; | -0.58                           | 0.03                  | 26.20                | -2.73 |
| ALLFVPRRAP | FDLFENR              | HS90A_HUMAN |             |             | Heat shock protein HSP 90-alpha; | -0.60                           | 0.05                  | 26.00                | -2.36 |
| LNFRIGVVDS | EDLPLNISR            | HS90A_HUMAN | H90B3_HUMAN | HS90B_HUMAN | Heat shock protein HSP 90-alpha; | -0.66                           | 0.05                  | 33.60                | -4.58 |
| SVKDLVILLY | ETALLSSGFSLEDPQTHANR | HS90A_HUMAN |             |             | Heat shock protein HSP 90-alpha; | -0.69                           | 0.06                  | 51.70                | -1.67 |
| LVILLYETAL | LSSGFSLEDPQTHANR     | HS90A_HUMAN |             |             | Heat shock protein HSP 90-alpha; | -0.73                           | 0.06                  | 40.40                | -0.61 |
| GTKVILHLKE | DQTEYLEER            | HS90A_HUMAN | H90B3_HUMAN | H90B4_HUMAN | Heat shock protein HSP 90-alpha; | -0.82                           | 0.07                  | 35.90                | -3.94 |

Table S5

| Non-prime   | Prime                 | Id 1        | Id 2        | Id 3        | Protein (Id1)                              | Fold-change (log <sub>2</sub> ) | Fc standard deviation | X! Tandem hyperscore | ppm   |
|-------------|-----------------------|-------------|-------------|-------------|--------------------------------------------|---------------------------------|-----------------------|----------------------|-------|
| ENQKHIYYIT  | GETKDQVANSFAVER       | HS90A_HUMAN |             |             | Heat shock protein HSP 90-alpha;           | -0.89                           | 0.08                  | 37.70                | -0.29 |
| ILLYETALLS  | SGFSLEDPQTHANR        | HS90A_HUMAN |             |             | Heat shock protein HSP 90-alpha;           | -1.00                           | 0.06                  | 23.50                | -3.89 |
| AAKKHLEINP  | DHSIETLR              | HS90A_HUMAN |             |             | Heat shock protein HSP 90-alpha;           | -1.16                           | 0.08                  | 24.20                | -2.77 |
| KDLVILLYET  | ALLSSGFSLEDPQTHANR    | HS90A_HUMAN |             |             | Heat shock protein HSP                     | -1.49                           | 0.08                  | 33.50                | -3.69 |
| FYSNKEIFLR  | ELISNASDALDKIR        | HS90B_HUMAN | ENPL_HUMAN  | H90B2_HUMAN | Heat shock protein HSP                     | 4.28                            | 0.31                  | 36.60                | -5.43 |
| KVEKVTISNR  | LVSSPCCIVTSTYGWTANMER | HS90B_HUMAN |             |             | Heat shock protein HSP 90-beta;            | 3.84                            | 0.19                  | 53.40                | -1.14 |
| DEVAEEPNA   | AVPDEIPPLEGDEDASR     | HS90B_HUMAN | H90B3_HUMAN |             | Heat shock protein HSP                     | 1.37                            | 0.08                  | 60.40                | 5.00  |
| GYMMAKKHLE  | INPDHPIVETLR          | HS90B_HUMAN |             |             | Heat shock protein HSP 90-beta;            | 0.88                            | 0.06                  | 31.70                | -7.25 |
| TMGYMMAKKH  | LEINPDHPIVETLR        | HS90B_HUMAN |             |             | Heat shock protein HSP 90-beta;            | 0.28                            | 0.01                  | 28.90                | -0.42 |
| NRRRLSELLR  | YHTSQSGDEMTSLSEYVSR   | HS90B_HUMAN |             |             | Heat shock protein HSP 90-beta;            | 0.08                            | 0.01                  | 60.10                | -2.26 |
| VRRVFIMDSC  | DELIPEYLNFR           | HS90B_HUMAN |             |             | Heat shock protein HSP 90-beta;            | -0.39                           | 0.06                  | 42.50                | -3.27 |
| AVKDLVLLF   | ETALLSSGFSLEDPQTHSNR  | HS90B_HUMAN |             |             | Heat shock protein HSP 90-beta;            | -1.44                           | 0.27                  | 35.70                | 0.27  |
| DGIFEVKSTA  | GDTHLGGEDFDNR         | HSP72_HUMAN | HS71L_HUMAN | HSP71_HUMAN | Heat shock-related 70 kDa protein 2;       | 0.26                            | 0.02                  | 40.10                | -1.16 |
| ASWAKSAGAK  | SSGGREDLESSGLQR       | HN1_HUMAN   |             |             | Hematological and                          | 1.90                            | 0.15                  | 28.80                | -1.43 |
| WAKSAGAKSS  | GGREDLESSGLQR         | HN1_HUMAN   |             |             | Hematological and neurological expressed 1 | 1.04                            | 0.04                  | 41.50                | -0.28 |
| LRQRASNKVVQ | DSAPVETPR             | HMOX1_HUMAN |             |             | Heme oxygenase 1;                          | -0.63                           | 0.02                  | 27.30                | -0.50 |
| KTNVKAAGWK  | VGAHAGEYGAEALER       | HBA_HUMAN   |             |             | Hemoglobin subunit alpha;                  | -0.69                           | 0.06                  | 58.60                | -3.20 |

Table S5

| Non-prime  | Prime                | Id 1        | Id 2        | Id 3 | Protein (Id1)                                                 | Fold-change (log <sub>2</sub> ) | Fc standard deviation | X! Tandem hyperscore | ppm   |
|------------|----------------------|-------------|-------------|------|---------------------------------------------------------------|---------------------------------|-----------------------|----------------------|-------|
| AVTALWGKVN | VDEVGGEALGR          | HBB_HUMAN   |             |      | Hemoglobin subunit beta;                                      | 0.00                            | 0.00                  | 36.00                | -1.06 |
| SQLSELHCDK | LHVDPENFR            | HBB_HUMAN   | HBD_HUMAN   |      | Hemoglobin subunit beta;                                      | -0.08                           | 0.01                  | 28.50                | -1.29 |
| VTALWGKVN  | DEVGGEALGR           | HBB_HUMAN   |             |      | Hemoglobin subunit beta;                                      | -0.16                           | 0.01                  | 44.60                | -6.69 |
| AMAFSAEQDL | QLCVGGCPPSQR         | RGMC_HUMAN  |             |      | Hemojuvelin;                                                  | 4.62                            | 0.71                  | 39.30                | -3.17 |
| ASSLYSSPVN | SSAPLAEDIDPELAR      | HGS_HUMAN   |             |      | Hepatocyte growth factor-regulated tyrosine kinase substrate; | 0.93                            | 0.04                  | 53.50                | 1.05  |
| SSAPPASSLY | SSPVNSSAPLAEDIDPELAR | HGS_HUMAN   |             |      | Hepatocyte growth factor-regulated tyrosine kinase            | 0.74                            | 0.04                  | 91.20                | -2.58 |
| SDDSKADSD  | GAKPEPVAMAR          | HDGR2_HUMAN |             |      | Hepatoma-derived growth factor-related protein 2;             | -0.20                           | 0.01                  | 33.90                | -1.59 |
| IQGHRVEVKK | AVPKEDIYSGGGGGSR     | ROA0_HUMAN  |             |      | Heterogeneous nuclear                                         | 1.13                            | 0.10                  | 43.80                | -1.02 |
| ESPKEPEQLR | KLFIGGLSFETTDESLR    | RA1L2_HUMAN | ROA1_HUMAN  |      | Heterogeneous nuclear ribonucleoprotein A1-like 2;            | -0.08                           | 0.00                  | 41.30                | 2.98  |
| GGGQYFAKPR | NQGGYGGSSSSSYGSGR    | ROA1_HUMAN  |             |      | Heterogeneous nuclear                                         | 2.18                            | 0.20                  | 74.90                | -1.33 |
| LRKLFIGGLS | FETTDESLR            | ROA1_HUMAN  | RA1L2_HUMAN |      | Heterogeneous nuclear ribonucleoprotein A1;                   | 0.94                            | 0.05                  | 26.90                | 0.79  |
| MSK        | SESPKEPEQLR          | ROA1_HUMAN  |             |      | Heterogeneous nuclear ribonucleoprotein A1;                   | 0.51                            | 0.01                  | 37.10                | -1.99 |
| VKKIFVGGIK | EDTEEYNLR            | ROA3_HUMAN  |             |      | Heterogeneous nuclear ribonucleoprotein A3;                   | 0.60                            | 0.05                  | 26.70                | -4.90 |
| KKDLTEYLSR | FGEVVDCTIKTDPVTGR    | HNRDL_HUMAN |             |      | Heterogeneous nuclear ribonucleoprotein D-like;               | 1.86                            | 0.09                  | 34.90                | -3.53 |
| GGLSWDTSKK | DLTEYLSR             | HNRDL_HUMAN |             |      | Heterogeneous nuclear ribonucleoprotein D-like;               | 0.32                            | 0.03                  | 30.10                | -0.20 |
| ESEGAIDAS  | KNEEDEGHSNSSPR       | HNRPD_HUMAN |             |      | Heterogeneous nuclear                                         | 3.57                            | 0.13                  | 29.50                | -3.41 |
| AMKTKEPVKK | IFVGGLSPDTPEEKIR     | HNRPD_HUMAN |             |      | Heterogeneous nuclear ribonucleoprotein D0;                   | 0.88                            | 0.08                  | 34.50                | -1.20 |
| HRTEMDWVLK | HSGPNSADSANDGFVR     | HNRPF_HUMAN |             |      | Heterogeneous nuclear ribonucleoprotein F;                    | 0.00                            | 0.00                  | 65.20                | 0.00  |

Table S5

| Non-prime  | Prime               | Id 1        | Id 2        | Id 3        | Protein (Id1)                               | Fold-change (log <sub>2</sub> ) | Fc standard deviation | X! Tandem hyperscore | ppm   |
|------------|---------------------|-------------|-------------|-------------|---------------------------------------------|---------------------------------|-----------------------|----------------------|-------|
| NFFSPLNPVR | VHIEIGPDGR          | HNRH1_HUMAN | HNRH2_HUMAN | HNRPF_HUMAN | Heterogeneous nuclear                       | 0.88                            | 0.06                  | 36.20                | 0.62  |
| GGEGFVVKVR | GLPWSCSADEVQR       | HNRH1_HUMAN |             |             | Heterogeneous nuclear ribonucleoprotein H;  | 0.71                            | 0.04                  | 52.10                | -3.19 |
| NSVEMDWVLK | HTGPNSPDTANDGFVR    | HNRH1_HUMAN | HNRH2_HUMAN |             | Heterogeneous nuclear ribonucleoprotein H;  | 0.11                            | 0.01                  | 73.30                | -1.69 |
| TEGEGFVVK  | VRGLPWSCSADEVQR     | HNRH1_HUMAN |             |             | Heterogeneous nuclear ribonucleoprotein H;  | -0.08                           | 0.01                  | 49.30                | -0.95 |
| GFDDYGGYNN | YGYGNDGFDDR         | HNRH3_HUMAN |             |             | Heterogeneous nuclear ribonucleoprotein H3; | 0.73                            | 0.04                  | 23.60                | 0.00  |
| FDDYGGYNNY | GYGNDGFDDR          | HNRH3_HUMAN |             |             | Heterogeneous nuclear                       | -0.06                           | 0.00                  | 33.20                | -3.67 |
| GGRPMPPSR  | DYDDMSPR            | HNRPK_HUMAN |             |             | Heterogeneous nuclear ribonucleoprotein K;  | 5.33                            | 0.44                  | 28.10                | -4.96 |
| EEEQAFKRSR | NTDEMVELR           | HNRPK_HUMAN |             |             | Heterogeneous nuclear                       | 4.63                            | 0.79                  | 36.40                | -3.08 |
| PSEWQMAYEP | QGGSGYDYSYAGGR      | HNRPK_HUMAN |             |             | Heterogeneous nuclear                       | 2.08                            | 0.13                  | 45.90                | -1.50 |
| DTWSPSEWQM | AYEPQGGSGYDYSYAGGR  | HNRPK_HUMAN |             |             | Heterogeneous nuclear ribonucleoprotein K;  | 0.82                            | 0.08                  | 93.80                | 0.05  |
| EWQMAYEPQG | GSGYDYSYAGGR        | HNRPK_HUMAN |             |             | Heterogeneous nuclear ribonucleoprotein K;  | 0.81                            | 0.05                  | 47.60                | -2.73 |
| TWSPSEWQMA | YEPQGGSGYDYSYAGGR   | HNRPK_HUMAN |             |             | Heterogeneous nuclear ribonucleoprotein K;  | 0.81                            | 0.08                  | 60.50                | -3.49 |
| DMEEEQAFKR | SRNTDEMVELR         | HNRPK_HUMAN |             |             | Heterogeneous nuclear ribonucleoprotein K;  | 0.51                            | 0.03                  | 36.70                | -3.54 |
| KGGKNIKALR | TDYNASVSPDSSGPER    | HNRPK_HUMAN |             |             | Heterogeneous nuclear ribonucleoprotein K;  | 0.42                            | 0.04                  | 71.00                | -3.65 |
| VECLNYQHVK | GSDFDCELR           | HNRPK_HUMAN |             |             | Heterogeneous nuclear ribonucleoprotein K;  | 0.38                            | 0.01                  | 33.20                | -3.62 |
| GGKNIKALRT | DYNASVSPDSSGPER     | HNRPK_HUMAN |             |             | Heterogeneous nuclear                       | -0.06                           | 0.01                  | 47.00                | -1.11 |
| VIGKGGKNIK | ALRTDYNASVSPDSSGPER | HNRPK_HUMAN |             |             | Heterogeneous nuclear ribonucleoprotein K;  | -0.23                           | 0.02                  | 39.60                | -2.74 |
| DRVVECIKII | LDLISESPIKGR        | HNRPK_HUMAN |             |             | Heterogeneous nuclear                       | -0.23                           | 0.01                  | 31.90                | -2.43 |
| RGGRGGSRAR | NLPLPPPPPR          | HNRPK_HUMAN |             |             | Heterogeneous nuclear                       | -1.00                           | 0.02                  | 39.10                | -3.41 |

Table S5

| Non-prime  | Prime                   | Id 1        | Id 2 | Id 3 | Protein (Id1)                                   | Fold-change (log <sub>2</sub> ) | Fc standard deviation | X! Tandem hyperscore | ppm   |
|------------|-------------------------|-------------|------|------|-------------------------------------------------|---------------------------------|-----------------------|----------------------|-------|
| EYESQAKRLK | TEEGEIDYSAEEGENRR       | HNRLI_HUMAN |      |      | Heterogeneous nuclear                           | 0.18                            | 0.02                  | 44.30                | -3.33 |
| EKNIKRGGNR | FEPYANPTKR              | HNRPM_HUMAN |      |      | Heterogeneous nuclear ribonucleoprotein M;      | 0.62                            | 0.02                  | 25.10                | -0.23 |
| MERGNFGGSF | AGSFGGAGGHAPGVAR        | HNRPM_HUMAN |      |      | Heterogeneous nuclear                           | 0.13                            | 0.01                  | 43.00                | -1.14 |
| ALKRGEIIAK | QGGGGGGGSVPGIER         | HNRPM_HUMAN |      |      | Heterogeneous nuclear                           | -0.20                           | 0.01                  | 47.70                | -6.39 |
| MRPFEGFQRK | AIVICPTDEDLKDR          | HNRLI_HUMAN |      |      | Heterogeneous nuclear                           | 0.49                            | 0.03                  | 34.90                | -4.35 |
| ELMERLQAAL | DDEEAGGRPAMEPGNGSLDLGGD | HNRPU_HUMAN |      |      | Heterogeneous nuclear                           | 1.31                            | 0.14                  | 68.50                | -1.05 |
| LKAELMERLQ | AALDDEEAGGRPAMEPGNGSLDL | HNRPU_HUMAN |      |      | Heterogeneous nuclear ribonucleoprotein U;      | 1.09                            | 0.12                  | 82.50                | -3.77 |
| GKSSGPTSLF | AVTVAPPGAR              | HNRPU_HUMAN |      |      | Heterogeneous nuclear ribonucleoprotein U;      | 0.80                            | 0.02                  | 28.10                | -2.05 |
| KFIEIAARKK | RNFILDQTNVSAQAQR        | HNRPU_HUMAN |      |      | Heterogeneous nuclear ribonucleoprotein U;      | -0.39                           | 0.04                  | 49.60                | 2.45  |
| RGAAKEAAGK | SSGPTSLFAVTVAPPGAR      | HNRPU_HUMAN |      |      | Heterogeneous nuclear ribonucleoprotein U;      | -0.52                           | 0.02                  | 43.70                | -4.93 |
| HHLRDYFEEY | GKIDTIEIITDR            | ROA2_HUMAN  |      |      | Heterogeneous nuclear ribonucleoproteins A2/B1; | 1.71                            | 0.09                  | 32.00                | -1.82 |
| EHHLRDYFEE | YGKIDTIEIITDR           | ROA2_HUMAN  |      |      | Heterogeneous nuclear                           | 1.02                            | 0.08                  | 48.00                | -1.43 |
| HLRDYFEEYG | KIDTIEIITDR             | ROA2_HUMAN  |      |      | Heterogeneous nuclear ribonucleoproteins A2/B1; | 0.91                            | 0.09                  | 27.50                | -1.44 |
| DYFEEYGKID | TIEIITDR                | ROA2_HUMAN  |      |      | Heterogeneous nuclear                           | 0.81                            | 0.07                  | 26.80                | -2.02 |
| RDYFEEYGKI | DTIEIITDR               | ROA2_HUMAN  |      |      | Heterogeneous nuclear ribonucleoproteins A2/B1; | 0.76                            | 0.05                  | 37.40                | -2.99 |
| LRDYFEEYGK | IDTIEIITDR              | ROA2_HUMAN  |      |      | Heterogeneous nuclear ribonucleoproteins A2/B1; | 0.41                            | 0.04                  | 39.00                | -2.55 |
| QEVQSSRSGR | GGNFGFGDSR              | ROA2_HUMAN  |      |      | Heterogeneous nuclear                           | 0.40                            | 0.01                  | 44.00                | -0.86 |
| FRKLFIGGLS | FETTEESLR               | ROA2_HUMAN  |      |      | Heterogeneous nuclear ribonucleoproteins A2/B1; | 0.34                            | 0.02                  | 26.60                | -2.54 |
| VDKIVLQKYH | TINGHNAEVR              | ROA2_HUMAN  |      |      | Heterogeneous nuclear ribonucleoproteins A2/B1; | -0.02                           | 0.00                  | 23.00                | 0.87  |
| MEK        | TLETVPLER               | ROA2_HUMAN  |      |      | Heterogeneous nuclear                           | -0.32                           | 0.03                  | 27.20                | -1.10 |

Table S5

| Non-prime  | Prime              | Id 1        | Id 2        | Id 3        | Protein (Id1)                                   | Fold-change (log <sub>2</sub> ) | Fc standard deviation | X! Tandem hyperscore | ppm   |
|------------|--------------------|-------------|-------------|-------------|-------------------------------------------------|---------------------------------|-----------------------|----------------------|-------|
| SPSPLSSSF  | DLDYDFQR           | HNRPC_HUMAN |             |             | Heterogeneous nuclear ribonucleoproteins C1/C2; | 0.96                            | 0.06                  | 37.10                | -4.34 |
| YYDRMYSYPA | RVPPPPPIAR         | HNRPC_HUMAN |             |             | Heterogeneous nuclear                           | 0.74                            | 0.05                  | 28.70                | -1.86 |
| FQRDYYDRMY | SYPARVPPPPPIAR     | HNRPC_HUMAN |             |             | Heterogeneous nuclear                           | 0.37                            | 0.03                  | 38.50                | -1.03 |
| EHSPSPSLLS | SSFDDLDFYDFQR      | HNRPC_HUMAN |             |             | Heterogeneous nuclear ribonucleoproteins C1/C2; | 0.20                            | 0.01                  | 44.00                | -5.56 |
| EQKAAKLKEK | YEKDIAAYR          | HMGB1_HUMAN | HMGB2_HUMAN |             | High mobility group protein B1;                 | 0.32                            | 0.01                  | 27.60                | -3.46 |
| ACLASGSVLR | LVDAVLGAEIR        | HDAC6_HUMAN |             |             | Histone deacetylase 6;                          | 4.57                            | 0.73                  | 30.40                | -5.15 |
| VGMSLVALKK | ALAAAGYDVEKNNSR    | H11_HUMAN   | H12_HUMAN   | H13_HUMAN   | Histone H1.1;                                   | 0.49                            | 0.03                  | 35.60                | -4.37 |
| KTKAVSRQR  | AGLQFPVGR          | H2A1A_HUMAN | H2A1B_HUMAN | H2A1C_HUMAN | Histone H2A type 1-A;                           | 2.01                            | 0.07                  | 40.40                | -1.23 |
| YMAAVLEYLT | AEILELAGNAAR       | H2A1B_HUMAN | H2A1C_HUMAN | H2A1D_HUMAN | Histone H2A type 1-B/E;                         | 0.20                            | 0.02                  | 52.00                | 1.35  |
| VYMAAVLEYL | TAEILELAGNAAR      | H2A1B_HUMAN | H2A1C_HUMAN | H2A1D_HUMAN | Histone H2A type 1-B/E;                         | -1.16                           | 0.05                  | 46.50                | -2.42 |
| GISSKAMGIM | NSFVNDIFER         | H2B1B_HUMAN | H2B1C_HUMAN | H2B1D_HUMAN | Histone H2B type 1-B;                           | 0.67                            | 0.03                  | 32.50                | -0.24 |
| ISSKAMGIMN | SFVNDIFER          | H2B1B_HUMAN | H2B1C_HUMAN | H2B1D_HUMAN | Histone H2B type 1-B;                           | -0.55                           | 0.02                  | 36.20                | -1.47 |
| ALREIRRYQK | STELLIR            | H31T_HUMAN  | H31_HUMAN   | H32_HUMAN   | Histone H3.1t;                                  | 3.61                            | 0.22                  | 27.60                | -3.25 |
| RLARRGGVKR | ISGLIYEETR         | H4_HUMAN    |             |             | Histone H4;                                     | 2.11                            | 0.18                  | 48.00                | -5.29 |
| CDLPKISQLD | GVDDGTESDTSVTATTR  | MLL1_HUMAN  |             |             | Histone-lysine N-methyltransferase MLL;         | 0.53                            | 0.07                  | 85.50                | -1.49 |
| QNKALSSAVQ | ASPTSPGGSPSSSSGQR  | MLL1_HUMAN  |             |             | Histone-lysine N-methyltransferase MLL;         | 0.28                            | 0.03                  | 48.30                | 1.43  |
| IATYQANYGF | SNDGASSSTANVEDVHAR | HTSF1_HUMAN |             |             | HIV Tat-specific factor 1;                      | 0.45                            | 0.05                  | 53.00                | -2.75 |
| EREERLRGWE | AFLNAPEANR         | HTSF1_HUMAN |             |             | HIV Tat-specific factor 1;                      | 0.24                            | 0.01                  | 29.60                | -3.16 |
| SEAGSHTVQR | MYGCDVGSQWR        | 1A02_HUMAN  | 1A69_HUMAN  |             | HLA class I                                     | 3.30                            | 0.24                  | 36.80                | -1.24 |



Table S5

| Non-prime   | Prime                  | Id 1        | Id 2       | Id 3       | Protein (Id1)                                       | Fold-change (log <sub>2</sub> ) | Fc standard deviation | X! Tandem hyperscore | ppm   |
|-------------|------------------------|-------------|------------|------------|-----------------------------------------------------|---------------------------------|-----------------------|----------------------|-------|
| AVGYVDDTQF  | VRFSDAASQR             | 1A02_HUMAN  | 1A03_HUMAN | 1A11_HUMAN | HLA class I                                         | -0.47                           | 0.02                  | 44.80                | -1.01 |
| ISVGYYVDDTQ | FVRFDNDAASPR           | HLAE_HUMAN  |            |            | HLA class I                                         | 0.62                            | 0.03                  | 30.10                | -2.04 |
| SRPGRGEPFR  | IAVGYVDDTQFVR          | 1B15_HUMAN  | 1A01_HUMAN | 1A02_HUMAN | HLA class I<br>histocompatibility                   | -3.66                           | 0.46                  | 52.30                | -0.07 |
| PAEITLTWQR  | DGEDQTQDTELVEVTRPAGDR  | 1B07_HUMAN  | 1B08_HUMAN | 1B13_HUMAN | HLA class I<br>histocompatibility                   | 3.75                            | 0.35                  | 34.80                | -0.44 |
| ISVGYYVDDTQ | FVRFDNDAASPR           | 1B07_HUMAN  | 1B08_HUMAN | 1B14_HUMAN | HLA class I<br>histocompatibility                   | 0.65                            | 0.03                  | 35.90                | -1.22 |
| SVGYVDDTQF  | VRFSDAASPR             | 1B07_HUMAN  | 1B08_HUMAN | 1B14_HUMAN | HLA class I                                         | 0.16                            | 0.01                  | 40.00                | -1.75 |
| AGEPRFISVG  | YVDDTQFVR              | 1B07_HUMAN  | 1A01_HUMAN | 1A02_HUMAN | HLA class I<br>HLA class I                          | 0.09                            | 0.01                  | 29.30                | -4.84 |
| AVGYVDDTQF  | VQFSDAASPR             | 1C05_HUMAN  | 1C08_HUMAN |            | histocompatibility<br>antigen, Cw-5 alpha<br>chain; | 2.84                            | 0.24                  | 30.10                | 6.14  |
| SEAGSHTIQR  | MYGCDLGPDGR            | 1C06_HUMAN  | 1B13_HUMAN | 1B35_HUMAN | HLA class I                                         | 3.87                            | 0.25                  | 41.10                | 5.91  |
| EAAREAEQRR  | AYLEGTCVEWLR           | 1C06_HUMAN  | 1A02_HUMAN | 1A29_HUMAN | HLA class I                                         | 3.03                            | 0.16                  | 56.20                | 0.85  |
| DYIALNEDLR  | SWTAADTAAQITQR         | 1C06_HUMAN  | 1B07_HUMAN | 1B08_HUMAN | HLA class I<br>histocompatibility                   | 2.90                            | 0.18                  | 55.40                | 1.42  |
| GYVDDTQFVR  | FSDAASPR               | 1C06_HUMAN  | 1B07_HUMAN | 1B08_HUMAN | HLA class I                                         | 2.58                            | 0.65                  | 33.60                | -4.42 |
| GAGEPRFISV  | GYVDDTQFVR             | 1C06_HUMAN  | 1A01_HUMAN | 1A02_HUMAN | HLA class I                                         | 0.20                            | 0.01                  | 41.20                | -1.87 |
| FDLDPETPAN  | GYRSLVHTAR             | LIPS_HUMAN  |            |            | Hormone-sensitive lipase;                           | 1.53                            | 0.07                  | 25.00                | 0.92  |
| LTRAVTTVTQ  | STPVPGPSVPPPEELQVSPGPR | HCFC1_HUMAN |            |            | Host cell factor 1;                                 | 0.65                            | 0.05                  | 54.40                | 2.44  |
| AFKVKPFVVR  | DAVVYPILVEFTR          | HYOU1_HUMAN |            |            | Hypoxia up-regulated                                | 1.53                            | 0.31                  | 34.50                | -1.29 |
| LLMLGMGCWA  | REVLVPEGPLYR           | IGSF8_HUMAN |            |            | Immunoglobulin<br>superfamily member 8;             | -1.49                           | 0.08                  | 39.40                | -3.76 |
| WTLSNLCRNK  | NPAPPIDAVEQILPTLVR     | IMA2_HUMAN  |            |            | Importin subunit alpha-2;                           | -0.16                           | 0.02                  | 37.70                | -1.97 |
| KRRNVSSFPD  | DATSPLQENR             | IMA2_HUMAN  |            |            | Importin subunit alpha-2;                           | -1.55                           | 0.05                  | 49.60                | -4.55 |
| EAAMFDSLLM  | DSYVSSTTGESVITR        | IMA7_HUMAN  |            |            | Importin subunit alpha-7;                           | 0.31                            | 0.04                  | 60.00                | 2.14  |
| LEAAQKFLER  | AAVENLPTFLVELSR        | IMB1_HUMAN  |            |            | Importin subunit beta-1;                            | 3.35                            | 0.45                  | 51.90                | -1.66 |

Table S5

| Non-prime  | Prime                     | Id 1        | Id 2 | Id 3 | Protein (Id1)                                 | Fold-change (log <sub>2</sub> ) | Fc standard deviation | X! Tandem hyperscore | ppm   |
|------------|---------------------------|-------------|------|------|-----------------------------------------------|---------------------------------|-----------------------|----------------------|-------|
| LLPLGGTQT  | AIVFIKQPSSQDALQGR         | PTK7_HUMAN  |      |      | Inactive tyrosine-protein kinase 7;           | 0.49                            | 0.04                  | 55.10                | -0.57 |
| LCCRRDHYVD | FQELGWR                   | INHBE_HUMAN |      |      | Inhibin beta E chain;                         | 2.27                            | 0.16                  | 24.20                | -3.53 |
| LFSDVCRVES | GENCSSPAPR                | ITPR1_HUMAN |      |      | Inositol 1,4,5-trisphosphate receptor type 1; | -3.92                           | 0.00                  | 30.10                | 3.15  |
| LTSAEVIVPR | DQTPDENEEVIVR             | IF2B2_HUMAN |      |      | Insulin-like growth factor                    | 0.78                            | 0.05                  | 63.90                | 0.44  |
| FLAFASCCIA | AYRPSSETLCGGELVDTLQFVCGDR | IGF2_HUMAN  |      |      | Insulin-like growth factor II;                | 0.40                            | 0.02                  | 79.60                | 1.08  |
| WQCAPCSAEK | LALCPPVSASCSEVTR          | IBP1_HUMAN  |      |      | Insulin-like growth factor-binding protein 1; | 5.82                            | 0.55                  | 63.40                | 0.17  |
| VSASCSEVTR | SAGCGCCPMCALPLGAACGVATAI  | IBP1_HUMAN  |      |      | Insulin-like growth factor-                   | 2.67                            | 0.19                  | 61.90                | -0.64 |
| LTVQVGVTAG | APWQCAPCSAEKLALCPPVSASCS  | IBP1_HUMAN  |      |      | Insulin-like growth factor-                   | 0.32                            | 0.01                  | 55.30                | -0.72 |
| FRCPPCTPER | LAACGPPPVAAPAAVAAGGAR     | IBP2_HUMAN  |      |      | Insulin-like growth factor-binding protein 2; | 7.57                            | 0.44                  | 86.60                | -1.21 |
| KLIQGAPTIR | GDPECHLFYNEQQEAR          | IBP2_HUMAN  |      |      | Insulin-like growth factor-binding protein 2; | 7.06                            | 0.69                  | 67.80                | -3.91 |
| PKKLRPPPAR | TPCQQELDQVLER             | IBP2_HUMAN  |      |      | Insulin-like growth factor-                   | 6.64                            | 0.50                  | 52.10                | -1.46 |
| GCGCCSVCAR | LEGEACGVYTPR              | IBP2_HUMAN  |      |      | Insulin-like growth factor-                   | 3.50                            | 0.22                  | 45.80                | -2.03 |
| CWCVNPNTGK | LIQGAPTIR                 | IBP2_HUMAN  |      |      | Insulin-like growth factor-binding protein 2; | 3.15                            | 0.19                  | 33.50                | -4.01 |
| QCKMSLNGQR | GECWCVNPNTGKLIQGAPTIR     | IBP2_HUMAN  |      |      | Insulin-like growth factor-binding protein 2; | 2.72                            | 0.20                  | 42.20                | -2.22 |
| ARMPCAELVR | EPGCGCCSVCAR              | IBP2_HUMAN  |      |      | Insulin-like growth factor-                   | 1.70                            | 0.13                  | 35.80                | -3.61 |
| YTERCGSGLR | CQPSPDEARPLQALLDGR        | IBP3_HUMAN  |      |      | Insulin-like growth factor-binding protein 3; | 4.39                            | 0.13                  | 28.10                | 0.97  |
| RGPPVARAGA | SSAGLGPVVR                | IBP3_HUMAN  |      |      | Insulin-like growth factor-                   | 2.60                            | 0.11                  | 38.00                | -1.54 |

Table S5

| Non-prime  | Prime                   | Id 1        | Id 2 | Id 3 | Protein (Id1)                                 | Fold-change (log <sub>2</sub> ) | Fc standard deviation | X! Tandem hyperscore | ppm   |
|------------|-------------------------|-------------|------|------|-----------------------------------------------|---------------------------------|-----------------------|----------------------|-------|
| LLRGPPVARA | GASSAGLGPVVR            | IBP3_HUMAN  |      |      | Insulin-like growth factor-binding protein 3; | 2.42                            | 0.20                  | 55.30                | -4.61 |
| VVRCEPCDAR | ALAQCAPPVCAELVR         | IBP3_HUMAN  |      |      | Insulin-like growth factor-binding protein 3; | 2.23                            | 0.12                  | 65.10                | 0.43  |
| GHAQDSQRYK | VDYESQSTDTQNFSSSESKR    | IBP3_HUMAN  |      |      | Insulin-like growth factor-binding protein 3; | 1.74                            | 0.22                  | 21.70                | -1.59 |
| GNAESEEDR  | SAGSVESPSVSSTHR         | IBP3_HUMAN  |      |      | Insulin-like growth factor-                   | 1.47                            | 0.06                  | 40.70                | -0.92 |
| LERLAASQSR | THEDLYIIPNCDR           | IBP4_HUMAN  |      |      | Insulin-like growth factor-                   | 5.05                            | 0.20                  | 35.60                | -2.44 |
| VKLPGGLEPK | GELDCHQLADSR            | IBP4_HUMAN  |      |      | Insulin-like growth factor-binding protein 4; | 4.62                            | 0.35                  | 45.20                | -0.12 |
| PPCSEEKLAR | CRPPVGCEELVR            | IBP4_HUMAN  |      |      | Insulin-like growth factor-                   | 2.99                            | 0.17                  | 40.10                | -3.33 |
| LAAGPGPSLG | DEAIHCPPCSEEKLAR        | IBP4_HUMAN  |      |      | Insulin-like growth factor-                   | -0.76                           | 0.04                  | 35.60                | -2.27 |
| QDTEMGPCRR | HLDSVLQQLQTEVYR         | IBP6_HUMAN  |      |      | Insulin-like growth factor-binding protein 6; | 5.89                            | 0.39                  | 81.00                | 0.75  |
| QCRSSQGQRR | GPCWCVDR                | IBP6_HUMAN  |      |      | Insulin-like growth factor-binding protein 6; | 2.42                            | 0.18                  | 37.70                | -2.13 |
| QGVQAGCPGG | CVVEEDGGSPAEGCAEAEGCLRR | IBP6_HUMAN  |      |      | Insulin-like growth factor-binding protein 6; | 2.32                            | 0.16                  | 36.00                | -3.04 |
| LQQLQTEVYR | GAQTLYVPNCDHR           | IBP6_HUMAN  |      |      | Insulin-like growth factor-                   | 2.14                            | 0.11                  | 63.20                | -0.64 |
| LAASPGGALA | RCPGCGQGVQAGCPGGCVVEEDG | IBP6_HUMAN  |      |      | Insulin-like growth factor-                   | 1.81                            | 0.16                  | 95.00                | 2.24  |
| GTSTTPSQPN | SAGVQDTEMGPCRR          | IBP6_HUMAN  |      |      | Insulin-like growth factor-                   | 1.02                            | 0.07                  | 26.60                | -3.01 |
| LQTEVYRGAQ | TLYVPNCDHR              | IBP6_HUMAN  |      |      | Insulin-like growth factor-                   | 0.92                            | 0.04                  | 24.70                | -2.15 |
| EMGPCRRHLD | SVLQQLQTEVYR            | IBP6_HUMAN  |      |      | Insulin-like growth factor-binding protein 6; | 0.61                            | 0.04                  | 64.00                | 1.88  |
| DTEMGPCRRH | LDSVLQQLQTEVYR          | IBP6_HUMAN  |      |      | Insulin-like growth factor-binding protein 6; | 0.06                            | 0.00                  | 72.00                | 3.82  |
| GPCRRHLDV  | LQQLQTEVYR              | IBP6_HUMAN  |      |      | Insulin-like growth factor-binding protein 6; | -0.27                           | 0.02                  | 29.90                | -1.38 |
| RETIKGIQKR | EASNCFAIR               | ITM2B_HUMAN |      |      | Integral membrane protein 2B;                 | 0.08                            | 0.00                  | 43.10                | -1.00 |

Table S5

| Non-prime  | Prime                   | Id 1        | Id 2 | Id 3 | Protein (Id1)                                               | Fold-change (log <sub>2</sub> ) | Fc standard deviation | X! Tandem hyperscore | ppm   |
|------------|-------------------------|-------------|------|------|-------------------------------------------------------------|---------------------------------|-----------------------|----------------------|-------|
| TIKGIQKREA | SNCFAIR                 | ITM2B_HUMAN |      |      | Integral membrane protein 2B;                               | 0.06                            | 0.00                  | 32.90                | -0.11 |
| ETIKGIQKRE | ASNCFAIR                | ITM2B_HUMAN |      |      | Integral membrane protein 2B;                               | -0.20                           | 0.01                  | 29.40                | -3.62 |
| PNSDPPFSFK | NVISLTEDVDEFR           | ITB4_HUMAN  |      |      | Integrin beta-4;                                            | 3.13                            | 0.14                  | 40.20                | -1.59 |
| DRSFTSQMLS | SQPPPHGDLGAPQNPNAKAAGSR | ITB4_HUMAN  |      |      | Integrin beta-4;                                            | 0.13                            | 0.01                  | 50.40                | -2.39 |
| VEQRAFHDLK | VAPGYTTLADQDAR          | ITB4_HUMAN  |      |      | Integrin beta-4;                                            | -0.44                           | 0.04                  | 32.70                | -1.97 |
| GKTCECDDRR | CEDLDGVVCGGHGTCSGR      | ITGBL_HUMAN |      |      | Integrin beta-like protein 1;                               | 7.02                            | 1.19                  | 75.30                | -2.21 |
| ERDCRAVYDR | YSDDFCSGHGQCNCGR        | ITGBL_HUMAN |      |      | Integrin beta-like protein 1;                               | 6.50                            | 1.11                  | 29.80                | 0.36  |
| TKKKSQMCK  | NSQDIICSNAGTCHCGR       | ITGBL_HUMAN |      |      | Integrin beta-like protein 1;                               | 3.44                            | 0.50                  | 46.60                | 0.56  |
| DCKAGWYGKK | CEHPQSCTLSAEEISIR       | ITGBL_HUMAN |      |      | Integrin beta-like protein 1;                               | 3.21                            | 0.33                  | 43.30                | -2.64 |
| YKEILLTGL  | DNITDEELDR              | AIM2_HUMAN  |      |      | Interferon-inducible Interleukin enhancer-binding factor 3; | 5.48                            | 0.39                  | 32.30                | -2.80 |
| AIGHLDRQR  | EDITQSAQHALR            | ILF3_HUMAN  |      |      | Interleukin enhancer-binding factor 3;                      | 1.86                            | 0.14                  | 34.80                | -1.00 |
| HVAVKVLQDM | GLPTGAEGR               | ILF3_HUMAN  |      |      | Interleukin enhancer-binding factor 3;                      | 0.53                            | 0.03                  | 32.10                | -2.35 |
| KLHVAVKVLQ | DMGLPTGAEGR             | ILF3_HUMAN  |      |      | Interleukin enhancer-binding factor 3;                      | 0.29                            | 0.02                  | 27.00                | -2.56 |
| YFYGILQSDA | SERCDDWGLDTMR           | IL1AP_HUMAN |      |      | Interleukin-1 receptor accessory protein;                   | 0.64                            | 0.06                  | 34.10                | -0.54 |
| DPPRATEPVA | TSNPAGDPVGSTR           | INF2_HUMAN  |      |      | Inverted formin-2;                                          | 1.20                            | 0.05                  | 30.40                | -2.10 |
| RPSPLVKAHK | SVQANLDQSQR             | INF2_HUMAN  |      |      | Inverted formin-2;                                          | 0.74                            | 0.04                  | 53.80                | -2.03 |
| GDAQALKPLK | FSSNQPPAAGSSR           | INF2_HUMAN  |      |      | Inverted formin-2;                                          | -0.20                           | 0.01                  | 28.80                | 1.50  |
| ASLGPQARRE | ASSSSPEAGEGQIR          | ISCA2_HUMAN |      |      | Iron-sulfur cluster assembly 2 homolog,                     | 0.20                            | 0.02                  | 47.90                | -4.06 |
| AAVALPGSGA | EGDGGWRPGPGAVAEER       | JMJD8_HUMAN |      |      | JmjC domain-containing                                      | 0.08                            | 0.01                  | 40.30                | -0.41 |
| AILLCSLALG | SVTVHSSEPEVR            | JAM1_HUMAN  |      |      | Junctional adhesion molecule A;                             | -0.27                           | 0.02                  | 29.80                | -4.33 |
| LLSLALETAG | EEAQGDKIIDGAPCAR        | KLK7_HUMAN  |      |      | Kallikrein-7;                                               | 2.28                            | 0.18                  | 39.10                | -1.96 |
| AAHCKMNEYT | VHLGSDTLGDR             | KLK7_HUMAN  |      |      | Kallikrein-7;                                               | -9.97                           | 0.00                  | 29.50                | -0.91 |

Table S5

| Non-prime  | Prime             | Id 1        | Id 2        | Id 3 | Protein (Id1)                    | Fold-change (log <sub>2</sub> ) | Fc standard deviation | X! Tandem hyperscore | ppm   |
|------------|-------------------|-------------|-------------|------|----------------------------------|---------------------------------|-----------------------|----------------------|-------|
| QLRLALLVAA | GAPEVLVSAPR       | KDEL2_HUMAN |             |      | KDEL motif-containing protein 2; | -0.27                           | 0.02                  | 53.50                | -3.56 |
| VRRGLAGATT | LGDMIYVSGGFDGSR   | KLH12_HUMAN |             |      | Kelch-like protein 12;           | -4.24                           | 0.80                  | 25.20                | 2.67  |
| GYGSSFGGVD | GLLAGGEKATMQNLNDR | K1C17_HUMAN |             |      | Keratin, type I cytoskeletal 17; | 0.83                            | 0.09                  | 48.20                | 0.05  |
| ILGATIENSR | IVLQIDNAR         | K1C18_HUMAN | K1C19_HUMAN |      | Keratin, type I cytoskeletal 18; | 6.20                            | 0.66                  | 40.40                | -4.11 |
| SVENDIHGLR | KVIDDTNITR        | K1C18_HUMAN |             |      | Keratin, type I cytoskeletal 18; | 5.87                            | 1.17                  | 32.70                | -0.73 |
| SLEIDLDSMR | NLKASLENSLR       | K1C18_HUMAN |             |      | Keratin, type I cytoskeletal 18; | 5.25                            | 0.50                  | 32.10                | -1.46 |
| AETTLTELRR | TVQSLEIDLDSMR     | K1C18_HUMAN |             |      | Keratin, type I cytoskeletal 18; | 5.18                            | 0.22                  | 53.60                | -3.39 |
| AAETTLTEL  | RTVQSLEIDLDSMR    | K1C18_HUMAN |             |      | Keratin, type I cytoskeletal 18; | 2.85                            | 0.11                  | 31.90                | -0.18 |
| HYFKIIEDLR | AQIFANTVDNAR      | K1C18_HUMAN |             |      | Keratin, type I cytoskeletal 18; | 1.88                            | 0.14                  | 44.50                | -1.11 |
| VKYETELAMR | QSVENDIHGLR       | K1C18_HUMAN |             |      | Keratin, type I cytoskeletal 18; | 1.30                            | 0.13                  | 38.40                | -1.31 |
| GWFGEGILT  | NEKETMQSLNDR      | K1C18_HUMAN | KRT35_HUMAN |      | Keratin, type I cytoskeletal 18; | 0.76                            | 0.06                  | 22.90                | -3.06 |
| IDLDSMRNLK | ASLENSLR          | K1C18_HUMAN |             |      | Keratin, type I                  | 0.75                            | 0.02                  | 29.20                | -4.35 |
| STTVVTTQSA | EVGAAETTLTEL      | K1C18_HUMAN |             |      | Keratin, type I cytoskeletal 18; | 0.60                            | 0.05                  | 51.80                | -2.60 |
| GIAGGLAGMG | GIQNEKETMQSLNDR   | K1C18_HUMAN |             |      | Keratin, type I                  | 0.57                            | 0.04                  | 42.50                | 6.66  |
| TVVTTQSAEV | GAAETTLTEL        | K1C18_HUMAN |             |      | Keratin, type I cytoskeletal 18; | 0.52                            | 0.02                  | 44.60                | -0.76 |
| DLAKIMADIR | AQYDELAR          | K1C18_HUMAN |             |      | Keratin, type I cytoskeletal 18; | 0.29                            | 0.01                  | 33.90                | -2.01 |

Table S5

| Non-prime  | Prime                   | Id 1        | Id 2 | Id 3 | Protein (Id1)                       | Fold-change (log <sub>2</sub> ) | Fc standard deviation | X! Tandem hyperscore | ppm   |
|------------|-------------------------|-------------|------|------|-------------------------------------|---------------------------------|-----------------------|----------------------|-------|
| YFKIIEDLRA | QIFANTVDNAR             | K1C18_HUMAN |      |      | Keratin, type I                     | 0.14                            | 0.01                  | 40.10                | -1.17 |
| RGGMGSGGLA | TGIAGGLAGMGGIQNEKETMQL  | K1C18_HUMAN |      |      | Keratin, type I                     | 0.14                            | 0.01                  | 70.50                | -1.58 |
| TVEVDAPKSQ | DLAKIMADIR              | K1C18_HUMAN |      |      | Keratin, type I<br>cytoskeletal 18; | 0.02                            | 0.00                  | 23.10                | -2.08 |
| TGIAGGLAGM | GGIQNEKETMQLNDR         | K1C18_HUMAN |      |      | Keratin, type I<br>cytoskeletal 18; | 0.02                            | 0.00                  | 41.80                | 1.22  |
| TNYRSLGSVQ | APSYGARPVSSAASVYAGAGGSG | K1C18_HUMAN |      |      | Keratin, type I<br>cytoskeletal 18; | -0.12                           | 0.01                  | 45.80                | -1.25 |
| ELRRTVQSLE | IDLDSMR                 | K1C18_HUMAN |      |      | Keratin, type I<br>cytoskeletal 18; | -0.12                           | 0.01                  | 20.20                | -2.83 |
| LEDGEDFNLD | DALDSSNSMQTIQKTTTR      | K1C18_HUMAN |      |      | Keratin, type I<br>cytoskeletal 18; | -0.18                           | 0.02                  | 32.20                | -1.07 |
| QIEESTTVVT | TQSAEVGAAETTLTEL        | K1C18_HUMAN |      |      | Keratin, type I                     | -0.18                           | 0.01                  | 85.20                | -1.77 |
| LTELRRTVQS | LEIDLDSMR               | K1C18_HUMAN |      |      | Keratin, type I<br>cytoskeletal 18; | -0.23                           | 0.02                  | 26.50                | 1.78  |
| IEESTTVVTT | QSAEVGAAETTLTEL         | K1C18_HUMAN |      |      | Keratin, type I<br>cytoskeletal 18; | -0.23                           | 0.02                  | 80.60                | -0.70 |
| VQAPSYGARP | VSSAASVYAGAGGSGSR       | K1C18_HUMAN |      |      | Keratin, type I<br>cytoskeletal 18; | -0.23                           | 0.02                  | 72.30                | -2.63 |
| LGSVQAPSYG | ARPVSSAASVYAGAGGSGSR    | K1C18_HUMAN |      |      | Keratin, type I                     | -0.29                           | 0.02                  | 83.80                | -2.77 |
| GLTVEVDAPK | SQDLAKIMADIR            | K1C18_HUMAN |      |      | Keratin, type I                     | -0.29                           | 0.02                  | 35.80                | -0.49 |
| TFSTNYRSLG | SVQAPSYGARPVSSAASVYAGAG | K1C18_HUMAN |      |      | Keratin, type I<br>cytoskeletal 18; | -0.34                           | 0.04                  | 63.60                | -1.29 |
| SLGSVQAPSY | GARPVSSAASVYAGAGGSGSR   | K1C18_HUMAN |      |      | Keratin, type I                     | -0.39                           | 0.04                  | 84.50                | 1.53  |
| ESTTVVTTQS | AEVGAAETTLTEL           | K1C18_HUMAN |      |      | Keratin, type I<br>cytoskeletal 18; | -0.47                           | 0.04                  | 81.60                | -0.53 |
| APSYGARPVS | SAASVYAGAGGSGSR         | K1C18_HUMAN |      |      | Keratin, type I<br>cytoskeletal 18; | -0.49                           | 0.04                  | 76.10                | -1.20 |
| ESTTVVTTQS | AEVGAAETTLTELRR         | K1C18_HUMAN |      |      | Keratin, type I<br>cytoskeletal 18; | -0.52                           | 0.05                  | 23.60                | -0.61 |

Table S5

| Non-prime  | Prime                     | Id 1        | Id 2        | Id 3 | Protein (Id1)                     | Fold-change (log <sub>2</sub> ) | Fc standard deviation | X! Tandem hyperscore | ppm   |
|------------|---------------------------|-------------|-------------|------|-----------------------------------|---------------------------------|-----------------------|----------------------|-------|
| EESTTVVTTQ | SAEVGAAETTLTEL            | K1C18_HUMAN |             |      | Keratin, type I cytoskeletal 18;  | -0.52                           | 0.05                  | 76.50                | -1.71 |
| EESTTVVTTQ | SAEVGAAETTLTELRR          | K1C18_HUMAN |             |      | Keratin, type I cytoskeletal 18;  | -0.55                           | 0.02                  | 28.60                | -4.48 |
| TRSTFSTNYR | SLGSVQAPSYGAR             | K1C18_HUMAN |             |      | Keratin, type I cytoskeletal 18;  | -0.58                           | 0.03                  | 52.20                | -2.86 |
| NEKETMQSLN | DRLASYLDR                 | K1C18_HUMAN |             |      | Keratin, type I cytoskeletal 18;  | -0.79                           | 0.08                  | 35.50                | -1.40 |
| GSVQAPSYGA | RPVSSAASVYAGAGGSGSR       | K1C18_HUMAN |             |      | Keratin, type I cytoskeletal 18;  | -0.82                           | 0.07                  | 53.90                | -1.92 |
| YWSQIEEST  | TVVTTQSAEVGAAETTLTEL      | K1C18_HUMAN |             |      | Keratin, type I cytoskeletal 18;  | -0.86                           | 0.08                  | 94.60                | 4.84  |
| ELDKYWSQI  | EESTTVVTTQSAEVGAAETTLTELI | K1C18_HUMAN |             |      | Keratin, type I                   | -0.89                           | 0.10                  | 45.90                | -0.43 |
| SHYFKIIEDL | RAQIFANTVDNAR             | K1C18_HUMAN |             |      | Keratin, type I cytoskeletal 18;  | -0.93                           | 0.11                  | 58.70                | 0.46  |
| VVTTQSAEVG | AAETTLTEL                 | K1C18_HUMAN |             |      | Keratin, type I cytoskeletal 18;  | -0.96                           | 0.08                  | 41.00                | -3.00 |
| TRSTFSTNYR | SLGSVQAPSYGARPVSSAASVYAG  | K1C18_HUMAN |             |      | Keratin, type I cytoskeletal 18;  | -0.96                           | 0.08                  | 61.70                | -0.59 |
| GYGGVLTASD | GLLAGNEKLTMQNLNDR         | K1C19_HUMAN |             |      | Keratin, type I cytoskeletal 19;  | 0.00                            | 0.00                  | 31.10                | -1.85 |
| GLDIEIATYR | RLLEGEESR                 | KRT84_HUMAN |             |      | Keratin, type II cuticular        | 4.50                            | 0.17                  | 15.90                | 1.07  |
| VNQSLTPLN  | LQIDPSIQR                 | K2C5_HUMAN  |             |      | Keratin, type II cytoskeletal 5;  | 0.21                            | 0.02                  | 29.70                | -1.00 |
| GASRPRVAVR | SAYGGPVGAGIR              | K2C7_HUMAN  |             |      | Keratin, type II cytoskeletal 7;  | -3.25                           | 0.31                  | 51.00                | -9.74 |
| SVILSMDNNR | NLDLDSIIDEVR              | K2C71_HUMAN |             |      | Keratin, type II cytoskeletal 71; | -2.34                           | 0.12                  | 29.50                | 0.63  |
| EIESVKKQCA | NLETAIADAEQR              | K2C73_HUMAN | K2C71_HUMAN |      | Keratin, type II                  | 2.80                            | 0.19                  | 44.70                | -2.65 |
| ELAIKDANAK | LSELEAALQR                | K2C8_HUMAN  |             |      | Keratin, type II cytoskeletal 8;  | 4.14                            | 0.22                  | 47.70                | -2.68 |
| GLTDEINFLR | QLYEEEIR                  | K2C8_HUMAN  |             |      | Keratin, type II cytoskeletal 8;  | 2.74                            | 0.17                  | 31.80                | -0.27 |

Table S5

| Non-prime  | Prime             | Id 1       | Id 2        | Id 3       | Protein (Id1)                    | Fold-change (log <sub>2</sub> ) | Fc standard deviation | X! Tandem hyperscore | ppm   |
|------------|-------------------|------------|-------------|------------|----------------------------------|---------------------------------|-----------------------|----------------------|-------|
| YMNKVELESR | LEGLTDEINFLR      | K2C8_HUMAN |             |            | Keratin, type II                 | 2.66                            | 0.19                  | 59.90                | -0.76 |
| AEIEGLKQQR | ASLEAAIADAEQR     | K2C8_HUMAN |             |            | Keratin, type II cytoskeletal 8; | 2.25                            | 0.19                  | 59.70                | -1.67 |
| LDMSIIAEV  | KAQYEDIANR        | K2C8_HUMAN | K2C75_HUMAN |            | Keratin, type II cytoskeletal 8; | 1.49                            | 0.12                  | 24.40                | -1.96 |
| SVVLSMDNSR | SLDMSIIAEVK       | K2C8_HUMAN |             |            | Keratin, type II                 | 0.73                            | 0.05                  | 56.60                | -1.87 |
| VTVNQSLSP  | LVLEVPNIQAVR      | K2C8_HUMAN |             |            | Keratin, type II                 | 0.64                            | 0.05                  | 55.30                | -1.27 |
| NQSLLSPLVL | EVDPNIQAVR        | K2C8_HUMAN |             |            | Keratin, type II cytoskeletal 8; | 0.53                            | 0.06                  | 37.20                | -0.60 |
| EMNRNISRLQ | AEIEGLKQQR        | K2C8_HUMAN |             |            | Keratin, type II                 | 0.40                            | 0.02                  | 38.90                | -1.45 |
| LAIKDANAKL | SELEAALQR         | K2C8_HUMAN |             |            | Keratin, type II cytoskeletal 8; | 0.38                            | 0.02                  | 37.30                | -3.14 |
| SLLQQQKTAR | SNMDNMFESYINNLRR  | K2C8_HUMAN |             |            | Keratin, type II cytoskeletal 8; | 0.35                            | 0.01                  | 42.60                | -1.28 |
| EQIKTLNKF  | ASFIDKVR          | K2C8_HUMAN | K22E_HUMAN  | K22O_HUMAN | Keratin, type II                 | 0.20                            | 0.02                  | 33.10                | -2.69 |
| SLLSPLVLEV | DPNIQAVR          | K2C8_HUMAN |             |            | Keratin, type II                 | 0.04                            | 0.00                  | 27.00                | -1.69 |
| KEQIKTLNKF | FASFIDKVR         | K2C8_HUMAN | K22E_HUMAN  | K22O_HUMAN | Keratin, type II cytoskeletal 8; | 0.02                            | 0.00                  | 19.40                | -0.26 |
| ITAVTVNQSL | LSPLVLEVPNIQAVR   | K2C8_HUMAN |             |            | Keratin, type II                 | 0.00                            | 0.00                  | 76.30                | -2.33 |
| QSLLSPLVLE | VDPNIQAVR         | K2C8_HUMAN |             |            | Keratin, type II cytoskeletal 8; | -0.02                           | 0.00                  | 31.00                | -3.75 |
| TSPGLSYSLG | SSFSGAGSSSFRTSSSR | K2C8_HUMAN |             |            | Keratin, type II cytoskeletal 8; | -0.04                           | 0.00                  | 21.90                | -1.65 |
| AEQRGELAIK | DANAKLSELEAALQR   | K2C8_HUMAN |             |            | Keratin, type II cytoskeletal 8; | -0.08                           | 0.00                  | 51.80                | -1.29 |
| PGLSYSLGSS | FGSGAGSSSFSR      | K2C8_HUMAN |             |            | Keratin, type II cytoskeletal 8; | -0.14                           | 0.01                  | 32.70                | -2.45 |
| VNQSLLSPLV | LEVDPNIQAVR       | K2C8_HUMAN |             |            | Keratin, type II                 | -0.14                           | 0.01                  | 37.10                | -2.10 |
| TAVTVNQSLL | SPLVLEVPNIQAVR    | K2C8_HUMAN |             |            | Keratin, type II                 | -0.14                           | 0.01                  | 75.90                | -0.06 |
| TVNQSLLSPL | VLEVPNIQAVR       | K2C8_HUMAN |             |            | Keratin, type II                 | -0.16                           | 0.01                  | 40.20                | -1.52 |



Table S5

| Non-prime  | Prime                      | Id 1       | Id 2        | Id 3        | Protein (Id1)                    | Fold-change (log <sub>2</sub> ) | Fc standard deviation | X! Tandem hyperscore | ppm   |
|------------|----------------------------|------------|-------------|-------------|----------------------------------|---------------------------------|-----------------------|----------------------|-------|
| SPGLSYSLSG | SFGSGAGSSSFSR              | K2C8_HUMAN |             |             | Keratin, type II cytoskeletal 8; | -0.23                           | 0.02                  | 39.80                | -6.07 |
| YGGLTSPGLS | YSLGSSFGSGAGSSSFSR         | K2C8_HUMAN |             |             | Keratin, type II cytoskeletal 8; | -0.29                           | 0.03                  | 98.70                | -0.79 |
| GLSYSLGSSF | GSGAGSSSFSR                | K2C8_HUMAN |             |             | Keratin, type II cytoskeletal 8; | -0.34                           | 0.01                  | 28.00                | 4.28  |
| EGLKGQRASL | EAAIADAEQR                 | K2C8_HUMAN |             |             | Keratin, type II cytoskeletal 8; | -0.44                           | 0.02                  | 47.50                | -1.18 |
| GGLTSPGLSY | SLGSSFGSGAGSSSFSR          | K2C8_HUMAN |             |             | Keratin, type II cytoskeletal 8; | -0.49                           | 0.05                  | 85.90                | -1.18 |
| TSPGLSYSLG | SSFGSGAGSSSFSR             | K2C8_HUMAN |             |             | Keratin, type II cytoskeletal 8; | -0.52                           | 0.02                  | 80.80                | -2.07 |
| IEGLKGQRAS | LEAAIADAEQR                | K2C8_HUMAN |             |             | Keratin, type II                 | -0.55                           | 0.05                  | 39.90                | -1.72 |
| GLSSAYGGLT | SPGLSYSLSGSSFGSGAGSSSFSR   | K2C8_HUMAN |             |             | Keratin, type II cytoskeletal 8; | -0.55                           | 0.06                  | 97.10                | 0.05  |
| DMSIIAEVK  | AQYEDIANR                  | K2C8_HUMAN | K2C75_HUMAN |             | Keratin, type II cytoskeletal 8; | -0.58                           | 0.04                  | 40.90                | -1.71 |
| TTSGYAGGLS | SAYGGLTSPGLSYSLSGSSFGSGAGS | K2C8_HUMAN |             |             | Keratin, type II cytoskeletal 8; | -0.69                           | 0.06                  | 95.10                | 3.77  |
| MDSIIAEVKA | QYEDIANR                   | K2C8_HUMAN | K2C75_HUMAN |             | Keratin, type II cytoskeletal 8; | -0.79                           | 0.04                  | 23.40                | -4.60 |
| KHGDDLRRTK | TEISEMNR                   | K2C8_HUMAN |             |             | Keratin, type II cytoskeletal 8; | -0.82                           | 0.02                  | 30.50                | -3.25 |
| MNKVELESRL | EGLTDEINFLR                | K2C8_HUMAN |             |             | Keratin, type II                 | -1.00                           | 0.10                  | 51.00                | -0.90 |
| LEGLTDEINF | LRQLYEEEIR                 | K2C8_HUMAN |             |             | Keratin, type II cytoskeletal 8; | -1.04                           | 0.09                  | 33.50                | -0.72 |
| AYMNKVELES | RLEGLTDEINFLR              | K2C8_HUMAN |             |             | Keratin, type II cytoskeletal 8; | -1.34                           | 0.07                  | 30.10                | 0.25  |
| VELESRLEGL | TDEINFLR                   | K2C8_HUMAN | K2C6A_HUMAN | K2C6B_HUMAN | Keratin, type II cytoskeletal 8; | -1.34                           | 0.07                  | 32.50                | -1.45 |
| NKVELESRLE | GLTDEINFLR                 | K2C8_HUMAN |             |             | Keratin, type II cytoskeletal 8; | -1.39                           | 0.11                  | 39.40                | -3.79 |
| QDLLNVKMAL | DIEIATYR                   | K2C8_HUMAN | GFAP_HUMAN  | K2C4_HUMAN  | Keratin, type II cytoskeletal 8; | -1.49                           | 0.17                  | 31.00                | -2.08 |

Table S5

| Non-prime   | Prime                  | Id 1        | Id 2        | Id 3       | Protein (Id1)                                     | Fold-change (log <sub>2</sub> ) | Fc standard deviation | X! Tandem hyperscore | ppm   |
|-------------|------------------------|-------------|-------------|------------|---------------------------------------------------|---------------------------------|-----------------------|----------------------|-------|
| AARMSRSSGR  | SGSMDPSGAHPSVR         | KHDR1_HUMAN |             |            | KH domain-containing, RNA-binding, signal         | -0.10                           | 0.01                  | 32.30                | -2.53 |
| MSRSSGRSGS  | MDPSGAHPSVR            | KHDR1_HUMAN |             |            | KH domain-containing, Kin of IRRE-like protein 1; | -0.25                           | 0.01                  | 30.40                | 4.73  |
| HHPPTVTLSEI | EPQTVQEGER             | KIRR1_HUMAN |             |            | Kinectin;                                         | -9.97                           | 0.00                  | 28.60                | -3.06 |
| ESHKTIKQMQ  | SSFTSSEQELER           | KTN1_HUMAN  |             |            | Kinesin-like protein                              | 0.49                            | 0.04                  | 63.10                | -0.63 |
| GVPKRVIYELH | GSSPAVSSEECTPSR        | KIF14_HUMAN |             |            | L antigen family member                           | 0.98                            | 0.11                  | 55.90                | 4.05  |
| HSCRGGVDTA  | AAPAGGAPPAHAPGPR       | LAGE3_HUMAN |             |            | L-lactate dehydrogenase A                         | 0.08                            | 0.00                  | 35.90                | 1.01  |
| WKISGLPVTR  | VIGSGCNLDSAR           | LDHA_HUMAN  | LDH6A_HUMAN | LDHB_HUMAN | L-lactate dehydrogenase A chain;                  | 5.05                            | 0.49                  | 44.10                | -0.86 |
| GQNGISDLVK  | VTLTSEEEAR             | LDHA_HUMAN  |             |            | L-lactate dehydrogenase A chain;                  | 2.11                            | 0.11                  | 44.50                | -2.66 |
| IEDKCLKGEMM | DLQHGSFLR              | LDHA_HUMAN  |             |            | L-lactate dehydrogenase A                         | -2.16                           | 0.19                  | 29.00                | -1.80 |
| VIKDKLKGEM  | MDLQHGSFLR             | LDHA_HUMAN  |             |            | L-lactate dehydrogenase A                         | -2.79                           | 0.19                  | 36.30                | -2.59 |
| VAWKISGFPK  | NRVIGSGCNLDSAR         | LDH6A_HUMAN | LDHA_HUMAN  |            | L-lactate dehydrogenase                           | 0.60                            | 0.05                  | 38.70                | -2.51 |
| NCPEFVPRQH  | YQKETESAPGSPR          | LARP1_HUMAN |             |            | La-related protein 1;                             | 1.45                            | 0.17                  | 41.30                | -5.13 |
| PTDALANKLF  | GAPEPSTIAR             | LARP1_HUMAN |             |            | La-related protein 1;                             | 0.72                            | 0.03                  | 31.80                | -1.94 |
| QKNRVKQFR   | SSGGSEHSTEGSVSLGDGQLNR | LARP4_HUMAN |             |            | La-related protein 4;                             | 0.14                            | 0.02                  | 66.60                | -1.32 |
| IGPSKERTLS  | ADASVNTLPVVVSR         | LAR4B_HUMAN |             |            | La-related protein 4B;                            | 0.35                            | 0.04                  | 33.50                | -3.09 |
| TLLKVDLENR  | CQSLTEDLEFR            | LMNB1_HUMAN |             |            | Lamin-B1;                                         | 3.26                            | 0.22                  | 51.30                | -4.63 |
| TPVPPRMGSR  | AGGPTTPLSPTR           | LMNB1_HUMAN |             |            | Lamin-B1;                                         | 1.60                            | 0.08                  | 48.30                | -0.68 |
| VRGRELTGLK  | ALYETELADAR            | LMNB1_HUMAN |             |            | Lamin-B1;                                         | 1.01                            | 0.09                  | 39.90                | -0.31 |
| VRGRELTGLK  | ALYETELADARR           | LMNB1_HUMAN |             |            | Lamin-B1;                                         | 0.71                            | 0.05                  | 29.20                | 1.73  |
| LKVDLENRCQ  | SLTEDLEFR              | LMNB1_HUMAN |             |            | Lamin-B1;                                         | 0.35                            | 0.02                  | 26.40                | 3.15  |
| LLKVDLENRC  | QSLTEDLEFR             | LMNB1_HUMAN |             |            | Lamin-B1;                                         | 0.09                            | 0.01                  | 31.00                | -5.74 |
| HAKLENARLS  | SEMNTSTVNSAR           | LMNB1_HUMAN |             |            | Lamin-B1;                                         | -0.08                           | 0.01                  | 39.20                | -3.32 |
| TLMRVDLENR  | CQSLQEELDFR            | LMNB2_HUMAN |             |            | Lamin-B2;                                         | 2.92                            | 0.13                  | 51.40                | -1.38 |

Table S5

| Non-prime  | Prime               | Id 1        | Id 2        | Id 3 | Protein (Id1)                             | Fold-change (log <sub>2</sub> ) | Fc standard deviation | X! Tandem hyperscore | ppm   |
|------------|---------------------|-------------|-------------|------|-------------------------------------------|---------------------------------|-----------------------|----------------------|-------|
| MATPLPGR   | AGGPATPLSPTR        | LMNB2_HUMAN |             |      | Lamin-B2;                                 | 2.69                            | 0.20                  | 55.60                | -2.08 |
| ELAAALSDKR | GLESDVAELR          | LMNB2_HUMAN |             |      | Lamin-B2;                                 | 1.42                            | 0.08                  | 41.10                | -1.61 |
| NSKGPPDFSS | DEEREPTVLGSGAAAAGR  | LAP2A_HUMAN | LAP2B_HUMAN |      | Lamina-associated polypeptide 2, isoform  | -0.06                           | 0.01                  | 56.80                | -3.35 |
| KLREQGTESR | SSTPLPTISSAENTR     | LAP2B_HUMAN | LAP2A_HUMAN |      | Lamina-associated polypeptide 2, isoforms | 1.76                            | 0.10                  | 46.00                | -1.97 |
| ILKEMFPYEA | STPTGISASCR         | LAP2B_HUMAN |             |      | Lamina-associated polypeptide 2, isoforms | 1.10                            | 0.09                  | 34.00                | -5.89 |
| VNRVTGNFKH | ASPILPITEFSDIPR     | LAP2B_HUMAN |             |      | Lamina-associated polypeptide 2, isoforms | 0.97                            | 0.07                  | 60.40                | 0.77  |
| SCRRPIKGAA | GRPLELSDFR          | LAP2B_HUMAN |             |      | Lamina-associated                         | 0.86                            | 0.05                  | 35.20                | -1.56 |
| NRVTGNFKHA | SPILPITEFSDIPR      | LAP2B_HUMAN |             |      | Lamina-associated                         | 0.84                            | 0.05                  | 36.30                | 9.01  |
| VVNRVTGNFK | HASPILPITEFSDIPR    | LAP2B_HUMAN |             |      | Lamina-associated polypeptide 2, isoforms | 0.42                            | 0.01                  | 46.30                | -0.33 |
| HPLDSPHVCR | RCNCESDFTDGTCEDLTGR | LAMA5_HUMAN |             |      | Laminin subunit alpha-5;                  | 6.16                            | 1.19                  | 76.50                | -4.99 |
| ERLLWEMRAR | DLGAPQAAAEALAAAQR   | LAMA5_HUMAN |             |      | Laminin subunit alpha-5;                  | 5.78                            | 0.65                  | 108.00               | -3.59 |
| PYFNLAEGAR | IAASATCGEEAPAR      | LAMA5_HUMAN |             |      | Laminin subunit alpha-5;                  | 5.47                            | 0.59                  | 67.70                | -2.51 |
| NCQACTCDPR | GALDQLCGAGGLCR      | LAMA5_HUMAN |             |      | Laminin subunit alpha-5;                  | 5.00                            | 0.47                  | 68.00                | -4.94 |
| SCEPRTGVCR | CRPNTQGPTCSEPAR     | LAMA5_HUMAN |             |      | Laminin subunit alpha-5;                  | 4.94                            | 0.45                  | 46.20                | -0.80 |
| ELCLCPASYR | GDSCQECAPGFYR       | LAMA5_HUMAN |             |      | Laminin subunit alpha-5;                  | 4.68                            | 0.71                  | 59.30                | -2.48 |
| AAEAQDTATR | VQSQLQAMQENVER      | LAMA5_HUMAN |             |      | Laminin subunit alpha-5;                  | 4.63                            | 0.46                  | 63.30                | -3.38 |
| HYLPDLHHLR | LELEEAATPEGHAVR     | LAMA5_HUMAN |             |      | Laminin subunit alpha-5;                  | 4.30                            | 0.20                  | 50.40                | 4.78  |
| GPQTLERITR | DDAAICTTEYSR        | LAMA5_HUMAN |             |      | Laminin subunit alpha-5;                  | 4.17                            | 0.33                  | 54.80                | -2.10 |
| ASNAIDGTER | WWQSPPLSR           | LAMA5_HUMAN |             |      | Laminin subunit alpha-5;                  | 3.68                            | 0.19                  | 31.00                | -2.87 |
| DVNQDRLTQR | AIEASNAYS           | LAMA5_HUMAN |             |      | Laminin subunit alpha-5;                  | 3.65                            | 0.20                  | 25.10                | -5.13 |
| AYTPGHVHR  | GQLQLVEGNFR         | LAMA5_HUMAN |             |      | Laminin subunit alpha-5;                  | 3.46                            | 0.21                  | 43.90                | -1.40 |
| GGRCDPHTGR | CNCPPGLSGER         | LAMA5_HUMAN |             |      | Laminin subunit alpha-5;                  | 3.25                            | 0.15                  | 42.00                | -5.10 |
| TLQATLHAAR | DTLASVFR            | LAMA5_HUMAN |             |      | Laminin subunit alpha-5;                  | 2.62                            | 0.22                  | 34.30                | -2.77 |

Table S5

| Non-prime  | Prime                | Id 1        | Id 2 | Id 3 | Protein (Id1)            | Fold-change (log <sub>2</sub> ) | Fc standard deviation | X! Tandem hyperscore | ppm   |
|------------|----------------------|-------------|------|------|--------------------------|---------------------------------|-----------------------|----------------------|-------|
| DAANPKGCTR | CFCFGATER            | LAMA5_HUMAN |      |      | Laminin subunit alpha-5; | 2.46                            | 0.14                  | 33.80                | -4.93 |
| VVLLDDLER  | AGALLPAIHEQLR        | LAMA5_HUMAN |      |      | Laminin subunit alpha-5; | 2.23                            | 0.16                  | 38.40                | -0.85 |
| LDQAKEELER | LAASLDGAR            | LAMA5_HUMAN |      |      | Laminin subunit alpha-5; | 2.22                            | 0.06                  | 29.80                | -1.77 |
| LPEGCDEAGR | CLCQPEFAGPHCDR       | LAMA5_HUMAN |      |      | Laminin subunit alpha-5; | 2.12                            | 0.13                  | 31.10                | -2.31 |
| DPDTGQCRCR | VGFEATCDR            | LAMA5_HUMAN |      |      | Laminin subunit alpha-5; | 1.69                            | 0.13                  | 26.80                | 2.46  |
| GTEATLGHAK | TLLAAIR              | LAMA5_HUMAN |      |      | Laminin subunit alpha-5; | 0.80                            | 0.05                  | 33.90                | -3.18 |
| GGPVGHSIHC | EVCDHCVVLLDDLER      | LAMA5_HUMAN |      |      | Laminin subunit alpha-5; | 0.65                            | 0.03                  | 41.50                | -0.15 |
| SIHCEVCDHC | VVLLDDLER            | LAMA5_HUMAN |      |      | Laminin subunit alpha-5; | 0.57                            | 0.05                  | 43.50                | -1.39 |
| KCRPNVTGRR | CDTCSPGFHGYPR        | LAMA5_HUMAN |      |      | Laminin subunit alpha-5; | 0.44                            | 0.03                  | 37.00                | -3.79 |
| DYFGCRSCRC | DIGGALGQSCEPR        | LAMA5_HUMAN |      |      | Laminin subunit alpha-5; | 0.38                            | 0.02                  | 51.10                | -0.14 |
| HCEVCDHCVV | LLLDDLER             | LAMA5_HUMAN |      |      | Laminin subunit alpha-5; | 0.26                            | 0.02                  | 26.00                | -2.86 |
| TREQVLPAGQ | IVNCDCSAAGTQGNACR    | LAMA5_HUMAN |      |      | Laminin subunit alpha-5; | 0.11                            | 0.02                  | 68.10                | -1.54 |
| ETSKIAHAK  | AVAAEAQDTATR         | LAMA5_HUMAN |      |      | Laminin subunit alpha-5; | 0.00                            | 0.00                  | 64.30                | -0.32 |
| DKSYDFISHC | AAQGYHISPSSSLFCR     | LAMA5_HUMAN |      |      | Laminin subunit alpha-5; | -0.06                           | 0.00                  | 46.90                | -5.01 |
| RHETAQQLEV | LEQQSTSLGQDAR        | LAMA5_HUMAN |      |      | Laminin subunit alpha-5; | -0.08                           | 0.01                  | 46.20                | -2.66 |
| AQQLGQLALN | LSSIILDVNQDR         | LAMA5_HUMAN |      |      | Laminin subunit alpha-5; | -0.16                           | 0.01                  | 27.50                | 1.49  |
| RPGRIPTSSR | CGNTIPDDDNQVVSLSPGSR | LAMB1_HUMAN |      |      | Laminin subunit beta-1;  | 5.41                            | 0.79                  | 83.50                | 3.15  |
| KVDDIICDSR | YSDIEPSTEGEVIFR      | LAMB1_HUMAN |      |      | Laminin subunit beta-1;  | 2.93                            | 0.23                  | 54.90                | -4.57 |
| RVESLSQVEV | ILQHSAAADIAR         | LAMB1_HUMAN |      |      | Laminin subunit beta-1;  | 0.04                            | 0.00                  | 28.60                | -3.25 |
| TNLRIKFVKL | HTLGDNLLDSR          | LAMB1_HUMAN |      |      | Laminin subunit beta-1;  | 0.02                            | 0.00                  | 24.70                | -7.92 |
| PGRIPTSSRC | GNTIPDDDNQVVSLSPGSR  | LAMB1_HUMAN |      |      | Laminin subunit beta-1;  | -0.02                           | 0.00                  | 41.40                | -3.64 |
| TSSRCGNTIP | DDDNQVVSLSPGSR       | LAMB1_HUMAN |      |      | Laminin subunit beta-1;  | -0.20                           | 0.02                  | 37.20                | 0.07  |

Table S5

| Non-prime   | Prime              | Id 1        | Id 2 | Id 3 | Protein (Id1)            | Fold-change (log <sub>2</sub> ) | Fc standard deviation | X! Tandem hyperscore | ppm   |
|-------------|--------------------|-------------|------|------|--------------------------|---------------------------------|-----------------------|----------------------|-------|
| PGYYFATLDH  | YLYEAEENLPGVSIVER  | LAMB1_HUMAN |      |      | Laminin subunit beta-1;  | -1.08                           | 0.07                  | 34.50                | 1.82  |
| LAGAIAERVR  | SLADVDAILAR        | LAMB2_HUMAN |      |      | Laminin subunit beta-2;  | 3.84                            | 0.35                  | 58.40                | -5.80 |
| AIRGAVADTR  | DTEQTLYQVQER       | LAMB2_HUMAN |      |      | Laminin subunit beta-2;  | 3.66                            | 0.48                  | 51.30                | -2.60 |
| VCGAPGDAPC  | ATSPCGGAGCRDEDGQPR | LAMB2_HUMAN |      |      | Laminin subunit beta-2;  | 2.34                            | 0.12                  | 21.90                | -0.21 |
| ARHTQAEQR   | ALAEGGSILSR        | LAMB2_HUMAN |      |      | Laminin subunit beta-2;  | 2.15                            | 0.13                  | 41.40                | -5.26 |
| SLRRTLQGLQ  | LDLPLEEETLSLPR     | LAMB3_HUMAN |      |      | Laminin subunit beta-3;  | -2.16                           | 0.10                  | 33.80                | -0.48 |
| GSTNGQCDIR  | TGQCECQPGITGQH CER | LAMC1_HUMAN |      |      | Laminin subunit gamma-1; | 7.28                            | 1.14                  | 63.10                | -1.51 |
| NCPTGTTGKR  | CELCDGDFYFGDPLGR   | LAMC1_HUMAN |      |      | Laminin subunit gamma-1; | 7.02                            | 1.37                  | 62.50                | -0.28 |
| SFRVDRRDTR  | LSAEDLVLEGAGLR     | LAMC1_HUMAN |      |      | Laminin subunit gamma-1; | 4.48                            | 0.61                  | 72.00                | -2.79 |
| GRNGPVRLCR  | LCQCSNIDPNAVGN CNR | LAMC1_HUMAN |      |      | Laminin subunit gamma-1; | 4.45                            | 0.60                  | 49.50                | -2.57 |
| NLQSGQG CER | CDCHALGSTNGQCDIR   | LAMC1_HUMAN |      |      | Laminin subunit gamma-1; | 3.52                            | 0.39                  | 71.00                | 2.48  |
| IDECNIETGR  | CVCKDNVEGFNCER     | LAMC1_HUMAN |      |      | Laminin subunit gamma-1; | 3.39                            | 0.36                  | 35.20                | -1.79 |
| ECLPCDCNGR  | SQECYFDPELYR       | LAMC1_HUMAN |      |      | Laminin subunit gamma-1; | 2.85                            | 0.17                  | 54.60                | -3.55 |
| SRLQIRNTI   | EETGNLAEQAR        | LAMC1_HUMAN |      |      | Laminin subunit gamma-1; | 2.85                            | 0.15                  | 30.20                | -1.52 |
| EASLEWSSER  | QDIAVISDSYFPR      | LAMC1_HUMAN |      |      | Laminin subunit gamma-1; | 2.04                            | 0.08                  | 48.60                | -3.70 |

Table S5

| Non-prime   | Prime                  | Id 1        | Id 2 | Id 3 | Protein (Id1)                                             | Fold-change (log <sub>2</sub> ) | Fc standard deviation | X! Tandem hyperscore | ppm   |
|-------------|------------------------|-------------|------|------|-----------------------------------------------------------|---------------------------------|-----------------------|----------------------|-------|
| ISRLQNI RNT | IEETGNLAEQAR           | LAMC1_HUMAN |      |      | Laminin subunit gamma-1;                                  | 1.25                            | 0.11                  | 30.70                | -2.56 |
| RVAKTANDTS  | TEAYNLLLR              | LAMC1_HUMAN |      |      | Laminin subunit gamma-1;                                  | 1.19                            | 0.05                  | 26.20                | -4.61 |
| LLLRTL AGEN | QTAFEIEELNR            | LAMC1_HUMAN |      |      | Laminin subunit gamma-1;                                  | 1.11                            | 0.09                  | 52.00                | 3.32  |
| AAAAAGCAQA  | AMDECTDEGGRPQR         | LAMC1_HUMAN |      |      | Laminin subunit gamma-1;                                  | 0.79                            | 0.06                  | 36.40                | -0.54 |
| SSQISRLQNI  | RNTIEETGNLAEQAR        | LAMC1_HUMAN |      |      | Laminin subunit gamma-1;                                  | 0.51                            | 0.04                  | 52.70                | 0.52  |
| CNIETGRVCV  | KDNVEGFNCER            | LAMC1_HUMAN |      |      | Laminin subunit gamma-1;                                  | 0.34                            | 0.01                  | 35.30                | 0.21  |
| VAKTANDTST  | EAYNLLLR               | LAMC1_HUMAN |      |      | Laminin subunit gamma-1;                                  | 0.26                            | 0.02                  | 26.30                | -2.84 |
| DIVRVAKTAN  | DTSTEAYNLLLR           | LAMC1_HUMAN |      |      | Laminin subunit gamma-1;                                  | -0.06                           | 0.01                  | 59.70                | -1.26 |
| VRVAKTANDT  | STEAYNLLLR             | LAMC1_HUMAN |      |      | Laminin subunit gamma-1;                                  | -1.55                           | 0.05                  | 39.70                | -0.33 |
| ASDKTQQAER  | ALGSAAADAQR            | LAMC2_HUMAN |      |      | Laminin subunit gamma-                                    | 3.87                            | 0.21                  | 40.70                | -1.60 |
| AEQALQDILR  | DAQISEGASR             | LAMC2_HUMAN |      |      | Laminin subunit gamma-2;                                  | 2.96                            | 0.20                  | 42.20                | -1.88 |
| RRVQPPAQTR  | RSTPLGQQQPAPR          | LTBP2_HUMAN |      |      | Latent-transforming growth factor beta-binding protein 2; | 0.13                            | 0.02                  | 39.90                | -1.36 |
| RVQPPAQTRR  | STPLGQQQPAPR           | LTBP2_HUMAN |      |      | Latent-transforming                                       | 0.02                            | 0.00                  | 48.60                | -1.60 |
| SDECRCVSGR  | CVPRPGGAVCECPGGFQLDASR | LTBP3_HUMAN |      |      | Latent-transforming growth factor beta-                   | 2.77                            | 0.21                  | 49.00                | 0.45  |
| SNGYYYHTQR  | LECIDNDECADEEPACEGGR   | LTBP4_HUMAN |      |      | Latent-transforming growth factor beta-                   | 6.72                            | 1.46                  | 51.30                | 0.72  |
| RQGPVGSRR   | ECYFDTAAPDACDNILAR     | LTBP4_HUMAN |      |      | Latent-transforming growth factor beta-                   | 4.07                            | 0.64                  | 67.20                | -3.47 |

Table S5

| Non-prime  | Prime                    | Id 1        | Id 2 | Id 3 | Protein (Id1)                                       | Fold-change (log <sub>2</sub> ) | Fc standard deviation | X! Tandem hyperscore | ppm   |
|------------|--------------------------|-------------|------|------|-----------------------------------------------------|---------------------------------|-----------------------|----------------------|-------|
| FHCACPAGFR | SRGPGAPCQDVDECAR         | LTBP4_HUMAN |      |      | Latent-transforming growth factor beta-             | 3.63                            | 0.37                  | 48.20                | -2.38 |
| AVARAEAAAR | AEAAAAPYTVLAQSAPR        | LTBP4_HUMAN |      |      | Latent-transforming growth factor beta-             | 2.06                            | 0.11                  | 39.00                | 3.40  |
| APSGDLSLRR | DVDECQLFR                | LTBP4_HUMAN |      |      | Latent-transforming growth factor beta-             | 1.68                            | 0.09                  | 43.90                | -0.17 |
| LLLLPPPGSC | AAEGSPGTPDESTPPPR        | MESD_HUMAN  |      |      | LDLR chaperone MESD;                                | 0.52                            | 0.02                  | 60.60                | 0.47  |
| VLPLASPGAA | LTGEQLLGSLLR             | LFTY1_HUMAN |      |      | Left-right determination factor 1;                  | 1.33                            | 0.19                  | 39.10                | -1.58 |
| ASLVTAKLVN | TTITPEPEPKPQNSR          | LUZP1_HUMAN |      |      | Leucine zipper protein 1;                           | 1.51                            | 0.14                  | 35.30                | -1.95 |
| KGSRNMPGLS | AATLASLGGTSSR            | LRRF1_HUMAN |      |      | Leucine-rich repeat flightless-interacting          | 0.28                            | 0.02                  | 63.20                | -2.29 |
| VSQEAAQVLE | SAGEGPLDVR               | LRRF2_HUMAN |      |      | Leucine-rich repeat flightless-interacting          | 0.83                            | 0.03                  | 33.60                | -1.06 |
| LLPALTVLDI | HDNQLTSLPSAIR            | LRC40_HUMAN |      |      | Leucine-rich repeat-containing protein 40;          | -4.68                           | 0.00                  | 32.30                | -3.90 |
| LIVQWPNQDS | LQAVVDGLEAFSAHR          | PRAML_HUMAN |      |      | Leucine-rich repeat-Leukotriene A-4                 | 1.58                            | 0.11                  | 30.70                | -0.79 |
| ELVALMSAIR | DGETPDPEDPSR             | LKHA4_HUMAN |      |      | hydrolase;                                          | 2.16                            | 0.07                  | 36.30                | -0.74 |
| HIPTSAPVYQ | QPQQPVVAQSYGGYKEPAAPVSIQ | LASP1_HUMAN |      |      | LIM and SH3 domain protein 1;                       | 1.34                            | 0.15                  | 31.90                | -0.50 |
| AAPSSGQIYG | SGPQGYNTQPVPVSGQCPPSTR   | LPP_HUMAN   |      |      | Lipoma-preferred partner;                           | 0.53                            | 0.03                  | 36.40                | -2.41 |
| ITPAAFSTLT | TASVEESESTSSAR           | LRBA_HUMAN  |      |      | Lipopolysaccharide-responsive and beige-like        | 0.26                            | 0.01                  | 48.30                | -1.22 |
| LFVCLGNICR | SPIAEAVFR                | PPAC_HUMAN  |      |      | Low molecular weight phosphotyrosine protein        | 3.24                            | 0.16                  | 41.50                | -6.19 |
| WWKCDGQKDC | SDGSDELALCPQR            | LRP2_HUMAN  |      |      | Low-density lipoprotein receptor-related protein 2; | 3.35                            | 0.31                  | 23.10                | -7.65 |
| CLHQRRVALA | ELQEADGQCPVDR            | PPA6_HUMAN  |      |      | Lysophosphatidic acid phosphatase type 6;           | 0.00                            | 0.00                  | 51.00                | 4.19  |

Table S5

| Non-prime   | Prime                    | Id 1        | Id 2 | Id 3 | Protein (Id1)                           | Fold-change (log <sub>2</sub> ) | Fc standard deviation | X! Tandem hyperscore | ppm   |
|-------------|--------------------------|-------------|------|------|-----------------------------------------|---------------------------------|-----------------------|----------------------|-------|
| SLATAALLGH  | ILLHDFLLVPR              | LYAG_HUMAN  |      |      | Lysosomal alpha-glucosidase;            | 2.01                            | 0.05                  | 43.20                | 0.95  |
| ATAALLGHIL  | LHDFLLVPR                | LYAG_HUMAN  |      |      | Lysosomal alpha-glucosidase;            | 1.14                            | 0.05                  | 30.80                | -1.14 |
| AQAHPGRPRA  | VPTQCDVPPNSR             | LYAG_HUMAN  |      |      | Lysosomal alpha-                        | -0.20                           | 0.01                  | 23.50                | 0.64  |
| APQIPRRSW   | SPALTIENEHIR             | MA2B1_HUMAN |      |      | Lysosomal alpha-mannosidase;            | -0.34                           | 0.03                  | 33.40                | -1.20 |
| LVSASRGEA   | APDQDEIQR                | PPGB_HUMAN  |      |      | Lysosomal protective protein;           | 0.96                            | 0.02                  | 22.50                | -1.27 |
| SWASRGEAAP  | DQDEIQRPLGLAKQPSFR       | PPGB_HUMAN  |      |      | Lysosomal protective protein;           | 0.81                            | 0.04                  | 33.30                | -0.69 |
| GNEKSIIDCK  | FNAESQGCNHEEDAGVR        | LOXL2_HUMAN |      |      | Lysyl oxidase homolog 2;                | 4.06                            | 0.54                  | 36.80                | -1.85 |
| SPDGPSRFRK  | AYKPEQPLVR               | LOXL2_HUMAN |      |      | Lysyl oxidase homolog 2;                | -1.00                           | 0.06                  | 22.40                | -1.65 |
| SEVRCRGRYER | TLSDCPALEGSQNGCQHENDAAVF | LOXL4_HUMAN |      |      | Lysyl oxidase homolog 4;                | 4.30                            | 0.68                  | 43.60                | 6.32  |
| SAREALFGAR  | LGQGLGPIHLSEVR           | LOXL4_HUMAN |      |      | Lysyl oxidase homolog 4;                | 1.33                            | 0.04                  | 38.80                | -3.25 |
| RPPKTKPQRK  | GSWAEPR                  | LOXL4_HUMAN |      |      | Lysyl oxidase homolog 4;                | 0.55                            | 0.09                  | 26.50                | -5.38 |
| KHKAEVEDE   | TVELDVSDEEMAR            | MPH6_HUMAN  |      |      | M-phase phosphoprotein 6;               | 0.29                            | 0.02                  | 31.60                | -6.04 |
| EGRRSTRDRR  | SPAPEGGPASEGAARPLPR      | CSF1_HUMAN  |      |      | Macrophage colony-stimulating factor 1; | 0.84                            | 0.04                  | 27.00                | -1.77 |
| GGAQNRYSK   | LLCGLLAER                | MIF_HUMAN   |      |      | Macrophage migration inhibitory factor; | 6.37                            | 1.02                  | 40.40                | -0.37 |
| IGKIGGAQNR  | SYSKLLCGLLAER            | MIF_HUMAN   |      |      | Macrophage migration                    | 3.17                            | 0.07                  | 46.10                | -0.51 |
| MP          | MFIVNTNVPR               | MIF_HUMAN   |      |      | Macrophage migration inhibitory factor; | 0.09                            | 0.00                  | 37.10                | -1.80 |
| YMLGSAMSRP  | IIHFGSDYEDR              | PRIO_HUMAN  |      |      | Major prion protein;                    | -0.52                           | 0.03                  | 36.10                | -2.16 |
| EQLPDCLKGC  | DVVVIPAGVPR              | MDHM_HUMAN  |      |      | Malate dehydrogenase, mitochondrial;    | -1.49                           | 0.13                  | 27.40                | 0.87  |



Table S5

| Non-prime  | Prime                  | Id 1        | Id 2 | Id 3 | Protein (Id1)                                          | Fold-change (log <sub>2</sub> ) | Fc standard deviation | X! Tandem hyperscore | ppm   |
|------------|------------------------|-------------|------|------|--------------------------------------------------------|---------------------------------|-----------------------|----------------------|-------|
| CGLCSLGAVG | APRPCAPQQWEGR          | EPDR1_HUMAN |      |      | Mammalian ependymin-related protein 1;                 | 1.60                            | 0.14                  | 22.90                | -0.82 |
| SCSNFAVQHR | YLFEEDNLLR             | MATN2_HUMAN |      |      | Matrilin-2;                                            | -1.55                           | 0.09                  | 36.30                | -1.04 |
| SASTSSHNLQ | SIFNIGSR               | MATR3_HUMAN |      |      | Matrin-3;                                              | -0.04                           | 0.00                  | 30.30                | -1.72 |
| PNKDTSENAD | GQSDENKDDYTIPDEYR      | MATR3_HUMAN |      |      | Matrin-3;                                              | -0.18                           | 0.01                  | 51.00                | -2.46 |
| LGCLGLGVAA | EDAEVHAENWLR           | MMP15_HUMAN |      |      | Matrix metalloproteinase-15;                           | 0.76                            | 0.08                  | 30.20                | -5.27 |
| LLGCLGLGVA | AEDAEVHAENWLR          | MMP15_HUMAN |      |      | Matrix metalloproteinase-15;                           | 0.23                            | 0.01                  | 36.10                | 0.13  |
| HRRDQIEKD  | AALCVLIDEMNER          | MED7_HUMAN  |      |      | Mediator of RNA polymerase II transcription subunit 7; | -0.69                           | 0.01                  | 26.60                | -2.88 |
| PPPLPRLKRR | DFTPAELR               | PGRC1_HUMAN |      |      | Membrane-associated progesterone receptor              | 0.86                            | 0.03                  | 30.60                | -2.76 |
| IFLLYKIVRG | DQPAASGSDDEPPPLPR      | PGRC1_HUMAN |      |      | Membrane-associated progesterone receptor component 1; | 0.80                            | 0.02                  | 86.30                | -2.04 |
| ALSVLPGSRA | LRPGDCEVCISYLGR        | MANF_HUMAN  |      |      | Mesencephalic astrocyte-derived neurotrophic factor;   | 0.52                            | 0.03                  | 72.10                | -0.77 |
| EPGLQTTAVV | SMGSGDHQFNLAEILSQNYSVR | MIER2_HUMAN |      |      | Mesoderm induction early response protein 2;           | -5.27                           | 0.00                  | 48.30                | 7.63  |
| AESAEVLLPR | LVSCPGPLDQDQQAAR       | MSLN_HUMAN  |      |      | Mesothelin;                                            | 10.36                           | 0.00                  | 95.20                | 0.52  |
| PPNISSLSPR | QLLGFPCAEVSGLSTER      | MSLN_HUMAN  |      |      | Mesothelin;                                            | 6.01                            | 0.87                  | 77.50                | 1.64  |
| PQACTRFFSR | ITKANVDLLPR            | MSLN_HUMAN  |      |      | Mesothelin;                                            | 5.89                            | 0.44                  | 30.00                | -3.39 |
| LPRGAPERQR | LLPAALACWGVR           | MSLN_HUMAN  |      |      | Mesothelin;                                            | 4.81                            | 0.30                  | 56.10                | -2.66 |
| LPVLGQPIIR | SIPQGIVAAWR            | MSLN_HUMAN  |      |      | Mesothelin;                                            | 3.97                            | 0.44                  | 22.70                | -3.83 |
| GSLLEADVR  | ALGGLACDLPR            | MSLN_HUMAN  |      |      | Mesothelin;                                            | 3.81                            | 0.33                  | 48.60                | 4.48  |
| PQDLDTCDPR | QLDVLYPKAR             | MSLN_HUMAN  |      |      | Mesothelin;                                            | 2.86                            | 0.26                  | 30.40                | -4.28 |

Table S5

| Non-prime  | Prime                | Id 1        | Id 2 | Id 3 | Protein (Id1)                      | Fold-change (log <sub>2</sub> ) | Fc standard deviation | X! Tandem hyperscore | ppm   |
|------------|----------------------|-------------|------|------|------------------------------------|---------------------------------|-----------------------|----------------------|-------|
| WSVSTMDALR | GLLPVLGQPIIR         | MSLN_HUMAN  |      |      | Mesothelin;                        | 2.78                            | 0.17                  | 39.50                | -4.60 |
| PAALACWGVR | GSSLSEADV R          | MSLN_HUMAN  |      |      | Mesothelin;                        | 1.67                            | 0.11                  | 40.60                | 0.09  |
| CTRFSSRITK | ANVDLLPR             | MSLN_HUMAN  |      |      | Mesothelin;                        | 1.46                            | 0.04                  | 34.60                | -3.24 |
| GGLACDLPGR | FVAESAEVLLPR         | MSLN_HUMAN  |      |      | Mesothelin;                        | 1.41                            | 0.07                  | 56.40                | -3.82 |
| SAEVLLPRLV | SCPGPLDQDQQAAR       | MSLN_HUMAN  |      |      | Mesothelin;                        | 1.06                            | 0.10                  | 52.80                | -0.35 |
| NFSTAIPDFH | AVLAGPGGPGNGLR       | GRM1_HUMAN  |      |      | Metabotropic glutamate             | 0.51                            | 0.02                  | 25.10                | -1.74 |
| QSRHLACLPR | EPGLCTWQSLR          | TIMP1_HUMAN |      |      | Metalloproteinase                  | 5.65                            | 0.25                  | 33.50                | -1.38 |
| YQRYEIKMTK | MYKGFQALGDAADIR      | TIMP1_HUMAN |      |      | Metalloproteinase                  | 1.57                            | 0.07                  | 46.40                | -2.04 |
| YEIKMTKMYK | GFQALGDAADIR         | TIMP1_HUMAN |      |      | Metalloproteinase                  | 1.18                            | 0.12                  | 63.90                | -2.05 |
| LLWLIAPSRA | CTCVPPHPQTAFCSNDLVIR | TIMP1_HUMAN |      |      | Metalloproteinase                  | 1.10                            | 0.05                  | 62.00                | -0.96 |
| QALGDAADIR | FVYTPAMESVCGYFHR     | TIMP1_HUMAN |      |      | Metalloproteinase inhibitor 1;     | 1.03                            | 0.04                  | 53.30                | 1.45  |
| QAKFFACIKR | SDGSCAWYR            | TIMP2_HUMAN |      |      | Metalloproteinase inhibitor 2;     | 6.51                            | 0.38                  | 39.90                | -1.42 |
| LATLLRPADA | CSCSPVHPQQAFCNADVIR  | TIMP2_HUMAN |      |      | Metalloproteinase inhibitor 2;     | 1.07                            | 0.06                  | 70.50                | -2.23 |
| LLRPADACSC | SPVHPQQAFCNADVIR     | TIMP2_HUMAN |      |      | Metalloproteinase                  | 0.79                            | 0.06                  | 78.00                | -2.08 |
| ATLLRPADAC | SCSPVHPQQAFCNADVIR   | TIMP2_HUMAN |      |      | Metalloproteinase                  | 0.60                            | 0.05                  | 60.20                | -2.57 |
| LEGMLSQSVS | SQYNMAGVR            | ICLN_HUMAN  |      |      | Methylosome subunit pICln;         | 1.31                            | 0.08                  | 30.00                | -1.51 |
| ATEPEPSGSI | ANPAASTSPSLSHR       | MAP1B_HUMAN |      |      | Microtubule-associated protein 1B; | 2.20                            | 0.23                  | 26.70                | 0.21  |
| VSPCEFEHRK | AVPMAPAPASPGSSNDSSAR | MAP1S_HUMAN |      |      | Microtubule-associated protein 1S; | 0.29                            | 0.02                  | 39.70                | 1.05  |
| SSMKKTTTLS | GTAPAAGVVPSR         | MAP4_HUMAN  |      |      | Microtubule-associated             | 0.38                            | 0.01                  | 42.10                | -1.61 |
| SMKKTTTLSG | TAPAAGVVPSR          | MAP4_HUMAN  |      |      | Microtubule-associated protein 4;  | -0.04                           | 0.00                  | 52.50                | -5.03 |
| VRQGTLKKAR | YNAQCQETIR           | MK_HUMAN    |      |      | Midkine;                           | 0.51                            | 0.05                  | 43.50                | -0.46 |

Table S5

| Non-prime  | Prime                    | Id 1        | Id 2 | Id 3 | Protein (Id1)                                    | Fold-change (log <sub>2</sub> ) | Fc standard deviation | X! Tandem hyperscore | ppm   |
|------------|--------------------------|-------------|------|------|--------------------------------------------------|---------------------------------|-----------------------|----------------------|-------|
| TKVRQGTLLK | ARYNAQCQETIR             | MK_HUMAN    |      |      | Midkine;                                         | 0.06                            | 0.01                  | 46.70                | 0.84  |
| EESLKTDPHE | IGEGKPTPALSEEASSSSIR     | IMMT_HUMAN  |      |      | Mitochondrial inner                              | 0.55                            | 0.04                  | 50.60                | -2.11 |
| SLYFGENRLR | STQAATQVVLNVPETR         | MPPB_HUMAN  |      |      | Mitochondrial-processing peptidase subunit beta; | -0.02                           | 0.00                  | 63.00                | 4.92  |
| VLMDGSVKLV | TPEGSPVR                 | M4K1_HUMAN  |      |      | Mitogen-activated protein kinase kinase kinase   | 3.09                            | 0.40                  | 26.30                | -2.07 |
|            | MVGGGGVGGGLENANPLIYQR    | MIP18_HUMAN |      |      | Mitotic spindle-associated MMXD complex subunit  | 0.24                            | 0.01                  | 49.00                | -0.92 |
| VFKQPISCVK | EEIQETQTPTHSR            | MK67I_HUMAN |      |      | MKI67 FHA domain-interacting nucleolar           | 0.40                            | 0.02                  | 28.10                | -6.53 |
| ELKTAMSTPH | VAEPAENEQDEQDENGAEASADLI | MOES_HUMAN  |      |      | Moesin;                                          | 5.69                            | 0.79                  | 61.00                | 0.73  |
| LEKTRAEKLT | AMSTPHVAEPAENEQDEQDENGAI | MOES_HUMAN  |      |      | Moesin;                                          | 4.62                            | 0.83                  | 42.00                | -0.12 |
| KTRAEKLTAM | STPHVAEPAENEQDEQDENGAEAS | MOES_HUMAN  |      |      | Moesin;                                          | 3.67                            | 0.34                  | 75.20                | 0.59  |
| SEAEKLAKER | QEAEAKEALLQASR           | MOES_HUMAN  |      |      | Moesin;                                          | 1.57                            | 0.11                  | 30.10                | -3.87 |
| EAVEWQKAQ  | MVQEDLEKTR               | MOES_HUMAN  |      |      | Moesin;                                          | 1.55                            | 0.11                  | 23.20                | -2.14 |
| LLLPLVHSA  | TTPEPCELDEDFR            | CD14_HUMAN  |      |      | Monocyte differentiation                         | 1.26                            | 0.07                  | 58.80                | -1.14 |
| KIPEELKPWL | VDDWDLITR                | MO4L1_HUMAN |      |      | Mortality factor 4-like protein 1;               | 1.16                            | 0.08                  | 32.20                | -0.86 |
| IPEELKPWL  | DDWDLITR                 | MO4L1_HUMAN |      |      | Mortality factor 4-like                          | 0.49                            | 0.03                  | 31.10                | -2.71 |
| IPEELKPWL  | EDWDLVTR                 | MO4L2_HUMAN |      |      | Mortality factor 4-like protein 2;               | 0.98                            | 0.05                  | 32.80                | -2.26 |
| CESPRSVECR | AEDAPGVPLR               | MUC5A_HUMAN |      |      | Mucin-5AC;                                       | 2.58                            | 0.30                  | 37.00                | -1.14 |
| CSPDVGLTCR | NREQASGLCYNYQIR          | MUC5A_HUMAN |      |      | Mucin-5AC;                                       | 2.09                            | 0.17                  | 35.80                | -1.26 |
| DDEAPDAETT | AAATTATTAAPTATTAASTTAR   | MUCL1_HUMAN |      |      | Mucin-like protein 1;                            | -3.25                           | 0.31                  | 31.30                | 0.05  |
| ELLDSPGKVL | LQSKDQITAGNAAR           | PUR6_HUMAN  |      |      | Multifunctional protein                          | 2.76                            | 0.26                  | 35.20                | -3.27 |

Table S5

| Non-prime  | Prime                 | Id 1        | Id 2 | Id 3 | Protein (Id1)                               | Fold-change (log <sub>2</sub> ) | Fc standard deviation | X! Tandem hyperscore | ppm   |
|------------|-----------------------|-------------|------|------|---------------------------------------------|---------------------------------|-----------------------|----------------------|-------|
| RLMQGDQILM | VNGEDVR               | MPDZ_HUMAN  |      |      | Multiple PDZ domain protein;                | 3.39                            | 0.06                  | 21.00                | -1.59 |
| PMLQTVAKNK | DQGTIEDYVEGLR         | MYL6_HUMAN  |      |      | Myosin light polypeptide                    | 0.04                            | 0.00                  | 59.60                | -3.17 |
| FTEDQTAEFK | EAFQLFDR              | MYL6_HUMAN  |      |      | Myosin light polypeptide                    | -1.86                           | 0.14                  | 24.70                | -1.98 |
| MERELEKSQR | SQISSVNSDVEALRR       | MPRIP_HUMAN |      |      | Myosin phosphatase Rho-                     | -0.42                           | 0.03                  | 28.80                | -1.41 |
| PSAEKVPTTK | STLWQEEMR             | MPRIP_HUMAN |      |      | Myosin phosphatase Rho-interacting protein; | -0.44                           | 0.02                  | 39.90                | -1.49 |
| VRAMEAEAAG | LREQLLEEEAAAR         | MYH14_HUMAN |      |      | Myosin-14;                                  | 1.55                            | 0.14                  | 36.70                | -0.83 |
| KGNLRVKQLK | RQLEEAEEEEASR         | MYH14_HUMAN |      |      | Myosin-14;                                  | 0.68                            | 0.04                  | 33.50                | 2.44  |
| LEEKRRLEAR | IAQLEEELEEEQGNTELINDR | MYH9_HUMAN  |      |      | Myosin-9;                                   | 2.89                            | 0.28                  | 55.90                | -0.16 |
| QKNMALKKIR | ELESQISELQEDLESER     | MYH9_HUMAN  |      |      | Myosin-9;                                   | 2.77                            | 0.27                  | 67.50                | -3.10 |
| YDKLEKTKTR | LQQELDDLLVLDLHDHQR    | MYH9_HUMAN  |      |      | Myosin-9;                                   | 2.31                            | 0.13                  | 65.00                | -2.07 |
| FSALESQLQD | TQELLQEENR            | MYH9_HUMAN  |      |      | Myosin-9;                                   | 2.22                            | 0.14                  | 29.90                | -2.41 |
| ANASRRKLQR | ELEDATETADAMNR        | MYH9_HUMAN  |      |      | Myosin-9;                                   | 1.53                            | 0.18                  | 49.50                | -0.82 |
| EKLQLQEQLQ | AETELCAEAELR          | MYH9_HUMAN  |      |      | Myosin-9;                                   | 0.88                            | 0.10                  | 76.50                | -3.29 |
| KTKTRLQDEL | DDLLVLDLHDHQR         | MYH9_HUMAN  |      |      | Myosin-9;                                   | 0.73                            | 0.06                  | 45.90                | -0.80 |
| KKKMQQNIQE | LEEQLLEEEESAR         | MYH9_HUMAN  |      |      | Myosin-9;                                   | 0.69                            | 0.05                  | 50.70                | -1.34 |
| QVRRTEKCLK | DVLLQVDDERR           | MYH9_HUMAN  |      |      | Myosin-9;                                   | 0.67                            | 0.06                  | 29.00                | -0.29 |
| EKTKTRLQDE | LDDLLVLDLHDHQR        | MYH9_HUMAN  |      |      | Myosin-9;                                   | 0.53                            | 0.04                  | 45.40                | -2.50 |
| KLEKTKTRLQ | QELDDLLVLDLHDHQR      | MYH9_HUMAN  |      |      | Myosin-9;                                   | 0.48                            | 0.03                  | 57.50                | 1.32  |
| DFSALESQLQ | DTQELLQEENR           | MYH9_HUMAN  |      |      | Myosin-9;                                   | 0.31                            | 0.02                  | 47.00                | -4.56 |
| KASTRLKQLK | RQLEEAEEEEAQR         | MYH9_HUMAN  |      |      | Myosin-9;                                   | 0.29                            | 0.03                  | 50.40                | -5.65 |

Table S5

| Non-prime  | Prime                   | Id 1        | Id 2 | Id 3 | Protein (Id1)                                                       | Fold-change (log <sub>2</sub> ) | Fc standard deviation | X! Tandem hyperscore | ppm   |
|------------|-------------------------|-------------|------|------|---------------------------------------------------------------------|---------------------------------|-----------------------|----------------------|-------|
| DKLEKTKTRL | QQELDDLLVLDLHQQR        | MYH9_HUMAN  |      |      | Myosin-9;                                                           | 0.20                            | 0.01                  | 35.10                | 2.14  |
| EVSSLKNKLR | RGDLPFVVPR              | MYH9_HUMAN  |      |      | Myosin-9;                                                           | -0.34                           | 0.03                  | 29.00                | -2.10 |
| LEKTKTRLQQ | ELDDLLVLDLHQQR          | MYH9_HUMAN  |      |      | Myosin-9;                                                           | -0.49                           | 0.03                  | 41.70                | -2.85 |
| LFGLWEASG  | GLDSGASRDDDLLLLPYPR     | NAGPA_HUMAN |      |      | N-acetylglucosamine-1-phosphodiester alpha-N-acetylglucosaminidase; | 0.76                            | 0.05                  | 54.50                | -2.56 |
| LRGASNLTWR | SDVLVEYQGEGR            | GNS_HUMAN   |      |      | N-acetylglucosamine-6-sulfatase;                                    | 0.06                            | 0.00                  | 40.70                | -4.20 |
| SVDQVKAQLR | TALASGGVLDASGDYR        | B3GN1_HUMAN |      |      | N-acetyllactosaminide                                               | 4.85                            | 0.39                  | 68.00                | -4.55 |
| REPGEFALLR | SCQEVFDKLAR             | B3GN1_HUMAN |      |      | N-acetyllactosaminide beta-1,3-N-                                   | 1.53                            | 0.19                  | 37.20                | -2.13 |
| KHKKEVGKLR | SMDLSEYIIR              | NAT10_HUMAN |      |      | N-acetyltransferase 10;                                             | -0.16                           | 0.01                  | 44.50                | -2.93 |
| DSPIPGAGAY | ADDTAGAAAATGNGDILMR     | ASPG_HUMAN  |      |      | N(4)-(beta-N-acetylglucosaminyL)-L-asparaginase;                    | 3.99                            | 0.25                  | 33.00                | -3.46 |
| DKSKPGQFIR | SVDPDSPAEASGLR          | NHRF1_HUMAN |      |      | Na(+)/H(+) exchange regulatory cofactor NHE-                        | 2.93                            | 0.23                  | 45.10                | -1.82 |
| NGEIQKENS  | EALAEAALESPPALVR        | NHRF1_HUMAN |      |      | Na(+)/H(+) exchange regulatory cofactor NHE-                        | 2.81                            | 0.12                  | 28.70                | -5.05 |
| GVQVREELLR | AQEAPGQAEPAAAAEVQGAGNEN | NHRF1_HUMAN |      |      | Na(+)/H(+) exchange regulatory cofactor NHE-RF1;                    | 1.30                            | 0.06                  | 47.90                | 9.59  |
| IQKENSREAL | AEEAALESPPALVR          | NHRF1_HUMAN |      |      | Na(+)/H(+) exchange regulatory cofactor NHE-                        | 0.71                            | 0.04                  | 30.20                | -3.64 |
| LRAQEAPGQA | EPPAAAAEVQGAGNENEPR     | NHRF1_HUMAN |      |      | Na(+)/H(+) exchange                                                 | 0.66                            | 0.05                  | 112.20               | -0.97 |
| QKENSREALA | EAALESPPALVR            | NHRF1_HUMAN |      |      | Na(+)/H(+) exchange                                                 | 0.31                            | 0.02                  | 22.90                | -2.70 |
| QEAPGQAEP  | AAAEVQGAGNENEPR         | NHRF1_HUMAN |      |      | Na(+)/H(+) exchange regulatory cofactor NHE-                        | -0.37                           | 0.02                  | 85.40                | -0.06 |
| RNLHKTVMQN | GAGGALFVHR              | NDUV2_HUMAN |      |      | NADH dehydrogenase                                                  | -0.66                           | 0.03                  | 46.30                | 1.38  |
| ELLAEKMAVD | GGCGDTGDWEGR            | UBA3_HUMAN  |      |      | NEDD8-activating                                                    | -0.58                           | 0.03                  | 63.80                | -1.54 |
| IKNVNTALNT | TQIPSSIEDIFNDDR         | ULA1_HUMAN  |      |      | NEDD8-activating                                                    | 1.06                            | 0.10                  | 59.50                | -2.07 |

Table S5

| Non-prime  | Prime                  | Id 1        | Id 2 | Id 3 | Protein (Id1)                                 | Fold-change (log <sub>2</sub> ) | Fc standard deviation | X! Tandem hyperscore | ppm   |
|------------|------------------------|-------------|------|------|-----------------------------------------------|---------------------------------|-----------------------|----------------------|-------|
| FEQNVQRSMR | GGYIGSTYFER            | UBC12_HUMAN |      |      | NEDD8-conjugating enzyme Ubc12;               | -1.55                           | 0.09                  | 33.30                | -3.97 |
| QESSRRPQRK | SLYESFVSSDR            | NELFE_HUMAN |      |      | Negative elongation factor                    | -0.58                           | 0.03                  | 47.20                | -3.83 |
| LGRRAPGAAA | ARSGSAPQSPGASIR        | NEO1_HUMAN  |      |      | Neogenin;                                     | -1.93                           | 0.15                  | 36.50                | -0.68 |
| LGKGEYQESL | RSLEEEGQELPQSADVQR     | NEST_HUMAN  |      |      | Nestin;                                       | 1.53                            | 0.21                  | 56.60                | -1.24 |
| PSPTYTPILE | DAPGPQPQAEGSQEASWGVQGR | NEST_HUMAN  |      |      | Nestin;                                       | 1.52                            | 0.14                  | 62.30                | 0.44  |
| GEFLESDSVS | VSPWDDSLR              | NEST_HUMAN  |      |      | Nestin;                                       | 0.95                            | 0.07                  | 43.40                | 5.24  |
| FLQARTPTLA | STPIPTPQAPSPAVDAEIR    | NEST_HUMAN  |      |      | Nestin;                                       | 0.31                            | 0.01                  | 43.00                | -5.21 |
| PGLSMFAGQA | AQPDPDSDENGHPR         | NET1_HUMAN  |      |      | Netrin-1;                                     | 0.23                            | 0.01                  | 25.00                | -7.43 |
| STELDVVESR | AQLLVVGGSPGPVPR        | L1CAM_HUMAN |      |      | Neural cell adhesion                          | 6.49                            | 0.76                  | 42.80                | -3.88 |
| PSITWRGDGR | DLQELGSDSKYFIEDGR      | L1CAM_HUMAN |      |      | Neural cell adhesion molecule L1;             | 3.25                            | 0.35                  | 36.70                | -1.31 |
| DYSDQGNYSY | VASTELDVVESR           | L1CAM_HUMAN |      |      | Neural cell adhesion molecule L1;             | 1.43                            | 0.12                  | 44.20                | 3.00  |
| DVKGPQVALK | GSRVDIETPNLEGLTGPR     | AHNK_HUMAN  |      |      | Neuroblast differentiation-associated protein | 0.74                            | 0.04                  | 48.00                | -3.72 |
| WTREVFSSCS | SEVVLSGDDEEYQR         | AHNK_HUMAN  |      |      | Neuroblast differentiation-associated protein | 0.13                            | 0.01                  | 80.40                | 0.79  |
| YTTKIKPRLK | SEDGVEGDLGETQSR        | AHNK_HUMAN  |      |      | Neuroblast differentiation-associated protein | -0.25                           | 0.03                  | 59.60                | -2.92 |
| GGSEGGRRRR | ELDPMDVR               | NOTC1_HUMAN |      |      | Neurogenic locus notch homolog protein 1;     | 1.97                            | 0.13                  | 24.00                | -1.49 |
| QPCRAGGTCS | SDGMGFHCTCPPGVQGR      | NOTC3_HUMAN |      |      | Neurogenic locus notch                        | -1.34                           | 0.14                  | 21.10                | -1.21 |
| FALLAAGVAP | LSWDLPEPR              | NMB_HUMAN   |      |      | Neuromedin-B;                                 | 0.09                            | 0.01                  | 28.00                | -4.10 |
| ALLAAGVAPL | SWDLPEPR               | NMB_HUMAN   |      |      | Neuromedin-B;                                 | 0.00                            | 0.00                  | 25.80                | -4.08 |

Table S5

| Non-prime  | Prime                  | Id 1        | Id 2        | Id 3        | Protein (Id1)                                               | Fold-change (log <sub>2</sub> ) | Fc standard deviation | X! Tandem hyperscore | ppm   |
|------------|------------------------|-------------|-------------|-------------|-------------------------------------------------------------|---------------------------------|-----------------------|----------------------|-------|
| GARQRGLGGR | GLQEAAEER              | VEGF_HUMAN  |             |             | Neurosecretory protein                                      | 2.38                            | 0.11                  | 41.00                | -3.97 |
| GSAPEVRGAR | NSEPDQDEGELFQGVDPDR    | VEGF_HUMAN  |             |             | Neurosecretory protein VGF;                                 | 1.83                            | 0.11                  | 79.80                | -3.65 |
| GVAAPFPKAR | RPESALLGGSEAGER        | VEGF_HUMAN  |             |             | Neurosecretory protein                                      | 1.49                            | 0.10                  | 53.70                | -2.76 |
| PEASDPSEEL | EALASLLQELR            | VEGF_HUMAN  |             |             | Neurosecretory protein                                      | -1.04                           | 0.11                  | 48.50                | -1.02 |
| EAEAEERRLQ | EQEELNYIEHVLLR         | VEGF_HUMAN  |             |             | Neurosecretory protein VGF;                                 | -1.34                           | 0.10                  | 54.80                | -0.67 |
| ESPGPERVWR | ASWGEFQAR              | VEGF_HUMAN  |             |             | Neurosecretory protein                                      | -2.00                           | 0.16                  | 31.10                | -3.41 |
| SSRPPRPSS  | NPGLSLDAR              | NTR2_HUMAN  |             |             | Neurotensin receptor type 2;                                | 2.87                            | 0.17                  | 27.10                | -3.91 |
| IDELEPRRPR | YRVPDVLVADPPIAR        | GANAB_HUMAN |             |             | Neutral alpha-glucosidase                                   | 0.08                            | 0.00                  | 39.10                | -1.69 |
| LTSRLQGVGA | LGQAASDNSGPEDAKR       | NOMO1_HUMAN | NOMO2_HUMAN | NOMO3_HUMAN | Nodal modulator 1;                                          | 0.23                            | 0.02                  | 41.30                | -1.25 |
| REQEIRMGQM | AMGGAMGINNR            | NONO_HUMAN  |             |             | Non-POU domain-                                             | 0.59                            | 0.04                  | 33.80                | -3.30 |
| AFSQFGPIER | AVVIVDDR               | NONO_HUMAN  | SFPQ_HUMAN  |             | Non-POU domain-containing octamer-                          | -0.04                           | 0.00                  | 33.70                | -1.19 |
| ELALKATLVE | SSTSGFTPGGGGSSVSMIASR  | NASP_HUMAN  |             |             | Nuclear autoantigenic sperm protein;                        | 0.16                            | 0.02                  | 93.90                | -4.65 |
| LKATLVESST | SGFTPGGGGSSVSMIASR     | NASP_HUMAN  |             |             | Nuclear autoantigenic                                       | 0.08                            | 0.01                  | 98.00                | -1.54 |
| QATEMLYMRL | DTMNTTCVDR             | NCBP1_HUMAN |             |             | Nuclear cap-binding protein subunit 1;                      | -6.27                           | 0.00                  | 22.60                | -6.49 |
| IQKLQRQLR  | SRPQGLTEAEQR           | NFKB2_HUMAN |             |             | Nuclear factor NF-kappa-B p100 subunit;                     | 0.08                            | 0.01                  | 34.10                | -3.35 |
| NLNKTIQNSS | VSPTSSSSSSSTGETQTQSSSR | NUFP2_HUMAN |             |             | Nuclear fragile X mental retardation-interacting protein 2; | 1.12                            | 0.09                  | 38.10                | 1.17  |
| IPARSQAPLE | SSLDSLGDVFLDSGR        | NUMA1_HUMAN |             |             | Nuclear mitotic apparatus                                   | 0.44                            | 0.03                  | 72.30                | -3.37 |
| ASSTSLVALS | AEATPATTGVPDAR         | NU214_HUMAN |             |             | Nuclear pore complex protein Nup214;                        | 0.73                            | 0.07                  | 47.60                | -0.72 |

Table S5

| Non-prime  | Prime                    | Id 1        | Id 2 | Id 3 | Protein (Id1)                                  | Fold-change (log <sub>2</sub> ) | Fc standard deviation | X! Tandem hyperscore | ppm   |
|------------|--------------------------|-------------|------|------|------------------------------------------------|---------------------------------|-----------------------|----------------------|-------|
| VSDSHFQRVS | AAVLPLVHPLPEGLR          | NCOR1_HUMAN |      |      | Nuclear receptor corepressor 1;                | 0.11                            | 0.01                  | 41.90                | 0.87  |
| GPSYSNNLAK | AGLNGASCHLEYSPEP         | RORG_HUMAN  |      |      | Nuclear receptor ROR-gamma;                    | -3.66                           | 0.46                  | 31.20                | 0.11  |
| VRNRKVVDYS | QFQESDDADEDYGR           | NUCKS_HUMAN |      |      | Nuclear ubiquitous casein and cyclin-dependent | 1.27                            | 0.13                  | 68.50                | 0.29  |
| RGPPRQRQPR | EDGNEEDKENQGDETQGQPPQR   | YBOX1_HUMAN |      |      | Nuclease-sensitive                             | 1.55                            | 0.19                  | 63.90                | -1.53 |
| RNYQQNYQNS | ESGEKNEGSESAPEGQAQQR     | YBOX1_HUMAN |      |      | Nuclease-sensitive element-binding protein 1;  | 1.47                            | 0.17                  | 51.20                | 0.28  |
| GPPRNYQQNY | QNSGESGEKNEGSESAPEGQAQQR | YBOX1_HUMAN |      |      | Nuclease-sensitive                             | 1.29                            | 0.20                  | 47.30                | 1.28  |
| PRNYQQNYQN | SESGEKNEGSESAPEGQAQQR    | YBOX1_HUMAN |      |      | Nuclease-sensitive                             | 1.04                            | 0.11                  | 69.10                | 0.31  |
| RRPYGRRPQY | SNPPVQGEVMEGADNQGAGEQGF  | YBOX1_HUMAN |      |      | Nuclease-sensitive                             | 0.95                            | 0.10                  | 66.50                | -1.44 |
| EAELNAKAQR | LSQETEALGR               | NUCB1_HUMAN |      |      | Nucleobindin-1;                                | 3.16                            | 0.22                  | 40.70                | 3.36  |
| SQGRLEAQKR | ELQQAVLHMEQR             | NUCB1_HUMAN |      |      | Nucleobindin-1;                                | 1.07                            | 0.07                  | 47.80                | -2.12 |
| SRSITRKRKR | EDSAPPSSVAR              | NOG1_HUMAN  |      |      | Nucleolar GTP-binding                          | -0.20                           | 0.01                  | 29.50                | -1.66 |
| SKISEKRKKK | LRLLEQQELR               | NOL10_HUMAN |      |      | Nucleolar protein 10;                          | 0.49                            | 0.05                  | 36.00                | -2.92 |
| IEEKGAVEAL | AAALAHISGATSVDQR         | DDX21_HUMAN |      |      | Nucleolar RNA helicase 2;                      | 1.35                            | 0.07                  | 31.10                | -0.25 |
| LAIKCHWTQR | AAVIGDVIR                | DDX21_HUMAN |      |      | Nucleolar RNA helicase 2;                      | 1.31                            | 0.10                  | 30.80                | -4.35 |
| EEKGAVEALA | AALAHISGATSVDQR          | DDX21_HUMAN |      |      | Nucleolar RNA helicase 2;                      | 0.90                            | 0.08                  | 44.60                | -3.73 |
| KTGISDVFAK | NDLAVVDVR                | NUCL_HUMAN  |      |      | Nucleolin;                                     | 2.26                            | 0.07                  | 36.40                | -3.21 |
| KTLFVKGLSE | DTTEETLKESFDGSVR         | NUCL_HUMAN  |      |      | Nucleolin;                                     | 1.63                            | 0.16                  | 32.20                | -2.03 |
| SQPSKTLFVK | GLSEDTTEETLKESFDGSVR     | NUCL_HUMAN  |      |      | Nucleolin;                                     | 1.28                            | 0.10                  | 27.40                | -1.06 |
| PELKTGISDV | FAKNDLAVVDVR             | NUCL_HUMAN  |      |      | Nucleolin;                                     | 0.91                            | 0.03                  | 32.80                | -3.18 |
| LPYKVTQDEL | KEVFEDAAEIR              | NUCL_HUMAN  |      |      | Nucleolin;                                     | 0.75                            | 0.04                  | 33.00                | -2.56 |



Table S5

| Non-prime  | Prime                 | Id 1       | Id 2       | Id 3       | Protein (Id1)                    | Fold-change (log <sub>2</sub> ) | Fc standard deviation | X! Tandem hyperscore | ppm   |
|------------|-----------------------|------------|------------|------------|----------------------------------|---------------------------------|-----------------------|----------------------|-------|
| NLPYKVTQDE | LKEVFEDAAEIR          | NUCL_HUMAN |            |            | Nucleolin;                       | 0.69                            | 0.04                  | 43.60                | -3.49 |
| PYKVTQDELK | EVFEDAAEIR            | NUCL_HUMAN |            |            | Nucleolin;                       | 0.57                            | 0.03                  | 51.80                | -1.82 |
| AKNLPYKVTQ | DELKEVFEDAAEIR        | NUCL_HUMAN |            |            | Nucleolin;                       | 0.52                            | 0.03                  | 52.60                | -2.32 |
| NFNKSAPELK | TGISDVFAKNDLAVVDVR    | NUCL_HUMAN |            |            | Nucleolin;                       | 0.42                            | 0.03                  | 35.20                | -2.11 |
| YKVTQDELKE | VFEDAAEIR             | NUCL_HUMAN |            |            | Nucleolin;                       | -0.08                           | 0.00                  | 29.50                | -1.94 |
| FNKSAPELKT | GISDVFAKNDLAVVDVR     | NUCL_HUMAN |            |            | Nucleolin;                       | -0.23                           | 0.01                  | 52.90                | -1.32 |
| KSAPELKTGI | SDVFAKNDLAVVDVR       | NUCL_HUMAN |            |            | Nucleolin;                       | -0.23                           | 0.01                  | 30.20                | -3.14 |
| SAPELKTGIS | DVFAKNDLAVVDVR        | NUCL_HUMAN |            |            | Nucleolin;                       | -0.25                           | 0.02                  | 42.90                | 1.54  |
| LKADKDYHFK | VDNDENEHQLSLR         | NPM_HUMAN  |            |            | Nucleophosmin;                   | 2.85                            | 0.22                  | 31.50                | -3.30 |
| DKDYHFKVDN | DENEHQLSLR            | NPM_HUMAN  |            |            | Nucleophosmin;                   | -0.29                           | 0.02                  | 23.70                | 3.53  |
| ATLKMSVQPT | VSLGGFEITPPVVLR       | NPM_HUMAN  |            |            | Nucleophosmin;                   | -0.96                           | 0.13                  | 63.90                | -1.48 |
| LKMSVQPTVS | LGGFEITPPVVLR         | NPM_HUMAN  |            |            | Nucleophosmin;                   | -1.00                           | 0.04                  | 34.60                | -8.10 |
| VQPTVSLGGF | EITPPVVLR             | NPM_HUMAN  |            |            | Nucleophosmin;                   | -1.16                           | 0.03                  | 25.60                | -2.74 |
| TLKMSVQPTV | SLGGFEITPPVVLR        | NPM_HUMAN  |            |            | Nucleophosmin;                   | -1.39                           | 0.07                  | 48.70                | -0.92 |
| QPTVSLGGFE | ITPPVVLR              | NPM_HUMAN  |            |            | Nucleophosmin;                   | -1.60                           | 0.10                  | 25.00                | -3.55 |
| AEQRGQNLLL | TNLQTIQGILER          | TPR_HUMAN  |            |            | Nucleoprotein TPR;               | 0.93                            | 0.07                  | 39.50                | -0.28 |
| DGYEADDAEG | GDGTPGTETEESMGGGEGNHR | TPR_HUMAN  |            |            | Nucleoprotein TPR;               | 0.20                            | 0.02                  | 34.70                | 1.22  |
| YEADDAEGGD | GTDPGTETEESMGGGEGNHR  | TPR_HUMAN  |            |            | Nucleoprotein TPR;               | -0.79                           | 0.07                  | 57.90                | -2.78 |
| EGLNVVKTGR | VMLGETNPADSKPGTIR     | NDKA_HUMAN | NDK8_HUMAN | NDKB_HUMAN | Nucleoside diphosphate kinase A; | 3.15                            | 0.23                  | 35.40                | -4.50 |
| MANLER     | TFIAIKPDGVQR          | NDKA_HUMAN | NDKB_HUMAN |            | Nucleoside diphosphate kinase A; | 1.58                            | 0.10                  | 21.70                | -1.35 |
| NVVKTGRVML | GETNPADSKPGTIR        | NDKA_HUMAN | NDK8_HUMAN | NDKB_HUMAN | Nucleoside diphosphate           | -0.60                           | 0.04                  | 35.10                | -3.60 |

Table S5

| Non-prime  | Prime                 | Id 1        | Id 2        | Id 3 | Protein (Id1)                         | Fold-change (log <sub>2</sub> ) | Fc standard deviation | X! Tandem hyperscore | ppm   |
|------------|-----------------------|-------------|-------------|------|---------------------------------------|---------------------------------|-----------------------|----------------------|-------|
| PQILAALQER | LDGLVETPTGYIESLPR     | NP1L1_HUMAN |             |      | Nucleosome assembly protein 1-like 1; | 4.36                            | 0.37                  | 37.00                | -1.11 |
| QNPQILAALQ | ERLDGLVETPTGYIESLPR   | NP1L1_HUMAN |             |      | Nucleosome assembly protein 1-like 1; | 1.66                            | 0.12                  | 53.40                | -1.75 |
| LKARQLTVQM | MQNPQILAALQER         | NP1L1_HUMAN |             |      | Nucleosome assembly protein 1-like 1; | 1.34                            | 0.11                  | 64.10                | -1.23 |
| QVRCAHIEAK | FYEEVHDLER            | NP1L1_HUMAN | NP1L4_HUMAN |      | Nucleosome assembly protein 1-like 1; | 0.69                            | 0.03                  | 31.20                | 1.54  |
| YEEVHDLERK | YAVLYQPLFDKR          | NP1L1_HUMAN |             |      | Nucleosome assembly protein 1-like 1; | 0.20                            | 0.01                  | 27.10                | -2.97 |
| ILAALQERLD | GLVETPTGYIESLPR       | NP1L1_HUMAN |             |      | Nucleosome assembly protein 1-like 1; | -0.04                           | 0.00                  | 79.70                | -0.78 |
| DLDDDAEAIL | AADFEIGHFLR           | NP1L1_HUMAN |             |      | Nucleosome assembly protein 1-like 1; | -1.34                           | 0.07                  | 27.90                | -1.75 |
| LLSGRPTRA  | DSKVFGDLDQVR          | OLM2A_HUMAN |             |      | Olfactomedin-like protein 2A;         | 1.07                            | 0.08                  | 42.30                | -1.38 |
| FLSFLSFSET | CYTLGIIPR             | O10Z1_HUMAN |             |      | Olfactory receptor 10Z1;              | -2.92                           | 0.22                  | 25.00                | -7.18 |
| GRVDEGPQPR | SVEPQDAGPLER          | OGFR_HUMAN  |             |      | Opioid growth factor                  | -0.29                           | 0.01                  | 40.10                | -2.49 |
| RNIEPHLKKA | MQTVYLR               | ORC5_HUMAN  |             |      | Origin recognition complex subunit 5; | 4.45                            | 0.24                  | 25.10                | -4.90 |
| FGFYRSGQAK | ETIPLQETSPLYTQDR      | PPT1_HUMAN  |             |      | Palmitoyl-protein thioesterase 1;     | 5.17                            | 0.46                  | 39.80                | -1.92 |
| QHQGVFGLPR | CPGESSHICDFIR         | PPT1_HUMAN  |             |      | Palmitoyl-protein thioesterase 1;     | 4.22                            | 0.36                  | 31.40                | -2.24 |
| VDSEWFGFYR | SGQAKETIPLQETSPLYTQDR | PPT1_HUMAN  |             |      | Palmitoyl-protein                     | 1.20                            | 0.09                  | 57.00                | -1.54 |
| KALRERWLE  | GTPSSASEGDEDLR        | PALM_HUMAN  |             |      | Paralemmin-1;                         | 1.83                            | 0.17                  | 59.40                | -2.07 |
| IEVTPSVLRA | NMPLHVR               | PARD3_HUMAN |             |      | Partitioning defective 3 homolog;     | 1.42                            | 0.13                  | 33.40                | -0.56 |
| QQPQSSSPVY | GSSAKTSSVSNPQDSVGSPCR | PAXI_HUMAN  |             |      | Paxillin;                             | 1.09                            | 0.07                  | 48.60                | -3.68 |
| SVAPANSALG | QTQPSDQDTLVQR         | PDLI5_HUMAN |             |      | PDZ and LIM domain                    | 2.17                            | 0.13                  | 23.80                | -0.91 |

Table S5

| Non-prime  | Prime                    | Id 1        | Id 2        | Id 3 | Protein (Id1)                                      | Fold-change (log <sub>2</sub> ) | Fc standard deviation | X! Tandem hyperscore | ppm   |
|------------|--------------------------|-------------|-------------|------|----------------------------------------------------|---------------------------------|-----------------------|----------------------|-------|
| TGRISNSATY | SGSVAPANSALGQTQPSDQDTLVQ | PDLI5_HUMAN |             |      | PDZ and LIM domain                                 | 0.41                            | 0.04                  | 41.70                | 4.45  |
| AVLEELRQTR | ADLHAVQGWAAR             | PTX3_HUMAN  |             |      | Pentraxin-related protein                          | 5.85                            | 0.82                  | 36.70                | 0.00  |
| CAPGAPAEAR | LTSALDELLQATR            | PTX3_HUMAN  |             |      | Pentraxin-related protein<br>PTX3;                 | 5.57                            | 0.41                  | 68.90                | 0.75  |
| EAQRPEEAGR | ALAAVLEELR               | PTX3_HUMAN  |             |      | Pentraxin-related protein                          | 4.70                            | 0.22                  | 52.30                | -2.78 |
| LQRLREELGR | LAESLARPCAPGAPAEAR       | PTX3_HUMAN  |             |      | Pentraxin-related protein<br>PTX3;                 | 2.93                            | 0.14                  | 50.20                | 2.20  |
| PGAPAEARLT | SALDELLQATR              | PTX3_HUMAN  |             |      | Pentraxin-related protein<br>PTX3;                 | 2.72                            | 0.20                  | 32.10                | -2.41 |
| AARSWLPAGC | ETAILFPMR                | PTX3_HUMAN  |             |      | Pentraxin-related protein<br>PTX3;                 | 1.13                            | 0.06                  | 25.20                | -2.08 |
| APGAPAEARL | TSALDELLQATR             | PTX3_HUMAN  |             |      | Pentraxin-related protein<br>PTX3;                 | 0.04                            | 0.00                  | 43.70                | -1.78 |
| SSGRVLGRFR | GKGSGLNGLGNFFASR         | AMD_HUMAN   |             |      | Peptidyl-glycine alpha-amidating                   | 0.82                            | 0.03                  | 36.80                | -0.73 |
| KTEWLDGKHV | AFGKVKER                 | PAL4A_HUMAN | PAL4G_HUMAN |      | Peptidyl-prolyl cis-trans isomerase A-like 4A/B/C; | 7.97                            | 0.99                  | 16.90                | 0.20  |
| SCFHRIIPGF | MCQGGDFTR                | PAL4A_HUMAN | PPIA_HUMAN  |      | Peptidyl-prolyl cis-trans isomerase A-like 4A/B/C; | -0.89                           | 0.03                  | 30.00                | -6.42 |
| GKHVVFGKVK | EGMNIVEAMER              | PPIA_HUMAN  |             |      | Peptidyl-prolyl cis-trans isomerase A;             | 5.29                            | 0.37                  | 29.10                | -4.59 |
| FGYKGSCFHR | IIPGFMCQGGDFTR           | PPIA_HUMAN  | PAL4A_HUMAN |      | Peptidyl-prolyl cis-trans isomerase A;             | 1.53                            | 0.07                  | 31.50                | -0.43 |
|            | MVNPTVFFDIAVDGEPLGR      | PPIA_HUMAN  |             |      | Peptidyl-prolyl cis-trans isomerase A;             | 0.24                            | 0.03                  | 90.80                | 0.25  |
| FMLGKQEVIR | GWEEGVAQMSVGQR           | FKB1A_HUMAN |             |      | Peptidyl-prolyl cis-trans isomerase FKB1A;         | 2.02                            | 0.19                  | 67.20                | 1.98  |
|            | MGVQVETISPGDGR           | FKB1A_HUMAN |             |      | Peptidyl-prolyl cis-trans isomerase FKB1A;         | 0.26                            | 0.02                  | 60.70                | 0.30  |
| VTGQAAPVAG | LGSDAELQIER              | FKBP9_HUMAN |             |      | Peptidyl-prolyl cis-trans isomerase FKBP9;         | 0.89                            | 0.04                  | 39.10                | -1.19 |

Table S5

| Non-prime   | Prime                | Id 1        | Id 2        | Id 3 | Protein (Id1)                               | Fold-change (log <sub>2</sub> ) | Fc standard deviation | X! Tandem hyperscore | ppm   |
|-------------|----------------------|-------------|-------------|------|---------------------------------------------|---------------------------------|-----------------------|----------------------|-------|
| TGKVSASFTS  | TAMVPETTHEAAAIDEDVLR | PPIL2_HUMAN |             |      | Peptidyl-prolyl cis-trans isomerase-like 2; | -0.16                           | 0.01                  | 56.40                | -1.04 |
| RVLQEKKQKM  | DKLLGELHTLR          | PCM1_HUMAN  |             |      | Pericentriolar material 1 protein;          | 4.01                            | 0.65                  | 22.50                | -2.00 |
| MSADGAEAD   | GSTQVTVEEPVQQPSVVDR  | PLIN3_HUMAN |             |      | Perilipin-3;                                | 0.81                            | 0.12                  | 68.00                | -5.02 |
| NIPLVSDPKR  | TIAQDYGVKKADEGISFR   | PRDX1_HUMAN |             |      | Peroxiredoxin-1;                            | 2.74                            | 0.16                  | 34.30                | -1.03 |
| TIAQDYGVLK  | ADEGISFR             | PRDX1_HUMAN |             |      | Peroxiredoxin-1;                            | 1.20                            | 0.02                  | 29.90                | -4.01 |
| FIIDGKGVL   | QITVNDLPVGR          | PRDX1_HUMAN | PRDX2_HUMAN |      | Peroxiredoxin-1;                            | 0.78                            | 0.05                  | 37.40                | 1.93  |
| YLED SGHTLR | GLFIIDDKGILR         | PRDX1_HUMAN | PRDX4_HUMAN |      | Peroxiredoxin-1;                            | 0.62                            | 0.03                  | 29.40                | -1.47 |
| KRTIAQDYGV  | LKADEGISFR           | PRDX1_HUMAN |             |      | Peroxiredoxin-1;                            | -0.86                           | 0.05                  | 28.10                | 0.91  |
| GLFIIDGKGV  | LRQITVNDLPVGR        | PRDX1_HUMAN | PRDX2_HUMAN |      | Peroxiredoxin-1;                            | -2.08                           | 0.18                  | 43.90                | -3.89 |
| IIDGKGVL    | RQITVNDLPVGR         | PRDX2_HUMAN | PRDX1_HUMAN |      | Peroxiredoxin-2;                            | -1.00                           | 0.06                  | 26.60                | -0.54 |
| TPRKEGGLGP  | LNIPLADVTR           | PRDX2_HUMAN |             |      | Peroxiredoxin-2;                            | -2.16                           | 0.19                  | 41.30                | -2.14 |
| LLLFLLPAGA  | VQGWETEERPR          | PRDX4_HUMAN |             |      | Peroxiredoxin-4;                            | -0.18                           | 0.02                  | 21.80                | -2.19 |
| SWGILFSHPR  | DFTPVCCTTELGR        | PRDX6_HUMAN |             |      | Peroxiredoxin-6;                            | 2.34                            | 0.22                  | 37.40                | 4.77  |
| MP          | GGLLLGDVAPNFEANTTVGR | PRDX6_HUMAN |             |      | Peroxiredoxin-6;                            | 0.90                            | 0.12                  | 62.80                | -2.91 |
| TSLTHTSRPP  | AALTPVPLSQGDLSHPPR   | PHF23_HUMAN |             |      | PHD finger protein 23;                      | 0.21                            | 0.01                  | 31.80                | -1.85 |
| GEDKGGYVIK  | ASEGPAFFPGR          | SYFB_HUMAN  |             |      | Phenylalanine--tRNA ligase beta subunit;    | 0.40                            | 0.03                  | 37.10                | -6.83 |
| LRKKGILPPK  | ESLKELEEEAEEQR       | PDCL3_HUMAN |             |      | Phosducin-like protein 3;                   | 0.71                            | 0.05                  | 46.30                | -2.20 |
| LVYEQDRPLK  | CDEPILSNR            | PEBP1_HUMAN |             |      | Phosphatidylethanolamine-binding protein 1; | 1.81                            | 0.07                  | 33.70                | -1.94 |
| VWLVYEQDRP  | LKCDEPILSNR          | PEBP1_HUMAN |             |      | Phosphatidylethanolamine-binding protein 1; | 0.91                            | 0.07                  | 36.40                | -0.42 |
| WDGLDSGKLY  | TLVLTPDAPSR          | PEBP1_HUMAN |             |      | Phosphatidylethanolamine-                   | -0.63                           | 0.06                  | 35.20                | 5.30  |

Table S5

| Non-prime  | Prime             | Id 1        | Id 2        | Id 3 | Protein (Id1)                                       | Fold-change (log <sub>2</sub> ) | Fc standard deviation | X! Tandem hyperscore | ppm   |
|------------|-------------------|-------------|-------------|------|-----------------------------------------------------|---------------------------------|-----------------------|----------------------|-------|
| SWDGLDSGKL | YTLVLTPDAPSR      | PEBP1_HUMAN |             |      | Phosphatidylethanolamine-binding protein 1;         | -2.08                           | 0.09                  | 49.20                | -0.74 |
| IPENRIRSTR | SVENLPECGITHEQR   | PI4KB_HUMAN |             |      | Phosphatidylinositol 4-kinase beta;                 | -0.34                           | 0.03                  | 36.60                | -4.27 |
| KDCVGPEVEK | ACANPAAGSVILLENLR | PGK1_HUMAN  |             |      | Phosphoglycerate kinase 1;                          | 3.00                            | 0.15                  | 67.90                | 2.17  |
| IEAFRASLSK | LGDVYVNDAFGTAHR   | PGK1_HUMAN  | PGK2_HUMAN  |      | Phosphoglycerate kinase 1;                          | 2.11                            | 0.18                  | 66.60                | -1.50 |
| EAFRASLSKL | GDVYVNDAFGTAHR    | PGK1_HUMAN  | PGK2_HUMAN  |      | Phosphoglycerate kinase                             | -0.89                           | 0.07                  | 33.90                | -4.69 |
| CVGPEVEKAC | ANPAAGSVILLENLR   | PGK1_HUMAN  |             |      | Phosphoglycerate kinase 1;                          | -1.08                           | 0.05                  | 72.80                | 0.19  |
| RASLSKLGDV | YVNDAFGTAHR       | PGK1_HUMAN  | PGK2_HUMAN  |      | Phosphoglycerate kinase 1;                          | -1.20                           | 0.06                  | 28.30                | 3.89  |
| PEVEKACANP | AAGSVILLENLR      | PGK1_HUMAN  |             |      | Phosphoglycerate kinase                             | -1.66                           | 0.16                  | 39.10                | -3.10 |
| IVPQIKAGKR | VLIAAHGNSLR       | PGAM1_HUMAN | PGAM2_HUMAN |      | Phosphoglycerate mutase                             | 1.40                            | 0.06                  | 39.10                | -2.88 |
| TERNWSLPNR | AVEPQLQEEER       | PLTP_HUMAN  |             |      | Phospholipid transfer protein;                      | 3.41                            | 0.21                  | 47.40                | -4.13 |
| LELVKQEGLR | FLEQELETITIPDLR   | PLTP_HUMAN  |             |      | Phospholipid transfer protein;                      | 2.03                            | 0.21                  | 29.90                | -2.00 |
| PVLYHAGTVL | LNSLLDTPVVR       | PLTP_HUMAN  |             |      | Phospholipid transfer                               | 0.09                            | 0.01                  | 31.40                | -1.82 |
| GISVLEMSHR | SSDFAKIINNTENLVR  | SERC_HUMAN  |             |      | Phosphoserine                                       | 2.20                            | 0.11                  | 30.90                | -2.71 |
| VGSAGVTVVI | VRDDLLGFALR       | SERC_HUMAN  |             |      | Phosphoserine                                       | 0.52                            | 0.02                  | 44.80                | -0.38 |
| KVIFLQGGGC | GQFSAVPLNLIGLKAGR | SERC_HUMAN  |             |      | Phosphoserine                                       | 0.37                            | 0.02                  | 32.00                | -1.72 |
| VRGHWFSPR  | TEYTVAVQTASK      | PHIPL_HUMAN |             |      | Phytanoyl-CoA hydroxylase-interacting protein-like; | 3.91                            | 0.23                  | 29.80                | -3.91 |
| ALLWSSLGA  | DDGVAEVLAR        | CQ101_HUMAN |             |      | PKHD domain-containing                              | -0.08                           | 0.01                  | 46.80                | -2.13 |
| LPPPCPAHS  | ATRFDPTWESLDAR    | FUCO2_HUMAN |             |      | Plasma alpha-L-fucosidase;                          | 1.06                            | 0.07                  | 35.20                | -5.12 |
| YNQKSIHSFM | THPEFAIEEELPR     | AT2B4_HUMAN |             |      | Plasma membrane calcium-transporting ATPase 4;      | 1.66                            | 0.05                  | 32.00                | 0.75  |
| PYNQKSIHSF | MTHPEFAIEEELPR    | AT2B4_HUMAN |             |      | Plasma membrane calcium-transporting                | 0.84                            | 0.02                  | 52.00                | -2.55 |

Table S5

| Non-prime  | Prime              | Id 1        | Id 2 | Id 3 | Protein (Id1)                                 | Fold-change (log <sub>2</sub> ) | Fc standard deviation | X! Tandem hyperscore | ppm   |
|------------|--------------------|-------------|------|------|-----------------------------------------------|---------------------------------|-----------------------|----------------------|-------|
| MPG        | HLQEGFGCVVTNR      | PAIRB_HUMAN |      |      | Plasminogen activator inhibitor 1 RNA-binding | 0.81                            | 0.07                  | 36.90                | -1.81 |
| GGGVGGPGAK | SAAQAAAQTSNAAGKQLR | PAIRB_HUMAN |      |      | Plasminogen activator                         | -0.55                           | 0.06                  | 40.40                | -3.47 |
| IWPPCVEVKR | CTGCCNTSSVKCQPSR   | PDGFA_HUMAN |      |      | Platelet-derived growth                       | 1.56                            | 0.13                  | 22.50                | -1.79 |
| KRPLPIRRKR | SIEEAVPAVCKTR      | PDGFA_HUMAN |      |      | Platelet-derived growth factor subunit A;     | 1.53                            | 0.08                  | 45.60                | -2.22 |
| GCGYLAHVLA | EEAEIPR            | PDGFA_HUMAN |      |      | Platelet-derived growth                       | 1.21                            | 0.06                  | 30.20                | -1.60 |
| GCGYLAHVLA | EEAEIPREVIER       | PDGFA_HUMAN |      |      | Platelet-derived growth                       | 1.03                            | 0.12                  | 31.10                | 1.67  |
| EAEAAREKQR | ALQALEELR          | PLEC_HUMAN  |      |      | Plectin;                                      | 3.91                            | 0.54                  | 41.10                | -4.48 |
| QLAEGTAQQR | LAAEQELIR          | PLEC_HUMAN  |      |      | Plectin;                                      | 2.53                            | 0.13                  | 40.80                | -0.28 |
| IEEFRAKIER | ARSDEGQLSPATR      | PLEC_HUMAN  |      |      | Plectin;                                      | 2.48                            | 0.09                  | 41.60                | -3.03 |
| RMVEGYQGLR | CDNFTSSWR          | PLEC_HUMAN  |      |      | Plectin;                                      | 2.09                            | 0.15                  | 27.10                | -1.91 |
| KQRLEAEAGR | FRELAEEAAR         | PLEC_HUMAN  |      |      | Plectin;                                      | 1.80                            | 0.10                  | 28.30                | 0.00  |
| QLGRQLRYR  | ESADPLGAWLQDAR     | PLEC_HUMAN  |      |      | Plectin;                                      | 1.67                            | 0.10                  | 61.00                | 2.44  |
| ATKASLKKLR | AQAEAQQPTFDALRDEL  | PLEC_HUMAN  |      |      | Plectin;                                      | 1.65                            | 0.14                  | 40.50                | -2.06 |
| MPLADSQAVR | EQLRQEQALLEEIER    | PLEC_HUMAN  |      |      | Plectin;                                      | 1.51                            | 0.07                  | 35.10                | -2.35 |
| AAVDAQQQR  | SIQEELQQLR         | PLEC_HUMAN  |      |      | Plectin;                                      | 1.42                            | 0.09                  | 48.10                | -1.18 |
| VRLQLEATER | QRGGAEGELQALR      | PLEC_HUMAN  |      |      | Plectin;                                      | 1.39                            | 0.07                  | 41.60                | 3.04  |
| LKAEATEAAR | QRSQVEEELFSVR      | PLEC_HUMAN  |      |      | Plectin;                                      | 1.20                            | 0.05                  | 29.60                | -1.47 |
| QLQRGERSVR | DVAEVDTVR          | PLEC_HUMAN  |      |      | Plectin;                                      | 0.95                            | 0.12                  | 37.70                | -1.35 |
| LQQRCPDQL  | TGLSLLPLSEKAAR     | PLEC_HUMAN  |      |      | Plectin;                                      | 0.74                            | 0.05                  | 32.30                | -5.70 |
| RRKVSAQLRQ | EAGILSAEELQR       | PLEC_HUMAN  |      |      | Plectin;                                      | 0.72                            | 0.05                  | 59.20                | -0.52 |

Table S5

| Non-prime  | Prime               | Id 1        | Id 2 | Id 3 | Protein (Id1)                          | Fold-change (log <sub>2</sub> ) | Fc standard deviation | X! Tandem hyperscore | ppm   |
|------------|---------------------|-------------|------|------|----------------------------------------|---------------------------------|-----------------------|----------------------|-------|
| IIDRRSGRQY | DIDDAIAKNLIDR       | PLEC_HUMAN  |      |      | Plectin;                               | 0.67                            | 0.06                  | 33.00                | -4.67 |
| MEELVRSQVM | DEATALQLR           | PLEC_HUMAN  |      |      | Plectin;                               | 0.47                            | 0.03                  | 40.20                | -1.24 |
| SAPRADAKAY | SDPSTGEPATYGELQQR   | PLEC_HUMAN  |      |      | Plectin;                               | 0.45                            | 0.04                  | 45.80                | -6.92 |
| LLQETQALQQ | SFLSEKDSLLQR        | PLEC_HUMAN  |      |      | Plectin;                               | 0.45                            | 0.03                  | 25.30                | 1.14  |
| YTQLLRRCRR | DDGTGQLLLPLSDAR     | PLEC_HUMAN  |      |      | Plectin;                               | 0.40                            | 0.03                  | 43.60                | -1.31 |
| LPSDMAVALL | EAQAGTGHIIDPATSAR   | PLEC_HUMAN  |      |      | Plectin;                               | 0.18                            | 0.01                  | 35.70                | 1.44  |
| VVPATTQRTL | ARPGPEPATDER        | PLEC_HUMAN  |      |      | Plectin;                               | 0.13                            | 0.02                  | 42.10                | -1.87 |
| QLQRGERSVR | DVAEVDTVRR          | PLEC_HUMAN  |      |      | Plectin;                               | -0.10                           | 0.01                  | 28.70                | -1.43 |
| PSDMAVALLE | AQAGTGHIIDPATSAR    | PLEC_HUMAN  |      |      | Plectin;                               | -0.23                           | 0.01                  | 32.20                | -2.68 |
| EAAVDAQQK  | RSIQEELQQLR         | PLEC_HUMAN  |      |      | Plectin;                               | -0.49                           | 0.04                  | 33.70                | -1.74 |
| RLTVDEAVRK | GLVGPETHDR          | PLEC_HUMAN  |      |      | Plectin;                               | -0.55                           | 0.02                  | 40.90                | -1.33 |
| LLPLSEKAAR | ARQEELYSELQAR       | PLEC_HUMAN  |      |      | Plectin;                               | -0.58                           | 0.06                  | 52.20                | 2.03  |
| KGRLCFEGLR | SLVPAAELLESR        | PLEC_HUMAN  |      |      | Plectin;                               | -0.58                           | 0.03                  | 47.10                | -2.42 |
| MLSGNAGGFR | SRSSSVGSSSYPIPAVSR  | PLEC_HUMAN  |      |      | Plectin;                               | -0.76                           | 0.04                  | 48.80                | -3.88 |
| VAYQRGYLNK | DTHDQLSEPSEVR       | PLEC_HUMAN  |      |      | Plectin;                               | -0.82                           | 0.06                  | 38.10                | -1.87 |
| ALSAPRADAK | AYSDPSTGEPATYGELQQR | PLEC_HUMAN  |      |      | Plectin;                               | -0.86                           | 0.08                  | 82.40                | 2.57  |
| EAGVSDMKLG | DQGPPEEAEDR         | PODXL_HUMAN |      |      | Podocalyxin;                           | 0.20                            | 0.01                  | 30.70                | -0.08 |
| TVTNAVGMGR | AEQVIFVR            | PVRL2_HUMAN |      |      | Poliovirus receptor-related protein 2; | 1.11                            | 0.07                  | 35.50                | -2.22 |
| ILSPWGAEVK | AEPVEVVAPR          | PARP1_HUMAN |      |      | Poly [ADP-ribose]                      | 1.00                            | 0.10                  | 44.10                | -2.10 |

Table S5

| Non-prime  | Prime                   | Id 1        | Id 2        | Id 3        | Protein (Id1)                               | Fold-change (log <sub>2</sub> ) | Fc standard deviation | X! Tandem hyperscore | ppm   |
|------------|-------------------------|-------------|-------------|-------------|---------------------------------------------|---------------------------------|-----------------------|----------------------|-------|
| TSSESIPQTA | TQPAISPPP KPTVSR        | PAPOA_HUMAN |             |             | Poly(A) polymerase alpha;                   | 1.95                            | 0.13                  | 31.20                | 0.49  |
| NNLIGCIIGR | QGANINEIR               | PCBP1_HUMAN |             |             | Poly(rC)-binding protein 1;                 | 1.91                            | 0.14                  | 27.40                | -4.22 |
| LSQSPQGRVM | TIPYQMPASSPVICAGGQDR    | PCBP1_HUMAN |             |             | Poly(rC)-binding protein 1;                 | 1.85                            | 0.20                  | 58.60                | 1.80  |
| KGGSKIKEIR | ESTGAQVQVAGDMLPNSTER    | PCBP1_HUMAN | PCBP2_HUMAN | PCBP3_HUMAN | Poly(rC)-binding protein 1;                 | 1.66                            | 0.09                  | 83.80                | 0.89  |
| LDAYSIQGQH | TISPLDLAKLNQVAR         | PCBP1_HUMAN |             |             | Poly(rC)-binding protein 1;                 | 1.50                            | 0.12                  | 29.50                | -1.46 |
| EVKGYWASLD | ASTQTTHELTIPNNLIGCIIGR  | PCBP1_HUMAN |             |             | Poly(rC)-binding protein 1;                 | 0.99                            | 0.06                  | 63.70                | 1.60  |
| PASTHELTIP | NDLIGCIIGR              | PCBP2_HUMAN | PCBP3_HUMAN |             | Poly(rC)-binding protein 2;                 | 1.28                            | 0.07                  | 36.90                | 2.67  |
| PEVKGYWGLD | ASAQTTSHELTIPNDLIGCIIGR | PCBP2_HUMAN |             |             | Poly(rC)-binding protein 2;                 | 0.89                            | 0.05                  | 50.30                | -0.04 |
| QQQLTNLQM  | AAVTMGFGDPLSPLQSMQAQR   | PUF60_HUMAN |             |             | Poly(U)-binding-splicing factor PUF60;      | 0.61                            | 0.06                  | 33.50                | -2.25 |
| TNLQMAAVTM | GFGDPLSPLQSMQAQR        | PUF60_HUMAN |             |             | Poly(U)-binding-splicing factor PUF60;      | 0.57                            | 0.03                  | 66.90                | -3.64 |
| QVVNLYVKNL | DDGIDDERLR              | PABP1_HUMAN | PABP3_HUMAN |             | Polyadenylate-binding protein 1;            | 1.36                            | 0.10                  | 25.70                | -0.97 |
| ITRYQVVNLY | VKNLDDGIDDER            | PABP1_HUMAN | PABP3_HUMAN |             | Polyadenylate-binding protein 1;            | 0.89                            | 0.05                  | 42.50                | -2.14 |
| VKVMTDESGK | SKGFGFVVSFER            | PABP1_HUMAN | PABP3_HUMAN |             | Polyadenylate-binding protein 1;            | 0.65                            | 0.03                  | 23.60                | -1.29 |
| STQTVGPRPA | AAAAAATPAVR             | PABP1_HUMAN | PABP3_HUMAN |             | Polyadenylate-binding protein 1;            | 0.45                            | 0.02                  | 43.90                | -0.37 |
| LKATEMVEVG | ADDDEGGAERGEAGDLR       | PTRF_HUMAN  |             |             | Polymerase I and transcript release factor; | 0.90                            | 0.10                  | 27.40                | -4.25 |
| EVLKATEMVE | VGADDDEGGAERGEAGDLR     | PTRF_HUMAN  |             |             | Polymerase I and transcript release factor; | 0.87                            | 0.10                  | 27.40                | -3.12 |
| KATEMVEVGA | DDDEGGAERGEAGDLR        | PTRF_HUMAN  |             |             | Polymerase I and transcript release factor; | 0.81                            | 0.08                  | 26.70                | -2.77 |
| EDAAALELSS | DEAVEVEEVIEESR          | PTRF_HUMAN  |             |             | Polymerase I and transcript release factor; | 0.78                            | 0.05                  | 76.90                | -0.84 |



Table S5

| Non-prime  | Prime                   | Id 1        | Id 2 | Id 3 | Protein (Id1)                                 | Fold-change (log <sub>2</sub> ) | Fc standard deviation | X! Tandem hyperscore | ppm   |
|------------|-------------------------|-------------|------|------|-----------------------------------------------|---------------------------------|-----------------------|----------------------|-------|
| IREGQVEVLK | ATEMVEVGADDDEGGAERGEAGI | PTRF_HUMAN  |      |      | Polymerase I and transcript release factor;   | 0.51                            | 0.06                  | 53.50                | -1.20 |
| GQVEVLKATE | MVEVGADDDEGGAER         | PTRF_HUMAN  |      |      | Polymerase I and                              | 0.38                            | 0.04                  | 55.40                | -0.32 |
| IREGQVEVLK | ATEMVEVGADDDEGGAER      | PTRF_HUMAN  |      |      | Polymerase I and                              | 0.31                            | 0.03                  | 93.50                | 0.11  |
| SLERQAGQIK | KLEVNEAELLR             | PTRF_HUMAN  |      |      | Polymerase I and transcript release factor;   | 0.18                            | 0.02                  | 28.30                | -2.31 |
| LKTSRDCLRK | SFTPDHVYAR              | PTRF_HUMAN  |      |      | Polymerase I and transcript release factor;   | -0.06                           | 0.00                  | 34.10                | -2.56 |
| DAERVDQAYR | ENGFNIYVSDK             | GLT10_HUMAN |      |      | Polypeptide N-                                | 1.89                            | 0.21                  | 31.00                | -2.90 |
| FAFLWVLGIA | YYMYSGGGSALAGGAGGGAGR   | GALT2_HUMAN |      |      | Polypeptide N-acetylgalactosaminyltrans       | 0.56                            | 0.05                  | 104.40               | -1.57 |
| AFLWVLGIAY | YMYSGGGSALAGGAGGGAGR    | GALT2_HUMAN |      |      | Polypeptide N-                                | 0.52                            | 0.05                  | 113.90               | -1.54 |
| FLWVLGIAYY | MYSGGGSALAGGAGGGAGR     | GALT2_HUMAN |      |      | Polypeptide N-                                | 0.41                            | 0.04                  | 99.40                | -0.19 |
| LWVLGIAYYM | YSGGGSALAGGAGGGAGR      | GALT2_HUMAN |      |      | Polypeptide N-                                | 0.18                            | 0.02                  | 88.60                | -1.72 |
| LTVAYIFVEL | LVSTFHASAGAGR           | GALT4_HUMAN |      |      | Polypeptide N-                                | 0.42                            | 0.03                  | 21.10                | -2.07 |
| ALAASAAAVD | AGMAMAGQSPVLR           | PTBP1_HUMAN |      |      | Polypyrimidine tract-binding protein 1;       | 0.11                            | 0.01                  | 64.00                | -1.75 |
| AFGLSVPNVH | GALAPLAIPSAAAAAAAAAGR   | PTBP1_HUMAN |      |      | Polypyrimidine tract-binding protein 1;       | -0.16                           | 0.01                  | 84.80                | 0.64  |
| MD         | GIVPDIAVGTKR            | PTBP1_HUMAN |      |      | Polypyrimidine tract-binding protein 1;       | -0.32                           | 0.02                  | 49.50                | -2.39 |
| MAE        | APPRRLGLGPPPGDAPR       | KCNQ4_HUMAN |      |      | Potassium voltage-gated channel subfamily KQT | 0.35                            | 0.02                  | 36.20                | -4.15 |
| HVPNSVRLWK | AAVELEEPEDAR            | PRP6_HUMAN  |      |      | Pre-mRNA-processing factor 6;                 | 0.48                            | 0.03                  | 43.50                | 0.66  |
| SAPSTSRTTA | SEPVEQSEATSKDCSR        | FL2D_HUMAN  |      |      | Pre-mRNA-splicing                             | 1.33                            | 0.18                  | 24.10                | -1.34 |
| AANPVDFLSK | ASEIMVDDEELAQHPATTEDIR  | RRMJ3_HUMAN |      |      | pre-rRNA processing protein FTSJ3;            | 0.04                            | 0.00                  | 79.10                | -0.72 |
| VIASSKKAKR | DLIDNSFNR               | RRMJ3_HUMAN |      |      | pre-rRNA processing                           | -0.89                           | 0.03                  | 29.60                | -3.46 |
| TQEMLEEAKK | NLQEEIDALESR            | PFD4_HUMAN  |      |      | Prefoldin subunit 4;                          | 2.34                            | 0.14                  | 59.20                | -1.25 |
| DLERQSEQQR | ETLAQLQQEFQR            | PFD6_HUMAN  |      |      | Prefoldin subunit 6;                          | 4.34                            | 0.36                  | 49.80                | -0.79 |

Table S5

| Non-prime  | Prime                | Id 1       | Id 2        | Id 3        | Protein (Id1) | Fold-change (log <sub>2</sub> ) | Fc standard deviation | X! Tandem hyperscore | ppm   |
|------------|----------------------|------------|-------------|-------------|---------------|---------------------------------|-----------------------|----------------------|-------|
| QLAAKEAKLR | DLEDSLAR             | LMNA_HUMAN |             |             | Prelamin-A/C; | 6.50                            | 0.42                  | 37.40                | -2.43 |
| RLAVYIDRVR | SLETENAGLR           | LMNA_HUMAN |             |             | Prelamin-A/C; | 5.42                            | 0.69                  | 43.50                | 3.58  |
| ETENAGLRLR | ITESEEVVSR           | LMNA_HUMAN |             |             | Prelamin-A/C; | 5.03                            | 0.46                  | 37.00                | -8.41 |
| ALSTALSEKR | TLEGELHDLR           | LMNA_HUMAN |             |             | Prelamin-A/C; | 4.55                            | 0.27                  | 31.10                | -2.80 |
| ALDMEINAYR | KLLEGEER             | LMNA_HUMAN | LMNB1_HUMAN | LMNB2_HUMAN | Prelamin-A/C; | 3.65                            | 0.41                  | 36.00                | -6.04 |
| LDNARQAER  | NSNLVGAHEELQQR       | LMNA_HUMAN |             |             | Prelamin-A/C; | 3.62                            | 0.30                  | 51.10                | -0.73 |
| NGKQREFESR | LADALQELR            | LMNA_HUMAN |             |             | Prelamin-A/C; | 3.32                            | 0.10                  | 36.50                | -2.74 |
| FSQHARTSGR | VAVEEVDEEGKFVR       | LMNA_HUMAN |             |             | Prelamin-A/C; | 2.59                            | 0.14                  | 30.70                | -3.25 |
| TVTRSYRSVG | GSGGGSFGDNLVTR       | LMNA_HUMAN |             |             | Prelamin-A/C; | 2.46                            | 0.09                  | 58.90                | -1.32 |
| NTWGCGNSLR | TALINSTGEEVAMR       | LMNA_HUMAN |             |             | Prelamin-A/C; | 2.44                            | 0.26                  | 55.40                | -1.25 |
| LSPTRITRLQ | EKEDLQELNDR          | LMNA_HUMAN |             |             | Prelamin-A/C; | 1.15                            | 0.07                  | 35.90                | 4.22  |
| HSPPTDLVWK | AQNTWGCGNSLR         | LMNA_HUMAN |             |             | Prelamin-A/C; | 0.71                            | 0.06                  | 43.60                | 0.86  |
| TPSQRRATRS | GAQASSTPLSPTR        | LMNA_HUMAN |             |             | Prelamin-A/C; | 0.61                            | 0.04                  | 39.90                | -5.51 |
| SASGSGAQVG | GPISSGSSASSVTVTR     | LMNA_HUMAN |             |             | Prelamin-A/C; | 0.59                            | 0.06                  | 73.70                | -1.51 |
| ADKASASGSG | AQVGGPISSGSSASSVTVTR | LMNA_HUMAN |             |             | Prelamin-A/C; | 0.52                            | 0.07                  | 79.90                | 0.27  |
| SVTVTRSYRS | VGGSGGGSFGDNLVTR     | LMNA_HUMAN |             |             | Prelamin-A/C; | 0.42                            | 0.04                  | 57.70                | -3.56 |
| VTVTRSYRSV | GGSGGGSFGDNLVTR      | LMNA_HUMAN |             |             | Prelamin-A/C; | 0.38                            | 0.02                  | 71.00                | -2.83 |
| SSVTVTRSYR | SVGGSGGGSFGDNLVTR    | LMNA_HUMAN |             |             | Prelamin-A/C; | 0.28                            | 0.02                  | 99.10                | 0.50  |
| DAENRLQTMK | EELDFQKNIYSEELR      | LMNA_HUMAN |             |             | Prelamin-A/C; | 0.18                            | 0.01                  | 33.50                | 1.16  |

Table S5

| Non-prime  | Prime                    | Id 1       | Id 2 | Id 3 | Protein (Id1)                         | Fold-change (log <sub>2</sub> ) | Fc standard deviation | X! Tandem hyperscore | ppm   |
|------------|--------------------------|------------|------|------|---------------------------------------|---------------------------------|-----------------------|----------------------|-------|
| HHHGHSCSS  | GDPAEYNLR                | LMNA_HUMAN |      |      | Prelamin-A/C;                         | 0.16                            | 0.01                  | 40.60                | -5.05 |
| ARQSAERNSN | LVGAAHEELQQR             | LMNA_HUMAN |      |      | Prelamin-A/C;                         | 0.16                            | 0.01                  | 33.30                | -5.56 |
| LHHHHGSHCS | SSGDPAEYNLR              | LMNA_HUMAN |      |      | Prelamin-A/C;                         | 0.08                            | 0.01                  | 47.20                | -5.17 |
| SLETENAGLR | LRITSEEVVSR              | LMNA_HUMAN |      |      | Prelamin-A/C;                         | 0.06                            | 0.00                  | 36.30                | -1.99 |
| QRRATRSGAQ | ASSTPLSPTR               | LMNA_HUMAN |      |      | Prelamin-A/C;                         | -0.02                           | 0.00                  | 35.20                | 7.61  |
| ASSVTVTRSY | RSVGGSGGSGFDNLVTR        | LMNA_HUMAN |      |      | Prelamin-A/C;                         | -0.02                           | 0.00                  | 44.20                | -1.08 |
| ETPSQRRATR | SGAQASSTPLSPTR           | LMNA_HUMAN |      |      | Prelamin-A/C;                         | -0.02                           | 0.00                  | 67.80                | -1.36 |
| PSQRRATRSG | AQASSTPLSPTR             | LMNA_HUMAN |      |      | Prelamin-A/C;                         | -0.06                           | 0.00                  | 52.10                | -2.97 |
| SAERNLNLVG | AAHEELQQR                | LMNA_HUMAN |      |      | Prelamin-A/C;                         | -0.25                           | 0.01                  | 27.20                | 2.24  |
| CGTCGQPADK | ASASGSGAQVGGPISSGSSASSVT | LMNA_HUMAN |      |      | Prelamin-A/C;                         | -0.47                           | 0.06                  | 118.80               | 0.38  |
| QKQLAAKEAK | LRDLEDLAR                | LMNA_HUMAN |      |      | Prelamin-A/C;                         | -0.47                           | 0.04                  | 33.80                | -0.33 |
| MGNWQIKRQN | GDDPLLYR                 | LMNA_HUMAN |      |      | Prelamin-A/C;                         | -0.66                           | 0.06                  | 31.10                | -3.99 |
| KDLEALLNSK | EAALSTALSEKR             | LMNA_HUMAN |      |      | Prelamin-A/C;                         | -0.76                           | 0.04                  | 23.70                | -0.30 |
| NDRLAVYIDR | VRSLETENAGLR             | LMNA_HUMAN |      |      | Prelamin-A/C;                         | -0.96                           | 0.08                  | 41.90                | 3.91  |
| LETENAGLRL | RITSEEVVSR               | LMNA_HUMAN |      |      | Prelamin-A/C;                         | -1.00                           | 0.10                  | 34.80                | 0.52  |
| PPTDLVWKAQ | NTWGCNSLR                | LMNA_HUMAN |      |      | Prelamin-A/C;                         | -1.12                           | 0.07                  | 23.50                | -0.08 |
| PPRTVSGRYK | STTSVSEEDVSSR            | PAWR_HUMAN |      |      | PRKC apoptosis WT1 regulator protein; | -1.16                           | 0.10                  | 63.50                | -0.99 |

Table S5

| Non-prime  | Prime               | Id 1        | Id 2 | Id 3 | Protein (Id1)                                   | Fold-change (log <sub>2</sub> ) | Fc standard deviation | X! Tandem hyperscore | ppm   |
|------------|---------------------|-------------|------|------|-------------------------------------------------|---------------------------------|-----------------------|----------------------|-------|
| LASLLGAALA | GPVVLGLKECTR        | SAP_HUMAN   |      |      | Proactivator polypeptide;                       | 2.39                            | 0.05                  | 64.60                | -2.46 |
| PRSKPQPKDN | GDVCQDCIQMVTDIQTAVR | SAP_HUMAN   |      |      | Proactivator polypeptide;                       | 0.67                            | 0.04                  | 98.90                | -0.63 |
| GASSTTSTGR | SSQSSSQFSGIGR       | DDX17_HUMAN |      |      | Probable ATP-dependent RNA helicase DDX17;      | 0.20                            | 0.02                  | 63.00                | -2.08 |
| GGGGRSRYR  | TTSSANNPNLMYQDECRR  | DDX17_HUMAN |      |      | Probable ATP-dependent                          | -0.34                           | 0.03                  | 29.30                | 3.29  |
| LREHGEKKKR | SREDAGDNDDEGAIGVR   | DDX47_HUMAN |      |      | Probable ATP-dependent RNA helicase DDX47;      | 0.00                            | 0.00                  | 61.50                | -0.16 |
| DELPKFEKNF | YQEHPDLAR           | DDX5_HUMAN  |      |      | Probable ATP-dependent RNA helicase DDX5;       | 1.20                            | 0.09                  | 28.00                | 1.04  |
| DVEDVKFVIN | YDYPNSSEDIHR        | DDX5_HUMAN  |      |      | Probable ATP-dependent RNA helicase DDX5;       | -0.02                           | 0.00                  | 36.90                | -3.89 |
| EEIMSEKENK | TIVFVETKR           | DDX5_HUMAN  |      |      | Probable ATP-dependent                          | -0.63                           | 0.04                  | 22.90                | 0.43  |
| DKQTQNDLVT | GANLMDIIR           | DDX59_HUMAN |      |      | Probable ATP-dependent                          | 3.65                            | 0.29                  | 33.90                | -2.13 |
|            | M KDSLVLGR          | CIAO1_HUMAN |      |      | Probable cytosolic iron-sulfur protein assembly | 0.69                            | 0.04                  | 36.20                | -0.25 |
| KVNKGIYLKE | EKGVTLIYGR          | GP133_HUMAN |      |      | Probable G-protein coupled receptor 133;        | 1.91                            | 0.09                  | 25.50                | -6.36 |
| APDDYERINR | QLIEAKMALQDR        | AT11C_HUMAN |      |      | Probable phospholipid-                          | 5.56                            | 1.11                  | 39.70                | -2.38 |
| YAVRDTIALC | TAESIDTLR           | AT11C_HUMAN |      |      | Probable phospholipid-transporting ATPase IG;   | 3.27                            | 0.32                  | 33.50                | -0.77 |
| YCLHGQCIYL | VDMSQNYCR           | EREG_HUMAN  |      |      | Proopiregulin;                                  | 1.52                            | 0.13                  | 23.60                | -4.99 |
| LGGQKCSVIR | DSLLQDGEFSMDLR      | PROF1_HUMAN |      |      | Profilin-1;                                     | 6.80                            | 0.45                  | 81.00                | -0.30 |
| EVGVLVGKDR | SSFYVNGLTLGGQKCSVIR | PROF1_HUMAN |      |      | Profilin-1;                                     | 3.32                            | 0.28                  | 35.10                | -1.17 |
| GVHGGLINKK | CYEMASHLR           | PROF1_HUMAN |      |      | Profilin-1;                                     | 2.50                            | 0.15                  | 38.60                | -2.01 |
| PSVWAAVPGK | TFVNITPAEVLVGKDR    | PROF1_HUMAN |      |      | Profilin-1;                                     | 2.36                            | 0.05                  | 31.30                | -0.66 |

Table S5

| Non-prime  | Prime                | Id 1        | Id 2 | Id 3 | Protein (Id1)                                              | Fold-change (log <sub>2</sub> ) | Fc standard deviation | X! Tandem hyperscore | ppm   |
|------------|----------------------|-------------|------|------|------------------------------------------------------------|---------------------------------|-----------------------|----------------------|-------|
| GDCTMDIRTK | SQGGPEPTYNVAVGR      | PROF2_HUMAN |      |      | Profilin-2;                                                | -0.25                           | 0.01                  | 55.00                | -3.62 |
| SAPSIPTPAY | QSSPAGGHAPTPTPAPR    | PDC6I_HUMAN |      |      | Programmed cell death 6-                                   | 0.69                            | 0.03                  | 30.50                | 1.82  |
| APSIPTPAYQ | SSPAGGHAPTPTPAPR     | PDC6I_HUMAN |      |      | Programmed cell death 6-                                   | 0.61                            | 0.02                  | 36.30                | -1.90 |
| EAKHREAEMR | NSILAQVLDQSAR        | PDCD5_HUMAN |      |      | Programmed cell death protein 5;                           | 4.42                            | 0.68                  | 64.20                | -2.70 |
| LGGGRDRKVR | DLQEADLDLLR          | HBEGF_HUMAN |      |      | Proheparin-binding EGF-                                    | 0.44                            | 0.04                  | 43.70                | -0.08 |
| MKVLRAWL   | LCLLMLGLALR          | PRRP_HUMAN  |      |      | Prolactin-releasing peptide;                               | 0.06                            | 0.01                  | 26.30                | -1.46 |
| SGPFEPDLYK | SEMEVQDAELKALLQSSASR | PA2G4_HUMAN |      |      | Proliferation-associated protein 2G4;                      | 0.40                            | 0.02                  | 47.30                | -1.42 |
| FIANVAHTFV | VDVAQGTQVTGR         | PA2G4_HUMAN |      |      | Proliferation-associated protein 2G4;                      | -0.47                           | 0.03                  | 43.60                | -0.24 |
| VQQAVARRPR | DLPAIQPR             | PROSC_HUMAN |      |      | Proline synthase co-transcribed bacterial homolog protein; | 0.41                            | 0.01                  | 34.50                | -1.48 |
| SLAAVLLAVY | YGLIWPTR             | PRR24_HUMAN |      |      | Proline-rich protein 24;                                   | 0.06                            | 0.00                  | 29.50                | -0.97 |
| YFSYSHLVCV | TAIEEVQAER           | P3H1_HUMAN  |      |      | Prolyl 3-hydroxylase 1;                                    | 0.13                            | 0.01                  | 30.30                | -2.47 |
| CEGGHVLHHG | VCQENCPER            | PCSK5_HUMAN |      |      | Proprotein convertase subtilisin/kexin type 5;             | 5.23                            | 0.26                  | 29.60                | -1.23 |
| THLAGVVSGR | DAGVAKGASMR          | PCSK9_HUMAN |      |      | Proprotein convertase subtilisin/kexin type 9;             | 7.08                            | 1.35                  | 21.00                | -2.32 |
| PTRMATAVAR | CAPDEELLSCSSFSR      | PCSK9_HUMAN |      |      | Proprotein convertase subtilisin/kexin type 9;             | 5.02                            | 0.36                  | 77.00                | -0.78 |
| QSDHREIEGR | VMVTDNFENVPEEDGTR    | PCSK9_HUMAN |      |      | Proprotein convertase subtilisin/kexin type 9;             | 4.80                            | 0.27                  | 63.90                | 0.64  |
| EAQGGKLVCR | AHNAFGGEGVYAIAR      | PCSK9_HUMAN |      |      | Proprotein convertase subtilisin/kexin type 9;             | 4.70                            | 0.54                  | 89.70                | -0.83 |
| RQRLIHFSAK | DVINEAWFPEDQR        | PCSK9_HUMAN |      |      | Proprotein convertase subtilisin/kexin type 9;             | 0.24                            | 0.01                  | 44.00                | -7.16 |

Table S5

| Non-prime  | Prime                     | Id 1        | Id 2 | Id 3 | Protein (Id1)                                  | Fold-change (log <sub>2</sub> ) | Fc standard deviation | X! Tandem hyperscore | ppm   |
|------------|---------------------------|-------------|------|------|------------------------------------------------|---------------------------------|-----------------------|----------------------|-------|
| AAHVAGIAAM | MLSAEPELTLAELR            | PCSK9_HUMAN |      |      | Proprotein convertase subtilisin/kexin type 9; | -0.66                           | 0.03                  | 36.70                | 0.56  |
| VAGIAAMMLS | APELTLAELR                | PCSK9_HUMAN |      |      | Proprotein convertase subtilisin/kexin type 9; | -0.93                           | 0.04                  | 32.10                | -2.04 |
| AHVAGIAAMM | LSAEPELTLAELR             | PCSK9_HUMAN |      |      | Proprotein convertase subtilisin/kexin type 9; | -0.96                           | 0.04                  | 48.50                | -1.22 |
| SQLVQPVGPL | VVLLPLAGGYSR              | PCSK9_HUMAN |      |      | Proprotein convertase subtilisin/kexin type 9; | -1.04                           | 0.06                  | 34.10                | -1.25 |
| VITVGATNAQ | DQPVTLTGTLGTNFR           | PCSK9_HUMAN |      |      | Proprotein convertase subtilisin/kexin type 9; | -1.08                           | 0.09                  | 63.80                | -1.24 |
| LIHFSAKDVI | NEAWFPEDQR                | PCSK9_HUMAN |      |      | Proprotein convertase subtilisin/kexin type 9; | -1.08                           | 0.09                  | 32.70                | -1.66 |
| RCCLLPQANC | SVHTAPPAEASMGTR           | PCSK9_HUMAN |      |      | Proprotein convertase subtilisin/kexin type 9; | -1.20                           | 0.08                  | 27.70                | -2.97 |
| CLYSPASAPE | VITVGATNAQDQPVTLTGTLGTNFG | PCSK9_HUMAN |      |      | Proprotein convertase subtilisin/kexin type 9; | -1.20                           | 0.11                  | 46.10                | -0.97 |
| LEFIRKSQLV | QPVGPLVVLLPLAGGYSR        | PCSK9_HUMAN |      |      | Proprotein convertase subtilisin/kexin type 9; | -1.39                           | 0.15                  | 56.10                | -2.24 |
| GLEFIRKSQL | VQPVGPLVVLLPLAGGYSR       | PCSK9_HUMAN |      |      | Proprotein convertase subtilisin/kexin type 9; | -1.39                           | 0.15                  | 68.40                | -3.76 |
| LNCQKGTVS  | GTLIGLEFIR                | PCSK9_HUMAN |      |      | Proprotein convertase subtilisin/kexin type 9; | -1.44                           | 0.12                  | 36.90                | -4.59 |
| KSQLVQVGP  | LVVLLPLAGGYSR             | PCSK9_HUMAN |      |      | Proprotein convertase subtilisin/kexin type 9; | -1.86                           | 0.07                  | 36.40                | -0.72 |
| QLLRVWGAPR | NSDPALGLDDDPDAPAAQLAR     | PCSK1_HUMAN |      |      | ProSAAS;                                       | 5.80                            | 0.70                  | 99.10                | 3.63  |
| PELLRYLLGR | ILAGSADSEGVAAPR           | PCSK1_HUMAN |      |      | ProSAAS;                                       | 4.19                            | 0.40                  | 71.10                | -0.69 |
| AAGAVQELAR | ALAHLLAER                 | PCSK1_HUMAN |      |      | ProSAAS;                                       | 2.63                            | 0.16                  | 30.90                | 2.17  |
| PRRFRRSVPR | GAAAGAVQELAR              | PCSK1_HUMAN |      |      | ProSAAS;                                       | 2.32                            | 0.13                  | 60.00                | -1.92 |

Table S5

| Non-prime   | Prime                  | Id 1        | Id 2       | Id 3 | Protein (Id1)                         | Fold-change (log <sub>2</sub> ) | Fc standard deviation | X! Tandem hyperscore | ppm   |
|-------------|------------------------|-------------|------------|------|---------------------------------------|---------------------------------|-----------------------|----------------------|-------|
| AAPRRRLRAA  | DHDVGSSELPPEGVLGALLR   | PCSK1_HUMAN |            |      | ProSAAS;                              | 1.31                            | 0.08                  | 59.40                | -2.05 |
| VKEPRGLSAA  | SPPLAETGAPR            | PCSK1_HUMAN |            |      | ProSAAS;                              | 1.28                            | 0.08                  | 35.50                | -2.76 |
| PVKEPRGLSA  | ASPPLAETGAPR           | PCSK1_HUMAN |            |      | ProSAAS;                              | 1.11                            | 0.03                  | 31.10                | 1.00  |
| GVAAPRRRLRR | AADHDVGSSELPPEGVLGALLR | PCSK1_HUMAN |            |      | ProSAAS;                              | 1.09                            | 0.01                  | 73.70                | -2.61 |
| RRLRRAADHD  | VGSSELPPEGVLGALLR      | PCSK1_HUMAN |            |      | ProSAAS;                              | 1.02                            | 0.11                  | 40.30                | -1.40 |
| ETGAPRRFR   | SVPRGEAAGAVQELAR       | PCSK1_HUMAN |            |      | ProSAAS;                              | 0.90                            | 0.03                  | 65.10                | -1.34 |
| LLRVWGAPRN  | SDPALGLDDDDPDAPAAQLAR  | PCSK1_HUMAN |            |      | ProSAAS;                              | 0.87                            | 0.08                  | 90.20                | 2.21  |
| RNSDPALGLD  | DDPDAPAAQLAR           | PCSK1_HUMAN |            |      | ProSAAS;                              | -0.14                           | 0.01                  | 31.90                | 0.00  |
| VDFNNWKDWE  | DDSDEDMNSNFR           | TEBP_HUMAN  |            |      | Prostaglandin E synthase 3;           | 0.40                            | 0.04                  | 52.10                | 4.14  |
| GVLGDLQAAP  | EAQVSVQPNFQQDKFLGR     | PTGDS_HUMAN |            |      | Prostaglandin-H2 D-isomerase;         | 4.31                            | 0.45                  | 30.20                | 0.74  |
| LLGVLGDLQA  | APEAQVSVQPNFQQDKFLGR   | PTGDS_HUMAN |            |      | Prostaglandin-H2 D-isomerase;         | 3.47                            | 0.17                  | 38.00                | -1.90 |
| PGSSSSSSSR  | SQSAAVTPSSTTSSTR       | ADRM1_HUMAN |            |      | Proteasomal ubiquitin receptor ADRM1; | 0.88                            | 0.03                  | 55.70                | -0.63 |
| RARVECQSHR  | LTVEDPVTVEYITR         | PSA7L_HUMAN | PSA7_HUMAN |      | Proteasome subunit alpha type-7-like; | 3.73                            | 0.39                  | 39.40                | -4.21 |
| KICALDDNVC  | MAFAGLTADAR            | PSA7_HUMAN  |            |      | Proteasome subunit alpha type-7;      | -1.66                           | 0.05                  | 29.60                | -1.29 |
| GYVDMLGVAY  | EAPSLATGYGAYLAQPLLR    | PSB4_HUMAN  |            |      | Proteasome subunit beta               | -0.37                           | 0.04                  | 43.90                | -0.69 |
| EEPGIEMLHG  | TTTLAFKFR              | PSB5_HUMAN  |            |      | Proteasome subunit beta               | 0.29                            | 0.02                  | 16.90                | 0.09  |
| YKLPKVRKTG  | TTIAGVVYKDGIVLGADTR    | PSB7_HUMAN  |            |      | Proteasome subunit beta               | 0.67                            | 0.04                  | 63.90                | -1.14 |
| GQATAADQEK  | NPEGDGLLESTFNFWR       | AF1Q_HUMAN  |            |      | Protein AF1q;                         | -6.27                           | 0.00                  | 40.70                | -3.80 |
| QRRRKFLNLR  | FRTGSGQGPSSTGQPGR      | AHNK2_HUMAN |            |      | Protein AHNAK2;                       | 2.21                            | 0.22                  | 51.70                | -5.04 |

Table S5

| Non-prime  | Prime                   | Id 1        | Id 2 | Id 3 | Protein (Id1)                                     | Fold-change (log <sub>2</sub> ) | Fc standard deviation | X! Tandem hyperscore | ppm   |
|------------|-------------------------|-------------|------|------|---------------------------------------------------|---------------------------------|-----------------------|----------------------|-------|
| PRAQPTPGMS | REGEGEGLQSLEIGIAR       | AHNK2_HUMAN |      |      | Protein AHNAK2;                                   | 1.93                            | 0.10                  | 40.60                | 0.00  |
| QSVVEVPYAR | SEAHLTELEEICDR          | CNPY2_HUMAN |      |      | Protein canopy homolog 2;                         | 0.16                            | 0.00                  | 33.10                | -0.76 |
| LPSKCEVCKL | LSTELQAELSR             | CNPY4_HUMAN |      |      | Protein canopy homolog 4;                         | 1.21                            | 0.05                  | 40.10                | -3.14 |
| FLVALIWCY  | LREESEADQWLR            | CSMT1_HUMAN |      |      | Protein CCSMST1;                                  | 0.84                            | 0.05                  | 49.10                | -1.79 |
| CFLVALIWC  | YLREESEADQWLR           | CSMT1_HUMAN |      |      | Protein CCSMST1;                                  | 0.24                            | 0.01                  | 35.90                | -0.70 |
| EDSEVLMMIK | TQSSLVPALDFVR           | CUTA_HUMAN  |      |      | Protein CutA;                                     | 2.72                            | 0.07                  | 46.80                | -1.54 |
| IAVGKGSSLK | RLPVFGMEPR              | CYR61_HUMAN |      |      | Protein CYR61;                                    | -1.49                           | 0.04                  | 51.20                | -0.89 |
| MEDQDGLLGK | ELGFDASEVELTR           | CYR61_HUMAN |      |      | Protein CYR61;                                    | -1.55                           | 0.14                  | 48.40                | -2.67 |
| LLHLTRLALS | TCPAACHCPLEAPKCAPGVGLVR | CYR61_HUMAN |      |      | Protein CYR61;                                    | -1.79                           | 0.06                  | 38.40                | -2.35 |
| ASKVSAQILK | SNLASMEQQIVHLER         | DIAP2_HUMAN |      |      | Protein diaphanous homolog 2;                     | 0.13                            | 0.01                  | 35.40                | 1.23  |
| FAPWCGHCKR | LAPEYEAAAATR            | PDIA3_HUMAN |      |      | Protein disulfide-Protein disulfide-isomerase A3; | 4.93                            | 0.57                  | 44.20                | -1.56 |
| SGYPTLKIFR | DGEEAGAYDGPR            | PDIA3_HUMAN |      |      | Protein disulfide-Protein disulfide-isomerase A3; | 2.22                            | 0.09                  | 44.90                | -0.16 |
| SRKTFSHEL  | DFGLESTAGEIPVVAIR       | PDIA3_HUMAN |      |      | Protein disulfide-Protein disulfide-isomerase A3; | 0.90                            | 0.09                  | 40.10                | 1.05  |
| LLAAARLAAA | SDVLELTDDNFESR          | PDIA3_HUMAN |      |      | Protein disulfide-Protein disulfide-isomerase A3; | 0.06                            | 0.01                  | 85.40                | -1.56 |
| NRPEDYQGGR | TGEAIVDAALSALR          | PDIA6_HUMAN |      |      | Protein disulfide-Protein disulfide-isomerase A6; | 3.54                            | 0.48                  | 63.40                | -0.64 |
| ARKMKFALLK | GSFSEQGINEFLR           | PDIA6_HUMAN |      |      | Protein disulfide-Protein disulfide-isomerase A6; | 0.74                            | 0.03                  | 71.60                | -2.83 |
| SCTFFLAVNG | LYSSSDDVIELTPSNFNR      | PDIA6_HUMAN |      |      | Protein disulfide-Protein disulfide-isomerase A6; | 0.11                            | 0.01                  | 76.60                | -0.05 |
| CLAVAALVRA | DAPEEEDHVLVLR           | PDIA1_HUMAN |      |      | Protein disulfide-isomerase;                      | 0.45                            | 0.00                  | 40.00                | -1.68 |
| KLKAEGSEIR | LAKVDATEESDLAQQYGVR     | PDIA1_HUMAN |      |      | Protein disulfide-isomerase;                      | -1.34                           | 0.10                  | 41.70                | -0.98 |
| YTYSENRVEK | DGLILTSR                | PARK7_HUMAN |      |      | Protein DJ-1;                                     | 4.23                            | 0.51                  | 30.00                | -4.32 |
| M          | AVTGWLESLR              | DPCD_HUMAN  |      |      | Protein DPCD;                                     | -0.39                           | 0.01                  | 43.20                | 1.11  |



Table S5

| Non-prime  | Prime                     | Id 1        | Id 2 | Id 3 | Protein (Id1)                                 | Fold-change (log <sub>2</sub> ) | Fc standard deviation | X! Tandem hyperscore | ppm   |
|------------|---------------------------|-------------|------|------|-----------------------------------------------|---------------------------------|-----------------------|----------------------|-------|
| EQMLEGQTQV | AENPHSEYGLTDNVER          | DPY30_HUMAN |      |      | Protein dpy-30 homolog;                       | 0.59                            | 0.06                  | 45.20                | -3.22 |
| LLSLGRFVRG | DGVGGDPAVALPHR            | LMAN1_HUMAN |      |      | Protein ERGIC-53;                             | -0.37                           | 0.01                  | 70.50                | -1.79 |
| YVISQVFEIK | MDASLGNLFAR               | FAM3C_HUMAN |      |      | Protein FAM3C;                                | 0.28                            | 0.02                  | 48.10                | -1.88 |
| VISQVFEIKM | DASLGNLFAR                | FAM3C_HUMAN |      |      | Protein FAM3C;                                | 0.13                            | 0.01                  | 50.80                | -4.37 |
| LLFHPPRAHL | LTIKETIR                  | FA83B_HUMAN |      |      | Protein FAM83B;                               | 7.55                            | 1.37                  | 25.90                | -6.60 |
| RDAEKKDQMK | ADLTALFLPR                | FLII_HUMAN  |      |      | Protein flightless-1                          | -0.47                           | 0.03                  | 44.50                | 0.09  |
| SLESQPPPLQ | TQACPESSCLR               | HEX11_HUMAN |      |      | Protein HEXIM1;                               | 0.73                            | 0.04                  | 26.00                | -6.43 |
| WQSRAFPQLG | GRPGPEGEGSLESQPPPLQTQACPE | HEX11_HUMAN |      |      | Protein HEXIM1;                               | 0.09                            | 0.01                  | 49.30                | -2.82 |
| GATPVQDERD | SGSDGEDDVNEQHSGSDTGSVER   | IWS1_HUMAN  |      |      | Protein IWS1 homolog;                         | 1.08                            | 0.13                  | 49.80                | 0.00  |
| PSASMTRLMR | SRTASGSSVTSLDGTR          | NDRG1_HUMAN |      |      | Protein NDRG1;                                | -0.82                           | 0.09                  | 39.90                | -2.23 |
| LLLPASLTGG | VGSLNLEELSEMR             | OS9_HUMAN   |      |      | Protein OS-9;                                 | 0.04                            | 0.00                  | 58.40                | -2.05 |
| QKSLLSSTST | TTKITTGSSSAGTQSSTSNR      | MYPT1_HUMAN |      |      | Protein phosphatase 1 regulatory subunit 12A; | 2.01                            | 0.30                  | 47.30                | 4.38  |
| SLSTMSSSLY | ASSQLNRPNLSLVGITSAYS      | MYPT1_HUMAN |      |      | Protein phosphatase 1 regulatory subunit 12A; | -0.14                           | 0.01                  | 53.90                | -1.99 |
| GGPGPRVYFQ | SPPGAAGEGPGGADDEGPVRR     | PP14B_HUMAN |      |      | Protein phosphatase 1                         | 1.89                            | 0.12                  | 37.20                | 1.06  |
| SGGPGPRVYF | QSPGAAGEGPGGADDEGPVRR     | PP14B_HUMAN |      |      | Protein phosphatase 1 regulatory subunit 14B; | 1.35                            | 0.07                  | 44.50                | -1.47 |
| EAALLHEEAT | MTIEELLTR                 | PPM1G_HUMAN |      |      | Protein phosphatase 1G;                       | 0.44                            | 0.02                  | 26.30                | -0.09 |
| VSKKASPEAA | STPRDPIDVDLPEEAER         | PML_HUMAN   |      |      | Protein PML;                                  | 0.00                            | 0.00                  | 45.90                | -0.76 |
| KNLDSGHCV  | EPSSSGQR                  | PRC2A_HUMAN |      |      | Protein PRRC2A;                               | -3.08                           | 0.26                  | 27.80                | -5.89 |

Table S5

| Non-prime  | Prime                 | Id 1        | Id 2 | Id 3 | Protein (Id1)                       | Fold-change (log <sub>2</sub> ) | Fc standard deviation | X! Tandem hyperscore | ppm   |
|------------|-----------------------|-------------|------|------|-------------------------------------|---------------------------------|-----------------------|----------------------|-------|
| NKYVQQEKQN | TASLSK                | PRUNE_HUMAN |      |      | Protein prune homolog;              | 3.42                            | 0.29                  | 10.20                | -7.20 |
| RELPSFLGKR | TDEAAFQKLMSNLDSNR     | S10A4_HUMAN |      |      | Protein S100-A4;                    | 1.89                            | 0.07                  | 34.10                | -2.70 |
| QALHLRSWLL | SRQGAETGGQGQPQGPGLR   | SCO2_HUMAN  |      |      | Protein SCO2 homolog,               | 0.64                            | 0.04                  | 53.40                | -2.29 |
| PPSRVSVIQF | LEAPIGDEDAEEAAAEKR    | SCRIB_HUMAN |      |      | Protein scribble homolog;           | 0.97                            | 0.11                  | 34.50                | -2.33 |
| DEEALHYLTR | VEVTEFEDIKSGYR        | SET_HUMAN   |      |      | Protein SET;                        | 1.13                            | 0.16                  | 38.80                | -2.54 |
| TTFVNHPQVS | ALLGEEDEEALHYLTR      | SET_HUMAN   |      |      | Protein SET;                        | -1.04                           | 0.06                  | 56.40                | -1.32 |
| HPQVSALLGE | EDEEALHYLTR           | SET_HUMAN   |      |      | Protein SET;                        | -1.08                           | 0.07                  | 30.00                | -0.14 |
| FVNHPQVSAL | LGEEDEEALHYLTR        | SET_HUMAN   |      |      | Protein SET;                        | -1.39                           | 0.11                  | 45.10                | -0.29 |
| KDMERLTSLR | AGIEGPLLASDVGR        | SON_HUMAN   |      |      | Protein SON;                        | -0.02                           | 0.00                  | 42.70                | -5.32 |
| DRKKLYSLLG | IDLTAPSNNSPR          | SBNO1_HUMAN |      |      | Protein strawberry notch homolog 1; | 1.89                            | 0.12                  | 26.50                | -3.50 |
| NQDEINKNVM | SAFGLTDDQVSGPPSAPAEDR | TFG_HUMAN   |      |      | Protein TFG;                        | 1.18                            | 0.21                  | 104.20               | -1.07 |
| INKNVMSAFG | LTDDQVSGPPSAPAEDR     | TFG_HUMAN   |      |      | Protein TFG;                        | 0.98                            | 0.09                  | 90.00                | 0.73  |
| KNVMSAFGLT | DDQVSGPPSAPAEDR       | TFG_HUMAN   |      |      | Protein TFG;                        | 0.74                            | 0.06                  | 55.10                | -3.31 |
| EINKNVMSAF | GLTDDQVSGPPSAPAEDR    | TFG_HUMAN   |      |      | Protein TFG;                        | 0.41                            | 0.04                  | 86.10                | 0.60  |
| QDEINKNVMS | AFGLTDDQVSGPPSAPAEDR  | TFG_HUMAN   |      |      | Protein TFG;                        | 0.20                            | 0.02                  | 50.50                | -2.48 |
| SAFGLTDDQV | SGPPSAPAEDR           | TFG_HUMAN   |      |      | Protein TFG;                        | 0.16                            | 0.01                  | 34.60                | 0.45  |
| EHTGAIDVLS | ADLESADLLGDHR         | TMED8_HUMAN |      |      | Protein TMED8;                      | -0.04                           | 0.00                  | 37.10                | -2.15 |
| PIPDEHLILK | TTFEDLIQR             | SC31A_HUMAN |      |      | Protein transport protein Sec31A;   | 0.38                            | 0.01                  | 33.90                | -2.59 |
| NIPPIQRVPR | DIPAMLPAAR            | YIPF3_HUMAN |      |      | Protein YIPF3;                      | -0.93                           | 0.02                  | 34.90                | -2.57 |
| PLQLCALVHC | APPAAGQQPPREPPAAPGAWR | LYOX_HUMAN  |      |      | Protein-lysine 6-oxidase;           | 2.51                            | 0.10                  | 44.80                | -1.80 |

Table S5

| Non-prime  | Prime                   | Id 1        | Id 2        | Id 3       | Protein (Id1)                                              | Fold-change (log <sub>2</sub> ) | Fc standard deviation | X! Tandem hyperscore | ppm   |
|------------|-------------------------|-------------|-------------|------------|------------------------------------------------------------|---------------------------------|-----------------------|----------------------|-------|
| MSPWQVMLFR | KSPQELLCGASLISDR        | THRB_HUMAN  |             |            | Prothrombin;                                               | 0.32                            | 0.01                  | 50.90                | -1.25 |
| SPWQVMLFRK | SPQELLCGASLISDR         | THRB_HUMAN  |             |            | Prothrombin;                                               | 0.08                            | 0.00                  | 76.30                | -7.26 |
| FPQSIDVLES | VPINTPLAR               | FAT2_HUMAN  |             |            | Protocadherin Fat 2;                                       | 5.27                            | 0.50                  | 14.60                | -3.27 |
| VEDEDEAGLQ | KSLKFNLMSDAPGDSR        | PCDH1_HUMAN |             |            | Protocadherin-1;                                           | 6.43                            | 1.15                  | 34.40                | -9.95 |
| ILLNAAWLKR | DAESIHQYLLQR            | PSA_HUMAN   |             |            | Puromycin-sensitive aminopeptidase;                        | 2.33                            | 0.20                  | 39.50                | -0.20 |
| EMAMAASSSS | VEKSYELPDGQVITIGNER     | ACTBM_HUMAN |             |            | Putative beta-actin-like                                   | 1.96                            | 0.11                  | 49.40                | -2.58 |
| DSEQEMAMAA | SSSSVEKSYELPDGQVITIGNER | ACTBM_HUMAN |             |            | Putative beta-actin-like protein 3;                        | 1.33                            | 0.09                  | 47.00                | 3.68  |
|            | MAGGEAGVTLGQPILSR       | IF2GL_HUMAN | IF2G_HUMAN  |            | Putative eukaryotic                                        | 0.41                            | 0.03                  | 44.60                | -1.51 |
| SIYYITGESK | EQVANSAFVER             | H90B3_HUMAN | HS90B_HUMAN |            | Putative heat shock protein HSP 90-beta-3;                 | 0.92                            | 0.06                  | 38.60                | -3.99 |
| PADSKPGTIR | GDFCIQVGR               | NDK8_HUMAN  | NDKA_HUMAN  | NDKB_HUMAN | Putative nucleoside diphosphate kinase;                    | 2.53                            | 0.15                  | 45.00                | -3.24 |
| MNSGPVVAMV | WEGLNVVKTGR             | NDK8_HUMAN  | NDKA_HUMAN  | NDKB_HUMAN | Putative nucleoside diphosphate kinase;                    | -1.25                           | 0.09                  | 19.00                | -2.26 |
| LTVAWILGTF | YYLWQDNR                | GLTL1_HUMAN |             |            | Putative polypeptide N-acetylgalactosaminyltrans           | -0.79                           | 0.05                  | 33.30                | -1.94 |
| FEKAAFQKQN | DTPKGPQPPTVSPR          | NOP2_HUMAN  |             |            | Putative ribosomal RNA methyltransferase NOP2;             | 0.82                            | 0.03                  | 29.20                | -3.03 |
| RSRGGFGITF | TNPEHASVAMR             | RBM3_HUMAN  |             |            | Putative RNA-binding                                       | 0.09                            | 0.00                  | 33.20                | -3.46 |
| AGSDLRRRRR | DLGPHAEGQLAPR           | S38AA_HUMAN |             |            | Putative sodium-coupled neutral amino acid transporter 10; | 1.24                            | 0.10                  | 48.00                | -1.87 |
| EGLMKVEAAR | LSAQDPVVVAEDGR          | S38AA_HUMAN |             |            | Putative sodium-coupled neutral amino acid                 | 0.73                            | 0.03                  | 55.00                | 2.69  |
| EPFPTMQKTP | TQPPELR                 | YQ024_HUMAN |             |            | Putative uncharacterized protein FLJ43826;                 | 7.29                            | 0.83                  | 21.10                | -0.69 |
| SARNSRMFGH | LSPVRIPHLR              | YA034_HUMAN | YI024_HUMAN |            | Putative UPF0607 protein ENSP00000383783;                  | -0.29                           | 0.01                  | 25.50                | -4.02 |
| HEGQHPAQLR | SDVCTPGGTTIYGLHALEQGGLR | P5CR3_HUMAN |             |            | Pyrroline-5-carboxylate                                    | -0.06                           | 0.00                  | 35.80                | 0.53  |

Table S5

| Non-prime  | Prime                  | Id 1        | Id 2       | Id 3 | Protein (Id1)                          | Fold-change (log <sub>2</sub> ) | Fc standard deviation | X! Tandem hyperscore | ppm   |
|------------|------------------------|-------------|------------|------|----------------------------------------|---------------------------------|-----------------------|----------------------|-------|
| AHQVARYRPR | APIIAVTR               | KPYM_HUMAN  |            |      | Pyruvate kinase isozymes               | 10.36                           | 0.00                  | 37.20                | -2.42 |
| ADTFLEHMCR | LDIDSPITAR             | KPYM_HUMAN  |            |      | Pyruvate kinase isozymes               | 5.45                            | 0.30                  | 56.30                | -1.14 |
| DIDSPITAR  | NTGIICTIGPASR          | KPYM_HUMAN  |            |      | Pyruvate kinase isozymes M1/M2;        | 2.95                            | 0.22                  | 60.90                | -4.25 |
| PVLCKDPVQE | AWAEDVDLR              | KPYM_HUMAN  |            |      | Pyruvate kinase isozymes M1/M2;        | 2.27                            | 0.18                  | 36.90                | -2.61 |
| FIQTQQLHAA | MADTFLEHMCR            | KPYM_HUMAN  |            |      | Pyruvate kinase isozymes               | 0.75                            | 0.06                  | 29.30                | -3.89 |
| TAFIQTQQLH | AAMADTFLEHMCR          | KPYM_HUMAN  |            |      | Pyruvate kinase isozymes M1/M2;        | 0.59                            | 0.04                  | 44.60                | -1.58 |
| QTQQLHAAMA | DTFLEHMCR              | KPYM_HUMAN  |            |      | Pyruvate kinase isozymes M1/M2;        | 0.02                            | 0.00                  | 25.60                | -1.45 |
| DLKFGVEQDV | DMVFASFIR              | KPYM_HUMAN  |            |      | Pyruvate kinase isozymes M1/M2;        | -0.79                           | 0.03                  | 24.60                | -0.71 |
| IENHEGVRRF | DEILEASDGIMVAR         | KPYM_HUMAN  |            |      | Pyruvate kinase isozymes M1/M2;        | -0.82                           | 0.04                  | 68.50                | -2.19 |
| DTFLEHMCRL | DIDSPITAR              | KPYM_HUMAN  |            |      | Pyruvate kinase isozymes M1/M2;        | -1.12                           | 0.05                  | 22.80                | -2.95 |
| GAVEASFKCC | SGAIIVLTKSGR           | KPYM_HUMAN  |            |      | Pyruvate kinase isozymes M1/M2;        | -1.49                           | 0.13                  | 29.50                | 3.22  |
| VYKKFDLGQD | VIDFTGHALALYR          | GDIA_HUMAN  | GDIB_HUMAN |      | Rab GDP dissociation                   | -0.25                           | 0.02                  | 26.70                | 0.99  |
| DVYKKFDLGQ | DVIDFTGHALALYR         | GDIA_HUMAN  | GDIB_HUMAN |      | Rab GDP dissociation inhibitor alpha;  | -3.08                           | 0.26                  | 33.60                | -0.12 |
| FTGHALALYR | TDDYLDQPCYETINR        | GDIB_HUMAN  |            |      | Rab GDP dissociation inhibitor beta;   | 4.49                            | 0.52                  | 71.50                | 0.93  |
| VSISDLLVPK | DLGTESQIFISR           | GDIB_HUMAN  |            |      | Rab GDP dissociation inhibitor beta;   | 3.38                            | 0.23                  | 48.40                | 2.94  |
| EEEIKIPVVC | ALTQEESSAQLSNEEEHLDSTR | RABE1_HUMAN |            |      | Rab GTPase-binding effector protein 1; | 0.47                            | 0.04                  | 59.90                | 0.04  |
| IAAQMLSFVM | DDPDFESEGSQTQR         | PARF_HUMAN  |            |      | Rab-like protein 6;                    | 0.47                            | 0.03                  | 48.30                | -0.80 |
| QDQTTVRTVA | SATTAIEIR              | REPS1_HUMAN |            |      | RalBP1-associated Eps                  | -0.52                           | 0.02                  | 26.50                | -0.90 |
| LALKVAVAGR | NRLNDGATALAEAFR        | RAGP1_HUMAN |            |      | Ran GTPase-activating                  | 2.21                            | 0.14                  | 33.10                | -2.70 |
| SDRAWVWNTH | ADFADECPPELLAIR        | RANG_HUMAN  |            |      | Ran-specific GTPase-                   | 1.24                            | 0.08                  | 32.70                | -3.34 |

Table S5

| Non-prime  | Prime                   | Id 1        | Id 2        | Id 3       | Protein (Id1)                                    | Fold-change (log <sub>2</sub> ) | Fc standard deviation | X! Tandem hyperscore | ppm   |
|------------|-------------------------|-------------|-------------|------------|--------------------------------------------------|---------------------------------|-----------------------|----------------------|-------|
| KMRAKLFRFA | SENDLPEWKER             | RANG_HUMAN  |             |            | Ran-specific GTPase-activating protein;          | 0.49                            | 0.03                  | 27.60                | 2.24  |
| LFKMRAKLFR | FASENDLPEWKER           | RANG_HUMAN  |             |            | Ran-specific GTPase-activating protein;          | 0.40                            | 0.03                  | 33.70                | -2.50 |
| EETAPEDAQK | SSSPAPADIAQTVQEDLR      | G3BP1_HUMAN |             |            | Ras GTPase-activating protein-binding protein 1; | 1.20                            | 0.10                  | 78.80                | -2.76 |
| NIPPQRGPRP | IREAGEQGDIEPR           | G3BP1_HUMAN |             |            | Ras GTPase-activating protein-binding protein 1; | 1.03                            | 0.10                  | 44.60                | -1.73 |
| TAPEDAQKSS | SPAPADIAQTVQEDLR        | G3BP1_HUMAN |             |            | Ras GTPase-activating protein-binding protein 1; | 0.96                            | 0.08                  | 75.70                | 1.44  |
| PPQRGPRPIR | EAGEQGDIEPR             | G3BP1_HUMAN |             |            | Ras GTPase-activating protein-binding protein 1; | -0.27                           | 0.03                  | 47.50                | -1.22 |
| FVQGIFVEKY | DPTIEDSYR               | RAP1A_HUMAN | RAP1B_HUMAN | RASH_HUMAN | Ras-related protein Rap-1A;                      | -0.32                           | 0.01                  | 28.70                | -5.40 |
| SGISIGSSDG | SELSEETSWPAFER          | RGPS2_HUMAN |             |            | Ras-specific guanine                             | -1.72                           | 0.23                  | 19.30                | 0.23  |
| TKEDEMPVGR | NVLELSNVVR              | PTPRF_HUMAN |             |            | Receptor-type tyrosine-protein phosphatase F;    | 4.13                            | 0.35                  | 34.20                | -1.02 |
| KWTEYRVVVR | AHTDVGPGPESSPVLVR       | PTPRF_HUMAN |             |            | Receptor-type tyrosine-protein phosphatase F;    | 1.74                            | 0.06                  | 30.40                | -6.81 |
| PVTTYGIQYR | AAGTEGPFQEVDGVATTR      | PTPRF_HUMAN |             |            | Receptor-type tyrosine-protein phosphatase F;    | -0.44                           | 0.01                  | 48.10                | -4.90 |
| LTEELIKALQ | DLENAASGDATVR           | RPR1B_HUMAN |             |            | Regulation of nuclear pre-                       | 3.37                            | 0.18                  | 31.10                | 0.67  |
| DPGRHVMLLR | AVPGGAGDASVLPSPR        | RMD3_HUMAN  |             |            | Regulator of microtubule                         | -0.04                           | 0.00                  | 31.00                | -3.00 |
| LYCLLRREPR | QALAGTFR                | RL3R2_HUMAN |             |            | Relaxin-3 receptor 2;                            | 3.23                            | 0.15                  | 26.90                | -3.59 |
| LLALVAGVLG | NEFSILKSPGSVVFR         | RENH_HUMAN  |             |            | Renin receptor;                                  | 0.71                            | 0.04                  | 31.20                | -2.11 |
| LERKPAAGLS | AAPVPTAPAAGAPLMDFGNDVFP | RTN4_HUMAN  |             |            | Reticulon-4;                                     | 0.51                            | 0.06                  | 49.40                | -1.87 |
| LLLLAPVAAP | AGSGDPDDPGQPQDAGVPR     | TIG1_HUMAN  |             |            | Retinoic acid receptor responder protein 1;      | 0.24                            | 0.02                  | 30.30                | -4.98 |
| DYMVGSYGPR | AEEYEFLTPVEEAPKGMLAR    | GDIR1_HUMAN |             |            | Rho GDP-dissociation inhibitor 1;                | 2.46                            | 0.13                  | 43.80                | -4.28 |

Table S5

| Non-prime  | Prime               | Id 1        | Id 2        | Id 3 | Protein (Id1)                                    | Fold-change (log <sub>2</sub> ) | Fc standard deviation | X! Tandem hyperscore | ppm   |
|------------|---------------------|-------------|-------------|------|--------------------------------------------------|---------------------------------|-----------------------|----------------------|-------|
| FQEPTEPKTK | AAAPGVEDEPLLR       | RIR2_HUMAN  |             |      | Ribonucleoside-diphosphate reductase subunit M2; | 0.02                            | 0.00                  | 49.20                | -1.38 |
| ASLSSAAATG | TSTSTPAAPTAR        | RL1D1_HUMAN |             |      | Ribosomal L1 domain-containing protein 1;        | 1.30                            | 0.06                  | 32.50                | 2.59  |
| EDSASASLSS | AAATGTSTSTPAAPTAR   | RL1D1_HUMAN |             |      | Ribosomal L1 domain-containing protein 1;        | 1.16                            | 0.07                  | 72.50                | -1.02 |
| LSSAAATGTS | TSTPAAPTAR          | RL1D1_HUMAN |             |      | Ribosomal L1 domain-containing protein 1;        | 0.95                            | 0.03                  | 28.70                | -1.80 |
| MEDSASASLS | SAAATGTSTSTPAAPTAR  | RL1D1_HUMAN |             |      | Ribosomal L1 domain-                             | 0.93                            | 0.07                  | 67.30                | 3.76  |
| MTAEFKKTDK | SILVSPTGPSR         | RRP1B_HUMAN |             |      | Ribosomal RNA                                    | 0.57                            | 0.04                  | 28.20                | -3.74 |
| EETMEEQKTK | VGDGDLSAEEIPENEVSLR | RRP1B_HUMAN |             |      | Ribosomal RNA processing protein 1 homolog B;    | -0.25                           | 0.03                  | 71.30                | 3.25  |
| KLELEEDSEM | DLPAFADSDDDLER      | BMS1_HUMAN  |             |      | Ribosome biogenesis protein BMS1 homolog;        | 0.23                            | 0.01                  | 67.60                | 0.50  |
| EALLEAGQAR | DAQDVQASQAEADQQQTR  | RRBP1_HUMAN |             |      | Ribosome-binding protein 1;                      | 5.55                            | 1.33                  | 104.60               | 0.00  |
| QLKTQLEWTE | AILEDEQTQR          | RRBP1_HUMAN |             |      | Ribosome-binding protein 1;                      | 1.39                            | 0.09                  | 37.40                | -1.29 |
| PYKTLVSTVG | SMVFNEGEAQR         | RRBP1_HUMAN |             |      | Ribosome-binding protein 1;                      | -0.39                           | 0.02                  | 43.00                | -8.91 |
| EAGQARDAQD | VQASQAEADQQQTR      | RRBP1_HUMAN |             |      | Ribosome-binding protein 1;                      | -1.00                           | 0.10                  | 52.10                | 5.46  |
| LQEQQRLLAQ | LDPSLVAFLR          | RPAP1_HUMAN |             |      | RNA polymerase II-associated protein 1;          | 0.64                            | 0.06                  | 32.20                | 0.86  |
| SRRDVYLSPR | DDGYSTKDSYSSR       | RBMX_HUMAN  | RMXL1_HUMAN |      | RNA-binding motif protein, X chromosome;         | 0.96                            | 0.07                  | 23.90                | -0.45 |
| SDHPSGGSYR | DSYESYGNSR          | RBMX_HUMAN  | RMXL1_HUMAN |      | RNA-binding motif protein, X chromosome;         | -0.52                           | 0.02                  | 35.90                | -0.41 |

Table S5

| Non-prime  | Prime                | Id 1        | Id 2       | Id 3 | Protein (Id1)            | Fold-change (log <sub>2</sub> ) | Fc standard deviation | X! Tandem hyperscore | ppm   |
|------------|----------------------|-------------|------------|------|--------------------------|---------------------------------|-----------------------|----------------------|-------|
| EPREGQKLPK | SRTAYSGGAEDLER       | RBMX2_HUMAN |            |      | RNA-binding motif        | -0.42                           | 0.04                  | 64.40                | -1.42 |
| VLASQALSQG | SEPSENANDTIILR       | RBM10_HUMAN |            |      | RNA-binding protein 10;  | 0.08                            | 0.00                  | 59.40                | -0.42 |
| YRTQSSASLA | ASYAAQHPQAAASYR      | RBM14_HUMAN |            |      | RNA-binding protein 14;  | 0.81                            | 0.06                  | 35.70                | 0.63  |
| IKGAIEVLIR | EYSSELNAPSQESDHP     | RBM25_HUMAN |            |      | RNA-binding protein 25;  | 1.47                            | 0.13                  | 28.80                | -1.94 |
| KLPVDSVFNK | FEDESDDDVPR          | RBM25_HUMAN |            |      | RNA-binding protein 25;  | 1.07                            | 0.11                  | 51.50                | 1.10  |
| RKKLPVDSVF | NKFEDESDDDVPR        | RBM25_HUMAN |            |      | RNA-binding protein 25;  | 0.62                            | 0.05                  | 34.30                | -4.87 |
| EGMSKRKRKR | SVQEGENPDDGVR        | RBM34_HUMAN |            |      | RNA-binding protein 34;  | 0.84                            | 0.07                  | 63.50                | -1.95 |
|            | MVKLFIGNLPR          | RBM4B_HUMAN | RBM4_HUMAN |      | RNA-binding protein 4B;  | 0.79                            | 0.01                  | 39.10                | -1.71 |
| FGSEEGSRAR | MREDYDSVEQDGDEPGPQR  | RBM8A_HUMAN |            |      | RNA-binding protein 8A;  | 1.82                            | 0.18                  | 59.10                | -0.27 |
| RAGDWQCPNP | GCGNQNFAR            | EWS_HUMAN   |            |      | RNA-binding protein EWS; | 3.37                            | 0.29                  | 28.80                | -3.71 |
| SQAPSQYSQQ | SSSYGQSSFR           | EWS_HUMAN   |            |      | RNA-binding protein EWS; | 2.39                            | 0.11                  | 36.20                | -2.60 |
| EGRGMPPLR  | GGPGGPGGPGPMGR       | EWS_HUMAN   |            |      | RNA-binding protein EWS; | 0.20                            | 0.01                  | 67.80                | 3.46  |
| SFRQDHPSSM | GVYQESGGFSGPGENR     | EWS_HUMAN   |            |      | RNA-binding protein EWS; | 0.16                            | 0.01                  | 85.70                | -3.23 |
| QAPSQYSQQS | SSYGQSSFR            | EWS_HUMAN   |            |      | RNA-binding protein EWS; | 0.11                            | 0.01                  | 36.90                | -1.36 |
| DHPSSMGVYG | QESGGFSGPGENR        | EWS_HUMAN   |            |      | RNA-binding protein EWS; | 0.09                            | 0.00                  | 58.90                | -1.77 |
| GSYSQAPSQY | SQSSSYGQSSFR         | EWS_HUMAN   |            |      | RNA-binding protein EWS; | 0.04                            | 0.00                  | 71.30                | -2.55 |
| QDHPSSMGVY | GQESGGFSGPGENR       | EWS_HUMAN   |            |      | RNA-binding protein EWS; | -0.20                           | 0.01                  | 53.60                | -1.91 |
| ECNQCKAPKP | DGPGGGPGGSHMGGNYGDDR | FUS_HUMAN   |            |      | RNA-binding protein FUS; | 1.06                            | 0.07                  | 34.10                | -5.29 |
| QCKAPKPDGP | GGGPGGSHMGGNYGDDR    | FUS_HUMAN   |            |      | RNA-binding protein FUS; | 0.08                            | 0.01                  | 61.90                | -3.76 |

Table S5

| Non-prime  | Prime                 | Id 1        | Id 2        | Id 3 | Protein (Id1)                              | Fold-change (log <sub>2</sub> ) | Fc standard deviation | X! Tandem hyperscore | ppm   |
|------------|-----------------------|-------------|-------------|------|--------------------------------------------|---------------------------------|-----------------------|----------------------|-------|
| EVLQTLQDLI | AYFQPPEEEMR           | RYR3_HUMAN  |             |      | Ryanodine receptor 3;                      | 4.65                            | 0.43                  | 26.30                | -6.87 |
| ASGTTTTAVK | IGIIGGTGLDDPEILEGR    | MTAP_HUMAN  |             |      | S-methyl-5'-thioadenosine phosphorylase;   | 2.01                            | 0.16                  | 67.20                | 0.49  |
| EEIRKTFNIK | NDFTEEEEAQVR          | SKP1_HUMAN  |             |      | S-phase kinase-associated                  | 2.52                            | 0.27                  | 35.90                | -0.87 |
| FGQDEDVTSK | AFTGREFDELNPSAQR      | AT2A2_HUMAN |             |      | Sarcoplasmic/endoplasmic reticulum calcium | 0.47                            | 0.02                  | 34.10                | -3.26 |
| SSAASELAEA | SSEELAEAPTEAPSPEAR    | SAFB1_HUMAN | SAFB2_HUMAN |      | Scaffold attachment factor B1;             | 2.85                            | 0.27                  | 59.10                | -0.68 |
| ESTAHAQSSK | ADSL LAVV KR          | SAFB1_HUMAN | SAFB2_HUMAN |      | Scaffold attachment factor B1;             | 1.15                            | 0.12                  | 29.80                | 0.44  |
| SAASELAEAS | SEELAEAPTEAPSPEAR     | SAFB1_HUMAN | SAFB2_HUMAN |      | Scaffold attachment factor B1;             | 0.60                            | 0.04                  | 67.20                | -0.99 |
| VEQSSAASEL | AEASSEELAEAPTEAPSPEAR | SAFB1_HUMAN | SAFB2_HUMAN |      | Scaffold attachment factor                 | 0.53                            | 0.06                  | 85.20                | 0.23  |
| LAEASSEELA | EAPTEAPSPEAR          | SAFB1_HUMAN | SAFB2_HUMAN |      | Scaffold attachment factor B1;             | 0.47                            | 0.03                  | 53.30                | -0.23 |
| ASELAEASSE | ELAEAPTEAPSPEAR       | SAFB1_HUMAN | SAFB2_HUMAN |      | Scaffold attachment factor B1;             | 0.34                            | 0.03                  | 67.10                | -1.12 |
| EQSSAASELA | EASSEELAEAPTEAPSPEAR  | SAFB1_HUMAN | SAFB2_HUMAN |      | Scaffold attachment factor B1;             | 0.32                            | 0.04                  | 76.50                | 1.42  |
| QSSAASELAE | ASSEELAEAPTEAPSPEAR   | SAFB1_HUMAN | SAFB2_HUMAN |      | Scaffold attachment factor B1;             | 0.14                            | 0.02                  | 67.50                | 0.86  |
| ELYKAHEWAR | AHESDQEQGR            | SCRN1_HUMAN |             |      | Secernin-1;                                | 0.94                            | 0.11                  | 40.10                | 0.24  |
| GRSRSNQLPK | AAWIPHVENR            | SCG2_HUMAN  |             |      | Secretogranin-2;                           | -1.86                           | 0.14                  | 32.10                | -2.60 |
| NEQINDEMKR | SGQLGIQEEDLR          | SCG2_HUMAN  |             |      | Secretogranin-2;                           | -3.08                           | 0.52                  | 49.20                | 0.07  |
| VIQHRPSRQY | ATLDVYNPFETR          | SCAM3_HUMAN |             |      | Secretory carrier-                         | 0.42                            | 0.03                  | 52.90                | -1.99 |
| LLGAPRGCA  | EGVAAALTPER           | PLA2R_HUMAN |             |      | Secretory phospholipase A2 receptor;       | -0.42                           | 0.02                  | 48.40                | -2.87 |
| VKGSSQPQAR | VYLTFDEL R            | SEM3C_HUMAN |             |      | Semaphorin-3C;                             | 1.52                            | 0.06                  | 37.30                | -3.63 |



Table S5

| Non-prime  | Prime                | Id 1        | Id 2 | Id 3 | Protein (Id1)                | Fold-change (log <sub>2</sub> ) | Fc standard deviation | X! Tandem hyperscore | ppm   |
|------------|----------------------|-------------|------|------|------------------------------|---------------------------------|-----------------------|----------------------|-------|
| TVFNGPFAHK | EGPNHQLISYQGR        | SEM3C_HUMAN |      |      | Semaphorin-3C;               | -0.37                           | 0.03                  | 35.00                | -4.56 |
| WASLLTGAWP | SFPTQDHLPATPR        | SEM3F_HUMAN |      |      | Semaphorin-3F;               | 0.38                            | 0.01                  | 33.30                | -4.54 |
| GGLLLHGGSS | GPSPGPSVPR           | SEM3G_HUMAN |      |      | Semaphorin-3G;               | 0.82                            | 0.04                  | 32.90                | -3.25 |
| AARLWGLGIG | AEVWWNLVPR           | SEM4C_HUMAN |      |      | Semaphorin-4C;               | 0.71                            | 0.01                  | 48.30                | 4.16  |
| LLLLLGAHGG | LFPEEPPPLSVAPR       | SEM6B_HUMAN |      |      | Semaphorin-6B;               | 2.03                            | 0.06                  | 37.70                | -2.21 |
| DGVRGSPVP  | SGPPMEEDGLR          | SENP3_HUMAN |      |      | Sentrin-specific protease 3; | 0.65                            | 0.06                  | 19.00                | -5.56 |
| INPETPGYVG | FANLPNQVHR           | SEPT2_HUMAN |      |      | Septin-2;                    | 0.69                            | 0.07                  | 35.70                | -2.28 |
| PAPVSQLQSR | LEPKPQPPVAEATPR      | SEPT9_HUMAN |      |      | Septin-9;                    | 1.30                            | 0.04                  | 39.90                | -3.38 |
| GPRGFYGTFD | VHLDLEDR             | SPTC1_HUMAN |      |      | Serine                       | -3.08                           | 0.26                  | 21.70                | 0.00  |
| YETLYANGSR | TETQVGIYILSSSGDGAQHR | PRS23_HUMAN |      |      | Serine protease 23;          | 2.69                            | 0.15                  | 58.70                | -0.98 |
| GSSGKSRRKR | QIYGYDSR             | PRS23_HUMAN |      |      | Serine protease 23;          | -0.32                           | 0.01                  | 30.20                | -1.74 |
| ANDVSDVIKR | ESTLNMVVR            | HTRA1_HUMAN |      |      | Serine protease HTRA1;       | 3.34                            | 0.22                  | 31.40                | -5.29 |
| HRPPVIVLQR | GACGQGQEDPNSLR       | HTRA1_HUMAN |      |      | Serine protease HTRA1;       | 3.11                            | 0.22                  | 50.50                | -1.58 |
| ASAQLSRAGR | SAPLAAGCPDRCEPAR     | HTRA1_HUMAN |      |      | Serine protease HTRA1;       | -0.04                           | 0.00                  | 25.00                | 2.04  |
| ASAQLSRAGR | SAPLAAGCPDR          | HTRA1_HUMAN |      |      | Serine protease HTRA1;       | -0.04                           | 0.00                  | 49.40                | -3.50 |
| M          | VLDLDFR              | SYSC_HUMAN  |      |      | Serine--tRNA ligase,         | 0.59                            | 0.02                  | 32.20                | -3.41 |
| ATRPSPSPER | SSTGPEPPAPTPLLAER    | SRRM2_HUMAN |      |      | Serine/arginine repetitive   | 5.93                            | 0.81                  | 63.60                | 6.80  |
| PTAANYPSSS | RTPQAPASANLVGPR      | SRRM2_HUMAN |      |      | Serine/arginine repetitive   | 0.64                            | 0.03                  | 37.40                | -1.53 |

Table S5

| Non-prime  | Prime                | Id 1        | Id 2       | Id 3 | Protein (Id1)                                                             | Fold-change (log <sub>2</sub> ) | Fc standard deviation | X! Tandem hyperscore | ppm   |
|------------|----------------------|-------------|------------|------|---------------------------------------------------------------------------|---------------------------------|-----------------------|----------------------|-------|
| TSRTTPRRSR | SVSPCSNVESR          | SRRM2_HUMAN |            |      | Serine/arginine repetitive matrix protein 2;                              | 0.21                            | 0.02                  | 40.30                | -4.38 |
| RHGGSPQPLA | TTPLSQEPVNPPSEASPTR  | SRRM2_HUMAN |            |      | Serine/arginine repetitive                                                | -0.12                           | 0.00                  | 59.90                | 0.10  |
| EQSRFQSDSS | SYPTVDSNSLLGQSR      | SRRM2_HUMAN |            |      | Serine/arginine repetitive                                                | -0.58                           | 0.03                  | 27.50                | 0.60  |
| GDVCYADVYR | DGTGVVEFVR           | SRSF1_HUMAN |            |      | Serine/arginine-rich                                                      | 3.01                            | 0.22                  | 35.00                | -2.71 |
| FAFVRFHDKR | DAEDAMDAMDGAVLDGR    | SRSF2_HUMAN |            |      | Serine/arginine-rich splicing factor 2;                                   | 3.77                            | 0.36                  | 73.00                | -4.60 |
| AFRVLSSLLS | SCSDSVALYSFCR        | STK36_HUMAN |            |      | Serine/threonine-protein                                                  | -2.66                           | 0.34                  | 30.20                | 1.76  |
| LLNAPTKRPR | SSTVTEAPIAVVTSR      | NEK9_HUMAN  |            |      | Serine/threonine-protein kinase Nek9;                                     | 1.83                            | 0.17                  | 45.10                | -0.26 |
| EPAKTAQALS | SGSGSQETKIPISLVLR    | OXR1_HUMAN  |            |      | Serine/threonine-protein kinase OSR1;                                     | 0.74                            | 0.04                  | 34.00                | 0.44  |
| IPQDRPTSEE | LLKHIFVLR            | TAOK1_HUMAN |            |      | Serine/threonine-protein kinase TAO1;                                     | 7.35                            | 1.34                  | 15.90                | -7.02 |
| LVGGPEYVHC | LLPPLESLATVEETVVR    | 2AAA_HUMAN  |            |      | Serine/threonine-protein phosphatase 2A 65 kDa regulatory subunit A alpha | -0.42                           | 0.04                  | 54.20                | -1.21 |
| NKCVPSNER  | YYGYTGAFR            | TRFE_HUMAN  | TRFL_HUMAN |      | Serotriferin;                                                             | 2.43                            | 0.09                  | 18.80                | -4.08 |
| QNALLVRYTK | KVPQVSTPTLVEVSR      | ALBU_HUMAN  |            |      | Serum albumin;                                                            | 6.91                            | 1.17                  | 33.20                | 4.30  |
| KTPVSDRVTK | CCTESLVNR            | ALBU_HUMAN  |            |      | Serum albumin;                                                            | 1.96                            | 0.13                  | 36.50                | 2.74  |
| LVTDLTKVHT | ECCHGDLLECADDR       | ALBU_HUMAN  |            |      | Serum albumin;                                                            | 0.24                            | 0.02                  | 49.60                | -1.57 |
| NALLVRYTKK | VPQVSTPTLVEVSR       | ALBU_HUMAN  |            |      | Serum albumin;                                                            | -0.47                           | 0.03                  | 26.50                | -2.65 |
| EGHSEASLAS | ALVEGEIAEEAAEKATSR   | SDPR_HUMAN  |            |      | Serum deprivation-response protein;                                       | 1.73                            | 0.14                  | 39.40                | -2.62 |
| FAEGHSEASL | ASALVEGEIAEEAAEKATSR | SDPR_HUMAN  |            |      | Serum deprivation-                                                        | 1.58                            | 0.11                  | 26.50                | -2.49 |
| AEGHSEASLA | SALVEGEIAEEAAEKATSR  | SDPR_HUMAN  |            |      | Serum deprivation-                                                        | 1.45                            | 0.07                  | 52.40                | -1.54 |
| EASLASALVE | GEIAEEAAEKATSR       | SDPR_HUMAN  |            |      | Serum deprivation-                                                        | 1.44                            | 0.07                  | 37.20                | -0.72 |
| VALEQAQKVR | YEGSYALTSEEAEER      | SDPR_HUMAN  |            |      | Serum deprivation-response protein;                                       | 1.34                            | 0.14                  | 63.80                | -2.02 |
| TNYSFHCNVC | HHSNGNTYFLR          | ASH2L_HUMAN |            |      | Set1/Ash2 histone methyltransferase                                       | 6.28                            | 0.65                  | 12.40                | -4.28 |

Table S5

| Non-prime  | Prime              | Id 1        | Id 2 | Id 3 | Protein (Id1)                                             | Fold-change (log <sub>2</sub> ) | Fc standard deviation | X! Tandem hyperscore | ppm   |
|------------|--------------------|-------------|------|------|-----------------------------------------------------------|---------------------------------|-----------------------|----------------------|-------|
| MSGLR      | VYSTSVTGSR         | SH3L3_HUMAN |      |      | SH3 domain-binding glutamic acid-rich-like                | 2.75                            | 0.12                  | 28.10                | -0.83 |
| AGGGGPAPLS | SAAPSPLSSSLGTAGHR  | SH3K1_HUMAN |      |      | SH3 domain-containing kinase-binding protein 1;           | 0.14                            | 0.01                  | 41.70                | -3.87 |
| PNAQTPSHLG | ATLPVGPVGGDPEVR    | SHC1_HUMAN  |      |      | SHC-transforming protein                                  | 1.07                            | 0.10                  | 72.20                | 0.68  |
| MMNADMDAVD | AENQVELEEKTR       | SCOC_HUMAN  |      |      | Short coiled-coil protein;                                | 0.92                            | 0.07                  | 35.20                | -2.99 |
| VVVMVGSFCV | CYVPYAAFAMYMVNNR   | OPSB_HUMAN  |      |      | Short-wave-sensitive opsin 1;                             | -4.68                           | 0.00                  | 24.10                | -0.65 |
| RHITLDKTKW | GSDHSASLEPGELAEVLR | SIAS_HUMAN  |      |      | Sialic acid synthase;                                     | -0.47                           | 0.02                  | 50.30                | -2.79 |
| M          | VLLESEQFLTELTR     | SRP14_HUMAN |      |      | Signal recognition particle 14 kDa protein;               | 0.35                            | 0.05                  | 76.40                | -1.52 |
| LQVLRQFVRH | ESETTTSVLRLR       | SSBP_HUMAN  |      |      | Single-stranded DNA-binding protein, Small glutamine-rich | -0.29                           | 0.04                  | 44.70                | -1.29 |
| EMPQDLRSPA | RTPPSEEDSAEAER     | SGTA_HUMAN  |      |      | tetratricopeptide repeat-containing protein alpha;        | 0.74                            | 0.03                  | 44.60                | -1.62 |
| SGHLGEVLIR | CNNVLYIR           | RUXF_HUMAN  |      |      | Small nuclear                                             | 3.09                            | 0.13                  | 36.40                | -0.46 |
| MQLANTEEYI | DGALSGHLGEVLIR     | RUXF_HUMAN  |      |      | Small nuclear ribonucleoprotein F;                        | -1.00                           | 0.06                  | 35.90                | -5.09 |
| HLKAVKMTLK | NREPVQLETLSIR      | SMD1_HUMAN  |      |      | Small nuclear ribonucleoprotein Sm D1;                    | 0.18                            | 0.01                  | 38.60                | -4.21 |
| PLSVLTQSVK | NNTQVLINCR         | SMD2_HUMAN  |      |      | Small nuclear                                             | 2.90                            | 0.18                  | 33.10                | -4.84 |
| NITVTYRDGR | VAQLEQVYIR         | SMD3_HUMAN  |      |      | Small nuclear ribonucleoprotein Sm D3;                    | 3.21                            | 0.25                  | 40.80                | -1.20 |
| LAAARVELPG | TAVPSVPEDAAPASR    | S12A2_HUMAN |      |      | Solute carrier family 12 member 2;                        | 2.34                            | 0.22                  | 39.30                | -4.28 |
| GPANHTEAST | NDSGAWLR           | S22AK_HUMAN |      |      | Solute carrier family 22                                  | 4.10                            | 0.15                  | 21.70                | -2.01 |
| LVVHGPGDLR | LENYPIPEPGPNEVLLR  | DHSO_HUMAN  |      |      | Sorbitol dehydrogenase;                                   | 3.54                            | 0.28                  | 55.90                | 5.31  |
| LPPSTLSQDR | LDAPPPPAAPLPR      | SORT_HUMAN  |      |      | Sortilin;                                                 | 1.13                            | 0.11                  | 45.50                | -0.74 |
| PPSTLSQDRL | DAPPPPAAPLPR       | SORT_HUMAN  |      |      | Sortilin;                                                 | 0.13                            | 0.01                  | 43.50                | -1.70 |

Table S5

| Non-prime  | Prime               | Id 1 | Id 2 | Id 3 | Protein (Id1)                                 | Fold-change (log <sub>2</sub> ) | Fc standard deviation | X! Tandem hyperscore | ppm   |
|------------|---------------------|------|------|------|-----------------------------------------------|---------------------------------|-----------------------|----------------------|-------|
| AFPRGGRWRR | SAPGEDEECGRVR       |      |      |      | Sortilin;                                     | -0.47                           | 0.06                  | 33.80                | -2.07 |
| VKKIHENEKR | LEAGDHPVELLAR       |      |      |      | SPARC;                                        | 8.97                            | 0.68                  | 44.70                | -3.59 |
| LSHTELAPLR | APLIPMEHCTTR        |      |      |      | SPARC;                                        | 3.18                            | 0.21                  | 30.60                | -1.58 |
| KLHLDYIGPC | KYIPPCLDSELTEFPLR   |      |      |      | SPARC;                                        | 2.12                            | 0.03                  | 33.60                | -4.19 |
| PCKYIPPCLD | SELTEFPLR           |      |      |      | SPARC;                                        | -0.16                           | 0.01                  | 36.40                | 5.50  |
| IHENEKRLEA | GDHPVELLAR          |      |      |      | SPARC;                                        | -0.82                           | 0.04                  | 23.80                | -1.31 |
| CKYIPPCLDS | ELTEFPLR            |      |      |      | SPARC;                                        | -1.00                           | 0.04                  | 30.90                | 0.10  |
| GPKYIPPCL  | DSELTEFPLR          |      |      |      | SPARC;                                        | -1.34                           | 0.07                  | 30.60                | -4.75 |
| KKIHENEKRL | EAGDHPVELLAR        |      |      |      | SPARC;                                        | -4.24                           | 0.00                  | 33.90                | -3.57 |
| ALLKKHEALM | SDL SAYGSSIQALR     |      |      |      | Spectrin alpha chain, non-erythrocytic 1;     | 0.45                            | 0.04                  | 56.40                | 0.07  |
| PSPTSDRKAK | TALPAQSAATLPAR      |      |      |      | Spectrin beta chain, non-                     | 0.14                            | 0.01                  | 63.30                | -0.21 |
| LELSLQSQL  | DLEDTQIPTSR         |      |      |      | Spermatogenesis-associated protein 5;         | 1.24                            | 0.14                  | 29.60                | -2.38 |
| GEAPANGLRR | AAAPEAYVQK          |      |      |      | Sphingosine-1-phosphate phosphatase 2;        | 4.07                            | 0.26                  | 25.80                | -0.72 |
| LPSHTKIKYR | QTTQDAPEEVR         |      |      |      | Spliceosome-associated protein CWC15 homolog; | -0.34                           | 0.01                  | 33.70                | 1.15  |
| QKTVIPGMPT | VIPGLTR             |      |      |      | Splicing factor 1;                            | 1.20                            | 0.05                  | 22.00                | -1.59 |
| PIRTPARKLT | ATPTPLGGMTGFHMQTEDR |      |      |      | Splicing factor 3B subunit 1;                 | 0.49                            | 0.04                  | 28.40                | 0.48  |
| ATPTPGHIMS | MTPEQLQAWR          |      |      |      | Splicing factor 3B subunit                    | -0.18                           | 0.00                  | 41.30                | -3.63 |

Table S5

| Non-prime  | Prime                 | Id 1        | Id 2 | Id 3 | Protein (Id1)                                 | Fold-change (log <sub>2</sub> ) | Fc standard deviation | X! Tandem hyperscore | ppm   |
|------------|-----------------------|-------------|------|------|-----------------------------------------------|---------------------------------|-----------------------|----------------------|-------|
| EIAKMGTPVP | RPPQDMGQIGVR          | SF3B2_HUMAN |      |      | Splicing factor 3B subunit 2;                 | 0.72                            | 0.03                  | 31.30                | 3.38  |
| IGLQNGVLLR | TVLDPVTGDLSDTR        | SF3B3_HUMAN |      |      | Splicing factor 3B subunit 3;                 | 5.23                            | 0.68                  | 51.30                | 7.77  |
|            | MFLYNLTLQR            | SF3B3_HUMAN |      |      | Splicing factor 3B subunit 3;                 | 0.16                            | 0.01                  | 30.40                | -2.26 |
| TALLPTMTPD | GLAVTPTPVVVSQMTR      | U2AF2_HUMAN |      |      | Splicing factor U2AF 65 kDa subunit;          | -0.76                           | 0.08                  | 66.50                | 1.25  |
| GFGFIKLESR | ALAEIAKAELDDTPMR      | SFPQ_HUMAN  |      |      | Splicing factor, proline-                     | 2.80                            | 0.19                  | 34.10                | -0.72 |
| GGRGGLHDFR | SPPPGMGLNQNR          | SFPQ_HUMAN  |      |      | Splicing factor, proline- and glutamine-rich; | 0.91                            | 0.04                  | 29.10                | -2.15 |
| FEYEYSQRWK | SLDEMEKQQR            | SFPQ_HUMAN  |      |      | Splicing factor, proline-                     | 0.88                            | 0.03                  | 55.40                | -2.50 |
| MMGSDMRTER | FGQGGAGPVGGQGPR       | SFPQ_HUMAN  |      |      | Splicing factor, proline-                     | 0.29                            | 0.02                  | 60.10                | -1.23 |
| LEEQARAQTQ | TPPVSPAPQTEER         | SRC8_HUMAN  |      |      | Src substrate cortactin;                      | 1.17                            | 0.08                  | 46.80                | 0.00  |
| ELSYRGPVSG | TEPEPVYSMEAADYR       | SRC8_HUMAN  |      |      | Src substrate cortactin;                      | 1.13                            | 0.04                  | 41.70                | 1.51  |
| AASFKAELSY | RGPVSGTEPEPVYSMEAADYR | SRC8_HUMAN  |      |      | Src substrate cortactin;                      | 0.67                            | 0.04                  | 65.50                | -0.13 |
| QSSSTVGQSF | SEQHISQLQESIR         | SRPK1_HUMAN |      |      | SRSF protein kinase 1;                        | 0.75                            | 0.05                  | 43.40                | -1.57 |
| LEPVACGSVL | SEGSPLTEQEESSPSHDR    | SRPK2_HUMAN |      |      | SRSF protein kinase 2;                        | 0.66                            | 0.05                  | 27.20                | -0.05 |
| NDSVSPRKS  | VAAQNSAEVVR           | STC1_HUMAN  |      |      | Stanniocalcin-1;                              | 3.78                            | 0.29                  | 56.30                | -1.54 |
| KLNVCIAKR  | NPEAITEVVQLPNHFSNR    | STC1_HUMAN  |      |      | Stanniocalcin-1;                              | 3.54                            | 0.26                  | 42.50                | -3.63 |
| DIQVKELEKR | ASGQAFELILSPR         | STMN1_HUMAN |      |      | Stathmin;                                     | 2.04                            | 0.12                  | 55.70                | -0.63 |
| ELEKRASGQA | FELILSPR              | STMN1_HUMAN |      |      | Stathmin;                                     | 0.18                            | 0.01                  | 32.50                | -2.28 |
| FNDSQRQATK | DAGQISGLNVLR          | GRP75_HUMAN |      |      | Stress-70 protein, mitochondrial;             | -0.29                           | 0.03                  | 36.20                | -2.03 |

Table S5

| Non-prime  | Prime                 | Id 1        | Id 2 | Id 3 | Protein (Id1)                                    | Fold-change (log <sub>2</sub> ) | Fc standard deviation | X! Tandem hyperscore | ppm   |
|------------|-----------------------|-------------|------|------|--------------------------------------------------|---------------------------------|-----------------------|----------------------|-------|
| EFSHLRPEQR | LALLHEGTGPR           | SMC3_HUMAN  |      |      | Structural maintenance of chromosomes protein 3; | 0.89                            | 0.05                  | 26.10                | -4.17 |
| SSAAAHRYSR | EANAPGPVPGER          | SUMF1_HUMAN |      |      | Sulfatase-modifying factor 1;                    | -0.47                           | 0.02                  | 36.40                | -1.71 |
| SQHKGVAARR | VLNTEANVVR            | QSOX1_HUMAN |      |      | Sulfhydryl oxidase 1;                            | 5.16                            | 0.49                  | 33.80                | -3.06 |
| AEETNSAVCR | DFNIPGFPTVR           | QSOX1_HUMAN |      |      | Sulfhydryl oxidase 1;                            | 4.56                            | 0.25                  | 28.80                | -1.86 |
| LSQHKGVAVR | RVLNTEANVVR           | QSOX1_HUMAN |      |      | Sulfhydryl oxidase 1;                            | 4.28                            | 0.68                  | 28.50                | -0.31 |
| AVPGANAAPR | SALYSPSDPLTLQADTVR    | QSOX1_HUMAN |      |      | Sulfhydryl oxidase 1;                            | 3.35                            | 0.43                  | 103.60               | -0.72 |
| DFPAAGSAAR | RDVQNVAAPPELAMGALEESR | QSOX1_HUMAN |      |      | Sulfhydryl oxidase 1;                            | 3.15                            | 0.19                  | 57.10                | 0.76  |
| SRVPVLMESR | SFYTAYLQR             | QSOX1_HUMAN |      |      | Sulfhydryl oxidase 1;                            | 2.78                            | 0.10                  | 40.60                | -5.18 |
| GPLEVRRVGR | SSKQLVDIPEGQLEAR      | QSOX1_HUMAN |      |      | Sulfhydryl oxidase 1;                            | 1.64                            | 0.12                  | 39.80                | -1.75 |
| FPAAGSAARR | DVQNVAAPPELAMGALEESR  | QSOX1_HUMAN |      |      | Sulfhydryl oxidase 1;                            | 1.60                            | 0.21                  | 59.80                | -1.26 |
| RPPKLHPGLR | AAPGQEPPEHMAELQR      | QSOX1_HUMAN |      |      | Sulfhydryl oxidase 1;                            | 1.58                            | 0.09                  | 29.50                | 0.73  |
| PLGQWHLKR  | DTGAALLAESR           | QSOX1_HUMAN |      |      | Sulfhydryl oxidase 1;                            | 1.45                            | 0.12                  | 64.30                | -2.12 |
| VRRVGRSSKQ | LVDIPEGQLEAR          | QSOX1_HUMAN |      |      | Sulfhydryl oxidase 1;                            | 1.09                            | 0.08                  | 39.40                | -1.02 |
| EATLNFLKAH | FSPSNIILDFPAAGSAAR    | QSOX1_HUMAN |      |      | Sulfhydryl oxidase 1;                            | 1.02                            | 0.13                  | 40.80                | 0.21  |
| RRVGRSSKQL | VDIPEGQLEAR           | QSOX1_HUMAN |      |      | Sulfhydryl oxidase 1;                            | 1.00                            | 0.09                  | 52.10                | -1.66 |
| LAVPGANAAP | RSALYSPSDPLTLQADTVR   | QSOX1_HUMAN |      |      | Sulfhydryl oxidase 1;                            | 0.75                            | 0.04                  | 64.70                | 0.45  |
| RVGRSSKQLV | DIPEGQLEAR            | QSOX1_HUMAN |      |      | Sulfhydryl oxidase 1;                            | 0.48                            | 0.03                  | 35.90                | -3.53 |
| WPPACPPLEP | AKLEEIDGFFAR          | QSOX1_HUMAN |      |      | Sulfhydryl oxidase 1;                            | 0.47                            | 0.02                  | 29.20                | -2.93 |
| VRKFGVTDFP | SCYLLFR               | QSOX1_HUMAN |      |      | Sulfhydryl oxidase 1;                            | 0.11                            | 0.01                  | 29.70                | -8.30 |

Table S5

| Non-prime   | Prime                  | Id 1        | Id 2        | Id 3 | Protein (Id1)                                                  | Fold-change (log <sub>2</sub> ) | Fc standard deviation | X! Tandem hyperscore | ppm   |
|-------------|------------------------|-------------|-------------|------|----------------------------------------------------------------|---------------------------------|-----------------------|----------------------|-------|
| AHFSPSNIL   | DFPAAGSAAR             | QSOX1_HUMAN |             |      | Sulfhydryl oxidase 1;                                          | 0.02                            | 0.00                  | 37.70                | -6.56 |
| EGSRPPACPR  | LDPIQPSDVLSLLDNR       | QSOX2_HUMAN |             |      | Sulfhydryl oxidase 2;                                          | 2.69                            | 0.30                  | 45.10                | 1.53  |
| M           | VEKEEAGGGISEEEAAQYDR   | SAE1_HUMAN  |             |      | SUMO-activating enzyme subunit 1;                              | 0.98                            | 0.11                  | 65.60                | 0.85  |
| GFHVHEFGDN  | TAGCTSAGPHFNPLSR       | SODC_HUMAN  |             |      | Superoxide dismutase [Cu-<br>Superoxide dismutase [Cu-<br>Zn]; | 0.44                            | 0.03                  | 30.40                | -4.04 |
| GLHGFHVHEF  | GDNTAGCTSAGPHFNPLSR    | SODC_HUMAN  |             |      | Suppressor of SWI4 1<br>homolog;                               | -0.96                           | 0.04                  | 40.80                | -1.70 |
| RKKSLEGMKK  | ARVGGSDDEEASGIPSR      | SSF1_HUMAN  |             |      | Sushi repeat-containing<br>protein SRPX2;                      | 0.29                            | 0.03                  | 43.50                | -2.84 |
| CTNGVLLDSR  | CDYSCSSGYHLEGDR        | SRPX2_HUMAN |             |      | SWI/SNF complex<br>subunit SMARCC1;                            | 3.15                            | 0.27                  | 41.40                | -4.41 |
| NKVSEHVGSR  | TQDECILHFLR            | SMRC1_HUMAN | SMRC2_HUMAN |      | Syndecan-1;                                                    | 2.55                            | 0.11                  | 36.40                | -2.39 |
| TAVVAVEPDR  | RNQPVDQGATGASQGLLDR    | SDC1_HUMAN  |             |      | Syndecan-4;                                                    | -0.29                           | 0.03                  | 74.50                | 0.43  |
| FVGGVAESIR  | ETEVIDPQDLLEGR         | SDC4_HUMAN  |             |      | Syndecan-4;                                                    | 4.01                            | 0.20                  | 48.80                | 3.77  |
| SEDVSNKVSM  | SSTVQGSNIFER           | SDC4_HUMAN  |             |      | Syndecan-4;                                                    | 2.01                            | 0.07                  | 43.40                | -3.82 |
| LLFFVGGVA   | ESIRETEVIDPQDLLEGR     | SDC4_HUMAN  |             |      | Syndecan-4;                                                    | 0.49                            | 0.01                  | 73.20                | -1.36 |
| LFFVGGVAES  | IRETEVIDPQDLLEGR       | SDC4_HUMAN  |             |      | Syntaxin-7;                                                    | 0.47                            | 0.02                  | 72.60                | -1.31 |
| ERNLVSWESQ  | TQPQVQVQDEEITEDDLR     | STX7_HUMAN  |             |      | T-complex protein 1<br>subunit alpha;                          | 0.23                            | 0.03                  | 80.40                | 6.61  |
| DSTDLVAKLR  | AFHNEAQVNPER           | TCPA_HUMAN  |             |      | T-complex protein 1<br>subunit beta;                           | 0.40                            | 0.02                  | 33.40                | -0.83 |
| AAKVLVDMR   | VQDDEVGDGTTSVTVLAAELLR | TCPB_HUMAN  |             |      | T-complex protein 1<br>subunit beta;                           | 2.78                            | 0.46                  | 113.60               | -0.09 |
| LGEACTIVLR  | GATQQILDEAER           | TCPB_HUMAN  |             |      | T-complex protein 1<br>subunit delta;                          | 1.62                            | 0.09                  | 42.90                | -5.27 |
| MSVNAV MKVI | DPATATSVDLR            | TCPD_HUMAN  |             |      | T-complex protein 1                                            | -0.34                           | 0.02                  | 33.50                | -2.12 |
| ALEIIPRQLC  | DNAGFDATNILNKLKLR      | TCPH_HUMAN  |             |      | T-complex protein 1                                            | -0.69                           | 0.06                  | 33.60                | -2.71 |

Table S5

| Non-prime  | Prime                  | Id 1        | Id 2       | Id 3 | Protein (Id1)                                   | Fold-change (log <sub>2</sub> ) | Fc standard deviation | X! Tandem hyperscore | ppm   |
|------------|------------------------|-------------|------------|------|-------------------------------------------------|---------------------------------|-----------------------|----------------------|-------|
| VAQALEVIPR | TLIQNCGASTIR           | TCPG_HUMAN  |            |      | T-complex protein 1 subunit gamma;              | 3.10                            | 0.29                  | 52.40                | 3.89  |
| PLAVKLQTYK | TAVETAVLLLR            | TCPG_HUMAN  |            |      | T-complex protein 1 subunit gamma;              | 0.11                            | 0.01                  | 36.10                | 0.66  |
| DGAISTIVLR | GSTDNLMDDIER           | TCPQ_HUMAN  |            |      | T-complex protein 1 subunit theta;              | 3.21                            | 0.21                  | 43.90                | 0.22  |
| LVCCSAKNLR | DIDEVSSLLR             | TCPQ_HUMAN  |            |      | T-complex protein 1                             | 3.14                            | 0.27                  | 45.30                | 1.70  |
| MIEIMEMKHK | SETDTSLIR              | TCPZ_HUMAN  |            |      | T-complex protein 1                             | -1.16                           | 0.03                  | 43.40                | -2.74 |
| VANSTANLVK | TIKALDGAFTEENR         | TLN1_HUMAN  |            |      | Talin-1;                                        | 1.73                            | 0.10                  | 37.90                | -1.85 |
| AAAQAAYLVG | VSDPNSQAGQQGLVEPTQFAR  | TLN1_HUMAN  |            |      | Talin-1;                                        | 1.68                            | 0.16                  | 30.10                | -2.35 |
| TIMCVTESIF | SSMGDAGEMVR            | TLN1_HUMAN  | TLN2_HUMAN |      | Talin-1;                                        | 1.55                            | 0.11                  | 29.10                | -2.82 |
| KFFYSDQNVD | SRDPVQLNLLYVQAR        | TLN1_HUMAN  | TLN2_HUMAN |      | Talin-1;                                        | -1.12                           | 0.05                  | 50.40                | -2.05 |
| LQRSQSLPHS | ATVTLGGTSDPSTLSSSALSER | TB22A_HUMAN |            |      | TBC1 domain family member 22A;                  | -0.04                           | 0.00                  | 89.90                | 5.52  |
| LDILKNKAKR | SLTSSLENIFSR           | TBCD4_HUMAN |            |      | TBC1 domain family                              | -0.27                           | 0.02                  | 58.60                | -1.58 |
| MEASSDGGFR | SQENSPSPPR             | TSH3_HUMAN  |            |      | Teashirt homolog 3;                             | 3.10                            | 0.10                  | 20.80                | -3.81 |
| YRLGPASAAD | TGSEAKPGALAEGAAEPEPQR  | TE2IP_HUMAN |            |      | Telomeric repeat-binding factor 2-interacting   | -0.34                           | 0.04                  | 53.50                | 0.51  |
| PAACAGDMAD | AASPCSVVNDLR           | THOP1_HUMAN |            |      | Thimet oligopeptidase;                          | -0.04                           | 0.00                  | 40.80                | -4.16 |
| M          | VGVKPVGSDPDFQPELSGAGSR | TXNL1_HUMAN |            |      | Thioredoxin-like protein 1;                     | 0.51                            | 0.05                  | 54.90                | -0.93 |
| GEDLEVNIAK | VDVTEQPGLSGR           | TMX1_HUMAN  |            |      | Thioredoxin-related                             | 0.31                            | 0.02                  | 36.60                | 0.62  |
| RTIYTTRISL | TTFNIQDGPDFQDR         | THIOM_HUMAN |            |      | Thioredoxin,                                    | -0.23                           | 0.02                  | 63.10                | -1.78 |
| AAVHYDRSGR | SLGTADVHFER            | THOC4_HUMAN |            |      | THO complex subunit 4;                          | 0.06                            | 0.00                  | 28.00                | -1.66 |
| AVRTSVPLHR | SRDETPALAGTDASR        | THSD4_HUMAN |            |      | Thrombospondin type-1 domain-containing protein | -0.66                           | 0.03                  | 30.40                | -2.46 |



Table S5

| Non-prime    | Prime                    | Id 1        | Id 2       | Id 3 | Protein (Id1)                                  | Fold-change (log <sub>2</sub> ) | Fc standard deviation | X! Tandem hyperscore | ppm   |
|--------------|--------------------------|-------------|------------|------|------------------------------------------------|---------------------------------|-----------------------|----------------------|-------|
| SMVLELRGLR   | TIVTTLQDSIR              | TSP1_HUMAN  |            |      | Thrombospondin-1;                              | 3.71                            | 0.36                  | 42.60                | -1.41 |
| STTGTGEHLR   | NALWHTGNTPGQVR           | TSP1_HUMAN  | TSP2_HUMAN |      | Thrombospondin-1;                              | 3.04                            | 0.23                  | 25.80                | 1.52  |
| IDGDGILNER   | DNCQYVYNVDQR             | TSP1_HUMAN  |            |      | Thrombospondin-1;                              | 1.96                            | 0.18                  | 50.40                | -0.44 |
| NFQGVLQNVNR  | FVFGTTPEDILR             | TSP1_HUMAN  |            |      | Thrombospondin-1;                              | 1.92                            | 0.10                  | 60.40                | -1.62 |
| SSMVLELRGL   | RTIVTTLQDSIR             | TSP1_HUMAN  |            |      | Thrombospondin-1;                              | -0.73                           | 0.05                  | 31.80                | -2.57 |
| FLMHVCGTNR   | IPESGGDNSVFDIFELTGAAR    | TSP1_HUMAN  |            |      | Thrombospondin-1;                              | -1.49                           | 0.13                  | 47.50                | 1.70  |
| DLQAICGISC   | DELSSMVLELR              | TSP1_HUMAN  |            |      | Thrombospondin-1;                              | -2.00                           | 0.16                  | 45.20                | 4.82  |
| VLFMLHVCGT   | NRIPESGGDNSVFDIFELTGAAR  | TSP1_HUMAN  |            |      | Thrombospondin-1;                              | -2.00                           | 0.16                  | 80.00                | -1.36 |
| GVLFLMHVCG   | TNRIPESGGDNSVFDIFELTGAAR | TSP1_HUMAN  |            |      | Thrombospondin-1;                              | -2.00                           | 0.24                  | 74.30                | -3.46 |
| TDNNGEGDAC   | AADIDGDGILNER            | TSP1_HUMAN  |            |      | Thrombospondin-1;                              | -2.08                           | 0.26                  | 44.10                | -3.01 |
| QGVLQNVRFV   | FGTTPEDILR               | TSP1_HUMAN  |            |      | Thrombospondin-1;                              | -2.92                           | 0.00                  | 23.70                | -2.79 |
| LLLLCFF TSA  | SQDLQVIDLLTVGESR         | TSP3_HUMAN  |            |      | Thrombospondin-3;                              | 2.33                            | 0.33                  | 78.20                | -0.89 |
| LLCFF TSA SQ | DLQVIDLLTVGESR           | TSP3_HUMAN  |            |      | Thrombospondin-3;                              | 1.37                            | 0.19                  | 67.60                | -0.06 |
| PGYKAEGKYK   | DDPVDLR                  | TR150_HUMAN |            |      | Thyroid hormone receptor-associated protein 3; | 0.59                            | 0.03                  | 27.20                | -1.74 |
| HSNKKEQEFR   | SIFQHIQSAQSQR            | TR150_HUMAN |            |      | Thyroid hormone receptor-                      | -0.27                           | 0.03                  | 34.20                | 7.41  |
| SPRERSPALK   | SPLQSVVVR                | TR150_HUMAN |            |      | Thyroid hormone receptor-associated protein 3; | -0.39                           | 0.01                  | 28.80                | -3.95 |
| PLDSPGRRKR   | DTNAPESFKDTAESR          | TRIPB_HUMAN |            |      | Thyroid receptor-                              | 0.92                            | 0.08                  | 26.90                | -2.67 |
| SRDLEQPTYR   | YESSSYTDQFSR             | ZO1_HUMAN   |            |      | Tight junction protein ZO-                     | 0.09                            | 0.01                  | 43.40                | -1.13 |
| EKMDHKARLQ   | RMQELQEAQNAR             | ZO2_HUMAN   |            |      | Tight junction protein ZO-                     | 0.62                            | 0.07                  | 40.00                | 3.11  |

Table S5

| Non-prime  | Prime                 | Id 1        | Id 2 | Id 3 | Protein (Id1)                                | Fold-change (log <sub>2</sub> ) | Fc standard deviation | X! Tandem hyperscore | ppm   |
|------------|-----------------------|-------------|------|------|----------------------------------------------|---------------------------------|-----------------------|----------------------|-------|
| EEPLVSSITR | SSEPVQHEESIR          | ZO2_HUMAN   |      |      | Tight junction protein ZO-2;                 | 0.16                            | 0.02                  | 35.70                | -2.10 |
| DGEGGAYTDN | ELDEPAEEPLVSSITR      | ZO2_HUMAN   |      |      | Tight junction protein ZO-2;                 | -0.32                           | 0.02                  | 71.10                | 0.27  |
| EDTDGEGGAY | TDNELDEPAEEPLVSSITR   | ZO2_HUMAN   |      |      | Tight junction protein ZO-2;                 | -0.52                           | 0.03                  | 80.00                | 1.35  |
| EGGAYTDNEL | DEPAEEPLVSSITR        | ZO2_HUMAN   |      |      | Tight junction protein ZO-2;                 | -0.55                           | 0.02                  | 45.10                | -1.20 |
| GEGGAYTDNE | LDEPAEEPLVSSITR       | ZO2_HUMAN   |      |      | Tight junction protein ZO-2;                 | -0.76                           | 0.05                  | 35.90                | 3.86  |
| RMGATPTPFK | STGDIAGTVVPETNKEPR    | ZO2_HUMAN   |      |      | Tight junction protein ZO-2;                 | -1.00                           | 0.06                  | 39.80                | -2.01 |
| TDGEGGAYTD | NELDEPAEEPLVSSITR     | ZO2_HUMAN   |      |      | Tight junction protein ZO-2;                 | -1.04                           | 0.06                  | 62.80                | 0.83  |
| ELRLEIPGSR | LEQEEPLTDAER          | TJAP1_HUMAN |      |      | Tight junction-associated                    | 0.72                            | 0.07                  | 33.10                | -1.98 |
| WNSKDVGPHR | DLVGELGTALR           | FUCO_HUMAN  |      |      | Tissue alpha-L-                              | 2.69                            | 0.17                  | 48.40                | -6.48 |
| TRDNANRIIK | TTLQKEKPDFCFLEEDPGICR | TFPI1_HUMAN |      |      | Tissue factor pathway                        | 0.85                            | 0.05                  | 43.90                | -1.89 |
| VPSCSTCGLR | QYSQPQFR              | TPA_HUMAN   |      |      | Tissue-type plasminogen activator;           | 3.91                            | 0.28                  | 25.00                | -0.74 |
| AGKCCEIDTR | ATCYEDQGISYR          | TPA_HUMAN   |      |      | Tissue-type plasminogen activator;           | 3.11                            | 0.25                  | 56.30                | -1.14 |
| IHARFRRGAR | SYQVICR               | TPA_HUMAN   |      |      | Tissue-type plasminogen activator;           | 0.11                            | 0.00                  | 30.60                | -6.25 |
| HRGENVKSA  | NLIVEEEDLR            | TITIN_HUMAN |      |      | Titin;                                       | 3.84                            | 0.42                  | 33.60                | -2.38 |
| TRGSCRLSWK | MPDDGGDR              | TITIN_HUMAN |      |      | Titin;                                       | 3.43                            | 0.06                  | 14.80                | -6.66 |
| LAKGNKSILD | ADPEAQALLEISGHSR      | K1609_HUMAN |      |      | TLD domain-containing                        | -0.42                           | 0.02                  | 32.20                | -0.52 |
| TRMQNDSILK | SELGNQSPSTSSR         | TOIP1_HUMAN |      |      | Torsin-1A-interacting                        | 1.45                            | 0.14                  | 58.90                | 1.02  |
| ISKKTVRSIQ | EAPVSEDLVIR           | TOIP1_HUMAN |      |      | Torsin-1A-interacting protein 1;             | 0.51                            | 0.04                  | 41.30                | -9.11 |
| AIVGFQVLNA | IENLDDNAQR            | CI167_HUMAN |      |      | Torsin-4A;                                   | 0.62                            | 0.05                  | 30.50                | -3.68 |
| PSQMDVELVS | GSPVALSPQPR           | TOX4_HUMAN  |      |      | TOX high mobility group box family member 4; | 1.27                            | 0.12                  | 37.60                | -0.35 |
|            | MQLTHQLDLFPECR        | TPRKB_HUMAN |      |      | TP53RK-binding protein;                      | 0.14                            | 0.00                  | 42.90                | -5.01 |
| ITTPQYHQLQ | ASTTPQSAQAQPSSSSR     | SPT6H_HUMAN |      |      | Transcription elongation                     | 0.37                            | 0.03                  | 84.90                | 0.92  |
| VTLDDILSLK | SGPPEGGSVAVQDADIEKR   | TCF20_HUMAN |      |      | Transcription factor 20;                     | 0.65                            | 0.03                  | 24.40                | -1.97 |

Table S5

| Non-prime   | Prime                     | Id 1        | Id 2 | Id 3 | Protein (Id1)                                     | Fold-change (log <sub>2</sub> ) | Fc standard deviation | X! Tandem hyperscore | ppm   |
|-------------|---------------------------|-------------|------|------|---------------------------------------------------|---------------------------------|-----------------------|----------------------|-------|
| LPSSTAAENK  | ASPAGTAGGPGAGAAAGGTGPLA   | TAF10_HUMAN |      |      | Transcription initiation factor TFIID subunit 10; | 0.04                            | 0.00                  | 60.80                | -1.00 |
| LTADSQPPVF  | KVFPGSTTEDYNLIVIER        | TIF1B_HUMAN |      |      | Transcription                                     | -0.12                           | 0.00                  | 44.20                | 0.98  |
| EAAIGAPPTA  | TEGPETKPVLMALAEGPGAEGPR   | TIF1B_HUMAN |      |      | Transcription intermediary factor 1-              | -0.12                           | 0.00                  | 63.10                | -0.38 |
| IVAERPGTNS  | TGPAPMAPP                 | TIF1B_HUMAN |      |      | Transcription                                     | -0.16                           | 0.01                  | 29.60                | -1.27 |
| MAASAAAASA  | AAASAASGSPGPGEGSAGGEKR    | TIF1B_HUMAN |      |      | Transcription intermediary factor 1-              | -0.20                           | 0.02                  | 43.00                | -4.94 |
| EGPETKPVLM  | ALAEGPGAEGPR              | TIF1B_HUMAN |      |      | Transcription intermediary factor 1-              | -0.20                           | 0.01                  | 56.10                | -2.50 |
| EGPRLASPSG  | STSSGLEVVAPEGTSAPGGGPGTLI | TIF1B_HUMAN |      |      | Transcription intermediary factor 1-              | -0.27                           | 0.03                  | 33.00                | 0.03  |
| STAPSAAASA  | SASAAASSPAGGGAEALELLEHCG  | TIF1B_HUMAN |      |      | Transcription beta;                               | -0.34                           | 0.02                  | 33.60                | -4.47 |
| PSGSTSSGLE  | VVAPEGTSAPGGGPGTLDDSATICF | TIF1B_HUMAN |      |      | Transcription intermediary factor 1-              | -0.44                           | 0.04                  | 48.10                | 1.98  |
| AASASASAAA  | SSPAGGGAEALELLEHCGVCR     | TIF1B_HUMAN |      |      | Transcription beta;                               | -0.55                           | 0.03                  | 35.10                | -1.00 |
| AAASASASAA  | ASSPAGGGAEALELLEHCGVCR    | TIF1B_HUMAN |      |      | Transcription                                     | -0.58                           | 0.03                  | 38.50                | -2.02 |
| TAPSAAASAS  | ASAAAASSPAGGGAEALELLEHCGV | TIF1B_HUMAN |      |      | Transcription intermediary factor 1-              | -0.63                           | 0.05                  | 48.30                | -0.97 |
| KRSTAPSAAA  | SASASAAAASSPAGGGAEALELLEH | TIF1B_HUMAN |      |      | Transcription intermediary factor 1-              | -0.69                           | 0.05                  | 47.40                | -0.46 |
| ERTVYCNVHK  | HEPLVLFCECDTLTCR          | TIF1B_HUMAN |      |      | Transcription                                     | -0.76                           | 0.03                  | 44.80                | -1.47 |
| ASAAAASSPAG | GGAEALELLEHCGVCR          | TIF1B_HUMAN |      |      | Transcription intermediary factor 1-              | -0.89                           | 0.03                  | 28.00                | -2.93 |
| AEPHVSQVVKR | SRSGEGEVSGLMR             | TIF1B_HUMAN |      |      | Transcription intermediary factor 1-              | -1.08                           | 0.09                  | 33.80                | -2.29 |
| TADSQPPVFK  | VFPGSTTEDYNLIVIER         | TIF1B_HUMAN |      |      | Transcription                                     | -1.25                           | 0.03                  | 65.60                | -0.96 |
| SGISPCFSSR  | RSSEASQAEGR               | GLI3_HUMAN  |      |      | Transcriptional activator GLI3;                   | 6.21                            | 0.30                  | 29.60                | 2.07  |
| QSSGDEALSK  | SVPVTVDDDDDDNDPENR        | ATRX_HUMAN  |      |      | Transcriptional regulator                         | 0.11                            | 0.01                  | 93.60                | 0.49  |
| FNHTQPPSR   | SSGLPNIPVQTISR            | TFR1_HUMAN  |      |      | Transferrin receptor                              | 2.80                            | 0.19                  | 32.30                | 1.87  |
| RLAGTESPVR  | EPEGEDFPAAR               | TFR1_HUMAN  |      |      | Transferrin receptor                              | 0.56                            | 0.03                  | 34.60                | -0.80 |

Table S5

| Non-prime  | Prime                | Id 1        | Id 2 | Id 3 | Protein (Id1)                                 | Fold-change (log <sub>2</sub> ) | Fc standard deviation | X! Tandem hyperscore | ppm   |
|------------|----------------------|-------------|------|------|-----------------------------------------------|---------------------------------|-----------------------|----------------------|-------|
| QHLQSSRHRR | ALDTNYCFSSTEKNCCVR   | TGFB1_HUMAN |      |      | Transforming growth factor beta-1;            | 1.15                            | 0.13                  | 26.00                | -2.28 |
| EGKNMACVQR | TLMNLGGLAVAR         | TAGL2_HUMAN |      |      | Transgelin-2;                                 | 4.39                            | 0.48                  | 63.50                | -4.74 |
| GKNMACVQRT | LMNLGGLAVAR          | TAGL2_HUMAN |      |      | Transgelin-2;                                 | -1.55                           | 0.14                  | 26.40                | 3.83  |
| ESEIRRERER | QTNPSAMEVEEDDPVPEIR  | TERA_HUMAN  |      |      | Transitional endoplasmic reticulum ATPase;    | 3.09                            | 0.21                  | 53.20                | 5.49  |
| ALRRFGRFDR | EVDIGIPDATGR         | TERA_HUMAN  |      |      | Transitional endoplasmic reticulum ATPase;    | 2.16                            | 0.11                  | 23.40                | -1.10 |
| ELLKMFGIDR | DAIAQAVR             | TKT_HUMAN   |      |      | Transketolase;                                | 3.56                            | 0.09                  | 40.30                | -3.44 |
| RSGKPAELLK | MFGIDRDAIAQAVR       | TKT_HUMAN   |      |      | Transketolase;                                | 3.23                            | 0.20                  | 32.90                | -1.82 |
| IYSQIQSKKK | ILATPPQEDAPSVDIANIR  | TKT_HUMAN   |      |      | Transketolase;                                | 0.20                            | 0.02                  | 80.60                | 1.41  |
| ATRNRTVPFC | STFAAFFTR            | TKT_HUMAN   |      |      | Transketolase;                                | -0.76                           | 0.03                  | 29.30                | -2.22 |
| KKILATPPQE | DAPSVDIANIR          | TKT_HUMAN   |      |      | Transketolase;                                | -0.86                           | 0.08                  | 48.10                | -1.24 |
| YSQIQSKKKI | LATPPQEDAPSVDIANIR   | TKT_HUMAN   |      |      | Transketolase;                                | -1.55                           | 0.09                  | 62.60                | 5.25  |
| AMAFASIYKL | DNLVAILDINR          | TKT_HUMAN   |      |      | Transketolase;                                | -2.92                           | 0.22                  | 43.70                | 0.00  |
| ASEFDPQYNK | DATSRPTDNILIPQLIR    | SEC63_HUMAN |      |      | Translocation protein                         | 0.35                            | 0.02                  | 39.80                | -1.08 |
| MAGVGDAAM  | APGEGGGGGVDGPQR      | TAPT1_HUMAN |      |      | Transmembrane anterior                        | -6.27                           | 0.00                  | 30.60                | 0.67  |
| FLLGPRLVLA | ISFHLPINSR           | TMEDA_HUMAN |      |      | Transmembrane emp24 domain-containing protein | 0.34                            | 0.02                  | 32.80                | -2.06 |
| DQPEGTPVEL | YYTVHPGGER           | T132D_HUMAN |      |      | Transmembrane protein 132D;                   | 0.53                            | 0.04                  | 28.50                | 1.65  |
| LQVAAYVWFC | YAVLVSLR             | TM145_HUMAN |      |      | Transmembrane protein 145;                    | -0.37                           | 0.02                  | 19.90                | -1.15 |
| LQAKASGKTS | QVGAASAPAKESPR       | TCOF_HUMAN  |      |      | Treacle protein;                              | 2.43                            | 0.23                  | 31.60                | -2.38 |
| IETFHKYASE | DSNGATLTGR           | TCHL1_HUMAN |      |      | Trichohyalin-like protein                     | 5.58                            | 0.22                  | 28.70                | -5.19 |
| ELIGTLNAAK | VPADTEVVCPAPTAYIDFAR | TPIS_HUMAN  |      |      | Triosephosphate                               | 3.90                            | 0.33                  | 72.30                | -0.36 |
| VHEKLRGWLK | SNVSDAVAQSTR         | TPIS_HUMAN  |      |      | Triosephosphate                               | 2.37                            | 0.15                  | 73.00                | -3.17 |

Table S5

| Non-prime  | Prime              | Id 1        | Id 2        | Id 3        | Protein (Id1)                                    | Fold-change (log <sub>2</sub> ) | Fc standard deviation | X! Tandem hyperscore | ppm   |
|------------|--------------------|-------------|-------------|-------------|--------------------------------------------------|---------------------------------|-----------------------|----------------------|-------|
| TGEISPGMIK | DCGATWVVLGHSER     | TPIS_HUMAN  |             |             | Triosephosphate isomerase;                       | 1.85                            | 0.09                  | 39.90                | -3.65 |
| HEKLRGWLKS | NVSDAVAQSTR        | TPIS_HUMAN  |             |             | Triosephosphate                                  | -1.34                           | 0.10                  | 42.80                | -3.47 |
| QEVHEKLRGW | LKSNVSDAVAQSTR     | TPIS_HUMAN  |             |             | Triosephosphate isomerase;                       | -1.55                           | 0.14                  | 41.90                | -2.52 |
| LFALILSGKC | SYSPEPDQR          | TPP1_HUMAN  |             |             | Tripeptidyl-peptidase 1;                         | 1.47                            | 0.09                  | 33.30                | -0.36 |
| LFALILSGKC | SYSPEPDQRR         | TPP1_HUMAN  |             |             | Tripeptidyl-peptidase 1;                         | 0.80                            | 0.02                  | 27.80                | -7.12 |
| QRNVGSSQFK | TIEDDLVSALVR       | TRUA_HUMAN  |             |             | tRNA pseudouridine                               | 3.97                            | 0.25                  | 28.10                | -2.86 |
| ESPSLHKRKR | EAPDQDPGGPR        | DUS2L_HUMAN |             |             | tRNA-dihydrouridine(20) synthase [NAD(P)+]-like; | -0.16                           | 0.01                  | 34.30                | -1.11 |
| HHSLALTSFK | RQQEEFQEQSALAAEAR  | SEN34_HUMAN |             |             | tRNA-splicing endonuclease subunit               | -0.73                           | 0.07                  | 52.10                | 0.00  |
| LSETELKQLE | TVLDDLDPENALLPAGFR | TMOD3_HUMAN |             |             | Tropomodulin-3;                                  | 0.96                            | 0.14                  | 84.60                | -2.07 |
| TELKQLETVL | DDLDPENALLPAGFR    | TMOD3_HUMAN |             |             | Tropomodulin-3;                                  | 0.32                            | 0.01                  | 51.00                | 4.54  |
| AEGDVAALNR | RIQLVEEELDR        | TPM1_HUMAN  | TPM2_HUMAN  | TPM3_HUMAN  | Tropomyosin alpha-1 chain;                       | 3.45                            | 0.18                  | 40.50                | -1.82 |
| EGDVAALNRR | IQLVEEELDRAQER     | TPM1_HUMAN  | TPM2_HUMAN  | TPM3_HUMAN  | Tropomyosin alpha-1 chain;                       | 1.51                            | 0.12                  | 33.50                | 1.02  |
| QEKLELAEKK | AADAEAEVASLNR      | TPM3_HUMAN  |             |             | Tropomyosin alpha-3 chain;                       | 3.37                            | 0.62                  | 32.30                | -2.60 |
| EGDVAALNRR | IQLVEEELDR         | TPM3_HUMAN  | TPM1_HUMAN  | TPM2_HUMAN  | Tropomyosin alpha-3 chain;                       | 2.51                            | 0.17                  | 47.70                | 4.87  |
| RKYEEVARKL | VIEGDLER           | TPM3_HUMAN  |             |             | Tropomyosin alpha-3                              | 0.98                            | 0.09                  | 33.30                | 0.28  |
| PWTVQTSSAK | GIDYDKLIVR         | SYWC_HUMAN  |             |             | Tryptophan--tRNA ligase,                         | 3.68                            | 0.30                  | 25.30                | -1.11 |
| RTDIQCLIPC | AIDQDPYFR          | SYWC_HUMAN  |             |             | Tryptophan--tRNA ligase,                         | -0.14                           | 0.01                  | 24.00                | -1.64 |
| KHVPRAVFVD | LEPTVIDEVR         | TBA1A_HUMAN | TBA1B_HUMAN | TBA1C_HUMAN | Tubulin alpha-1A chain;                          | 2.72                            | 0.19                  | 35.90                | -3.40 |
| AGKHVPRAVF | VDLEPTVIDEVR       | TBA1A_HUMAN | TBA1B_HUMAN | TBA1C_HUMAN | Tubulin alpha-1A chain;                          | 1.72                            | 0.14                  | 51.30                | -2.97 |
| PTGFKVGINY | QPPTVVPGGDLAKVQR   | TBA1A_HUMAN | TBA1B_HUMAN | TBA1C_HUMAN | Tubulin alpha-1A chain;                          | 1.37                            | 0.14                  | 26.70                | -3.18 |

Table S5

| Non-prime   | Prime               | Id 1        | Id 2        | Id 3        | Protein (Id1)                             | Fold-change (log <sub>2</sub> ) | Fc standard deviation | X! Tandem hyperscore | ppm   |
|-------------|---------------------|-------------|-------------|-------------|-------------------------------------------|---------------------------------|-----------------------|----------------------|-------|
| GKHVPRAVFV  | DLEPTVIDEVR         | TBA1A_HUMAN | TBA1B_HUMAN | TBA1C_HUMAN | Tubulin alpha-1A chain;                   | 0.94                            | 0.07                  | 45.50                | -1.14 |
| YRQLFHPEQL  | ITGKEDAANNYAR       | TBA1A_HUMAN | TBA1B_HUMAN | TBA1C_HUMAN | Tubulin alpha-1A chain;                   | 0.84                            | 0.09                  | 33.00                | 0.95  |
| ETGAGKHVPR  | AVFVDLEPTVIDEVR     | TBA1A_HUMAN | TBA1B_HUMAN | TBA1C_HUMAN | Tubulin alpha-1A chain;                   | 0.76                            | 0.06                  | 59.70                | -0.52 |
| MYAKRAVFVHW | YVGEGMEEGEFSEAR     | TBA1A_HUMAN | TBA1B_HUMAN | TBA1C_HUMAN | Tubulin alpha-1A chain;                   | 0.55                            | 0.05                  | 34.00                | 5.24  |
| GAGKHVPRAV  | FVDLEPTVIDEVR       | TBA1A_HUMAN | TBA1B_HUMAN | TBA1C_HUMAN | Tubulin alpha-1A chain;                   | 0.53                            | 0.05                  | 37.90                | 0.64  |
| FEGPLNVDLI  | EFQTNLVPYPR         | TBA1A_HUMAN | TBA1B_HUMAN | TBA1C_HUMAN | Tubulin alpha-1A chain;                   | 0.45                            | 0.03                  | 43.80                | -2.29 |
| SETGAGKHVP  | RAVFDLEPTVIDEVR     | TBA1A_HUMAN | TBA1B_HUMAN | TBA1C_HUMAN | Tubulin alpha-1A chain;                   | 0.09                            | 0.00                  | 43.30                | -4.01 |
| NNWAKGHYTE  | GAELVDSVLDVVR       | TBB2A_HUMAN | TBB2B_HUMAN | TBB3_HUMAN  | Tubulin beta-2A chain;                    | 0.42                            | 0.02                  | 47.80                | -4.27 |
| AKGHYTEGAE  | LVDSVLDVVR          | TBB2A_HUMAN | TBB2B_HUMAN | TBB3_HUMAN  | Tubulin beta-2A chain;                    | 0.31                            | 0.02                  | 24.20                | -2.96 |
| GRYVPRAVLV  | DLEPGTMDSVR         | TBB2A_HUMAN | TBB2B_HUMAN | TBB3_HUMAN  | Tubulin beta-2A chain;                    | 0.18                            | 0.02                  | 36.80                | -2.23 |
| SGGRYVPRAV  | LVDLEPGTMDSVR       | TBB2A_HUMAN | TBB2B_HUMAN | TBB3_HUMAN  | Tubulin beta-2A chain;                    | 0.14                            | 0.01                  | 33.20                | -0.34 |
| QSGAGNNWAK  | GHYTEGAELVDSVLDVVR  | TBB2A_HUMAN | TBB2B_HUMAN | TBB3_HUMAN  | Tubulin beta-2A chain;                    | 0.13                            | 0.01                  | 47.00                | 1.95  |
| GHYTEGAELV  | DSVLDVVR            | TBB2A_HUMAN | TBB2B_HUMAN | TBB3_HUMAN  | Tubulin beta-2A chain;                    | -0.10                           | 0.01                  | 26.70                | -5.97 |
| EATGGKYVPR  | AILVDLEPGTMDSVR     | TBB2A_HUMAN | TBB2B_HUMAN | TBB3_HUMAN  | Tubulin beta-2A chain;                    | -0.29                           | 0.03                  | 60.50                | -2.37 |
| IGAKFWEVIS  | DEHGIDPTGTYHGSDQLER | TBB4A_HUMAN | TBB4B_HUMAN |             | Tubulin beta-4A chain;                    | 0.64                            | 0.05                  | 29.40                | -1.42 |
| EASGGRYVPR  | AVLVDLEPGTMDSVR     | TBB4B_HUMAN | TBB4A_HUMAN | TBB8_HUMAN  | Tubulin beta-4B chain;                    | 2.01                            | 0.13                  | 63.90                | -1.10 |
| LQLDRISVYY  | NEATGGKYVPR         | TBB4B_HUMAN | TBB5_HUMAN  |             | Tubulin beta-4B chain;                    | 1.47                            | 0.14                  | 50.20                | 0.72  |
| GNNWAKGHYT  | EGAELVDSVLDVVR      | TBB4B_HUMAN | TBB2A_HUMAN | TBB2B_HUMAN | Tubulin beta-4B chain;                    | -0.23                           | 0.03                  | 56.20                | -0.59 |
| ESSSQKYVPR  | AALVDLEPGTMDSVR     | TBB6_HUMAN  |             |             | Tubulin beta-6 chain;                     | 4.42                            | 0.52                  | 43.10                | -0.62 |
| APFFYMPQQV  | AYTLLWPLR           | TTL12_HUMAN |             |             | Tubulin--tyrosine ligase-like protein 12; | 0.34                            | 0.02                  | 39.40                | -5.82 |
| SRMMIPDCQR  | RLEAAAYLDLQR        | TBCA_HUMAN  |             |             | Tubulin-specific chaperone A;             | 4.94                            | 0.76                  | 32.70                | -0.07 |

Table S5

| Non-prime   | Prime             | Id 1        | Id 2 | Id 3 | Protein (Id1)                                         | Fold-change (log <sub>2</sub> ) | Fc standard deviation | X! Tandem hyperscore | ppm   |
|-------------|-------------------|-------------|------|------|-------------------------------------------------------|---------------------------------|-----------------------|----------------------|-------|
| PGSAASPRLR  | EGPELSPDDPAGLLDLR | TNFL9_HUMAN |      |      | Tumor necrosis factor ligand superfamily              | 1.05                            | 0.06                  | 51.10                | 7.68  |
| LLLAAACAVF  | LACPWAVSGAR       | TNFL9_HUMAN |      |      | Tumor necrosis factor                                 | 0.34                            | 0.01                  | 33.20                | -1.81 |
| LLLVSASAL   | ITQQDLAPQQR       | TR10B_HUMAN |      |      | Tumor necrosis factor                                 | 1.24                            | 0.11                  | 37.00                | 0.60  |
| AVLLLVSAS   | ALITQQDLAPQQR     | TR10B_HUMAN |      |      | Tumor necrosis factor receptor superfamily            | 0.11                            | 0.01                  | 40.60                | -2.85 |
| GTAPCSRGS   | WSADLDKCMDCASCR   | TNR12_HUMAN |      |      | Tumor necrosis factor                                 | 0.78                            | 0.09                  | 23.60                | -1.45 |
| WLALLRSVAG  | EQAPGTAPCSR       | TNR12_HUMAN |      |      | Tumor necrosis factor receptor superfamily            | 0.06                            | 0.00                  | 43.90                | 0.08  |
| CDEWGRRARR  | GVEVAAGASSGGETR   | TR19L_HUMAN |      |      | Tumor necrosis factor                                 | 0.34                            | 0.03                  | 68.30                | -2.17 |
| GTFVQRPCR   | DSPTTCGPCPPR      | TNF6B_HUMAN |      |      | Tumor necrosis factor receptor superfamily member 6B; | 6.07                            | 0.58                  | 43.00                | -1.89 |
| AALQLKLR    | LTELLGAQDGALLVR   | TNF6B_HUMAN |      |      | Tumor necrosis factor receptor superfamily            | 5.51                            | 0.45                  | 89.40                | 1.69  |
| RAALQLKLR   | RLTELLGAQDGALLVR  | TNF6B_HUMAN |      |      | Tumor necrosis factor receptor superfamily member 6B; | 5.43                            | 0.47                  | 61.90                | -0.80 |
| QDISIKRLQR  | LLQALEAPEGWGPTPR  | TNF6B_HUMAN |      |      | Tumor necrosis factor                                 | 5.02                            | 0.52                  | 75.80                | 1.30  |
| QFWNYLERCR  | YCNVLCGEREEEAR    | TNF6B_HUMAN |      |      | Tumor necrosis factor receptor superfamily member 6B; | 3.98                            | 0.39                  | 36.80                | -2.59 |
| PGTFVQRPCR  | RDSPTTCGPCPPR     | TNF6B_HUMAN |      |      | Tumor necrosis factor receptor superfamily member 6B; | 1.62                            | 0.06                  | 41.30                | -2.61 |
| ALLPVPVAVRG | VAETPTYPW         | TNF6B_HUMAN |      |      | Tumor necrosis factor receptor superfamily member 6B; | 1.20                            | 0.01                  | 29.70                | -4.38 |
| ISIKRLQRL   | QALEAPEGWGPTPR    | TNF6B_HUMAN |      |      | Tumor necrosis factor receptor superfamily            | 0.96                            | 0.07                  | 34.20                | -1.04 |
| ALPALLPVPA  | VRGVAETPTYPW      | TNF6B_HUMAN |      |      | Tumor necrosis factor receptor superfamily            | 0.90                            | 0.05                  | 38.30                | -4.53 |
| AEECERAVID  | FVAFQDISIKR       | TNF6B_HUMAN |      |      | Tumor necrosis factor                                 | 0.24                            | 0.02                  | 24.60                | -3.23 |
| FQDISIKRLQ  | RLQALEAPEGWGPTPR  | TNF6B_HUMAN |      |      | Tumor necrosis factor receptor superfamily            | 0.02                            | 0.00                  | 31.40                | -2.13 |

Table S5

| Non-prime  | Prime                    | Id 1        | Id 2 | Id 3 | Protein (Id1)                                      | Fold-change (log <sub>2</sub> ) | Fc standard deviation | X! Tandem hyperscore | ppm   |
|------------|--------------------------|-------------|------|------|----------------------------------------------------|---------------------------------|-----------------------|----------------------|-------|
| LCTSCTGFPL | STRVPGAEECER             | TNF6B_HUMAN |      |      | Tumor necrosis factor receptor superfamily         | -0.60                           | 0.04                  | 22.60                | -2.31 |
| LNSPNKGLLS | DSMTDVPVDTGVAAR          | TPD54_HUMAN |      |      | Tumor protein D54;                                 | 1.35                            | 0.14                  | 38.80                | -0.06 |
| NLVEGKRKRR | SNVSSPATPTASSSSSTPTR     | TP53B_HUMAN |      |      | Tumor suppressor p53-binding protein 1;            | 0.13                            | 0.01                  | 85.60                | 1.21  |
| LRQIKINEVQ | TDVGVDTKHQTLQGVAFPIR     | TWF1_HUMAN  |      |      | Twinfilin-1;                                       | 1.21                            | 0.13                  | 43.20                | -2.79 |
| QAFVHWQEPR | APLQGTLLGYR              | UFO_HUMAN   |      |      | Tyrosine-protein kinase receptor UFO;              | 6.07                            | 0.74                  | 49.70                | -1.31 |
| PLQGTLLGYR | LAYQGQDTPEVLMDIGLR       | UFO_HUMAN   |      |      | Tyrosine-protein kinase receptor UFO;              | 6.00                            | 0.62                  | 50.50                | -0.29 |
| HNAKGVTTSR | TATITVLPQQR              | UFO_HUMAN   |      |      | Tyrosine-protein kinase receptor UFO;              | 4.63                            | 0.34                  | 36.30                | -2.36 |
| GARGLTGTLR | CQLQVQGEPPEVHWLR         | UFO_HUMAN   |      |      | Tyrosine-protein kinase                            | 4.25                            | 0.23                  | 44.20                | -0.60 |
| GPPEPVDLLW | LQDAVPLATAPGHGPQR        | UFO_HUMAN   |      |      | Tyrosine-protein kinase                            | -0.76                           | 0.04                  | 43.90                | -3.06 |
| FVSQPGYVGL | EGLPYFLEEPEDR            | UFO_HUMAN   |      |      | Tyrosine-protein kinase receptor UFO;              | -3.66                           | 0.00                  | 27.90                | 1.90  |
| LASEHNTPVR | SEWSELQSQR               | PTN12_HUMAN |      |      | Tyrosine-protein phosphatase non-receptor          | 0.31                            | 0.03                  | 40.80                | -1.63 |
| DAFKTLFVAR | VNYDTTESKLR              | RU17_HUMAN  |      |      | U1 small nuclear ribonucleoprotein 70 kDa;         | -0.32                           | 0.02                  | 29.80                | -2.82 |
| ATKKAVQGGG | ATPVVGAVQGPVPGMPPMTQAPR  | SNRPA_HUMAN |      |      | U1 small nuclear                                   | -0.39                           | 0.02                  | 67.30                | -2.66 |
| MPKFYCDYCD | TYLTHDSPSVR              | RU1C_HUMAN  |      |      | U1 small nuclear                                   | -0.12                           | 0.01                  | 26.70                | -3.58 |
| RKPGMRPDWK | AGAGPGPPQKPAPSSQR        | UTP18_HUMAN |      |      | U3 small nucleolar RNA-associated protein 18       | 0.16                            | 0.01                  | 27.30                | -1.40 |
| AQEKKLRLAK | LYLEQLR                  | U3IP2_HUMAN |      |      | U3 small nucleolar RNA-interacting protein 2;      | 0.13                            | 0.01                  | 19.90                | -0.93 |
| VRADDLLPLG | DQTQDGDFGSR              | SNUT1_HUMAN |      |      | U4/U6.U5 tri-snRNP-associated protein 1;           | 1.36                            | 0.02                  | 35.90                | 2.14  |
| EKEVVVRADD | LLPLGDQTQDGDFGSR         | SNUT1_HUMAN |      |      | U4/U6.U5 tri-snRNP-                                | -2.16                           | 0.19                  | 28.60                | -1.71 |
| KSNSLISIKR | LTLQKAK                  | U520_HUMAN  |      |      | U5 small nuclear                                   | 14.30                           | 2.38                  | 26.40                | -0.59 |
| TARSLQYEYK | ANSNLVLQADR              | U520_HUMAN  |      |      | U5 small nuclear                                   | -0.34                           | 0.03                  | 49.10                | 4.07  |
| KRQRHELLLG | AGSGPGAGQQQATPGALLQAGPPI | SNR40_HUMAN |      |      | U5 small nuclear ribonucleoprotein 40 kDa protein; | -0.76                           | 0.05                  | 43.70                | 2.65  |



Table S5

| Non-prime   | Prime                     | Id 1        | Id 2 | Id 3 | Protein (Id1)                                     | Fold-change (log <sub>2</sub> ) | Fc standard deviation | X! Tandem hyperscore | ppm   |
|-------------|---------------------------|-------------|------|------|---------------------------------------------------|---------------------------------|-----------------------|----------------------|-------|
| VKRQRHELLL  | GAGSGPGAGQQQATPGALLQAGP   | SNR40_HUMAN |      |      | U5 small nuclear                                  | -0.79                           | 0.07                  | 35.30                | 0.48  |
| GMDTEAETVA  | TEAPARPVNACLEAEAAAAGAAAED | UBFD1_HUMAN |      |      | Ubiquitin domain-containing protein               | 0.84                            | 0.06                  | 53.40                | -2.47 |
| APARPVNACLE | AEAAAAGAAAEDSGAAR         | UBFD1_HUMAN |      |      | Ubiquitin domain-                                 | 0.00                            | 0.00                  | 95.20                | 0.91  |
| ENGKISRLRR  | ECPSDECGAGVFMASHFDR       | RS27A_HUMAN |      |      | Ubiquitin-40S ribosomal protein S27a;             | 1.86                            | 0.08                  | 38.80                | 0.55  |
| TKIFTASNV   | SVPLPAENVTTITAGQR         | UBP2L_HUMAN |      |      | Ubiquitin-associated                              | 0.79                            | 0.06                  | 63.10                | -0.30 |
| QSTTYTSQNN  | AQGPLYEQR                 | UBP2L_HUMAN |      |      | Ubiquitin-associated protein 2-like;              | 0.66                            | 0.07                  | 25.60                | -3.10 |
| MLQTRFPLDY  | YSIPFPTPTTPTLGR           | UBP2L_HUMAN |      |      | Ubiquitin-associated                              | 0.23                            | 0.01                  | 34.80                | -3.40 |
| IQSTTYTSQNN | NAQGPLYEQR                | UBP2L_HUMAN |      |      | Ubiquitin-associated protein 2-like;              | -1.04                           | 0.09                  | 33.90                | -1.00 |
| LKNMTVEQLL  | TGSPTSPTVEPEKPTR          | UBE2O_HUMAN |      |      | Ubiquitin-conjugating                             | 1.05                            | 0.09                  | 50.00                | -3.33 |
| ADDEAADTD   | DTSSVTSSASSTSSQSGSGTSR    | UBE2O_HUMAN |      |      | Ubiquitin-conjugating                             | -0.63                           | 0.09                  | 45.20                | -2.32 |
| DPKFVERTLR  | LAGTQPLEVLEAVQR           | UBA1_HUMAN  |      |      | Ubiquitin-like modifier-                          | 3.37                            | 0.31                  | 62.40                | -0.36 |
| AQHGRPPRPR  | NEEDAAELVALAQAVNAR        | UBA1_HUMAN  |      |      | Ubiquitin-like modifier-                          | 1.44                            | 0.07                  | 62.40                | 2.87  |
| DFIVAASNLR  | AENYDIPSADR               | UBA1_HUMAN  |      |      | Ubiquitin-like modifier-activating enzyme 1;      | 1.32                            | 0.05                  | 36.70                | -2.19 |
| LSAMVSMVTK  | DNPGVVTCLDEAR             | UBA1_HUMAN  |      |      | Ubiquitin-like modifier-activating enzyme 1;      | 0.91                            | 0.07                  | 61.70                | -2.03 |
| VLGPYTFSIC  | DTSNFSDYIR                | UBA1_HUMAN  |      |      | Ubiquitin-like modifier-                          | -6.27                           | 0.00                  | 27.50                | -7.34 |
| M           | IEVVCNDR                  | UBL5_HUMAN  |      |      | Ubiquitin-like protein 5;                         | 0.69                            | 0.02                  | 33.10                | 0.94  |
| ESSVSTPSAS  | FEPNNTCENSQSR             | UBXN4_HUMAN |      |      | UBX domain-containing                             | 0.67                            | 0.09                  | 48.00                | -0.93 |
| LHIYDPKVR   | EQIVVDLSHPGVSEDDQVSR      | UGDH_HUMAN  |      |      | UDP-glucose 6-dehydrogenase;                      | -0.04                           | 0.00                  | 40.50                | -7.22 |
| APDGNGGLYR  | ALAAQNIVEDMEQR            | UAP1_HUMAN  |      |      | UDP-N-acetylhexosamine                            | 1.26                            | 0.12                  | 68.00                | -2.34 |
| SGGVNLFAND  | GSFLELFKR                 | CS043_HUMAN |      |      | Uncharacterized protein C19orf43;                 | -0.16                           | 0.01                  | 21.90                | -1.97 |
| KIQNFLNEFK  | NIPEIVAVYSR               | CX038_HUMAN |      |      | Uncharacterized protein                           | 1.93                            | 0.10                  | 35.40                | -2.48 |
| TSEAAEMTDI  | TEQQQAAMQQEER             | MYO9A_HUMAN |      |      | Unconventional myosin-IXa;                        | 4.59                            | 0.55                  | 29.40                | -1.18 |
| NSGRAVTYSR  | SRYLECISCGSSDMSCER        | UPAR_HUMAN  |      |      | Urokinase plasminogen activator surface receptor; | 0.92                            | 0.11                  | 66.40                | -1.53 |
| VQRGFDSFLG  | RYQAVQEAVEDR              | UTRO_HUMAN  |      |      | Utrophin;                                         | -0.27                           | 0.02                  | 35.90                | -4.89 |

Table S5

| Non-prime  | Prime                    | Id 1        | Id 2       | Id 3       | Protein (Id1)                                    | Fold-change (log <sub>2</sub> ) | Fc standard deviation | X! Tandem hyperscore | ppm   |
|------------|--------------------------|-------------|------------|------------|--------------------------------------------------|---------------------------------|-----------------------|----------------------|-------|
| ASPTAAPES  | TSFPAPTSGMSHPPAAR        | RD23A_HUMAN |            |            | UV excision repair                               | 0.26                            | 0.00                  | 27.80                | -2.01 |
| ATTTATTTT  | SSGGHPLEFLR              | RD23B_HUMAN |            |            | UV excision repair                               | 0.67                            | 0.03                  | 27.00                | -7.08 |
| VAAAAATTTA | TTTTTSSGGHPLEFLR         | RD23B_HUMAN |            |            | protein RAD23 homolog                            | 0.55                            | 0.05                  | 34.50                | -2.54 |
| AVAAAAATTT | ATTTTTSSGGHPLEFLR        | RD23B_HUMAN |            |            | UV excision repair                               | 0.48                            | 0.03                  | 56.50                | -1.61 |
| TGAPQSSAVA | AAAATTTATTTTTSSGGHPLEFLR | RD23B_HUMAN |            |            | protein RAD23 homolog                            | 0.20                            | 0.02                  | 33.20                | -1.71 |
| LRAMRGIVNG | AAPELVPVPTGGPAVGAR       | VATB2_HUMAN |            |            | V-type proton ATPase                             | -0.06                           | 0.00                  | 57.60                | -4.72 |
| LAAAAAAAAA | EQQVPLVLWSSDR            | VAS1_HUMAN  |            |            | V-type proton ATPase subunit S1;                 | -0.04                           | 0.00                  | 62.40                | -0.63 |
| ATLQDRHERI | TKLAGVHALLR              | FFR_HUMAN   |            |            | Vacuolar protein sorting-                        | 10.36                           | 0.00                  | 25.70                | -5.91 |
| SPEEVEQQKR | QQPGPSEHIER              | VASP_HUMAN  |            |            | Vasodilator-stimulated                           | 2.17                            | 0.09                  | 23.30                | -3.67 |
| RMKSSSVTT  | SETQPCTPSSSDYSDLQR       | VASP_HUMAN  |            |            | Vasodilator-stimulated                           | 0.85                            | 0.06                  | 81.70                | -0.76 |
| PRPGPARRPY | AGGAAQLALDKSDSHPSDALTR   | ACADV_HUMAN |            |            | Very long-chain specific acyl-CoA dehydrogenase, | 0.37                            | 0.03                  | 41.50                | -2.95 |
| M          | VLLTMIAR                 | SC22B_HUMAN |            |            | Vesicle-trafficking protein SEC22b;              | 0.35                            | 0.03                  | 25.90                | -3.28 |
| AKQESTEYRR | QVQSLTCEVDALKGTNESLER    | VIME_HUMAN  |            |            | Vimentin;                                        | 4.99                            | 0.43                  | 39.90                | -1.40 |
| VDQLTNDKAR | VEVERDNLAEDIMR           | VIME_HUMAN  |            |            | Vimentin;                                        | 4.77                            | 0.28                  | 35.50                | -3.03 |
| EQLKGQKSR  | LGDLYEEEMR               | VIME_HUMAN  |            |            | Vimentin;                                        | 4.54                            | 0.22                  | 48.10                | -4.99 |
| ALDIEIATYR | KLLEGEESR                | VIME_HUMAN  | DESM_HUMAN | K2C7_HUMAN | Vimentin;                                        | 3.89                            | 0.20                  | 25.00                | -1.16 |
| KVELQELNDR | FANYIDKVR                | VIME_HUMAN  |            |            | Vimentin;                                        | 3.81                            | 0.43                  | 36.50                | 0.93  |
| AANYQDTIGR | LQDEIQNMKEEMAR           | VIME_HUMAN  |            |            | Vimentin;                                        | 3.08                            | 0.27                  | 40.80                | -3.18 |
| EKLQEMLQR  | EEAENTLQSFQRQVDNASLAR    | VIME_HUMAN  |            |            | Vimentin;                                        | 2.31                            | 0.18                  | 35.70                | -1.07 |
| EAENTLQSF  | QVDVDNASLAR              | VIME_HUMAN  |            |            | Vimentin;                                        | 2.04                            | 0.06                  | 39.70                | -2.42 |
| RKLEGEESR  | ISLPLPNFSSLNLR           | VIME_HUMAN  |            |            | Vimentin;                                        | 1.55                            | 0.16                  | 45.80                | -2.38 |
| EYRRQVQSLT | CEVDALKGTNESLER          | VIME_HUMAN  |            |            | Vimentin;                                        | 1.31                            | 0.12                  | 24.80                | 0.22  |

Table S5

| Non-prime  | Prime               | Id 1       | Id 2       | Id 3 | Protein (Id1) | Fold-change (log <sub>2</sub> ) | Fc standard deviation | X! Tandem hyperscore | ppm   |
|------------|---------------------|------------|------------|------|---------------|---------------------------------|-----------------------|----------------------|-------|
| EKLQEEMLQR | EEAENTLQSFR         | VIME_HUMAN |            |      | Vimentin;     | 1.02                            | 0.07                  | 47.00                | -0.22 |
| NTEFKNTRTN | EKVELQELNDR         | VIME_HUMAN | DESM_HUMAN |      | Vimentin;     | 1.01                            | 0.02                  | 42.70                | -2.59 |
| LQDSVDFSLA | DAINTEFKNTR         | VIME_HUMAN |            |      | Vimentin;     | 0.88                            | 0.09                  | 33.80                | -1.39 |
| LPNFSSLNLR | ETNLDLPLVDTHSK      | VIME_HUMAN |            |      | Vimentin;     | 0.87                            | 0.03                  | 28.40                | 1.04  |
| AINTEFKNTR | TNEKVELQELNDR       | VIME_HUMAN | DESM_HUMAN |      | Vimentin;     | 0.53                            | 0.05                  | 50.70                | -2.35 |
| LLQDSVDFSL | ADAINTEFKNTR        | VIME_HUMAN |            |      | Vimentin;     | 0.51                            | 0.04                  | 23.90                | -1.25 |
| LRPSTSRSLY | ASSPGGVYATR         | VIME_HUMAN |            |      | Vimentin;     | 0.47                            | 0.03                  | 44.60                | -0.82 |
| YRRQVQSLTC | EVDALKGTNESLER      | VIME_HUMAN |            |      | Vimentin;     | 0.29                            | 0.02                  | 33.60                | -4.23 |
| TNESLERQMR | EMEENFAVEAANYQDTIGR | VIME_HUMAN |            |      | Vimentin;     | 0.21                            | 0.02                  | 94.60                | -1.35 |
| EFKNTRTNEK | VELQELNDR           | VIME_HUMAN | DESM_HUMAN |      | Vimentin;     | 0.18                            | 0.01                  | 30.00                | -0.70 |
| QREEAENTLQ | SFRQDVDNASLAR       | VIME_HUMAN |            |      | Vimentin;     | 0.13                            | 0.01                  | 49.70                | -1.99 |
| IQEQHVQIDV | DVSKPDLTAALR        | VIME_HUMAN |            |      | Vimentin;     | 0.00                            | 0.00                  | 39.30                | -1.03 |
| GVRLQDSVD  | FSLADAINTEFKNTR     | VIME_HUMAN |            |      | Vimentin;     | -0.06                           | 0.00                  | 89.40                | -2.62 |
| QVQSLTCEVD | ALKGTNESLER         | VIME_HUMAN |            |      | Vimentin;     | -0.16                           | 0.02                  | 44.20                | 1.09  |
| EAEWYKSKF  | ADLSEAANR           | VIME_HUMAN |            |      | Vimentin;     | -0.18                           | 0.02                  | 37.20                | 0.41  |
| LPLVDTHSKR | LLIKTVETR           | VIME_HUMAN |            |      | Vimentin;     | -0.25                           | 0.02                  | 22.40                | -2.44 |
| NLQEAEEWYK | SKFADLSEAANR        | VIME_HUMAN |            |      | Vimentin;     | -0.32                           | 0.02                  | 54.00                | -2.76 |
| GSALRPSTSR | SLYASSPGGVYATR      | VIME_HUMAN |            |      | Vimentin;     | -0.47                           | 0.03                  | 41.20                | -2.05 |
| DQLTNDKARV | EVERDNLAEDIMR       | VIME_HUMAN |            |      | Vimentin;     | -0.60                           | 0.04                  | 46.40                | 0.74  |
| QEQHVQIDVD | VSKPDLTAALR         | VIME_HUMAN |            |      | Vimentin;     | -0.63                           | 0.05                  | 39.90                | -2.66 |
| QDSVDFSLAD | AINTEFKNTR          | VIME_HUMAN |            |      | Vimentin;     | -0.69                           | 0.03                  | 51.70                | -2.30 |
| ERQMREMEEN | FAVEAANYQDTIGR      | VIME_HUMAN |            |      | Vimentin;     | -0.79                           | 0.05                  | 40.40                | 1.96  |
| VRLQDSVDF  | SLADAINTEFKNTR      | VIME_HUMAN |            |      | Vimentin;     | -0.79                           | 0.05                  | 32.40                | -3.94 |

Table S5

| Non-prime  | Prime                | Id 1        | Id 2        | Id 3 | Protein (Id1)                                                       | Fold-change (log <sub>2</sub> ) | Fc standard deviation | X! Tandem hyperscore | ppm   |
|------------|----------------------|-------------|-------------|------|---------------------------------------------------------------------|---------------------------------|-----------------------|----------------------|-------|
| EMEENFAVEA | ANYQDTIGR            | VIME_HUMAN  |             |      | Vimentin;                                                           | -0.89                           | 0.03                  | 27.70                | -2.80 |
| QEAEWYKSK  | FADLSEAANR           | VIME_HUMAN  |             |      | Vimentin;                                                           | -0.89                           | 0.08                  | 29.20                | -4.52 |
| AENTLQSFQR | DVDNASLAR            | VIME_HUMAN  |             |      | Vimentin;                                                           | -1.20                           | 0.06                  | 41.00                | -1.21 |
| RLREKLQEEM | LQREEAENTLQSFQR      | VIME_HUMAN  |             |      | Vimentin;                                                           | -1.25                           | 0.12                  | 40.00                | -0.23 |
| ELEQLKGQK  | SRLGDLYEEEMR         | VIME_HUMAN  |             |      | Vimentin;                                                           | -1.44                           | 0.08                  | 45.10                | -2.22 |
| KLNQAKGWLR | DPSASPGDAGEQAIR      | VINC_HUMAN  |             |      | Vinculin;                                                           | 5.75                            | 1.05                  | 67.50                | 0.60  |
| PYRQDLLAKC | DRVDQLTAQLADLAAR     | VINC_HUMAN  |             |      | Vinculin;                                                           | 0.86                            | 0.05                  | 50.30                | -0.28 |
| VRPGYPKLR  | DVWGIEGPIDAAFTR      | VTNC_HUMAN  |             |      | Vitronectin;                                                        | 3.13                            | 0.31                  | 76.00                | -2.80 |
| EDFLGRLLA  | DDLFAAYFGPGSSRR      | VWA7_HUMAN  |             |      | von Willebrand factor A domain-containing protein                   | 3.17                            | 0.11                  | 27.30                | -4.44 |
| MQSRL      | LLLGAAPGGHGGPASR     | K0564_HUMAN |             |      | von Willebrand factor A VWFA and cache domain-containing protein 1; | 3.31                            | 0.15                  | 24.10                | -8.10 |
| CWLLGAGAEA | DFSILDEAQLASQMR      | CAHD1_HUMAN |             |      | WAS protein family                                                  | 0.38                            | 0.06                  | 63.90                | 0.32  |
| MQHSLAGQTY | AVPLIQPDLR           | WASH2_HUMAN | WASH3_HUMAN |      | WASH complex subunit                                                | 0.62                            | 0.06                  | 28.50                | -1.30 |
| MA         | VETLSPDWEFDR         | WASH7_HUMAN |             |      | WD repeat and HMG-box DNA-binding protein 1;                        | 1.43                            | 0.13                  | 26.50                | -6.24 |
| GSIHNLPLVT | SQRPFYDGPMPTR        | WDHD1_HUMAN |             |      | WD repeat-containing protein 82;                                    | 0.68                            | 0.02                  | 40.60                | -5.90 |
| SVLGGQDQLR | VRVTELEDEV           | WDR18_HUMAN |             |      | Wiskott-Aldrich syndrome protein family                             | -0.58                           | 0.03                  | 31.90                | -1.67 |
| M          | KLTDSVLR             | WDR82_HUMAN |             |      |                                                                     | 0.26                            | 0.02                  | 29.10                | -0.80 |
| QDITMRKAFR | SSTIQDQQLFDR         | WASF1_HUMAN |             |      |                                                                     | 0.65                            | 0.04                  | 35.30                | 1.49  |
| PPPAPQPQAR | SRLNATASLEQER        | WFS1_HUMAN  |             |      | Wolframin;                                                          | -0.89                           | 0.07                  | 38.80                | -2.58 |
| EQGGAHFSVS | SLAEGSVTSVGSVNPAENFR | XRCC5_HUMAN |             |      | X-ray repair cross-complementing protein 5;                         | 0.06                            | 0.00                  | 40.20                | -3.06 |
| GGFDISLFYR | DIISIAEDEDLR         | XRCC6_HUMAN |             |      | X-ray repair cross-complementing protein 6;                         | 6.38                            | 0.90                  | 59.10                | -3.81 |

Table S5

| Non-prime   | Prime                     | Id 1        | Id 2 | Id 3 | Protein (Id1)                                  | Fold-change (log <sub>2</sub> ) | Fc standard deviation | X! Tandem hyperscore | ppm   |
|-------------|---------------------------|-------------|------|------|------------------------------------------------|---------------------------------|-----------------------|----------------------|-------|
| IVEKLRFTYR  | SDSFENPVLQQHFR            | XRCC6_HUMAN |      |      | X-ray repair cross-complementing protein 6;    | 1.74                            | 0.08                  | 50.70                | -3.75 |
| IGKELQKQGR  | QEALEWLIR                 | XPP1_HUMAN  |      |      | Xaa-Pro aminopeptidase 1;                      | 3.09                            | 0.18                  | 25.90                | -4.38 |
| HSSPASLQLG  | AVSPGTLTPTGVVSGPAATPTAQHL | YAP1_HUMAN  |      |      | Yorkie homolog;                                | 0.28                            | 0.02                  | 69.40                | 0.48  |
| IITDFKEKTK  | SPPASSAASADQHSQSGSSSDNTEF | YAF2_HUMAN  |      |      | YY1-associated factor 2;                       | 0.23                            | 0.01                  | 43.40                | 2.96  |
| GGQAQSAASG  | AEQTEKADAPR               | ZBT17_HUMAN |      |      | Zinc finger and BTB                            | 5.86                            | 0.44                  | 29.80                | -4.16 |
| IKLEKALRVQ  | QSSESSTSSPSQHEATPGAR      | ZC11A_HUMAN |      |      | Zinc finger CCCH                               | 1.03                            | 0.09                  | 36.60                | -6.02 |
| STSAITISTS  | ATPTNTTNTNFANEDSHR        | ZC3HD_HUMAN |      |      | Zinc finger CCCH domain-containing protein 13; | 0.21                            | 0.02                  | 26.60                | -2.57 |
| PTSKPEGLSLH | SSPVGPPSSSKGSGPPPTEEEGER  | ZC3H4_HUMAN |      |      | Zinc finger CCCH domain-containing protein     | 0.34                            | 0.02                  | 27.40                | 0.94  |
| ILKTLRQQTS  | SRPPASVGLSSSSGLGDPR       | ZC3H4_HUMAN |      |      | Zinc finger CCCH domain-containing protein     | -0.25                           | 0.02                  | 48.50                | -1.90 |
| TLPAARSSLG  | SLQTPEAVTTR               | ZCCHV_HUMAN |      |      | Zinc finger CCCH-type antiviral protein 1;     | 0.21                            | 0.01                  | 29.00                | -0.65 |
| TPSPDQISHR  | ASLEDAPVDDLTR             | ZCCHV_HUMAN |      |      | Zinc finger CCCH-type antiviral protein 1;     | -0.18                           | 0.01                  | 48.90                | 1.26  |
| IECGQAFIQK  | AHLIVHQR                  | ZN175_HUMAN |      |      | Zinc finger protein 175;                       | -9.97                           | 0.00                  | 25.70                | 1.29  |
| IFRTASQRRCR | DPPSNPVAASPR              | Z280C_HUMAN |      |      | Zinc finger protein 280C;                      | 0.95                            | 0.03                  | 37.10                | -6.28 |
| ANTSSNVSNDF | FQEDNLCQSER               | ZN292_HUMAN |      |      | Zinc finger protein 292;                       | 4.37                            | 0.37                  | 26.50                | -2.06 |
| LSASTSSSCS  | TAATPGPVGLALPYAIPAR       | ZN598_HUMAN |      |      | Zinc finger protein 598;                       | 0.32                            | 0.02                  | 41.70                | -4.91 |
| NPHLSRHRKI  | HAGENSLR                  | ZN610_HUMAN |      |      | Zinc finger protein 610;                       | -2.25                           | 0.11                  | 24.00                | -0.11 |

Table S5

| Non-prime  | Prime                     | Id 1        | Id 2 | Id 3 | Protein (Id1)                                     | Fold-change (log <sub>2</sub> ) | Fc standard deviation | X! Tandem hyperscore | ppm   |
|------------|---------------------------|-------------|------|------|---------------------------------------------------|---------------------------------|-----------------------|----------------------|-------|
| TLAEKSRGLF | SANDWQCKTCSNVNWAR         | ZRAB2_HUMAN |      |      | Zinc finger Ran-binding domain-containing protein | 1.05                            | 0.10                  | 30.70                | 0.60  |
| LRHARWFQAR | ASGLQPCVIVIR              | ZFR2_HUMAN  |      |      | Zinc finger RNA-binding protein 2;                | 0.34                            | 0.02                  | 25.20                | -0.82 |
| VTPASLAALQ | SDVQPVGHDYVEEVR           | ZFR_HUMAN   |      |      | Zinc finger RNA-binding protein;                  | 0.79                            | 0.08                  | 58.20                | -3.41 |
| SEPVTPASLA | ALQSDVQPVGHDYVEEVR        | ZFR_HUMAN   |      |      | Zinc finger RNA-binding                           | 0.04                            | 0.01                  | 50.50                | 1.30  |
| LMQDMEHPQR | QNVAVNELCGR               | ZYX_HUMAN   |      |      | Zyxin;                                            | 4.65                            | 0.26                  | 29.80                | -1.63 |
| QVQLHVQSQT | QPVSLANTQPR               | ZYX_HUMAN   |      |      | Zyxin;                                            | 0.57                            | 0.04                  | 30.50                | -8.39 |
| EEAKGQVEAR | RESLDPVQEPGGQAEADGDVPGPI  | CGRE1_HUMAN |      |      |                                                   | 3.92                            | 0.41                  | 61.90                | 2.31  |
| AVIQHFQEKV | ESLEQEAAANER              | A4_HUMAN    |      |      |                                                   | 0.16                            | 0.01                  | 43.70                | -3.20 |
| EKRSTAPSAA | ASASASAAAASSPAGGGAEALELLE | TIF1B_HUMAN |      |      |                                                   | -0.66                           | 0.04                  | 75.10                | -1.18 |
