# Supplementary material for: Secretome and degradome profiling shows that Kallikrein‐related peptidases 4, 5, 6, and 7 induce TGFβ‐1 signaling in ovarian cancer cells
Source: PubMed Central journal article supplement — Mol Oncol. 2013 Oct 1;8(1):68–82. doi: 10.1016/j.molonc.2013.09.003 (PMC5528505; doi:10.1016/j.molonc.2013.09.003), 2013-10-01
Supplement: MOL2-8-068-s006.pdf [file MOL2-8-068-s006.pdf]

Table S6

Table S6 Analysis of N-termini that were unmodified upon secretome harvest and chemically dimethylated in the TAILS procedure (replicate 2).

This is a non-redundant, peptide-centric list, showing up to three proteins for each peptide identification.

The X! Tandem hyperscore and the mass deviation in ppm are shown.

The overall FDR is < 0.05 as calculated by PeptideProphet.

The prime sequence was experimentally identified, the corresponding non-prime sequence was bioinformatically derived.

The fold-change (Fc) value is based on ASAPratio.

| Non-prime  | Prime                     | Id 1        | Id 2 | Id 3 | Protein (Id1)                                | Fold-change (log <sub>2</sub> ) | Fc standard deviation | X! Tandem hyperscore | ppm  |
|------------|---------------------------|-------------|------|------|----------------------------------------------|---------------------------------|-----------------------|----------------------|------|
| M          | VQAWYMDDAPGDPR            | MTND_HUMAN  |      |      | 1,2-dihydroxy-3-keto-5-methylthiopentene     | 0.86                            | 0.05                  | 63.30                | 1.39 |
| M          | VDREQLVQKAR               | 1433G_HUMAN |      |      | 14-3-3 protein gamma;                        | -1.00                           | 0.08                  | 55.70                | 0.84 |
| ALLRPGLDR  | KIHIDL PNEQAR             | PRS10_HUMAN |      |      | 26S protease regulatory                      | 1.17                            | 0.05                  | 38.80                | 1.60 |
| PGTGKTLAK  | AVANQTSATFLR              | PRS4_HUMAN  |      |      | 26S protease regulatory subunit 4;           | 0.91                            | 0.05                  | 59.10                | 3.36 |
| ARIMQIHSRK | MNVSPDVNYEELAR            | PRS6A_HUMAN |      |      | 26S protease regulatory subunit 6A;          | 0.67                            | 0.06                  | 52.30                | 6.54 |
| IMQIHSRKMN | VSPDVNYEELAR              | PRS6A_HUMAN |      |      | 26S protease regulatory                      | 0.42                            | 0.04                  | 37.80                | 1.33 |
| QVKVIAATNR | VDILD PALLR               | PRS6A_HUMAN |      |      | 26S protease regulatory subunit 6A;          | 0.28                            | 0.02                  | 29.60                | 5.09 |
| ATVWDEAEQD | GIGEEVLKMSTEEIQR          | PRS6A_HUMAN |      |      | 26S protease regulatory subunit 6A;          | -0.72                           | 0.04                  | 60.10                | 3.55 |
| NVKVIMATNR | ADTLD PALLR PGR           | PRS6B_HUMAN |      |      | 26S protease regulatory                      | 0.28                            | 0.01                  | 23.30                | 2.10 |
| KCVAQASKNR | SLADFEKALTDYR             | PSD11_HUMAN |      |      | 26S proteasome non-ATPase regulatory subunit | 1.12                            | 0.08                  | 25.60                | 3.82 |
| M          | VLESTMVCVDNSEYMR          | PSMD4_HUMAN |      |      | 26S proteasome non-ATPase regulatory subunit | 0.74                            | 0.08                  | 89.30                | 6.07 |
| TEDSDDALLK | MTISQQEFGFR               | PSMD4_HUMAN |      |      | 26S proteasome non-                          | 0.30                            | 0.02                  | 35.90                | 3.10 |
| EDEEDDYQK  | RKGVEGLIDIENPNR           | HAP28_HUMAN |      |      | 28 kDa heat- and acid-                       | -0.62                           | 0.05                  | 52.20                | 3.31 |
| PQLSPAGKRY | LLSSAYVDSHKWEAR           | RT27_HUMAN  |      |      | 28S ribosomal protein S27, mitochondrial;    | 0.91                            | 0.06                  | 36.90                | 4.17 |
| SGWMPQAAPC | LSGAPQASAADV VVVHGR       | THIK_HUMAN  |      |      | 3-ketoacyl-CoA thiolase,                     | -1.24                           | 0.12                  | 48.90                | 6.16 |
| GEADRDTYRR | SAVPPGADKKA EAGAGSATEFQFR | RS10_HUMAN  |      |      | 40S ribosomal protein                        | 1.37                            | 0.11                  | 58.80                | 2.28 |
| RGEADRDTYR | RSVPPGADKKA EAGAGSATEFQF  | RS10_HUMAN  |      |      | 40S ribosomal protein                        | 1.05                            | 0.06                  | 41.30                | 2.43 |

Table S6

| Non-prime  | Prime                     | Id 1        | Id 2 | Id 3 | Protein (Id1)                    | Fold-change (log <sub>2</sub> ) | Fc standard deviation | X! Tandem hyperscore | ppm   |
|------------|---------------------------|-------------|------|------|----------------------------------|---------------------------------|-----------------------|----------------------|-------|
| GEFEIIDDHR | AGKIVVNLTR                | RS15A_HUMAN |      |      | 40S ribosomal protein S15a;      | 1.74                            | 0.13                  | 34.90                | -9.60 |
| IVRFLTVMK  | HGYIGEFEIIDDHR            | RS15A_HUMAN |      |      | 40S ribosomal protein S15a;      | 0.79                            | 0.07                  | 42.70                | -2.20 |
| QKYVDEASKK | EIKDILIQYDR               | RS16_HUMAN  |      |      | 40S ribosomal protein S19;       | 0.59                            | 0.04                  | 40.30                | 0.81  |
| MP         | GVTVKDVNQEFVR             | RS19_HUMAN  |      |      | 40S ribosomal protein S19;       | 0.20                            | 0.01                  | 39.30                | -1.07 |
| MAFK       | DTGKTPVEPEVAIHR           | RS20_HUMAN  |      |      | 40S ribosomal protein S20;       | 0.74                            | 0.05                  | 39.20                | 0.76  |
| MAFKD      | TGKTPVEPEVAIHR            | RS20_HUMAN  |      |      | 40S ribosomal protein S20;       | -0.55                           | 0.02                  | 33.60                | 0.50  |
| MQN        | DAGEFVDLYVPR              | RS21_HUMAN  |      |      | 40S ribosomal protein S21;       | -0.11                           | 0.01                  | 61.00                | 3.76  |
| MQND       | AGEFVDLYVPR               | RS21_HUMAN  |      |      | 40S ribosomal protein S21;       | -1.14                           | 0.08                  | 36.70                | 2.23  |
| IIRNVKGPVR | EGDVLTLLESER              | RS28_HUMAN  |      |      | 40S ribosomal protein S28;       | 0.50                            | 0.12                  | 51.80                | 3.02  |
| M          | GHQQLYWSHPR               | RS29_HUMAN  |      |      | 40S ribosomal protein S29;       | 0.86                            | 0.05                  | 44.70                | 2.36  |
| RKQVADGIFK | AELNEFLTR                 | RS3_HUMAN   |      |      | 40S ribosomal protein S3;        | 1.20                            | 0.10                  | 36.50                | 2.66  |
| YEKRMATEVA | ADALGEEWKGYVVR            | RS6_HUMAN   |      |      | 40S ribosomal protein S6;        | -0.07                           | 0.00                  | 30.70                | 5.17  |
| MNSDLKAQLR | ELNITAAKEIEVGGGR          | RS7_HUMAN   |      |      | 40S ribosomal protein S7;        | 0.84                            | 0.06                  | 31.30                | -0.46 |
| RNTGQRAVLK | FAAATGATPIAGR             | RSSA_HUMAN  |      |      | 40S ribosomal protein SA;        | 0.64                            | 0.06                  | 51.30                | 1.87  |
| EMRMQNNSSP | SISPNTSFTSDGSPSPLGGIKR    | XRN2_HUMAN  |      |      | 5'-3' exoribonuclease 2;         | 0.40                            | 0.02                  | 56.10                | 4.82  |
| AAYEMRMQNN | SSPSISPNTSFTSDGSPSPLGGIKR | XRN2_HUMAN  |      |      | 5'-3' exoribonuclease 2;         | -0.40                           | 0.03                  | 35.20                | -0.75 |
| LVIQQVFDNG | SIYNPEVLDITEETLHSR        | RLA0_HUMAN  |      |      | 60S acidic ribosomal protein P0; | 0.67                            | 0.04                  | 81.80                | 2.00  |

Table S6

| Non-prime  | Prime                | Id 1        | Id 2       | Id 3 | Protein (Id1)                     | Fold-change (log <sub>2</sub> ) | Fc standard deviation | X! Tandem hyperscore | ppm   |
|------------|----------------------|-------------|------------|------|-----------------------------------|---------------------------------|-----------------------|----------------------|-------|
| IQQVFDNGSI | YNPEVLDITEETLHSR     | RLA0_HUMAN  |            |      | 60S acidic ribosomal protein P0;  | -2.24                           | 0.11                  | 33.80                | 4.71  |
| HISKKWGFTK | FNADEFEDMVAEKR       | RL10_HUMAN  |            |      | 60S ribosomal protein L10;        | -0.88                           | 0.08                  | 28.90                | 5.80  |
| VGESGDLRTR | AAKVLEQLTGQTPVFSKAR  | RL11_HUMAN  |            |      | 60S ribosomal protein             | 0.54                            | 0.04                  | 41.10                | 1.41  |
| SGDRLTRAAK | VLEQLTGQTPVFSKAR     | RL11_HUMAN  |            |      | 60S ribosomal protein             | 0.43                            | 0.03                  | 26.90                | -0.98 |
| KGDSSAEELK | LATQLTGPVMPVR        | RL13_HUMAN  |            |      | 60S ribosomal protein L13;        | 0.46                            | 0.04                  | 44.20                | 2.96  |
| ISVDPRRRNK | STESLQANVQR          | RL13_HUMAN  |            |      | 60S ribosomal protein L13;        | 0.04                            | 0.01                  | 59.50                | 2.60  |
|            | M GAYKYIQELWR        | RL15_HUMAN  |            |      | 60S ribosomal protein             | 1.09                            | 0.03                  | 41.90                | 1.47  |
| KMKLPGRENK | TAVVVGTITDDVR        | RL18_HUMAN  |            |      | 60S ribosomal protein L18;        | 0.54                            | 0.05                  | 72.10                | 3.84  |
| GTHNMYREYR | DLTTAGAVTQCYR        | RL18A_HUMAN |            |      | 60S ribosomal protein L18a;       | 0.67                            | 0.07                  | 67.80                | 2.96  |
|            | M KFNPFVTSDR         | RL26L_HUMAN | RL26_HUMAN |      | 60S ribosomal protein L26-like 1; | 0.33                            | 0.02                  | 32.00                | 0.64  |
| QTRVNAAKNK | TGAAPIIDVVR          | RL27A_HUMAN |            |      | 60S ribosomal protein L27a;       | 0.61                            | 0.06                  | 47.30                | 6.37  |
| FRYNGLIHRK | TVGVEPAADGKGVVVVIKR  | RL28_HUMAN  |            |      | 60S ribosomal protein             | 1.03                            | 0.04                  | 45.90                | 0.40  |
| RRALEKIDLK | FIDTTSKFGHGR         | RL3L_HUMAN  | RL3_HUMAN  |      | 60S ribosomal protein L3-         | 1.06                            | 0.11                  | 54.60                | 7.80  |
| KKGGEKKKGR | SAINEVVTR            | RL31_HUMAN  |            |      | 60S ribosomal protein L31;        | 0.30                            | 0.03                  | 40.60                | 1.17  |
| AKKGGEKKKG | RSAINVVTR            | RL31_HUMAN  |            |      | 60S ribosomal protein             | -0.49                           | 0.05                  | 32.40                | 2.46  |
| RGKKKEELLK | QLDDLKVELSQLR        | RL35_HUMAN  |            |      | 60S ribosomal protein             | -0.04                           | 0.00                  | 24.70                | 5.90  |
| KSNYNLPMHK | MINTDLR              | RL4_HUMAN   |            |      | 60S ribosomal protein L4;         | 0.86                            | 0.09                  | 23.70                | 0.51  |
| FKKKKLRKPR | HQEGEIFDTEKEKYEITEQR | RL6_HUMAN   |            |      | 60S ribosomal protein L6;         | 0.18                            | 0.01                  | 38.00                | 3.63  |
| RGYGKINKKR | IALTDNALIAR          | RL7_HUMAN   |            |      | 60S ribosomal protein L7;         | 4.37                            | 0.39                  | 45.00                | 1.83  |
| QRLLARAEKK | AAGKGDVPTKRPPVLR     | RL7A_HUMAN  |            |      | 60S ribosomal protein             | 1.18                            | 0.08                  | 23.00                | 7.76  |
| SKKVISSANR | AVVGVVAGGGR          | RL8_HUMAN   |            |      | 60S ribosomal protein L8;         | 0.94                            | 0.07                  | 48.30                | 2.16  |
| KPGDRGKLAR | ASGNYATVISHNPETKKTR  | RL8_HUMAN   |            |      | 60S ribosomal protein L8;         | 0.67                            | 0.05                  | 46.30                | 3.29  |

Table S6

| Non-prime   | Prime                       | Id 1        | Id 2       | Id 3        | Protein (Id1)                                    | Fold-change (log <sub>2</sub> ) | Fc standard deviation | X! Tandem hyperscore | ppm   |
|-------------|-----------------------------|-------------|------------|-------------|--------------------------------------------------|---------------------------------|-----------------------|----------------------|-------|
| M           | KTILSNQTVDIPENV DITLKGR     | RL9_HUMAN   |            |             | 60S ribosomal protein L9;                        | 0.42                            | 0.02                  | 46.50                | 4.08  |
| GTIAGLNVMR  | IINEPTAAAIAYGLDKR           | GRP78_HUMAN |            |             | 78 kDa glucose-regulated protein;                | 4.35                            | 0.34                  | 47.90                | 3.15  |
| EIIANDQGNR  | ITPSYVAFTPEGER              | GRP78_HUMAN |            |             | 78 kDa glucose-regulated A-kinase anchor protein | 0.68                            | 0.06                  | 50.10                | 4.57  |
| SKELSESQVH  | MMAAAVADGTR                 | AKA12_HUMAN |            |             | 12;                                              | 1.73                            | 0.17                  | 43.50                | 0.27  |
| EPLQVEAEA   | ALLTEEVLER                  | AKA12_HUMAN |            |             | A-kinase anchor protein                          | 1.41                            | 0.10                  | 40.00                | 1.57  |
| ISASVTEPLE  | QVEAEAALLTEEVLER            | AKA12_HUMAN |            |             | A-kinase anchor protein                          | 0.91                            | 0.13                  | 85.90                | 1.91  |
| KDVPFEGLE   | GSIDTGITVSR                 | AKA12_HUMAN |            |             | A-kinase anchor protein                          | 0.66                            | 0.06                  | 52.30                | 1.67  |
| QERRTQEV LQ | AVA EKVK EESQLPGTGGPEDV LQP | AKA12_HUMAN |            |             | A-kinase anchor protein                          | 0.17                            | 0.01                  | 37.80                | 3.05  |
| RTQEV LQAVA | EKVKEESQLPGTGGPEDV LQP VQF  | AKA12_HUMAN |            |             | A-kinase anchor protein                          | -0.34                           | 0.01                  | 48.60                | 3.60  |
| MN          | AGSDPVVIVSAAR               | THIC_HUMAN  |            |             | Acetyl-CoA                                       | 0.97                            | 0.04                  | 46.90                | -0.47 |
| QEIRYVERSY  | VSKPTLKEVVIVSATR            | THIL_HUMAN  |            |             | Acetyl-CoA acetyltransferase,                    | 0.02                            | 0.00                  | 41.10                | 7.43  |
| VEWIIIDPEG  | FTENGWEIVHRPAR              | ACHD_HUMAN  |            |             | Acetylcholine receptor subunit delta;            | 3.79                            | 0.27                  | 31.10                | 8.18  |
| KTGVSKPIVK  | STLSQTVPSKGELSR             | ANLN_HUMAN  |            |             | Actin-binding protein                            | 1.70                            | 0.08                  | 32.80                | 3.58  |
| DDGSTLMEID  | GDKGKQGGPTYIIDTNALR         | ACL6A_HUMAN |            |             | Actin-like protein 6A;                           | -0.88                           | 0.08                  | 48.30                | 1.90  |
| M           | ILLEVNNR                    | ARPC2_HUMAN |            |             | Actin-related protein 2/3 complex subunit 2;     | 0.13                            | 0.01                  | 37.20                | 1.85  |
| VFPSIVGRPR  | HQGV MVGMGQKDSYVGDEAQSK     | ACTA_HUMAN  | ACTB_HUMAN | ACTC_HUMAN  | Actin, aortic smooth muscle;                     | 0.96                            | 0.09                  | 66.60                | 1.88  |
| AGFAGDDAPR  | AVFPSIVGR                   | ACTB_HUMAN  | ACTA_HUMAN | ACTC_HUMAN  | Actin, cytoplasmic 1;                            | 2.05                            | 0.08                  | 34.10                | 0.72  |
| AGFAGDDAPR  | AVFPSIVGRPR                 | ACTB_HUMAN  | ACTA_HUMAN | ACTBM_HUMAN | Actin, cytoplasmic 1;                            | 1.64                            | 0.04                  | 22.40                | 5.05  |
| WHHTFYNELR  | VAPEEHPVLLTEAPLNPKANR       | ACTB_HUMAN  | ACTG_HUMAN |             | Actin, cytoplasmic 1;                            | 0.96                            | 0.06                  | 59.40                | 1.31  |
| YPGIADRMQK  | EITALAPSTMKIKIIPPER         | ACTB_HUMAN  | ACTA_HUMAN | ACTC_HUMAN  | Actin, cytoplasmic 1;                            | 0.78                            | 0.05                  | 33.90                | 4.51  |

Table S6

| Non-prime  | Prime                      | Id 1       | Id 2        | Id 3        | Protein (Id1)         | Fold-change (log <sub>2</sub> ) | Fc standard deviation | X! Tandem hyperscore | ppm  |
|------------|----------------------------|------------|-------------|-------------|-----------------------|---------------------------------|-----------------------|----------------------|------|
| DYLMKILTER | GYSFTTTAER                 | ACTB_HUMAN | ACTG_HUMAN  |             | Actin, cytoplasmic 1; | 0.61                            | 0.06                  | 36.90                | 1.88 |
| DFEQEMATVA | SSSSLEKSYELPDGQVITIGNER    | ACTB_HUMAN | ACTA_HUMAN  | ACTC_HUMAN  | Actin, cytoplasmic 1; | 0.45                            | 0.03                  | 75.20                | 3.84 |
| VIDNGSGMCK | AGFAGDDAPR                 | ACTB_HUMAN | ACTA_HUMAN  | ACTC_HUMAN  | Actin, cytoplasmic 1; | 0.43                            | 0.02                  | 27.40                | 7.32 |
| VDIRKDLYAN | TVLSGGTTMYPGIADR           | ACTB_HUMAN | ACTG_HUMAN  |             | Actin, cytoplasmic 1; | 0.43                            | 0.04                  | 85.30                | 6.03 |
| FEQEMATVAS | SSSLEKSYELPDGQVITIGNER     | ACTB_HUMAN | ACTA_HUMAN  | ACTC_HUMAN  | Actin, cytoplasmic 1; | 0.38                            | 0.02                  | 62.90                | 3.65 |
| LYANNVMSGG | TTMYPGIADR                 | ACTB_HUMAN | ACTA_HUMAN  | ACTC_HUMAN  | Actin, cytoplasmic 1; | 0.35                            | 0.03                  | 27.30                | 2.50 |
| TVASSSSLEK | SYELPDGQVITIGNER           | ACTB_HUMAN | ACTA_HUMAN  | ACTBL_HUMAN | Actin, cytoplasmic 1; | 0.30                            | 0.01                  | 93.40                | 3.45 |
| VMDSGDGVTH | TVPIYEGYALPHAILR           | ACTB_HUMAN | ACTG_HUMAN  |             | Actin, cytoplasmic 1; | 0.30                            | 0.01                  | 67.30                | 2.16 |
| QEMATVASSS | SLEKSYELPDGQVITIGNER       | ACTB_HUMAN | ACTA_HUMAN  | ACTC_HUMAN  | Actin, cytoplasmic 1; | 0.22                            | 0.01                  | 75.80                | 1.73 |
| IRKDLYANNV | LSGGTTMYPGIADR             | ACTB_HUMAN | ACTA_HUMAN  | ACTC_HUMAN  | Actin, cytoplasmic 1; | 0.17                            | 0.02                  | 51.60                | 5.02 |
| VALDFEQEMA | TAASSSSLEKSYELPDGQVITIGNEI | ACTB_HUMAN | ACTA_HUMAN  | ACTC_HUMAN  | Actin, cytoplasmic 1; | 0.15                            | 0.01                  | 86.80                | 5.23 |
| VAPEEHPI   | TEAPLNPKANR                | ACTB_HUMAN | ACTA_HUMAN  | ACTBM_HUMAN | Actin, cytoplasmic 1; | 0.11                            | 0.01                  | 24.60                | 2.34 |
| EMATVASSSS | LEKSYELPDGQVITIGNER        | ACTB_HUMAN | ACTA_HUMAN  | ACTC_HUMAN  | Actin, cytoplasmic 1; | 0.09                            | 0.00                  | 62.30                | 4.12 |
| EQEMATVASS | SSLEKSYELPDGQVITIGNER      | ACTB_HUMAN | ACTA_HUMAN  | ACTC_HUMAN  | Actin, cytoplasmic 1; | 0.00                            | 0.00                  | 53.60                | 3.09 |
| SGRTTGIVMD | SGDGVTHTVPIYEGYALPHAILR    | ACTB_HUMAN | ACTG_HUMAN  |             | Actin, cytoplasmic 1; | -0.11                           | 0.01                  | 45.00                | 2.08 |
| YANNVMSGGT | TMYPGIADR                  | ACTB_HUMAN | ACTA_HUMAN  | ACTBL_HUMAN | Actin, cytoplasmic 1; | -0.26                           | 0.02                  | 28.00                | 4.75 |
| LRVAPEEHPI | LLTEAPLNPKANR              | ACTB_HUMAN | ACTA_HUMAN  | ACTBM_HUMAN | Actin, cytoplasmic 1; | -0.58                           | 0.04                  | 24.20                | 2.99 |
|            | SLEKSYELPDGQVITIGNER       | ACTB_HUMAN | ACTA_HUMAN  | ACTBL_HUMAN | Actin, cytoplasmic 1; | -0.69                           | 0.07                  | 40.90                | 1.52 |
| DIRKDLYANN | VLSGGTTMYPGIADR            | ACTB_HUMAN | ACTA_HUMAN  | ACTC_HUMAN  | Actin, cytoplasmic 1; | -1.29                           | 0.13                  | 38.30                | 6.93 |
| SGDGVTHTVP | IYEGYALPHAILR              | ACTB_HUMAN | ACTBL_HUMAN | ACTG_HUMAN  | Actin, cytoplasmic 1; | -1.87                           | 0.07                  | 51.00                | 0.39 |

Table S6

| Non-prime   | Prime                | Id 1        | Id 2        | Id 3        | Protein (Id1)                                 | Fold-change (log <sub>2</sub> ) | Fc standard deviation | X! Tandem hyperscore | ppm   |
|-------------|----------------------|-------------|-------------|-------------|-----------------------------------------------|---------------------------------|-----------------------|----------------------|-------|
| MATVASSSSL  | EKSYELPDGQVITIGNER   | ACTB_HUMAN  | ACTA_HUMAN  | ACTBM_HUMAN | Actin, cytoplasmic 1;                         | -2.05                           | 0.09                  | 34.90                | 6.99  |
| TTGIVMDSGD  | GVTHTVPIYEGYALPHAILR | ACTB_HUMAN  | ACTG_HUMAN  |             | Actin, cytoplasmic 1;                         | -2.24                           | 0.11                  | 29.70                | 0.58  |
| GAASQKKAFR  | SSGFGLEFNSFQHQLR     | TRIP4_HUMAN |             |             | Activating signal cointegrator 1;             | 1.06                            | 0.07                  | 35.90                | 6.00  |
| IVEERADATN  | VNNWHWTER            | AHSA1_HUMAN |             |             | Activator of 90 kDa heat shock protein ATPase | 0.81                            | 0.02                  | 28.50                | 0.39  |
| PRWIVEERAD  | ATNVNNWHWTER         | AHSA1_HUMAN |             |             | Activator of 90 kDa heat shock protein ATPase | -1.14                           | 0.05                  | 34.40                | 0.70  |
| GRVTQLCRQY  | SDMPPLTLEGIQDR       | ACPM_HUMAN  |             |             | Acyl carrier protein, mitochondrial;          | 0.02                            | 0.00                  | 71.70                | 1.06  |
| GQIIRVPARM  | AATLILEPAGR          | ACOT1_HUMAN | ACOT2_HUMAN |             | Acyl-coenzyme A thioesterase 1;               | 1.19                            | 0.12                  | 37.70                | 1.31  |
| MERQVLL     | SEPEEAAALYR          | ACPH_HUMAN  |             |             | Acylamino-acid-releasing enzyme;              | 0.76                            | 0.04                  | 48.20                | 10.07 |
| NDSLSSLDLFD | DDDVDLSR             | APC_HUMAN   |             |             | Adenomatous polyposis                         | -3.24                           | 0.31                  | 21.40                | 7.84  |
| MSDKLPYK    | VADIGLAAWGR          | SAHH_HUMAN  |             |             | Adenosylhomocysteinase;                       | 0.63                            | 0.05                  | 39.40                | 2.59  |
| DIGLAAWGRK  | ALDIAENEMPGLMR       | SAHH_HUMAN  |             |             | Adenosylhomocysteinase;                       | 0.60                            | 0.05                  | 67.40                | 3.14  |
| RATDVMIAGK  | VAVVAGYGDVGKGAQALR   | SAHH_HUMAN  |             |             | Adenosylhomocysteinase;                       | 0.40                            | 0.04                  | 30.60                | 6.48  |
| M           | APSVPAAEPEYPKGIR     | KAD2_HUMAN  |             |             | Adenylate kinase 2, mitochondrial;            | -0.04                           | 0.00                  | 27.00                | 0.06  |
| MAP         | SVPAAEPEYPKGIR       | KAD2_HUMAN  |             |             | Adenylate kinase 2,                           | -1.00                           | 0.08                  | 21.50                | 2.59  |
| IKKRLETYYK  | ATEPVIAFYEKR         | KAD1_HUMAN  |             |             | Adenylate kinase                              | 0.15                            | 0.01                  | 17.90                | 2.43  |
| LALAVGCVFL  | LEPELPGSALR          | ADPGK_HUMAN |             |             | ADP-dependent glucokinase;                    | 1.11                            | 0.08                  | 33.90                | 2.23  |
| FLALAVGCVF  | LLEPELPGSALR         | ADPGK_HUMAN |             |             | ADP-dependent glucokinase;                    | 0.72                            | 0.07                  | 33.40                | 2.34  |
| AIQLVSLGGR  | QLLTPEHVLR           | AGRIN_HUMAN |             |             | Agrin;                                        | 7.32                            | 0.57                  | 28.20                | -0.16 |
| VGAGLRGCIR  | LLDVNNQR             | AGRIN_HUMAN |             |             | Agrin;                                        | 4.00                            | 0.17                  | 26.40                | -0.50 |
| IRLLDVNNQR  | LELGIGPGAATR         | AGRIN_HUMAN |             |             | Agrin;                                        | 3.54                            | 0.30                  | 41.00                | 2.28  |

Table S6

| Non-prime  | Prime              | Id 1        | Id 2        | Id 3        | Protein (Id1)                              | Fold-change (log <sub>2</sub> ) | Fc standard deviation | X! Tandem hyperscore | ppm   |
|------------|--------------------|-------------|-------------|-------------|--------------------------------------------|---------------------------------|-----------------------|----------------------|-------|
| DLGKGAAVIR | SREPVTLGAWTR       | AGRIN_HUMAN |             |             | Agrin;                                     | 1.59                            | 0.06                  | 56.70                | -0.14 |
| PHCEKGLVEK | SAGDVTDLAFDGR      | AGRIN_HUMAN |             |             | Agrin;                                     | -1.59                           | 0.10                  | 52.30                | -2.96 |
| RRLDALSRGR | LLHQLADLVER        | AL1A3_HUMAN |             |             | Aldehyde dehydrogenase family 1 member A3; | 2.18                            | 0.28                  | 33.90                | 3.89  |
| IKAIAAKHNK | TTAQVLIR           | AK1BF_HUMAN | ALDR_HUMAN  |             | Aldo-keto reductase family 1 member B15;   | 0.26                            | 0.02                  | 29.50                | 0.85  |
| LGLRLQLSLG | IIPVEEENPDFWNR     | PPB1_HUMAN  | PPBN_HUMAN  |             | Alkaline phosphatase, Alpha-1-             | 0.00                            | 0.00                  | 73.00                | 6.04  |
| AAGFCPAVLC | HPNSPLDEENLTQENQDR | AACT_HUMAN  |             |             | antichymotrypsin;                          | 1.67                            | 0.08                  | 76.30                | 1.43  |
| ILTLVVAACG | FVLWSSNGR          | MGAT2_HUMAN |             |             | Alpha-1,6-mannosylglycoprotein 2-beta-N-   | 1.95                            | 0.10                  | 27.40                | 0.91  |
| VTFGFIWGMM | LLHFTIQQR          | MGT5A_HUMAN |             |             | Alpha-1,6-mannosylglycoprotein 6-          | 0.28                            | 0.02                  | 27.90                | 2.19  |
| HTNYTMEHIR | VGWEQLLTTIAR       | ACTN1_HUMAN | ACTN4_HUMAN |             | Alpha-actinin-1;                           | 4.67                            | 0.70                  | 48.80                | 1.41  |
| WEQLLTTIAR | TINEVENQILTR       | ACTN1_HUMAN | ACTN4_HUMAN |             | Alpha-actinin-1;                           | 2.37                            | 0.24                  | 67.30                | 0.21  |
| HLMEDYEKLA | SDLLEWIR           | ACTN1_HUMAN | ACTN4_HUMAN |             | Alpha-actinin-1;                           | -0.21                           | 0.01                  | 32.60                | -0.19 |
| QHLEQAEKGY | EEWLLNEIR          | ACTN1_HUMAN | ACTN2_HUMAN | ACTN4_HUMAN | Alpha-actinin-1;                           | -5.06                           | 1.69                  | 35.10                | 6.79  |
| LLNEIRRLER | LEHLAEKFR          | ACTN2_HUMAN |             |             | Alpha-actinin-2;                           | 6.64                            | 0.75                  | 29.50                | 1.83  |
| TADQVIASFK | VLAGDKNFITAELR     | ACTN4_HUMAN |             |             | Alpha-actinin-4;                           | 0.90                            | 0.07                  | 25.80                | 2.60  |
| EIGRISIEMN | GTLEDQLSHLKQYER    | ACTN4_HUMAN |             |             | Alpha-actinin-4;                           | -0.32                           | 0.02                  | 40.20                | 2.44  |
| NIQNFTTSWR | DGLAFNALIHR        | ACTN4_HUMAN | SPTN4_HUMAN |             | Alpha-actinin-4;                           | -0.65                           | 0.04                  | 48.00                | 0.55  |
| NTRCQKICDQ | WDALGSLTHSR        | ACTN4_HUMAN |             |             | Alpha-actinin-4;                           | -2.14                           | 0.19                  | 36.20                | 4.46  |
| LAFNALIHRH | RPELIEYDKLR        | ACTN4_HUMAN |             |             | Alpha-actinin-4;                           | -2.24                           | 0.21                  | 49.60                | 1.20  |
| KAIMTYVSSF | YHAFSGAQKAETAANR   | ACTN4_HUMAN | ACTN1_HUMAN |             | Alpha-actinin-4;                           | -3.24                           | 0.31                  | 34.70                | 3.01  |
| GRLGVSLSKG | LHHKAVLAVR         | AASS_HUMAN  |             |             | Alpha-aminoadipic semialdehyde synthase,   | 8.88                            | 1.39                  | 26.20                | 7.66  |

Table S6

| Non-prime  | Prime                    | Id 1        | Id 2        | Id 3       | Protein (Id1)            | Fold-change (log <sub>2</sub> ) | Fc standard deviation | X! Tandem hyperscore | ppm   |
|------------|--------------------------|-------------|-------------|------------|--------------------------|---------------------------------|-----------------------|----------------------|-------|
| DLYTAKGLFR | AAVPSGASTGIYEALELR       | ENOA_HUMAN  | ENOB_HUMAN  | ENOG_HUMAN | Alpha-enolase;           | 0.92                            | 0.05                  | 107.80               | 5.89  |
| FRAAVPSGAS | TGIYEALELR               | ENOA_HUMAN  | ENOB_HUMAN  | ENOG_HUMAN | Alpha-enolase;           | -0.09                           | 0.00                  | 32.90                | 4.58  |
| WGAWQKFTAS | AGIQVVGDDLTVTNPKR        | ENOA_HUMAN  |             |            | Alpha-enolase;           | -0.43                           | 0.05                  | 51.30                | 2.27  |
| QDDWGAWQKF | TASAGIQVVGDDLTVTNPKR     | ENOA_HUMAN  |             |            | Alpha-enolase;           | -0.55                           | 0.03                  | 79.50                | 1.10  |
| DWGAWQKFTA | SAGIQVVGDDLTVTNPKR       | ENOA_HUMAN  |             |            | Alpha-enolase;           | -0.58                           | 0.03                  | 70.00                | 2.37  |
| KFGANAILGV | SLAVCKAGAVEKGVPLYR       | ENOA_HUMAN  |             |            | Alpha-enolase;           | -0.80                           | 0.06                  | 25.90                | 2.92  |
| WQKFTASAGI | QVVGDDLTVTNPKR           | ENOA_HUMAN  |             |            | Alpha-enolase;           | -1.65                           | 0.10                  | 36.90                | 0.62  |
| GAWQKFTASA | GIQVVGDDLTVTNPKR         | ENOA_HUMAN  |             |            | Alpha-enolase;           | -2.05                           | 0.42                  | 28.30                | 1.46  |
| KAGYTDKVI  | GMDVAASEFFR              | ENOA_HUMAN  |             |            | Alpha-enolase;           | -3.72                           | 0.49                  | 44.10                | 1.42  |
| SLLAAPPVAP | AEAPHLVHVDAAR            | IDUA_HUMAN  |             |            | Alpha-L-iduronidase;     | 0.15                            | 0.01                  | 72.60                | 0.28  |
| NTWLSTGWFT | MTIALELCDR               | SIA7E_HUMAN |             |            | Alpha-N-                 | -6.06                           | 0.00                  | 24.50                | 5.65  |
| VILFALITIL | ILYSSNSANEFHYGSLR        | SIA7F_HUMAN |             |            | Alpha-N-                 | 0.99                            | 0.06                  | 35.00                | 3.25  |
| RALTPAATLS | AVQNLVVEGLR              | STALP_HUMAN |             |            | AMSH-like protease;      | -1.80                           | 0.13                  | 34.00                | 0.41  |
| RALEVPTDGN | AGLLAEPQIAMFCGR          | A4_HUMAN    |             |            | Amyloid beta A4 protein; | 1.68                            | 0.18                  | 58.30                | 0.24  |
| LLAAWTARAL | EVPTDGNAGLLAEPQIAMFCGR   | A4_HUMAN    |             |            | Amyloid beta A4 protein; | 1.62                            | 0.10                  | 98.60                | 1.39  |
| LEVPTDGNAG | LLAEPQIAMFCGR            | A4_HUMAN    |             |            | Amyloid beta A4 protein; | 1.48                            | 0.17                  | 54.80                | 6.19  |
| LLLAAWTARA | LEVPTDGNAGLLAEPQIAMFCGR  | A4_HUMAN    |             |            | Amyloid beta A4 protein; | 0.74                            | 0.12                  | 101.70               | 5.18  |
| LLLRAQPAIG | SLAGGSPGAAEAPGSAQVAGLCGF | APLP1_HUMAN |             |            | Amyloid-like protein 1;  | 0.61                            | 0.07                  | 60.40                | -1.15 |
| AIMVKGVDEA | TIIDILTKR                | ANXA1_HUMAN |             |            | Annexin A1;              | -0.19                           | 0.01                  | 26.90                | 1.58  |
| DADELRAAMK | GLGTDEDTLIEILASR         | ANXA1_HUMAN |             |            | Annexin A1;              | -0.46                           | 0.07                  | 55.20                | 2.30  |
| AALHKAIMVK | GVDEATIIDILTKR           | ANXA1_HUMAN |             |            | Annexin A1;              | -0.65                           | 0.06                  | 43.90                | 3.59  |
| KLMVALAKGR | RAEDGSVIDYELIDQDAR       | ANXA2_HUMAN |             |            | Annexin A2;              | 2.58                            | 0.11                  | 44.50                | 1.29  |
| STVHEILCKL | SLEGDHSTPPSAYGSVKAYTNFDA | ANXA2_HUMAN | AXA2L_HUMAN |            | Annexin A2;              | -0.34                           | 0.02                  | 29.50                | 1.99  |



Table S6

| Non-prime  | Prime                     | Id 1        | Id 2        | Id 3 | Protein (Id1)                               | Fold-change (log <sub>2</sub> ) | Fc standard deviation | X! Tandem hyperscore | ppm   |
|------------|---------------------------|-------------|-------------|------|---------------------------------------------|---------------------------------|-----------------------|----------------------|-------|
| TPPSAYGSVK | AYTNFDAER                 | ANXA2_HUMAN | AXA2L_HUMAN |      | Annexin A2;                                 | -0.46                           | 0.05                  | 29.10                | 0.36  |
| DALNIETAIK | TKGVDEVTIVNILTNR          | ANXA2_HUMAN |             |      | Annexin A2;                                 | -0.46                           | 0.02                  | 39.40                | 1.41  |
| INRVYKEMYK | TDLEKDIISDTSGDFR          | ANXA2_HUMAN | AXA2L_HUMAN |      | Annexin A2;                                 | -0.52                           | 0.03                  | 54.20                | 3.29  |
| HEILCKLSLE | GDHSTPPSAYGSVKAYTNFDAER   | ANXA2_HUMAN | AXA2L_HUMAN |      | Annexin A2;                                 | -0.69                           | 0.07                  | 37.90                | 0.24  |
| HSTPPSAYGS | VKAYTNFDAER               | ANXA2_HUMAN | AXA2L_HUMAN |      | Annexin A2;                                 | -0.69                           | 0.06                  | 38.60                | -0.44 |
| DHSTPPSAYG | SVKAYTNFDAER              | ANXA2_HUMAN | AXA2L_HUMAN |      | Annexin A2;                                 | -1.14                           | 0.10                  | 33.40                | 0.48  |
| ILTNRSNAQR | QDIAFAYQR                 | ANXA2_HUMAN |             |      | Annexin A2;                                 | -1.59                           | 0.05                  | 29.50                | 3.95  |
| VHEILCKLSL | EGDHSTPPSAYGSVKAYTNFDAER  | ANXA2_HUMAN | AXA2L_HUMAN |      | Annexin A2;                                 | -1.80                           | 0.13                  | 48.40                | 2.92  |
| ILCKLSLEGD | HSTPPSAYGSVKAYTNFDAER     | ANXA2_HUMAN | AXA2L_HUMAN |      | Annexin A2;                                 | -2.05                           | 0.17                  | 55.10                | 4.35  |
| HTLIRVMVSR | SEIDLFNIR                 | ANXA5_HUMAN |             |      | Annexin A5;                                 | 2.05                            | 0.08                  | 48.40                | 4.49  |
| TLRKAMKGLG | TDEESILTLTSLR             | ANXA5_HUMAN |             |      | Annexin A5;                                 | 0.79                            | 0.04                  | 54.40                | 2.38  |
| DAYELKHALK | GAGTNEKVLTEIIASR          | ANXA5_HUMAN |             |      | Annexin A5;                                 | -1.72                           | 0.11                  | 33.50                | 4.74  |
| NRRLQTRKEK | AQALEELTGFR               | KI67_HUMAN  |             |      | Antigen KI-67;                              | 0.22                            | 0.01                  | 43.80                | -5.62 |
| SGLLVDVFS  | SASVVAPLAPGSEDNFAR        | AP2A2_HUMAN |             |      | AP-2 complex subunit alpha-2;               | -1.80                           | 0.19                  | 62.70                | 3.35  |
| LTRRSISQQK | SGVSITIDDPVR              | ACINU_HUMAN |             |      | Apoptotic chromatin condensation inducer in | 1.83                            | 0.09                  | 52.00                | 1.71  |
| KESLPSFK   | RKISVVSATKGV PAGNSDTEGGQP | ACINU_HUMAN |             |      | Apoptotic chromatin                         | 0.68                            | 0.04                  | 39.10                | 3.88  |
| KEKSEKKEK  | AQEPPAKLLDDLFR            | ACINU_HUMAN |             |      | Apoptotic chromatin condensation inducer in | 0.50                            | 0.05                  | 33.00                | 2.81  |
| KHHVEVGV   | FHIGSGCPDPQAYAQSIADAR     | ADC_HUMAN   |             |      | Arginine decarboxylase;                     | 6.02                            | 0.63                  | 31.30                | 3.18  |
| M          | VLAELYVSDR                | SYNC_HUMAN  |             |      | Asparagine--tRNA ligase,                    | -0.58                           | 0.05                  | 39.10                | 1.67  |
| IGSARGQSTG | KGPPQSPVFEGVYNNR          | ATX2L_HUMAN |             |      | Ataxin-2-like protein;                      | 0.57                            | 0.02                  | 53.80                | 2.62  |
| KPQYVDQIPK | AAKGTVGSILDR              | ABCE1_HUMAN |             |      | ATP-binding cassette sub-                   | 6.38                            | 0.22                  | 45.90                | 1.75  |

Table S6

| Non-prime   | Prime                    | Id 1        | Id 2 | Id 3 | Protein (Id1)                               | Fold-change (log <sub>2</sub> ) | Fc standard deviation | X! Tandem hyperscore | ppm  |
|-------------|--------------------------|-------------|------|------|---------------------------------------------|---------------------------------|-----------------------|----------------------|------|
| ALGEAINEYK  | GAVIVVSHDAR              | ABCF1_HUMAN |      |      | ATP-binding cassette sub-family F member 1; | 0.75                            | 0.06                  | 53.10                | 2.51 |
| EEKELMERLK  | KLSVPTSDEEDEVPAPKPR      | ABCF1_HUMAN |      |      | ATP-binding cassette sub-family F member 1; | 0.67                            | 0.05                  | 32.70                | 1.55 |
| LGGIGQFLAK  | AIEPPLDAVIEAEHTLR        | DHX9_HUMAN  |      |      | ATP-dependent RNA helicase A;               | 1.04                            | 0.03                  | 67.00                | 2.25 |
| VRFLVLDEAD  | GLLSQGYSDFINR            | DDX1_HUMAN  |      |      | ATP-dependent RNA                           | -1.87                           | 0.14                  | 63.60                | 2.26 |
| LLLLPCEAEA  | AAAAAAVSGSAAAEAKECDRPCV  | ATRN_HUMAN  |      |      | Attractin;                                  | 0.63                            | 0.06                  | 55.00                | 0.82 |
| PCEAEAAAAA  | AAVSGSAAAEAKECDRPCVNGGR  | ATRN_HUMAN  |      |      | Attractin;                                  | 0.42                            | 0.05                  | 23.40                | 2.05 |
| YSGRTQAQTR  | QASTLIDRPAPHFER          | E41L2_HUMAN |      |      | Band 4.1-like protein 2;                    | 2.38                            | 0.16                  | 41.10                | 0.79 |
| ITPLSLQTQG  | SSHETLNIVEEKKR           | E41L2_HUMAN |      |      | Band 4.1-like protein 2;                    | 0.98                            | 0.07                  | 37.20                | 1.48 |
| RHQVHGSRLR  | LLQVTPADSGEYVCR          | PGBM_HUMAN  |      |      | Basement membrane-specific heparan sulfate  | 4.54                            | 0.54                  | 60.20                | 0.92 |
| EETEDYRQFR  | KSVLADQGKSFATASHR        | BCLF1_HUMAN |      |      | Bcl-2-associated transcription factor 1;    | 1.09                            | 0.09                  | 43.20                | 2.52 |
| ACLALAAALA  | ALLLLPLPLPR              | RFNG_HUMAN  |      |      | Beta-1,3-N-                                 | 1.42                            | 0.23                  | 35.90                | 3.45 |
| AGRDL SRLPQ | LVGVSTPLQGGNSAAAIGQSSGEI | B4GT1_HUMAN |      |      | Beta-1,4-galactosyltransferase 1;           | -0.07                           | 0.01                  | 72.30                | 2.13 |
| LVGSQLAVMM  | YLSLGGFR                 | B4GT3_HUMAN |      |      | Beta-1,4-galactosyltransferase 3;           | 1.22                            | 0.13                  | 23.40                | 1.91 |
| LLVGSQAVM   | MYLSLGGFR                | B4GT3_HUMAN |      |      | Beta-1,4-galactosyltransferase 3;           | 0.81                            | 0.03                  | 26.50                | 1.21 |
| PTEKDEYACR  | VNHVTL SQPK              | B2MG_HUMAN  |      |      | Beta-2-microglobulin;                       | 3.54                            | 0.30                  | 28.60                | 2.03 |
| KDWSFYLLYY  | TEFTPTEKDEYACR           | B2MG_HUMAN  |      |      | Beta-2-microglobulin;                       | 1.12                            | 0.10                  | 35.50                | 0.94 |
| SNFLNCYVSG  | FHPSDIEVDLLKNGER         | B2MG_HUMAN  |      |      | Beta-2-microglobulin;                       | 1.01                            | 0.04                  | 42.50                | 3.09 |
| ALLSLSGLEA  | IQRTPKIQVYSR             | B2MG_HUMAN  |      |      | Beta-2-microglobulin;                       | 0.97                            | 0.05                  | 26.60                | 2.39 |
| ENGKSNFLNC  | YVSGFHPSDIEVDLLKNGER     | B2MG_HUMAN  |      |      | Beta-2-microglobulin;                       | 0.37                            | 0.01                  | 36.50                | 1.49 |

Table S6

| Non-prime   | Prime                 | Id 1        | Id 2 | Id 3 | Protein (Id1)                               | Fold-change (log <sub>2</sub> ) | Fc standard deviation | X! Tandem hyperscore | ppm   |
|-------------|-----------------------|-------------|------|------|---------------------------------------------|---------------------------------|-----------------------|----------------------|-------|
| GPLLWGCALG  | LQGGMLYPQESPSR        | BGLR_HUMAN  |      |      | Beta-glucuronidase;                         | 2.53                            | 0.21                  | 51.50                | 5.82  |
| AAAFAGRATA  | LWPWPQNFQTSQDR        | HEXA_HUMAN  |      |      | Beta-hexosaminidase subunit alpha;          | 1.36                            | 0.01                  | 61.70                | 2.78  |
| LALCGAGTTA  | AELSYSLR              | MANBA_HUMAN |      |      | Beta-mannosidase;                           | 1.03                            | 0.09                  | 23.90                | 1.86  |
| IPEDNADMAR  | LDFNLIR               | PUR9_HUMAN  |      |      | Bifunctional purine biosynthesis protein    | 4.95                            | 0.57                  | 30.20                | -0.87 |
| KSLFSNVVTK  | NKDLPEALR             | PUR9_HUMAN  |      |      | Bifunctional purine biosynthesis protein    | 0.37                            | 0.01                  | 34.20                | 5.66  |
| CWVLVGYAKG  | GLGDNHVHSSFIYR        | BMP5_HUMAN  |      |      | PURH;                                       | 1.70                            | 0.15                  | 32.00                | 3.68  |
| SYSNTLPVRK  | SVTPKNSYATTENKTLPR    | BAIP2_HUMAN |      |      | Bone morphogenetic                          | 0.56                            | 0.06                  | 34.10                | 1.75  |
| ASRSKRRAVE  | SGVPQPPDPPVQR         | BCCIP_HUMAN |      |      | Brain-specific                              | 0.31                            | 0.01                  | 31.70                | 1.92  |
| EDEEWPTLEK  | AATMTAAGHHAEEVVDPEDER | BYST_HUMAN  |      |      | BRCA2 and CDKN1A-interacting protein;       | 0.93                            | 0.08                  | 32.50                | 5.63  |
| MIQYNNLNLK  | TPVPSDIDISR           | C1TC_HUMAN  |      |      | Bystin;                                     | 0.53                            | 0.05                  | 36.00                | 1.38  |
| MAP         | AEILNGKEISAQIR        | C1TC_HUMAN  |      |      | C-1-tetrahydrofolate synthase, cytoplasmic; | 0.37                            | 0.03                  | 24.20                | 2.06  |
| LVYLTQPGNG  | NEGSVTGSCYCGKR        | CXL16_HUMAN |      |      | C-1-tetrahydrofolate synthase, cytoplasmic; | 0.28                            | 0.02                  | 22.80                | 1.34  |
| LTPPGPLASA  | GPVSAVLTELK           | CXCL6_HUMAN |      |      | C-X-C motif chemokine 6;                    | 0.94                            | 0.02                  | 55.90                | 1.10  |
| PPGPLASAGP  | VSAVLTELK             | CXCL6_HUMAN |      |      | C-X-C motif chemokine                       | 0.53                            | 0.05                  | 28.60                | 5.71  |
| RAPALSRVRR  | AWVIPPISVSENHKKR      | CAD15_HUMAN |      |      | Cadherin-15;                                | 2.31                            | 0.13                  | 28.80                | 4.63  |
| FSLFDKDG DG | TITTKELGTVMR          | CALM_HUMAN  |      |      | Calmodulin;                                 | 0.53                            | 0.04                  | 32.40                | 3.20  |
| AFRVFDKDG N | GYISAAELR             | CALM_HUMAN  |      |      | Calmodulin;                                 | 0.24                            | 0.02                  | 41.00                | 1.68  |
| AMRILGGVIS  | AISEAAAQYNPEPPPPR     | CPNS1_HUMAN |      |      | Calpain small subunit 1;                    | 0.43                            | 0.01                  | 43.80                | 2.87  |
| AAEGLGSHDR  | AIKYLNQDYEARL         | CAN2_HUMAN  |      |      | Calpain-2 catalytic subunit;                | 1.00                            | 0.05                  | 29.10                | -1.98 |
| SSKTRGIEWK  | RPTEICADPQFIIGGATR    | CAN2_HUMAN  |      |      | Calpain-2 catalytic subunit;                | 0.81                            | 0.03                  | 52.30                | 3.97  |

Table S6

| Non-prime  | Prime                     | Id 1        | Id 2 | Id 3 | Protein (Id1)                                    | Fold-change (log <sub>2</sub> ) | Fc standard deviation | X! Tandem hyperscore | ppm   |
|------------|---------------------------|-------------|------|------|--------------------------------------------------|---------------------------------|-----------------------|----------------------|-------|
| FDQTTISLQM | GTNKGASQAGMLAPGTR         | CNN3_HUMAN  |      |      | Calponin-3;                                      | 0.90                            | 0.08                  | 38.40                | 3.28  |
| LLGLLGLAVA | EPAVYFKEQFLDGDGWTSR       | CALR_HUMAN  |      |      | Calreticulin;                                    | 0.81                            | 0.01                  | 28.40                | 2.26  |
| GDLHMTQFFR | GNLAGLTR                  | CSTN1_HUMAN |      |      | Calsyntenin-1;                                   | 1.64                            | 0.07                  | 33.60                | 2.23  |
| YHGIVTENDN | TVLLDPPLIALDKDAPLR        | CSTN1_HUMAN |      |      | Calsyntenin-1;                                   | 1.42                            | 0.13                  | 33.30                | 4.73  |
| FARAASEFES | SEGVFLFPELR               | CSTN1_HUMAN |      |      | Calsyntenin-1;                                   | 1.29                            | 0.15                  | 33.10                | -1.21 |
| MTFTGVDTMA | SYEEVLHLLR                | CSTN1_HUMAN |      |      | Calsyntenin-1;                                   | 1.29                            | 0.11                  | 32.50                | -0.23 |
| APVFKEKSYK | ATVIEGKQYDSILR            | CSTN1_HUMAN |      |      | Calsyntenin-1;                                   | 0.85                            | 0.08                  | 26.20                | 5.17  |
| NPVVKGRRRR | GAISAEVYTEEDAASYVR        | KAP0_HUMAN  |      |      | cAMP-dependent protein                           | 0.30                            | 0.02                  | 72.00                | 3.31  |
| ALLLAQTFL  | LFLVSRPGPSSPAGGEAR        | CHST6_HUMAN |      |      | Carbohydrate sulfotransferase 6;                 | 0.64                            | 0.05                  | 20.90                | 1.97  |
| ALAAALVVHC | YSKSPSNKDAALLEAAR         | CLPB_HUMAN  |      |      | Caseinolytic peptidase B protein homolog;        | -0.58                           | 0.04                  | 35.90                | 3.74  |
| CLLVLANARS | RPSFHPLSDELVNYVNKR        | CATB_HUMAN  |      |      | Cathepsin B;                                     | 0.68                            | 0.01                  | 38.70                | 4.48  |
| GGPKPPQRVM | FTEDLKLPAFDAR             | CATB_HUMAN  |      |      | Cathepsin B;                                     | 0.15                            | 0.01                  | 33.20                | 4.35  |
| KPPQRVMFTE | DLKLPAFDAR                | CATB_HUMAN  |      |      | Cathepsin B;                                     | -1.40                           | 0.11                  | 36.00                | 1.69  |
| ADLPKSWDWR | NVDGVNYASITR              | CATZ_HUMAN  |      |      | Cathepsin Z;                                     | 3.37                            | 0.22                  | 41.40                | 4.04  |
| TATACPMKSN | EHDDCQVTNPSTGHFLFDLSSLSGR | MPRI_HUMAN  |      |      | Cation-independent mannose-6-phosphate receptor; | 1.42                            | 0.11                  | 33.90                | 2.74  |
| AERFMEENEG | HIVDIHDFSLGSSPHVR         | CD109_HUMAN |      |      | CD109 antigen;                                   | 2.38                            | 0.12                  | 66.30                | 3.34  |
| YAERFMEENE | GHIVDIHDFSLGSSPHVR        | CD109_HUMAN |      |      | CD109 antigen;                                   | 1.22                            | 0.09                  | 65.20                | 1.80  |

Table S6

| Non-prime   | Prime                | Id 1        | Id 2 | Id 3 | Protein (Id1)                          | Fold-change (log <sub>2</sub> ) | Fc standard deviation | X! Tandem hyperscore | ppm   |
|-------------|----------------------|-------------|------|------|----------------------------------------|---------------------------------|-----------------------|----------------------|-------|
| FMEENEGHIV  | DIHDFSLGSSPHVR       | CD109_HUMAN |      |      | CD109 antigen;                         | 1.00                            | 0.08                  | 39.80                | 2.50  |
| EYAERFMEEN  | EGHIVDIHDFSLGSSPHVR  | CD109_HUMAN |      |      | CD109 antigen;                         | 0.87                            | 0.04                  | 37.20                | 0.98  |
| SSPGPVEILT  | TVTESVTGISR          | CD109_HUMAN |      |      | CD109 antigen;                         | 0.15                            | 0.01                  | 31.80                | 0.68  |
| ERFMEENEGH  | IVDIHDFSLGSSPHVR     | CD109_HUMAN |      |      | CD109 antigen;                         | -0.43                           | 0.03                  | 48.00                | 2.97  |
| SLNPSGEVTR  | QIGDALPVSCTISASR     | CD166_HUMAN |      |      | CD166 antigen;                         | 2.24                            | 0.24                  | 40.70                | 5.69  |
| GKWKEYECPDG | SPVFIAFR             | CD166_HUMAN |      |      | CD166 antigen;                         | 1.08                            | 0.07                  | 25.90                | -0.41 |
| SATVFRPGLG  | WYTVNSAYGDTIIIPCR    | CD166_HUMAN |      |      | CD166 antigen;                         | 0.98                            | 0.05                  | 80.20                | 4.17  |
| DSEQLPLRPK  | SVDFDSLTVR           | CD2AP_HUMAN |      |      | CD2-associated protein;                | 0.04                            | 0.00                  | 37.00                | 4.80  |
| EASKSQEMVH  | LVNKESSETPDQFMTAETR  | CD44_HUMAN  |      |      | CD44 antigen;                          | 1.29                            | 0.11                  | 44.40                | -3.65 |
| GLCLVPLSLA  | QIDLNITCR            | CD44_HUMAN  |      |      | CD44 antigen;                          | 0.04                            | 0.00                  | 33.90                | 0.60  |
|             | M VGGEEAAA VEELVSGVR | C2AIL_HUMAN |      |      | CDKN2AIP N-terminal-like protein;      | 0.26                            | 0.03                  | 32.80                | 3.21  |
| AVEELVSGVR  | QAADFAEQFR           | C2AIL_HUMAN |      |      | CDKN2AIP N-terminal-like protein;      | -0.29                           | 0.03                  | 27.00                | 0.00  |
| MHSLA       | TAAPVPTTLAQVDR       | RCD1_HUMAN  |      |      | Cell differentiation                   | -0.24                           | 0.02                  | 44.00                | 4.20  |
| TSDRGFQFVS  | SSLPDICYR            | CNBP_HUMAN  |      |      | Cellular nucleic acid-binding protein; | 0.11                            | 0.01                  | 40.40                | 3.58  |
| SDRGFQFVSS  | SSLPDICYR            | CNBP_HUMAN  |      |      | Cellular nucleic acid-binding protein; | -0.52                           | 0.03                  | 22.90                | 4.06  |

Table S6

| Non-prime  | Prime                 | Id 1        | Id 2 | Id 3 | Protein (Id1)                                | Fold-change (log <sub>2</sub> ) | Fc standard deviation | X! Tandem hyperscore | ppm  |
|------------|-----------------------|-------------|------|------|----------------------------------------------|---------------------------------|-----------------------|----------------------|------|
| LIPHINKQTS | STPSSLALTSASR         | CE170_HUMAN |      |      | Centrosomal protein of 170 kDa;              | 2.62                            | 0.23                  | 42.40                | 2.98 |
| IPEAFRGVHR | YLSNAYAR              | CLIC1_HUMAN |      |      | Chloride intracellular channel protein 1;    | 4.07                            | 0.37                  | 24.30                | 3.85 |
| EQPQVELFVK | AGSDGAKIGNCPFSQR      | CLIC1_HUMAN |      |      | Chloride intracellular channel protein 1;    | 1.53                            | 0.11                  | 23.30                | 0.23 |
| IVQVVCKKYR | GFTIPEAFR             | CLIC1_HUMAN |      |      | Chloride intracellular                       | 1.31                            | 0.03                  | 29.90                | 0.84 |
| LLLGSRPARG | AGPEPPVLPPIR          | CHRD_HUMAN  |      |      | Chordin;                                     | 0.33                            | 0.02                  | 37.30                | 2.71 |
| MGKKQNGKSK | KVEEAEPPEFVVEKVLDRR   | CBX3_HUMAN  |      |      | Chromobox protein                            | 0.20                            | 0.00                  | 34.00                | 2.20 |
| MGKKTTR    | TADSSSEDEEEYVVEKVLDRR | CBX5_HUMAN  |      |      | Chromobox protein homolog 5;                 | -2.46                           | 0.14                  | 51.10                | 2.64 |
| VVESMVTATE | VAPPPPPVEVPIR         | CHD4_HUMAN  |      |      | Chromodomain-helicase-DNA-binding protein 4; | -0.72                           | 0.06                  | 30.90                | 4.63 |
| PDLALRMAVR | NNLAGAEELFAR          | CLH1_HUMAN  |      |      | Clathrin heavy chain 1;                      | 2.22                            | 0.14                  | 59.50                | 2.25 |
| KDEEETVTTK | HIHITQATETTTTR        | EPN4_HUMAN  |      |      | Clathrin interactor 1;                       | 1.40                            | 0.13                  | 32.40                | 2.50 |
| RKQEAWEK   | AIKELEEWYAR           | CLCA_HUMAN  |      |      | Clathrin light chain A;                      | -0.09                           | 0.00                  | 44.10                | 0.14 |
| RLLRERAIFK | VHSDFATAATR           | K0664_HUMAN |      |      | Clustered mitochondria                       | 0.66                            | 0.06                  | 31.50                | 3.22 |
| LDVMQDHFSR | ASSIIDELFQDR          | CLUS_HUMAN  |      |      | Clusterin;                                   | 4.90                            | 0.67                  | 59.80                | 2.18 |
| DVMQDHFSRA | SSIIDELFQDR           | CLUS_HUMAN  |      |      | Clusterin;                                   | 0.80                            | 0.12                  | 48.00                | 1.40 |
| VTEVVVKLFD | SDPITVTPVEVSR         | CLUS_HUMAN  |      |      | Clusterin;                                   | 0.79                            | 0.07                  | 48.70                | 4.58 |
| AQQAMDIHFH | SPAQHPPTFEFIR         | CLUS_HUMAN  |      |      | Clusterin;                                   | 0.38                            | 0.04                  | 30.00                | 0.77 |
| IDSLENDRQ  | QTHMLDVMQDHFSR        | CLUS_HUMAN  |      |      | Clusterin;                                   | -3.05                           | 0.25                  | 24.70                | 2.13 |
|            | MVLLAAAVCTKAGKAIIVSR  | COPD_HUMAN  |      |      | Coatomer subunit delta;                      | 0.18                            | 0.01                  | 34.20                | 3.03 |
| LLLLPGPAGS | EGAAPAIATCFTR         | COCH_HUMAN  |      |      | Cochlin;                                     | 7.84                            | 0.81                  | 66.60                | 1.81 |
| LHARHKEQQR | QFGLTPPGSLR           | CC153_HUMAN |      |      | Coiled-coil domain-containing protein 153;   | 2.08                            | 0.08                  | 27.40                | 3.73 |

Table S6

| Non-prime  | Prime                        | Id 1        | Id 2        | Id 3 | Protein (Id1)                             | Fold-change (log <sub>2</sub> ) | Fc standard deviation | X! Tandem hyperscore | ppm   |
|------------|------------------------------|-------------|-------------|------|-------------------------------------------|---------------------------------|-----------------------|----------------------|-------|
| MRAAPRPAPV | AQPPAAAPPSAVGSSAAAPR         | CHCH2_HUMAN | CHCH9_HUMAN |      | Coiled-coil-helix-coiled-                 | -0.26                           | 0.02                  | 46.90                | 1.27  |
| PPASRAPQMR | AAPRPAPVAQPPAAAPPSAVGSSAAAPR | CHCH2_HUMAN | CHCH9_HUMAN |      | Coiled-coil-helix-coiled-                 | -0.40                           | 0.03                  | 48.60                | 1.60  |
| AITPDHLEPR | LSIIATDHTYR                  | CO6A1_HUMAN |             |      | coil-helix domain-Collagen alpha-1(VI)    | 5.73                            | 0.51                  | 38.70                | 3.03  |
| GRQVNEPHIR | VLVTGKTAEYDVAYGESHLFR        | CO6A1_HUMAN |             |      | Collagen alpha-1(VI) chain;               | 5.36                            | 0.31                  | 40.60                | 3.89  |
| GRTDPAHDVR | VAVVQYSGTGQQRPER             | CO6A1_HUMAN |             |      | Collagen alpha-1(VI) chain;               | 4.24                            | 0.54                  | 31.00                | 0.66  |
| RVPSYQALLR | GVFHQTVSR                    | CO6A1_HUMAN |             |      | Collagen alpha-1(VI) chain;               | 3.25                            | 0.28                  | 31.10                | 4.44  |
| QLLPPSPNNR | IALVITDGR                    | CO6A1_HUMAN |             |      | Collagen alpha-1(VI)                      | 1.89                            | 0.33                  | 35.80                | 0.41  |
| LVWNAGALHY | SDEVEIIQGLTR                 | CO6A1_HUMAN |             |      | Collagen alpha-1(VI)                      | 1.56                            | 0.10                  | 55.40                | 5.04  |
| ESGTRRGIPK | VIVVITDGR                    | COEA1_HUMAN |             |      | Collagen alpha-1(XIV) chain;              | 7.54                            | 1.08                  | 30.10                | 2.40  |
| LTESYCETWR | TEAPSATGQASSLLGGR            | COIA1_HUMAN |             |      | Collagen alpha-1(XVIII) chain;            | 5.43                            | 0.79                  | 82.80                | 4.23  |
| FAYGDHQSPN | TAITQMTFLR                   | CO5A2_HUMAN |             |      | Collagen alpha-2(V) chain;                | -1.40                           | 0.07                  | 37.40                | 3.30  |
| IGPKGDPGNR | GHPGPPGVLVTPPLPLK            | CO4A4_HUMAN |             |      | Collagen alpha-4(IV) chain;               | -2.24                           | 0.11                  | 22.50                | 4.41  |
| VRLHWPTSLP | SGDAFSSVGTHR                 | C43BP_HUMAN |             |      | Collagen type IV alpha-3-binding protein; | 0.45                            | 0.04                  | 26.70                | 0.72  |
| SEKVRLHWPT | SLPSGDAFSSVGTHR              | C43BP_HUMAN |             |      | Collagen type IV alpha-3-binding protein; | -1.59                           | 0.05                  | 36.80                | -0.13 |
| QVPDTESETR | ILLQGTPVAQMTEDAVER           | CO3_HUMAN   |             |      | Complement C3;                            | 8.04                            | 1.98                  | 112.10               | 2.29  |
| YTPGSTVLYR | IFTVNHKLLPVGR                | CO3_HUMAN   |             |      | Complement C3;                            | 5.03                            | 0.41                  | 36.30                | 1.35  |
| RISLPESLKR | IPIEDGSGEVVLSR               | CO3_HUMAN   |             |      | Complement C3;                            | 4.83                            | 0.32                  | 55.90                | 5.00  |
| PSRSSKITHR | IHWESASLLR                   | CO3_HUMAN   |             |      | Complement C3;                            | 4.02                            | 0.29                  | 29.90                | -1.05 |

Table S6

| Non-prime  | Prime                  | Id 1        | Id 2 | Id 3 | Protein (Id1)                                 | Fold-change (log <sub>2</sub> ) | Fc standard deviation | X! Tandem hyperscore | ppm   |
|------------|------------------------|-------------|------|------|-----------------------------------------------|---------------------------------|-----------------------|----------------------|-------|
| VVKSGQSEDR | QPVPGQQMTLKIEGDHGAR    | CO3_HUMAN   |      |      | Complement C3;                                | 3.93                            | 0.20                  | 35.20                | 0.94  |
| FDEYIMAIEQ | TIKSGSDEVQVGQQR        | CO3_HUMAN   |      |      | Complement C3;                                | 3.88                            | 0.45                  | 45.90                | 2.07  |
| ARASHLGLAR | SNLDEDIIAEENIVSR       | CO3_HUMAN   |      |      | Complement C3;                                | 3.23                            | 0.30                  | 62.30                | 5.90  |
| SDDKVTLEER | LDKACEPGVDYVYKTR       | CO3_HUMAN   |      |      | Complement C3;                                | 2.74                            | 0.18                  | 51.20                | -2.70 |
| KGYTQQLAFR | QPSSAFAAFVKR           | CO3_HUMAN   |      |      | Complement C3;                                | 2.61                            | 0.19                  | 20.00                | 0.73  |
| GDGVAKLSIN | THPSQKPLSITVR          | CO3_HUMAN   |      |      | Complement C3;                                | 1.73                            | 0.13                  | 29.80                | 2.89  |
| LLTHLPLALG | SPMYSIITPNILR          | CO3_HUMAN   |      |      | Complement C3;                                | 1.49                            | 0.10                  | 56.30                | 1.82  |
| QALPYSTVGN | SNNYLHLSVLR            | CO3_HUMAN   |      |      | Complement C3;                                | 1.38                            | 0.09                  | 39.80                | 0.59  |
| PCACGCGCGS | LHTDGDKAFVDFLSDEIKEER  | C1QBP_HUMAN |      |      | Complement component 1 Q subcomponent-binding | 0.26                            | 0.01                  | 47.20                | 3.58  |
| VLLCLPAVWG | DCGLPPDVPNAQPALEGR     | DAF_HUMAN   |      |      | Complement decay-                             | 0.99                            | 0.02                  | 81.40                | 4.44  |
| IVNHAGRRPD | SLQHVLLPVLDR           | CFAD_HUMAN  |      |      | Complement factor D;                          | 0.74                            | 0.04                  | 41.20                | -0.14 |
| EVLKRLRLQK | RGTGGVDTAAVGGVFDVSNADR | KCRB_HUMAN  |      |      | Creatine kinase B-type;                       | 5.36                            | 0.56                  | 75.20                | 4.65  |
| GDEESYEVFK | DLFDPIIEDR             | KCRB_HUMAN  |      |      | Creatine kinase B-type;                       | 5.03                            | 0.45                  | 41.10                | 9.19  |
| LSAHNNHMAK | VLTPELYAELR            | KCRB_HUMAN  |      |      | Creatine kinase B-type;                       | 2.75                            | 0.23                  | 33.60                | 4.50  |
| LQKRGTGGVD | TAAVGGVFDVSNADR        | KCRB_HUMAN  |      |      | Creatine kinase B-type;                       | 1.45                            | 0.19                  | 49.50                | -0.73 |
| IQKRVPcAYD | KTALALEVGDIVKVTR       | CRKL_HUMAN  |      |      | Crk-like protein;                             | 4.60                            | 0.27                  | 26.10                | 1.72  |
| AARLPRGAEA | FEIALPR                | CDCP1_HUMAN |      |      | CUB domain-containing protein 1;              | 5.79                            | 0.49                  | 23.30                | -0.57 |
| PHSAADDDTS | SELQRLADVDPQQGR        | CNGA2_HUMAN |      |      | Cyclic nucleotide-gated                       | 2.77                            | 0.29                  | 47.50                | 9.76  |
| IRHRPKAHYM | KKQPDITEGMR            | CCNA1_HUMAN |      |      | Cyclin-A1;                                    | 7.47                            | 1.03                  | 32.90                | 1.23  |



Table S6

| Non-prime  | Prime                    | Id 1        | Id 2 | Id 3 | Protein (Id1)                                                    | Fold-change (log <sub>2</sub> ) | Fc standard deviation | X! Tandem hyperscore | ppm   |
|------------|--------------------------|-------------|------|------|------------------------------------------------------------------|---------------------------------|-----------------------|----------------------|-------|
| MMC        | GAPSATQPATAETQHIADQVR    | CYTB_HUMAN  |      |      | Cystatin-B;                                                      | -0.52                           | 0.05                  | 42.50                | 1.83  |
| MMCG       | APSATQPATAETQHIADQVR     | CYTB_HUMAN  |      |      | Cystatin-B;                                                      | -0.69                           | 0.07                  | 32.30                | 3.48  |
| MM         | CGAPSATQPATAETQHIADQVR   | CYTB_HUMAN  |      |      | Cystatin-B;                                                      | -0.72                           | 0.07                  | 86.60                | 2.60  |
| AGSSPGKPPR | LVGGPMDASVEEEGVRR        | CYTC_HUMAN  |      |      | Cystatin-C;                                                      | 4.97                            | 0.60                  | 84.30                | -1.08 |
| AGSSPGKPPR | LVGGPMDASVEEEGVRR        | CYTC_HUMAN  |      |      | Cystatin-C;                                                      | 2.30                            | 0.14                  | 27.90                | 0.60  |
| ASVEEEGVRR | ALDFAVGEYNKASNDMYHSR     | CYTC_HUMAN  |      |      | Cystatin-C;                                                      | 1.56                            | 0.07                  | 43.30                | 2.73  |
| LLLARGTRA  | LVCLPCDESKCEEPR          | CRIM1_HUMAN |      |      | Cysteine-rich motor neuron 1 protein;                            | 0.67                            | 0.03                  | 38.30                | 1.68  |
| GSYIYEKPLA | EGPQVTGPIEVPAAR          | CRIP2_HUMAN |      |      | Cysteine-rich protein 2;                                         | 0.72                            | 0.07                  | 69.20                | 5.59  |
| MATAEASGSD | GKGQEVETSVTYYR           | CYB5B_HUMAN |      |      | Cytochrome b5 type B;                                            | -0.24                           | 0.02                  | 45.70                | 1.96  |
| HTVEKGGKHK | TGPNLHGLFGR              | CYC_HUMAN   |      |      | Cytochrome c;                                                    | -0.37                           | 0.01                  | 30.00                | 1.66  |
| MKLSPYYKVF | EEDALSWEDKLNK            | DYHC1_HUMAN |      |      | Cytoplasmic dynein 1 heavy chain 1;                              | 6.49                            | 1.24                  | 32.30                | 2.76  |
| VPQIEVETHK | VAAPDVVVPTLDTVR          | DYHC1_HUMAN |      |      | Cytoplasmic dynein 1 heavy chain 1;                              | 0.71                            | 0.05                  | 50.20                | 0.57  |
| HYDFGLRALK | SVLVSAGNVKR              | DYHC1_HUMAN |      |      | Cytoplasmic dynein 1                                             | 0.60                            | 0.06                  | 36.00                | 2.69  |
| TEEEKQILH  | SEEFLSFFDHSTR            | DC112_HUMAN |      |      | Cytoplasmic dynein 1                                             | 0.02                            | 0.00                  | 32.30                | 0.61  |
| HYLAGRRAMK | TVFGVEPDLTR              | CNDP2_HUMAN |      |      | Cytosolic non-specific dipeptidase;                              | 4.32                            | 0.17                  | 40.20                | 4.41  |
| KGVRVNCAR  | GGIVDEGALLR              | SERA_HUMAN  |      |      | D-3-phosphoglycerate dehydrogenase;                              | 2.16                            | 0.09                  | 47.80                | 1.06  |
| WKLDVATDNF | FQNPelyir                | DCNL1_HUMAN |      |      | DCN1-like protein 1;                                             | 0.53                            | 0.02                  | 33.20                | 1.40  |
| PSVIRHVRSW | SNIPFITVPLSR             | P5CS_HUMAN  |      |      | Delta-1-pyrroline-5-Delta(3,5)-Delta(2,4)-dienoyl-CoA isomerase, | -0.09                           | 0.00                  | 51.30                | 4.37  |
| YPGLSISLRL | TGSSAQEEASGVALGEAPDHSYES | ECH1_HUMAN  |      |      |                                                                  | -1.04                           | 0.09                  | 82.70                | 3.84  |
| EREAPAGALA | AVLKHSSSTLPPESTQVR       | DHYS_HUMAN  |      |      | Deoxyhypusine synthase;                                          | -0.21                           | 0.01                  | 33.40                | 3.02  |

Table S6

| Non-prime  | Prime                    | Id 1        | Id 2       | Id 3 | Protein (Id1)                | Fold-change (log <sub>2</sub> ) | Fc standard deviation | X! Tandem hyperscore | ppm   |
|------------|--------------------------|-------------|------------|------|------------------------------|---------------------------------|-----------------------|----------------------|-------|
| ALRGSGEAAQ | RGLQYKYLDESSGGWR         | DNS2A_HUMAN |            |      | Deoxyribonuclease-2-alpha;   | -0.65                           | 0.07                  | 40.20                | 2.42  |
| EKFQVKKGDR | IAQLICER                 | DUT_HUMAN   |            |      | Deoxyuridine 5'-             | 3.50                            | 0.26                  | 30.70                | 0.10  |
| ETPAISPSKR | ARPAEVGGMQLR             | DUT_HUMAN   |            |      | Deoxyuridine 5'-triphosphate | -0.04                           | 0.00                  | 57.60                | -0.15 |
| PKHPLVLRQK | RAWITAPVALR              | DSG2_HUMAN  |            |      | Desmoglein-2;                | 3.86                            | 0.40                  | 33.90                | 1.40  |
| KHPLVLRQKR | AWITAPVALR               | DSG2_HUMAN  |            |      | Desmoglein-2;                | 0.57                            | 0.02                  | 33.90                | 2.38  |
| CRKRRKRCMR | HAMCCPGNYCKNGICVSSDQNHFR | DKK1_HUMAN  |            |      | Dickkopf-related protein 1;  | 4.77                            | 0.92                  | 32.30                | -8.18 |
| TDEYCASPTR | GGDAGVQICLACR            | DKK1_HUMAN  |            |      | Dickkopf-related protein 1;  | 2.15                            | 0.18                  | 67.90                | 3.90  |
| EVCTKQRKKG | SHGLEIFQR                | DKK1_HUMAN  | DKK2_HUMAN |      | Dickkopf-related protein 1;  | 2.09                            | 0.12                  | 35.60                | 1.97  |
| MCCPGNYCKN | GICVSSDQNHFR             | DKK1_HUMAN  |            |      | Dickkopf-related protein 1;  | 2.00                            | 0.17                  | 31.20                | 1.72  |
| RGEIEETITE | SFGNDHSTLDGYSR           | DKK1_HUMAN  |            |      | Dickkopf-related protein 1;  | 1.94                            | 0.14                  | 25.70                | 0.82  |
| LDGYSRRTTL | SSKMYHTKGQEGSVCLR        | DKK1_HUMAN  |            |      | Dickkopf-related protein 1;  | 1.76                            | 0.06                  | 36.50                | 1.80  |
| NHFRGEIEET | ITESFGNDHSTLDGYSR        | DKK1_HUMAN  |            |      | Dickkopf-related protein 1;  | 1.33                            | 0.12                  | 34.90                | 0.93  |
| CVSSDQNHFR | GEIEETITESFGNDHSTLDGYSR  | DKK1_HUMAN  |            |      | Dickkopf-related protein 1;  | 1.22                            | 0.08                  | 48.30                | 2.32  |
| YSRRTTLSSK | MYHTKGQEGSVCLR           | DKK1_HUMAN  |            |      | Dickkopf-related protein 1;  | 0.75                            | 0.05                  | 29.50                | 1.55  |
| GEVCTKQRKK | GSHGLEIFQR               | DKK1_HUMAN  | DKK2_HUMAN |      | Dickkopf-related protein 1;  | 0.53                            | 0.03                  | 38.40                | 5.85  |
| QNHFRGEIEE | TITESFGNDHSTLDGYSR       | DKK1_HUMAN  |            |      | Dickkopf-related protein 1;  | 0.42                            | 0.03                  | 32.30                | 2.41  |
| RFRTTAVCK  | DDLVTVKTPAFAESVTEGDVR    | ODO2_HUMAN  |            |      | Dihydrolipoyllysine-residue  | 0.78                            | 0.02                  | 78.50                | 3.81  |

Table S6

| Non-prime   | Prime                   | Id 1        | Id 2 | Id 3 | Protein (Id1)                             | Fold-change (log <sub>2</sub> ) | Fc standard deviation | X! Tandem hyperscore | ppm  |
|-------------|-------------------------|-------------|------|------|-------------------------------------------|---------------------------------|-----------------------|----------------------|------|
| MAP         | VLSKDSADIESILALNPR      | DPYD_HUMAN  |      |      | Dihydropyrimidine dehydrogenase           | 0.60                            | 0.03                  | 50.10                | 2.93 |
| M           | APVLSKDSADIESILALNPR    | DPYD_HUMAN  |      |      | [NADP(+);                                 | 0.26                            | 0.01                  | 56.90                | 4.86 |
| KVTTYCNETM  | TGWVHDLVGR              | CATC_HUMAN  |      |      | Dipeptidyl peptidase 1;                   | 2.14                            | 0.16                  | 37.20                | 1.20 |
| APLTAEIQQK  | ILHLPTSWDWR             | CATC_HUMAN  |      |      | Dipeptidyl peptidase 1;                   | 0.37                            | 0.00                  | 41.00                | 2.74 |
| GSEHCYDIYR  | LYHSCADPTGCGTGP DAR     | DPP2_HUMAN  |      |      | Dipeptidyl peptidase 2;                   | 1.82                            | 0.17                  | 41.50                | 2.29 |
| QDAPAIAFGG  | SYGGMLSAYLR             | DPP2_HUMAN  |      |      | Dipeptidyl peptidase 2;                   | 1.34                            | 0.05                  | 37.60                | 6.34 |
| LWALGLLGAG  | SPLPSWLPNIGGTEEQAESEKAF | ADA15_HUMAN |      |      | Disintegrin and                           | 1.76                            | 0.03                  | 56.50                | 6.33 |
| QDDLPI SLKK | VLQTS LPEPLR            | ADA15_HUMAN |      |      | Disintegrin and                           | 1.46                            | 0.13                  | 38.10                | 4.29 |
| VLGTCP PARC | GQAGDASLMELEKR          | ADA22_HUMAN |      |      | Disintegrin and                           | -1.24                           | 0.23                  | 40.40                | 1.46 |
| PRPYSKQVSY  | VIQAEGKEHIIHLER         | ADAM9_HUMAN |      |      | Disintegrin and metalloproteinase domain- | 1.32                            | 0.08                  | 34.90                | 0.11 |
| LESFNYVLSK  | STKADIGPNLDQLKDDEILR    | ERC6L_HUMAN |      |      | DNA excision repair protein ERCC-6-like;  | 1.10                            | 0.08                  | 43.10                | 4.12 |
| AHNLCYT TLL | RPGTAQKLG LTEDQFIR      | DPOD1_HUMAN |      |      | DNA polymerase delta catalytic subunit;   | 0.15                            | 0.01                  | 31.10                | 4.83 |
| MEQQSISISK  | AGIVTSLQAR              | MCM2_HUMAN  |      |      | DNA replication licensing factor MCM2;    | 0.66                            | 0.08                  | 36.60                | 2.19 |
| EEDQGIYQSK  | VRELISDNQYR             | MCM3_HUMAN  |      |      | DNA replication licensing                 | 1.09                            | 0.10                  | 42.40                | 1.61 |
| LLGDKGQTAR  | TQRPADVIFATVR           | MCM7_HUMAN  |      |      | DNA replication licensing                 | 1.03                            | 0.03                  | 34.40                | 4.44 |
| TSRSKEEFTK  | LAASFQLR                | RFX8_HUMAN  |      |      | DNA-binding protein                       | 2.09                            | 0.15                  | 21.40                | 0.86 |
| ARWPVAGQIR  | ATQQQHDFTLTQTADGR       | PRKDC_HUMAN |      |      | DNA-dependent protein                     | 2.32                            | 0.25                  | 45.10                | 2.31 |
| AASQAVEEMR  | SRVVLGEFGVR             | RPAC1_HUMAN |      |      | DNA-directed RNA                          | 0.11                            | 0.01                  | 45.60                | 1.20 |
| M           | GKDYYQTLGLAR            | DNJB1_HUMAN |      |      | DnaJ homolog subfamily B member 1;        | -0.14                           | 0.01                  | 46.50                | 1.10 |
| M           | VDYEEVLGVQR             | DNJB6_HUMAN |      |      | DnaJ homolog subfamily B member 6;        | -0.92                           | 0.04                  | 50.50                | 2.98 |
| IVYMAILVGT  | DQDFYSLLGVSKTASSR       | DJC10_HUMAN |      |      | DnaJ homolog subfamily C member 10;       | 0.70                            | 0.03                  | 34.70                | 4.24 |

Table S6

| Non-prime   | Prime                 | Id 1        | Id 2        | Id 3        | Protein (Id1)                                                | Fold-change (log <sub>2</sub> ) | Fc standard deviation | X! Tandem hyperscore | ppm   |
|-------------|-----------------------|-------------|-------------|-------------|--------------------------------------------------------------|---------------------------------|-----------------------|----------------------|-------|
| QQRQLGQR    | QPPPSEPTQGPEIVPR      | DNJC4_HUMAN |             |             | DnaJ homolog subfamily                                       | -4.47                           | 0.00                  | 32.40                | -1.30 |
| DRQSARKPLL  | GLPSYMLQSEELR         | DNMBP_HUMAN |             |             | Dynamin-binding protein;                                     | -2.46                           | 0.14                  | 63.70                | 2.45  |
| LLLSVVMAQS  | HWPSEPSEAVR           | DAG1_HUMAN  |             |             | Dystroglycan;                                                | 1.31                            | 0.03                  | 38.30                | 2.56  |
| SLPDIPPIQL  | EDAGSSSLDNLLSR        | TRI33_HUMAN |             |             | E3 ubiquitin-protein                                         | 1.66                            | 0.13                  | 32.10                | 0.60  |
| DCELSAKLLR  | RADLNQIGIGEPQSPSR     | EFHD2_HUMAN |             |             | EF-hand domain-containing protein D2;                        | 1.01                            | 0.08                  | 71.20                | 2.90  |
| LIAGTLVLEA  | AVTGVVPVKQDTVKGR      | ELAF_HUMAN  |             |             | Elafin;                                                      | 3.45                            | 0.34                  | 34.20                | 2.30  |
| IKVSYARPSS  | EVIKDANLYISGLPR       | ELAV1_HUMAN |             |             | ELAV-like protein 1;                                         | 0.06                            | 0.00                  | 42.40                | 2.41  |
| TIKVSYPARPS | SEVIKIDANLYISGLPR     | ELAV1_HUMAN |             |             | ELAV-like protein 1;                                         | -0.92                           | 0.07                  | 31.60                | 3.69  |
| LQSKTIKVSY  | ARPSSEVIKIDANLYISGLPR | ELAV1_HUMAN |             |             | ELAV-like protein 1;                                         | -1.09                           | 0.05                  | 45.70                | 2.45  |
| SEWLDQKLTK  | SDRPELTGAKVVVSGGR     | ETFA_HUMAN  |             |             | Electron transfer flavoprotein subunit alpha, mitochondrial; | 0.24                            | 0.02                  | 35.30                | 2.22  |
| LGRFAVRDMR  | QTVAVGVKAVDK          | EF1A1_HUMAN | EF1A3_HUMAN |             | Elongation factor 1-alpha 1;                                 | 1.59                            | 0.14                  | 23.50                | 1.63  |
| RPTDKPLRLP  | LQDVYKIGGIGTVPVGR     | EF1A1_HUMAN | EF1A2_HUMAN | EF1A3_HUMAN | Elongation factor 1-alpha 1;                                 | 1.09                            | 0.04                  | 28.40                | 1.47  |
| LGRFAVRDMR  | QTVAVGVKAVDKK         | EF1A1_HUMAN | EF1A3_HUMAN |             | Elongation factor 1-alpha 1;                                 | 0.99                            | 0.07                  | 31.30                | 1.15  |
| MVPGKPMCVE  | SFSDYPLGR             | EF1A1_HUMAN | EF1A3_HUMAN |             | Elongation factor 1-alpha 1;                                 | 0.76                            | 0.02                  | 24.40                | 3.66  |
| TDKPLRLPLQ  | DVYKIGGIGTVPVGR       | EF1A1_HUMAN | EF1A2_HUMAN | EF1A3_HUMAN | Elongation factor 1-alpha 1;                                 | 0.37                            | 0.03                  | 38.90                | 3.02  |
| LRLPLQDVYK  | IGGIGTVPVGR           | EF1A1_HUMAN | EF1A2_HUMAN | EF1A3_HUMAN | Elongation factor 1-alpha 1;                                 | 0.30                            | 0.00                  | 40.70                | 1.13  |
| STPEPPYSQKR | YEEIVKEVSTYIKK        | EF1A1_HUMAN | EF1A3_HUMAN |             | Elongation factor 1-alpha 1;                                 | 0.02                            | 0.00                  | 29.00                | 3.36  |
| RLPLQDVYKI  | GGIGTVPVGR            | EF1A1_HUMAN | EF1A2_HUMAN | EF1A3_HUMAN | Elongation factor 1-alpha 1;                                 | -0.09                           | 0.01                  | 43.70                | 1.17  |

Table S6

| Non-prime  | Prime                     | Id 1        | Id 2        | Id 3        | Protein (Id1)                | Fold-change (log <sub>2</sub> ) | Fc standard deviation | X! Tandem hyperscore | ppm  |
|------------|---------------------------|-------------|-------------|-------------|------------------------------|---------------------------------|-----------------------|----------------------|------|
| KLEDGPKFLK | SGDAAIVDMVPGKPMCVESFSDYI  | EF1A1_HUMAN | EF1A3_HUMAN |             | Elongation factor 1-alpha 1; | -0.21                           | 0.00                  | 85.50                | 3.96 |
| DKPLRLPLQD | VYKIGGIGTVPVGR            | EF1A1_HUMAN | EF1A2_HUMAN | EF1A3_HUMAN | Elongation factor 1-alpha    | -0.62                           | 0.04                  | 40.40                | 1.56 |
| ISLWKFETSK | YYVTIIDAPGHR              | EF1A1_HUMAN | EF1A3_HUMAN |             | Elongation factor 1-alpha 1; | -1.09                           | 0.07                  | 39.00                | 3.40 |
| SGDHGELVVR | IASLEVENQSLR              | EF1D_HUMAN  |             |             | Elongation factor 1-delta;   | 1.36                            | 0.08                  | 50.50                | 2.02 |
| VLEKSSPGHR | ATAPQTQHVSPMR             | EF1D_HUMAN  |             |             | Elongation factor 1-delta;   | 0.31                            | 0.02                  | 42.10                | 1.85 |
| IARARENIQK | SLAGSSGPGASSGTSGDHGELVVR  | EF1D_HUMAN  |             |             | Elongation factor 1-delta;   | -0.14                           | 0.01                  | 78.70                | 3.42 |
| LRDIARAREN | IQKSLAGSSGPGASSGTSGDHGELV | EF1D_HUMAN  |             |             | Elongation factor 1-delta;   | -0.34                           | 0.03                  | 54.70                | 6.73 |
| RARENIQKSL | AGSSGPGASSGTSGDHGELVVR    | EF1D_HUMAN  |             |             | Elongation factor 1-delta;   | -0.37                           | 0.04                  | 37.80                | 0.84 |
| DIARARENIQ | KSLAGSSGPGASSGTSGDHGELVV  | EF1D_HUMAN  |             |             | Elongation factor 1-delta;   | -0.49                           | 0.03                  | 63.40                | 2.68 |
| AKDPFAHLPK | STFVLDEFKR                | EF1G_HUMAN  |             |             | Elongation factor 1-         | 1.15                            | 0.07                  | 33.10                | 0.61 |
| TYPENWRAFK | ALIAAQYSGAQVR             | EF1G_HUMAN  |             |             | Elongation factor 1-gamma;   | 0.78                            | 0.06                  | 77.50                | 2.69 |
| SVIAHVDHGK | STLTDSLVCAGIIASAR         | EF2_HUMAN   |             |             | Elongation factor 2;         | 0.63                            | 0.02                  | 32.60                | 2.50 |
|            | MVNFTVDQIR                | EF2_HUMAN   |             |             | Elongation factor 2;         | 0.13                            | 0.01                  | 32.30                | 1.15 |
| GQIIPARRC  | LYASVLTAQPR               | EF2_HUMAN   |             |             | Elongation factor 2;         | -2.24                           | 0.32                  | 40.50                | 3.19 |
|            | MVAPVLETSHVFCCPNR         | ELP2_HUMAN  |             |             | Elongator complex protein 2; | 0.35                            | 0.02                  | 31.10                | 0.89 |
| SCSLSPSLA  | ETVHCDLQPVGPER            | EGLN_HUMAN  |             |             | Endoglin;                    | 1.31                            | 0.11                  | 36.90                | 1.14 |
| MMKREYRGQR | SVKALADYIR                | ERP44_HUMAN |             |             | Endoplasmic reticulum        | -0.69                           | 0.04                  | 35.20                | 1.93 |
| FYSNKEIFLR | ELISNASDALDKIR            | ENPL_HUMAN  | H90B2_HUMAN | H90B3_HUMAN | Endoplasmic;                 | 1.68                            | 0.12                  | 38.30                | 2.00 |
| VVLFETATLR | SGYLLPDTKAYGDR            | ENPL_HUMAN  |             |             | Endoplasmic;                 | 0.87                            | 0.07                  | 22.70                | 2.58 |

Table S6

| Non-prime  | Prime                    | Id 1        | Id 2        | Id 3 | Protein (Id1)                                         | Fold-change (log <sub>2</sub> ) | Fc standard deviation | X! Tandem hyperscore | ppm   |
|------------|--------------------------|-------------|-------------|------|-------------------------------------------------------|---------------------------------|-----------------------|----------------------|-------|
| LLVPAHLVAA | WSNNYAVDCPQHCDSSSECKSSPR | ESM1_HUMAN  |             |      | Endothelial cell-specific                             | 3.96                            | 0.38                  | 43.30                | 7.32  |
| GLVRLVHQER | TLAFPLTIR                | EPCR_HUMAN  |             |      | Endothelial protein C receptor;                       | 2.17                            | 0.13                  | 27.70                | 1.59  |
| LAAGLVACLA | ALGIQYQTR                | ECE1_HUMAN  |             |      | Endothelin-converting enzyme 1;                       | 1.68                            | 0.12                  | 35.70                | 3.34  |
| LRRLQEREL  | VEPLTPSGEAPNQALLR        | EGFR_HUMAN  |             |      | Epidermal growth factor receptor;                     | 3.22                            | 0.26                  | 50.40                | 6.09  |
| FFPKEAKPNG | IFKGSTAENAEYLR           | EGFR_HUMAN  |             |      | Epidermal growth factor receptor;                     | 1.24                            | 0.11                  | 41.80                | 4.47  |
| SPSTSRTPLL | SSLSATSNNSTVACIDR        | EGFR_HUMAN  |             |      | Epidermal growth factor receptor;                     | 1.03                            | 0.12                  | 81.30                | 3.92  |
| VACIDRNLQ  | SCPIKEDSFLQR             | EGFR_HUMAN  |             |      | Epidermal growth factor receptor;                     | 0.89                            | 0.10                  | 29.90                | 1.61  |
| RYACCPGWKR | TSGLPGACGAAICQPPCR       | EGFL7_HUMAN |             |      | Epidermal growth factor-like protein 7;               | 1.89                            | 0.16                  | 61.30                | 0.74  |
| PRYACCPGWK | RTSGLPGACGAAICQPPCR      | EGFL7_HUMAN |             |      | Epidermal growth factor-like protein 7;               | 1.64                            | 0.16                  | 70.10                | 4.86  |
| ILQQIELDLK | ATQALVLAPTR              | IF4A1_HUMAN |             |      | Eukaryotic initiation factor 4A-I;                    | 0.68                            | 0.06                  | 41.60                | -0.09 |
| RRYLSPKWIK | MFVLDEADEMLSR            | IF4A1_HUMAN | IF4A2_HUMAN |      | Eukaryotic initiation factor 4A-I;                    | 0.38                            | 0.05                  | 67.80                | 5.22  |
| PGYGAYDAFK | HAVSDPSILDSLNLNEDER      | IF2A_HUMAN  |             |      | Eukaryotic translation initiation factor 2 subunit    | 0.68                            | 0.04                  | 52.30                | 2.83  |
| SEKPLRSIKR | IFHTVTTTDDPVIR           | EIF3D_HUMAN |             |      | Eukaryotic translation initiation factor 3 subunit    | 1.50                            | 0.09                  | 33.00                | 0.55  |
| SVAYRYRRWK | LGDDIDLIVR               | EIF3D_HUMAN |             |      | Eukaryotic translation initiation factor 3 subunit D; | 0.60                            | 0.04                  | 27.40                | 4.92  |
|            | M KPILLQGHER             | EIF3I_HUMAN |             |      | Eukaryotic translation initiation factor 3 subunit    | 0.38                            | 0.01                  | 51.50                | 2.25  |
| SGELNQYSAK | SGEVLVNVKEHSR            | EIF3I_HUMAN |             |      | Eukaryotic translation initiation factor 3 subunit    | 0.00                            | 0.00                  | 33.00                | 2.43  |
| LAKETFGVNN | AVYGIDAMNPSSR            | EIF3J_HUMAN |             |      | Eukaryotic translation initiation factor 3 subunit    | 0.04                            | 0.00                  | 56.50                | 1.06  |

Table S6

| Non-prime  | Prime                  | Id 1        | Id 2        | Id 3 | Protein (Id1)                                    | Fold-change (log <sub>2</sub> ) | Fc standard deviation | X! Tandem hyperscore | ppm   |
|------------|------------------------|-------------|-------------|------|--------------------------------------------------|---------------------------------|-----------------------|----------------------|-------|
| RPIDTSRLTK | ITKPGSIDSNNQLFAPGGR    | IF4G1_HUMAN |             |      | Eukaryotic translation initiation factor 4 gamma | 0.89                            | 0.08                  | 38.50                | 0.64  |
| QEEQRREMLE | TVKQLTGGVDVER          | IF4G3_HUMAN |             |      | Eukaryotic translation                           | 0.31                            | 0.02                  | 44.40                | 2.06  |
| IVPAAATTVS | SPSAAITVQR             | IF4G3_HUMAN |             |      | Eukaryotic translation initiation factor 4 gamma | -0.37                           | 0.03                  | 29.30                | 2.08  |
| SSASTSQSTR | AASIFGGAKPVDTAAR       | IF4B_HUMAN  |             |      | Eukaryotic translation initiation factor 4B;     | 0.80                            | 0.08                  | 36.50                | -0.31 |
| RMDEISDHAK | VLTLSDDLER             | IF5_HUMAN   |             |      | Eukaryotic translation initiation factor 5;      | 1.39                            | 0.04                  | 39.40                | 3.95  |
| IKRNDFQLIG | IQDGYLSLLQDSGEVR       | IF5A1_HUMAN |             |      | Eukaryotic translation                           | 0.20                            | 0.02                  | 85.50                | 1.10  |
| DFQLIGIQDG | YLSLLQDSGEVR           | IF5A1_HUMAN |             |      | Eukaryotic translation                           | -0.07                           | 0.01                  | 55.50                | 4.95  |
| MADDDL     | FETGDAGASATFPMQCSALR   | IF5A1_HUMAN | IF5AL_HUMAN |      | Eukaryotic translation initiation factor 5A-1;   | -1.00                           | 0.04                  | 98.20                | 3.25  |
| ADDLDFETGD | AGASATFPMQCSALR        | IF5A1_HUMAN | IF5AL_HUMAN |      | Eukaryotic translation initiation factor 5A-1;   | -1.19                           | 0.05                  | 61.90                | 3.49  |
| MAAGFK     | TVEPLEYYR              | EXOS8_HUMAN |             |      | Exosome complex component RRP43;                 | 0.46                            | 0.02                  | 33.60                | 2.32  |
| M          | KETPLSNCR              | EXOS9_HUMAN |             |      | Exosome complex component RRP45;                 | 0.17                            | 0.01                  | 33.70                | 2.37  |
| QQAREMPLLK | SEVAAGVKKSGPLPSAER     | EXOSX_HUMAN |             |      | Exosome component 10;                            | 0.78                            | 0.07                  | 34.80                | 0.26  |
| VLLLVAGALT | ALLPSVKEDKMLMLR        | EXTL2_HUMAN |             |      | Exostosin-like 2;                                | 1.00                            | 0.06                  | 30.30                | 0.55  |
| VLTYLAVASA | ASEGGFTATGQR           | ECM1_HUMAN  |             |      | Extracellular matrix protein 1;                  | 1.54                            | 0.04                  | 46.60                | 2.23  |
| MVFLVACALH | IALDLLPR               | DMP4_HUMAN  |             |      | Extracellular serine/threonine protein           | -1.40                           | 0.07                  | 28.90                | 2.87  |
| ASYVRSRSIR | SVAIEVDGR              | SULF2_HUMAN |             |      | Extracellular sulfatase Sulf-2;                  | 0.48                            | 0.03                  | 44.90                | 3.69  |
| YEPVSYHVQE | SLQDEGAEPTGYSAELSSEGIR | EZRI_HUMAN  |             |      | Ezrin;                                           | -0.46                           | 0.04                  | 56.70                | -1.33 |
| EFNEVFNDVR | LLLNNNDLLR             | CAZA1_HUMAN | CAZA2_HUMAN |      | F-actin-capping protein subunit alpha-1;         | 5.88                            | 0.60                  | 39.50                | 8.80  |
| MLWLQTNKSG | SGTMNLGGSLTR           | CAPZB_HUMAN |             |      | F-actin-capping protein                          | 0.04                            | 0.01                  | 54.50                | 0.49  |

Table S6

| Non-prime  | Prime               | Id 1        | Id 2        | Id 3 | Protein (Id1)                               | Fold-change (log <sub>2</sub> ) | Fc standard deviation | X! Tandem hyperscore | ppm   |
|------------|---------------------|-------------|-------------|------|---------------------------------------------|---------------------------------|-----------------------|----------------------|-------|
| KVGGDACLR  | GSDPGGPGLLPPR       | FXL19_HUMAN |             |      | F-box/LRR-repeat protein 19;                | 0.15                            | 0.01                  | 26.90                | 4.14  |
| PVEAFAQNVL | SKADVIQATGDAICIFR   | SSRP1_HUMAN |             |      | FACT complex subunit SSRP1;                 | 0.97                            | 0.04                  | 60.30                | 1.76  |
| KQLQERAGVK | MILIQDGSQNTNVDKPLR  | FUBP2_HUMAN |             |      | Far upstream element-binding protein 2;     | 0.24                            | 0.03                  | 33.80                | 1.89  |
| GGGIDVPVPR | HSVGVVIGR           | FUBP2_HUMAN |             |      | Far upstream element-binding protein 2;     | 0.09                            | 0.01                  | 26.00                | 2.30  |
| VQEIMIPAGK | AGLVIGKGGETIKQLQER  | FUBP2_HUMAN | FUBP1_HUMAN |      | Far upstream element-                       | -0.09                           | 0.01                  | 40.60                | -0.15 |
| GAPESVQKAK | MMLDDIVSR           | FUBP2_HUMAN |             |      | Far upstream element-                       | -0.52                           | 0.05                  | 39.80                | 0.81  |
| APESVQKAKM | MLDDIVSR            | FUBP2_HUMAN |             |      | Far upstream element-binding protein 2;     | -0.55                           | 0.06                  | 29.40                | 2.95  |
| ESKKLASQGD | SISSQLGPIHPPPR      | FUBP2_HUMAN |             |      | Far upstream element-binding protein 2;     | -1.52                           | 0.04                  | 44.50                | 1.05  |
| PSVYGYGVQK | RPLDDGVGNQLGALVHQR  | FUBP3_HUMAN |             |      | Far upstream element-binding protein 3;     | 0.57                            | 0.04                  | 29.80                | 2.27  |
| FVQHFSQIVR | VLTEDEMGHPEIGDAIAR  | FPPS_HUMAN  |             |      | Farnesyl pyrophosphate synthase;            | 6.38                            | 0.94                  | 50.40                | 3.18  |
| PEIPALLDGR | LQVVDQPLPVR         | FAS_HUMAN   |             |      | Fatty acid synthase;                        | 2.59                            | 0.26                  | 37.50                | 3.64  |
| VLHQATILPK | TGTVSLEVR           | FAS_HUMAN   |             |      | Fatty acid synthase;                        | 2.17                            | 0.18                  | 36.40                | -1.11 |
| QTKVTQQGLK | MVVPGLDGAQIPR       | FAS_HUMAN   |             |      | Fatty acid synthase;                        | 1.40                            | 0.05                  | 42.90                | 4.70  |
| SKADEASELA | CPTPKEDGLAQQQTQLNLR | FAS_HUMAN   |             |      | Fatty acid synthase;                        | 0.59                            | 0.04                  | 63.60                | 1.29  |
| NTEGSFRCQC | LGGLAVGTDGR         | FBN3_HUMAN  |             |      | Fibrillin-3;                                | 5.16                            | 0.49                  | 26.90                | 4.31  |
| FPESSLKLV  | STLFGNTKPR          | FGFP1_HUMAN |             |      | Fibroblast growth factor-binding protein 1; | 3.60                            | 0.36                  | 21.80                | 2.18  |
| TSCLKLKDER | VYWKQVAR            | FGFP1_HUMAN |             |      | Fibroblast growth factor-binding protein 1; | 3.53                            | 0.39                  | 33.20                | -0.09 |
| RKDFPESSLK | LVSSTLFGNTKPR       | FGFP1_HUMAN |             |      | Fibroblast growth factor-                   | -0.55                           | 0.05                  | 17.50                | 1.54  |



Table S6

| Non-prime  | Prime                    | Id 1        | Id 2 | Id 3 | Protein (Id1)                     | Fold-change (log <sub>2</sub> ) | Fc standard deviation | X! Tandem hyperscore | ppm  |
|------------|--------------------------|-------------|------|------|-----------------------------------|---------------------------------|-----------------------|----------------------|------|
| NEHLKCVSKR | IANLQTDLSDGLR            | FLNA_HUMAN  |      |      | Filamin-A;                        | 7.52                            | 1.10                  | 59.00                | 3.39 |
| QTGGPHVKAR | VANPSGNLTETYVQDR         | FLNA_HUMAN  |      |      | Filamin-A;                        | 1.32                            | 0.10                  | 81.90                | 5.11 |
| DVTYDGPVVP | SSPFQVPVTEGCDPSR         | FLNA_HUMAN  |      |      | Filamin-A;                        | 0.99                            | 0.07                  | 55.80                | 6.06 |
| LHSVDTVYDG | SPVPSSPFQVPVTEGCDPSR     | FLNA_HUMAN  |      |      | Filamin-A;                        | 0.35                            | 0.02                  | 49.40                | 7.76 |
| PVPGSPFPLE | AVAPTKPSKVKAFGPGLQGGSAGS | FLNA_HUMAN  |      |      | Filamin-A;                        | -0.02                           | 0.00                  | 37.30                | 4.11 |
| PGIEGQGVFR | EATTEFSVDAR              | FLNA_HUMAN  |      |      | Filamin-A;                        | -0.40                           | 0.03                  | 51.10                | 0.64 |
| TQTVNYVPSR | EGPYSISVLYGDEEVPR        | FLNA_HUMAN  |      |      | Filamin-A;                        | -0.80                           | 0.04                  | 99.50                | 3.70 |
| FNEEHIPDSP | FVVPVASPSGDAR            | FLNA_HUMAN  |      |      | Filamin-A;                        | -1.04                           | 0.07                  | 44.30                | 3.67 |
| EPVDVVDNAD | GTQTVNYVPSR              | FLNA_HUMAN  |      |      | Filamin-A;                        | -1.52                           | 0.09                  | 42.50                | 2.47 |
| SSSSRGSSYS | SIPKFSSDASKVVTR          | FLNC_HUMAN  |      |      | Filamin-C;                        | -0.32                           | 0.02                  | 45.50                | 3.59 |
| VRVEESTQVG | GDPFPAVFGDFLGR           | FLNC_HUMAN  |      |      | Filamin-C;                        | -0.52                           | 0.08                  | 63.00                | 0.20 |
| KSSSSRGSSY | SSIPKFSSDASKVVTR         | FLNC_HUMAN  |      |      | Filamin-C;                        | -0.65                           | 0.02                  | 53.70                | 1.54 |
| SYAECSVPIG | VTAPSLQPVQAR             | FNBP4_HUMAN |      |      | Formin-binding protein 4;         | -0.76                           | 0.05                  | 31.30                | 5.15 |
| GSLKTRFALL | TLAAGADGPPR              | FJX1_HUMAN  |      |      | Four-jointed box protein 1;       | 1.18                            | 0.06                  | 47.80                | 7.64 |
| QSVYLMNLRK | SGTLGHPGSLDETTYER        | FRDA_HUMAN  |      |      | Frataxin, mitochondrial;          | -0.96                           | 0.07                  | 58.80                | 1.29 |
| IFLPLLRGHS | LFTCEPITVPR              | FZD6_HUMAN  |      |      | Frizzled-6;                       | 5.78                            | 0.36                  | 26.40                | 7.53 |
| KKELSDIAHR | IVAPGKGILAADESTGSIKR     | ALDOA_HUMAN |      |      | Fructose-bisphosphate aldolase A; | 3.42                            | 0.11                  | 28.70                | 0.56 |

Table S6

| Non-prime  | Prime                | Id 1        | Id 2        | Id 3 | Protein (Id1)                                     | Fold-change (log <sub>2</sub> ) | Fc standard deviation | X! Tandem hyperscore | ppm   |
|------------|----------------------|-------------|-------------|------|---------------------------------------------------|---------------------------------|-----------------------|----------------------|-------|
| NTEENRRFYR | QLLLTADDR            | ALDOA_HUMAN |             |      | Fructose-bisphosphate aldolase A;                 | 2.87                            | 0.13                  | 35.60                | 0.65  |
| MP         | YQYPALTPEQKKEISDIAHR | ALDOA_HUMAN |             |      | Fructose-bisphosphate aldolase A;                 | 0.15                            | 0.01                  | 30.80                | 2.75  |
| WRCVLKIGEH | TPSALAIMENANVLAR     | ALDOA_HUMAN |             |      | Fructose-bisphosphate aldolase A;                 | -0.07                           | 0.00                  | 34.40                | 1.05  |
| ARYASICQQN | GIVPIVEPEILPDGDHDLKR | ALDOA_HUMAN | ALDOC_HUMAN |      | Fructose-bisphosphate aldolase A;                 | -0.46                           | 0.02                  | 38.80                | 2.86  |
| MP         | HSYPALSAEQKKEISDIALR | ALDOC_HUMAN |             |      | Fructose-bisphosphate aldolase A;                 | -0.37                           | 0.03                  | 33.30                | 3.54  |
| TDPQTLKPSG | FHEDDPFFYDEHTLR      | FXVD5_HUMAN |             |      | FXVD domain-containing ion transport regulator 5; | 3.33                            | 0.23                  | 67.30                | 1.35  |
| QTLKPSGFHE | DDPFFYDEHTLR         | FXVD5_HUMAN |             |      | FXVD domain-containing                            | 2.15                            | 0.15                  | 32.00                | 3.34  |
| DPQTLKPSGF | HEDDPFFYDEHTLR       | FXVD5_HUMAN |             |      | FXVD domain-containing                            | 1.92                            | 0.22                  | 39.50                | 5.19  |
| LCALLAPGGA | YVLDDSDGLGR          | GALC_HUMAN  |             |      | Galactocerebrosidase;                             | 0.85                            | 0.07                  | 36.60                | 4.02  |
| M          | ACGLVASNLNLKPGECLR   | LEG1_HUMAN  |             |      | Galectin-1;                                       | 0.00                            | 0.00                  | 33.80                | 3.28  |
| RSTHTLDSLR | ELSEALGQIFDSQR       | LG3BP_HUMAN |             |      | Galectin-3-binding protein;                       | 4.37                            | 0.35                  | 80.60                | 2.22  |
| AGVVCTNETR | STHTLDSLR            | LG3BP_HUMAN |             |      | Galectin-3-binding                                | 3.86                            | 0.36                  | 31.80                | 1.61  |
| QSRGPLVKY  | SSDYFQAPSDYR         | LG3BP_HUMAN |             |      | Galectin-3-binding                                | 2.80                            | 0.15                  | 44.90                | 1.78  |
| VEIFYRGQWG | TVCDNLWDLTDASVVC     | LG3BP_HUMAN |             |      | Galectin-3-binding protein;                       | 2.11                            | 0.17                  | 31.20                | -0.15 |
| KKTLQALEFH | TVPFQLLAR            | LG3BP_HUMAN |             |      | Galectin-3-binding protein;                       | 1.62                            | 0.07                  | 25.00                | 2.59  |
| SCWNYGFSC  | SDELPLGLTKSGGSDR     | LG3BP_HUMAN |             |      | Galectin-3-binding protein;                       | 1.48                            | 0.03                  | 32.50                | 0.39  |
| TIQSCWNYGF | SCSSDELPLGLTKSGGSDR  | LG3BP_HUMAN |             |      | Galectin-3-binding protein;                       | 1.39                            | 0.04                  | 37.00                | 1.41  |
| SRRGPLVKYS | SDYFQAPSDYR          | LG3BP_HUMAN |             |      | Galectin-3-binding                                | 1.29                            | 0.12                  | 51.90                | 1.74  |
| VTDSWSARK  | SQLVYQSR             | LG3BP_HUMAN |             |      | Galectin-3-binding                                | 1.19                            | 0.05                  | 28.00                | 3.84  |
| RKSQLVYQSR | RGPLVKYSSDYFQAPSDYR  | LG3BP_HUMAN |             |      | Galectin-3-binding                                | 1.16                            | 0.05                  | 33.10                | 5.20  |
| QSCWNYGFSC | SDELPLGLTKSGGSDR     | LG3BP_HUMAN |             |      | Galectin-3-binding protein;                       | 1.08                            | 0.02                  | 47.90                | 0.96  |

Table S6

| Non-prime   | Prime                    | Id 1        | Id 2 | Id 3 | Protein (Id1)                               | Fold-change (log <sub>2</sub> ) | Fc standard deviation | X! Tandem hyperscore | ppm   |
|-------------|--------------------------|-------------|------|------|---------------------------------------------|---------------------------------|-----------------------|----------------------|-------|
| YQSRRGPLVK  | YSSDYFQAPSDYR            | LG3BP_HUMAN |      |      | Galectin-3-binding protein;                 | 1.08                            | 0.16                  | 63.70                | 2.95  |
| ETRSTHTLDL  | SRELSEALGQIFDSQR         | LG3BP_HUMAN |      |      | Galectin-3-binding protein;                 | 1.03                            | 0.03                  | 52.10                | 1.34  |
| THTLDLSREL  | SEALGQIFDSQR             | LG3BP_HUMAN |      |      | Galectin-3-binding protein;                 | 0.98                            | 0.06                  | 55.80                | 2.46  |
| WKEPGSNVTM  | SVDAECVPMVR              | LG3BP_HUMAN |      |      | Galectin-3-binding protein;                 | 0.75                            | 0.05                  | 48.20                | 2.63  |
| RRGPLVKYSS  | DYFQAPSDYR               | LG3BP_HUMAN |      |      | Galectin-3-binding protein;                 | -1.04                           | 0.09                  | 26.80                | 4.63  |
| RGPLVKYSSD  | YFQAPSDYR                | LG3BP_HUMAN |      |      | Galectin-3-binding                          | -2.72                           | 0.72                  | 20.50                | 0.68  |
| APAGPLIVPY  | NLPLPGGVVPR              | LEG3_HUMAN  |      |      | Galectin-3;                                 | 4.34                            | 0.35                  | 31.90                | -0.87 |
| VVSSVNTVAT  | KTVEEAENIAVTSGVVR        | SYUG_HUMAN  |      |      | Gamma-synuclein;                            | 0.54                            | 0.06                  | 41.30                | -0.80 |
| VSEAVVSSVN  | TVATKTVEEAENIAVTSGVVR    | SYUG_HUMAN  |      |      | Gamma-synuclein;                            | 0.37                            | 0.02                  | 77.90                | 6.14  |
| LLAAPAQ AHL | KKPSQLSSFSWDCDEGK DPAVIR | SAP3_HUMAN  |      |      | Ganglioside GM2                             | 0.45                            | 0.02                  | 52.00                | 6.65  |
| HLKKPSQLSS  | FSWDCDEGK DPAVIR         | SAP3_HUMAN  |      |      | Ganglioside GM2 activator;                  | 0.13                            | 0.01                  | 40.20                | 2.19  |
| AHLKKPSQLS  | SFSWDCDEGK DPAVIR        | SAP3_HUMAN  |      |      | Ganglioside GM2 activator;                  | -0.02                           | 0.00                  | 39.40                | 5.95  |
| KKGGVASGFK  | HVVPNEVVVQR              | GELS_HUMAN  |      |      | Gelsolin;                                   | 0.51                            | 0.05                  | 48.10                | 1.75  |
| ETLIKKRKAR  | SLLPLSTSLDHR             | GEMI5_HUMAN |      |      | Gem-associated protein 5;                   | 1.72                            | 0.03                  | 43.90                | 1.10  |
| RRKKYGIVLK  | EFRPEDQPWLLR             | T2FA_HUMAN  |      |      | General transcription factor IIF subunit 1; | -0.26                           | 0.01                  | 27.90                | 0.68  |
| IHQGTMIPC   | DFLIPVQTQHPIR            | G6PI_HUMAN  |      |      | Glucose-6-phosphate isomerase;              | -0.52                           | 0.02                  | 33.20                | 4.38  |
| EELPLGRELR  | VPLIGSLPEAR              | QPCTL_HUMAN |      |      | Glutaminyl-peptide cyclotransferase-like    | -1.29                           | 0.13                  | 29.00                | 4.80  |

Table S6

| Non-prime  | Prime               | Id 1        | Id 2       | Id 3 | Protein (Id1)                             | Fold-change (log <sub>2</sub> ) | Fc standard deviation | X! Tandem hyperscore | ppm   |
|------------|---------------------|-------------|------------|------|-------------------------------------------|---------------------------------|-----------------------|----------------------|-------|
| RHASSGSFLP | SANEHLKEDLNL        | GLRX3_HUMAN |            |      | Glutaredoxin-3;                           | -0.02                           | 0.00                  | 28.40                | 4.69  |
| KNSQKIDRLD | GAHAPELTKKVQR       | GLRX3_HUMAN |            |      | Glutaredoxin-3;                           | -0.32                           | 0.01                  | 26.80                | 4.86  |
| MPP        | YTVVYFPVR           | GSTP1_HUMAN |            |      | Glutathione S-transferase P;              | 0.57                            | 0.04                  | 29.30                | -0.42 |
| QLPKFQDGL  | TLYQSNTILR          | GSTP1_HUMAN |            |      | Glutathione S-transferase                 | -0.19                           | 0.01                  | 43.70                | 2.09  |
| NGKLTGMAFR | VPTANVSVDLTCR       | G3P_HUMAN   |            |      | Glyceraldehyde-3-phosphate dehydrogenase; | 1.60                            | 0.11                  | 68.20                | 3.65  |
| KLTGMAFRVP | TANVSVDLTCR         | G3P_HUMAN   |            |      | Glyceraldehyde-3-phosphate dehydrogenase; | 0.81                            | 0.06                  | 59.10                | 2.34  |
| IIPASTGAAK | AVGKVIPELNGKLTGMAFR | G3P_HUMAN   |            |      | Glyceraldehyde-3-phosphate dehydrogenase; | 0.17                            | 0.00                  | 37.50                | 1.63  |
| M          | GKVKVGVNGFGR        | G3P_HUMAN   |            |      | Glyceraldehyde-3-phosphate dehydrogenase; | 0.06                            | 0.00                  | 58.80                | 2.57  |
| KAENGKLVIN | GNPITIFQER          | G3P_HUMAN   |            |      | Glyceraldehyde-3-phosphate dehydrogenase; | 0.04                            | 0.00                  | 44.50                | -3.80 |
| GMAFRVPTAN | VSVVDLTCR           | G3P_HUMAN   | G3PT_HUMAN |      | Glyceraldehyde-3-phosphate dehydrogenase; | 0.04                            | 0.00                  | 23.30                | 2.12  |
| KFHGTVKAEN | GKLVINGNPITIFQER    | G3P_HUMAN   |            |      | Glyceraldehyde-3-                         | -0.04                           | 0.00                  | 34.70                | 7.28  |
| MAFRVPTANV | SVVDLTCR            | G3P_HUMAN   | G3PT_HUMAN |      | Glyceraldehyde-3-phosphate dehydrogenase; | -0.11                           | 0.01                  | 26.20                | 1.64  |
| ELNGKLTGMA | FRVPTANVSVDLTCR     | G3P_HUMAN   |            |      | Glyceraldehyde-3-phosphate dehydrogenase; | -0.21                           | 0.02                  | 48.30                | 3.05  |
| LNGKLTGMAF | RVPTANVSVDLTCR      | G3P_HUMAN   |            |      | Glyceraldehyde-3-                         | -0.58                           | 0.04                  | 43.70                | 1.92  |
| GIVEGLMTTV | HAITATQKTVDGPSGKLWR | G3P_HUMAN   |            |      | Glyceraldehyde-3-phosphate dehydrogenase; | -1.09                           | 0.07                  | 27.90                | -1.84 |
| EKRKQISVRG | LAGLGDVAEVR         | PYGB_HUMAN  |            |      | Glycogen phosphorylase, brain form;       | 5.53                            | 0.17                  | 29.10                | -1.94 |
| SEKRKQISVR | GLAGLGDVAEVR        | PYGB_HUMAN  |            |      | Glycogen phosphorylase,                   | -1.04                           | 0.09                  | 63.40                | -1.86 |
| SGAISHLSLG | EIPAMAQPFSSEER      | GLYG_HUMAN  |            |      | Glycogenin-1;                             | -0.32                           | 0.02                  | 43.90                | 0.00  |

Table S6

| Non-prime  | Prime                   | Id 1        | Id 2 | Id 3 | Protein (Id1)                            | Fold-change (log <sub>2</sub> ) | Fc standard deviation | X! Tandem hyperscore | ppm   |
|------------|-------------------------|-------------|------|------|------------------------------------------|---------------------------------|-----------------------|----------------------|-------|
| LAILLVIFIF | TKVFLIDNLD TSAANR       | XYLK_HUMAN  |      |      | Glycosaminoglycan xylosylkinase;         | 2.30                            | 0.15                  | 39.50                | 5.72  |
| LVIFFTKVF  | LIDNLD TSAANR           | XYLK_HUMAN  |      |      | Glycosaminoglycan                        | 1.19                            | 0.09                  | 47.20                | 3.89  |
| QFWDTPVVK  | LGEVVNTHGPEPDKDNIR      | NMT1_HUMAN  |      |      | Glycylpeptide N-                         | 0.87                            | 0.06                  | 35.80                | 1.77  |
| WDTQPVKLG  | EVVNTHGPEPDKDNIR        | NMT1_HUMAN  |      |      | Glycylpeptide N-tetradecanoyltransferase | -0.34                           | 0.04                  | 34.00                | 2.16  |
| KKLPAQRTNR | AVALSSSVMCPDAR          | GRN_HUMAN   |      |      | Granulins;                               | 0.60                            | 0.04                  | 63.40                | 2.20  |
| PAQRTNRAVA | LSSSVMCPDAR             | GRN_HUMAN   |      |      | Granulins;                               | 0.20                            | 0.01                  | 39.10                | 0.72  |
| LTKLPAHTVG | DVKCDMEVSCPDGYTCCR      | GRN_HUMAN   |      |      | Granulins;                               | -0.46                           | 0.04                  | 69.40                | 0.56  |
| LVAAGRRAAG | ASVATELR                | GROA_HUMAN  |      |      | Growth-regulated alpha protein;          | 3.01                            | 0.22                  | 26.70                | 2.86  |
| ALELRPRGEA | AEGPAAAAAAAAAAAAAGVGGEI | GDF11_HUMAN |      |      | Growth/differentiation factor 11;        | 0.70                            | 0.02                  | 59.30                | -2.75 |
| GGHLHLRISR | AALPEGLPEASR            | GDF15_HUMAN |      |      | Growth/differentiation factor 15;        | 2.01                            | 0.15                  | 33.40                | 5.24  |
| GALSLAEASR | ASFPGPSELHSEDSR         | GDF15_HUMAN |      |      | Growth/differentiation factor 15;        | 0.17                            | 0.00                  | 36.00                | -0.18 |
| AQGEPVQVK  | LVLVGDGGTGKTFVVKR       | RAN_HUMAN   |      |      | GTP-binding nuclear                      | 0.67                            | 0.06                  | 30.40                | 2.32  |
| TTACYFATIH | TDSSLLLADITDKFGQR       | GUAD_HUMAN  |      |      | Guanine deaminase;                       | -0.52                           | 0.05                  | 49.90                | 3.33  |
| IVTPRFSLSC | SETLMGELGNIKTR          | GUAD_HUMAN  |      |      | Guanine deaminase;                       | -0.55                           | 0.02                  | 36.60                | -0.77 |
| MCAA       | QMPPLAHIFR              | GUAD_HUMAN  |      |      | Guanine deaminase;                       | -0.72                           | 0.04                  | 33.30                | 1.53  |
| NKTVMAHGCV | LSAEELNVFHER            | GUAD_HUMAN  |      |      | Guanine deaminase;                       | -1.29                           | 0.10                  | 50.80                | 1.35  |
| MCAAQ      | MPPLAHIFR               | GUAD_HUMAN  |      |      | Guanine deaminase;                       | -1.80                           | 0.06                  | 15.60                | 2.59  |
| TACYFATIHT | DSSLLLADITDKFGQR        | GUAD_HUMAN  |      |      | Guanine deaminase;                       | -2.24                           | 0.21                  | 45.00                | 2.54  |

Table S6

| Non-prime  | Prime                   | Id 1        | Id 2        | Id 3        | Protein (Id1)                              | Fold-change (log <sub>2</sub> ) | Fc standard deviation | X! Tandem hyperscore | ppm   |
|------------|-------------------------|-------------|-------------|-------------|--------------------------------------------|---------------------------------|-----------------------|----------------------|-------|
| FNESIVVDMK | SGFNLEELEKNNNAQSIR      | GNL3_HUMAN  |             |             | Guanine nucleotide-binding protein-like 3; | 0.72                            | 0.04                  | 40.60                | 2.49  |
|            | M FLQYYLNEQGDR          | NOP10_HUMAN |             |             | H/ACA ribonucleoprotein complex subunit 3; | 0.02                            | 0.00                  | 60.00                | 3.74  |
| AKKEVVAEVV | KAPQVVAEAAKTAKR         | DKC1_HUMAN  |             |             | H/ACA ribonucleoprotein                    | -0.83                           | 0.03                  | 32.80                | 4.45  |
| PSVEPVEEYD | YEDLKESSNSVSNHQLSGFDQAR | HBS1L_HUMAN |             |             | HBS1-like protein;                         | -3.24                           | 0.61                  | 37.00                | -1.38 |
| FNDSQRQATK | DAGVIAGLNVLR            | HS71L_HUMAN | HSP71_HUMAN |             | Heat shock 70 kDa protein 1-like;          | 0.89                            | 0.06                  | 40.20                | -0.49 |
| GAIAGLNVLR | IINEPTAAAIAYGLDR        | HSP71_HUMAN | HSP76_HUMAN |             | Heat shock 70 kDa protein 1A/1B;           | 4.25                            | 0.55                  | 42.10                | 1.46  |
| TLEPVEKALR | DAKLDKAQIHDLVLVGGSTR    | HSP71_HUMAN |             |             | Heat shock 70 kDa protein 1A/1B;           | 0.72                            | 0.05                  | 40.60                | -0.27 |
| KALRDAKLDK | AQIHDLVLVGGSTR          | HSP71_HUMAN |             |             | Heat shock 70 kDa protein 1A/1B;           | 0.17                            | 0.01                  | 43.40                | 1.93  |
| VPAYFNDSQR | QATKDAGTIAGLNVLR        | HSP7C_HUMAN |             |             | Heat shock cognate 71 kDa protein;         | 10.56                           | 0.00                  | 59.60                | -4.21 |
| SYVAFTDTER | LIGDAAKNQVAMNPTNTVFDKAR | HSP7C_HUMAN |             |             | Heat shock cognate 71 kDa protein;         | 5.12                            | 0.33                  | 41.90                | 1.64  |
| EIIANDQGNR | TTPSYVAFTDTER           | HSP7C_HUMAN | HS71L_HUMAN | HSP71_HUMAN | Heat shock cognate 71                      | 1.84                            | 0.10                  | 63.80                | 6.26  |
| GTIAGLNVLR | IINEPTAAAIAYGLDKKVGAEER | HSP7C_HUMAN |             |             | Heat shock cognate 71                      | 1.38                            | 0.04                  | 56.40                | 7.98  |
| DFYTSITRAR | FEELNADLFR              | HSP7C_HUMAN | HSP72_HUMAN |             | Heat shock cognate 71 kDa protein;         | 1.27                            | 0.07                  | 29.40                | 2.03  |
| GIDFYTSITR | ARFEELNADLFR            | HSP7C_HUMAN | HSP72_HUMAN |             | Heat shock cognate 71 kDa protein;         | 1.10                            | 0.07                  | 50.70                | 1.59  |
| EELNADLFRG | TLDPVEKALR              | HSP7C_HUMAN |             |             | Heat shock cognate 71 kDa protein;         | 0.93                            | 0.06                  | 20.30                | 2.97  |
| FEELNADLFR | GTLDPVEKALR             | HSP7C_HUMAN |             |             | Heat shock cognate 71 kDa protein;         | 0.71                            | 0.03                  | 25.40                | 1.34  |
| FNDSQRQATK | DAGTIAGLNVLR            | HSP7C_HUMAN |             |             | Heat shock cognate 71 kDa protein;         | 0.22                            | 0.02                  | 55.10                | 1.54  |

Table S6

| Non-prime  | Prime                | Id 1        | Id 2        | Id 3        | Protein (Id1)                         | Fold-change (log <sub>2</sub> ) | Fc standard deviation | X! Tandem hyperscore | ppm   |
|------------|----------------------|-------------|-------------|-------------|---------------------------------------|---------------------------------|-----------------------|----------------------|-------|
| KALRDAKLDK | SQIHDIIVLVGGSTR      | HSP7C_HUMAN |             |             | Heat shock cognate 71                 | 0.09                            | 0.01                  | 47.40                | 1.98  |
| IGDAAKNQVA | MNPTNTVFDAGR         | HSP7C_HUMAN |             |             | Heat shock cognate 71                 | -0.04                           | 0.00                  | 29.50                | -1.86 |
| TIAGLNVLR  | INEPTAAAIAYGLDKKVGAE | HSP7C_HUMAN |             |             | kDa protein;<br>Heat shock cognate 71 | -0.43                           | 0.02                  | 32.90                | 3.27  |
| TTYSDNQPGV | LIQVYEGE             | HSP7C_HUMAN | HS71L_HUMAN | HSP71_HUMAN | kDa protein;<br>Heat shock cognate 71 | -2.24                           | 0.21                  | 36.00                | 2.98  |
| APAYSRALSR | QLSSGVSEIR           | HSPB1_HUMAN |             |             | Heat shock protein beta-1;            | 1.63                            | 0.20                  | 43.80                | 2.35  |
| AAPAYSRAL  | RQLSSGVSEIR          | HSPB1_HUMAN |             |             | Heat shock protein beta-1;            | -0.52                           | 0.05                  | 32.30                | 1.97  |
| EFRALLFVPR | RAPFDLFENR           | HS90A_HUMAN |             |             | Heat shock protein HSP 90-alpha;      | 3.26                            | 0.28                  | 21.30                | 2.86  |
| LIPEYLNFR  | GVVDSIDLPLNISR       | HS90A_HUMAN | H90B3_HUMAN | HS90B_HUMAN | Heat shock protein HSP 90-alpha;      | 2.60                            | 0.19                  | 75.50                | 2.72  |
| QKHIYYITGE | TKDQVANSFAVER        | HS90A_HUMAN |             |             | Heat shock protein HSP 90-alpha;      | 2.25                            | 0.17                  | 55.60                | 2.54  |
| WEDHLAVKHF | SVEGQLEFR            | HS90A_HUMAN | H90B3_HUMAN | HS902_HUMAN | Heat shock protein HSP 90-alpha;      | 0.48                            | 0.03                  | 37.30                | 1.18  |
| MGYMAAKKHL | EINPDHSIIETLR        | HS90A_HUMAN |             |             | Heat shock protein HSP 90-alpha;      | 0.15                            | 0.01                  | 35.30                | 2.48  |
| NSTMGYMAAK | KHLEINPDHSIIETLR     | HS90A_HUMAN |             |             | Heat shock protein HSP 90-alpha;      | 0.06                            | 0.00                  | 37.30                | 2.74  |
| RRIKEIVKKH | SQFIGYPITLFVEKER     | HS90A_HUMAN |             |             | Heat shock protein HSP 90-alpha;      | 0.02                            | 0.00                  | 48.90                | 4.84  |
| STMGYMAAKK | HLEINPDHSIIETLR      | HS90A_HUMAN |             |             | Heat shock protein HSP 90-alpha;      | -0.04                           | 0.00                  | 41.90                | 1.76  |
| VKDLVILLYE | TALLSSGFSLEDPQTHANR  | HS90A_HUMAN |             |             | Heat shock protein HSP 90-alpha;      | -0.19                           | 0.01                  | 52.90                | 2.94  |
| VILLYETALL | SSGFSLEDPQTHANR      | HS90A_HUMAN |             |             | Heat shock protein HSP 90-alpha;      | -0.32                           | 0.03                  | 33.50                | 0.00  |
| TMGYMAAKKH | LEINPDHSIIETLR       | HS90A_HUMAN |             |             | Heat shock protein HSP 90-alpha;      | -0.43                           | 0.02                  | 33.10                | 0.71  |
| GYMAAKKHLE | INPDHSIIETLR         | HS90A_HUMAN |             |             | Heat shock protein HSP 90-alpha;      | -0.46                           | 0.03                  | 32.50                | 3.74  |
| HNDDEQYAW  | SSAGGSFTVR           | HS90A_HUMAN | HS902_HUMAN | HS90B_HUMAN | Heat shock protein HSP 90-alpha;      | -0.46                           | 0.03                  | 36.10                | 8.02  |

Table S6

| Non-prime   | Prime                  | Id 1        | Id 2        | Id 3        | Protein (Id1)                                      | Fold-change (log <sub>2</sub> ) | Fc standard deviation | X! Tandem hyperscore | ppm   |
|-------------|------------------------|-------------|-------------|-------------|----------------------------------------------------|---------------------------------|-----------------------|----------------------|-------|
| KHNDDEQYAW  | ESSAGGSFTVR            | HS90A_HUMAN | HS902_HUMAN | HS90B_HUMAN | Heat shock protein HSP 90-alpha;                   | -1.04                           | 0.07                  | 32.80                | 4.06  |
| ALLFVPRRAP  | FDLFENR                | HS90A_HUMAN |             |             | Heat shock protein HSP 90-alpha;                   | -1.65                           | 0.10                  | 20.40                | 1.54  |
| ERRIKEIVKK  | HSQFIGYPITLFVEKER      | HS90A_HUMAN |             |             | Heat shock protein HSP 90-alpha;                   | -2.24                           | 0.11                  | 29.40                | 4.31  |
| RMKENQKHIY  | YITGETKDQVANSASFVER    | HS90A_HUMAN |             |             | Heat shock protein HSP                             | -3.46                           | 0.38                  | 54.60                | 2.10  |
| IMDSCDELIP  | EYLNFR                 | HS90A_HUMAN | HS904_HUMAN | HS90B_HUMAN | Heat shock protein HSP                             | -4.04                           | 0.00                  | 26.20                | 2.22  |
| TRMKENQKHI  | YYITGETKDQVANSASFVER   | HS90A_HUMAN |             |             | Heat shock protein HSP 90-alpha;                   | -4.47                           | 0.00                  | 33.50                | 3.58  |
| STMGYMMAKK  | HLEINPDHPIVETLR        | HS90B_HUMAN |             |             | Heat shock protein HSP 90-beta;                    | 0.28                            | 0.01                  | 50.80                | 1.98  |
| YVSRMKETQK  | SIYYITGESKEQVANSASFVER | HS90B_HUMAN |             |             | Heat shock protein HSP 90-beta;                    | -0.09                           | 0.01                  | 78.60                | 1.34  |
| FNDSQRQATK  | DAGTITGLNVLR           | HSP72_HUMAN |             |             | Heat shock-related 70 kDa protein 2;               | 1.74                            | 0.10                  | 40.00                | -2.70 |
| LSPADKTNVK  | AAWGKVG AHAGEYGAEALER  | HBA_HUMAN   |             |             | Hemoglobin subunit alpha;                          | 0.50                            | 0.04                  | 48.20                | 0.71  |
| KTNVKA AWGK | VGAHAGEYGAEALER        | HBA_HUMAN   |             |             | Hemoglobin subunit alpha;                          | -0.04                           | 0.00                  | 59.20                | 1.28  |
| QLSELHCDKL  | HVDPENFR               | HBB_HUMAN   | HBD_HUMAN   |             | Hemoglobin subunit beta;                           | -0.80                           | 0.07                  | 23.30                | -0.38 |
| VVAGSVCFML  | ILYQYAGPGLSLGAPGGR     | H6ST1_HUMAN |             |             | Heparan-sulfate 6-O-sulfotransferase 1;            | 0.54                            | 0.07                  | 41.40                | 4.34  |
| DEDDEDRGVM  | AVTAVTATAASDR          | HDGR2_HUMAN |             |             | Hepatoma-derived growth factor-related protein 2;  | -0.52                           | 0.08                  | 47.00                | 5.68  |
| IQGHRVEVKK  | AVPKEDIYSGGGGGSR       | ROA0_HUMAN  |             |             | Heterogeneous nuclear ribonucleoprotein A0;        | -0.02                           | 0.00                  | 50.20                | 6.14  |
| ESPKEPEQLR  | KLFIGGLSFETTDESLR      | RA1L2_HUMAN | ROA1_HUMAN  |             | Heterogeneous nuclear ribonucleoprotein A1-like    | 1.11                            | 0.02                  | 49.90                | 4.08  |
| PGAHVTVKKL  | FVGGIKEDTEEHHLR        | RA1L2_HUMAN | ROA1_HUMAN  | ROA2_HUMAN  | Heterogeneous nuclear ribonucleoprotein A1-like 2; | -0.52                           | 0.04                  | 27.00                | 2.99  |



Table S6

| Non-prime   | Prime                   | Id 1        | Id 2        | Id 3        | Protein (Id1)                                   | Fold-change (log <sub>2</sub> ) | Fc standard deviation | X! Tandem hyperscore | ppm   |
|-------------|-------------------------|-------------|-------------|-------------|-------------------------------------------------|---------------------------------|-----------------------|----------------------|-------|
| LRDYFEQYGK  | IEVIEIMTDR              | RA1L2_HUMAN | ROA1_HUMAN  |             | Heterogeneous nuclear ribonucleoprotein A1-like | -1.40                           | 0.15                  | 26.70                | 5.18  |
| HDPKEPEQLR  | KLFIGGLSFETDDSLR        | ROA3_HUMAN  |             |             | Heterogeneous nuclear ribonucleoprotein A3;     | 0.22                            | 0.01                  | 52.20                | 8.74  |
| GGLSWDTSKK  | DLTEYLSR                | HNRDL_HUMAN |             |             | Heterogeneous nuclear                           | 0.51                            | 0.04                  | 33.30                | -0.68 |
| EIQKEYFGAF  | GEIENIELPMDTKTNER       | HNRDL_HUMAN |             |             | Heterogeneous nuclear                           | -0.29                           | 0.02                  | 44.70                | 2.14  |
| AMKTKEPVKK  | IFVGGLSPDTPEEKIR        | HNRPD_HUMAN |             |             | Heterogeneous nuclear ribonucleoprotein D0;     | 0.61                            | 0.02                  | 52.70                | 3.99  |
| GPYDRPGTAR  | RYIGIVKQAGLER           | HNRPF_HUMAN |             |             | Heterogeneous nuclear ribonucleoprotein F;      | 0.28                            | 0.02                  | 43.30                | 3.18  |
| MGHRYVEVFK  | SNNVEMDWVLKHTGPNSPDTANL | HNRH1_HUMAN |             |             | Heterogeneous nuclear ribonucleoprotein H;      | 1.89                            | 0.16                  | 36.40                | 2.84  |
| CVHMRGLPYK  | ATENDIYNFFSPLNPVR       | HNRH1_HUMAN | HNRPF_HUMAN |             | Heterogeneous nuclear ribonucleoprotein H;      | 0.68                            | 0.12                  | 58.10                | 3.01  |
| NFFSPLNPVR  | VHIEIGPDGR              | HNRH1_HUMAN | HNRH2_HUMAN | HNRPF_HUMAN | Heterogeneous nuclear ribonucleoprotein H;      | 0.28                            | 0.02                  | 36.30                | 3.19  |
| TEGGEFVVK   | VRGLPWSCSADEVQR         | HNRH1_HUMAN |             |             | Heterogeneous nuclear ribonucleoprotein H;      | -0.16                           | 0.01                  | 62.30                | 2.00  |
| GGEGFVVKVR  | GLPWSCSADEVQR           | HNRH1_HUMAN |             |             | Heterogeneous nuclear                           | -0.19                           | 0.01                  | 48.10                | 5.02  |
| NSVEMDWVLK  | HTGPNSPDTANDGFVR        | HNRH1_HUMAN | HNRH2_HUMAN |             | Heterogeneous nuclear                           | -0.40                           | 0.04                  | 58.00                | 3.60  |
| VFKSNSVEMD  | WVLKHTGPNSPDTANDGFVR    | HNRH1_HUMAN | HNRH2_HUMAN |             | Heterogeneous nuclear                           | -1.52                           | 0.09                  | 52.30                | 4.58  |
| TWSPSEWQMA  | YEPQGGSGYDYSYAGGR       | HNRPK_HUMAN |             |             | Heterogeneous nuclear                           | 1.45                            | 0.13                  | 52.90                | 1.67  |
| VELRILLQSK  | NAGAVIGKGGKNIKALR       | HNRPK_HUMAN |             |             | Heterogeneous nuclear ribonucleoprotein K;      | 1.03                            | 0.08                  | 26.00                | 4.27  |
| RGGRGGSRAR  | NLPLPPPPPPR             | HNRPK_HUMAN |             |             | Heterogeneous nuclear                           | 1.00                            | 0.01                  | 33.40                | 3.25  |
| VKGAKIKELR  | ENTQTTIKLFQECCPHSTDR    | HNRPK_HUMAN |             |             | Heterogeneous nuclear ribonucleoprotein K;      | 0.51                            | 0.03                  | 44.70                | 1.03  |
| GNVEKVKFMK  | SKPGAAMVEMADGYAVDR      | HNRPL_HUMAN |             |             | Heterogeneous nuclear                           | 0.30                            | 0.01                  | 60.60                | 2.84  |
| LVKEKVG EVT | YVELLMDAEGKSR           | HNRPM_HUMAN |             |             | Heterogeneous nuclear                           | 0.51                            | 0.03                  | 36.30                | 6.07  |
| RGNFGGSFAG  | SFGGAGGHAPGVAR          | HNRPM_HUMAN |             |             | Heterogeneous nuclear ribonucleoprotein M;      | 0.06                            | 0.01                  | 36.50                | 1.65  |

Table S6

| Non-prime  | Prime                   | Id 1        | Id 2      | Id 3      | Protein (Id1)                                   | Fold-change (log <sub>2</sub> ) | Fc standard deviation | X! Tandem hyperscore | ppm   |
|------------|-------------------------|-------------|-----------|-----------|-------------------------------------------------|---------------------------------|-----------------------|----------------------|-------|
| DYYGYEDYYD | YYGYDYHNYR              | HNRPQ_HUMAN |           |           | Heterogeneous nuclear ribonucleoprotein Q;      | -1.00                           | 0.06                  | 26.10                | 3.31  |
| EFGKLERVKK | LKDYAFVHFEDR            | HNRPR_HUMAN |           |           | Heterogeneous nuclear                           | 0.30                            | 0.03                  | 39.40                | 3.38  |
| MKINEEISVK | HLPSTEPDPHVVR           | HNRL1_HUMAN |           |           | Heterogeneous nuclear ribonucleoprotein U-like  | 0.64                            | 0.02                  | 32.90                | 3.55  |
| AEPGGYSGPD | GHYAMDNITR              | HNRL1_HUMAN |           |           | Heterogeneous nuclear ribonucleoprotein U-like  | -2.58                           | 0.16                  | 24.60                | 3.13  |
| RGAAKEAAGK | SSGPTSLFAVTVAPPGAR      | HNRPU_HUMAN |           |           | Heterogeneous nuclear ribonucleoprotein U;      | 0.83                            | 0.02                  | 54.70                | 3.14  |
| GKSSGPTSLF | AVTVAPPGAR              | HNRPU_HUMAN |           |           | Heterogeneous nuclear                           | 0.56                            | 0.02                  | 28.20                | 4.55  |
| RKKREKEQFR | KLFIGGLSFETTEESLR       | ROA2_HUMAN  |           |           | Heterogeneous nuclear ribonucleoproteins A2/B1; | 0.83                            | 0.02                  | 46.90                | -0.55 |
| MEK        | TLETVPLER               | ROA2_HUMAN  |           |           | Heterogeneous nuclear ribonucleoproteins A2/B1; | 0.48                            | 0.04                  | 23.70                | -0.55 |
| LRDYFEEYGK | IDTIEITDR               | ROA2_HUMAN  |           |           | Heterogeneous nuclear ribonucleoproteins A2/B1; | 0.15                            | 0.01                  | 26.00                | 6.24  |
| TEEHHLRDYF | EEYGKIDTIEITDR          | ROA2_HUMAN  |           |           | Heterogeneous nuclear ribonucleoproteins A2/B1; | -0.21                           | 0.01                  | 37.00                | 1.73  |
| DTEEHHLRDY | FEEYGKIDTIEITDR         | ROA2_HUMAN  |           |           | Heterogeneous nuclear ribonucleoproteins A2/B1; | -0.49                           | 0.03                  | 38.50                | 1.85  |
| HLRDYFEEYG | KIDTIEITDR              | ROA2_HUMAN  |           |           | Heterogeneous nuclear                           | -0.65                           | 0.05                  | 37.40                | 2.16  |
| EHHLRDYFEE | YGKIDTIEITDR            | ROA2_HUMAN  |           |           | Heterogeneous nuclear                           | -0.88                           | 0.03                  | 51.70                | 0.62  |
| YYDRMYSYPA | RVPPPPPIAR              | HNRPC_HUMAN |           |           | Heterogeneous nuclear ribonucleoproteins C1/C2; | -1.80                           | 0.19                  | 37.50                | 4.08  |
| TGVRGGQVRG | AAGVTDGNEVAKAQQATPGGAAP | HINT2_HUMAN |           |           | Histidine triad nucleotide-                     | 0.31                            | 0.03                  | 92.60                | 6.78  |
| FTDVKRPGYR | VKEIGSTMSGR             | SAP18_HUMAN |           |           | Histone deacetylase complex subunit SAP18;      | 0.13                            | 0.01                  | 26.20                | -1.31 |
| VGMSLVALKK | ALAAAGYDVEKNNSR         | H11_HUMAN   | H12_HUMAN | H13_HUMAN | Histone H1.1;                                   | -0.07                           | 0.01                  | 42.10                | -1.15 |
| ARKSAGAAKR | KASGPPVSELITKAVAASKER   | H12_HUMAN   | H13_HUMAN | H14_HUMAN | Histone H1.2;                                   | 0.33                            | 0.01                  | 44.40                | 3.64  |

Table S6

| Non-prime   | Prime                 | Id 1        | Id 2        | Id 3        | Protein (Id1)                           | Fold-change (log <sub>2</sub> ) | Fc standard deviation | X! Tandem hyperscore | ppm   |
|-------------|-----------------------|-------------|-------------|-------------|-----------------------------------------|---------------------------------|-----------------------|----------------------|-------|
| RKSAGAAKRK  | ASGPPVSELITKAVAASKER  | H12_HUMAN   | H13_HUMAN   | H14_HUMAN   | Histone H1.2;                           | -1.04                           | 0.02                  | 52.00                | 1.80  |
| AAGAGAAKRK  | ATGPPVSELITKAVAASKER  | H15_HUMAN   |             |             | Histone H1.5;                           | 0.18                            | 0.00                  | 37.00                | 2.30  |
| RNGLSLAALK  | KALAAGGYDVEKNNSR      | H15_HUMAN   |             |             | Histone H1.5;                           | 0.00                            | 0.00                  | 30.30                | 3.00  |
| KAAGAGAAKR  | KATGPPVSELITKAVAASKER | H15_HUMAN   |             |             | Histone H1.5;                           | -0.21                           | 0.01                  | 29.50                | 4.23  |
| YMAAVLEYLT  | AEILELAGNAAR          | H2A1B_HUMAN | H2A1C_HUMAN | H2A1D_HUMAN | Histone H2A type 1-B/E;                 | -1.72                           | 0.23                  | 47.90                | 4.51  |
| ISSKAMGIMN  | SFVNDIFER             | H2B1B_HUMAN | H2B1C_HUMAN | H2B1D_HUMAN | Histone H2B type 1-B;                   | -0.19                           | 0.01                  | 33.10                | 5.60  |
| RLARRGGVKR  | ISGLIYEETR            | H4_HUMAN    |             |             | Histone H4;                             | 2.40                            | 0.13                  | 40.20                | 1.82  |
| SRPGRGEPFR  | IAVGYVDDTQFVR         | 1A01_HUMAN  | 1A02_HUMAN  | 1A03_HUMAN  | HLA class I                             | 1.13                            | 0.07                  | 62.90                | 2.84  |
| SRPGAGEPRF  | ISVGYVDDTQFVR         | 1B07_HUMAN  | 1B08_HUMAN  | 1B14_HUMAN  | HLA class I                             | 1.52                            | 0.12                  | 47.30                | 5.28  |
| RPGAGEPRFI  | SVGYYVDDTQFVR         | 1B07_HUMAN  | 1B08_HUMAN  | 1B14_HUMAN  | HLA class I<br>histocompatibility       | 1.48                            | 0.09                  | 72.30                | -0.77 |
| AGEPRFISVG  | YVDDTQFVR             | 1B07_HUMAN  | 1A01_HUMAN  | 1A02_HUMAN  | HLA class I                             | 0.11                            | 0.01                  | 32.40                | 1.44  |
| PGAGEPRFIS  | VGYYVDDTQFVR          | 1B07_HUMAN  | 1A01_HUMAN  | 1A02_HUMAN  | HLA class I<br>histocompatibility       | -0.07                           | 0.00                  | 35.60                | 3.07  |
| SVGYYVDDTQF | VRFSDAASPR            | 1C06_HUMAN  | 1B07_HUMAN  | 1B08_HUMAN  | HLA class I<br>histocompatibility       | 0.37                            | 0.02                  | 37.70                | 5.52  |
| DYIALNEDLR  | SWTAADTAAQITQR        | 1C07_HUMAN  | 1B07_HUMAN  | 1B08_HUMAN  | HLA class I<br>histocompatibility       | 0.71                            | 0.09                  | 63.30                | -1.29 |
| GDGTFQKWAA  | VVVPSGQEQR            | 1C07_HUMAN  | 1A02_HUMAN  | 1A25_HUMAN  | antigen, Cw-7 alpha<br>HLA class I      | 0.02                            | 0.00                  | 30.90                | 7.18  |
| LLMLGMGCWA  | REVLVPEGPLYR          | IGSF8_HUMAN |             |             | Immunoglobulin<br>superfamily member 8; | -0.43                           | 0.02                  | 37.10                | 1.50  |
| EAAMFDSLML  | DSYVSSTTGESVITR       | IMA7_HUMAN  |             |             | Importin subunit alpha-7;               | -0.14                           | 0.01                  | 68.30                | 1.71  |
| LPTFLVELSR  | VLANPGNSQVAR          | IMB1_HUMAN  |             |             | Importin subunit beta-1;                | 3.31                            | 0.35                  | 48.10                | 7.01  |
| LLPLLGGTQT  | AIVFIKQPSSQDALQGR     | PTK7_HUMAN  |             |             | Inactive tyrosine-protein<br>kinase 7;  | 0.00                            | 0.00                  | 70.00                | 1.82  |
| ANEILQRSKK  | GKLPIVNEDDELVAIIAR    | IMDH2_HUMAN |             |             | Inosine-5'-monophosphate                | 1.01                            | 0.04                  | 49.80                | 2.52  |

Table S6

| Non-prime  | Prime                    | Id 1        | Id 2 | Id 3 | Protein (Id1)                                 | Fold-change (log <sub>2</sub> ) | Fc standard deviation | X! Tandem hyperscore | ppm   |
|------------|--------------------------|-------------|------|------|-----------------------------------------------|---------------------------------|-----------------------|----------------------|-------|
| LTVQVGVTAG | APWQCAPCSAEKLALCPPVSASCS | IBP1_HUMAN  |      |      | Insulin-like growth factor-binding protein 1; | 0.18                            | 0.00                  | 54.20                | 4.73  |
| FRCPPCTPER | LAACGPPPVAPPAVAAVAGGAR   | IBP2_HUMAN  |      |      | Insulin-like growth factor-                   | 6.58                            | 0.72                  | 47.90                | 7.82  |
| PKKLRPPPAR | TPCQQELDQVLER            | IBP2_HUMAN  |      |      | Insulin-like growth factor-                   | 2.80                            | 0.28                  | 55.30                | 3.71  |
| GGGGARAEVL | FRCPPCTPER               | IBP2_HUMAN  |      |      | Insulin-like growth factor-binding protein 2; | 2.47                            | 0.12                  | 30.90                | 2.22  |
| GGGAGRKPLK | SGMKELAVFR               | IBP2_HUMAN  |      |      | Insulin-like growth factor-binding protein 2; | 0.92                            | 0.06                  | 20.70                | 2.90  |
| LLRGPPVARA | GASSAGLGPVVR             | IBP3_HUMAN  |      |      | Insulin-like growth factor-binding protein 3; | 3.60                            | 0.30                  | 55.50                | 1.82  |
| LRGPPVARAG | ASSAGLGPVVR              | IBP3_HUMAN  |      |      | Insulin-like growth factor-binding protein 3; | 3.53                            | 0.32                  | 43.40                | -0.48 |
| PPCSEEKLAR | CRPPVGCCELVR             | IBP4_HUMAN  |      |      | Insulin-like growth factor-binding protein 4; | 1.03                            | 0.06                  | 49.40                | 1.60  |
| LAAGPGPSLG | DEAIHCPPCSEEKLAR         | IBP4_HUMAN  |      |      | Insulin-like growth factor-                   | 0.48                            | 0.03                  | 45.80                | -0.35 |
| QDTEMGPCRR | HLDSVLQQLQTEVYR          | IBP6_HUMAN  |      |      | Insulin-like growth factor-binding protein 6; | 3.62                            | 0.13                  | 58.30                | 2.04  |
| EMGPCRRHLD | SVLQQLQTEVYR             | IBP6_HUMAN  |      |      | Insulin-like growth factor-                   | 2.61                            | 0.20                  | 67.30                | 1.60  |
| LQQLQTEVYR | GAQTLYVPNCDHR            | IBP6_HUMAN  |      |      | Insulin-like growth factor-binding protein 6; | 2.34                            | 0.16                  | 37.50                | -1.03 |
| LAASPGGALA | RCPGCGQGVQAGCPGGCVEEEDG  | IBP6_HUMAN  |      |      | Insulin-like growth factor-                   | 2.25                            | 0.21                  | 69.10                | 5.68  |
| LAASPGGALA | RCPGCGQGVQAGCPGGCVEEEDG  | IBP6_HUMAN  |      |      | Insulin-like growth factor-binding protein 6; | 2.24                            | 0.14                  | 81.60                | 9.65  |
| RETIKGIQKR | EASNCFAIR                | ITM2B_HUMAN |      |      | Integral membrane protein                     | 0.46                            | 0.04                  | 43.60                | 1.63  |
| ETIKGIQKRE | ASNCFAIR                 | ITM2B_HUMAN |      |      | Integral membrane protein                     | -1.72                           | 0.11                  | 26.10                | 1.45  |
| QGQRIGHFEF | HGDHALLCVR               | GP180_HUMAN |      |      | Integral membrane protein                     | -2.05                           | 0.17                  | 27.80                | 4.45  |
| GGGQGPPVPT | LAAAKKAKSETVLTCATGR      | ITA3_HUMAN  |      |      | Integrin alpha-3;                             | 1.26                            | 0.11                  | 32.90                | 1.72  |
| GQGPPVTLA  | AAKKAKSETVLTCATGR        | ITA3_HUMAN  |      |      | Integrin alpha-3;                             | 0.46                            | 0.02                  | 32.80                | 3.88  |
| PFLVDGLTLG | AQHLEAGGSLTR             | ITB4_HUMAN  |      |      | Integrin beta-4;                              | 0.63                            | 0.05                  | 41.00                | 1.25  |
| LDRSFTSQML | SSQPPPHGDLGAPQNPNAKAAGSF | ITB4_HUMAN  |      |      | Integrin beta-4;                              | 0.53                            | 0.02                  | 63.30                | 3.01  |

Table S6

| Non-prime  | Prime                   | Id 1        | Id 2        | Id 3 | Protein (Id1)                           | Fold-change (log <sub>2</sub> ) | Fc standard deviation | X! Tandem hyperscore | ppm   |
|------------|-------------------------|-------------|-------------|------|-----------------------------------------|---------------------------------|-----------------------|----------------------|-------|
| RSFTSQMLSS | QPPPHGDLGAPQNPNAKAAGSR  | ITB4_HUMAN  |             |      | Integrin beta-4;                        | -0.09                           | 0.01                  | 68.40                | 4.13  |
| DRSFTSQMLS | SQPPPHGDLGAPQNPNAKAAGSR | ITB4_HUMAN  |             |      | Integrin beta-4;                        | -0.21                           | 0.01                  | 52.30                | 0.81  |
| IVDTVLMAPR | SAKPALLKLTEKQVEQR       | ITB4_HUMAN  |             |      | Integrin beta-4;                        | -0.26                           | 0.01                  | 22.50                | 1.59  |
| VEQRAFHDLK | VAPGYTTLTADQDAR         | ITB4_HUMAN  |             |      | Integrin beta-4;                        | -0.65                           | 0.06                  | 64.30                | 6.17  |
| EPVHPASLPD | SSLATSAPLCCTLCHER       | I2BP2_HUMAN |             |      | Interferon regulatory                   | -0.24                           | 0.01                  | 36.10                | 3.55  |
| EPCPQPLRSP | SLDNPTFPNLPSENPLKR      | IRF3_HUMAN  |             |      | Interferon regulatory factor 3;         | 1.94                            | 0.06                  | 30.90                | 2.39  |
| PSDKVLIQEK | TQLKGSELEITLTR          | SYIC_HUMAN  |             |      | Isoleucine--tRNA ligase, Isovaleryl-CoA | 1.25                            | 0.09                  | 46.00                | 3.13  |
| PLAGFVSQRA | HSLLPVDDAINGLSEEQR      | IVD_HUMAN   |             |      | dehydrogenase, mitochondrial;           | -0.37                           | 0.02                  | 64.30                | 4.34  |
| VMAEAPPGVE | TDLIDVGFTDDVKKGGPGR     | IST1_HUMAN  |             |      | IST1 homolog;                           | 0.92                            | 0.05                  | 53.50                | 3.76  |
| AILLCSLALG | SVTVHSSEPEVR            | JAM1_HUMAN  |             |      | Junctional adhesion molecule A;         | -0.76                           | 0.04                  | 25.70                | 4.62  |
| QLRLALLVAA | GAPEVLVSAPR             | KDEL2_HUMAN |             |      | KDEL motif-containing protein 2;        | 0.15                            | 0.01                  | 49.10                | 3.89  |
| GGGVSSLRI  | SSSKGSLGGFSSGGFSGGSFSR  | K1C10_HUMAN |             |      | Keratin, type I                         | 1.78                            | 0.17                  | 74.60                | -1.25 |
| GYGSSFGGVD | GLLAGGEKATMQNLNDR       | K1C17_HUMAN |             |      | Keratin, type I cytoskeletal 17;        | -1.14                           | 0.10                  | 59.80                | 1.94  |
| HYFKIIEDLR | AQIFANTVDNAR            | K1C18_HUMAN |             |      | Keratin, type I cytoskeletal 18;        | 4.33                            | 0.51                  | 51.20                | 2.82  |
| ILGATIENSR | IVLQIDNAR               | K1C18_HUMAN | K1C19_HUMAN |      | Keratin, type I cytoskeletal 18;        | 2.71                            | 0.18                  | 32.60                | 0.56  |
| MQTIQKTTTR | RIVDGKVVSETNDTKVLR      | K1C18_HUMAN |             |      | Keratin, type I cytoskeletal 18;        | 0.75                            | 0.07                  | 34.00                | 0.98  |
| LGSVQAPSYG | ARPVSSAASVYAGAGGSGSR    | K1C18_HUMAN |             |      | Keratin, type I cytoskeletal 18;        | 0.70                            | 0.06                  | 83.90                | 2.23  |
| TFSTNYRSLG | SVQAPSYGARPVSSAASVYAGAG | K1C18_HUMAN |             |      | Keratin, type I                         | 0.67                            | 0.06                  | 71.80                | 2.70  |

Table S6

| Non-prime  | Prime                  | Id 1        | Id 2 | Id 3 | Protein (Id1)                    | Fold-change (log <sub>2</sub> ) | Fc standard deviation | X! Tandem hyperscore | ppm   |
|------------|------------------------|-------------|------|------|----------------------------------|---------------------------------|-----------------------|----------------------|-------|
| STTVTTQSA  | EVGAAETTLTEL           | K1C18_HUMAN |      |      | Keratin, type I cytoskeletal 18; | 0.64                            | 0.06                  | 64.30                | 3.51  |
| SLGSVQAPSY | GARPVSSAASVYAGAGGSGSR  | K1C18_HUMAN |      |      | Keratin, type I cytoskeletal 18; | 0.37                            | 0.03                  | 100.40               | 2.05  |
| VQAPSYGARP | VSSAASVYAGAGGSGSR      | K1C18_HUMAN |      |      | Keratin, type I cytoskeletal 18; | 0.35                            | 0.04                  | 99.00                | 5.49  |
| TRSTFSTNYR | SLGSVQAPSYGAR          | K1C18_HUMAN |      |      | Keratin, type I                  | 0.28                            | 0.06                  | 63.70                | 3.18  |
| GSVQAPSYGA | RPVSSAASVYAGAGGSGSR    | K1C18_HUMAN |      |      | Keratin, type I cytoskeletal 18; | 0.06                            | 0.01                  | 49.50                | 3.78  |
| APSYGARPV  | SAASVYAGAGGSGSR        | K1C18_HUMAN |      |      | Keratin, type I                  | -0.21                           | 0.01                  | 85.10                | 4.50  |
| IEESTTVVTT | QSAEVGAAETTLTEL        | K1C18_HUMAN |      |      | Keratin, type I cytoskeletal 18; | -0.24                           | 0.02                  | 84.80                | 4.79  |
| QIEESTTVVT | TQSAEVGAAETTLTELRR     | K1C18_HUMAN |      |      | Keratin, type I cytoskeletal 18; | -0.24                           | 0.02                  | 38.20                | 0.36  |
| IEESTTVVTT | QSAEVGAAETTLTELRR      | K1C18_HUMAN |      |      | Keratin, type I cytoskeletal 18; | -0.29                           | 0.02                  | 28.20                | 0.59  |
| QAPSYGARPV | SSAASVYAGAGGSGSR       | K1C18_HUMAN |      |      | Keratin, type I cytoskeletal 18; | -0.32                           | 0.02                  | 80.30                | 1.13  |
| SVENDIHGLR | KVIDDTNITR             | K1C18_HUMAN |      |      | Keratin, type I                  | -0.37                           | 0.06                  | 18.90                | 5.15  |
| TTVVTTQSAE | VGAAETTLTEL            | K1C18_HUMAN |      |      | Keratin, type I cytoskeletal 18; | -0.40                           | 0.04                  | 34.10                | 5.56  |
| TGIAGGLAGM | GGIQNEKETMQLNDR        | K1C18_HUMAN |      |      | Keratin, type I cytoskeletal 18; | -0.49                           | 0.04                  | 49.70                | 5.87  |
| LATGIAGGLA | GMGGIQNEKETMQLNDR      | K1C18_HUMAN |      |      | Keratin, type I cytoskeletal 18; | -0.52                           | 0.03                  | 44.30                | 3.71  |
| EESTTVVTTQ | SAEVGAAETTLTELRR       | K1C18_HUMAN |      |      | Keratin, type I cytoskeletal 18; | -0.80                           | 0.06                  | 34.90                | 1.61  |
| EESTTVVTTQ | SAEVGAAETTLTEL         | K1C18_HUMAN |      |      | Keratin, type I cytoskeletal 18; | -0.80                           | 0.07                  | 81.00                | 3.73  |
| QIEESTTVVT | TQSAEVGAAETTLTEL       | K1C18_HUMAN |      |      | Keratin, type I                  | -0.80                           | 0.08                  | 84.90                | 4.42  |
| ESTTVVTTQS | AEVGAAETTLTEL          | K1C18_HUMAN |      |      | Keratin, type I                  | -0.88                           | 0.08                  | 81.60                | 3.21  |
| GMGSGGLATG | IAGGLAGMGGIQNEKETMQLND | K1C18_HUMAN |      |      | Keratin, type I                  | -1.00                           | 0.08                  | 51.00                | -0.35 |

Table S6

| Non-prime  | Prime                    | Id 1        | Id 2 | Id 3 | Protein (Id1)                        | Fold-change (log <sub>2</sub> ) | Fc standard deviation | X! Tandem hyperscore | ppm   |
|------------|--------------------------|-------------|------|------|--------------------------------------|---------------------------------|-----------------------|----------------------|-------|
| DLAKIMADIR | AQYDELAR                 | K1C18_HUMAN |      |      | Keratin, type I                      | -1.14                           | 0.05                  | 29.90                | 2.70  |
| VVTTQSAEVG | AAETTLTELRL              | K1C18_HUMAN |      |      | Keratin, type I                      | -1.19                           | 0.11                  | 43.80                | 2.81  |
| YWSQQIEEST | TVVTTQSAEVGAAETTLTELRL   | K1C18_HUMAN |      |      | Keratin, type I                      | -1.19                           | 0.11                  | 79.90                | 2.35  |
| NEKETMQSLN | DRLASYLDR                | K1C18_HUMAN |      |      | Keratin, type I                      | -1.34                           | 0.07                  | 35.70                | 2.18  |
| YWSQQIEEST | TVVTTQSAEVGAAETTLTELRR   | K1C18_HUMAN |      |      | Keratin, type I<br>cytoskeletal 18;  | -1.34                           | 0.10                  | 25.00                | 5.40  |
| GIAGGLAGMG | GIQNEKETMQSLNDR          | K1C18_HUMAN |      |      | Keratin, type I<br>cytoskeletal 18;  | -1.52                           | 0.13                  | 36.50                | 0.00  |
| SGLTVEVDAP | KSQDLAKIMADIR            | K1C18_HUMAN |      |      | Keratin, type I                      | -1.65                           | 0.05                  | 38.30                | 4.51  |
| RGGMGSGGLA | TGIAGGLAGMGGIQNEKETMQSLN | K1C18_HUMAN |      |      | Keratin, type I<br>cytoskeletal 18;  | -1.72                           | 0.11                  | 72.40                | 3.09  |
| GYGGVLTASD | GLLAGNEKLTMQNLNDR        | K1C19_HUMAN |      |      | Keratin, type I<br>cytoskeletal 19;  | 3.32                            | 0.25                  | 33.10                | 3.70  |
| INQSLLAPLR | LDADPSLQR                | K2C7_HUMAN  |      |      | Keratin, type II<br>cytoskeletal 7;  | -1.80                           | 0.13                  | 23.70                | -1.72 |
| AQEREQIKVL | NDKFASFIDKVR             | K2C74_HUMAN |      |      | Keratin, type II<br>cytoskeletal 74; | 3.85                            | 0.21                  | 29.40                | 3.04  |
| YMNKVELESR | LEGLTDEINFLR             | K2C8_HUMAN  |      |      | Keratin, type II                     | 4.27                            | 0.32                  | 66.70                | 4.90  |
| NKVELESRL  | GLTDEINFLR               | K2C8_HUMAN  |      |      | Keratin, type II                     | 2.32                            | 0.14                  | 39.80                | 4.37  |
| AEIEGLKGQR | ASLEAAIADAEQR            | K2C8_HUMAN  |      |      | Keratin, type II<br>cytoskeletal 8;  | 0.74                            | 0.06                  | 59.40                | -1.23 |
| ISEMNRNISR | LQAEIEGLKGQR             | K2C8_HUMAN  |      |      | Keratin, type II                     | 0.51                            | 0.03                  | 22.20                | 2.86  |
| TAVTVNQSL  | SPLVLEVDPNIQAVR          | K2C8_HUMAN  |      |      | Keratin, type II<br>cytoskeletal 8;  | 0.22                            | 0.01                  | 75.90                | 3.75  |
| SSFSRTSSSR | AVVVKKIETR               | K2C8_HUMAN  |      |      | Keratin, type II                     | 0.11                            | 0.01                  | 51.80                | 3.01  |
| ITAVTVNQSL | LSPLVLEVDPNIQAVR         | K2C8_HUMAN  |      |      | Keratin, type II                     | 0.09                            | 0.01                  | 84.80                | 5.23  |
| YGGLTSPGLS | YSLGSSFGSGAGSSSFSR       | K2C8_HUMAN  |      |      | Keratin, type II                     | -0.04                           | 0.00                  | 103.20               | 3.55  |
| TSPGLSYSLG | SSFSGAGSSSFSR            | K2C8_HUMAN  |      |      | Keratin, type II<br>cytoskeletal 8;  | -0.19                           | 0.01                  | 80.90                | 0.30  |
| SPGLSYSLGS | SFGSGAGSSSFSR            | K2C8_HUMAN  |      |      | Keratin, type II<br>cytoskeletal 8;  | -0.46                           | 0.04                  | 39.80                | -3.94 |
| VNQSLLSPLV | LEVDPNIQAVR              | K2C8_HUMAN  |      |      | Keratin, type II<br>cytoskeletal 8;  | -0.49                           | 0.06                  | 37.00                | 4.03  |

Table S6

| Non-prime  | Prime                  | Id 1        | Id 2        | Id 3       | Protein (Id1)                             | Fold-change (log <sub>2</sub> ) | Fc standard deviation | X! Tandem hyperscore | ppm   |
|------------|------------------------|-------------|-------------|------------|-------------------------------------------|---------------------------------|-----------------------|----------------------|-------|
| PGLSYSLGSS | FGSGAGSSSF             | K2C8_HUMAN  |             |            | Keratin, type II cytoskeletal 8;          | -0.58                           | 0.06                  | 29.20                | 1.61  |
| VTVNQSLSP  | LVLEVDPNQAVR           | K2C8_HUMAN  |             |            | Keratin, type II                          | -0.58                           | 0.05                  | 48.60                | 10.13 |
| FLEQQNKMLE | TKWSLLQQQTAR           | K2C8_HUMAN  |             |            | Keratin, type II cytoskeletal 8;          | -0.65                           | 0.05                  | 26.10                | 2.60  |
| QSLLSPLVLE | VDPNIQAVR              | K2C8_HUMAN  |             |            | Keratin, type II cytoskeletal 8;          | -1.00                           | 0.10                  | 30.90                | 1.82  |
| TVNQSLSP   | VLEVDPNQAVR            | K2C8_HUMAN  |             |            | Keratin, type II                          | -1.00                           | 0.10                  | 47.50                | 6.08  |
| GGLTSPGLSY | SLGSSFGSGAGSSSF        | K2C8_HUMAN  |             |            | Keratin, type II                          | -1.14                           | 0.08                  | 89.00                | 4.98  |
| AARMSRSSGR | SGSMDPSGAHPSVR         | KHDR1_HUMAN |             |            | KH domain-containing,                     | -1.40                           | 0.07                  | 28.80                | 2.89  |
| RQNEELNLLK | AQLNETLTKLR            | KTN1_HUMAN  |             |            | Kinectin;                                 | 0.20                            | 0.02                  | 20.60                | 2.43  |
| SCYLKQGKFK | QAETLYKEILTR           | KLC1_HUMAN  |             |            | Kinesin light chain 1;                    | 2.54                            | 0.15                  | 30.60                | 1.38  |
| KILDTSVAYV | RGEENLAGWRPR           | KIF1A_HUMAN | KIF1B_HUMAN |            | Kinesin-like protein KIF1A;               | 4.32                            | 0.41                  | 27.50                | 9.72  |
| WKISGLPVTR | VIGSGCNLDSAR           | LDH6A_HUMAN | LDHA_HUMAN  | LDHB_HUMAN | L-lactate dehydrogenase                   | 4.66                            | 0.41                  | 55.50                | -1.33 |
| IGPSKERTLS | ADASVNTLPVVVSR         | LAR4B_HUMAN |             |            | La-related protein 4B;                    | 0.40                            | 0.04                  | 55.10                | 5.95  |
| LLCAPSLLVA | LDICKNPNCHNGGLCEEISQEV | MFGM_HUMAN  |             |            | Lactadherin;                              | 2.32                            | 0.15                  | 55.30                | 3.66  |
| VRGRELTGLK | ALYETELADAR            | LMNB1_HUMAN |             |            | Lamin-B1;                                 | -0.04                           | 0.00                  | 46.30                | 5.36  |
| VIESTPIAE  | TIMASSNESLVVNR         | LAP2B_HUMAN |             |            | Lamina-associated polypeptide 2, isoforms | 2.06                            | 0.15                  | 67.80                | -0.26 |
| NRVTGNFKHA | SPILPITEFSDIPR         | LAP2B_HUMAN |             |            | Lamina-associated polypeptide 2, isoforms | 1.08                            | 0.08                  | 54.90                | 7.62  |
| VNRVTGNFKH | ASPILPITEFSDIPR        | LAP2B_HUMAN |             |            | Lamina-associated polypeptide 2, isoforms | 0.66                            | 0.07                  | 35.40                | 1.42  |
| VAYVLIKFAN | SPRPDLWVLER            | LAMA3_HUMAN | LAMA5_HUMAN |            | Laminin subunit alpha-3;                  | 1.55                            | 0.06                  | 24.30                | 3.93  |
| ERLLWEMRAR | DLGAPQAAAEELAAAQR      | LAMA5_HUMAN |             |            | Laminin subunit alpha-5;                  | 5.54                            | 0.67                  | 58.60                | 1.63  |
| VVEYANEDAR | QEVGVAVHTPQR           | LAMA5_HUMAN |             |            | Laminin subunit alpha-5;                  | 4.41                            | 0.28                  | 26.30                | 2.59  |



Table S6

| Non-prime  | Prime                   | Id 1        | Id 2 | Id 3 | Protein (Id1)                                         | Fold-change (log <sub>2</sub> ) | Fc standard deviation | X! Tandem hyperscore | ppm   |
|------------|-------------------------|-------------|------|------|-------------------------------------------------------|---------------------------------|-----------------------|----------------------|-------|
| SMHVLPRSSR | GLLLFTAR                | LAMA5_HUMAN |      |      | Laminin subunit alpha-5;                              | 2.59                            | 0.31                  | 30.90                | -1.30 |
| GLALLGAARA | REEAGGGFSLHPPYFNLAEGAR  | LAMA5_HUMAN |      |      | Laminin subunit alpha-5;                              | 1.51                            | 0.01                  | 48.80                | 3.45  |
| FGKTWRVYQY | LAADCTSTFPR             | LAMB3_HUMAN |      |      | Laminin subunit beta-3;                               | -6.06                           | 0.00                  | 11.80                | 9.11  |
| FLPNTEGFSR | AALPFGLVR               | LPHN2_HUMAN |      |      | Latrophilin-2;                                        | 1.90                            | 0.08                  | 30.10                | 2.45  |
| DVYQGVPKDY | TGEDVTPQNFLAVLR         | LGMN_HUMAN  |      |      | Legumain;                                             | 1.33                            | 0.18                  | 50.40                | 4.26  |
| LKSTGDGTLG | RASEVEVKNEIVANVGKR      | LRRF1_HUMAN |      |      | Leucine-rich repeat flightless-interacting protein 1; | 0.09                            | 0.01                  | 31.60                | 6.85  |
| KGSRNMPGLS | AATLASLGGTSSR           | LRRF1_HUMAN |      |      | Leucine-rich repeat flightless-interacting protein 1; | -0.40                           | 0.04                  | 63.20                | 1.23  |
| YLRSCRAHSV | VPISCFLR                | YV012_HUMAN |      |      | Leucine-rich repeat-                                  | 2.18                            | 0.15                  | 32.20                | -5.88 |
| VKPKTLPLDK | SINHQIESPSER            | LIMC1_HUMAN |      |      | LIM and calponin                                      | -1.14                           | 0.05                  | 27.10                | 3.77  |
| QPVAQSYGGY | KEPAAPVSIQR             | LASP1_HUMAN |      |      | LIM and SH3 domain                                    | 0.79                            | 0.07                  | 29.70                | 3.79  |
| MVADTPENLR | LKQQSELQSQVR            | LASP1_HUMAN |      |      | LIM and SH3 domain                                    | 0.45                            | 0.04                  | 29.70                | 7.59  |
| SAPVYQQPQQ | QPVAQSYGGYKEPAAPVSIQR   | LASP1_HUMAN |      |      | LIM and SH3 domain protein 1;                         | 0.35                            | 0.03                  | 21.10                | 1.51  |
| QQPQQPVAQ  | SYGGYKEPAAPVSIQR        | LASP1_HUMAN |      |      | LIM and SH3 domain protein 1;                         | 0.22                            | 0.02                  | 30.40                | 3.63  |
| PQQQPVAQSY | GGYKEPAAPVSIQR          | LASP1_HUMAN |      |      | LIM and SH3 domain protein 1;                         | 0.00                            | 0.00                  | 32.30                | 0.84  |
| LCGCPAAAA  | SPLLLFANR               | LRP5_HUMAN  |      |      | Low-density lipoprotein receptor-related protein 5;   | 1.34                            | 0.06                  | 43.30                | 1.13  |
| LLQLQHAAAA | AADPLLGGQGPAKDCEKDQFQCR | LRP8_HUMAN  |      |      | Low-density lipoprotein                               | 0.17                            | 0.01                  | 32.40                | 0.15  |
| LLLQLQHAAA | AAADPLLGGQGPAKDCEKDQFQC | LRP8_HUMAN  |      |      | Low-density lipoprotein receptor-related protein 8;   | 0.02                            | 0.00                  | 35.90                | 2.37  |
| M          | DGLQASAGPLR             | NO66_HUMAN  |      |      | Lysine-specific demethylase NO66;                     | 3.80                            | 0.15                  | 21.90                | 0.45  |

Table S6

| Non-prime  | Prime                    | Id 1        | Id 2 | Id 3 | Protein (Id1)                             | Fold-change (log <sub>2</sub> ) | Fc standard deviation | X! Tandem hyperscore | ppm   |
|------------|--------------------------|-------------|------|------|-------------------------------------------|---------------------------------|-----------------------|----------------------|-------|
| SLATAALLGH | ILLHDFLLVPR              | LYAG_HUMAN  |      |      | Lysosomal alpha-glucosidase;              | 1.69                            | 0.03                  | 44.50                | 4.15  |
| ATAALLGHIL | LHDFLLVPR                | LYAG_HUMAN  |      |      | Lysosomal alpha-glucosidase;              | 1.43                            | 0.07                  | 26.00                | -0.09 |
| TAALLGHILL | HDFLLVPR                 | LYAG_HUMAN  |      |      | Lysosomal alpha-                          | 1.22                            | 0.06                  | 29.90                | 6.69  |
| LLHDFLLVPR | ELSGSSPVLEETHPAHQGASRPGI | LYAG_HUMAN  |      |      | Lysosomal alpha-                          | 0.48                            | 0.02                  | 44.90                | 1.41  |
| APQPIPRRSW | SPALTIENEHIR             | MA2B1_HUMAN |      |      | Lysosomal alpha-mannosidase;              | -0.24                           | 0.02                  | 29.70                | 0.71  |
| PTPHQTPYQL | DPANITLEPMEIR            | MA2B1_HUMAN |      |      | Lysosomal alpha-                          | -0.88                           | 0.05                  | 40.30                | 3.85  |
| VPSHFRYEKD | TVVVQDLGNIFTR            | PPGB_HUMAN  |      |      | Lysosomal protective protein;             | 1.50                            | 0.17                  | 67.50                | 4.36  |
| SPDGPSRFRK | AYKPEQPLVR               | LOXL2_HUMAN |      |      | Lysyl oxidase homolog 2;                  | -0.46                           | 0.03                  | 25.20                | 0.31  |
| VCLLASRSIT | EEVSEYCSHMIGSGHLQSLQR    | CSF1_HUMAN  |      |      | Macrophage colony-stimulating factor 1;   | 1.31                            | 0.11                  | 41.50                | 1.86  |
| IGKIGGAQNR | SYSKLLCGLLAER            | MIF_HUMAN   |      |      | Macrophage migration inhibitory factor;   | 2.58                            | 0.05                  | 42.00                | 3.19  |
| MAFGGSSEPC | ALCSLHSIGKIGGAQNR        | MIF_HUMAN   |      |      | Macrophage migration inhibitory factor;   | 0.67                            | 0.03                  | 30.40                | 4.75  |
| VPDQLMAFGG | SSEPCALCSLHSIGKIGGAQNR   | MIF_HUMAN   |      |      | Macrophage migration inhibitory factor;   | -0.02                           | 0.00                  | 34.60                | 0.08  |
| KIGGAQNRSY | SKLLCGLLAER              | MIF_HUMAN   |      |      | Macrophage migration inhibitory factor;   | -0.19                           | 0.01                  | 37.00                | -1.88 |
| GGSEPCALC  | SLHSIGKIGGAQNR           | MIF_HUMAN   |      |      | Macrophage migration                      | -0.49                           | 0.04                  | 23.80                | 4.28  |
| YMLGSAMSRP | IIHFGSDYEDR              | PRIO_HUMAN  |      |      | Major prion protein;                      | -0.72                           | 0.06                  | 48.00                | 6.56  |
| DPLADRGEKD | TAKSLQPLAPR              | MVP_HUMAN   |      |      | Major vault protein;                      | 0.71                            | 0.04                  | 28.40                | 3.36  |
| QPSRHMSTMR | SAQILASALAEMQR           | MMP15_HUMAN |      |      | Matrix metalloproteinase-15;              | 1.36                            | 0.09                  | 30.60                | 3.61  |
| PPPLPRLKRR | DFTPAELR                 | PGRC1_HUMAN |      |      | Membrane-associated progesterone receptor | 1.31                            | 0.07                  | 29.60                | 4.88  |
| GSLLEADVR  | ALGGLACDLPGR             | MSLN_HUMAN  |      |      | Mesothelin;                               | 5.74                            | 0.42                  | 52.70                | -1.06 |

Table S6

| Non-prime  | Prime                  | Id 1        | Id 2 | Id 3 | Protein (Id1)                  | Fold-change (log <sub>2</sub> ) | Fc standard deviation | X! Tandem hyperscore | ppm   |
|------------|------------------------|-------------|------|------|--------------------------------|---------------------------------|-----------------------|----------------------|-------|
| WSVSTMDALR | GLLPVLGQPIIR           | MSLN_HUMAN  |      |      | Mesothelin;                    | 4.70                            | 0.61                  | 39.40                | 2.22  |
| AESAEVLLPR | LVSCPGPLDQDQQAAR       | MSLN_HUMAN  |      |      | Mesothelin;                    | 3.73                            | 0.33                  | 62.80                | 0.63  |
| PPNISSLSPR | QLLGFPCAIEVSGLSTER     | MSLN_HUMAN  |      |      | Mesothelin;                    | 2.92                            | 0.30                  | 71.00                | 3.01  |
| GGLACDLPGR | FVAESAEVLLPR           | MSLN_HUMAN  |      |      | Mesothelin;                    | 1.62                            | 0.04                  | 60.10                | 1.18  |
| CTRFFSRITK | ANVDLLPR               | MSLN_HUMAN  |      |      | Mesothelin;                    | 0.02                            | 0.00                  | 33.00                | 2.48  |
| QSRHLACLPR | EPGLCTWQSLR            | TIMP1_HUMAN |      |      | Metalloproteinase inhibitor 1; | 2.86                            | 0.15                  | 35.70                | -0.07 |
| WLIAPSR    | CVPPHPQTAFCSNDLVIR     | TIMP1_HUMAN |      |      | Metalloproteinase              | 1.44                            | 0.14                  | 46.80                | 3.36  |
| QDGLLHITTC | SFVAPWNSLSLAQR         | TIMP1_HUMAN |      |      | Metalloproteinase              | 1.38                            | 0.09                  | 66.70                | 5.86  |
| GDAADIRFVY | TPAMESVCGYFHR          | TIMP1_HUMAN |      |      | Metalloproteinase inhibitor 1; | 1.33                            | 0.07                  | 34.10                | 0.57  |
| LLWLIAPSRA | CTCVPPHPQTAFCSNDLVIR   | TIMP1_HUMAN |      |      | Metalloproteinase inhibitor 1; | 1.18                            | 0.02                  | 71.30                | 3.83  |
| ACTCVPPHPQ | TAFCSNDLVIR            | TIMP1_HUMAN |      |      | Metalloproteinase inhibitor 1; | 0.93                            | 0.07                  | 54.90                | 1.13  |
| AFCNADVIR  | AKAVSEKEVDSGNDIYGNPIKR | TIMP2_HUMAN |      |      | Metalloproteinase inhibitor 2; | 5.59                            | 0.61                  | 58.40                | 4.55  |
| AKAVSEKEVD | SGNDIYGNPIKR           | TIMP2_HUMAN |      |      | Metalloproteinase inhibitor 2; | 1.56                            | 0.10                  | 32.70                | 0.86  |
| LLRPADACSC | SPVHPQQAFCNADVIR       | TIMP2_HUMAN |      |      | Metalloproteinase              | 1.33                            | 0.09                  | 79.80                | 2.79  |
| LATLLRPADA | CSCSPVHPQQAFCNADVIR    | TIMP2_HUMAN |      |      | Metalloproteinase inhibitor 2; | 1.10                            | 0.01                  | 72.90                | 2.57  |
| ATLLRPADAC | SCSPVHPQQAFCNADVIR     | TIMP2_HUMAN |      |      | Metalloproteinase              | 0.90                            | 0.08                  | 47.30                | 2.57  |

Table S6

| Non-prime  | Prime                    | Id 1         | Id 2       | Id 3 | Protein (Id1)                                  | Fold-change (log <sub>2</sub> ) | Fc standard deviation | X! Tandem hyperscore | ppm   |
|------------|--------------------------|--------------|------------|------|------------------------------------------------|---------------------------------|-----------------------|----------------------|-------|
| KLDGEKAVLE | NNLGAAVLR                | MAT2B_HUMAN  |            |      | Methionine adenosyltransferase 2 subunit beta; | 1.75                            | 0.08                  | 33.10                | 8.47  |
| MSP        | ALQDLSQPEGLKKTLR         | METH_HUMAN   |            |      | Methionine synthase;                           | 2.26                            | 0.24                  | 32.20                | 5.04  |
| MRK        | ETPPPLVPPAAR             | MEP50_HUMAN  |            |      | Methylosome protein 50;                        | 1.46                            | 0.12                  | 31.00                | 6.12  |
| M          | RKETPPPLVPPAAR           | MEP50_HUMAN  |            |      | Methylosome protein 50;                        | 0.91                            | 0.05                  | 39.30                | 5.82  |
| FALGPVSGPQ | AFPKLVR                  | C2TA_HUMAN   |            |      | MHC class II                                   | 10.56                           | 0.00                  | 15.90                | 9.24  |
| LPLRGPRARR | SASPHDVDLCLVSPCEFEHR     | MAP1S_HUMAN  |            |      | Microtubule-associated protein 1S;             | -0.02                           | 0.00                  | 52.70                | 4.47  |
| MAVNVY     | STSVTSDNLSR              | MARE1_HUMAN  |            |      | Microtubule-associated protein RP/EB family    | -0.34                           | 0.02                  | 32.00                | 3.91  |
| ELMQQVNVLK | LTVEDLEKER               | MARE1_HUMAN  |            |      | Microtubule-associated                         | -0.46                           | 0.04                  | 22.60                | 3.07  |
| MAP        | KFPDSVEELR               | TOM34_HUMAN  |            |      | Mitochondrial import                           | 3.78                            | 0.29                  | 23.00                | -1.63 |
| M          | APKFPDSVEELR             | TOM34_HUMAN  |            |      | Mitochondrial import                           | -1.80                           | 0.06                  | 26.10                | 4.15  |
| SKPVEAAVVA | AAVPSSGSGVGGGGTAGPGTGGLF | TOM70_HUMAN  |            |      | Mitochondrial import receptor subunit TOM70;   | 0.24                            | 0.02                  | 40.80                | 5.89  |
| EESLKTDPHE | IGEGKPTPALSEEASSSSIR     | IMMT_HUMAN   |            |      | Mitochondrial inner membrane protein;          | -1.29                           | 0.10                  | 62.60                | 5.40  |
| M          | VGGGGVGGGLENANPLIYQR     | MIP18_HUMAN  |            |      | Mitotic spindle-associated                     | 1.04                            | 0.07                  | 73.10                | 3.33  |
| DMKLVWPSAK | LLQAAAGASAR              | MMS19_HUMAN  |            |      | MMS19 nucleotide excision repair protein       | 1.62                            | 0.07                  | 33.00                | 2.65  |
| YGDFNKEVHK | SGYLAGDKLLPQR            | MOES_HUMAN   |            |      | Moesin;                                        | 2.18                            | 0.13                  | 28.10                | 7.45  |
| KEVYELLDSP | GKVLLQSKDQITAGNAAR       | PUR6_HUMAN   |            |      | Multifunctional protein ADE2;                  | -0.76                           | 0.06                  | 42.90                | 0.46  |
| SVPAPPRQFR | ELPDSVPQECTVR            | MYOF_HUMAN   |            |      | Myoferlin;                                     | 0.48                            | 0.03                  | 37.20                | 0.96  |
| FTEDQTAEFK | EAFQLFDR                 | MYL6_HUMAN   |            |      | Myosin light polypeptide                       | -0.76                           | 0.05                  | 36.30                | 1.04  |
| MERELEKSQR | SQISSVNSDVEALRR          | MPRIIP_HUMAN |            |      | Myosin phosphatase Rho-interacting protein;    | 0.30                            | 0.03                  | 33.20                | 3.54  |
| RCIIPNHEKK | AGKLDPHLVLDQLR           | MYH10_HUMAN  | MYH9_HUMAN |      | Myosin-10;                                     | 0.43                            | 0.02                  | 36.80                | 4.96  |

Table S6

| Non-prime   | Prime                   | Id 1        | Id 2 | Id 3 | Protein (Id1)                                                                                 | Fold-change (log <sub>2</sub> ) | Fc standard deviation | X! Tandem hyperscore | ppm   |
|-------------|-------------------------|-------------|------|------|-----------------------------------------------------------------------------------------------|---------------------------------|-----------------------|----------------------|-------|
| VRCIIPNEK   | KAGKLDPHLVLDQLR         | MYH9_HUMAN  |      |      | Myosin-9;                                                                                     | 0.51                            | 0.03                  | 30.70                | 7.02  |
| EVSSLKNKLR  | RGDLPFVVPR              | MYH9_HUMAN  |      |      | Myosin-9;                                                                                     | -0.02                           | 0.00                  | 34.70                | 2.19  |
| EAEELRARLT  | AKKQELEEICHDLER         | MYH9_HUMAN  |      |      | Myosin-9;                                                                                     | -0.62                           | 0.03                  | 36.80                | 2.33  |
| GWDRTAQLTS  | LAMLMLDSFYR             | MTM1_HUMAN  |      |      | Myotubularin;                                                                                 | 8.88                            | 1.12                  | 32.60                | 5.25  |
| GGPAPAGAAK  | MKVVEEPNAFGVNNPFLPQASR  | GNPTG_HUMAN |      |      | N-acetylglucosamine-1-                                                                        | 1.71                            | 0.05                  | 66.70                | 7.03  |
| SAGGPAPAGA  | AKMKVVEEPNAFGVNNPFLPQAS | GNPTG_HUMAN |      |      | N-acetylglucosamine-1-phosphotransferase                                                      | 1.56                            | 0.01                  | 59.00                | 2.64  |
| PAPAGAAKMK  | VVEEPNAFGVNNPFLPQASR    | GNPTG_HUMAN |      |      | N-acetylglucosamine-1-phosphotransferase                                                      | 0.74                            | 0.02                  | 50.40                | 2.80  |
| KHKKEVGKLK  | SMDLSEYIIR              | NAT10_HUMAN |      |      | N-acetyltransferase 10;                                                                       | 0.02                            | 0.00                  | 48.20                | 0.64  |
| M           | TSALENYINR              | NAA38_HUMAN |      |      | N-alpha-acetyltransferase 38, NatC auxiliary Na(+)/H(+) exchange regulatory cofactor NHE-RF1; | 2.85                            | 0.14                  | 25.20                | 5.59  |
| EKGKLGQYIR  | LVEPGSPAEEKAGLLAGDR     | NHRF1_HUMAN |      |      | Na(+)/H(+) exchange NACHT, LRR and PYD domains-containing NAD(P)H dehydrogenase [quinone] 1;  | 1.31                            | 0.07                  | 39.50                | 1.90  |
| IQKENSREAL  | AEAALESPPALVR           | NHRF1_HUMAN |      |      | NADH dehydrogenase                                                                            | 0.54                            | 0.03                  | 26.40                | -1.52 |
| EKELEQLELR  | GSKVQTLFLSK             | NALP6_HUMAN |      |      | NADH-cytochrome b5                                                                            | 4.75                            | 0.80                  | 24.70                | 7.42  |
| MVGRR       | ALIVLAHSER              | NQO1_HUMAN  |      |      | Nascent polypeptide-associated complex                                                        | -0.02                           | 0.00                  | 32.80                | 3.23  |
| WYRQHPQPYI  | FPDSPGGTSYER            | NDUB9_HUMAN |      |      | Nascent polypeptide-associated complex subunit alpha;                                         | 2.21                            | 0.21                  | 24.60                | 0.67  |
| LMKLFQRSTP  | AITLESPDIKYPLR          | NB5R3_HUMAN |      |      | Nascent polypeptide-associated complex                                                        | 1.13                            | 0.05                  | 30.70                | 0.84  |
| QDSTQATTQQ  | AQLAAAAEIDEEPVS KAKQSR  | NACA_HUMAN  |      |      | NEDD8-activating enzyme E1 regulatory                                                         | 1.03                            | 0.09                  | 57.10                | 1.73  |
| TQATTQQAQL  | AAAAEIDEEPVS KAKQSR     | NACA_HUMAN  |      |      | Nestin;                                                                                       | 0.63                            | 0.08                  | 48.70                | 1.60  |
| STQATTQQAQ  | LAAAAEIDEEPVS KAKQSR    | NACA_HUMAN  |      |      | Nestin;                                                                                       | 0.51                            | 0.03                  | 26.40                | 3.00  |
| IKNVNTALNT  | TQIPSSIEDIFNDDR         | ULA1_HUMAN  |      |      |                                                                                               | -1.34                           | 0.17                  | 29.90                | -1.90 |
| LEKETLKS LG | EIQESLKTLENQSHETLER     | NEST_HUMAN  |      |      |                                                                                               | 0.92                            | 0.08                  | 30.80                | 3.62  |
| AKRVQGLEGP  | RKDL EEAGGLGTEFSELPGKSR | NEST_HUMAN  |      |      |                                                                                               | 0.91                            | 0.05                  | 69.10                | -0.81 |

Table S6

| Non-prime  | Prime                   | Id 1        | Id 2       | Id 3 | Protein (Id1)                                      | Fold-change (log <sub>2</sub> ) | Fc standard deviation | X! Tandem hyperscore | ppm   |
|------------|-------------------------|-------------|------------|------|----------------------------------------------------|---------------------------------|-----------------------|----------------------|-------|
| GEFLESDSVS | VSVPWDDSLR              | NEST_HUMAN  |            |      | Nestin;                                            | 0.60                            | 0.04                  | 44.30                | 1.41  |
| GVLFCRPDQ  | TADMHIINGEDMGPSAR       | NEUL2_HUMAN |            |      | Neuralized-like protein 2;                         | 2.52                            | 0.09                  | 32.50                | -3.17 |
| WVQREISNFE | YLMQLNTIAGR             | NBEL2_HUMAN |            |      | Neurobeachin-like protein 2;                       | -5.06                           | 0.00                  | 28.40                | 7.99  |
| FALLAAGVAP | LSWDLPEPR               | NMB_HUMAN   |            |      | Neuromedin-B;                                      | 1.19                            | 0.07                  | 36.20                | 4.03  |
| RVSQGLNGDL | YFSNVLPEDTR             | NRCAM_HUMAN |            |      | Neuronal cell adhesion molecule;                   | -6.06                           | 0.00                  | 26.10                | 3.42  |
| ESGPERVWR  | ASWGEFQAR               | VEGF_HUMAN  |            |      | Neurosecretory protein VGF;                        | 2.22                            | 0.13                  | 29.60                | 2.85  |
| IDELEPRRPR | YRVPDVLVADPPIAR         | GANAB_HUMAN |            |      | Neutral alpha-glucosidase AB;                      | 0.60                            | 0.01                  | 37.00                | 3.16  |
| FEYAYMRWK  | ALIEMEKQQQDQVDR         | NONO_HUMAN  |            |      | Non-POU domain-containing octamer-binding protein; | 1.13                            | 0.10                  | 42.40                | 1.22  |
| AFSQFGPIER | AVVIVDDR                | NONO_HUMAN  | SFPQ_HUMAN |      | Non-POU domain-containing octamer-binding protein; | 0.78                            | 0.06                  | 30.60                | 0.22  |
| VLSTSSPAQQ | AENEAKASSILIDSEPTTNIQIR | NSF1C_HUMAN |            |      | NSFL1 cofactor p47;                                | -0.52                           | 0.04                  | 67.90                | 3.41  |
| LKATLVESST | SGFTPGGGGSSVSMIASR      | NASP_HUMAN  |            |      | Nuclear autoantigenic sperm protein;               | 0.17                            | 0.01                  | 97.70                | 1.19  |
| ELALKATLVE | SSTSGFTPGGGGSSVSMIASR   | NASP_HUMAN  |            |      | Nuclear autoantigenic sperm protein;               | 0.00                            | 0.00                  | 89.80                | 1.78  |
| IPARSQAPLE | SSLDSLGDVFLDSGR         | NUMA1_HUMAN |            |      | Nuclear mitotic apparatus protein 1;               | 1.41                            | 0.12                  | 59.10                | 8.20  |
| LRRASMQPIQ | IAEGTGITTR              | NUMA1_HUMAN |            |      | Nuclear mitotic apparatus protein 1;               | -0.43                           | 0.04                  | 23.30                | 5.32  |
| RYMTQFADQN | FSDFLFR                 | NU133_HUMAN |            |      | Nuclear pore complex                               | 2.41                            | 0.09                  | 22.50                | 0.00  |
| TSVPPGFKVF | GAPNVVEDEIDQYLSKQDGKIYR | NPL4_HUMAN  |            |      | Nuclear protein                                    | -0.52                           | 0.02                  | 38.60                | 3.49  |
| VSDSHFQRVS | AAVLPLVHPLPEGLR         | NCOR1_HUMAN |            |      | Nuclear receptor corepressor 1;                    | -0.19                           | 0.01                  | 41.80                | 0.87  |
| GETVEFDVVE | GEKGAEANVTGPGGVPVQGSKY  | YBOX1_HUMAN |            |      | Nuclease-sensitive element-binding protein 1;      | -0.69                           | 0.04                  | 46.00                | 4.38  |
| SQGRLEAQKR | ELQQAVLHMEQR            | NUCB1_HUMAN |            |      | Nucleobindin-1;                                    | 0.33                            | 0.02                  | 42.70                | 0.13  |

Table S6

| Non-prime  | Prime                 | Id 1        | Id 2       | Id 3       | Protein (Id1)                               | Fold-change (log <sub>2</sub> ) | Fc standard deviation | X! Tandem hyperscore | ppm   |
|------------|-----------------------|-------------|------------|------------|---------------------------------------------|---------------------------------|-----------------------|----------------------|-------|
| MVATTKPKAT | AKAALSLPAKQAPQGSR     | NOLC1_HUMAN |            |            | Nucleolar and coiled-body phosphoprotein 1; | 0.61                            | 0.03                  | 27.00                | 4.00  |
| QKSTWKKKVK | SLPNILTDDR            | NOL10_HUMAN |            |            | Nucleolar protein 10;                       | 1.12                            | 0.05                  | 30.90                | 4.26  |
| RKPYVLNDLE | AEASLPEKKGNTLSR       | NOP16_HUMAN |            |            | Nucleolar protein 16;                       | -0.16                           | 0.01                  | 26.80                | 3.46  |
| EEKGAVEALA | AALAHISGATSVDQR       | DDX21_HUMAN |            |            | Nucleolar RNA helicase 2;                   | 0.38                            | 0.03                  | 52.90                | -0.65 |
| ARSQPSKTLF | VKGLSEDTEETLKESFDGSVR | NUCL_HUMAN  |            |            | Nucleolin;                                  | 1.13                            | 0.07                  | 35.00                | 3.54  |
| KNLPYKVTQD | ELKEVFEDAAEIR         | NUCL_HUMAN  |            |            | Nucleolin;                                  | 0.26                            | 0.01                  | 38.80                | 0.68  |
| NFNKSAPELK | TGISDVFAKNDLAVVDVR    | NUCL_HUMAN  |            |            | Nucleolin;                                  | -0.19                           | 0.01                  | 54.70                | 3.09  |
| NLPYKVTQDE | LKEVFEDAAEIR          | NUCL_HUMAN  |            |            | Nucleolin;                                  | -0.37                           | 0.02                  | 43.90                | -0.13 |
| TLLAKNLPYK | VTQDELKEVFEDAAEIR     | NUCL_HUMAN  |            |            | Nucleolin;                                  | -0.37                           | 0.04                  | 43.40                | 2.00  |
| FNKSAPELKT | GISDVFAKNDLAVVDVR     | NUCL_HUMAN  |            |            | Nucleolin;                                  | -1.29                           | 0.10                  | 51.50                | 7.20  |
| MSVQPTVSLG | GFEITPPVVLRL          | NPM_HUMAN   |            |            | Nucleophosmin;                              | 1.14                            | 0.04                  | 30.80                | 4.22  |
| M          | AICQFFLQGR            | NUPL2_HUMAN |            |            | Nucleoporin-like protein 2;                 | 0.87                            | 0.04                  | 44.10                | -5.26 |
| ERPSTSTAVF | GTVSATPSSSLPKR        | TPR_HUMAN   |            |            | Nucleoprotein TPR;                          | 1.26                            | 0.11                  | 24.60                | 5.95  |
| EGLNVVKTGR | VMLGETNPADSKPGTIR     | NDKA_HUMAN  | NDK8_HUMAN | NDKB_HUMAN | Nucleoside diphosphate kinase A;            | 4.00                            | 0.41                  | 29.50                | -2.60 |
| QNPQILAALQ | ERLDGLVETPTGYIESLPR   | NP1L1_HUMAN |            |            | Nucleosome assembly protein 1-like 1;       | 2.41                            | 0.15                  | 57.30                | 0.69  |
| ARQLTVQMMQ | NPQILAALQER           | NP1L1_HUMAN |            |            | Nucleosome assembly protein 1-like 1;       | 1.95                            | 0.16                  | 47.70                | 0.62  |
| ALQERLDGLV | ETPTGYIESLPR          | NP1L1_HUMAN |            |            | Nucleosome assembly protein 1-like 1;       | 1.61                            | 0.08                  | 40.10                | 5.25  |
| LKARQLTVQM | MQNPQILAALQER         | NP1L1_HUMAN |            |            | Nucleosome assembly protein 1-like 1;       | 1.53                            | 0.10                  | 68.90                | 4.27  |

Table S6

| Non-prime   | Prime                    | Id 1        | Id 2       | Id 3 | Protein (Id1)                                      | Fold-change (log <sub>2</sub> ) | Fc standard deviation | X! Tandem hyperscore | ppm  |
|-------------|--------------------------|-------------|------------|------|----------------------------------------------------|---------------------------------|-----------------------|----------------------|------|
| KARQLTVQMM  | QNPQILAALQER             | NP1L1_HUMAN |            |      | Nucleosome assembly                                | 1.41                            | 0.11                  | 51.50                | 9.58 |
| YEEVHDLERK  | YAVLYQPLFDKR             | NP1L1_HUMAN |            |      | Nucleosome assembly                                | 1.01                            | 0.05                  | 28.70                | 1.90 |
| ILAALQERLD  | GLVETPTGYIESLPR          | NP1L1_HUMAN |            |      | Nucleosome assembly protein 1-like 1;              | -0.49                           | 0.03                  | 81.40                | 3.48 |
| RTRSSTCGPP  | AFLGVFGR                 | MACD1_HUMAN |            |      | O-acetyl-ADP-ribose                                | 4.71                            | 0.17                  | 20.80                | 5.58 |
| LLLSGRPTRA  | DSKVFGDLDQVR             | OLM2A_HUMAN |            |      | Olfactomedin-like protein 2A;                      | 2.19                            | 0.16                  | 40.90                | 1.18 |
| RGVHSSVASA  | TSVATKKTQVGPPTSDDIFER    | OAT_HUMAN   |            |      | Ornithine aminotransferase,                        | 0.94                            | 0.07                  | 40.50                | 2.35 |
| VDSEWGFYR   | SGQAKETIPLQETSPLYTQDR    | PPT1_HUMAN  |            |      | Palmitoyl-protein                                  | 0.20                            | 0.02                  | 77.30                | 3.55 |
| SMPQDFRPVS  | SIIDVDILPETHR            | PAR6B_HUMAN |            |      | Partitioning defective 6 homolog beta;             | -0.52                           | 0.02                  | 35.20                | 1.55 |
| YSGSVAPANS  | ALGQTQPSDQDTLVQR         | PDL15_HUMAN |            |      | PDZ and LIM domain protein 5;                      | 0.13                            | 0.01                  | 50.70                | 2.12 |
| TYSGSVAPAN  | SALGQTQPSDQDTLVQR        | PDL15_HUMAN |            |      | PDZ and LIM domain                                 | -0.04                           | 0.00                  | 30.90                | 1.97 |
| RISNSATYSG  | SVAPANSALGQTQPSDQDTLVQR  | PDL15_HUMAN |            |      | PDZ and LIM domain protein 5;                      | -0.19                           | 0.02                  | 62.90                | 5.83 |
| TGRISNSATY  | SGSVAPANSALGQTQPSDQDTLVQ | PDL15_HUMAN |            |      | PDZ and LIM domain protein 5;                      | -0.43                           | 0.04                  | 71.20                | 3.39 |
| CAPGAPAEAR  | LTSALDELLQATR            | PTX3_HUMAN  |            |      | Pentraxin-related protein PTX3;                    | 4.13                            | 0.58                  | 59.80                | 5.48 |
| APGAPAEARL  | TSALDELLQATR             | PTX3_HUMAN  |            |      | Pentraxin-related protein PTX3;                    | 3.72                            | 0.28                  | 61.90                | 8.09 |
| MLENSQMRER  | MLLQATDDVLR              | PTX3_HUMAN  |            |      | Pentraxin-related protein PTX3;                    | 2.48                            | 0.19                  | 41.70                | 5.91 |
| LQRLREELGR  | LAESLARPCAPGAPAEAR       | PTX3_HUMAN  |            |      | Pentraxin-related protein                          | 2.22                            | 0.10                  | 34.50                | 3.16 |
| LLVFPSSCLA  | FRSPLSVFKR               | AMD_HUMAN   |            |      | Peptidyl-glycine alpha-                            | 1.26                            | 0.03                  | 31.80                | 3.17 |
| FGYKGSFCFHR | IIPGFMCQGGDFTR           | PAL4A_HUMAN | PPIA_HUMAN |      | Peptidyl-prolyl cis-trans isomerase A-like 4A/B/C; | 2.88                            | 0.19                  | 33.50                | 3.69 |
| AVDGEPLGRV  | SFELFADKVPKTAENFR        | PPIA_HUMAN  |            |      | Peptidyl-prolyl cis-trans isomerase A;             | 0.24                            | 0.00                  | 30.30                | 1.76 |



Table S6

| Non-prime   | Prime                | Id 1        | Id 2        | Id 3 | Protein (Id1)                               | Fold-change (log <sub>2</sub> ) | Fc standard deviation | X! Tandem hyperscore | ppm   |
|-------------|----------------------|-------------|-------------|------|---------------------------------------------|---------------------------------|-----------------------|----------------------|-------|
| LDGKHVVFVK  | VKEGMNIVEAMER        | PPIA_HUMAN  |             |      | Peptidyl-prolyl cis-trans isomerase A;      | -0.55                           | 0.02                  | 24.40                | 4.28  |
| M           | GVQVETISPGDGR        | FKB1A_HUMAN |             |      | Peptidyl-prolyl cis-trans isomerase FKBP1A; | -0.16                           | 0.01                  | 60.20                | -0.97 |
| DSNNEKGLFR  | RGEAHLAVNDFELAR      | FKBP4_HUMAN |             |      | Peptidyl-prolyl cis-trans isomerase FKBP9;  | 0.42                            | 0.05                  | 52.10                | 0.64  |
| VTGQAAPVAG  | LGSDAELQIER          | FKBP9_HUMAN |             |      | Peptidyl-prolyl cis-trans isomerase-like 2; | 1.22                            | 0.09                  | 35.40                | 5.61  |
| TGKVSASFTS  | TAMVPETTHEAAAIDEDVLR | PPIL2_HUMAN |             |      | Perilipin-3;                                | -0.72                           | 0.06                  | 61.90                | 4.26  |
| MSADGAEAD   | GSTQVTVEEPVQQPSVVDR  | PLIN3_HUMAN |             |      | Perilipin-4;                                | 0.00                            | 0.00                  | 60.00                | 4.73  |
| VSSGVASVVD  | VAKGVVQGGLDTTR       | PLIN4_HUMAN |             |      | Peroxioredoxin-1;                           | 0.72                            | 0.08                  | 44.30                | 1.85  |
| FIIDGKGVLR  | QITVNDLPVGR          | PRDX1_HUMAN | PRDX2_HUMAN |      | Peroxioredoxin-1;                           | 5.10                            | 0.50                  | 32.70                | 3.39  |
| NIPLVSDPKR  | TIAQDYGVKKADEGISFR   | PRDX1_HUMAN |             |      | Peroxioredoxin-1;                           | 0.87                            | 0.07                  | 37.30                | 4.85  |
| YLED SGHTLR | GLFIIDDKGILR         | PRDX1_HUMAN | PRDX4_HUMAN |      | Peroxioredoxin-1;                           | 0.68                            | 0.06                  | 30.80                | 2.17  |
| VSDPKRTIAQ  | DYGVKKADEGISFR       | PRDX1_HUMAN |             |      | Peroxioredoxin-1;                           | 0.63                            | 0.02                  | 31.20                | 2.38  |
| HLAWVNTPKK  | QGGLGPMNIPLVSDPKR    | PRDX1_HUMAN |             |      | Peroxioredoxin-1;                           | 0.20                            | 0.01                  | 42.20                | 3.30  |
| CHLAWVNTPK  | KQGGLGPMNIPLVSDPKR   | PRDX1_HUMAN |             |      | Peroxioredoxin-1;                           | 0.00                            | 0.00                  | 39.50                | 2.34  |
| VVFFFYPLDF  | TFVCPTEIIAFSDR       | PRDX1_HUMAN |             |      | Peroxioredoxin-1;                           | -0.32                           | 0.02                  | 50.70                | 0.59  |
| EDSGHTLRGL  | FIIDDKGILR           | PRDX1_HUMAN | PRDX4_HUMAN |      | Peroxioredoxin-1;                           | -5.06                           | 1.69                  | 23.20                | 2.30  |
| FIIDDKGILR  | QITLNDLPVGR          | PRDX4_HUMAN |             |      | Peroxioredoxin-4;                           | 8.40                            | 1.63                  | 29.40                | 4.06  |
| MPGGLLLG    | DVAPNFEANTTVGR       | PRDX6_HUMAN |             |      | Peroxioredoxin-6;                           | 1.26                            | 0.11                  | 63.40                | 8.55  |

Table S6

| Non-prime  | Prime                | Id 1        | Id 2       | Id 3 | Protein (Id1)                                  | Fold-change (log <sub>2</sub> ) | Fc standard deviation | X! Tandem hyperscore | ppm   |
|------------|----------------------|-------------|------------|------|------------------------------------------------|---------------------------------|-----------------------|----------------------|-------|
| KKKVEKGVLN | VHPAASASKPSADQIR     | PHF3_HUMAN  |            |      | PHD finger protein 3;                          | 0.78                            | 0.04                  | 30.30                | 2.05  |
| MPTVSVKR   | DLLFQALGR            | SYFB_HUMAN  |            |      | Phenylalanine--tRNA                            | 1.25                            | 0.09                  | 44.30                | 3.86  |
| MAERGGAGG  | GPGGAGGGSGQR         | PACS1_HUMAN |            |      | Phosphofurin acidic cluster sorting protein 1; | 3.06                            | 0.24                  | 22.70                | 0.61  |
| FTDGSRIVFR | LSGTGSAGATIR         | PGM1_HUMAN  |            |      | Phosphoglucomutase-1;                          | 1.90                            | 0.11                  | 36.00                | 5.00  |
| AEPDKIEAFR | ASLSKLGDVYVNDAFGTAHR | PGK1_HUMAN  | PGK2_HUMAN |      | Phosphoglycerate kinase 1;                     | 0.50                            | 0.03                  | 46.90                | 3.58  |
| EKACANPAPG | SVILLENLR            | PGK1_HUMAN  | PGK2_HUMAN |      | Phosphoglycerate kinase 1;                     | -0.26                           | 0.01                  | 40.70                | 2.11  |
| IEAFRASLSK | LGDVYVNDAFGTAHR      | PGK1_HUMAN  | PGK2_HUMAN |      | Phosphoglycerate kinase 1;                     | -0.80                           | 0.04                  | 53.70                | 2.39  |
| ISKDRRYADL | TEDQLPSCESLKDTIAR    | PGAM1_HUMAN |            |      | Phosphoglycerate mutase 1;                     | 0.38                            | 0.04                  | 33.10                | 2.26  |
| GISVLEMSHR | SSDFAKIINNTENLVR     | SERC_HUMAN  |            |      | Phosphoserine                                  | 2.28                            | 0.10                  | 49.20                | 3.62  |
| KVIFLQGGGC | GQFSAVPLNLIGLKAGR    | SERC_HUMAN  |            |      | Phosphoserine                                  | 0.06                            | 0.00                  | 37.70                | 1.82  |
| VGSAGVTVVI | VRDDLGFALR           | SERC_HUMAN  |            |      | Phosphoserine aminotransferase;                | -2.05                           | 0.17                  | 48.00                | 5.04  |
| LTGESDHVKK | SLDKDPLLLSGTHVMEGSGR | AT2B1_HUMAN |            |      | Plasma membrane Plasminogen activator          | 0.86                            | 0.05                  | 35.40                | 1.52  |
| GGGVGGPGAK | SAAQAAAQTNNAAGKQLR   | PAIRB_HUMAN |            |      | inhibitor 1 RNA-binding Plasminogen activator  | 0.75                            | 0.07                  | 59.60                | 1.76  |
| MPG        | HLQEGFGCVVTNR        | PAIRB_HUMAN |            |      | inhibitor 1 RNA-binding protein;               | -0.07                           | 0.01                  | 48.20                | 1.68  |
| LGLALVFEGE | SAVHHPPSYVAHLASDFGVR | PAI1_HUMAN  |            |      | Plasminogen activator                          | 0.64                            | 0.03                  | 50.40                | -1.29 |
| KRPLPIRRKR | SIEEAVPAVCKTR        | PDGFA_HUMAN |            |      | Platelet-derived growth factor subunit A;      | 2.37                            | 0.08                  | 42.90                | 1.57  |
| KRPLPIRRKR | SIEEAVPAVCK          | PDGFA_HUMAN |            |      | Platelet-derived growth                        | 2.18                            | 0.23                  | 26.80                | 1.35  |

Table S6

| Non-prime  | Prime                   | Id 1        | Id 2 | Id 3 | Protein (Id1)                             | Fold-change (log <sub>2</sub> ) | Fc standard deviation | X! Tandem hyperscore | ppm   |
|------------|-------------------------|-------------|------|------|-------------------------------------------|---------------------------------|-----------------------|----------------------|-------|
| LCCYLRLVSA | EGDPIPEELYEMLSDHSIR     | PDGFB_HUMAN |      |      | Platelet-derived growth factor subunit B; | -3.24                           | 0.31                  | 41.10                | 2.56  |
| SRSSSVGSSS | SYPISPAVSR              | PLEC_HUMAN  |      |      | Plectin;                                  | 0.13                            | 0.00                  | 26.40                | 1.72  |
| EAAVDAQQK  | RSIQEELQQLR             | PLEC_HUMAN  |      |      | Plectin;                                  | 0.11                            | 0.01                  | 31.10                | 4.60  |
| LLPLSEKAAR | ARQEELYSELQAR           | PLEC_HUMAN  |      |      | Plectin;                                  | 0.09                            | 0.01                  | 56.70                | 0.98  |
| LLQETQALQQ | SFLSEKDSLLQR            | PLEC_HUMAN  |      |      | Plectin;                                  | 0.02                            | 0.00                  | 27.70                | 2.55  |
| CAQRIAEQK  | AQAEVEGLGKGVAR          | PLEC_HUMAN  |      |      | Plectin;                                  | -0.19                           | 0.02                  | 36.10                | -2.08 |
| RSRSSSVGSS | SSYPISPAVSR             | PLEC_HUMAN  |      |      | Plectin;                                  | -0.76                           | 0.05                  | 33.70                | 5.53  |
| VAQVTLQSVQ | RRPELEDSTLR             | PLEC_HUMAN  |      |      | Plectin;                                  | -0.83                           | 0.03                  | 24.20                | 0.92  |
| ILALKASFEK | AAAGKAELELELGR          | PLEC_HUMAN  |      |      | Plectin;                                  | -0.96                           | 0.06                  | 25.90                | 1.80  |
| LPSDMAVALL | EAQAGTGHIDPATSAR        | PLEC_HUMAN  |      |      | Plectin;                                  | -1.14                           | 0.08                  | 39.30                | 1.04  |
| PSDMAVALLE | AQAGTGHIDPATSAR         | PLEC_HUMAN  |      |      | Plectin;                                  | -1.19                           | 0.05                  | 25.50                | 1.75  |
| LQQRCPDQL  | TGLSLLPLSEKAAR          | PLEC_HUMAN  |      |      | Plectin;                                  | -1.40                           | 0.15                  | 26.80                | 3.80  |
| ILSPWGAEVK | AEPVEVVAPR              | PARP1_HUMAN |      |      | Poly [ADP-ribose]                         | -0.14                           | 0.01                  | 41.10                | 1.92  |
| LDAYSIQGQH | TISPLDLAKLNQVAR         | PCBP1_HUMAN |      |      | Poly(rC)-binding protein 1;               | 1.47                            | 0.11                  | 33.90                | 2.24  |
| PEVKGWGLD  | ASAQTTSHELTIPNDLIGCIIGR | PCBP2_HUMAN |      |      | Poly(rC)-binding protein 2;               | 0.72                            | 0.06                  | 66.10                | 1.64  |
| TNLQMAAVTM | GFGDPLSPLQSMQAQR        | PUF60_HUMAN |      |      | Poly(U)-binding-splicing factor PUF60;    | 0.24                            | 0.01                  | 89.20                | 1.70  |
| LTKVVQNDAY | TAPALPSSIR              | PDIP3_HUMAN |      |      | Polymerase delta-interacting protein 3;   | 0.92                            | 0.08                  | 33.70                | 1.24  |
| AFLWVLGIAY | YMYSGGGSALAGGAGGAGR     | GALT2_HUMAN |      |      | Polypeptide N-                            | 0.98                            | 0.10                  | 123.50               | 3.44  |
| FAFLWVLGIA | YYMYSGGGSALAGGAGGAGR    | GALT2_HUMAN |      |      | Polypeptide N-acetylgalactosaminyltrans   | 0.98                            | 0.06                  | 128.70               | -0.10 |

Table S6

| Non-prime  | Prime                     | Id 1        | Id 2 | Id 3 | Protein (Id1)                                         | Fold-change (log <sub>2</sub> ) | Fc standard deviation | X! Tandem hyperscore | ppm   |
|------------|---------------------------|-------------|------|------|-------------------------------------------------------|---------------------------------|-----------------------|----------------------|-------|
| LWVLGIAYYM | YSGGGSALAGGAGGGAGR        | GALT2_HUMAN |      |      | Polypeptide N-acetylgalactosaminyltransferase 2;      | 0.91                            | 0.08                  | 84.00                | 5.83  |
| FLWVLGIAYY | MYSGGGSALAGGAGGGAGR       | GALT2_HUMAN |      |      | Polypeptide N-acetylgalactosaminyltransferase 2;      | 0.85                            | 0.11                  | 128.30               | 2.09  |
| LTVAYIFVEL | LVSTFHASAGAGR             | GALT4_HUMAN |      |      | Polypeptide N-acetylgalactosaminyltransferase 4;      | 1.31                            | 0.13                  | 35.70                | 1.53  |
| AASAAVDAG  | MAMAGQSPVLR               | PTBP1_HUMAN |      |      | Polypyrimidine tract-binding protein 1;               | 1.72                            | 0.11                  | 47.00                | -1.00 |
| QTMAAAFGLS | VPNVHGALAPLAIPSAAAAAAAAAA | PTBP1_HUMAN |      |      | Polypyrimidine tract-binding protein 1;               | 0.04                            | 0.00                  | 69.50                | 0.88  |
| PNVHGALAPL | AIPSAAAAAAAAAAGR          | PTBP1_HUMAN |      |      | Polypyrimidine tract-binding protein 1;               | -0.09                           | 0.00                  | 51.50                | 4.59  |
| AGRIAPGLA  | GAGNSVLLVSNLNPER          | PTBP1_HUMAN |      |      | Polypyrimidine tract-binding protein 1;               | -0.52                           | 0.03                  | 63.00                | 4.24  |
| MD         | GIVPDIAVGTKR              | PTBP1_HUMAN |      |      | Polypyrimidine tract-binding protein 1;               | -0.80                           | 0.04                  | 36.20                | 1.09  |
| AFGLSVPNVH | GALAPLAIPSAAAAAAAAAAGR    | PTBP1_HUMAN |      |      | Polypyrimidine tract-binding protein 1;               | -0.83                           | 0.03                  | 89.70                | 6.74  |
| MDG        | IVPDIAVGTKR               | PTBP1_HUMAN |      |      | Polypyrimidine tract-binding protein 1;               | -0.96                           | 0.06                  | 21.30                | 1.13  |
| ALAASAAVD  | AGMAMAGQSPVLR             | PTBP1_HUMAN |      |      | Polypyrimidine tract-binding protein 1;               | -1.04                           | 0.07                  | 59.60                | 2.64  |
| MRSEK      | SLTLAAPGEVR               | KCNA6_HUMAN |      |      | Potassium voltage-gated channel subfamily A member 6; | 6.26                            | 0.83                  | 27.10                | 3.33  |
| QTDVGITHFR | SGMSHEEDQLIPNLYR          | PRP8_HUMAN  |      |      | Pre-mRNA-processing-splicing factor 8;                | 0.46                            | 0.02                  | 42.10                | -1.87 |
| KAPAPRPSLL | GLDLLASLKR                | PRP16_HUMAN |      |      | Pre-mRNA-splicing factor ATP-dependent RNA            | -0.96                           | 0.09                  | 30.30                | -4.41 |
| EDEEGQKVTI | HDKTEINLVSFR              | CWC22_HUMAN |      |      | Pre-mRNA-splicing factor                              | 6.89                            | 0.96                  | 38.70                | -7.59 |

Table S6

| Non-prime  | Prime                  | Id 1        | Id 2       | Id 3 | Protein (Id1)                                 | Fold-change (log <sub>2</sub> ) | Fc standard deviation | X! Tandem hyperscore | ppm   |
|------------|------------------------|-------------|------------|------|-----------------------------------------------|---------------------------------|-----------------------|----------------------|-------|
| MAENSGRAGK | SSGSGAGKGAVSAEQVIAGFNR | PFD2_HUMAN  |            |      | Prefoldin subunit 2;                          | -0.09                           | 0.01                  | 69.80                | -2.37 |
| ALSTALSEKR | TLEGELHDLR             | LMNA_HUMAN  |            |      | Prelamin-A/C;                                 | 2.68                            | 0.25                  | 29.20                | 6.18  |
| NTWGCNSLR  | TALINSTGEEVAMR         | LMNA_HUMAN  |            |      | Prelamin-A/C;                                 | 1.64                            | 0.08                  | 49.80                | 5.06  |
| LDNARQSAER | NSNLVGAAHEELQQSR       | LMNA_HUMAN  |            |      | Prelamin-A/C;                                 | 1.47                            | 0.10                  | 42.40                | 2.75  |
| ETPSQRRATR | SGAQASSTPLSPTR         | LMNA_HUMAN  |            |      | Prelamin-A/C;                                 | 0.15                            | 0.01                  | 72.40                | 1.29  |
| DNARQSAERN | SNLVGAAHEELQQSR        | LMNA_HUMAN  |            |      | Prelamin-A/C;                                 | -0.11                           | 0.01                  | 35.30                | 0.00  |
| ARQSAERNSN | LVGAAHEELQQSR          | LMNA_HUMAN  |            |      | Prelamin-A/C;                                 | -0.52                           | 0.05                  | 36.30                | 0.20  |
| PSQRRATRSG | AQASSTPLSPTR           | LMNA_HUMAN  |            |      | Prelamin-A/C;                                 | -0.76                           | 0.01                  | 44.70                | 8.44  |
| TEVVAPFMAN | IPLLLYPQDGPR           | SAP_HUMAN   |            |      | Proactivator polypeptide;                     | 0.97                            | 0.04                  | 29.10                | 2.98  |
| PRSKPQPKDN | GDVCQDCIQMVTDIQTAVR    | SAP_HUMAN   |            |      | Proactivator polypeptide;                     | 0.38                            | 0.04                  | 75.80                | 2.81  |
| EEIMAEKENK | TIIFVETKR              | DDX17_HUMAN |            |      | Probable ATP-dependent RNA helicase DDX17;    | 1.37                            | 0.06                  | 29.70                | 0.09  |
| WVLNEFKHGK | APILIATDVASR           | DDX17_HUMAN | DDX5_HUMAN |      | Probable ATP-dependent RNA helicase DDX17;    | 0.57                            | 0.05                  | 39.80                | 7.85  |
| ERDWVLNEFR | SGKAPILIATDVASR        | DDX17_HUMAN |            |      | Probable ATP-dependent RNA helicase DDX17;    | 0.15                            | 0.01                  | 43.60                | 1.59  |
| QREFALSNLK | AGAKDILVATDVAGR        | DDX23_HUMAN |            |      | Probable ATP-dependent RNA helicase DDX23;    | 0.61                            | 0.04                  | 52.50                | -1.19 |
| QSEAQINTAK | RLLEKKGKEAVVQEPER      | DDX27_HUMAN |            |      | Probable ATP-dependent RNA helicase DDX27;    | 0.45                            | 0.04                  | 43.60                | 3.93  |
| QKAEGKIIKK | SSGFSGKGFKDETEQALANER  | DDX46_HUMAN |            |      | Probable ATP-dependent RNA helicase DDX46;    | 0.61                            | 0.04                  | 39.60                | 3.39  |
| QKNLGIESQD | VMQQATNAILR            | DDX46_HUMAN |            |      | Probable ATP-dependent RNA helicase DDX46;    | -1.52                           | 0.18                  | 39.40                | 5.94  |
| ERDWVLNEFK | HGKAPILIATDVASR        | DDX5_HUMAN  |            |      | Probable ATP-dependent RNA helicase DDX5;     | 0.64                            | 0.05                  | 46.20                | 1.49  |
| HILGDPNLTK | FSVILDEAHER            | DHX40_HUMAN |            |      | Probable ATP-dependent RNA helicase DHX40;    | 2.29                            | 0.13                  | 65.10                | 0.21  |
|            | MKDSLVLGR              | CIAO1_HUMAN |            |      | Probable cytosolic iron-sulfur protein CIAO1; | 0.48                            | 0.03                  | 41.90                | 0.67  |
| DKPISLQNWK | RGLDILSPMER            | EXO5_HUMAN  |            |      | Probable exonuclease V;                       | 4.62                            | 0.43                  | 36.80                | 6.76  |

Table S6

| Non-prime  | Prime                   | Id 1        | Id 2 | Id 3 | Protein (Id1)                                  | Fold-change (log <sub>2</sub> ) | Fc standard deviation | X! Tandem hyperscore | ppm  |
|------------|-------------------------|-------------|------|------|------------------------------------------------|---------------------------------|-----------------------|----------------------|------|
| SPQSSAGGKP | AMSYASALR               | HELZ_HUMAN  |      |      | Probable helicase with zinc finger domain;     | 3.24                            | 0.16                  | 24.40                | 0.90 |
| GWLLLAEEKG | DAKPEDNLLVLTVATKETEGFRR | PLOD1_HUMAN |      |      | Procollagen-lysine,2-oxoglutarate 5-           | 1.18                            | 0.02                  | 41.20                | 0.11 |
| PSVWAAPGK  | TFVNITPAEVGVLVGKDR      | PROF1_HUMAN |      |      | Profilin-1;                                    | 0.06                            | 0.00                  | 47.10                | 4.99 |
| VWAAPGKTF  | VNITPAEVGVLVGKDR        | PROF1_HUMAN |      |      | Profilin-1;                                    | -0.88                           | 0.05                  | 24.80                | 3.57 |
| MYPVFNELER | VNLSAAQTLR              | PDC10_HUMAN |      |      | Programmed cell death                          | 2.47                            | 0.18                  | 30.00                | 3.81 |
| PGYIKLRKIR | AAQNISKTIATSQNR         | PHB2_HUMAN  |      |      | Prohibitin-2;                                  | 1.37                            | 0.12                  | 37.60                | 2.21 |
| SGPFEPDLYK | SEMEVQDAELKALLQSSASR    | PA2G4_HUMAN |      |      | Proliferation-associated protein 2G4;          | 0.04                            | 0.00                  | 53.60                | 3.05 |
| VESEAGWGMV | TPDLLFAEGTAAYAR         | P3H1_HUMAN  |      |      | Prolyl 3-hydroxylase 1;                        | 1.11                            | 0.07                  | 21.60                | 1.53 |
| HGAGWQLFCR | TVWSAHSGPTR             | PCSK9_HUMAN |      |      | Proprotein convertase subtilisin/kexin type 9; | 4.57                            | 0.25                  | 24.20                | 2.03 |
| AELRQLIHF  | SAKDVINEAWFPEDQR        | PCSK9_HUMAN |      |      | Proprotein convertase subtilisin/kexin type 9; | 2.74                            | 0.12                  | 38.50                | 0.10 |
| PEEDGTRFHR | QASKCDSHGTHLAGVVSGR     | PCSK9_HUMAN |      |      | Proprotein convertase subtilisin/kexin type 9; | 1.19                            | 0.08                  | 58.70                | 3.88 |
| RFHRQASKCD | SHGTHLAGVVSGR           | PCSK9_HUMAN |      |      | Proprotein convertase subtilisin/kexin type 9; | 0.54                            | 0.03                  | 35.70                | 4.66 |
| GGKLCRAHN  | AFGGEGVYAIAR            | PCSK9_HUMAN |      |      | Proprotein convertase subtilisin/kexin type 9; | 0.37                            | 0.02                  | 50.70                | 0.16 |
| IEEDSSVFAQ | SIPWNLER                | PCSK9_HUMAN |      |      | Proprotein convertase                          | -0.02                           | 0.00                  | 22.90                | 1.25 |
| GVAAPRRLRR | AADHDVGSSELPPGVLGALLR   | PCSK1_HUMAN |      |      | ProSAAS;                                       | 1.31                            | 0.11                  | 61.50                | 4.19 |
| ETGAPRRFR  | SVPRGEAAGAVQELAR        | PCSK1_HUMAN |      |      | ProSAAS;                                       | 1.31                            | 0.10                  | 42.50                | 1.40 |
| LLGVLGDLQA | APEAQVSVQPNFQQDKFLGR    | PTGDS_HUMAN |      |      | Prostaglandin-H2 D-                            | 8.85                            | 0.99                  | 29.10                | 2.33 |
| GVLGDLQAAP | EAQVSVQPNFQQDKFLGR      | PTGDS_HUMAN |      |      | Prostaglandin-H2 D-isomerase;                  | 6.58                            | 1.40                  | 38.40                | 4.61 |
| EEPGEMLHG  | TTTTLAFKFR              | PSB5_HUMAN  |      |      | Proteasome subunit beta                        | 0.22                            | 0.02                  | 15.40                | 2.60 |
| RDGSSGGVIR | LAAIAESGVER             | PSB6_HUMAN  |      |      | Proteasome subunit beta type-6;                | 3.83                            | 0.45                  | 48.10                | 1.66 |
| YKLPKVRKTG | TTIAGVVYKDGIVLGADTR     | PSB7_HUMAN  |      |      | Proteasome subunit beta type-7;                | 0.13                            | 0.01                  | 70.90                | 2.53 |

Table S6

| Non-prime  | Prime                   | Id 1        | Id 2 | Id 3 | Protein (Id1)                       | Fold-change (log <sub>2</sub> ) | Fc standard deviation | X! Tandem hyperscore | ppm  |
|------------|-------------------------|-------------|------|------|-------------------------------------|---------------------------------|-----------------------|----------------------|------|
| LPSKCEVCKL | LSTELQAELSR             | CNPY4_HUMAN |      |      | Protein canopy homolog 4;           | 0.92                            | 0.09                  | 35.70                | 2.82 |
| PPTQPSPASD | SGSGYVPGSVSAAFVTCNEKVAK | CUTA_HUMAN  |      |      | Protein CutA;                       | -1.65                           | 0.16                  | 41.90                | 1.71 |
| MEDQDGLLGK | ELGFDASEVELTR           | CYR61_HUMAN |      |      | Protein CYR61;                      | -0.58                           | 0.05                  | 59.90                | 1.40 |
| IAVGKGSSLK | RLPVFGMEPR              | CYR61_HUMAN |      |      | Protein CYR61;                      | -0.96                           | 0.02                  | 51.20                | 2.75 |
| LLHLTRLALS | TCPAACHCPLEAPKCAPGVGLVR | CYR61_HUMAN |      |      | Protein CYR61;                      | -1.00                           | 0.04                  | 47.50                | 1.74 |
| LLAAARLAAA | SDVLELTDDNFESR          | PDIA3_HUMAN |      |      | Protein disulfide-                  | 0.37                            | 0.02                  | 85.10                | 2.33 |
| WVVLPSWLSS | AKVSSLIER               | PDIA5_HUMAN |      |      | Protein disulfide-isomerase A5;     | 0.89                            | 0.10                  | 24.60                | 1.89 |
| SCTFFLAVNG | LYSSSDDVIELTPSNFNR      | PDIA6_HUMAN |      |      | Protein disulfide-isomerase A6;     | 0.20                            | 0.01                  | 77.60                | 5.27 |
| CLAVAALVRA | DAPEEEDHVLVLR           | PDIA1_HUMAN |      |      | Protein disulfide-                  | 0.28                            | 0.02                  | 44.70                | 1.74 |
|            | M AVTGWLESLR            | DPCD_HUMAN  |      |      | Protein DPCD;                       | 0.61                            | 0.03                  | 44.10                | 1.63 |
| LLSLGRFVRG | DGVGGDPAVALPHR          | LMAN1_HUMAN |      |      | Protein ERGIC-53;                   | 0.70                            | 0.02                  | 56.80                | 3.08 |
| PETPAPAARS | AAPSSVPAAPGPEPRVVR      | F110C_HUMAN |      |      | Protein FAM110C;                    | 0.20                            | 0.01                  | 35.30                | 2.22 |
| TFYVISQVFE | IKMDASLGNLFAR           | FAM3C_HUMAN |      |      | Protein FAM3C;                      | 0.70                            | 0.02                  | 37.60                | 2.01 |
| VISQVFEIKM | DASLGNLFAR              | FAM3C_HUMAN |      |      | Protein FAM3C;                      | 0.53                            | 0.03                  | 47.20                | 2.11 |
| YVISQVFEIK | MDASLGNLFAR             | FAM3C_HUMAN |      |      | Protein FAM3C;                      | 0.30                            | 0.02                  | 43.00                | 2.20 |
| RRLIADLGST | SITNLGFR                | FAM3C_HUMAN |      |      | Protein FAM3C;                      | -2.34                           | 0.24                  | 33.70                | 1.49 |
| RDAEKKDQMK | ADLTALFLPR              | FLII_HUMAN  |      |      | Protein flightless-1 homolog;       | 0.84                            | 0.07                  | 48.30                | 4.34 |
|            | M FGCLVAGR              | CK073_HUMAN |      |      | Protein Hikeshi;                    | 0.33                            | 0.03                  | 25.70                | 0.19 |
| IMALMNTLLY | LCLDHFFIAPR             | SG196_HUMAN |      |      | Protein kinase-like protein         | 1.13                            | 0.07                  | 29.90                | 1.83 |
| MALMNTLLYL | CLDHFFIAPR              | SG196_HUMAN |      |      | Protein kinase-like protein SgK196; | 0.31                            | 0.01                  | 44.10                | 0.31 |

Table S6

| Non-prime   | Prime                  | Id 1        | Id 2        | Id 3 | Protein (Id1)                                            | Fold-change (log <sub>2</sub> ) | Fc standard deviation | X! Tandem hyperscore | ppm   |
|-------------|------------------------|-------------|-------------|------|----------------------------------------------------------|---------------------------------|-----------------------|----------------------|-------|
| LLLPA SLTGG | VGSLNLEELSEMR          | OS9_HUMAN   |             |      | Protein OS-9;                                            | 1.37                            | 0.06                  | 54.90                | 1.79  |
| RSRQARQSRR  | STQGVTLTDLQEAETIGR     | MYPT1_HUMAN |             |      | Protein phosphatase 1                                    | -0.96                           | 0.07                  | 49.60                | 3.45  |
| GGKRAARPAT  | AGKAGGA AVVITEPEHTKER  | RCC2_HUMAN  |             |      | Protein RCC2;                                            | 0.22                            | 0.02                  | 39.20                | -0.80 |
| RSSRTNPETK  | SKVEDPEINSIQDIKEGQLLR  | RRP5_HUMAN  |             |      | Protein RRP5 homolog;                                    | 1.15                            | 0.07                  | 49.90                | 2.78  |
| GLQPLKLDYR  | ALAAVPSAGSVQR          | SCRIB_HUMAN |             |      | Protein scribble homolog;                                | 1.23                            | 0.12                  | 32.30                | 5.34  |
| VTTFVNHPQV  | SALLGEEDEEALHYLTR      | SET_HUMAN   |             |      | Protein SET;                                             | -1.04                           | 0.07                  | 33.00                | 0.66  |
| SLVISQGADG  | RGKPEVVS VVGR          | TUTLA_HUMAN |             |      | Protein turtle homolog A;                                | 0.18                            | 0.01                  | 23.50                | 1.70  |
| NIPPIQRVPR  | DIPAMLPAAR             | YIPF3_HUMAN |             |      | Protein YIPF3;                                           | 0.45                            | 0.02                  | 31.40                | 1.56  |
| MAWK        | SGGASHSELIHNLR         | PIMT_HUMAN  |             |      | Protein-L-isoaspartate(D-aspartate) O-methyltransferase; | 0.18                            | 0.02                  | 62.50                | 1.86  |
| PLQLCALVHC  | APPAAGQQPPREPPA APGAWR | LYOX_HUMAN  |             |      | Protein-lysine 6-oxidase;                                | 4.53                            | 0.20                  | 48.70                | 1.62  |
| SPWQV MLFRK | SPQELLCGASLISDR        | THRB_HUMAN  |             |      | Prothrombin;                                             | -0.07                           | 0.00                  | 68.30                | -0.65 |
| MSPWQV MLFR | KSPQELLCGASLISDR       | THRB_HUMAN  |             |      | Prothrombin;                                             | -0.21                           | 0.01                  | 60.40                | 1.25  |
| DTSSEITTKD  | LKEKKEVVEEAENGR        | PTMA_HUMAN  |             |      | Prothymosin alpha;                                       | -0.21                           | 0.02                  | 34.80                | 1.95  |
| GRLAHEVGWK  | YQAVTATLEEKR           | R13AX_HUMAN | RL13A_HUMAN |      | Putative 60S ribosomal                                   | -0.24                           | 0.02                  | 35.20                | 2.23  |
| YVSHMKETQK  | STYYITGESKEQVANS AFVER | H90B3_HUMAN |             |      | Putative heat shock protein HSP 90-beta-3;               | 2.51                            | 0.13                  | 48.40                | -4.45 |
| AKVNDTTPNN  | FPLLYEEALR             | MA13P_HUMAN | MAGB4_HUMAN |      | Putative MAGE domain-containing protein                  | 1.78                            | 0.14                  | 26.00                | 1.09  |
| MSAQ AQMR   | ALLDQLMG TAR           | LUC7L_HUMAN |             |      | Putative RNA-binding protein Luc7-like 1;                | -0.11                           | 0.01                  | 48.20                | 4.82  |



Table S6

| Non-prime  | Prime                      | Id 1        | Id 2       | Id 3 | Protein (Id1)                                              | Fold-change (log <sub>2</sub> ) | Fc standard deviation | X! Tandem hyperscore | ppm   |
|------------|----------------------------|-------------|------------|------|------------------------------------------------------------|---------------------------------|-----------------------|----------------------|-------|
| MSAQAQMR   | AMLDQLMGTSR                | LC7L2_HUMAN |            |      | Putative RNA-binding protein Luc7-like 2;                  | 0.09                            | 0.01                  | 36.60                | -1.19 |
| EGLMKVEAAR | LSAQDPVVAEADGR             | S38AA_HUMAN |            |      | Putative sodium-coupled neutral amino acid transporter 10; | 0.75                            | 0.04                  | 54.50                | 7.36  |
| MA         | ASGSPGPTSPGPGR             | YJ017_HUMAN |            |      | Putative uncharacterized protein LOC439951;                | 2.94                            | 0.21                  | 27.90                | 2.96  |
| RVVDDELATR | FLKSFKANLENPIR             | ODPX_HUMAN  |            |      | Pyruvate dehydrogenase protein X component,                | 6.45                            | 0.49                  | 24.30                | 1.93  |
| ADTFLEHMCR | LDIDSPPIR                  | KPYM_HUMAN  |            |      | Pyruvate kinase isozymes                                   | 8.04                            | 0.56                  | 52.20                | 3.18  |
| DIDSPPIR   | NTGIICTIGPASR              | KPYM_HUMAN  |            |      | Pyruvate kinase isozymes M1/M2;                            | 1.39                            | 0.09                  | 60.70                | 3.01  |
| SPLSYRPVAI | ALDTKGPEIR                 | KPYM_HUMAN  | KPYR_HUMAN |      | Pyruvate kinase isozymes M1/M2;                            | 0.93                            | 0.06                  | 25.10                | 2.42  |
| YHAETIKNVR | TATESFASDPILYR             | KPYM_HUMAN  |            |      | Pyruvate kinase isozymes M1/M2;                            | 0.59                            | 0.05                  | 67.40                | 4.50  |
| GTAFIQTQQL | HAAMADTFLEHMCR             | KPYM_HUMAN  |            |      | Pyruvate kinase isozymes                                   | 0.37                            | 0.02                  | 39.50                | 6.66  |
| VLGEKGKNIK | IISKIENHEGVR               | KPYM_HUMAN  |            |      | Pyruvate kinase isozymes                                   | 0.35                            | 0.04                  | 54.80                | 8.06  |
| SKIENHEGVR | RFDEILEASDGIMVAR           | KPYM_HUMAN  |            |      | Pyruvate kinase isozymes                                   | 0.22                            | 0.01                  | 50.90                | 6.40  |
| YHAETIKNVR | TATESFASDPILYRPVAVALDTKGPE | KPYM_HUMAN  |            |      | Pyruvate kinase isozymes                                   | 0.17                            | 0.00                  | 36.40                | 1.14  |
| TAFIQTQQLH | AAMADTFLEHMCR              | KPYM_HUMAN  |            |      | Pyruvate kinase isozymes                                   | -0.16                           | 0.01                  | 35.20                | 5.85  |
| TQQLHAAMAD | TFLEHMCR                   | KPYM_HUMAN  |            |      | Pyruvate kinase isozymes                                   | -0.24                           | 0.01                  | 27.70                | 2.48  |
| QTQQLHAAMA | DTFLEHMCR                  | KPYM_HUMAN  |            |      | Pyruvate kinase isozymes M1/M2;                            | -0.26                           | 0.02                  | 29.20                | 1.12  |
| GAVEASFKCC | SGAIIVLTKSGR               | KPYM_HUMAN  |            |      | Pyruvate kinase isozymes M1/M2;                            | -1.72                           | 0.23                  | 32.10                | 4.56  |
| KPIEEIIVQN | GKVIGVKSEGEIAR             | GDIB_HUMAN  |            |      | Rab GDP dissociation                                       | -0.69                           | 0.07                  | 30.30                | 2.91  |
| QDQTTVRTVA | SATTAIEIR                  | REPS1_HUMAN |            |      | RalBP1-associated Eps domain-containing protein            | 0.04                            | 0.01                  | 33.40                | 2.41  |
| LFKMRAKLF  | FASENDLPEWKER              | RANG_HUMAN  |            |      | Ran-specific GTPase-                                       | 0.30                            | 0.02                  | 35.40                | 2.14  |
| SDRAWVWNTH | ADFADECPPELLAIR            | RANG_HUMAN  |            |      | Ran-specific GTPase-                                       | -1.29                           | 0.10                  | 29.00                | -1.42 |
| SAAEVDGLG  | VARPHYGSVLDNER             | IQGA1_HUMAN |            |      | Ras GTPase-activating-like protein IQGAP1;                 | 0.17                            | 0.01                  | 34.80                | 1.88  |

Table S6

| Non-prime  | Prime                  | Id 1        | Id 2        | Id 3        | Protein (Id1)                                      | Fold-change (log <sub>2</sub> ) | Fc standard deviation | X! Tandem hyperscore | ppm   |
|------------|------------------------|-------------|-------------|-------------|----------------------------------------------------|---------------------------------|-----------------------|----------------------|-------|
| MSAADEVD   | GLGVARPHYGSVLDNER      | IQGA1_HUMAN |             |             | Ras GTPase-activating-like protein IQGAP1;         | -0.40                           | 0.04                  | 55.50                | 1.23  |
| WDTAGQERFW | TITSSYYR               | RAB1A_HUMAN | RAB1B_HUMAN | RAB1C_HUMAN | Ras-related protein Rab-                           | 0.87                            | 0.10                  | 34.80                | 3.92  |
| VNKKFSNQYK | ATIGADFLTKEVMVDDR      | RAB7A_HUMAN |             |             | Ras-related protein Rab-7a;                        | 0.31                            | 0.01                  | 37.40                | 7.12  |
| LQDLREQILR | VKDTDDVPMILVGNKCDLEDER | RAP1B_HUMAN | RP1BL_HUMAN |             | Ras-related protein Rap-1b;                        | 0.59                            | 0.04                  | 54.70                | 1.95  |
| LALLPPGAAS | TQVCTGTDMKLR           | ERBB2_HUMAN |             |             | Receptor tyrosine-protein                          | 0.85                            | 0.08                  | 42.40                | -2.09 |
| TKEDEMPVGR | NVLELSNVVR             | PTPRF_HUMAN |             |             | Receptor-type tyrosine-                            | 2.17                            | 0.24                  | 47.70                | 5.97  |
| GGLGGSGGLR | LLLCLLLSSR             | PTPRN_HUMAN |             |             | Receptor-type tyrosine-protein phosphatase-like N; | 6.01                            | 0.52                  | 23.00                | 0.60  |
| VPGKVELQEK | VVQVSAGDSHTAALTDDGR    | RCC1_HUMAN  |             |             | Regulator of chromosome condensation;              | 0.57                            | 0.06                  | 71.10                | 0.52  |
| AASGASSALE | AGGSSGLEDVPLLQQADELHR  | RMD3_HUMAN  |             |             | Regulator of microtubule dynamics protein 3;       | -1.00                           | 0.12                  | 70.70                | 5.81  |
| VEKITTLLK  | AGAKPDQIGIHPYEGQR      | RENT1_HUMAN |             |             | Regulator of nonsense                              | 1.02                            | 0.08                  | 30.40                | 5.63  |
| LLALVAGVLG | NEFSILKSPGSVVFR        | RENH_HUMAN  |             |             | Renin receptor;                                    | 0.90                            | 0.01                  | 34.00                | 7.31  |
| LALVAGVLGN | EFNILKSPGSVVFR         | RENH_HUMAN  |             |             | Renin receptor;                                    | 0.60                            | 0.02                  | 29.40                | 8.37  |
| MLPRDERRFK | AADLNGDLTATR           | RCN1_HUMAN  |             |             | Reticulocalbin-1;                                  | -0.07                           | 0.00                  | 48.00                | 0.00  |
| LLCAAAGA   | GKAEELHYPLGER          | RCN2_HUMAN  |             |             | Reticulocalbin-2;                                  | 1.26                            | 0.09                  | 44.80                | 1.72  |
| SVNYKPPAQK | SIQEIQELDKDDESLR       | GDIR1_HUMAN |             |             | Rho GDP-dissociation inhibitor 1;                  | 0.13                            | 0.01                  | 47.10                | -0.05 |
| KDDESLIKYK | KTLLGDGPVVTDPKAPNVVVTR | GDIR2_HUMAN |             |             | Rho GDP-dissociation                               | -0.24                           | 0.01                  | 34.10                | -1.81 |
| MWDQ       | RLVKLALLQHLR           | RHGBB_HUMAN |             |             | Rho GTPase-activating protein 11B;                 | 4.19                            | 0.53                  | 14.70                | 9.02  |

Table S6

| Non-prime  | Prime                  | Id 1        | Id 2        | Id 3 | Protein (Id1)                         | Fold-change (log <sub>2</sub> ) | Fc standard deviation | X! Tandem hyperscore | ppm   |
|------------|------------------------|-------------|-------------|------|---------------------------------------|---------------------------------|-----------------------|----------------------|-------|
| EKEEDARPNA | AAPALGPVGLSDLSKVR      | RHG27_HUMAN |             |      | Rho GTPase-activating protein 27;     | -0.26                           | 0.01                  | 26.40                | 3.41  |
| FQEPTEPKTK | AAAPGVEDEPLLR          | RIR2_HUMAN  |             |      | Ribonucleoside-diphosphate reductase  | 1.85                            | 0.19                  | 55.30                | 7.76  |
| EKAQEQQQQM | AELHSKLOSSEAEVR        | RRBP1_HUMAN |             |      | Ribosome-binding protein 1;           | -0.83                           | 0.09                  | 33.30                | 2.05  |
| KQGQEVPPR  | RGPAVPPAR              | REXO1_HUMAN |             |      | RNA exonuclease 1 homolog;            | -1.40                           | 0.11                  | 22.00                | 7.74  |
|            | M VKLFIGNLPR           | RBM4B_HUMAN | RBM4_HUMAN  |      | RNA-binding protein 4B;               | 0.93                            | 0.02                  | 41.10                | 1.65  |
| SAKAAIDWFD | GKEFSGNPIKVSFATR       | FUS_HUMAN   |             |      | RNA-binding protein                   | -1.65                           | 0.05                  | 30.80                | 1.74  |
| ARQRSRAWLK | EGGGDEPLNFLDPKVAQR     | RRP12_HUMAN |             |      | RRP12-like protein;                   | 1.04                            | 0.03                  | 28.80                | 1.99  |
|            | M KIEEVKSTTKTQR        | RUVB1_HUMAN |             |      | RuvB-like 1;                          | 0.76                            | 0.06                  | 24.70                | 3.52  |
| LGLDDALEPR | QASQGMVGLAAR           | RUVB2_HUMAN |             |      | RuvB-like 2;                          | 1.04                            | 0.08                  | 40.80                | 4.83  |
| LKNLFSKYGK | VVGAKVVTNAR            | SAFB1_HUMAN | SAFB2_HUMAN |      | Scaffold attachment factor B1;        | 0.43                            | 0.04                  | 40.80                | 3.08  |
| ESTAHAQSSK | ADSL LAVVKR            | SAFB1_HUMAN | SAFB2_HUMAN |      | Scaffold attachment factor B1;        | 0.26                            | 0.02                  | 30.50                | 2.30  |
| KHDKKGNKED | YDLSKMR                | SCG3_HUMAN  |             |      | Secretogranin-3;                      | -6.06                           | 0.00                  | 18.60                | 2.55  |
| VIQHRPSRQY | ATLDVYNPFETR           | SCAM3_HUMAN |             |      | Secretory carrier-associated membrane | 0.15                            | 0.01                  | 48.00                | 2.53  |
| VKGSSQPQAR | VYLTFDEL R             | SEM3C_HUMAN |             |      | Semaphorin-3C;                        | 2.96                            | 0.18                  | 34.10                | 2.62  |
| AARLWGLGIG | AEVWWNLVPR             | SEM4C_HUMAN |             |      | Semaphorin-4C;                        | 0.86                            | 0.04                  | 45.00                | 3.08  |
| LLLLLGAHG  | LFPEEPPPLSVAPR         | SEM6B_HUMAN |             |      | Semaphorin-6B;                        | 2.51                            | 0.04                  | 44.50                | 4.94  |
| KRENIRSLTM | SGHVG FESLPDQLVNR      | SEP10_HUMAN |             |      | Septin-10;                            | -1.00                           | 0.08                  | 42.60                | -2.79 |
| INPETPGYVG | FANLPNQVHR             | SEPT2_HUMAN |             |      | Septin-2;                             | -0.07                           | 0.01                  | 37.70                | 2.84  |
| EERSVNSSTM | VAQQKNLEGYVGFANLPNQVYR | SEPT7_HUMAN |             |      | Septin-7;                             | -0.02                           | 0.00                  | 75.80                | 3.00  |

Table S6

| Non-prime  | Prime                | Id 1        | Id 2       | Id 3       | Protein (Id1)                                        | Fold-change (log <sub>2</sub> ) | Fc standard deviation | X! Tandem hyperscore | ppm   |
|------------|----------------------|-------------|------------|------------|------------------------------------------------------|---------------------------------|-----------------------|----------------------|-------|
| PAPVSQLQSR | LEPKQPQPPVAEATPR     | SEPT9_HUMAN |            |            | Septin-9;                                            | 1.18                            | 0.04                  | 39.70                | 2.41  |
| AIGPSRFGLK | RAEVLGHKTPEPAPR      | SEPT9_HUMAN |            |            | Septin-9;                                            | 0.57                            | 0.02                  | 31.40                | 3.82  |
| SVAAALSPLG | IEVDIDVEHGGKR        | SQSTM_HUMAN |            |            | Sequestosome-1;                                      | 0.64                            | 0.06                  | 32.20                | 2.73  |
| AIGSPFSLQN | TVTTGIVSTTQR         | HTRA1_HUMAN |            |            | Serine protease HTRA1;                               | 1.83                            | 0.29                  | 68.10                | -4.10 |
| ASAQLSRAGR | SAPLAAGCPDR          | HTRA1_HUMAN |            |            | Serine protease HTRA1;                               | 0.81                            | 0.03                  | 48.80                | -1.92 |
| IRETQEKRFK | DPGLVDQLVKADSEWR     | SYSC_HUMAN  |            |            | Serine--tRNA ligase, cytoplasmic;                    | 0.80                            | 0.03                  | 41.90                | 2.58  |
|            | M VLDLDFLR           | SYSC_HUMAN  |            |            | Serine--tRNA ligase, cytoplasmic;                    | 0.18                            | 0.00                  | 25.90                | 0.78  |
| ISGHTSGIKK | ALWCSEDKQILSADDKTVR  | STRAP_HUMAN |            |            | Serine-threonine kinase receptor-associated protein; | 0.51                            | 0.04                  | 35.90                | 1.67  |
| LPVQPEVALK | RVPSPTPAPKEAVR       | SRRM2_HUMAN |            |            | Serine/arginine repetitive matrix protein 2;         | 1.02                            | 0.08                  | 33.90                | 1.40  |
| AAAMNLSAPR | TAVAPSAVNLADPR       | SRRM2_HUMAN |            |            | Serine/arginine repetitive matrix protein 2;         | 0.33                            | 0.03                  | 36.70                | 3.18  |
| DERGGEGDGR | IYVGNLPTDVR          | SRSF9_HUMAN |            |            | Serine/arginine-rich splicing factor 9;              | 3.70                            | 0.18                  | 35.80                | 2.67  |
| DEIKAHPFFK | TIDFSSDLR            | LATS1_HUMAN |            |            | Serine/threonine-protein kinase LATS1;               | -0.26                           | 0.01                  | 27.20                | 1.20  |
| LLNAPTKRPR | SSTVTEAPIAVVTSR      | NEK9_HUMAN  |            |            | Serine/threonine-protein kinase Nek9;                | 1.42                            | 0.15                  | 72.10                | 4.77  |
| LPYEELQGLK | VASEAPLEHKPQVEASSPR  | NEK9_HUMAN  |            |            | Serine/threonine-protein kinase Nek9;                | 0.86                            | 0.07                  | 47.50                | 1.72  |
| YEELQGLKVA | SEAPLEHKPQVEASSPR    | NEK9_HUMAN  |            |            | Serine/threonine-protein kinase Nek9;                | 0.22                            | 0.03                  | 33.10                | -0.26 |
| EPAKTAQALS | SGSGSQETKIPISLVLR    | OXR1_HUMAN  |            |            | Serine/threonine-protein kinase OSR1;                | 0.60                            | 0.03                  | 32.70                | 4.97  |
| LPVTPTRDVA | TSPISPTEENNTTPPDALTR | PAK1_HUMAN  |            |            | Serine/threonine-protein kinase PAK1;                | -0.26                           | 0.03                  | 55.00                | 8.06  |
| AAYFDSARLR | AAGIGKDFKENPNLR      | PRP4B_HUMAN |            |            | Serine/threonine-protein kinase PRP4 homolog;        | 0.81                            | 0.06                  | 27.20                | 4.73  |
| ILYQTVTGLK | KDLSGVQKVPALLENQVEER | RIOK1_HUMAN |            |            | Serine/threonine-protein kinase RIOK1;               | 0.94                            | 0.03                  | 38.00                | 1.50  |
| SHEPEFDYLK | SLEIEEKINKIR         | 2ABA_HUMAN  | 2ABB_HUMAN | 2ABD_HUMAN | Serine/threonine-protein kinase 2ABD_HUMAN;          | -0.04                           | 0.00                  | 26.60                | 4.44  |

Table S6

| Non-prime  | Prime                    | Id 1        | Id 2        | Id 3 | Protein (Id1)                                    | Fold-change (log <sub>2</sub> ) | Fc standard deviation | X! Tandem hyperscore | ppm   |
|------------|--------------------------|-------------|-------------|------|--------------------------------------------------|---------------------------------|-----------------------|----------------------|-------|
| MAP        | LDLDKYVEIAR              | PPP6_HUMAN  |             |      | Serine/threonine-protein phosphatase 6 catalytic | 0.96                            | 0.06                  | 21.20                | 1.01  |
| M          | APLDLDKYVEIAR            | PPP6_HUMAN  |             |      | Serine/threonine-protein phosphatase 6 catalytic | 0.35                            | 0.03                  | 13.90                | 0.89  |
| MFWK       | FDLHSSSHIDTLER           | PP6R3_HUMAN |             |      | Serine/threonine-protein                         | 0.48                            | 0.02                  | 30.20                | 2.83  |
| NKCVPSNER  | YYGYTGAFR                | TRFE_HUMAN  | TRFL_HUMAN  |      | Serotransferrin;                                 | 2.28                            | 0.14                  | 25.10                | 2.57  |
| AEGHSEASLA | SALVEGEIAEEAAEKATSR      | SDPR_HUMAN  |             |      | Serum deprivation-response protein;              | 1.10                            | 0.05                  | 55.10                | 3.94  |
| SNHQKISSGK | SSPFKVSPLTFGR            | SDPR_HUMAN  |             |      | Serum deprivation-response protein;              | 1.00                            | 0.05                  | 29.90                | -1.49 |
| FAEGHSEASL | ASALVEGEIAEEAAEKATSR     | SDPR_HUMAN  |             |      | Serum deprivation-                               | 0.59                            | 0.04                  | 43.70                | 1.62  |
| EESFAEGHSE | ASLASALVEGEIAEEAAEKATSR  | SDPR_HUMAN  |             |      | Serum deprivation-response protein;              | 0.45                            | 0.03                  | 43.50                | 6.69  |
| EGHSEASLAS | ALVEGEIAEEAAEKATSR       | SDPR_HUMAN  |             |      | Serum deprivation-                               | 0.38                            | 0.03                  | 35.10                | 3.50  |
| EEESFAEGHS | EASLASALVEGEIAEEAAEKATSR | SDPR_HUMAN  |             |      | Serum deprivation-response protein;              | -0.40                           | 0.05                  | 47.70                | 2.16  |
| INGSAPRDLF | DMKPFEDALR               | SHC1_HUMAN  |             |      | SHC-transforming protein 1;                      | -0.11                           | 0.01                  | 28.60                | 0.70  |
| DMKPFEDALR | VPPPPQSVSMAEQLR          | SHC1_HUMAN  |             |      | SHC-transforming protein 1;                      | -0.43                           | 0.04                  | 31.60                | 3.11  |
| RLISLFTANS | HLGPLQISLGR              | TRPC4_HUMAN | TRPC5_HUMAN |      | Short transient receptor                         | 4.16                            | 0.47                  | 25.10                | 5.65  |
| RHITLDKTKW | GSDHSASLEPGELAEQVR       | SIAS_HUMAN  |             |      | Sialic acid synthase;                            | 0.04                            | 0.00                  | 41.40                | 4.15  |
| SEQDLEKLG  | KSPPPPPPPR               | SKT_HUMAN   |             |      | Sickle tail protein homolog;                     | 8.47                            | 1.37                  | 49.00                | 3.76  |
| M          | VLLESEQFLTELTR           | SRP14_HUMAN |             |      | Signal recognition particle 14 kDa protein;      | 0.02                            | 0.00                  | 76.40                | 3.57  |
| EVNSDAGAFK | NSLKDLPDVQELITQVR        | SRP68_HUMAN |             |      | Signal recognition particle                      | 1.51                            | 0.14                  | 49.20                | 8.04  |
| EQRQQSTTLS | TLYPSTSSLLTNHQHEGR       | STAM1_HUMAN |             |      | Signal transducing adapter molecule 1;           | -0.72                           | 0.06                  | 36.70                | 2.26  |

Table S6

| Non-prime   | Prime                | Id 1        | Id 2 | Id 3 | Protein (Id1)                                 | Fold-change (log <sub>2</sub> ) | Fc standard deviation | X! Tandem hyperscore | ppm   |
|-------------|----------------------|-------------|------|------|-----------------------------------------------|---------------------------------|-----------------------|----------------------|-------|
| LQVLRQFVRH  | ESETTTSVLER          | SSBP_HUMAN  |      |      | Single-stranded DNA-binding protein,          | 0.20                            | 0.02                  | 54.70                | 3.50  |
| PGKSSILQHE  | RPASLYQSSIDR         | SRBS2_HUMAN |      |      | Sorbin and SH3 domain-                        | -6.06                           | 0.00                  | 32.60                | 5.18  |
| IAPRIESKSM  | SAPVIFDR             | SNX2_HUMAN  |      |      | Sorting nexin-2;                              | -0.40                           | 0.03                  | 33.60                | 2.13  |
| VKKIHENEKR  | LEAGDHPVELLAR        | SPRC_HUMAN  |      |      | SPARC;                                        | 0.45                            | 0.03                  | 41.70                | 1.52  |
| FGQLDQHPIID | GYLSHTELAFLR         | SPRC_HUMAN  |      |      | SPARC;                                        | -0.52                           | 0.03                  | 34.60                | -0.86 |
| IAALQAFADQ  | LIAAGHYAKGDISSR      | SPTA2_HUMAN |      |      | Spectrin alpha chain, non-                    | -0.62                           | 0.05                  | 32.50                | 2.70  |
| VQEEKIAALQ  | AFADQLIAAGHYAKGDISSR | SPTA2_HUMAN |      |      | Spectrin alpha chain, non-erythrocytic 1;     | -0.76                           | 0.06                  | 55.20                | 1.30  |
| AALQAFADQL  | IAAGHYAKGDISSR       | SPTA2_HUMAN |      |      | Spectrin alpha chain, non-                    | -0.88                           | 0.08                  | 23.10                | 2.99  |
| ETDIAAYEER  | VQAVVAVAR            | SPTB2_HUMAN |      |      | Spectrin beta chain, non-                     | 1.36                            | 0.15                  | 25.80                | 2.76  |
| PSPTSDRKAK  | TALPAQSAATLPAR       | SPTB2_HUMAN |      |      | Spectrin beta chain, non-erythrocytic 1;      | 0.13                            | 0.01                  | 63.10                | 2.07  |
| EEYWNSKFK   | AFTFDDDELSQLKESKR    | VIPAR_HUMAN |      |      | Spermatogenesis-defective protein 39          | 0.72                            | 0.07                  | 44.80                | -0.88 |
| ATPTPGHIMS  | MTPEQLQAWR           | SF3B1_HUMAN |      |      | Splicing factor 3B subunit 1;                 | -0.88                           | 0.05                  | 40.60                | 1.24  |
| KEHELLEQK   | RAAVLLEQER           | SF3B2_HUMAN |      |      | Splicing factor 3B subunit 2;                 | 0.81                            | 0.06                  | 32.10                | 4.53  |
| QAKSQRTKQS  | TVLAPVIDLKR          | SPF45_HUMAN |      |      | Splicing factor 45;                           | 1.55                            | 0.12                  | 32.30                | 1.09  |
| LPTMTPDGLA  | VTPTVPVVGSMTR        | U2AF2_HUMAN |      |      | Splicing factor U2AF 65 kDa subunit;          | -0.14                           | 0.01                  | 42.60                | 2.37  |
| TALLPTMTPD  | GLAVTPTVPVVGSMTR     | U2AF2_HUMAN |      |      | Splicing factor U2AF 65 kDa subunit;          | -1.29                           | 0.10                  | 71.30                | 3.69  |
| GEKTYTQRCR  | LFVGNLPADITEDEFKR    | SFPQ_HUMAN  |      |      | Splicing factor, proline- and glutamine-rich; | 2.03                            | 0.12                  | 31.90                | 4.30  |
| VKASFAPISF  | AIKAKENDLLPLEKNR     | SFSWA_HUMAN |      |      | Splicing factor, suppressor                   | -1.04                           | 0.13                  | 39.00                | 2.31  |
| YGVQADRVDK  | SAVGFDYQGKTEKHESQR   | SRC8_HUMAN  |      |      | Src substrate cortactin;                      | 0.68                            | 0.05                  | 29.30                | 3.27  |
| RPAKPPVVDK  | SLKPGALSNSESIPTIDGLR | STABP_HUMAN |      |      | STAM-binding protein;                         | -1.00                           | 0.06                  | 40.40                | 3.15  |

Table S6

| Non-prime  | Prime                  | Id 1        | Id 2 | Id 3 | Protein (Id1)                      | Fold-change (log <sub>2</sub> ) | Fc standard deviation | X! Tandem hyperscore | ppm   |
|------------|------------------------|-------------|------|------|------------------------------------|---------------------------------|-----------------------|----------------------|-------|
| KLNVCIAKR  | NPEAITEVVQLPNHFSNR     | STC1_HUMAN  |      |      | Stanniocalcin-1;                   | 4.68                            | 0.44                  | 47.90                | 5.06  |
| ELEKRASGQA | FELILSPR               | STMN1_HUMAN |      |      | Stathmin;                          | -0.80                           | 0.03                  | 26.70                | 2.58  |
| FNDSQRQATK | DAGQISGLNVLR           | GRP75_HUMAN |      |      | Stress-70 protein, mitochondrial;  | 1.28                            | 0.14                  | 54.70                | 2.03  |
| YTKAMDVYQK | ALDLSSCKEAADGYQR       | STIP1_HUMAN |      |      | Stress-induced-                    | 0.11                            | 0.01                  | 32.80                | 1.84  |
| AGLTVANEAD | SLTYDIANNKDALR         | STRN_HUMAN  |      |      | Striatin;                          | -1.96                           | 0.23                  | 33.20                | -0.97 |
| FSNNHPGAGG | AKGLGPLAEAAAAGDGAAAAGA | STRN_HUMAN  |      |      | Striatin;                          | -3.46                           | 0.00                  | 36.70                | -0.34 |
| SQHKGVAVRR | VLNTEANVVR             | QSOX1_HUMAN |      |      | Sulfhydryl oxidase 1;              | 10.56                           | 0.00                  | 47.50                | 2.19  |
| KRQKRNKIPY | SFFKTALDDR             | QSOX1_HUMAN |      |      | Sulfhydryl oxidase 1;              | 3.08                            | 0.22                  | 29.20                | 1.27  |
| PLGQWHLSCR | DTGAALLAESR            | QSOX1_HUMAN |      |      | Sulfhydryl oxidase 1;              | 2.13                            | 0.16                  | 55.60                | 2.47  |
| GPLEVRRVGR | SSKQLVDIPEGQLEAR       | QSOX1_HUMAN |      |      | Sulfhydryl oxidase 1;              | 2.03                            | 0.19                  | 61.40                | 1.75  |
| ANAAPRSALY | SPSDPLTLLQADTVR        | QSOX1_HUMAN |      |      | Sulfhydryl oxidase 1;              | 1.72                            | 0.07                  | 42.10                | -2.38 |
| AVPGANAAPR | SALYSPSDPLTLLQADTVR    | QSOX1_HUMAN |      |      | Sulfhydryl oxidase 1;              | 1.48                            | 0.21                  | 113.30               | 4.24  |
| LAVPGANAAP | RSALYSPSDPLTLLQADTVR   | QSOX1_HUMAN |      |      | Sulfhydryl oxidase 1;              | 1.35                            | 0.05                  | 80.90                | 3.49  |
| VRRVGRSSKQ | LVDIPEGQLEAR           | QSOX1_HUMAN |      |      | Sulfhydryl oxidase 1;              | 1.24                            | 0.12                  | 43.10                | 3.21  |
| GFHVHEFGDN | TAGCTSAGPHFNPLSR       | SODC_HUMAN  |      |      | Superoxide dismutase [Cu-Zn];      | 1.03                            | 0.05                  | 28.80                | -1.81 |
| LLLGALSGWA | ASDDPIEKVIEGINR        | SBSN_HUMAN  |      |      | Suprabasin;                        | 3.69                            | 0.18                  | 34.80                | -0.35 |
| SEDVSNKVSM | SSTVQGSNIFER           | SDC4_HUMAN  |      |      | Syndecan-4;                        | 1.50                            | 0.09                  | 47.60                | 1.99  |
| LFFVGGVAES | IRETEVIDPQDLLEGR       | SDC4_HUMAN  |      |      | Syndecan-4;                        | 1.25                            | 0.07                  | 69.20                | 3.49  |
| GLSLNEEEIR | ANVAVVSGAPLQGQLVAR     | SDCB1_HUMAN |      |      | Syntenin-1;                        | 3.53                            | 0.36                  | 41.60                | 6.74  |
| LVARPSSINY | MVAPVTGNDVGIR          | SDCB1_HUMAN |      |      | Syntenin-1;                        | 0.50                            | 0.06                  | 53.50                | 5.43  |
| FARSLLVIPN | TLAVNAAQDSTDVAKLR      | TCPA_HUMAN  |      |      | T-complex protein 1 subunit alpha; | 0.96                            | 0.07                  | 47.30                | -1.13 |
| MASLS      | LAPVNIFKAGADEER        | TCPB_HUMAN  |      |      | T-complex protein 1                | 0.00                            | 0.00                  | 33.20                | 2.94  |

Table S6

| Non-prime  | Prime                    | Id 1        | Id 2 | Id 3 | Protein (Id1)                          | Fold-change (log <sub>2</sub> ) | Fc standard deviation | X! Tandem hyperscore | ppm   |
|------------|--------------------------|-------------|------|------|----------------------------------------|---------------------------------|-----------------------|----------------------|-------|
| NKLVIEEAER | SIHDALCVIR               | TCPD_HUMAN  |      |      | T-complex protein 1 subunit delta;     | 0.20                            | 0.01                  | 35.60                | 1.24  |
| DTEPLIQTAK | TTLGSKVVNSCHR            | TCPE_HUMAN  |      |      | T-complex protein 1 subunit epsilon;   | 0.79                            | 0.07                  | 33.70                | 2.55  |
| MTGVEQWPYR | AVAQALEVIPR              | TCPG_HUMAN  |      |      | T-complex protein 1 subunit gamma;     | 0.87                            | 0.06                  | 52.30                | 5.16  |
| LVCCSAKNLR | DIDEVSSLLR               | TCPQ_HUMAN  |      |      | T-complex protein 1 subunit theta;     | 2.42                            | 0.23                  | 48.00                | 4.68  |
| KAPGFAQMLK | EGAKHFSGLEEAAYR          | TCPQ_HUMAN  |      |      | T-complex protein 1                    | 0.57                            | 0.05                  | 29.60                | 0.40  |
| VGDTQVVVFK | HEKEDGAISTIVLR           | TCPQ_HUMAN  |      |      | T-complex protein 1 subunit theta;     | 0.50                            | 0.04                  | 47.90                | 1.22  |
| TVSRTPCDPD | LPYICTAQNPVSQR           | LY9_HUMAN   |      |      | T-lymphocyte surface                   | 4.69                            | 0.39                  | 26.40                | -0.18 |
| TMLEDSVSPK | KSTVLQQQYNR              | TLN1_HUMAN  |      |      | Talin-1;                               | 0.59                            | 0.05                  | 31.20                | 1.60  |
| IVISAKTMLE | SAGGLIQTAR               | TLN1_HUMAN  |      |      | Talin-1;                               | 0.30                            | 0.02                  | 39.60                | 0.69  |
| LREAAEGLRM | ATNAAAQNAIKKKLVQR        | TLN1_HUMAN  |      |      | Talin-1;                               | 0.24                            | 0.01                  | 25.50                | 3.61  |
| VANSTANLVK | TIKALDGAFTEENR           | TLN1_HUMAN  |      |      | Talin-1;                               | -0.14                           | 0.01                  | 39.50                | -5.93 |
| ASGPENFQVG | SMPPAQQQITSGQMHR         | TLN1_HUMAN  |      |      | Talin-1;                               | -0.62                           | 0.02                  | 43.90                | -0.38 |
| LEAVDNLSAF | ASNPEFSSIPAQISPEGR       | TLN1_HUMAN  |      |      | Talin-1;                               | -1.24                           | 0.12                  | 79.70                | 6.50  |
| AVAHALHSLL | GCDKSTCTKR               | TS1R2_HUMAN |      |      | Taste receptor type 1 member 2;        | 5.85                            | 0.24                  | 14.80                | 3.01  |
| PSRTAPGALT | AKPPLAPKPGTTVASGV TAR    | TB10B_HUMAN |      |      | TBC1 domain family member 10B;         | -0.07                           | 0.00                  | 27.30                | -0.35 |
| QYKDRDGQPQ | VVPVEGSLR                | TENX_HUMAN  |      |      | Tenascin-X;                            | 6.85                            | 0.67                  | 24.10                | 2.84  |
| VKGCTAMIGC | RLMSGILAVGPMFVR          | TX101_HUMAN |      |      | Testis-expressed sequence 101 protein; | -1.87                           | 0.14                  | 25.70                | -0.06 |
| PAACAGDMAD | AASPCSVVNDLR             | THOP1_HUMAN |      |      | Thimet oligopeptidase;                 | -0.88                           | 0.05                  | 60.80                | -0.08 |
|            | M VGVKPVGSDPDFQPELSGAGSR | TXNL1_HUMAN |      |      | Thioredoxin-like protein               | 0.15                            | 0.01                  | 89.10                | 2.97  |
|            | RTIYTTRISL               | THIOM_HUMAN |      |      | Thioredoxin,                           | -0.19                           | 0.02                  | 71.50                | 2.84  |



Table S6

| Non-prime  | Prime                   | Id 1        | Id 2        | Id 3 | Protein (Id1)                                | Fold-change (log <sub>2</sub> ) | Fc standard deviation | X! Tandem hyperscore | ppm   |
|------------|-------------------------|-------------|-------------|------|----------------------------------------------|---------------------------------|-----------------------|----------------------|-------|
| M          | SPTPLFLSLPEAR           | THOC1_HUMAN |             |      | THO complex subunit 1;                       | -0.52                           | 0.03                  | 44.70                | 0.55  |
| RLADFGVLHR | NELSGALTGLTR            | SYTC_HUMAN  |             |      | Threonine--tRNA ligase, cytoplasmic;         | 1.96                            | 0.11                  | 36.70                | 7.61  |
| IKALKIHKNS | STYWEGKADMETLQR         | SYTC_HUMAN  |             |      | Threonine--tRNA ligase,                      | -1.09                           | 0.07                  | 28.70                | -2.07 |
| SMVLELRGLR | TIVTTLQDSIR             | TSP1_HUMAN  |             |      | Thrombospondin-1;                            | 1.15                            | 0.10                  | 40.10                | 5.64  |
| VFLFMHVCCT | NRIPESGGDNSVFDIFELTGAAR | TSP1_HUMAN  |             |      | Thrombospondin-1;                            | -0.88                           | 0.08                  | 76.80                | 2.00  |
| LLLLCFFTSA | SQDLQVIDLLTVGESR        | TSP3_HUMAN  |             |      | Thrombospondin-3;                            | 4.63                            | 0.90                  | 90.60                | 2.55  |
| GAKGDFPTGK | SSFSITR                 | TR150_HUMAN |             |      | Thyroid hormone receptor-                    | 0.04                            | 0.00                  | 21.00                | 0.36  |
| RMGATPTPFK | STGDIAGTVVPETNKEPR      | ZO2_HUMAN   |             |      | Tight junction protein ZO-                   | 0.20                            | 0.01                  | 40.60                | 4.43  |
| GEGGAYTDNE | LDEPAEEPLVSSITR         | ZO2_HUMAN   |             |      | Tight junction protein ZO-2;                 | -0.34                           | 0.03                  | 51.40                | 4.20  |
| TRDNANRIIK | TTLQKEKPDFCFLEEDPGICR   | TFPI1_HUMAN |             |      | Tissue factor pathway inhibitor;             | 0.98                            | 0.05                  | 67.60                | 0.53  |
| IHARFRRGAR | SYQVICR                 | TPA_HUMAN   |             |      | Tissue-type plasminogen activator;           | 1.76                            | 0.10                  | 31.10                | 0.94  |
| ISKKTVRSIQ | EAPVSEDLVIR             | TOIP1_HUMAN |             |      | Torsin-1A-interacting                        | 1.53                            | 0.17                  | 37.50                | 1.59  |
| SQTISKKTVR | SIQEAPVSEDLVIR          | TOIP1_HUMAN |             |      | Torsin-1A-interacting protein 1;             | -0.21                           | 0.03                  | 58.20                | 6.47  |
| LLGLVSAAAA | AWDLASLR                | TOR2A_HUMAN | TOR2X_HUMAN |      | Torsin-2A;                                   | 2.69                            | 0.19                  | 29.30                | 2.81  |
| PSQMDVELVS | GSPVALSPQPR             | TOX4_HUMAN  |             |      | TOX high mobility group box family member 4; | 0.06                            | 0.01                  | 45.20                | 0.62  |
| M          | QLTHQLDLFPECR           | TPRKB_HUMAN |             |      | TP53RK-binding protein;                      | 0.51                            | 0.01                  | 44.40                | 1.05  |
| LELNQMRAFK | SSATGSVFTGKAVR          | PRCM_HUMAN  |             |      | Trans-L-3-hydroxyproline dehydratase;        | 1.20                            | 0.09                  | 29.60                | 1.32  |
| RGGTRGQEPQ | MKETIMNQEKLAKLQAQVR     | BTF3_HUMAN  |             |      | Transcription factor                         | 1.08                            | 0.08                  | 35.40                | 0.80  |

Table S6

| Non-prime  | Prime                    | Id 1        | Id 2 | Id 3 | Protein (Id1)                              | Fold-change (log <sub>2</sub> ) | Fc standard deviation | X! Tandem hyperscore | ppm  |
|------------|--------------------------|-------------|------|------|--------------------------------------------|---------------------------------|-----------------------|----------------------|------|
| TLPGGLLAPG | GNSMASGVGVGAGLGAGVNQR    | SOX2_HUMAN  |      |      | Transcription factor SOX-                  | 0.33                            | 0.02                  | 37.20                | 1.64 |
| FAQDVGRMFK | QFNKLTEDKADVQSIIGLQR     | TIF1B_HUMAN |      |      | Transcription intermediary factor 1-beta;  | 0.35                            | 0.01                  | 45.50                | 2.66 |
| TADSQPPVFK | VFPGSTTEDYNLIVIER        | TIF1B_HUMAN |      |      | Transcription intermediary factor 1-       | -0.37                           | 0.01                  | 55.70                | 3.22 |
| EGPETKPVLM | ALAEGPGAEGPR             | TIF1B_HUMAN |      |      | Transcription                              | -0.43                           | 0.02                  | 37.20                | 0.52 |
| AASASASAAA | SSPAGGGAEALLEHCGVCR      | TIF1B_HUMAN |      |      | Transcription intermediary factor 1-       | -0.83                           | 0.03                  | 49.20                | 3.99 |
| LTADSQPPVF | KVFPGSTTEDYNLIVIER       | TIF1B_HUMAN |      |      | Transcription                              | -1.00                           | 0.02                  | 67.80                | 3.53 |
| PSGSTSSGLE | VVAPEGTSAPGGPGTLDDSATICE | TIF1B_HUMAN |      |      | Transcription                              | -1.00                           | 0.10                  | 37.50                | 8.34 |
| EAAIGAPPTA | TEGPETKPVLMALAEGPGAEGPR  | TIF1B_HUMAN |      |      | Transcription intermediary factor 1-       | -1.14                           | 0.03                  | 73.10                | 2.99 |
| AAASASASAA | ASSPAGGGAEALLEHCGVCR     | TIF1B_HUMAN |      |      | Transcription                              | -1.19                           | 0.11                  | 43.60                | 0.92 |
| EKRSTAPSAA | ASASASAAAASSPAGGGAEALLE  | TIF1B_HUMAN |      |      | Transcription intermediary factor 1-       | -1.40                           | 0.07                  | 95.90                | 4.35 |
| KRSTAPSAAA | SASASAAAASSPAGGGAEALLEH  | TIF1B_HUMAN |      |      | Transcription intermediary factor 1-       | -1.46                           | 0.12                  | 75.80                | 6.31 |
| RSTAPSAAAS | ASASAAAASSPAGGGAEALLEHC  | TIF1B_HUMAN |      |      | Transcription intermediary factor 1-       | -1.80                           | 0.19                  | 40.30                | 4.90 |
| QHLQSSRHRR | ALDTNYCFSSTEKNCCVR       | TGFB1_HUMAN |      |      | Transforming growth                        | 1.21                            | 0.11                  | 35.30                | 3.27 |
| LALGPAATLA | GPAKSPYQLVLQHSR          | BGH3_HUMAN  |      |      | Transforming growth                        | -0.40                           | 0.01                  | 30.50                | 2.34 |
| EGKNMACVQR | TLMNLGGLAVAR             | TAGL2_HUMAN |      |      | Transgelin-2;                              | 3.65                            | 0.41                  | 64.00                | 2.89 |
| HVGADLAALC | SEAALQAIR                | TERA_HUMAN  |      |      | Transitional endoplasmic reticulum ATPase; | -1.52                           | 0.18                  | 30.60                | 3.22 |
| YKVGDKIATR | KAYGQALAKLGHASDR         | TKT_HUMAN   |      |      | Transketolase;                             | 2.08                            | 0.11                  | 36.80                | 1.13 |
| KVGDKIATRK | AYGQALAKLGHASDR          | TKT_HUMAN   |      |      | Transketolase;                             | 0.57                            | 0.05                  | 32.70                | 4.91 |
| ATRNRTPFC  | STFAAFFTR                | TKT_HUMAN   |      |      | Transketolase;                             | 0.38                            | 0.02                  | 30.60                | 4.43 |
| IIQEIYSIQI | SKKKILATPPQEDAPSVDIANIR  | TKT_HUMAN   |      |      | Transketolase;                             | 0.17                            | 0.01                  | 45.40                | 1.96 |

Table S6

| Non-prime  | Prime             | Id 1        | Id 2 | Id 3 | Protein (Id1)                                     | Fold-change (log <sub>2</sub> ) | Fc standard deviation | X! Tandem hyperscore | ppm  |
|------------|-------------------|-------------|------|------|---------------------------------------------------|---------------------------------|-----------------------|----------------------|------|
| KKILATPPQE | DAPSVDIANIR       | TKT_HUMAN   |      |      | Transketolase;                                    | -0.26                           | 0.01                  | 39.70                | 3.32 |
| YEGGIGEAVS | SAVVGEPGIVTHLAVNR | TKT_HUMAN   |      |      | Transketolase;                                    | -1.14                           | 0.05                  | 49.90                | 4.90 |
| TRNRTVPFCS | TFAAFFTR          | TKT_HUMAN   |      |      | Transketolase;                                    | -1.96                           | 0.08                  | 26.60                | 0.60 |
| YLPSVTPGLK | ASLLDPVPEVR       | GCN1L_HUMAN |      |      | Translational activator                           | -0.92                           | 0.05                  | 35.90                | 2.78 |
| EIVLCGIQLV | NATIGVFCGDCR      | T4S5_HUMAN  |      |      | Transmembrane 4 L6 family member 5;               | 5.38                            | 0.67                  | 25.40                | 0.43 |
| FLLGPRLVLA | ISFHLPINR         | TMEDA_HUMAN |      |      | Transmembrane emp24 domain-containing protein 10; | 1.54                            | 0.16                  | 32.70                | 1.90 |
| MQGPAGNASR | GLPGGPPSTVASGAGR  | TM110_HUMAN |      |      | Transmembrane protein                             | 6.34                            | 0.38                  | 27.20                | 2.98 |
| PSVVKRMPAM | LTGLCQGCGR        | TMEM2_HUMAN |      |      | Transmembrane protein 2;                          | -1.52                           | 0.13                  | 38.70                | 0.32 |
| QVVFTSDPHK | SYLPVQFQSPDKAETQR | TMEM2_HUMAN |      |      | Transmembrane protein 2;                          | -2.88                           | 0.21                  | 37.80                | 4.21 |
| EAPAAVTSAQ | VIKPLIFVDPNR      | TCOF_HUMAN  |      |      | Treacle protein;                                  | 0.59                            | 0.02                  | 23.90                | 1.46 |
| EPVWAIGTGK | TATPQQAQEVHEKLR   | TPIS_HUMAN  |      |      | Triosephosphate isomerase;                        | 1.21                            | 0.08                  | 33.20                | 3.49 |
| VHEKLRGWLK | SNVSDAVAQSTR      | TPIS_HUMAN  |      |      | Triosephosphate isomerase;                        | 0.94                            | 0.08                  | 59.90                | 2.22 |
| DVDGFLVGGA | SLKPEFVDIINAK     | TPIS_HUMAN  |      |      | Triosephosphate isomerase;                        | 0.91                            | 0.05                  | 27.10                | 2.46 |
| YEPVWAIGTG | KTATPQQAQEVHEKLR  | TPIS_HUMAN  |      |      | Triosephosphate isomerase;                        | -0.24                           | 0.01                  | 37.20                | 2.44 |
| SPGMIKDCGA | TWVVLGHSER        | TPIS_HUMAN  |      |      | Triosephosphate                                   | -0.69                           | 0.04                  | 38.00                | 3.44 |
| RPPLGFLNPR | LYQQHGAGLFDVTR    | TPP1_HUMAN  |      |      | Tripeptidyl-peptidase 1;                          | 3.86                            | 0.18                  | 35.80                | 1.10 |
| EADRKYEEVA | RKLVIIEGDLER      | TPM3_HUMAN  |      |      | Tropomyosin alpha-3 chain;                        | 0.51                            | 0.03                  | 43.70                | 0.40 |
| FVDPWTVQTS | SAKGIDYDKLIVR     | SYWC_HUMAN  |      |      | Tryptophan--tRNA ligase,                          | 0.79                            | 0.06                  | 27.60                | 1.85 |

Table S6

| Non-prime  | Prime                    | Id 1        | Id 2        | Id 3        | Protein (Id1)           | Fold-change (log <sub>2</sub> ) | Fc standard deviation | X! Tandem hyperscore | ppm   |
|------------|--------------------------|-------------|-------------|-------------|-------------------------|---------------------------------|-----------------------|----------------------|-------|
| VDEVVAGTYR | QLFHPEQLITGKEDAANNYAR    | TBA1A_HUMAN | TBA1B_HUMAN | TBA1C_HUMAN | Tubulin alpha-1A chain; | 2.30                            | 0.08                  | 48.40                | 1.50  |
| QPDGQMPSDK | TIGGGDDSFNTFFSETGAGKHVPR | TBA1A_HUMAN | TBA1B_HUMAN | TBA1C_HUMAN | Tubulin alpha-1A chain; | 0.83                            | 0.03                  | 50.10                | 2.38  |
| GKHPRAVVF  | DLEPTVIDEVR              | TBA1A_HUMAN | TBA1B_HUMAN | TBA1C_HUMAN | Tubulin alpha-1A chain; | 0.78                            | 0.07                  | 52.50                | 0.68  |
| VVDEVVAGTY | RQLFHPEQLITGKEDAANNYAR   | TBA1A_HUMAN | TBA1B_HUMAN | TBA1C_HUMAN | Tubulin alpha-1A chain; | 0.66                            | 0.03                  | 38.10                | 3.52  |
| VDWCPTGFKV | GINYQPPTVPPGGDLAKVQR     | TBA1A_HUMAN | TBA1B_HUMAN | TBA1C_HUMAN | Tubulin alpha-1A chain; | 0.56                            | 0.04                  | 20.00                | 2.25  |
| FVDWCPTGFK | VGINYQPPTVPPGGDLAKVQR    | TBA1A_HUMAN | TBA1B_HUMAN | TBA1C_HUMAN | Tubulin alpha-1A chain; | 0.42                            | 0.03                  | 43.70                | -1.50 |
| GAGKHVPRAV | FVDLEPTVIDEVR            | TBA1A_HUMAN | TBA1B_HUMAN | TBA1C_HUMAN | Tubulin alpha-1A chain; | 0.28                            | 0.01                  | 43.80                | 3.59  |
| FEGPLNVDLI | EFQTNLVPYPR              | TBA1A_HUMAN | TBA1B_HUMAN | TBA1C_HUMAN | Tubulin alpha-1A chain; | 0.20                            | 0.01                  | 43.80                | 2.29  |
| PTGFKVGINY | QPPTVPPGGDLAKVQR         | TBA1A_HUMAN | TBA1B_HUMAN | TBA1C_HUMAN | Tubulin alpha-1A chain; | 0.13                            | 0.01                  | 22.10                | 1.33  |
| ETGAGKHVPR | AVFVDLEPTVIDEVR          | TBA1A_HUMAN | TBA1B_HUMAN | TBA1C_HUMAN | Tubulin alpha-1A chain; | 0.04                            | 0.00                  | 66.90                | 5.87  |
| DEVVAGTYRQ | LFHPEQLITGKEDAANNYAR     | TBA1A_HUMAN | TBA1B_HUMAN | TBA1C_HUMAN | Tubulin alpha-1A chain; | -0.29                           | 0.01                  | 38.90                | 1.36  |
| LTSRGSQQYR | ALTVPELTQQVFDAKNMMAACDP  | TBB5_HUMAN  |             |             | Tubulin beta chain;     | 0.53                            | 0.06                  | 41.10                | 0.36  |
| GSDQLDLRI  | SVYYNEATGGKYVPR          | TBB5_HUMAN  |             |             | Tubulin beta chain;     | 0.48                            | 0.05                  | 29.80                | 2.31  |
| QSGAGNNWAK | GHYTEGAELVDSVLDVVR       | TBB5_HUMAN  | TBB2A_HUMAN | TBB2B_HUMAN | Tubulin beta chain;     | 0.38                            | 0.03                  | 48.70                | 1.41  |
| EATGGKYVPR | AILVDLEPGTMDSVR          | TBB2A_HUMAN | TBB2B_HUMAN | TBB3_HUMAN  | Tubulin beta-2A chain;  | 1.31                            | 0.08                  | 40.30                | 0.30  |
| AGNNWAKGHY | TEGAELVDSVLDVVR          | TBB4B_HUMAN | TBB2A_HUMAN | TBB2B_HUMAN | Tubulin beta-4B chain;  | 0.51                            | 0.09                  | 71.90                | 3.80  |

Table S6

| Non-prime  | Prime                    | Id 1        | Id 2        | Id 3        | Protein (Id1)                                          | Fold-change (log <sub>2</sub> ) | Fc standard deviation | X! Tandem hyperscore | ppm   |
|------------|--------------------------|-------------|-------------|-------------|--------------------------------------------------------|---------------------------------|-----------------------|----------------------|-------|
| GDSLQLERI  | NVYYNEATGGKYVPR          | TBB4B_HUMAN |             |             | Tubulin beta-4B chain;                                 | 0.45                            | 0.03                  | 26.50                | 3.16  |
| SGGRYVRAV  | LVDLEPGTMDSVR            | TBB4B_HUMAN | TBB2A_HUMAN | TBB2B_HUMAN | Tubulin beta-4B chain;                                 | 0.42                            | 0.04                  | 30.30                | -0.21 |
| EASGGRYVPR | AVLVDLEPGTMDSVR          | TBB4B_HUMAN | TBB4A_HUMAN | TBB8_HUMAN  | Tubulin beta-4B chain;                                 | 0.38                            | 0.02                  | 63.90                | 5.31  |
| LKMASTFIGN | STAIQELFKR               | TBB4B_HUMAN | TBB2A_HUMAN | TBB2B_HUMAN | Tubulin beta-4B chain;                                 | 0.30                            | 0.02                  | 21.70                | 0.16  |
| GNNWAKGHYT | EGAELVDSVLDVVR           | TBB4B_HUMAN | TBB2A_HUMAN | TBB2B_HUMAN | Tubulin beta-4B chain;                                 | 0.28                            | 0.04                  | 55.70                | 5.40  |
| GRYVPRAVLV | DLEPGTMDSVR              | TBB4B_HUMAN | TBB2A_HUMAN | TBB2B_HUMAN | Tubulin beta-4B chain;                                 | 0.22                            | 0.02                  | 30.80                | 5.58  |
| GAGNNWAKGH | YTEGAELVDSVLDVVR         | TBB4B_HUMAN | TBB2A_HUMAN | TBB2B_HUMAN | Tubulin beta-4B chain;                                 | -0.37                           | 0.05                  | 48.20                | 4.11  |
| LTSRGSQQYR | ALTVPELTQQMFDAR          | TBB6_HUMAN  |             |             | Tubulin beta-6 chain;                                  | 0.98                            | 0.09                  | 58.30                | 1.31  |
| RGPERRPAER | SSPGQTPEEGAQALAEFAALHGPA | TTL12_HUMAN |             |             | Tubulin--tyrosine ligase-like protein 12;              | -0.16                           | 0.01                  | 37.30                | 8.82  |
| APFFYMPQQV | AYTLLWPLR                | TTL12_HUMAN |             |             | Tubulin--tyrosine ligase-                              | -0.19                           | 0.02                  | 33.10                | 0.00  |
| PGSAASPRLR | EGPELSPDDPAGLLDLR        | TNFI9_HUMAN |             |             | Tumor necrosis factor                                  | 1.51                            | 0.11                  | 72.10                | 5.16  |
| ASPGSAASPR | LREGPELSPDDPAGLLDLR      | TNFI9_HUMAN |             |             | Tumor necrosis factor ligand superfamily               | 0.96                            | 0.06                  | 63.00                | 4.44  |
| GTAPCSRGS  | WSADLDKCMDCASCR          | TNR12_HUMAN |             |             | Tumor necrosis factor                                  | -1.09                           | 0.12                  | 29.70                | 6.05  |
| CDEWGRRARR | GVEVAAGASSGGETR          | TR19L_HUMAN |             |             | Tumor necrosis factor receptor superfamily member 19L; | 1.31                            | 0.07                  | 72.20                | 4.27  |
| STTAQPEQK  | ASNLIQTYR                | TNR21_HUMAN |             |             | Tumor necrosis factor receptor superfamily             | -0.76                           | 0.04                  | 40.30                | 1.17  |
| QDISIKRLQR | LLQALEAPEGWGPTPR         | TNF6B_HUMAN |             |             | Tumor necrosis factor receptor superfamily member 6B;  | 6.03                            | 0.94                  | 84.70                | 4.25  |
| AALQLKLR   | LTELLGAQDGALLVR          | TNF6B_HUMAN |             |             | Tumor necrosis factor receptor superfamily             | 2.35                            | 0.15                  | 89.30                | 2.32  |

Table S6

| Non-prime   | Prime                     | Id 1        | Id 2 | Id 3 | Protein (Id1)                                         | Fold-change (log <sub>2</sub> ) | Fc standard deviation | X! Tandem hyperscore | ppm   |
|-------------|---------------------------|-------------|------|------|-------------------------------------------------------|---------------------------------|-----------------------|----------------------|-------|
| ALLPVPVAVRG | VAETPTYPW                 | TNF6B_HUMAN |      |      | Tumor necrosis factor receptor superfamily member 6B; | 1.70                            | 0.02                  | 23.70                | 1.91  |
| RAALQLKLRR  | RLTELLGAQDGALLVR          | TNF6B_HUMAN |      |      | Tumor necrosis factor receptor superfamily            | 1.33                            | 0.07                  | 42.80                | -1.54 |
| ALQLKLRRRL  | TELLGAQDGALLVR            | TNF6B_HUMAN |      |      | Tumor necrosis factor receptor superfamily            | 1.16                            | 0.14                  | 67.50                | 0.40  |
| TLSQAGQKTS  | AALSTVGSISR               | TPD54_HUMAN |      |      | Tumor protein D54;                                    | 0.70                            | 0.08                  | 40.20                | -0.52 |
| DSAGQDINLN  | SPNKGLSDSMTDVPVDTGVAAR    | TPD54_HUMAN |      |      | Tumor protein D54;                                    | 0.61                            | 0.05                  | 52.80                | 8.33  |
| PYEAVTPLTK  | AADISLDNLVEGKR            | TP53B_HUMAN |      |      | Tumor suppressor p53-binding protein 1;               | 1.35                            | 0.11                  | 35.50                | 3.12  |
| AAAGPSDGLD  | ASSPGNSFVGLR              | TP53B_HUMAN |      |      | Tumor suppressor p53-                                 | -1.24                           | 0.06                  | 42.70                | -0.08 |
| QIKINEVQTD  | VGVDTKHQTLQGVAFPIR        | TWF1_HUMAN  |      |      | Twinfilin-1;                                          | -1.46                           | 0.04                  | 35.90                | -1.51 |
| LQQIRINEVK  | TEISVESKHQTLQGLAFPLQPEAQF | TWF2_HUMAN  |      |      | Twinfilin-2;                                          | -0.55                           | 0.02                  | 45.80                | 4.90  |
| SVLLPLGLRK  | AHSGAQGLLAAQKAR           | SYYM_HUMAN  |      |      | Tyrosine--tRNA ligase, mitochondrial;                 | 0.38                            | 0.04                  | 35.70                | 3.45  |
| VPLAWCLALC  | GWACMAPR                  | UFO_HUMAN   |      |      | Tyrosine-protein kinase                               | 8.39                            | 1.12                  | 25.40                | 1.84  |
| HNAKGVTTSR  | TATITVLPQQPR              | UFO_HUMAN   |      |      | Tyrosine-protein kinase receptor UFO;                 | 3.98                            | 0.34                  | 27.10                | 6.57  |
| ASCAWSGVAG  | EEELQVIQPKSVLVAAGETATLR   | SHPS1_HUMAN |      |      | Tyrosine-protein phosphatase non-receptor             | -1.46                           | 0.08                  | 77.70                | 7.43  |
|             | MVKLTAELIEQAAQYTNVAVR     | RU2A_HUMAN  |      |      | U2 small nuclear ribonucleoprotein A';                | -0.65                           | 0.01                  | 43.90                | 5.30  |

Table S6

| Non-prime  | Prime                   | Id 1        | Id 2 | Id 3 | Protein (Id1)                                        | Fold-change (log <sub>2</sub> ) | Fc standard deviation | X! Tandem hyperscore | ppm   |
|------------|-------------------------|-------------|------|------|------------------------------------------------------|---------------------------------|-----------------------|----------------------|-------|
| VLEQRGRLQK | LVAKEIQAPASADIR         | U3IP2_HUMAN |      |      | U3 small nucleolar RNA-interacting protein 2;        | 0.24                            | 0.02                  | 33.20                | 3.41  |
| TARSLQYEYK | ANSNLVLQADR             | U520_HUMAN  |      |      | U5 small nuclear ribonucleoprotein 200 kDa helicase; | 0.46                            | 0.05                  | 55.20                | 1.38  |
| NKMKGYTLLS | EGIDEMVGHIYKPKTKETR     | U520_HUMAN  |      |      | U5 small nuclear ribonucleoprotein 200               | -0.52                           | 0.03                  | 30.50                | 2.98  |
| INKMKGYTLL | SEGIDEMVGHIYKPKTKETR    | U520_HUMAN  |      |      | U5 small nuclear ribonucleoprotein 200               | -0.52                           | 0.02                  | 48.50                | -0.12 |
| VKRQRHELLL | GAGSGPGAGQQQATPGALLQAGP | SNR40_HUMAN |      |      | U5 small nuclear ribonucleoprotein 40 kDa            | -0.40                           | 0.03                  | 46.90                | 3.42  |
| GSGPGAGQQQ | ATPGALLQAGPPR           | SNR40_HUMAN |      |      | U5 small nuclear ribonucleoprotein 40 kDa            | -1.29                           | 0.19                  | 55.30                | 4.60  |
| MADDVDQQQ  | TTNTVEEPLDLIR           | LSM3_HUMAN  |      |      | U6 snRNA-associated Sm-like protein LSM3;            | -0.88                           | 0.05                  | 44.00                | 7.81  |
| QDGIAPRMFK | ALIGKGHPEFSTNR          | UBP5_HUMAN  |      |      | Ubiquitin carboxyl-terminal hydrolase 5;             | 1.10                            | 0.05                  | 28.30                | 3.15  |
| LFAQTVRVLK | KINKPGNMIMAFSNLAER      | UBE4A_HUMAN |      |      | Ubiquitin conjugation factor E4 A;                   | -0.96                           | 0.06                  | 24.80                | 3.74  |
| SVSESLDEFD | YSVAEISR                | UBE4A_HUMAN |      |      | Ubiquitin conjugation factor E4 A;                   | -1.09                           | 0.09                  | 25.60                | 2.61  |
| YDEAIMAQQD | RIQQEIAVQNPLVSR         | OTUB1_HUMAN |      |      | Ubiquitin thioesterase                               | -6.06                           | 0.00                  | 44.00                | 1.10  |
| TKIFTASNVS | SVPLPAENVTTITAGQR       | UBP2L_HUMAN |      |      | Ubiquitin-associated                                 | 1.37                            | 0.09                  | 64.70                | 3.02  |
| DPKFVERTLR | LAGTQPLEVLEAVQR         | UBA1_HUMAN  |      |      | Ubiquitin-like modifier-activating enzyme 1;         | 1.84                            | 0.10                  | 79.90                | 0.97  |
| SVQVPEFTPK | SGVKIHVSDQELQSANASVDDSR | UBA1_HUMAN  |      |      | Ubiquitin-like modifier-activating enzyme 7;         | 0.37                            | 0.03                  | 51.10                | 3.96  |
| GSALLYAAGW | SPEKQAQHLPLR            | UBA7_HUMAN  |      |      | Ubiquitin-like modifier-activating enzyme 7;         | 6.67                            | 0.82                  | 31.80                | -2.46 |
|            | MIEVVCNDR               | UBL5_HUMAN  |      |      | Ubiquitin-like protein 5;                            | 0.81                            | 0.07                  | 30.10                | 0.17  |
| GAPKRRRPAR | SIFDGFR                 | UBXN7_HUMAN |      |      | UBX domain-containing                                | 0.89                            | 0.03                  | 27.30                | 4.14  |
| APDGNGGLYR | ALAAQNIVEDMEQR          | UAP1_HUMAN  |      |      | UDP-N-acetylhexosamine pyrophosphorylase;            | 0.85                            | 0.07                  | 72.30                | 1.48  |
| SGGVNLFAND | GSFLELFKR               | CS043_HUMAN |      |      | Uncharacterized protein C19orf43;                    | -1.34                           | 0.10                  | 21.90                | 0.34  |
| DQSLLLTLRH | LHSVLEELR               | CT202_HUMAN |      |      | Uncharacterized protein C20orf202;                   | 7.31                            | 0.60                  | 31.00                | 1.69  |

Table S6

| Non-prime    | Prime                    | Id 1        | Id 2 | Id 3 | Protein (Id1)                                    | Fold-change (log <sub>2</sub> ) | Fc standard deviation | X! Tandem hyperscore | ppm   |
|--------------|--------------------------|-------------|------|------|--------------------------------------------------|---------------------------------|-----------------------|----------------------|-------|
| SNKIAEMMFG   | FVLDIRPER                | CE025_HUMAN |      |      | Uncharacterized protein                          | 0.28                            | 0.03                  | 27.00                | 2.44  |
| QFSAGRWGS    | AAVSAAAAAATR             | CI041_HUMAN |      |      | UPF0586 protein                                  | -1.65                           | 0.10                  | 47.20                | 5.35  |
| FSAGRWGSAA   | AVSAAAAAATR              | CI041_HUMAN |      |      | UPF0586 protein                                  | -2.24                           | 0.11                  | 44.20                | 1.01  |
| EVQFSAGRWG   | SAAAVSAAAAAATR           | CI041_HUMAN |      |      | C9orf41;<br>UPF0586 protein                      | -2.46                           | 0.27                  | 76.30                | 0.90  |
| QDLSKAMSQD   | GASQFQEVIR               | UGPA_HUMAN  |      |      | UTP--glucose-1-phosphate                         | -1.29                           | 0.16                  | 47.10                | 3.51  |
| HGSVQESQVS   | EQPATEAAGENPLEFLR        | RD23A_HUMAN |      |      | UV excision repair                               | -0.88                           | 0.05                  | 90.10                | 6.82  |
| AATTTATTTT   | TSSGGHPLEFLR             | RD23B_HUMAN |      |      | UV excision repair                               | 0.66                            | 0.03                  | 32.90                | 3.14  |
| ATTTATTTT    | SSGGHPLEFLR              | RD23B_HUMAN |      |      | protein RAD23 homolog                            | 0.13                            | 0.01                  | 33.80                | 2.27  |
| AVAAAAATTT   | ATTTTTSSGGHPLEFLR        | RD23B_HUMAN |      |      | UV excision repair                               | -0.21                           | 0.02                  | 45.70                | 1.05  |
| VAAAAATTTA   | TTTTTSSGGHPLEFLR         | RD23B_HUMAN |      |      | protein RAD23 homolog                            | -0.26                           | 0.02                  | 34.70                | -0.34 |
| LRAMRGIVNG   | AAPELVPVPTGGPAVGAR       | VATB2_HUMAN |      |      | V-type proton ATPase                             | -0.58                           | 0.03                  | 56.20                | 1.20  |
| SLAAAAAAAA   | AEQQVPLVLWSSDR           | VAS1_HUMAN  |      |      | V-type proton ATPase subunit S1;                 | 0.91                            | 0.06                  | 58.60                | 3.62  |
| LAAAAAAAA    | EQQVPLVLWSSDR            | VAS1_HUMAN  |      |      | V-type proton ATPase subunit S1;                 | 0.60                            | 0.04                  | 58.60                | 3.97  |
| FLSLAAAAAAAA | AAAEQQVPLVLWSSDR         | VAS1_HUMAN  |      |      | V-type proton ATPase                             | 0.59                            | 0.03                  | 71.40                | 4.82  |
| LSLAAAAAAAA  | AAEQVPLVLWSSDR           | VAS1_HUMAN  |      |      | V-type proton ATPase subunit S1;                 | 0.28                            | 0.02                  | 58.70                | 3.70  |
| RPHVKKATPR   | MIGLTVGFDDK              | VP13A_HUMAN |      |      | Vacuolar protein sorting-associated protein 13A; | 9.67                            | 1.50                  | 23.40                | 8.57  |
|              | MVLESVVADLLNR            | VP13C_HUMAN |      |      | Vacuolar protein sorting-                        | -0.16                           | 0.01                  | 55.00                | 1.32  |
| VNKKFSVRYF   | LNLVLDDEDR               | VP26A_HUMAN |      |      | Vacuolar protein sorting-                        | -6.06                           | 0.00                  | 30.60                | 4.44  |
| KNSTTLPRMK   | SSSVTTSETQPCTPSSSDYSDLQR | VASP_HUMAN  |      |      | Vasodilator-stimulated                           | 0.17                            | 0.01                  | 64.30                | 2.70  |
| PRPGPARRPY   | AGGAAQLALDKSDSHPSDALTR   | ACADV_HUMAN |      |      | Very long-chain specific                         | 0.60                            | 0.04                  | 42.60                | -0.09 |
| LRPSTSRSLY   | ASSPGGVYATR              | VIME_HUMAN  |      |      | Vimentin;                                        | 1.63                            | 0.07                  | 29.60                | 5.21  |
| LPLVDTHSKR   | LLIKTVETR                | VIME_HUMAN  |      |      | Vimentin;                                        | 0.59                            | 0.05                  | 20.60                | 3.08  |



Table S6

| Non-prime  | Prime                  | Id 1        | Id 2       | Id 3 | Protein (Id1)                               | Fold-change (log <sub>2</sub> ) | Fc standard deviation | X! Tandem hyperscore | ppm   |
|------------|------------------------|-------------|------------|------|---------------------------------------------|---------------------------------|-----------------------|----------------------|-------|
| NLQEAEEWYK | SKFADLSEAANR           | VIME_HUMAN  |            |      | Vimentin;                                   | 0.24                            | 0.02                  | 40.90                | 3.92  |
| FLEQQNKILL | AELEQLKGQKSR           | VIME_HUMAN  |            |      | Vimentin;                                   | 0.13                            | 0.01                  | 24.80                | 1.76  |
| QEAEWYKSK  | FADLSEAANR             | VIME_HUMAN  |            |      | Vimentin;                                   | 0.04                            | 0.00                  | 32.20                | 0.89  |
| LLQDSVDFSL | ADAINTEFKNTR           | VIME_HUMAN  |            |      | Vimentin;                                   | -0.09                           | 0.01                  | 27.30                | -1.66 |
| GVRLLQDSVD | FSLADAINTEFKNTR        | VIME_HUMAN  |            |      | Vimentin;                                   | -0.11                           | 0.01                  | 23.80                | -1.22 |
| QAKQESTEYR | RQVQSLTCEVDALKGTNESLER | VIME_HUMAN  |            |      | Vimentin;                                   | -0.80                           | 0.04                  | 66.30                | 0.46  |
| EYRRQVQSLT | CEVDALKGTNESLER        | VIME_HUMAN  |            |      | Vimentin;                                   | -0.83                           | 0.09                  | 36.40                | 4.41  |
| ESTEYRRQVQ | SLTCEVDALKGTNESLER     | VIME_HUMAN  |            |      | Vimentin;                                   | -1.00                           | 0.08                  | 28.70                | 4.88  |
| DKVRFLEQQN | KILLAELEQLKGQKSR       | VIME_HUMAN  |            |      | Vimentin;                                   | -1.19                           | 0.05                  | 27.90                | 5.12  |
| VRLQDSVDF  | SLADAINTEFKNTR         | VIME_HUMAN  |            |      | Vimentin;                                   | -1.59                           | 0.14                  | 34.30                | 3.52  |
| QEQHVQIDVD | VSKPDLTAALR            | VIME_HUMAN  |            |      | Vimentin;                                   | -1.87                           | 0.07                  | 36.50                | 1.69  |
| QDSVDFSLAD | AINTEFKNTR             | VIME_HUMAN  |            |      | Vimentin;                                   | -2.05                           | 0.17                  | 22.20                | 5.51  |
| EQHVQIDVDV | SKPDLTAALR             | VIME_HUMAN  | DESM_HUMAN |      | Vimentin;                                   | -2.34                           | 0.12                  | 33.20                | 4.64  |
| M          | KLTDSVLR               | WDR82_HUMAN |            |      | WD repeat-containing                        | -0.69                           | 0.07                  | 33.70                | 3.39  |
| WQQHQGLLPP | GMTIDLFR               | SMU1_HUMAN  |            |      | WD40 repeat-containing                      | -1.00                           | 0.10                  | 23.90                | -1.01 |
| PPPAPQPQAR | SRLNATASLEQER          | WFS1_HUMAN  |            |      | Wolframin;                                  | -0.34                           | 0.04                  | 33.80                | 1.59  |
| TKIPNPRFQR | LFQCLLHR               | XRCC5_HUMAN |            |      | X-ray repair cross-complementing protein 5; | 4.35                            | 0.33                  | 24.20                | 1.97  |
| EQGGAHFSVS | SLAEGSVTSVGSVNPAENFR   | XRCC5_HUMAN |            |      | X-ray repair cross-complementing protein 5; | -0.46                           | 0.04                  | 84.70                | 6.18  |
| GGAHFSVSSL | AEGSVTSVGSVNPAENFR     | XRCC5_HUMAN |            |      | X-ray repair cross-complementing protein 5; | -0.80                           | 0.08                  | 63.40                | 3.23  |
| AHFSVSSLAE | GSVTSVGSVNPAENFR       | XRCC5_HUMAN |            |      | X-ray repair cross-complementing protein 5; | -1.14                           | 0.10                  | 84.80                | 2.17  |
| ALAILLLQGL | VVWSFSGLEEDAGEKGR      | XYLT2_HUMAN |            |      | Xylosyltransferase 2;                       | 0.66                            | 0.05                  | 24.00                | 3.56  |

Table S6

| Non-prime  | Prime                     | Id 1        | Id 2        | Id 3 | Protein (Id1)                                                          | Fold-change (log <sub>2</sub> ) | Fc standard deviation | X! Tandem hyperscore | ppm   |
|------------|---------------------------|-------------|-------------|------|------------------------------------------------------------------------|---------------------------------|-----------------------|----------------------|-------|
| HSSPASLQLG | AVSPGTLTPTGVVSGPAATPTAQHI | YAP1_HUMAN  |             |      | Yorkie homolog;                                                        | 0.17                            | 0.01                  | 68.90                | 5.07  |
| STDFSSSSQE | AFAASAVGSGERR             | ZBT22_HUMAN |             |      | Zinc finger and BTB                                                    | -1.34                           | 0.07                  | 27.50                | -0.08 |
| ILKTLRQQTS | SRPPASVGE LSSSGLGDPR      | ZC3H4_HUMAN |             |      | Zinc finger CCCH                                                       | -0.88                           | 0.05                  | 40.50                | 4.57  |
| TLPAARSSLG | SLQTPEAVTTR               | ZCCHV_HUMAN |             |      | domain-containing protein                                              | 0.76                            | 0.05                  | 39.60                | 3.41  |
| TPSPDQISHR | ASLEDAPVDDLTR             | ZCCHV_HUMAN |             |      | Zinc finger CCCH-type                                                  | 0.56                            | 0.06                  | 44.40                | 5.64  |
| IECGQAFIQK | AHLIVHQR                  | ZN175_HUMAN |             |      | Zinc finger CCCH-type                                                  | -9.97                           | 0.00                  | 26.20                | 5.95  |
| RGGPSRRAPR | AAQPPAQPCQLCGR            | ZN428_HUMAN |             |      | antiviral protein 1;                                                   | 0.56                            | 0.11                  | 41.00                | 2.27  |
| ISASVAVKQS | SVTQVTEQSPKVQSR           | ZN638_HUMAN |             |      | Zinc finger protein 175;                                               | 1.42                            | 0.10                  | 43.10                | 3.52  |
| PARSPPLQLS | EAELLNQLQR                | ZN646_HUMAN |             |      | Zinc finger protein 428;                                               | -0.29                           | 0.03                  | 32.70                | 5.87  |
| IVKNTVCPEQ | SEALAGGSAGDGAQAAGVTKEGP   | ZN687_HUMAN |             |      | Zinc finger protein 638;                                               | 0.24                            | 0.02                  | 55.30                | -0.15 |
| LKKEGLISQD | GSSLEALLR                 | REQU_HUMAN  |             |      | Zinc finger protein 646;                                               | 3.71                            | 0.23                  | 40.50                | 0.82  |
| RNSPDVSYER | SIKCEKNGNLK               | FOG2_HUMAN  |             |      | Zinc finger protein 687;                                               | 1.96                            | 0.14                  | 27.50                | 7.04  |
| TLAEKSRGLF | SANDWQCKTCSNVNWAR         | ZRAB2_HUMAN |             |      | Zinc finger protein ubi-<br>d4;                                        | -0.58                           | 0.06                  | 36.90                | 3.23  |
| LRHARWFQAR | ASGLQPCVIVIR              | ZFR2_HUMAN  |             |      | Zinc finger Ran-binding                                                | -0.02                           | 0.00                  | 32.60                | 1.94  |
| VTPASLAALQ | SDVQPVGHDYVEEVR           | ZFR_HUMAN   |             |      | domain-containing protein                                              | -0.14                           | 0.01                  | 61.80                | 2.10  |
| SEPVTASLA  | ALQSDVQPVGHDYVEEVR        | ZFR_HUMAN   |             |      | Zinc finger RNA-binding                                                | -0.21                           | 0.02                  | 46.90                | 5.01  |
| SLELGLQVMR | MTLSTLNWRR                | ZSWM5_HUMAN | ZSWM6_HUMAN |      | Zinc finger RNA-binding                                                | 0.42                            | 0.02                  | 19.70                | 2.82  |
| EGELRHTRKR | EAPHVKNNAIISLR            | S39AA_HUMAN |             |      | protein;                                                               | 2.68                            | 0.16                  | 35.70                | 1.17  |
| LLEMCVSGDL | VCEVDLGDLSPEGR            | ZADH2_HUMAN |             |      | Zinc finger SWIM                                                       | -6.06                           | 0.00                  | 24.00                | -2.15 |
| QVQLHVQSQT | QPVSLANTQPR               | ZYX_HUMAN   |             |      | domain-containing protein                                              | 0.56                            | 0.04                  | 42.60                | 6.53  |
| YYKMKGDYHR | YLAEFATGNDR               | 1433E_HUMAN |             |      | Zinc transporter ZIP10;                                                | 3.21                            | 0.21                  | 41.00                | 9.33  |
|            |                           |             |             |      | Zinc-binding alcohol<br>dehydrogenase domain-<br>containing protein 2; |                                 |                       |                      |       |
|            |                           |             |             |      | Zyxin;                                                                 |                                 |                       |                      |       |

Table S6

| Non-prime  | Prime            | Id 1        | Id 2 | Id 3 | Protein (Id1) | Fold-change (log <sub>2</sub> ) | Fc standard deviation | X! Tandem hyperscore | ppm   |
|------------|------------------|-------------|------|------|---------------|---------------------------------|-----------------------|----------------------|-------|
| SEIQDRCCRK | AALLDQALSAR      | MACF4_HUMAN |      |      |               | 2.96                            | 0.13                  | 30.20                | 0.63  |
| EKKGEKKEKK | QSIAGSADSKPIDVSR | AIMP1_HUMAN |      |      |               | 1.05                            | 0.08                  | 37.90                | -0.22 |

Table S6

| <b>Non-prime</b> | <b>Prime</b> | <b>Id 1</b> | <b>Id 2</b> | <b>Id 3</b> | <b>Protein (Id1)</b> | <b>Fold-change<br/>(log<sub>2</sub>)</b> | <b>Fc<br/>standard<br/>deviation</b> | <b>X! Tandem<br/>hyperscore</b> | <b>ppm</b> |
|------------------|--------------|-------------|-------------|-------------|----------------------|------------------------------------------|--------------------------------------|---------------------------------|------------|
|------------------|--------------|-------------|-------------|-------------|----------------------|------------------------------------------|--------------------------------------|---------------------------------|------------|

Table S6

| <b>Non-prime</b> | <b>Prime</b> | <b>Id 1</b> | <b>Id 2</b> | <b>Id 3</b> | <b>Protein (Id1)</b> | <b>Fold-change<br/>(log<sub>2</sub>)</b> | <b>Fc<br/>standard<br/>deviation</b> | <b>X! Tandem<br/>hyperscore</b> | <b>ppm</b> |
|------------------|--------------|-------------|-------------|-------------|----------------------|------------------------------------------|--------------------------------------|---------------------------------|------------|
|------------------|--------------|-------------|-------------|-------------|----------------------|------------------------------------------|--------------------------------------|---------------------------------|------------|

Table S6

| <b>Non-prime</b> | <b>Prime</b> | <b>Id 1</b> | <b>Id 2</b> | <b>Id 3</b> | <b>Protein (Id1)</b> | <b>Fold-change<br/>(log<sub>2</sub>)</b> | <b>Fc<br/>standard<br/>deviation</b> | <b>X! Tandem<br/>hyperscore</b> | <b>ppm</b> |
|------------------|--------------|-------------|-------------|-------------|----------------------|------------------------------------------|--------------------------------------|---------------------------------|------------|
|------------------|--------------|-------------|-------------|-------------|----------------------|------------------------------------------|--------------------------------------|---------------------------------|------------|

Table S6

| <b>Non-prime</b> | <b>Prime</b> | <b>Id 1</b> | <b>Id 2</b> | <b>Id 3</b> | <b>Protein (Id1)</b> | <b>Fold-change<br/>(log<sub>2</sub>)</b> | <b>Fc<br/>standard<br/>deviation</b> | <b>X! Tandem<br/>hyperscore</b> | <b>ppm</b> |
|------------------|--------------|-------------|-------------|-------------|----------------------|------------------------------------------|--------------------------------------|---------------------------------|------------|
|------------------|--------------|-------------|-------------|-------------|----------------------|------------------------------------------|--------------------------------------|---------------------------------|------------|

Table S6

| <b>Non-prime</b> | <b>Prime</b> | <b>Id 1</b> | <b>Id 2</b> | <b>Id 3</b> | <b>Protein (Id1)</b> | <b>Fold-change (log<sub>2</sub>)</b> | <b>Fc standard deviation</b> | <b>X! Tandem hyperscore</b> | <b>ppm</b> |
|------------------|--------------|-------------|-------------|-------------|----------------------|--------------------------------------|------------------------------|-----------------------------|------------|
|------------------|--------------|-------------|-------------|-------------|----------------------|--------------------------------------|------------------------------|-----------------------------|------------|



Table S6

| <b>Non-prime</b> | <b>Prime</b> | <b>Id 1</b> | <b>Id 2</b> | <b>Id 3</b> | <b>Protein (Id1)</b> | <b>Fold-change<br/>(log<sub>2</sub>)</b> | <b>Fc<br/>standard<br/>deviation</b> | <b>X! Tandem<br/>hyperscore</b> | <b>ppm</b> |
|------------------|--------------|-------------|-------------|-------------|----------------------|------------------------------------------|--------------------------------------|---------------------------------|------------|
|------------------|--------------|-------------|-------------|-------------|----------------------|------------------------------------------|--------------------------------------|---------------------------------|------------|

Table S6

| <b>Non-prime</b> | <b>Prime</b> | <b>Id 1</b> | <b>Id 2</b> | <b>Id 3</b> | <b>Protein (Id1)</b> | <b>Fold-change (log<sub>2</sub>)</b> | <b>Fc standard deviation</b> | <b>X! Tandem hyperscore</b> | <b>ppm</b> |
|------------------|--------------|-------------|-------------|-------------|----------------------|--------------------------------------|------------------------------|-----------------------------|------------|
|------------------|--------------|-------------|-------------|-------------|----------------------|--------------------------------------|------------------------------|-----------------------------|------------|

Table S6

| <b>Non-prime</b> | <b>Prime</b> | <b>Id 1</b> | <b>Id 2</b> | <b>Id 3</b> | <b>Protein (Id1)</b> | <b>Fold-change (log<sub>2</sub>)</b> | <b>Fc standard deviation</b> | <b>X! Tandem hyperscore</b> | <b>ppm</b> |
|------------------|--------------|-------------|-------------|-------------|----------------------|--------------------------------------|------------------------------|-----------------------------|------------|
|------------------|--------------|-------------|-------------|-------------|----------------------|--------------------------------------|------------------------------|-----------------------------|------------|

Table S6

| <b>Non-prime</b> | <b>Prime</b> | <b>Id 1</b> | <b>Id 2</b> | <b>Id 3</b> | <b>Protein (Id1)</b> | <b>Fold-change<br/>(log<sub>2</sub>)</b> | <b>Fc<br/>standard<br/>deviation</b> | <b>X! Tandem<br/>hyperscore</b> | <b>ppm</b> |
|------------------|--------------|-------------|-------------|-------------|----------------------|------------------------------------------|--------------------------------------|---------------------------------|------------|
|------------------|--------------|-------------|-------------|-------------|----------------------|------------------------------------------|--------------------------------------|---------------------------------|------------|

Table S6

| <b>Non-prime</b> | <b>Prime</b> | <b>Id 1</b> | <b>Id 2</b> | <b>Id 3</b> | <b>Protein (Id1)</b> | <b>Fold-change (log<sub>2</sub>)</b> | <b>Fc standard deviation</b> | <b>X! Tandem hyperscore</b> | <b>ppm</b> |
|------------------|--------------|-------------|-------------|-------------|----------------------|--------------------------------------|------------------------------|-----------------------------|------------|
|------------------|--------------|-------------|-------------|-------------|----------------------|--------------------------------------|------------------------------|-----------------------------|------------|

Table S6

| <b>Non-prime</b> | <b>Prime</b> | <b>Id 1</b> | <b>Id 2</b> | <b>Id 3</b> | <b>Protein (Id1)</b> | <b>Fold-change (log<sub>2</sub>)</b> | <b>Fc standard deviation</b> | <b>X! Tandem hyperscore</b> | <b>ppm</b> |
|------------------|--------------|-------------|-------------|-------------|----------------------|--------------------------------------|------------------------------|-----------------------------|------------|
|------------------|--------------|-------------|-------------|-------------|----------------------|--------------------------------------|------------------------------|-----------------------------|------------|

Table S6

| <b>Non-prime</b> | <b>Prime</b> | <b>Id 1</b> | <b>Id 2</b> | <b>Id 3</b> | <b>Protein (Id1)</b> | <b>Fold-change<br/>(log<sub>2</sub>)</b> | <b>Fc<br/>standard<br/>deviation</b> | <b>X! Tandem<br/>hyperscore</b> | <b>ppm</b> |
|------------------|--------------|-------------|-------------|-------------|----------------------|------------------------------------------|--------------------------------------|---------------------------------|------------|
|------------------|--------------|-------------|-------------|-------------|----------------------|------------------------------------------|--------------------------------------|---------------------------------|------------|

Table S6

| <b>Non-prime</b> | <b>Prime</b> | <b>Id 1</b> | <b>Id 2</b> | <b>Id 3</b> | <b>Protein (Id1)</b> | <b>Fold-change<br/>(log<sub>2</sub>)</b> | <b>Fc<br/>standard<br/>deviation</b> | <b>X! Tandem<br/>hyperscore</b> | <b>ppm</b> |
|------------------|--------------|-------------|-------------|-------------|----------------------|------------------------------------------|--------------------------------------|---------------------------------|------------|
|------------------|--------------|-------------|-------------|-------------|----------------------|------------------------------------------|--------------------------------------|---------------------------------|------------|



Table S6

| <b>Non-prime</b> | <b>Prime</b> | <b>Id 1</b> | <b>Id 2</b> | <b>Id 3</b> | <b>Protein (Id1)</b> | <b>Fold-change (log<sub>2</sub>)</b> | <b>Fc standard deviation</b> | <b>X! Tandem hyperscore</b> | <b>ppm</b> |
|------------------|--------------|-------------|-------------|-------------|----------------------|--------------------------------------|------------------------------|-----------------------------|------------|
|------------------|--------------|-------------|-------------|-------------|----------------------|--------------------------------------|------------------------------|-----------------------------|------------|

Table S6

| <b>Non-prime</b> | <b>Prime</b> | <b>Id 1</b> | <b>Id 2</b> | <b>Id 3</b> | <b>Protein (Id1)</b> | <b>Fold-change<br/>(log<sub>2</sub>)</b> | <b>Fc<br/>standard<br/>deviation</b> | <b>X! Tandem<br/>hyperscore</b> | <b>ppm</b> |
|------------------|--------------|-------------|-------------|-------------|----------------------|------------------------------------------|--------------------------------------|---------------------------------|------------|
|------------------|--------------|-------------|-------------|-------------|----------------------|------------------------------------------|--------------------------------------|---------------------------------|------------|

Table S6

| <b>Non-prime</b> | <b>Prime</b> | <b>Id 1</b> | <b>Id 2</b> | <b>Id 3</b> | <b>Protein (Id1)</b> | <b>Fold-change (log<sub>2</sub>)</b> | <b>Fc standard deviation</b> | <b>X! Tandem hyperscore</b> | <b>ppm</b> |
|------------------|--------------|-------------|-------------|-------------|----------------------|--------------------------------------|------------------------------|-----------------------------|------------|
|------------------|--------------|-------------|-------------|-------------|----------------------|--------------------------------------|------------------------------|-----------------------------|------------|

Table S6

| <b>Non-prime</b> | <b>Prime</b> | <b>Id 1</b> | <b>Id 2</b> | <b>Id 3</b> | <b>Protein (Id1)</b> | <b>Fold-change (log<sub>2</sub>)</b> | <b>Fc standard deviation</b> | <b>X! Tandem hyperscore</b> | <b>ppm</b> |
|------------------|--------------|-------------|-------------|-------------|----------------------|--------------------------------------|------------------------------|-----------------------------|------------|
|------------------|--------------|-------------|-------------|-------------|----------------------|--------------------------------------|------------------------------|-----------------------------|------------|

Table S6

| <b>Non-prime</b> | <b>Prime</b> | <b>Id 1</b> | <b>Id 2</b> | <b>Id 3</b> | <b>Protein (Id1)</b> | <b>Fold-change<br/>(log<sub>2</sub>)</b> | <b>Fc<br/>standard<br/>deviation</b> | <b>X! Tandem<br/>hyperscore</b> | <b>ppm</b> |
|------------------|--------------|-------------|-------------|-------------|----------------------|------------------------------------------|--------------------------------------|---------------------------------|------------|
|------------------|--------------|-------------|-------------|-------------|----------------------|------------------------------------------|--------------------------------------|---------------------------------|------------|

Table S6

| <b>Non-prime</b> | <b>Prime</b> | <b>Id 1</b> | <b>Id 2</b> | <b>Id 3</b> | <b>Protein (Id1)</b> | <b>Fold-change (log<sub>2</sub>)</b> | <b>Fc standard deviation</b> | <b>X! Tandem hyperscore</b> | <b>ppm</b> |
|------------------|--------------|-------------|-------------|-------------|----------------------|--------------------------------------|------------------------------|-----------------------------|------------|
|------------------|--------------|-------------|-------------|-------------|----------------------|--------------------------------------|------------------------------|-----------------------------|------------|

Table S6

| <b>Non-prime</b> | <b>Prime</b> | <b>Id 1</b> | <b>Id 2</b> | <b>Id 3</b> | <b>Protein (Id1)</b> | <b>Fold-change (log<sub>2</sub>)</b> | <b>Fc standard deviation</b> | <b>X! Tandem hyperscore</b> | <b>ppm</b> |
|------------------|--------------|-------------|-------------|-------------|----------------------|--------------------------------------|------------------------------|-----------------------------|------------|
|------------------|--------------|-------------|-------------|-------------|----------------------|--------------------------------------|------------------------------|-----------------------------|------------|

Table S6

| <b>Non-prime</b> | <b>Prime</b> | <b>Id 1</b> | <b>Id 2</b> | <b>Id 3</b> | <b>Protein (Id1)</b> | <b>Fold-change<br/>(log<sub>2</sub>)</b> | <b>Fc<br/>standard<br/>deviation</b> | <b>X! Tandem<br/>hyperscore</b> | <b>ppm</b> |
|------------------|--------------|-------------|-------------|-------------|----------------------|------------------------------------------|--------------------------------------|---------------------------------|------------|
|------------------|--------------|-------------|-------------|-------------|----------------------|------------------------------------------|--------------------------------------|---------------------------------|------------|



Table S6

| <b>Non-prime</b> | <b>Prime</b> | <b>Id 1</b> | <b>Id 2</b> | <b>Id 3</b> | <b>Protein (Id1)</b> | <b>Fold-change (log<sub>2</sub>)</b> | <b>Fc standard deviation</b> | <b>X! Tandem hyperscore</b> | <b>ppm</b> |
|------------------|--------------|-------------|-------------|-------------|----------------------|--------------------------------------|------------------------------|-----------------------------|------------|
|------------------|--------------|-------------|-------------|-------------|----------------------|--------------------------------------|------------------------------|-----------------------------|------------|

Table S6

| <b>Non-prime</b> | <b>Prime</b> | <b>Id 1</b> | <b>Id 2</b> | <b>Id 3</b> | <b>Protein (Id1)</b> | <b>Fold-change (log<sub>2</sub>)</b> | <b>Fc standard deviation</b> | <b>X! Tandem hyperscore</b> | <b>ppm</b> |
|------------------|--------------|-------------|-------------|-------------|----------------------|--------------------------------------|------------------------------|-----------------------------|------------|
|------------------|--------------|-------------|-------------|-------------|----------------------|--------------------------------------|------------------------------|-----------------------------|------------|

Table S6

| <b>Non-prime</b> | <b>Prime</b> | <b>Id 1</b> | <b>Id 2</b> | <b>Id 3</b> | <b>Protein (Id1)</b> | <b>Fold-change<br/>(log<sub>2</sub>)</b> | <b>Fc<br/>standard<br/>deviation</b> | <b>X! Tandem<br/>hyperscore</b> | <b>ppm</b> |
|------------------|--------------|-------------|-------------|-------------|----------------------|------------------------------------------|--------------------------------------|---------------------------------|------------|
|------------------|--------------|-------------|-------------|-------------|----------------------|------------------------------------------|--------------------------------------|---------------------------------|------------|

Table S6

| <b>Non-prime</b> | <b>Prime</b> | <b>Id 1</b> | <b>Id 2</b> | <b>Id 3</b> | <b>Protein (Id1)</b> | <b>Fold-change (log<sub>2</sub>)</b> | <b>Fc standard deviation</b> | <b>X! Tandem hyperscore</b> | <b>ppm</b> |
|------------------|--------------|-------------|-------------|-------------|----------------------|--------------------------------------|------------------------------|-----------------------------|------------|
|------------------|--------------|-------------|-------------|-------------|----------------------|--------------------------------------|------------------------------|-----------------------------|------------|

Table S6

| <b>Non-prime</b> | <b>Prime</b> | <b>Id 1</b> | <b>Id 2</b> | <b>Id 3</b> | <b>Protein (Id1)</b> | <b>Fold-change (log<sub>2</sub>)</b> | <b>Fc standard deviation</b> | <b>X! Tandem hyperscore</b> | <b>ppm</b> |
|------------------|--------------|-------------|-------------|-------------|----------------------|--------------------------------------|------------------------------|-----------------------------|------------|
|------------------|--------------|-------------|-------------|-------------|----------------------|--------------------------------------|------------------------------|-----------------------------|------------|

Table S6

| <b>Non-prime</b> | <b>Prime</b> | <b>Id 1</b> | <b>Id 2</b> | <b>Id 3</b> | <b>Protein (Id1)</b> | <b>Fold-change<br/>(log<sub>2</sub>)</b> | <b>Fc<br/>standard<br/>deviation</b> | <b>X! Tandem<br/>hyperscore</b> | <b>ppm</b> |
|------------------|--------------|-------------|-------------|-------------|----------------------|------------------------------------------|--------------------------------------|---------------------------------|------------|
|------------------|--------------|-------------|-------------|-------------|----------------------|------------------------------------------|--------------------------------------|---------------------------------|------------|

Table S6

| <b>Non-prime</b> | <b>Prime</b> | <b>Id 1</b> | <b>Id 2</b> | <b>Id 3</b> | <b>Protein (Id1)</b> | <b>Fold-change (log<sub>2</sub>)</b> | <b>Fc standard deviation</b> | <b>X! Tandem hyperscore</b> | <b>ppm</b> |
|------------------|--------------|-------------|-------------|-------------|----------------------|--------------------------------------|------------------------------|-----------------------------|------------|
|------------------|--------------|-------------|-------------|-------------|----------------------|--------------------------------------|------------------------------|-----------------------------|------------|

Table S6

| <b>Non-prime</b> | <b>Prime</b> | <b>Id 1</b> | <b>Id 2</b> | <b>Id 3</b> | <b>Protein (Id1)</b> | <b>Fold-change (log<sub>2</sub>)</b> | <b>Fc standard deviation</b> | <b>X! Tandem hyperscore</b> | <b>ppm</b> |
|------------------|--------------|-------------|-------------|-------------|----------------------|--------------------------------------|------------------------------|-----------------------------|------------|
|------------------|--------------|-------------|-------------|-------------|----------------------|--------------------------------------|------------------------------|-----------------------------|------------|
